# Supplementary material
Source: ML conference proceedings conference paper supplement (https://openreview.net/forum?id=YPpkFqMX6V)

2-uniform hypergraph, number of hyperedges: 486

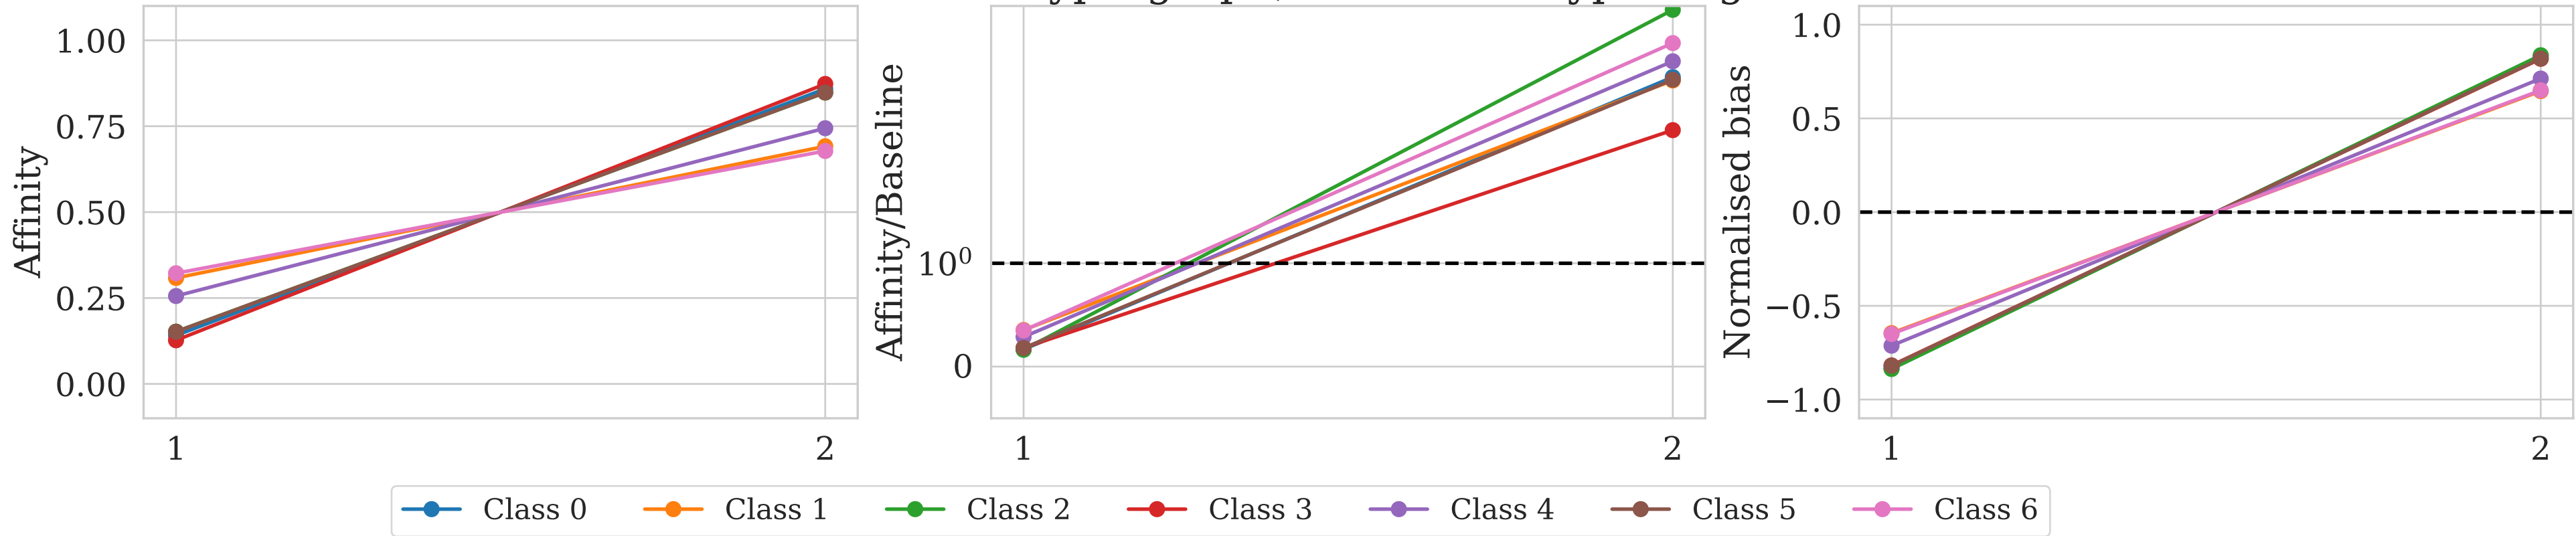

3-uniform hypergraph, number of hyperedges: 205

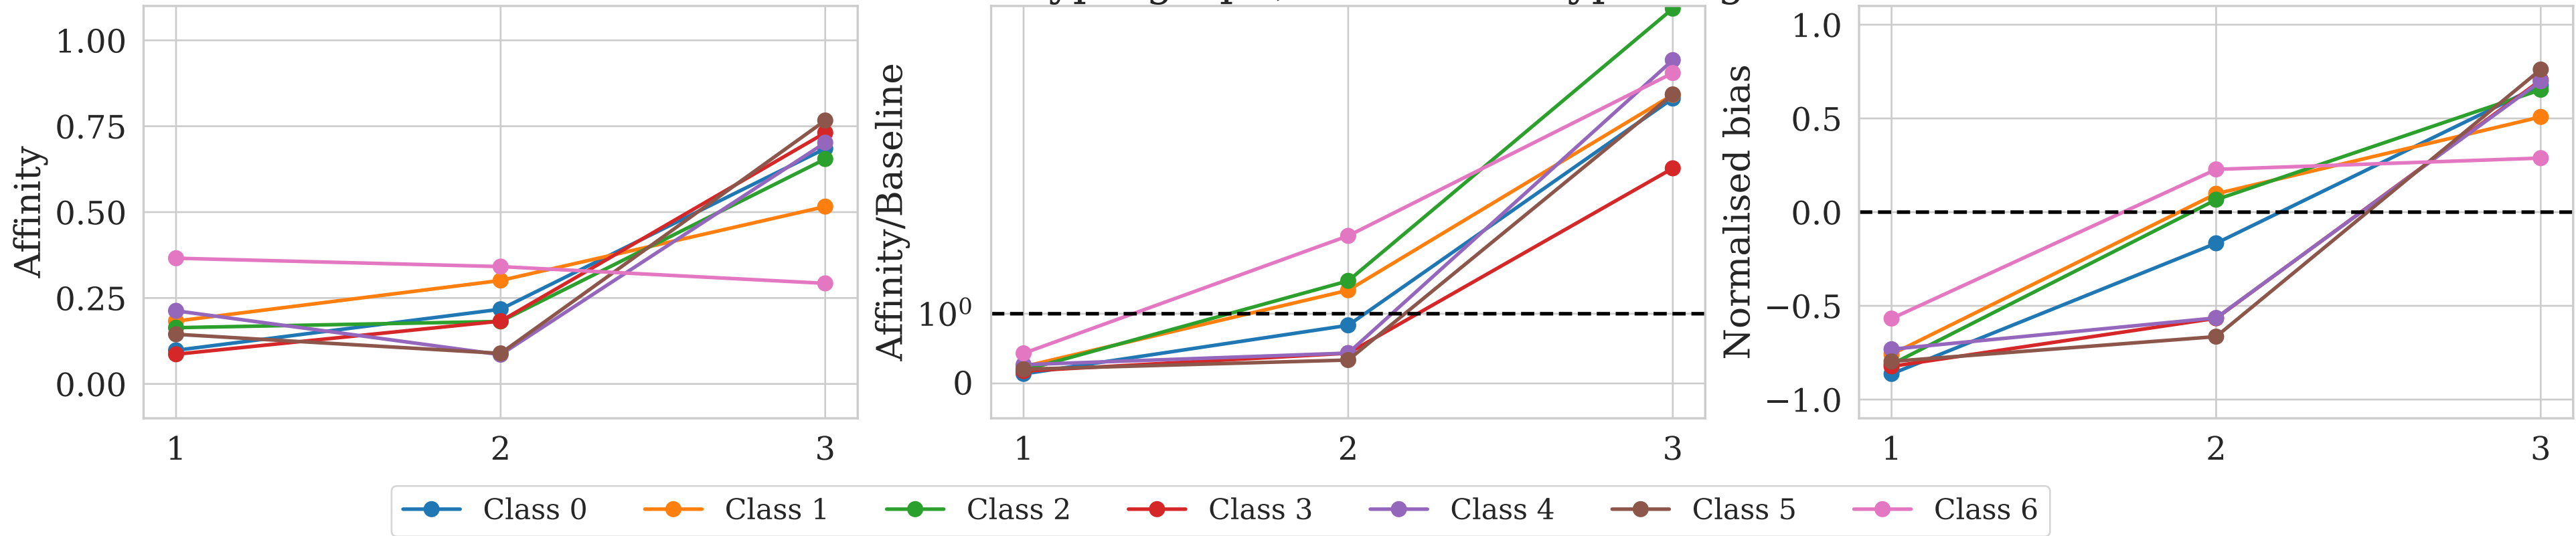

4-uniform hypergraph, number of hyperedges: 106

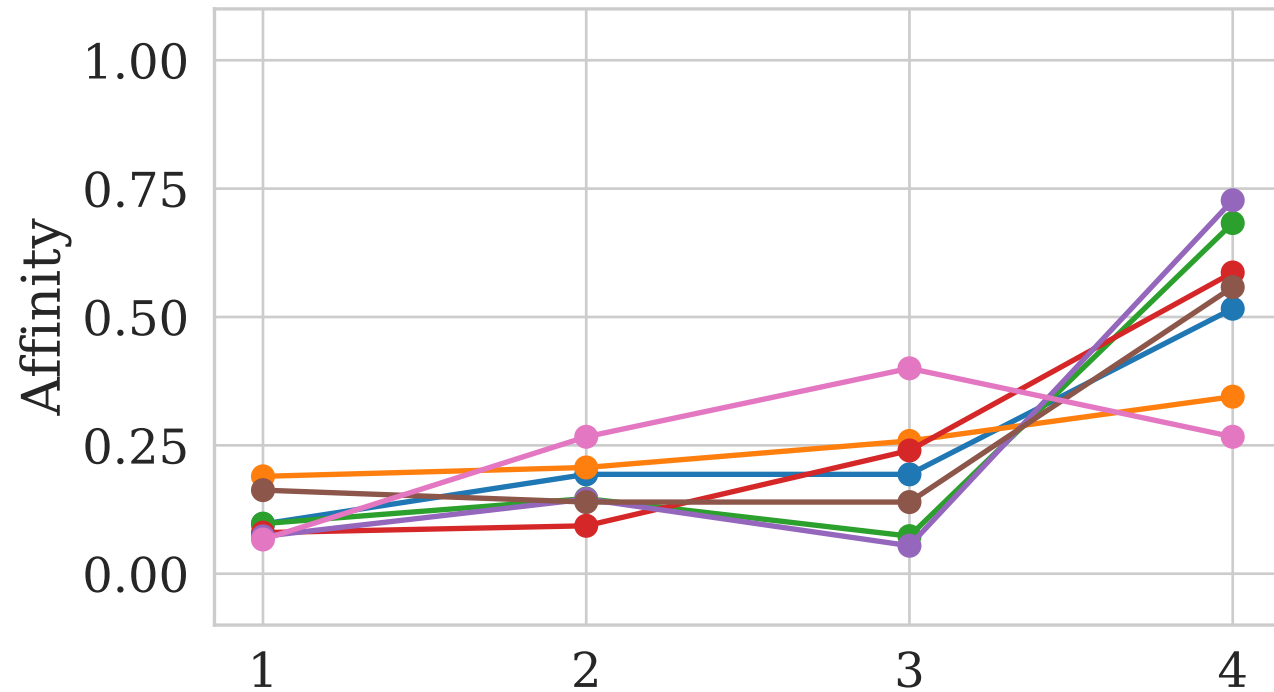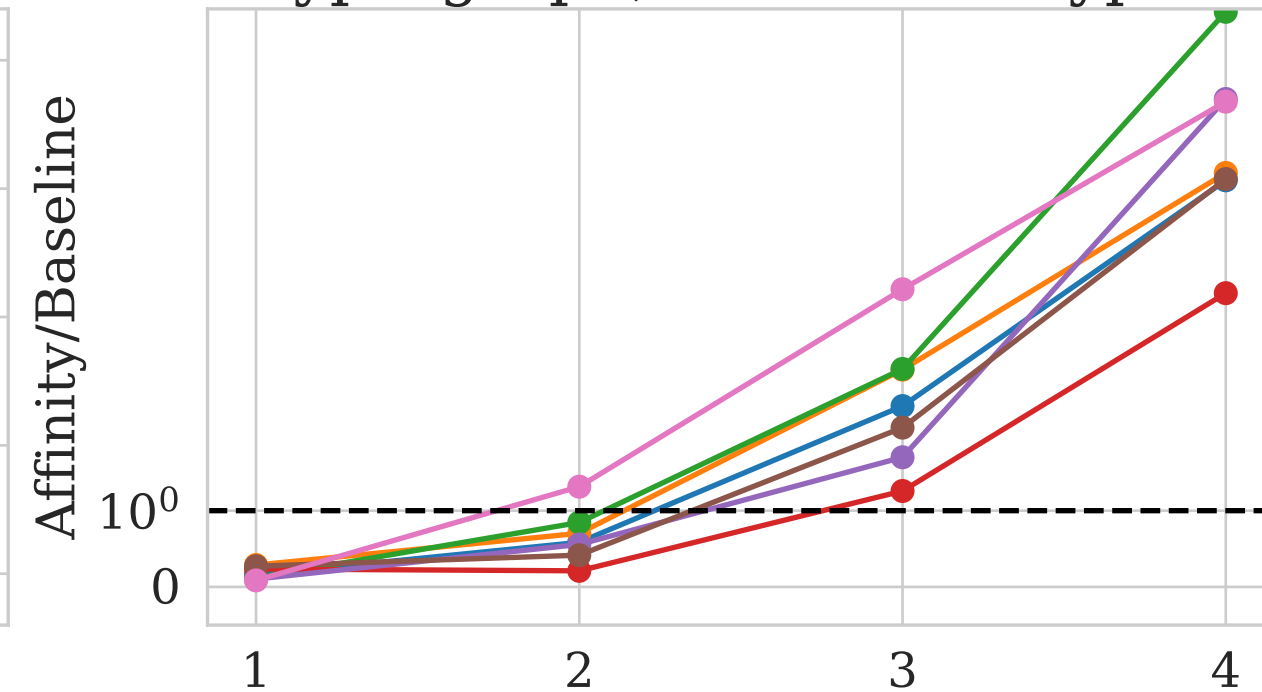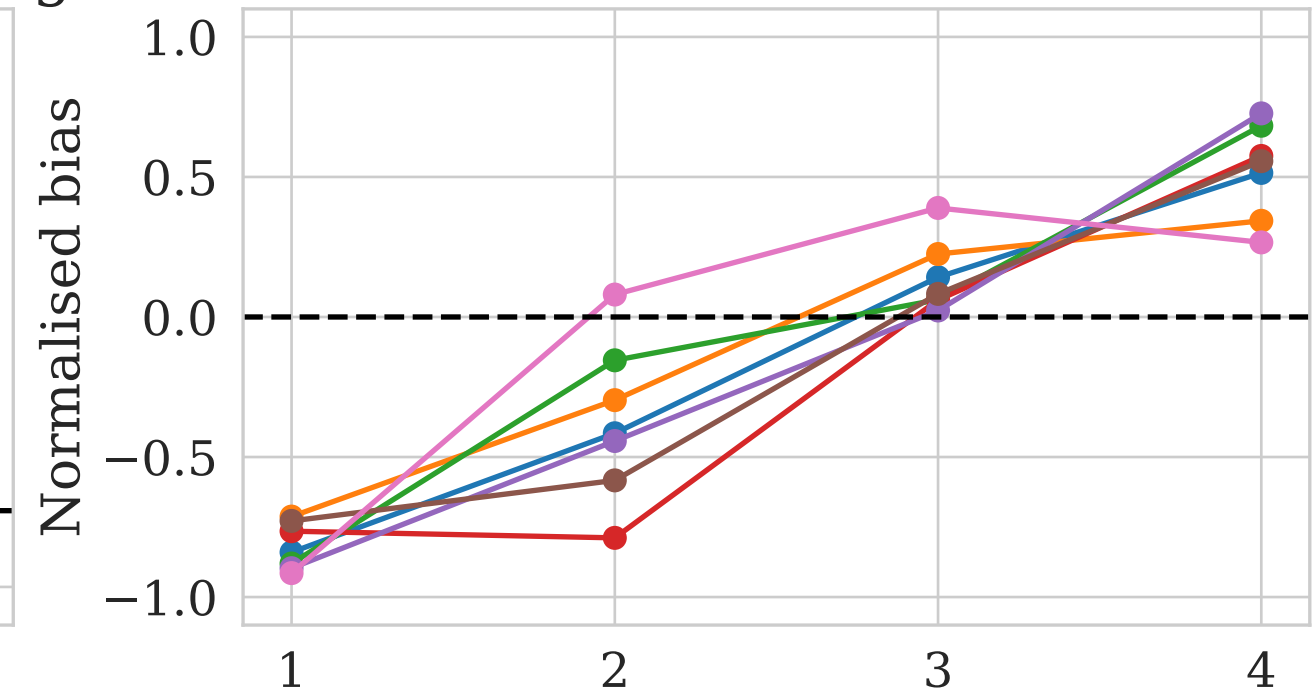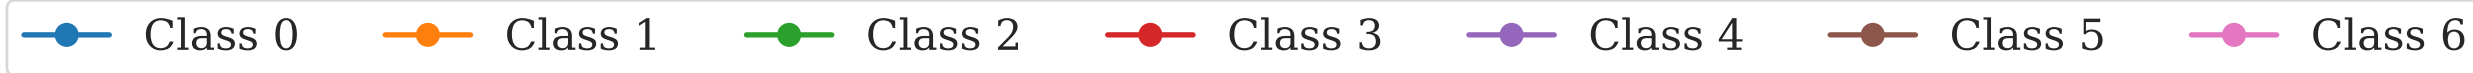

5-uniform hypergraph, number of hyperedges: 78

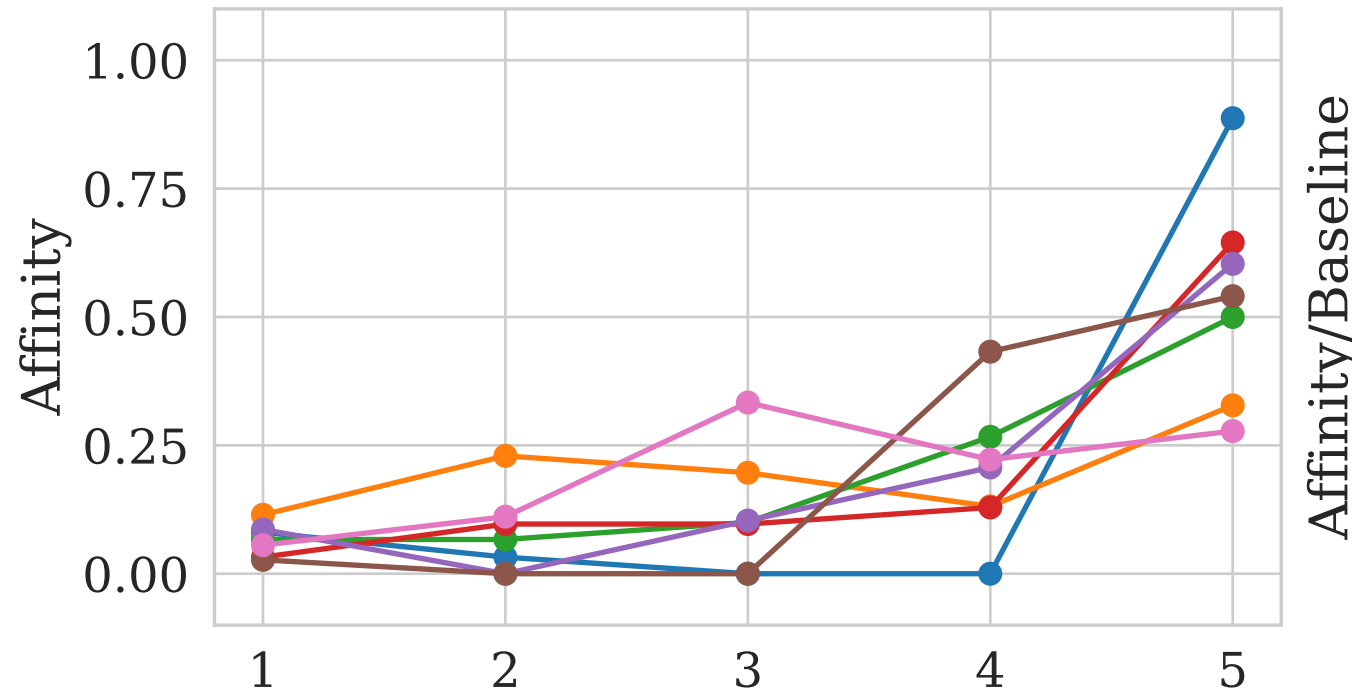

Affinity/Baseline

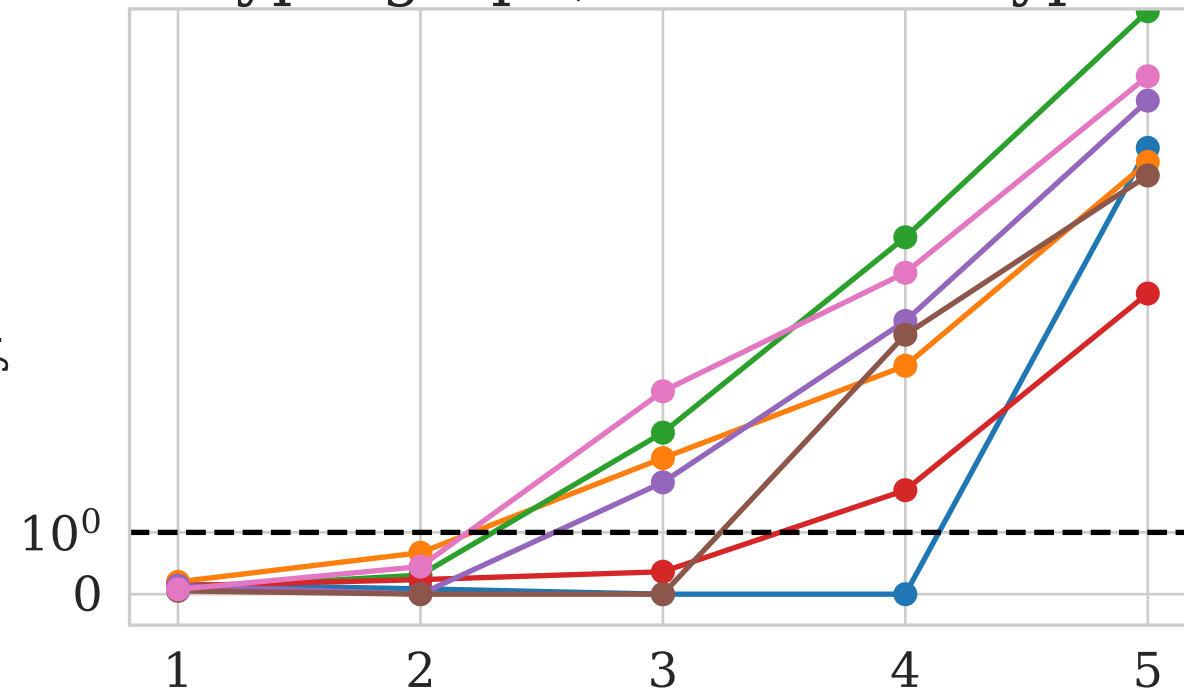

Normalised bias

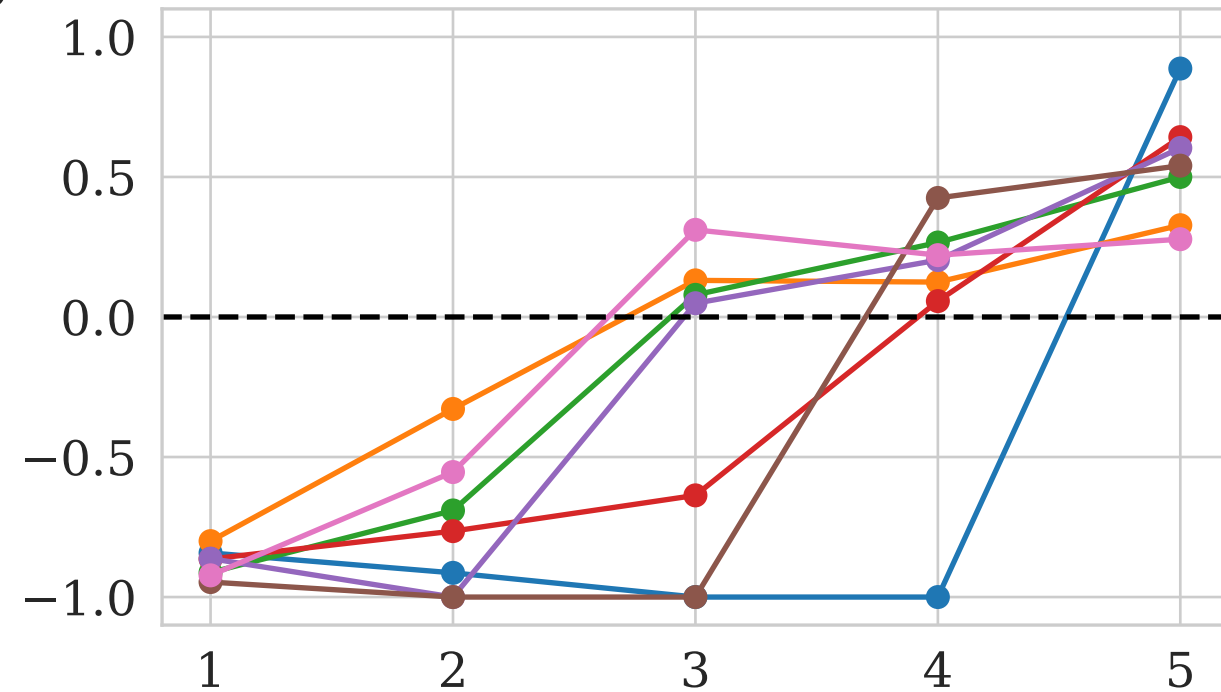

6-uniform hypergraph, number of hyperedges: 45

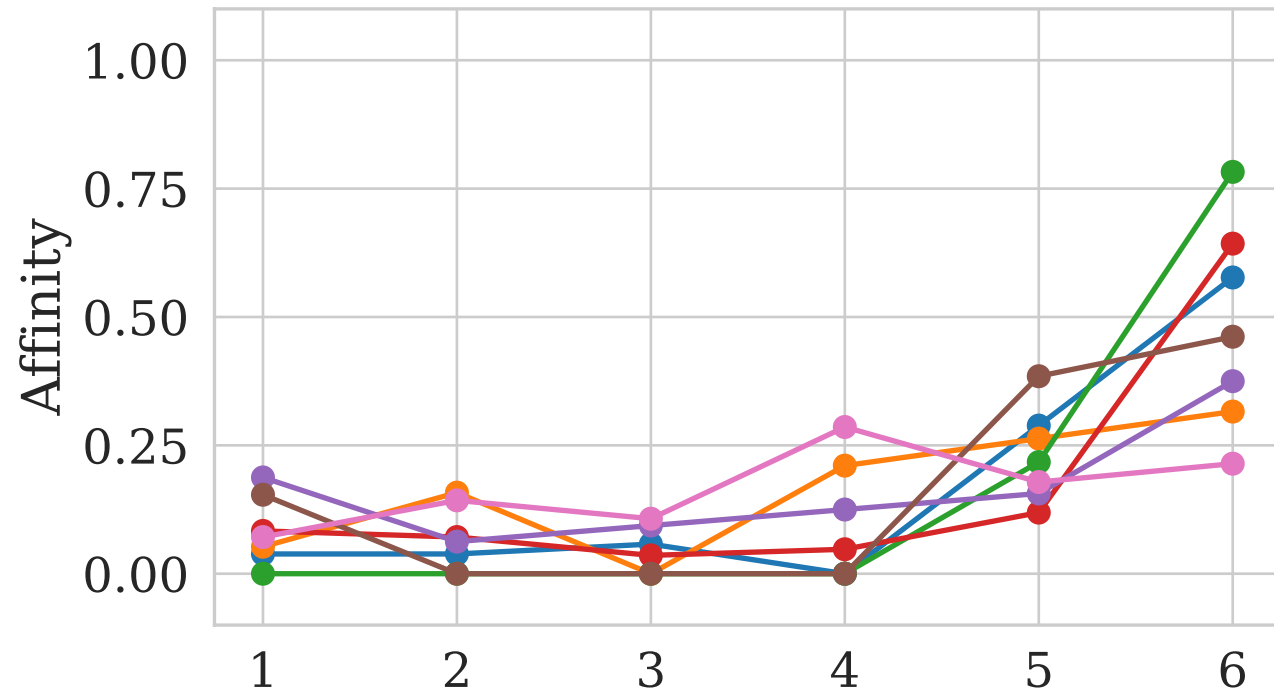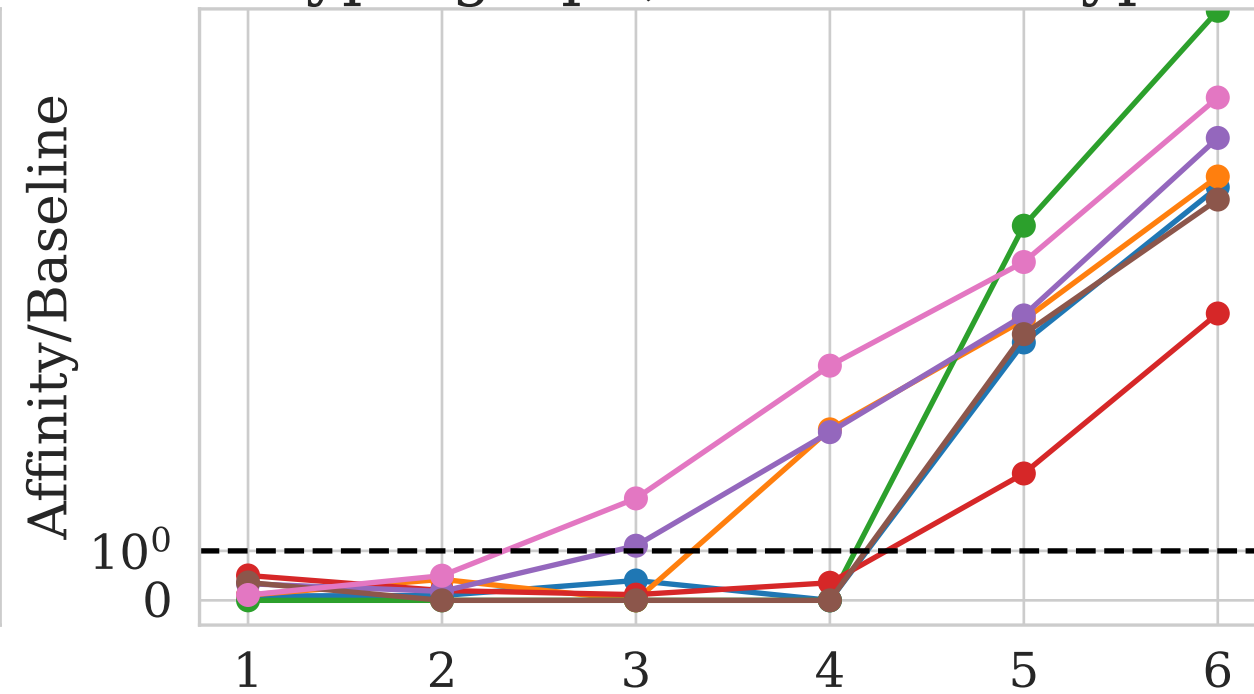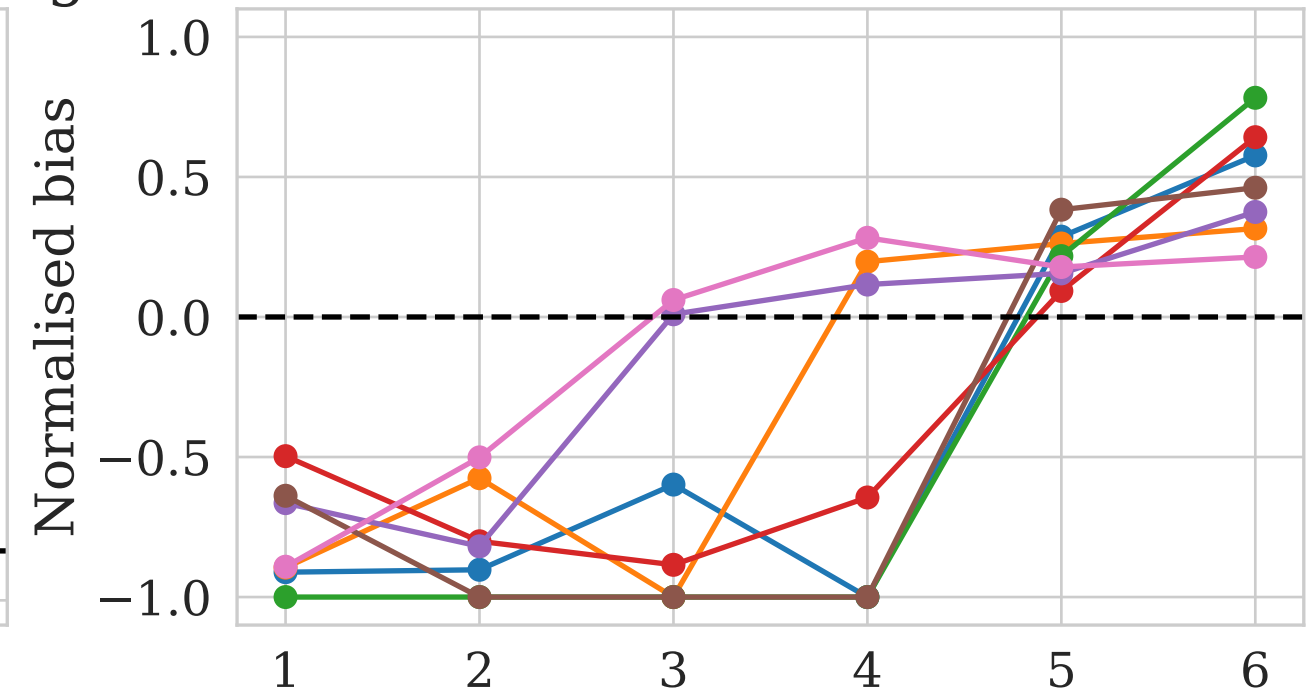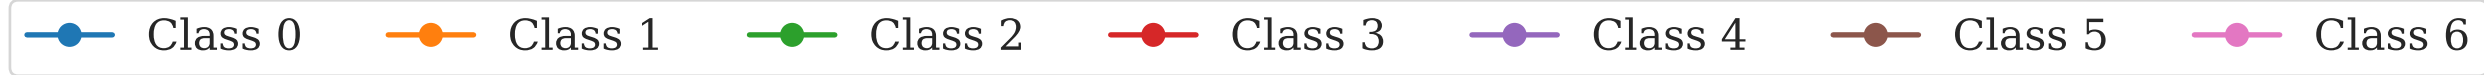

7-uniform hypergraph, number of hyperedges: 28

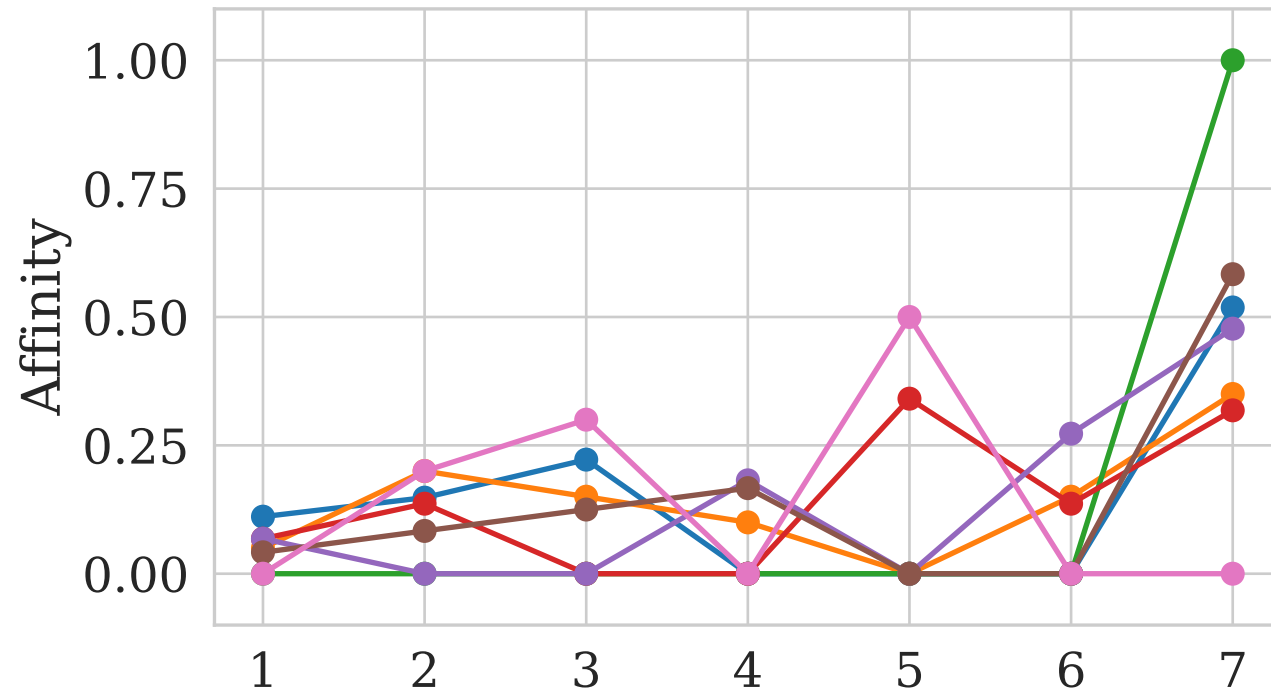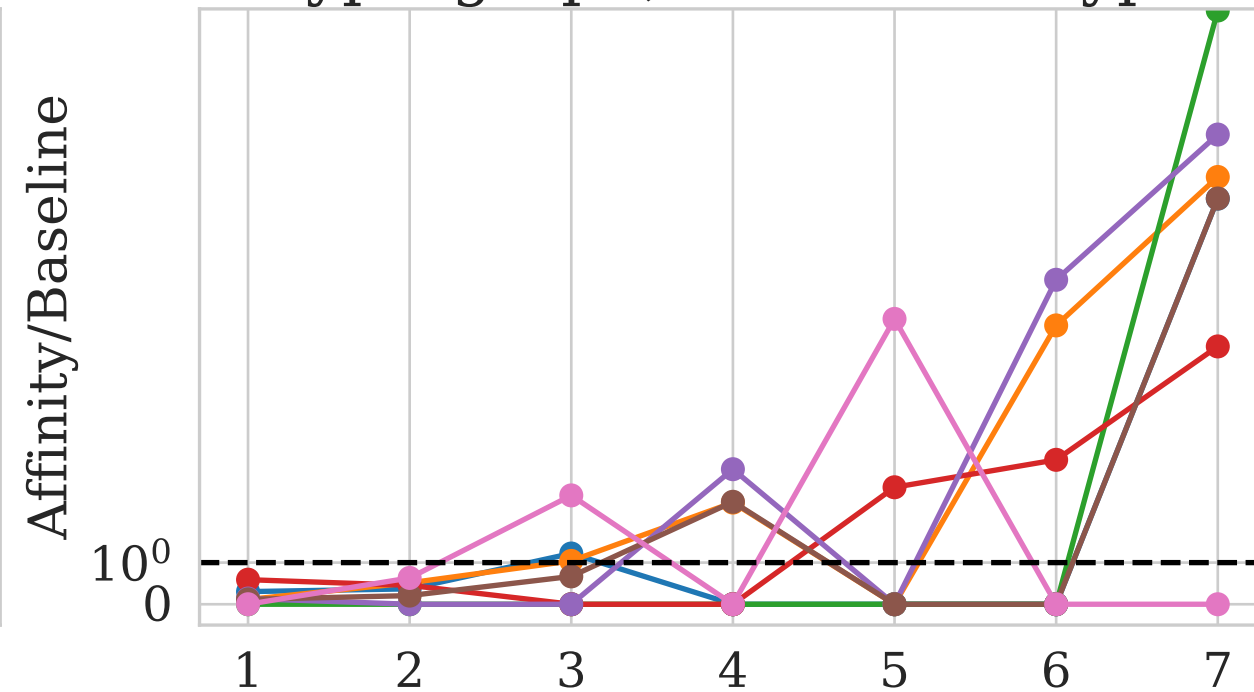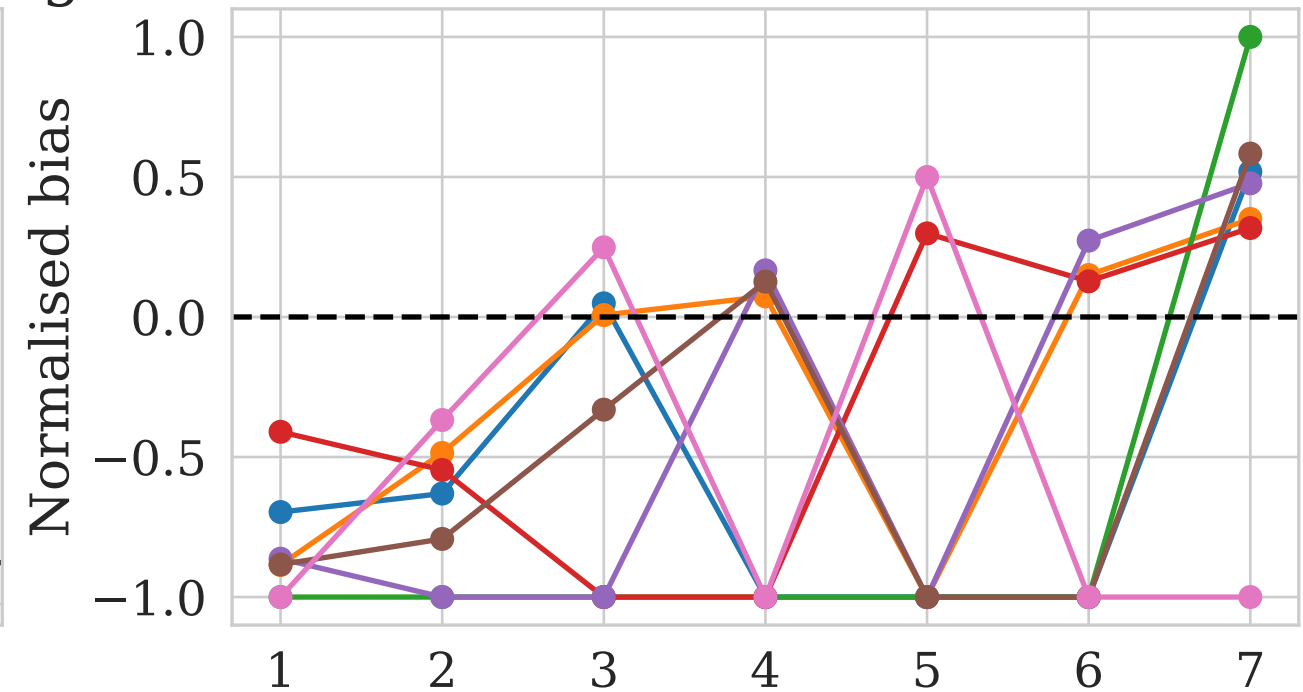

Class 0   Class 1   Class 2   Class 3   Class 4   Class 5   Class 6

8-uniform hypergraph, number of hyperedges: 21

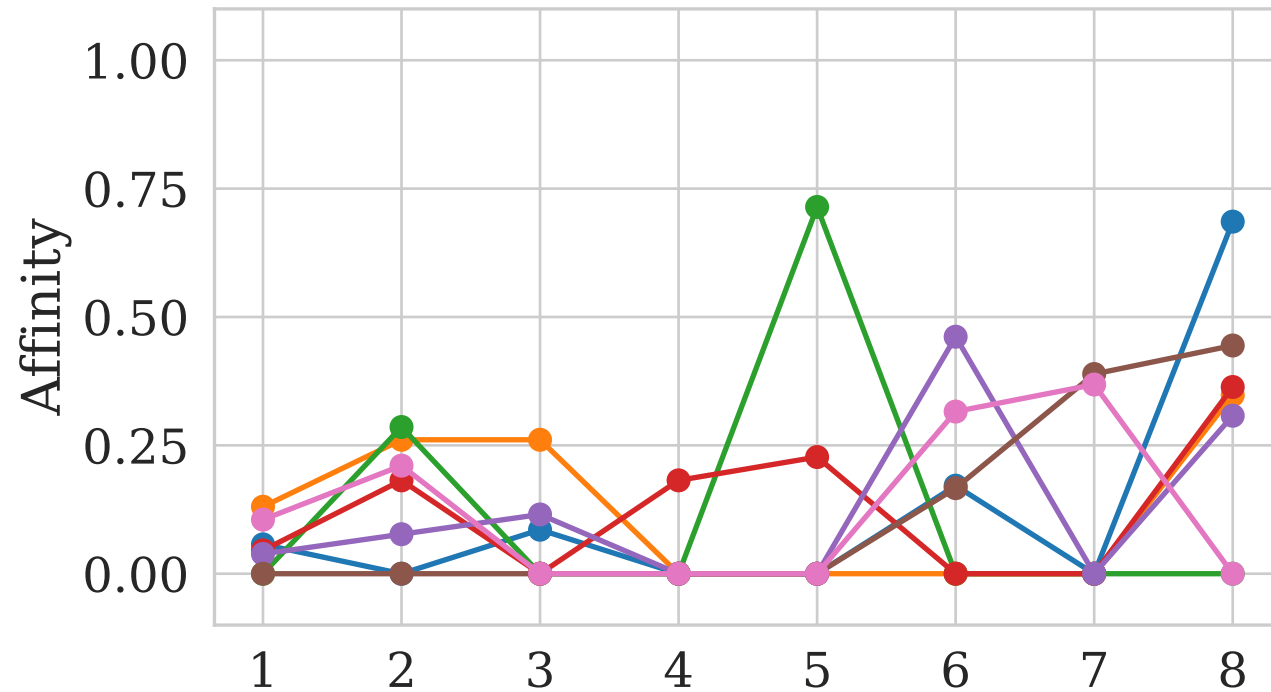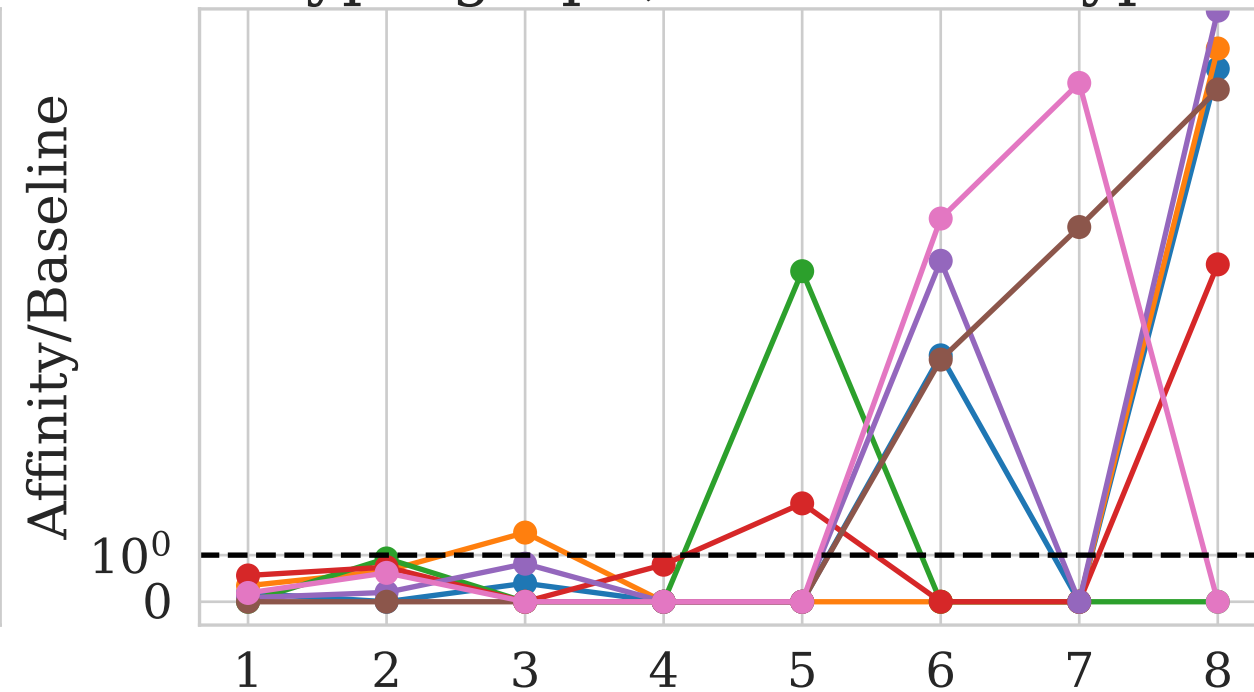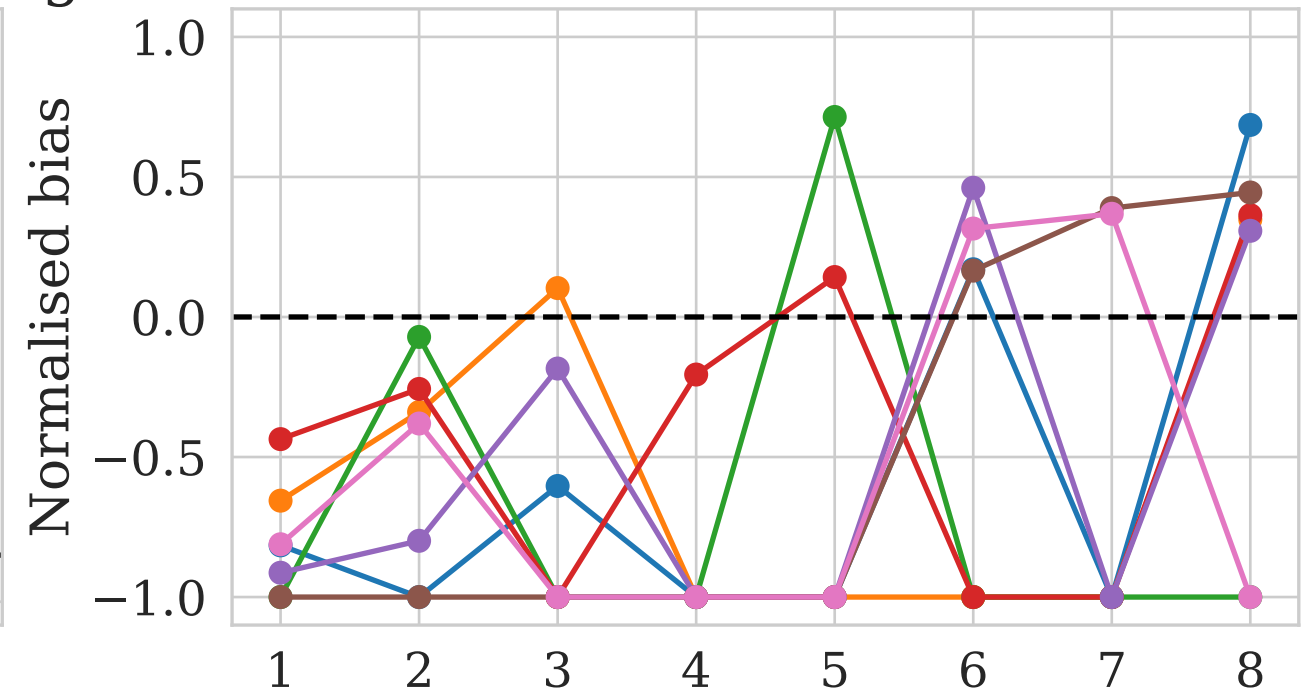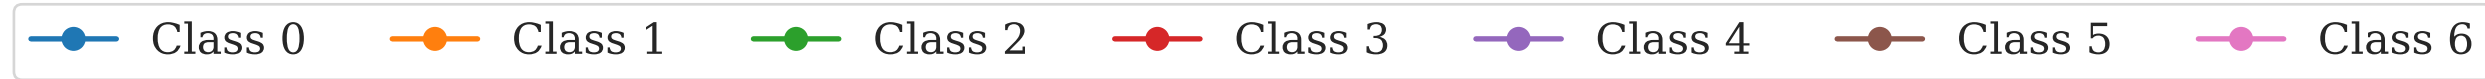

10-uniform hypergraph, number of hyperedges: 16

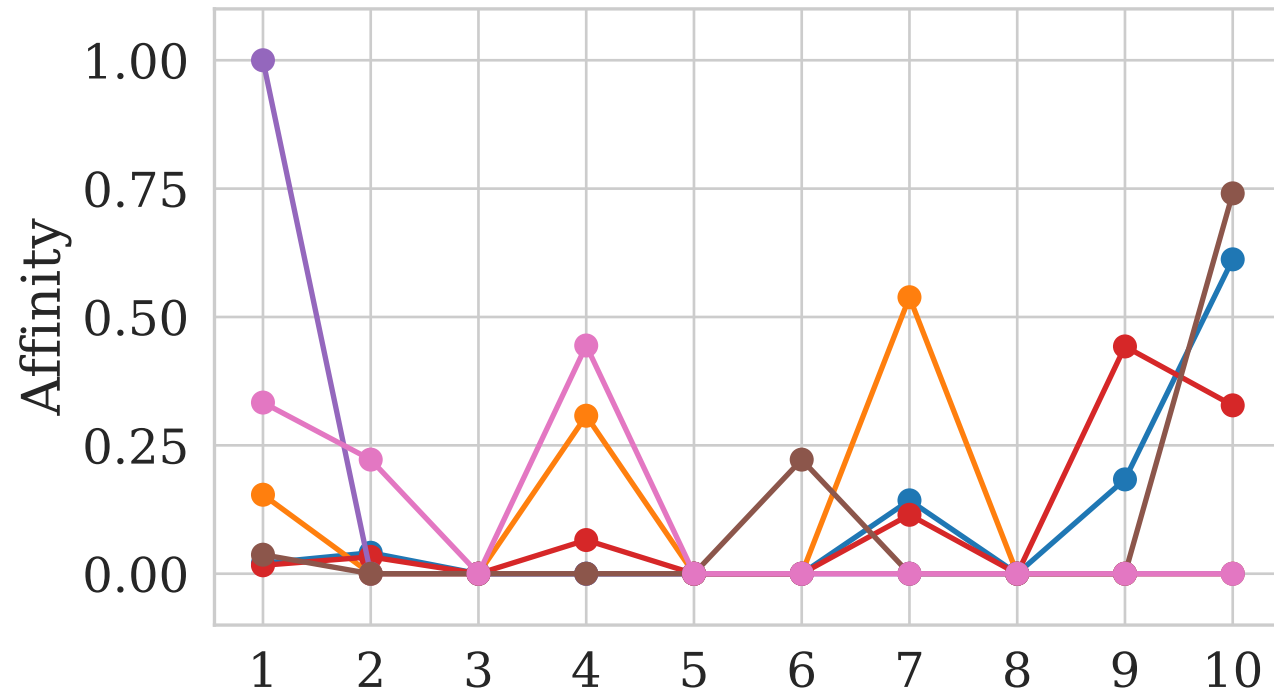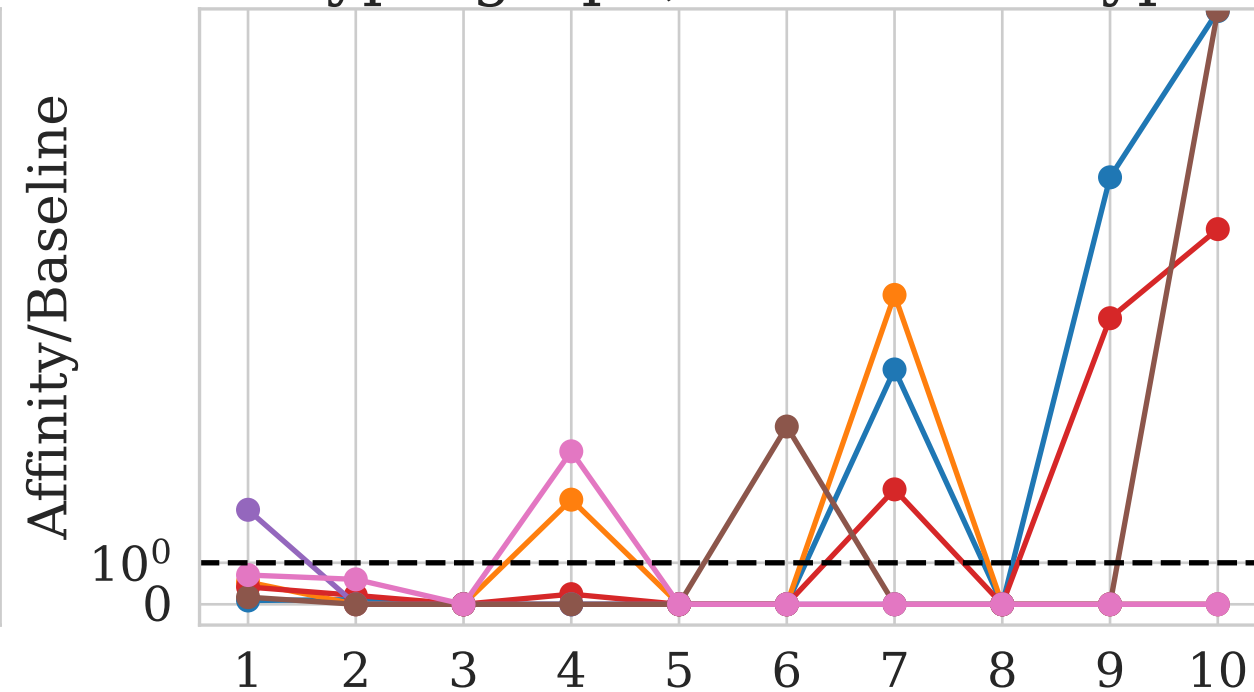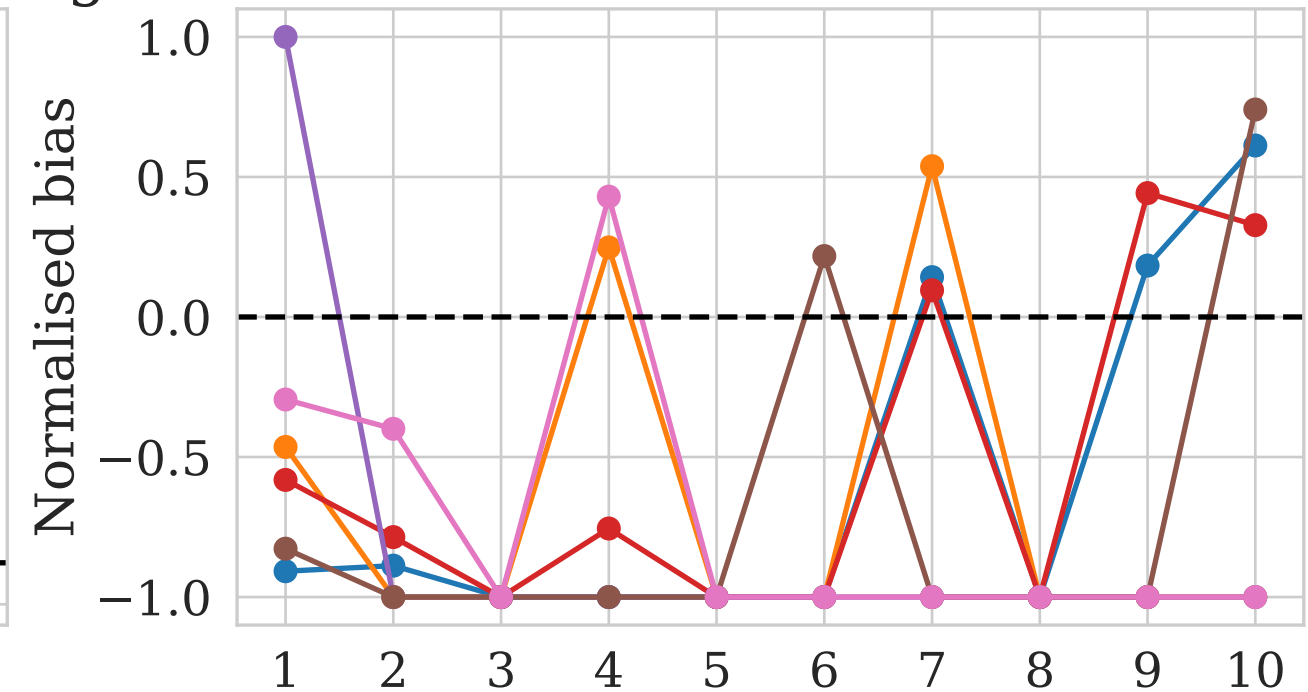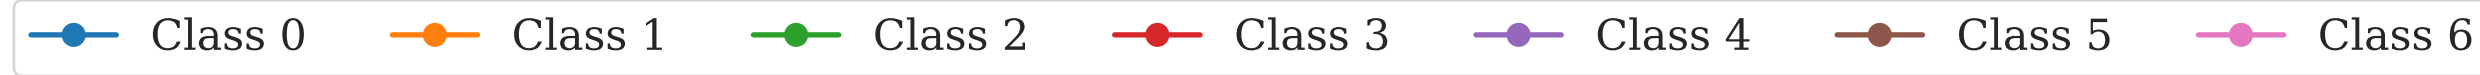



13-uniform hypergraph, number of hyperedges: 14

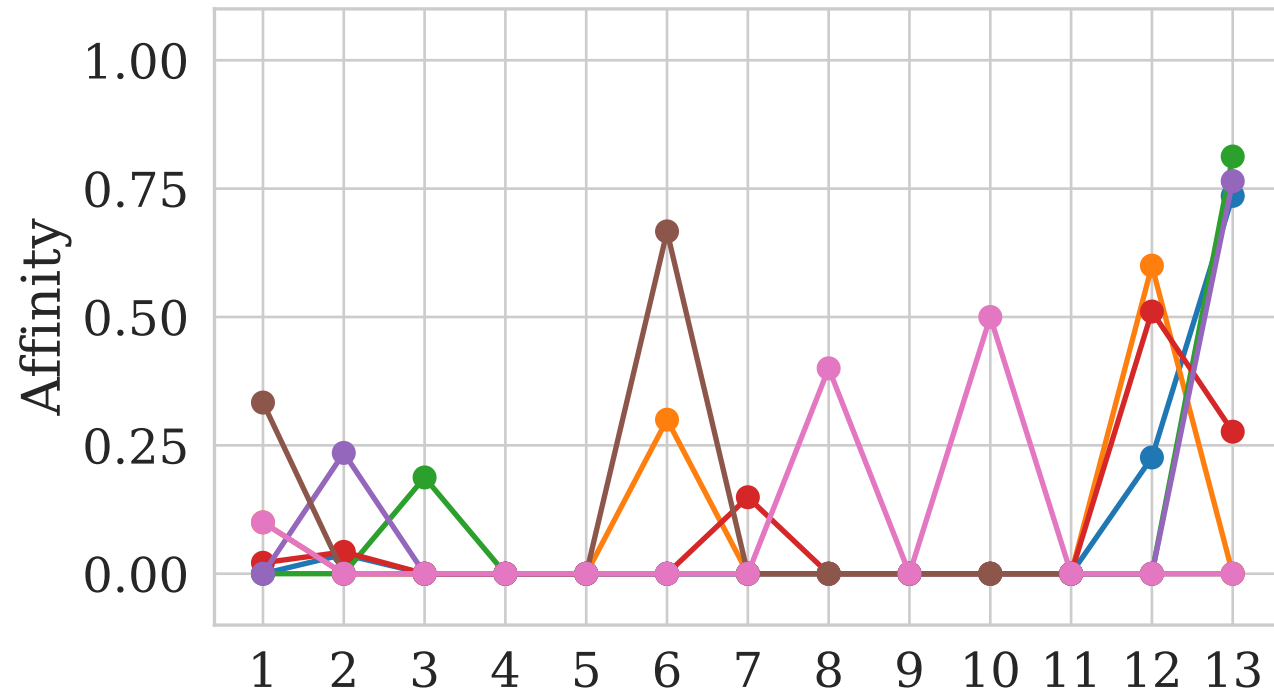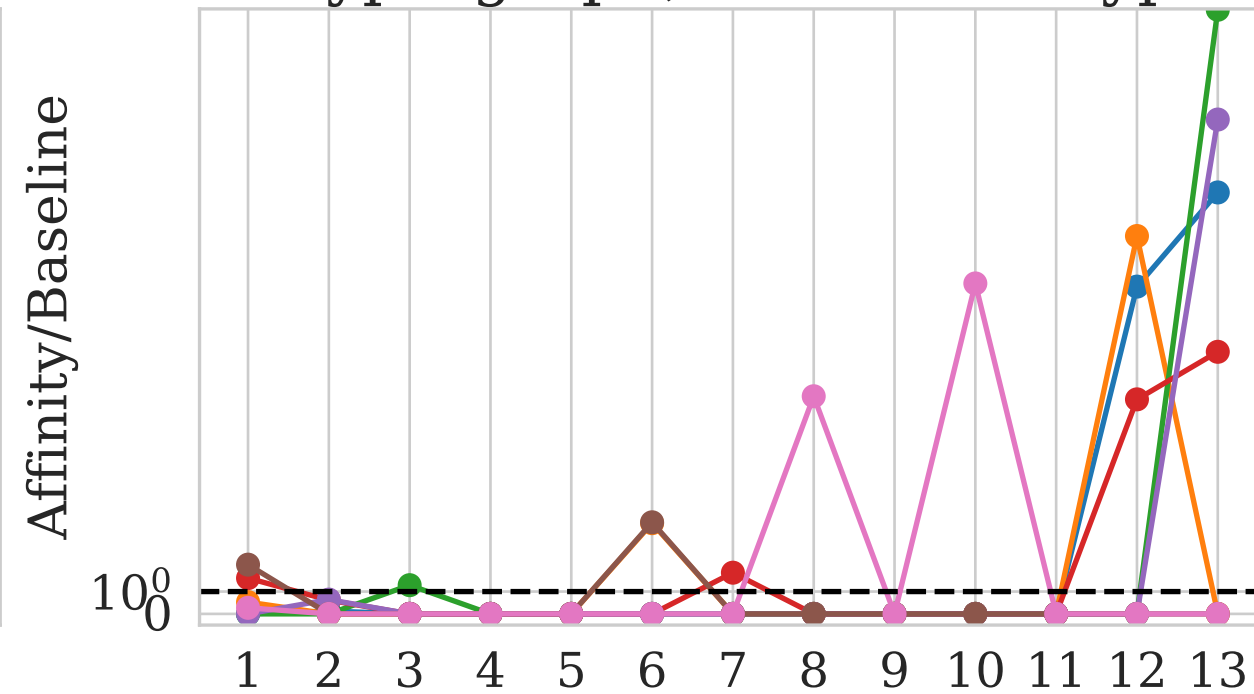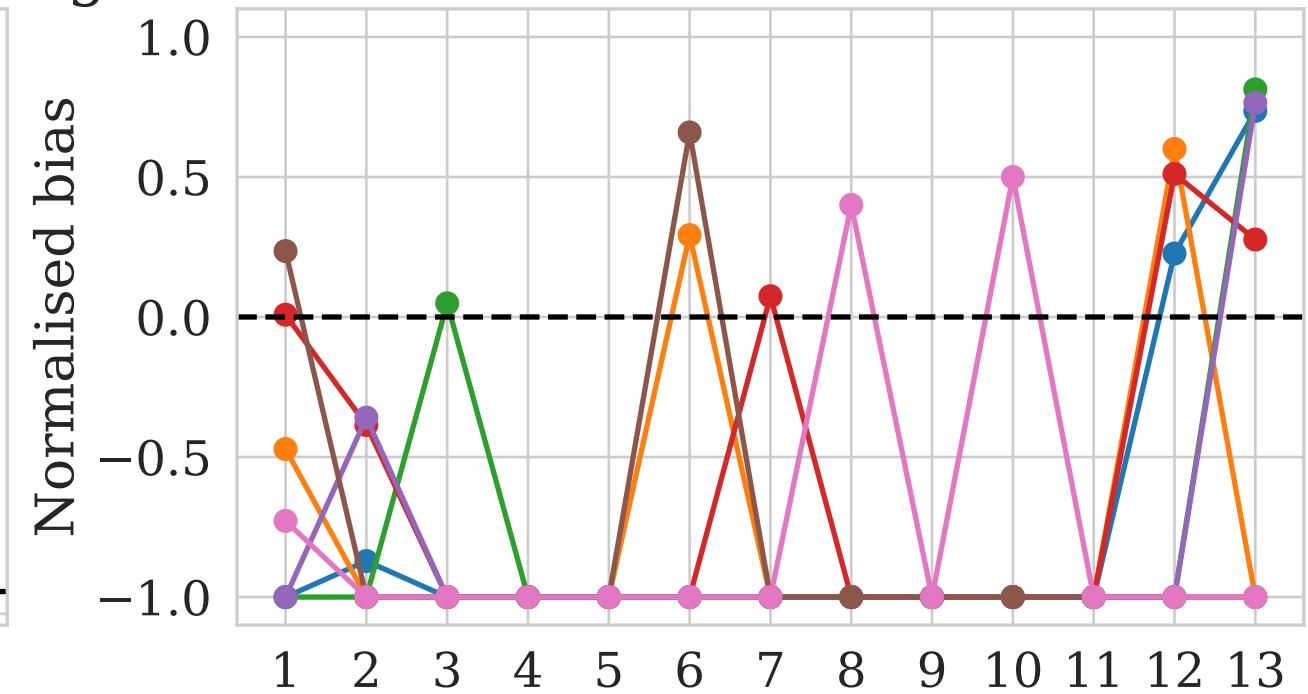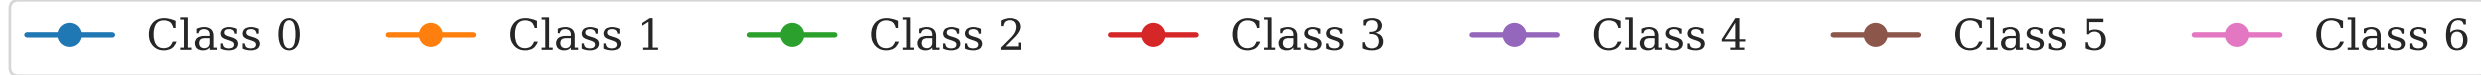

9-uniform hypergraph, number of hyperedges: 11

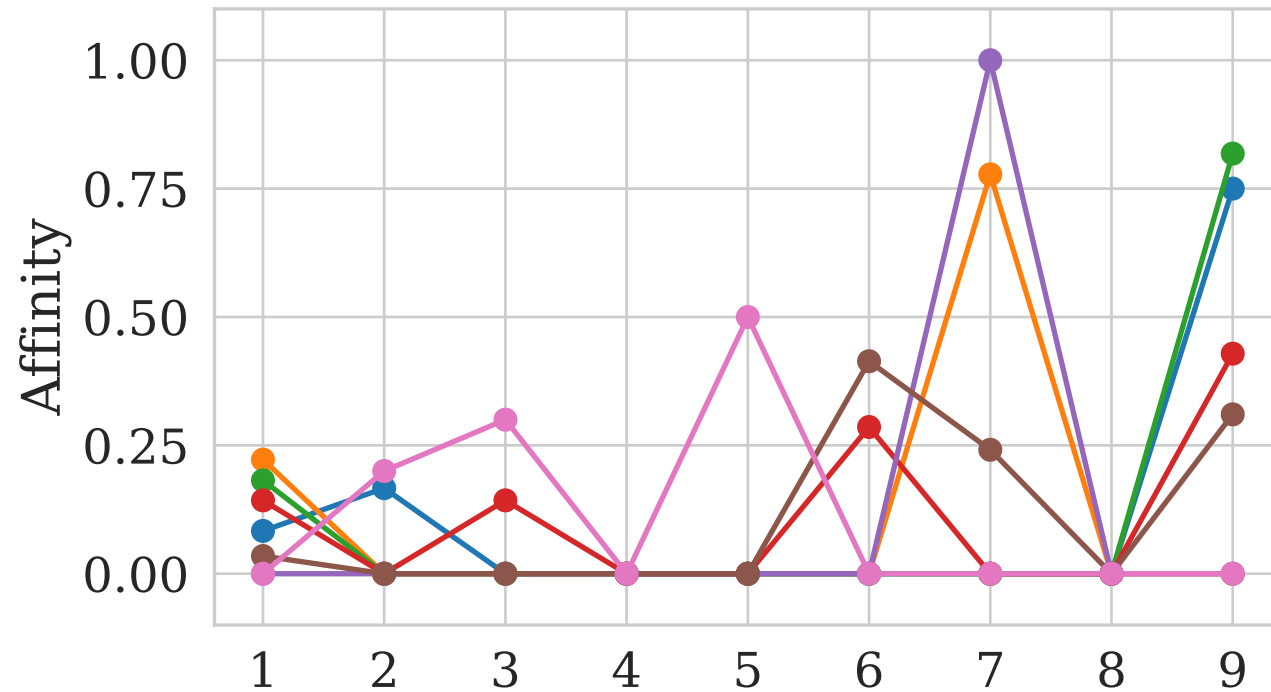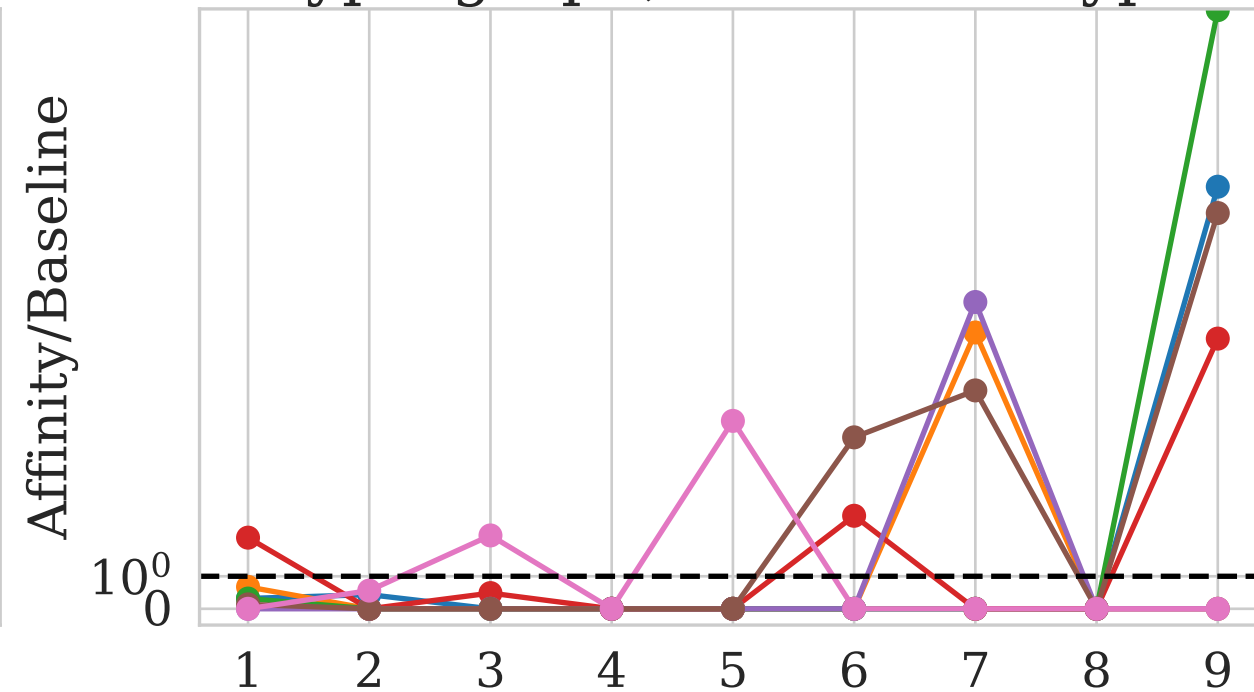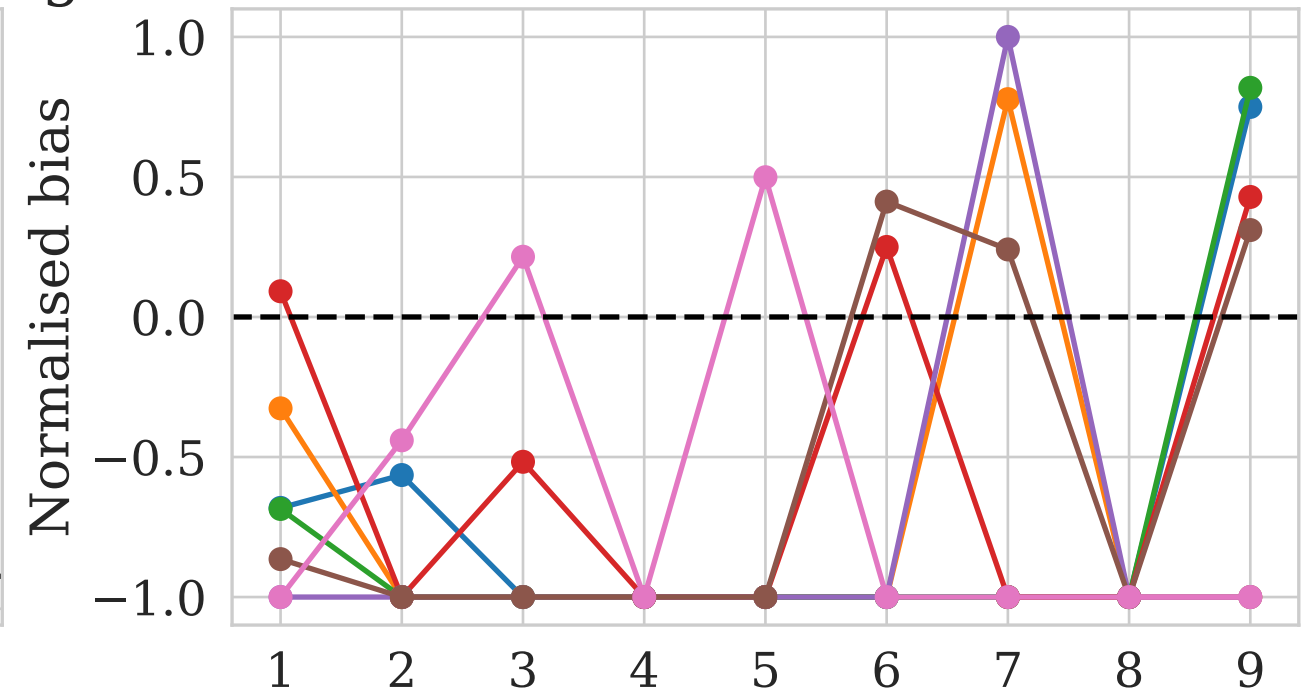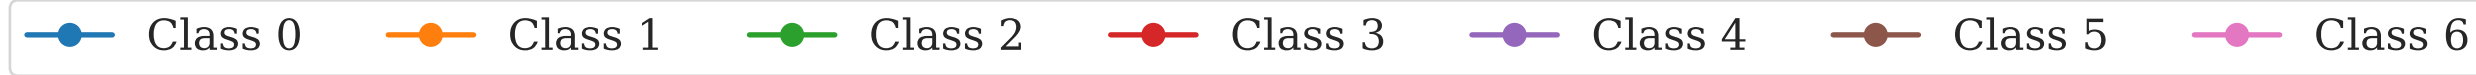

14-uniform hypergraph, number of hyperedges: 11

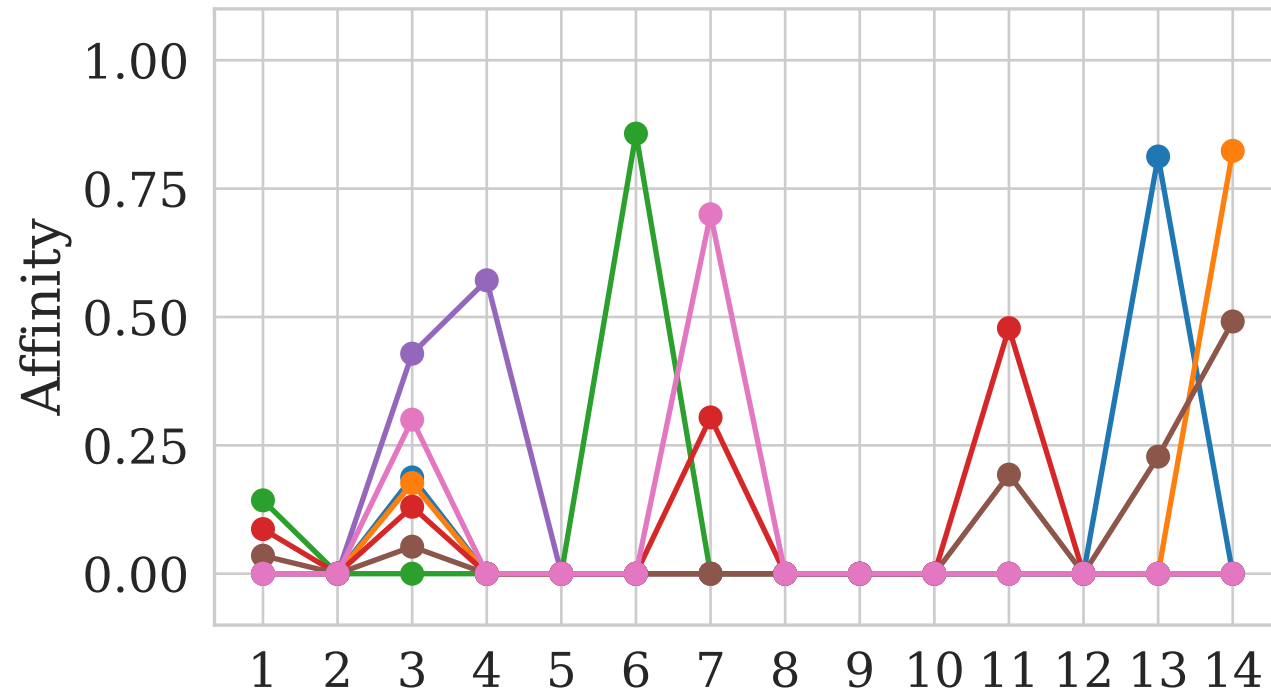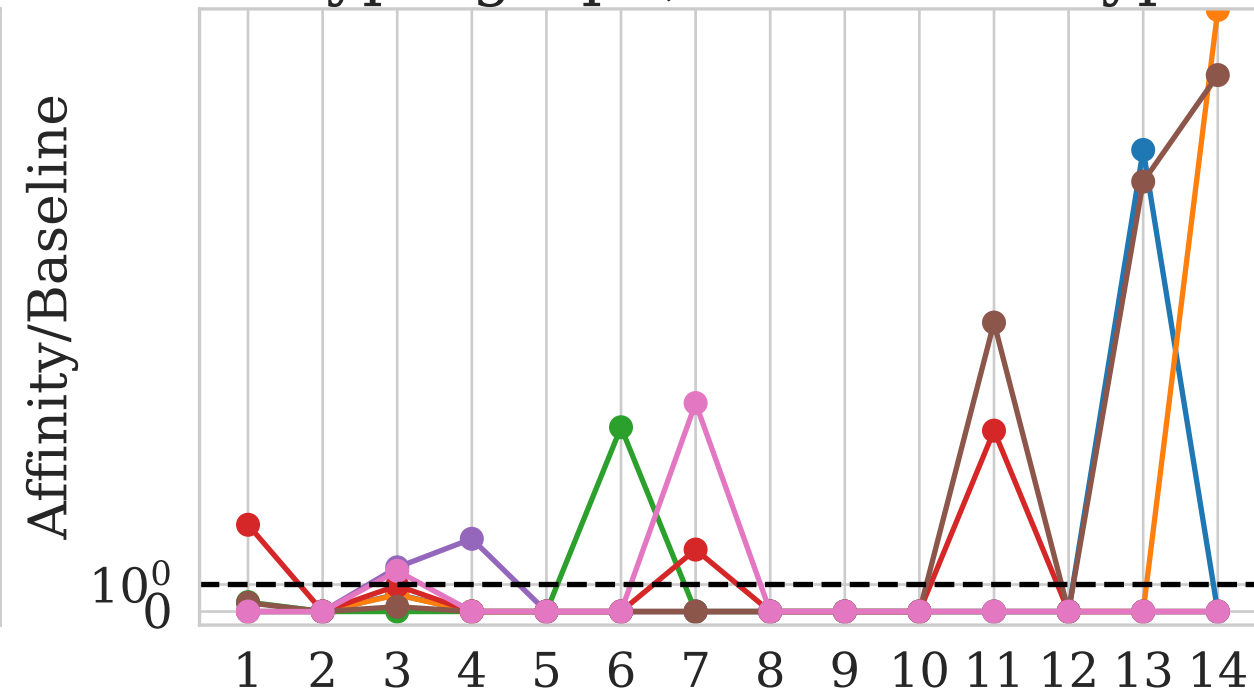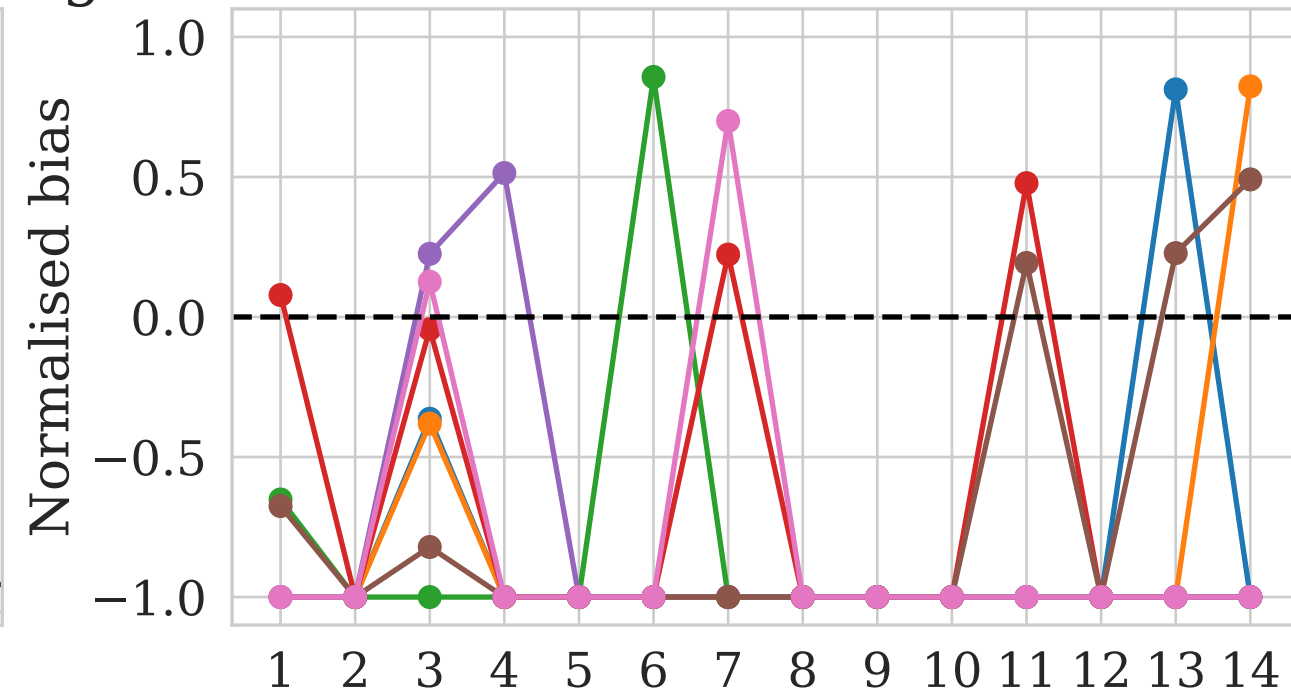

Class 0 Class 1 Class 2 Class 3 Class 4 Class 5 Class 6

11-uniform hypergraph, number of hyperedges: 7

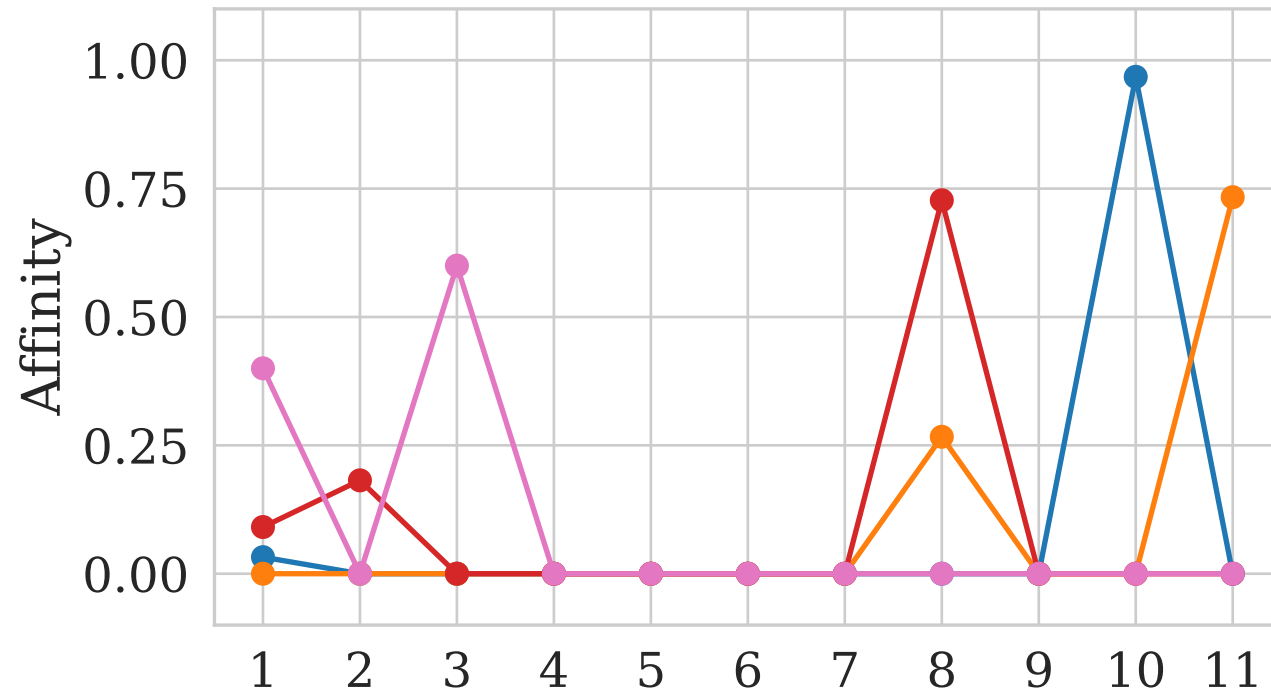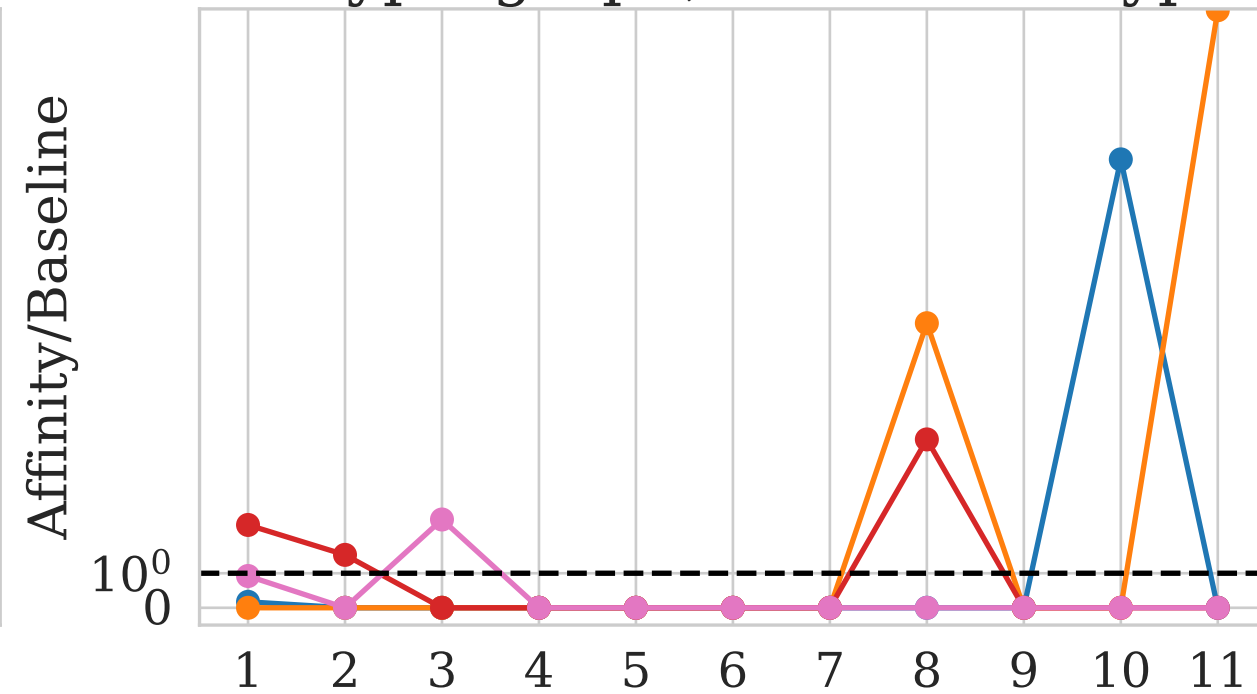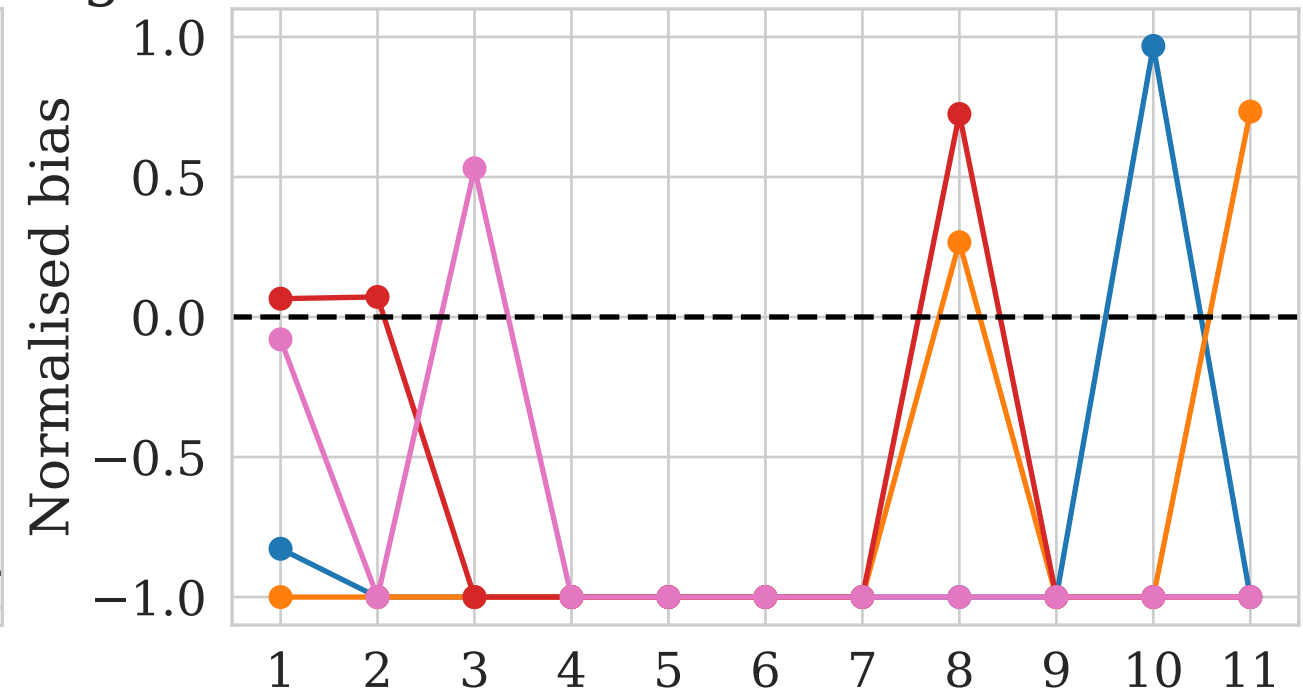

19-uniform hypergraph, number of hyperedges: 6

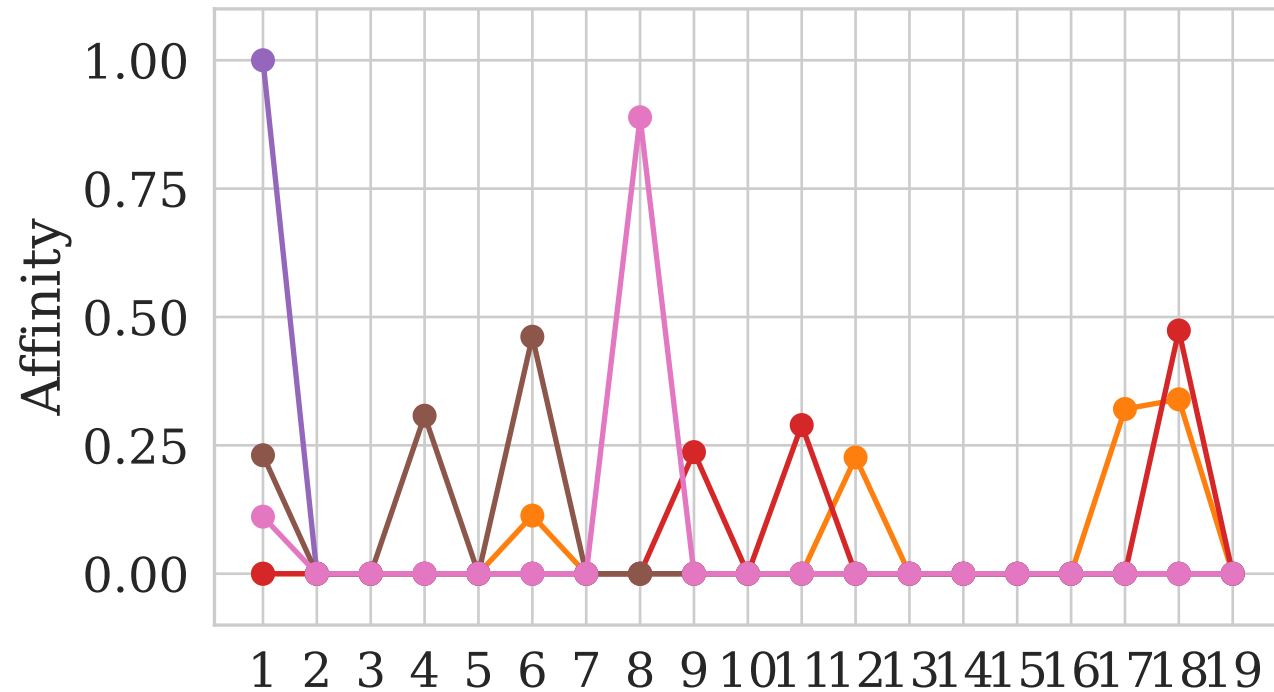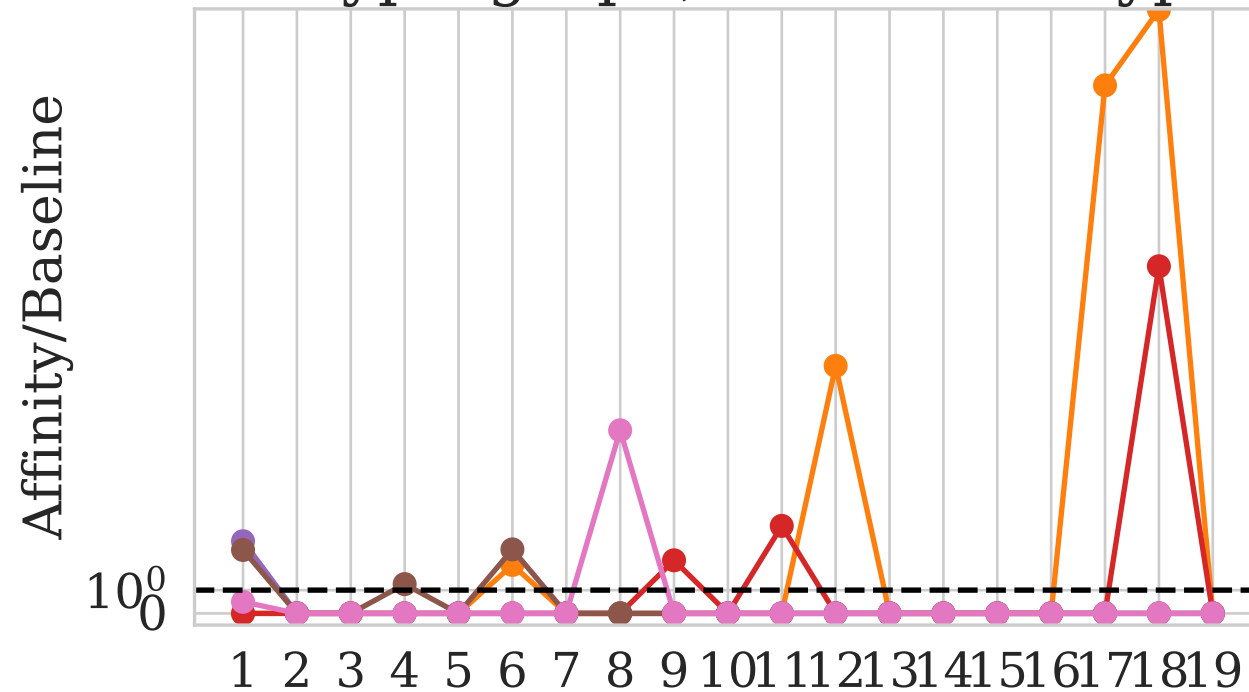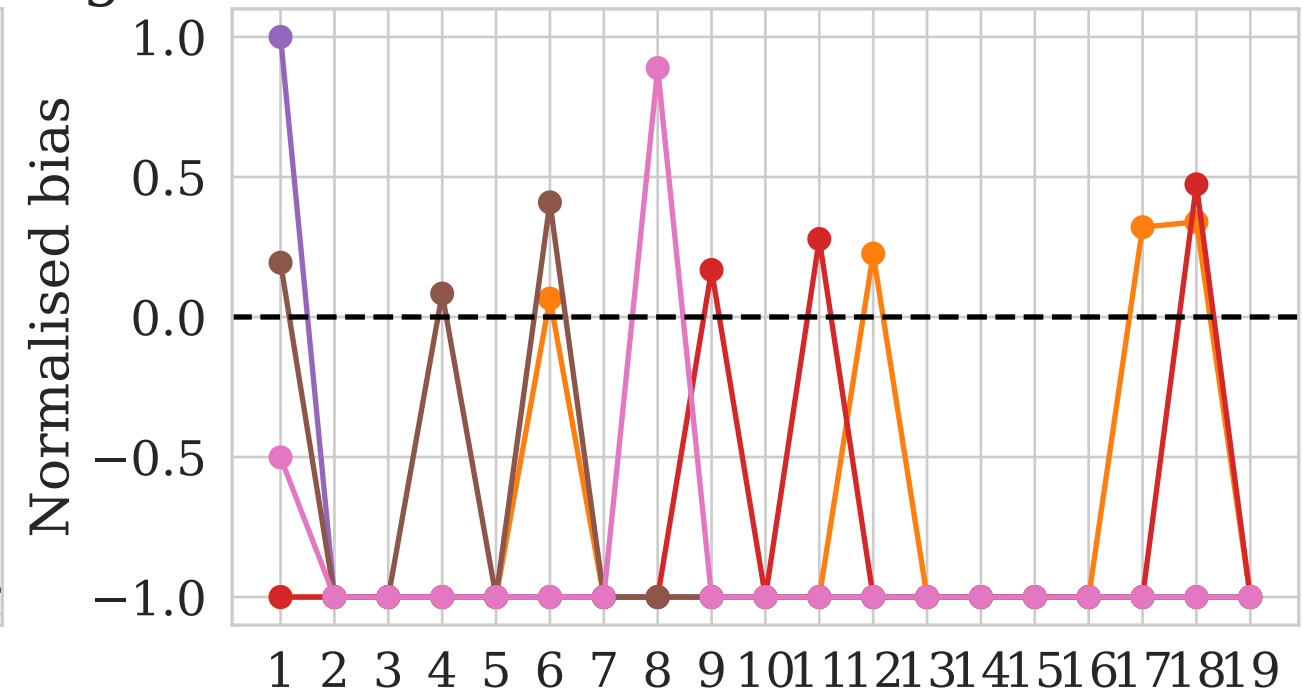

15-uniform hypergraph, number of hyperedges: 6

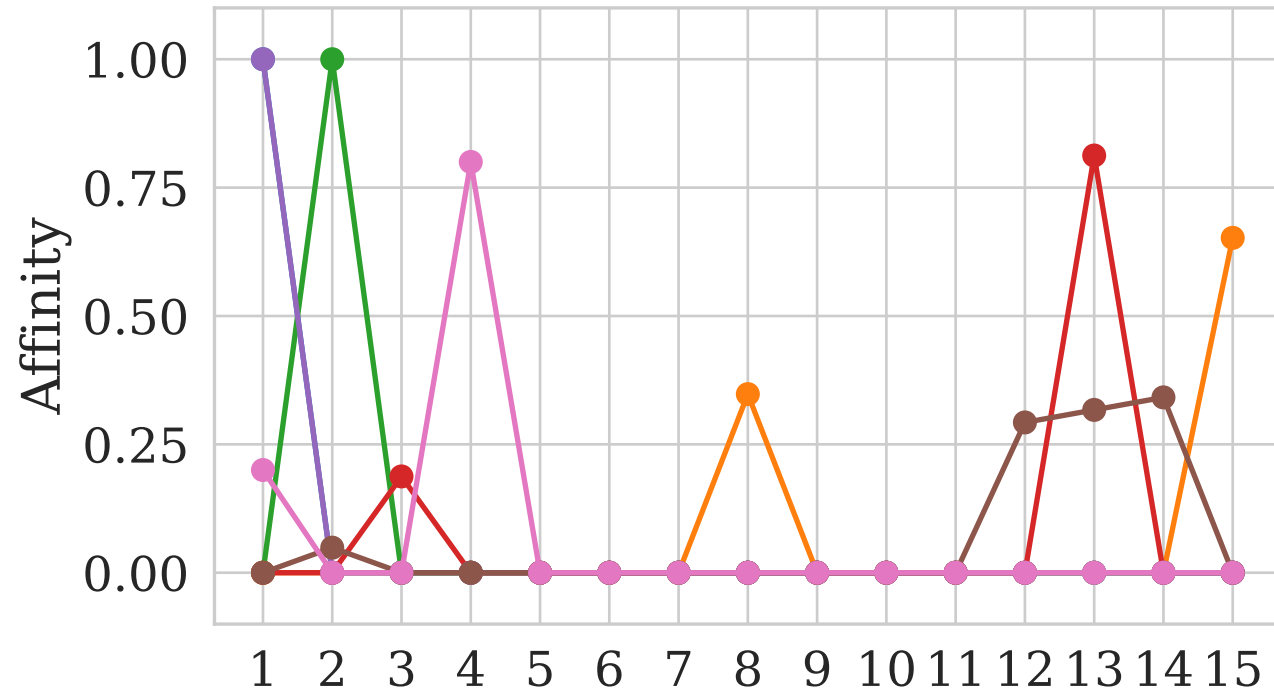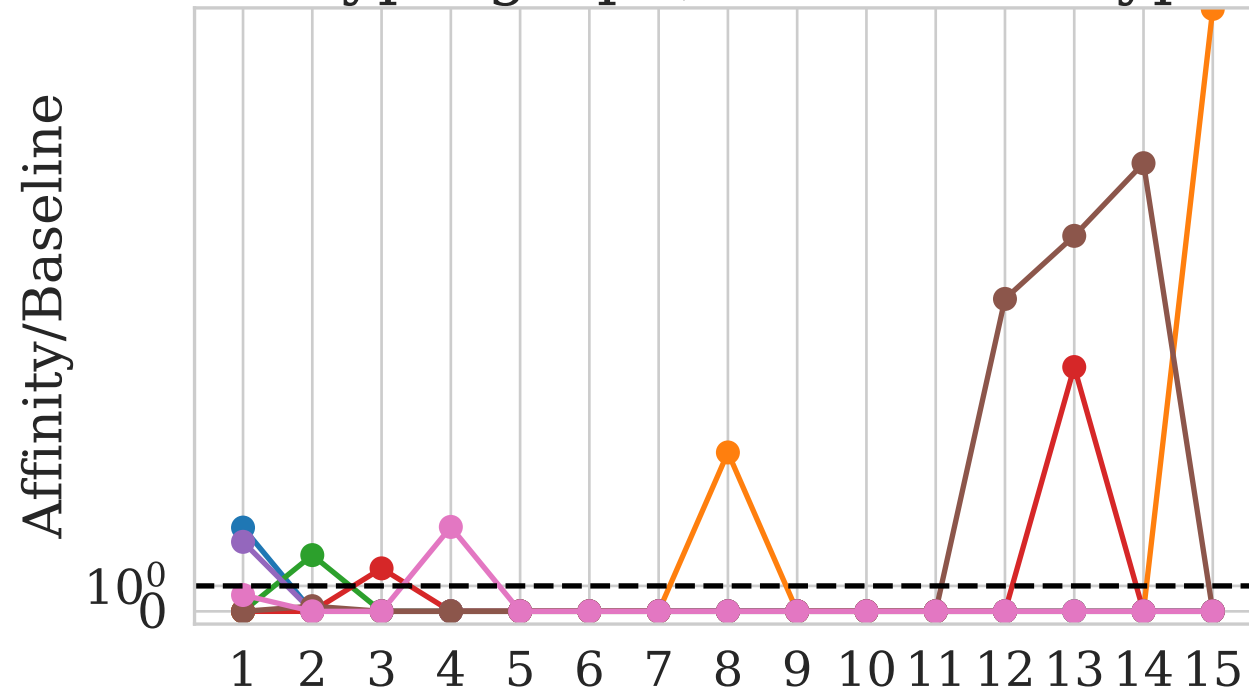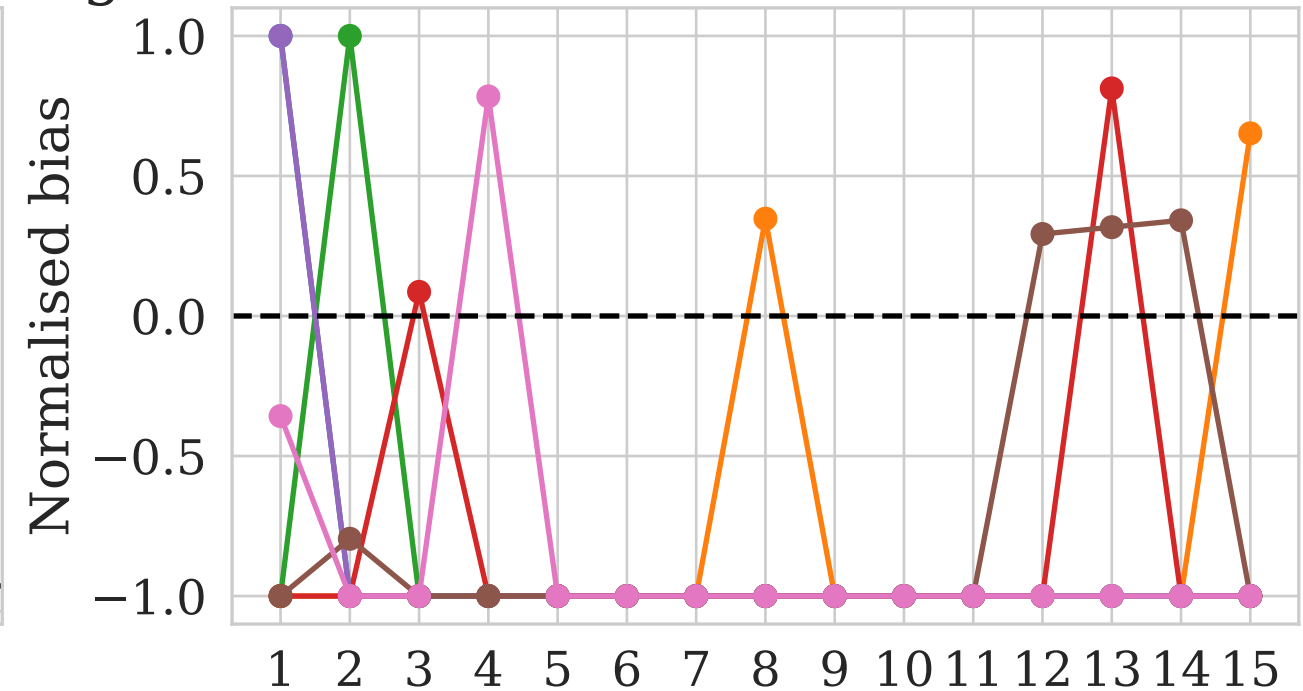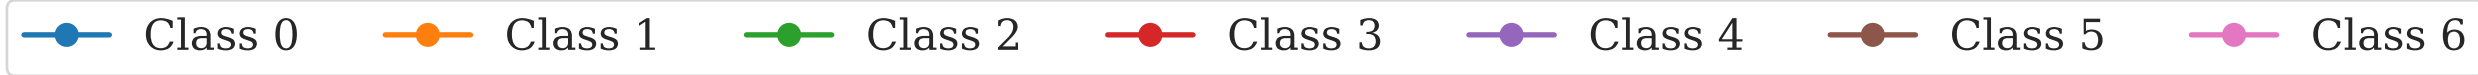

12-uniform hypergraph, number of hyperedges: 6

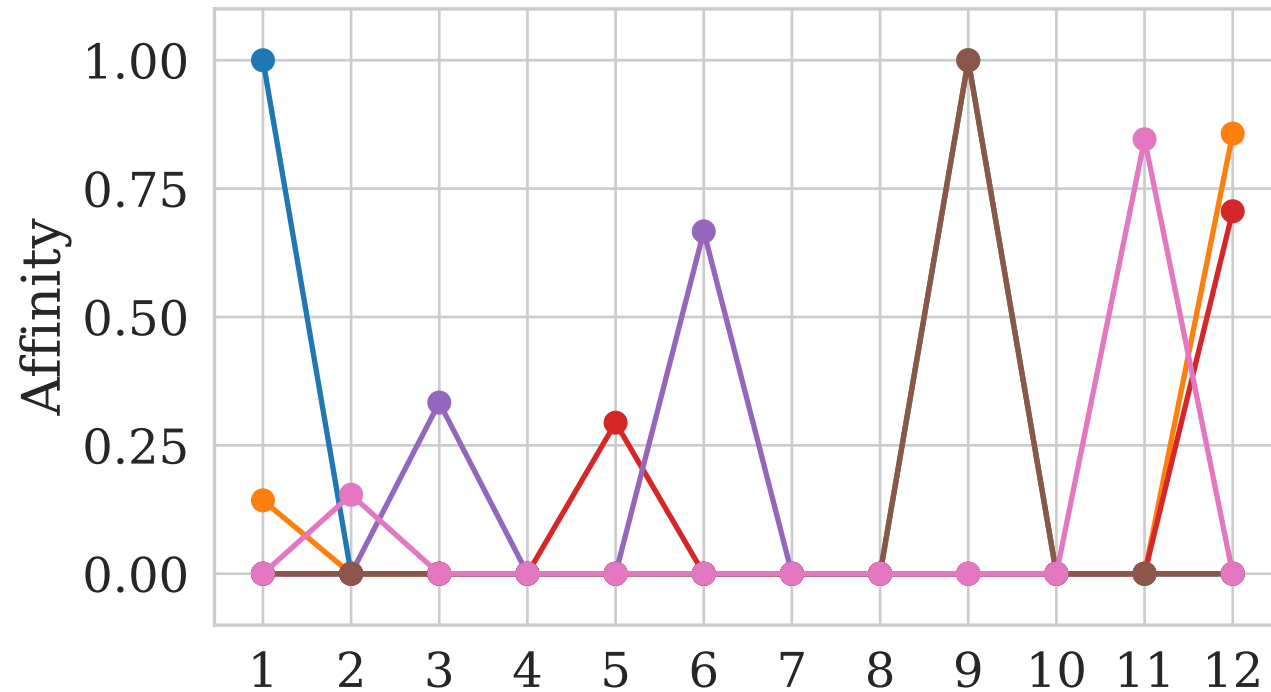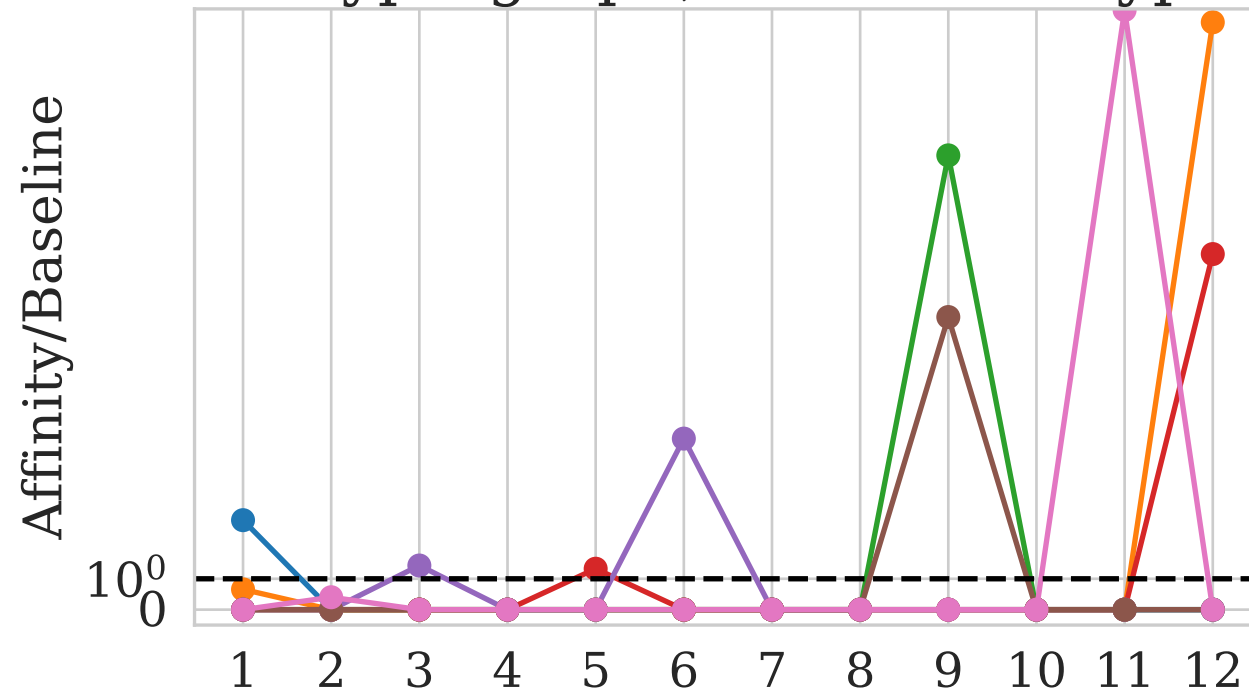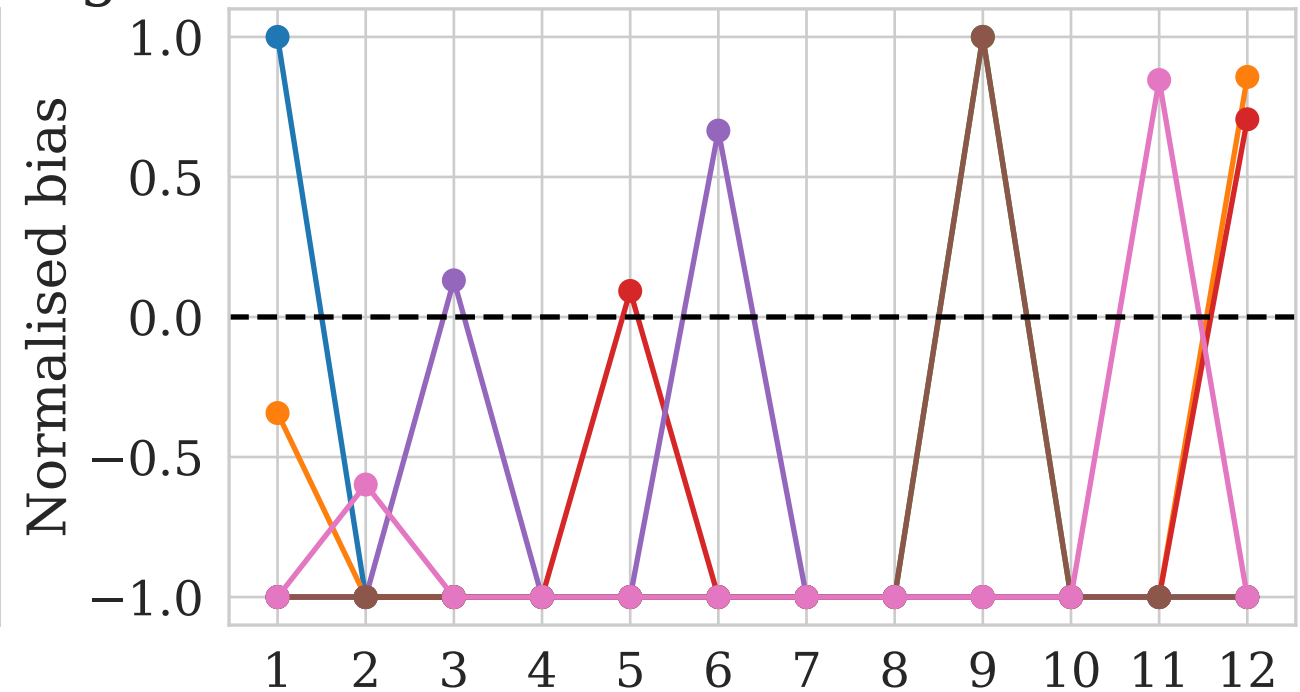

Class 0 Class 1 Class 2 Class 3 Class 4 Class 5 Class 6

21-uniform hypergraph, number of hyperedges: 5

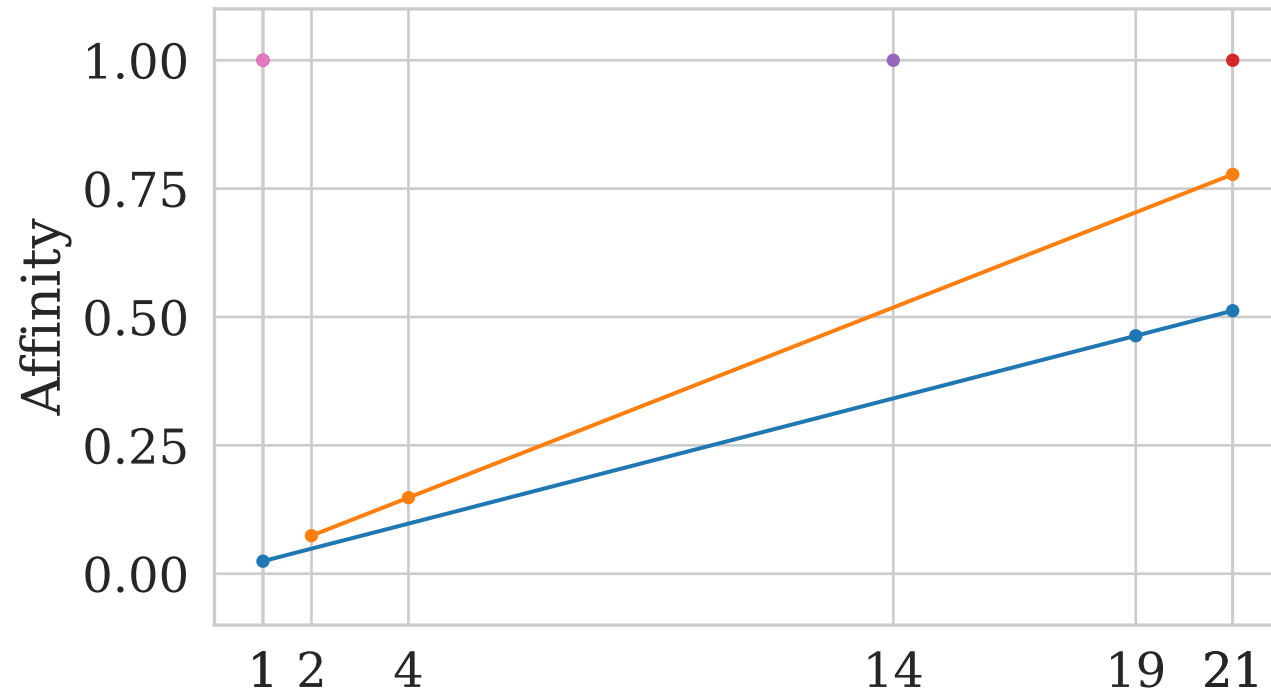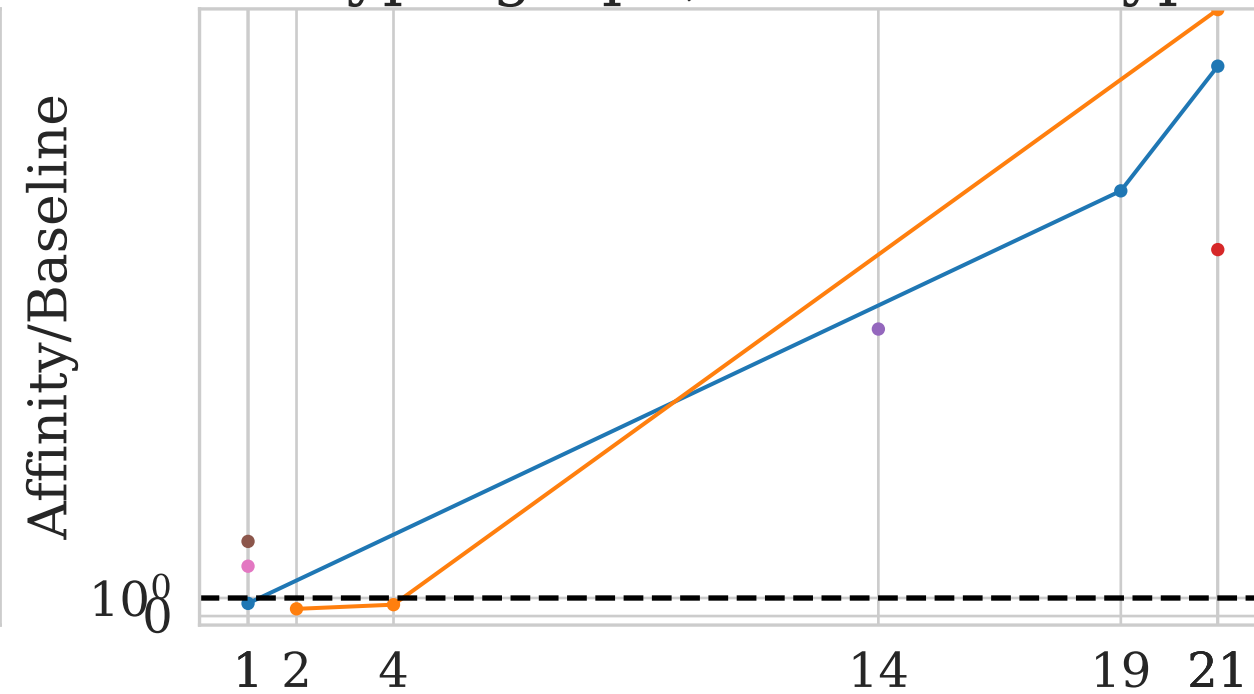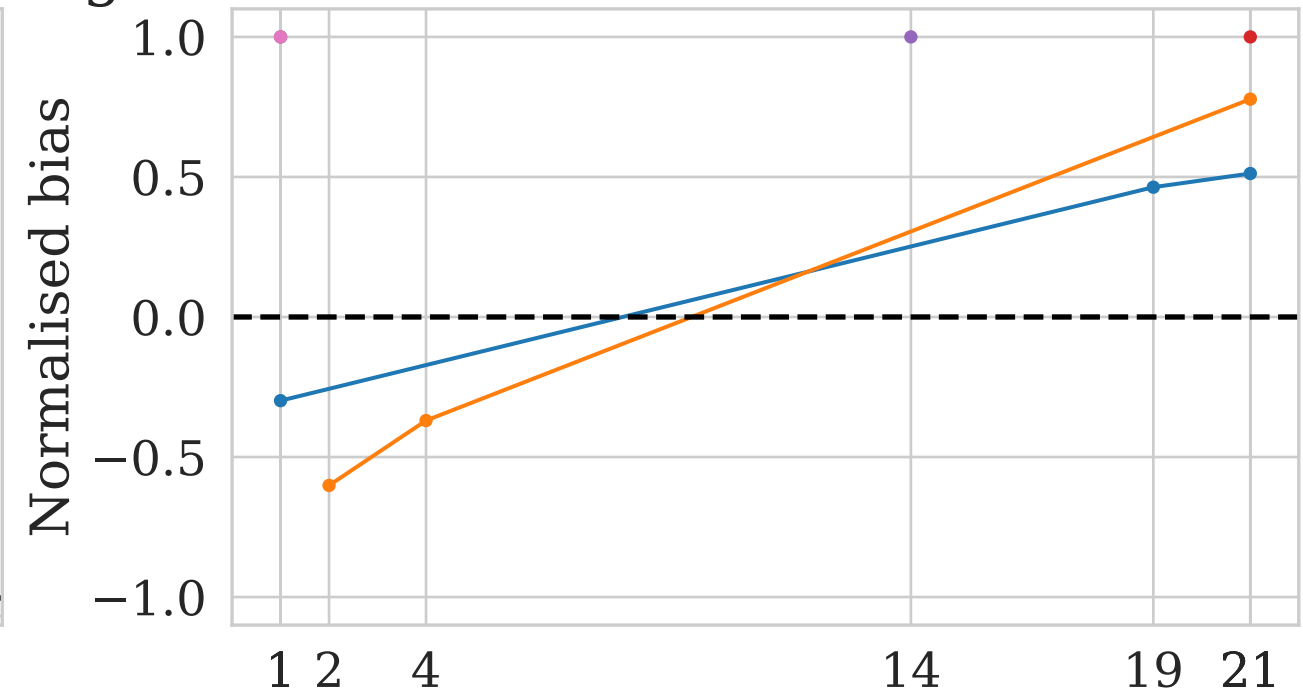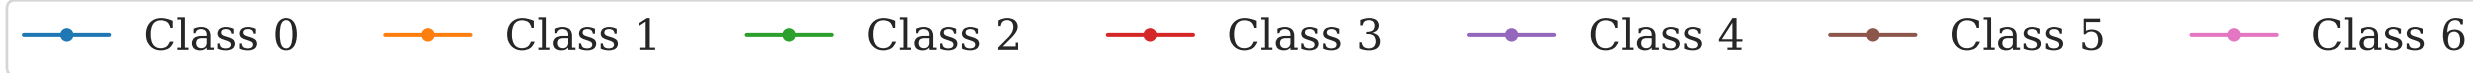



18-uniform hypergraph, number of hyperedges: 4

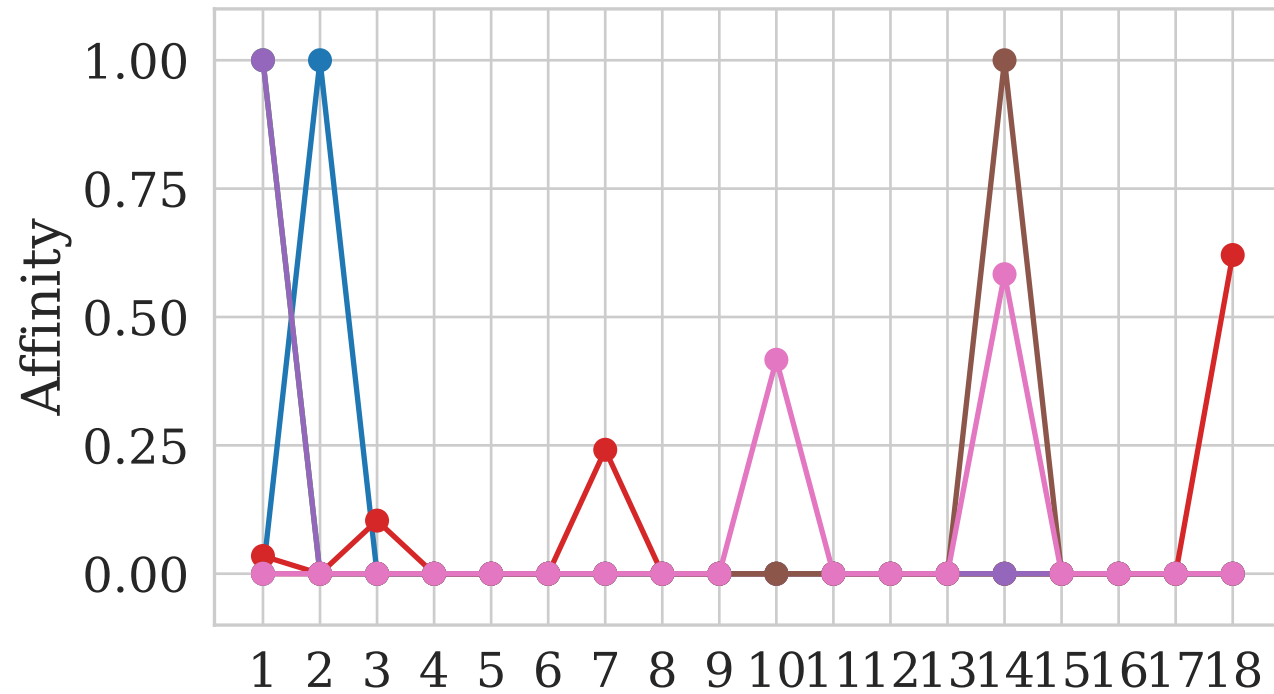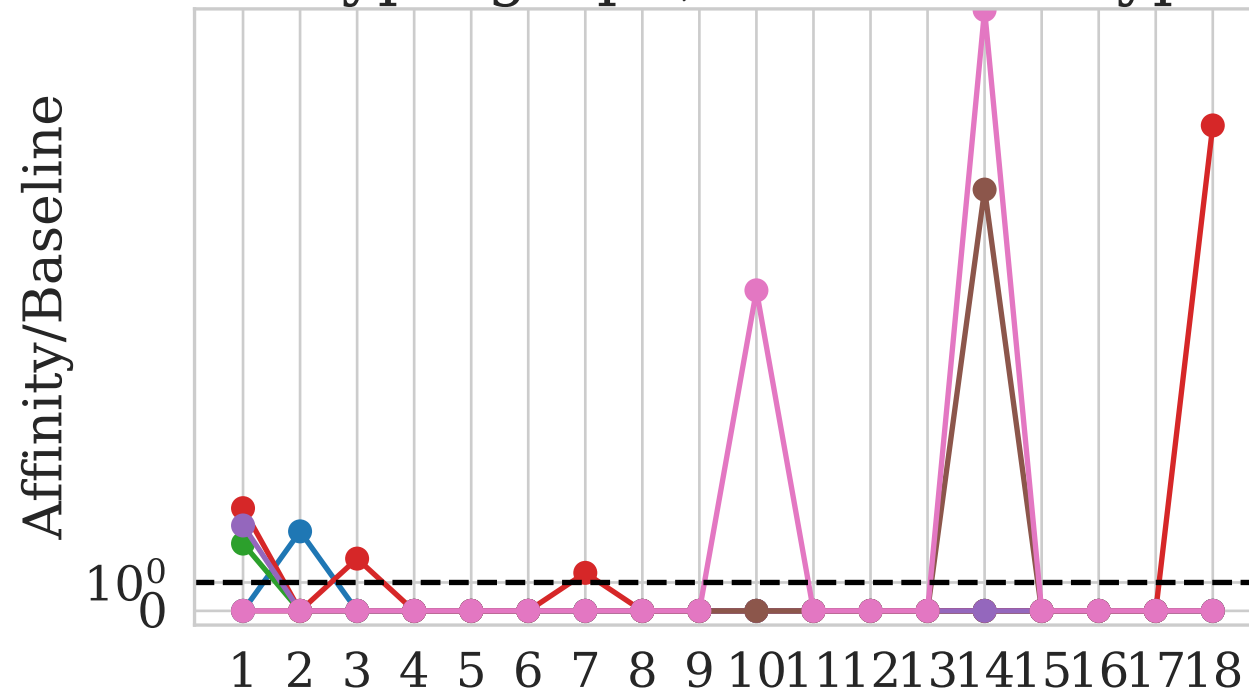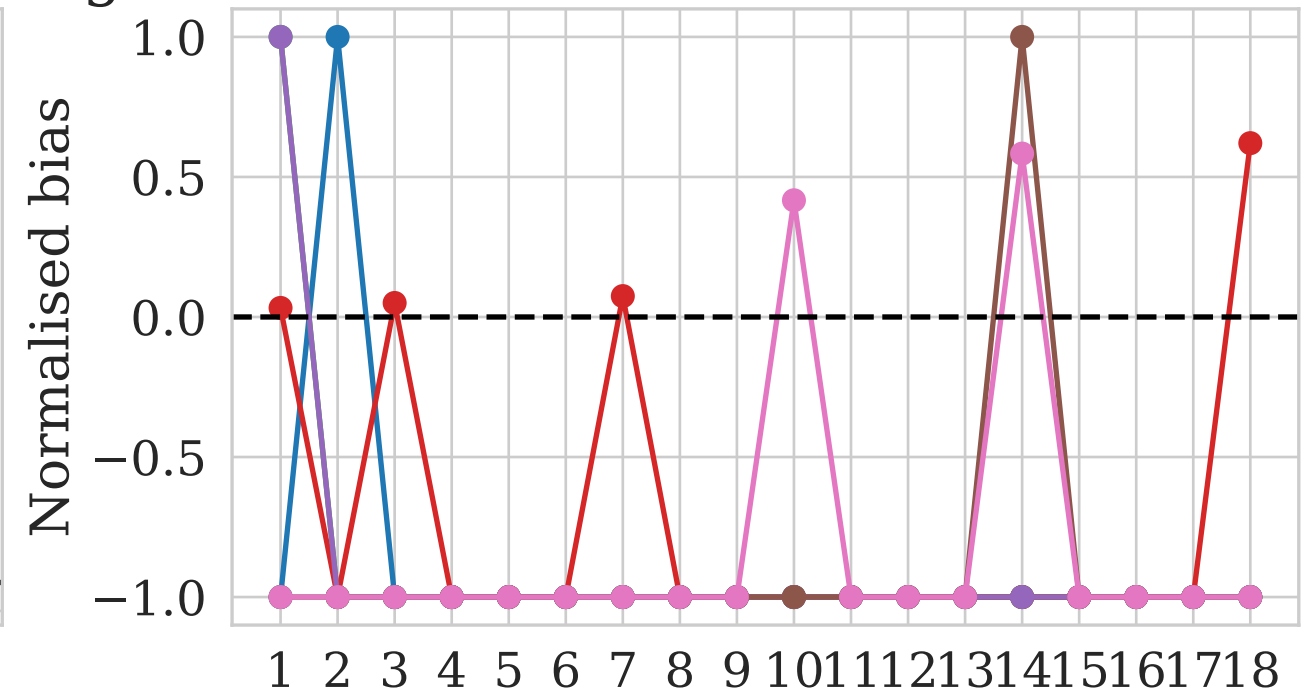

24-uniform hypergraph, number of hyperedges: 4

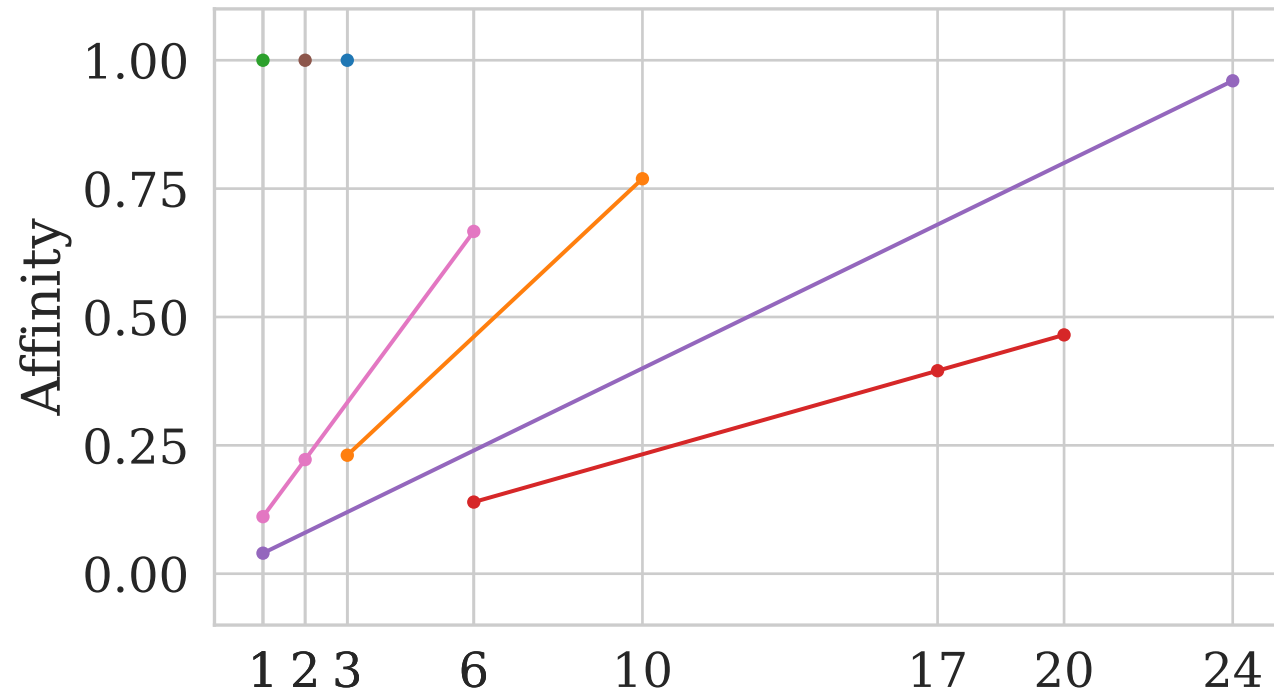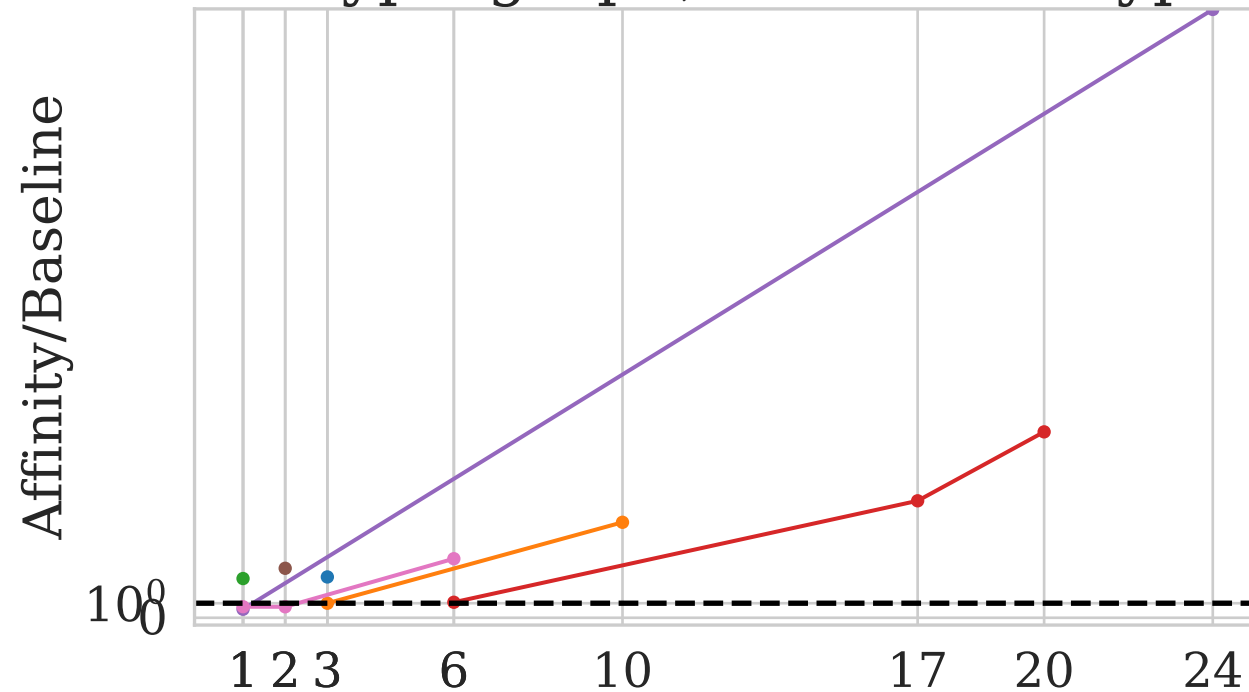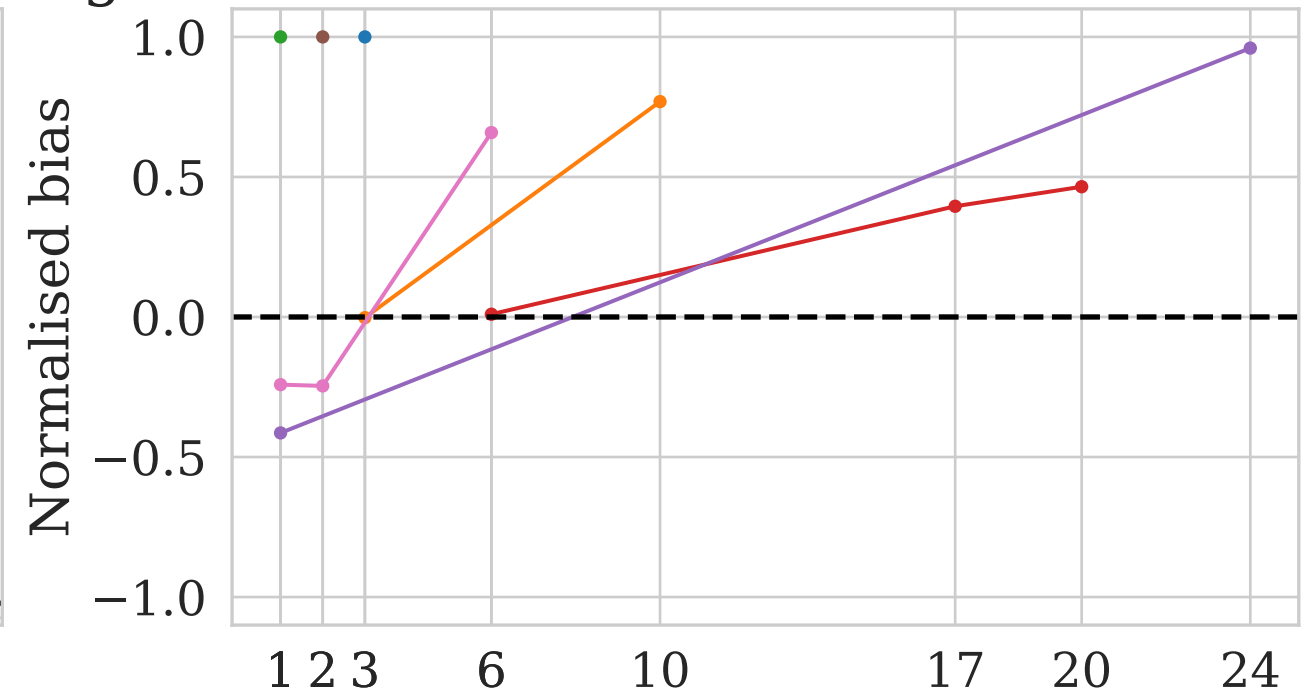

17-uniform hypergraph, number of hyperedges: 2

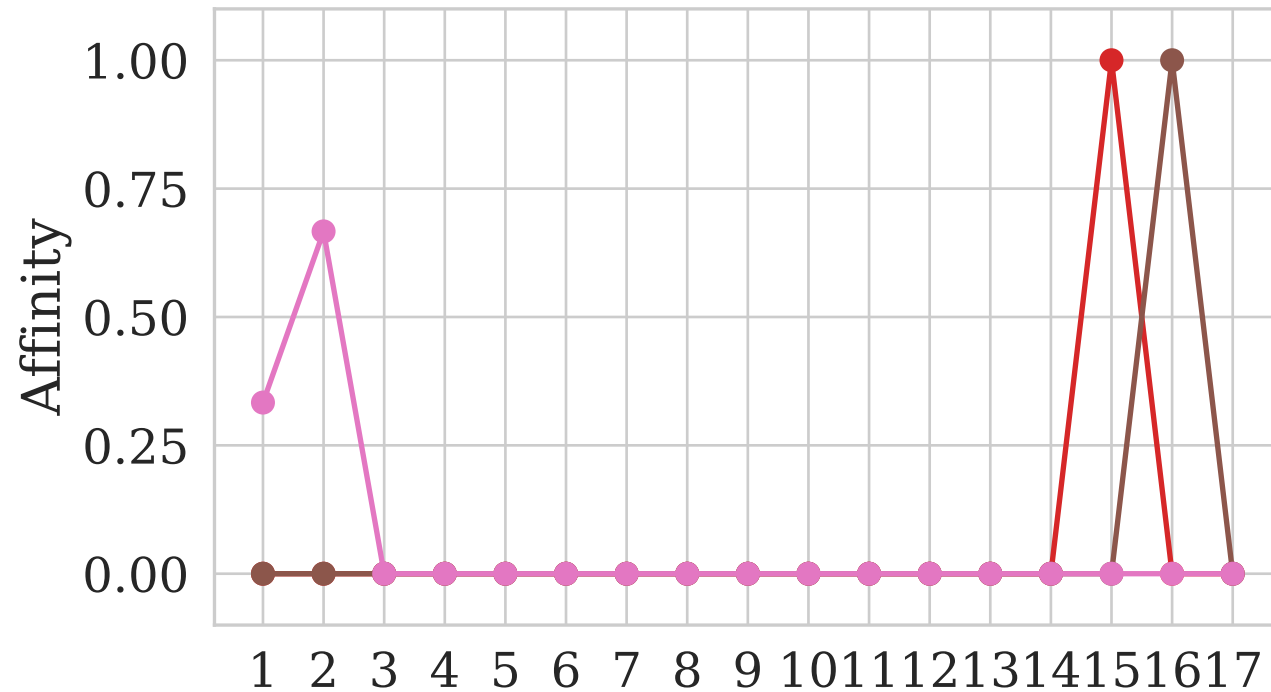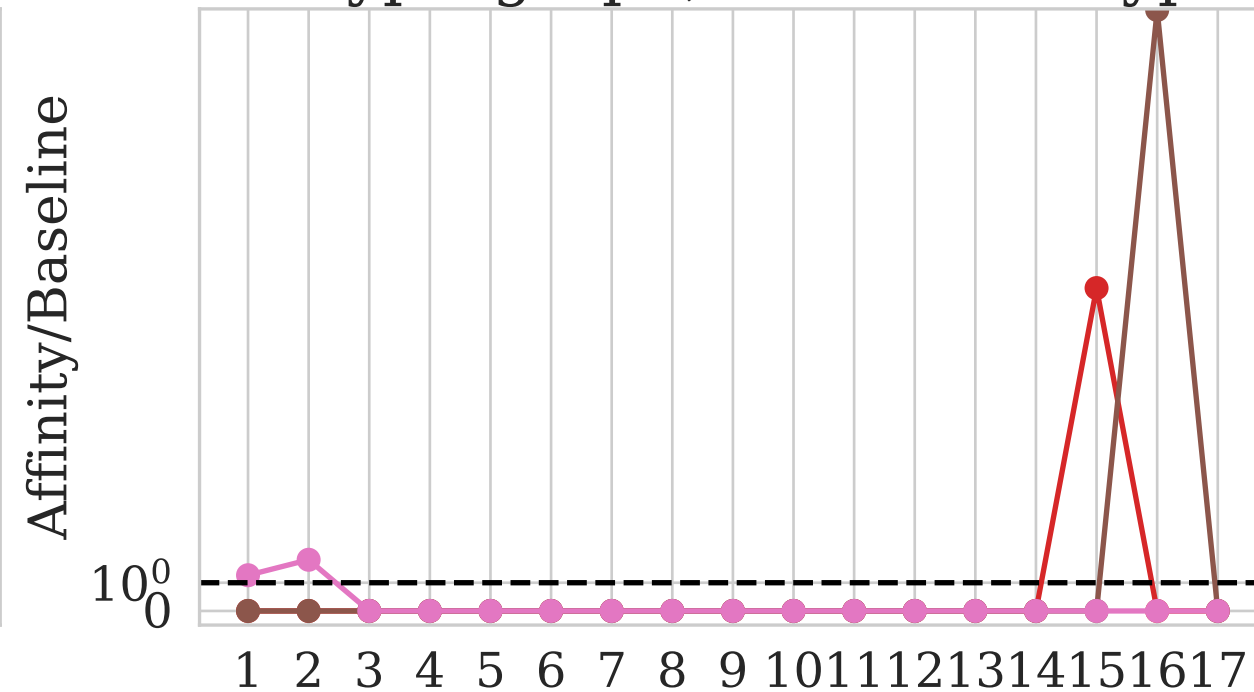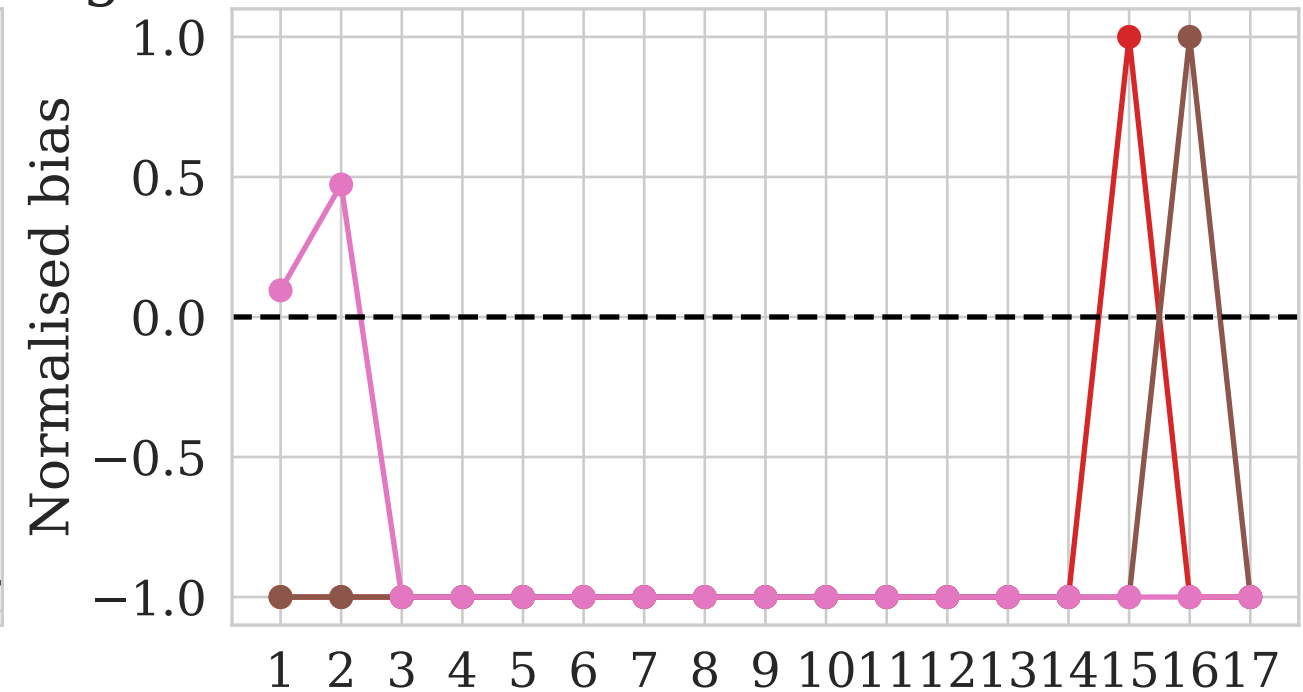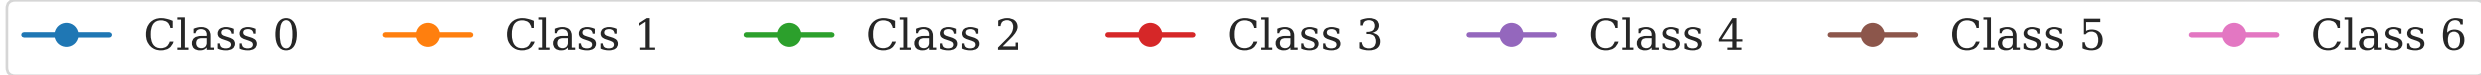

20-uniform hypergraph, number of hyperedges: 2

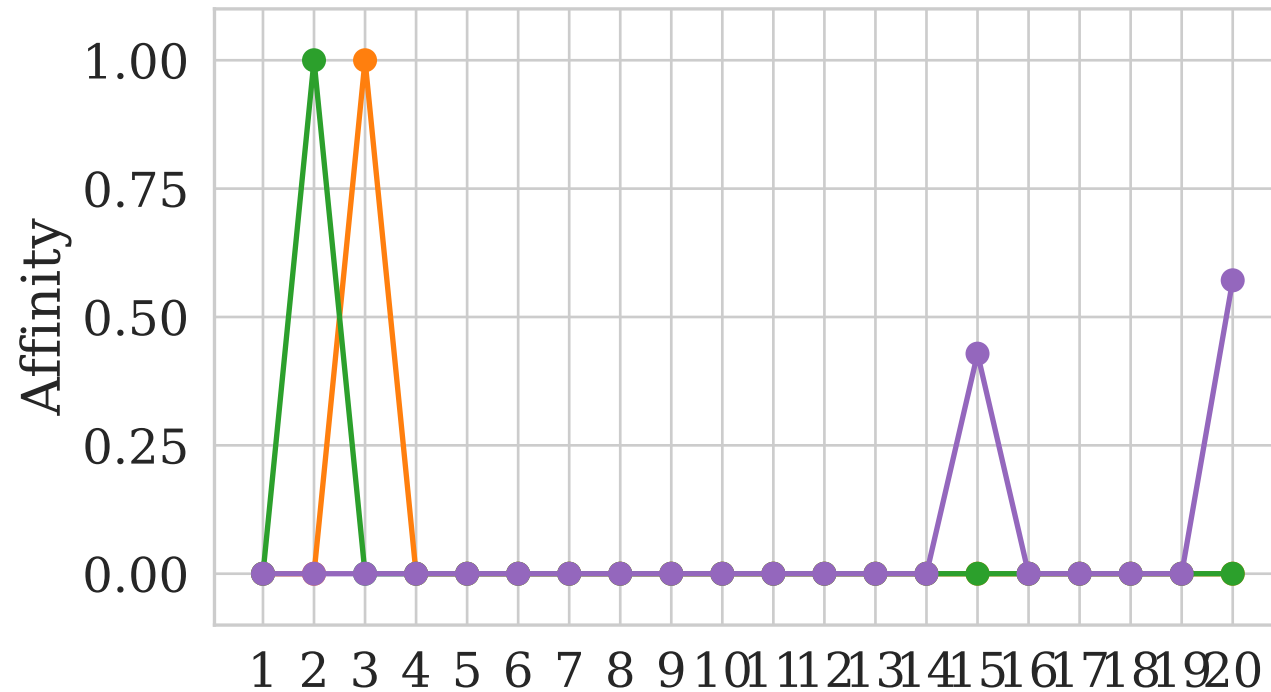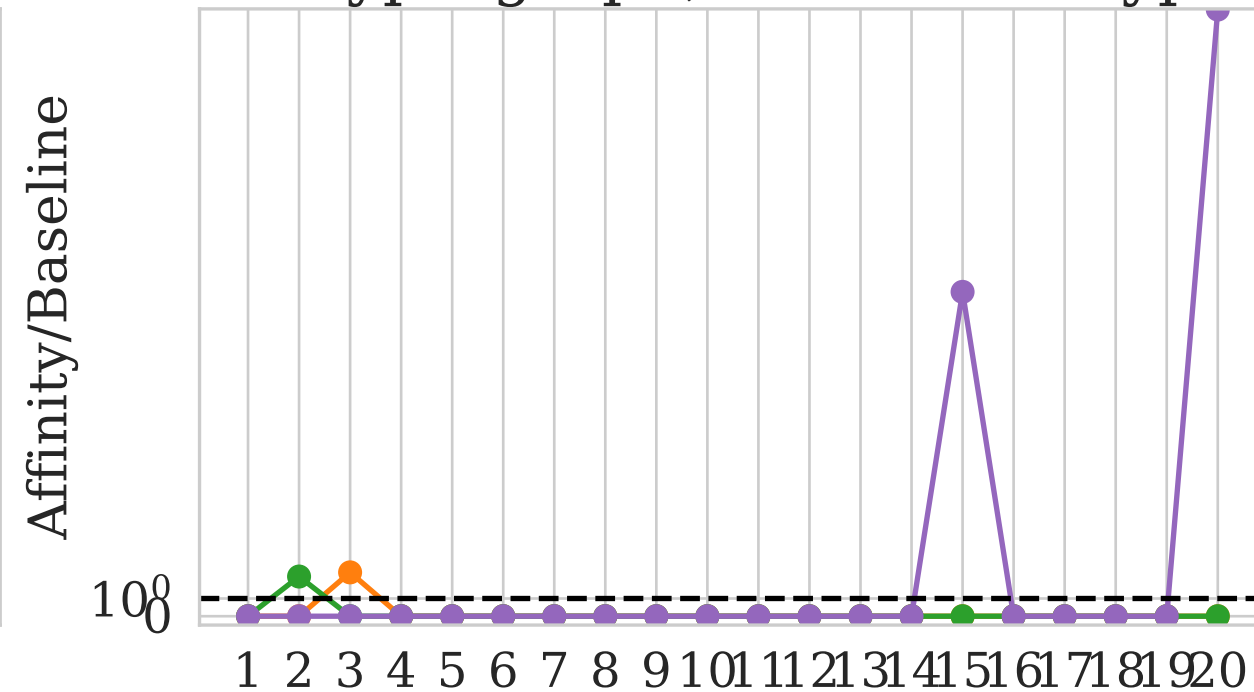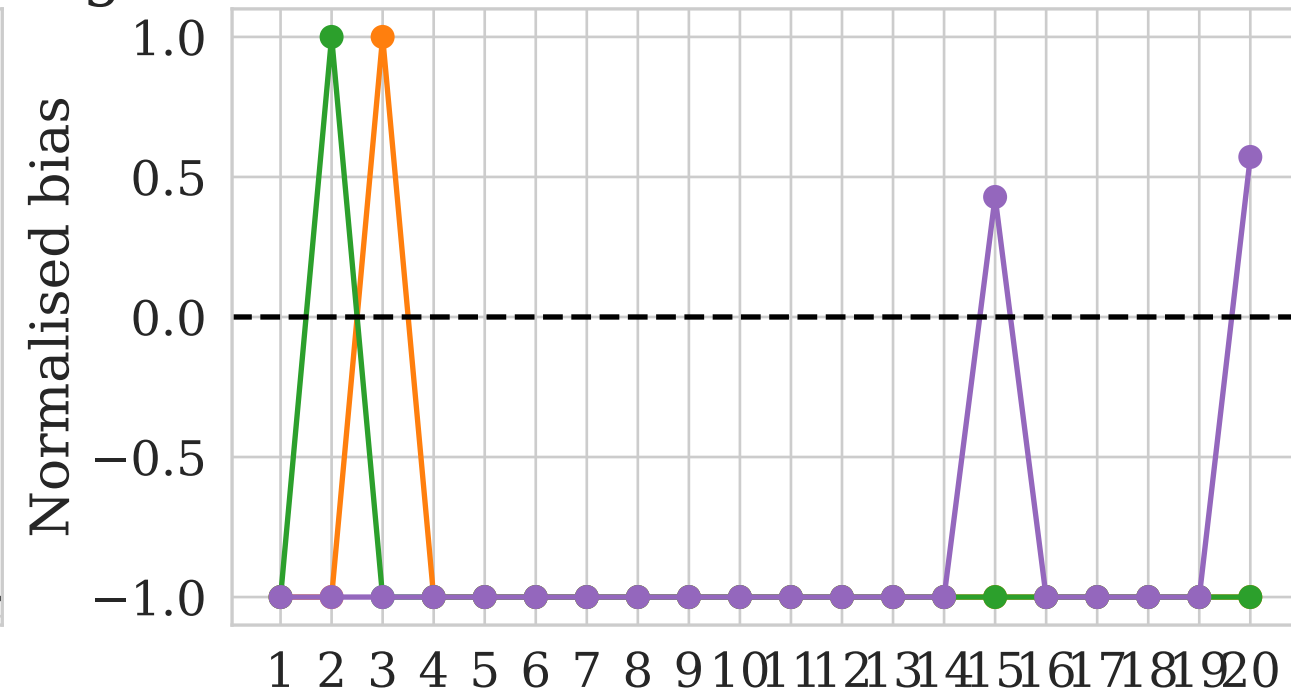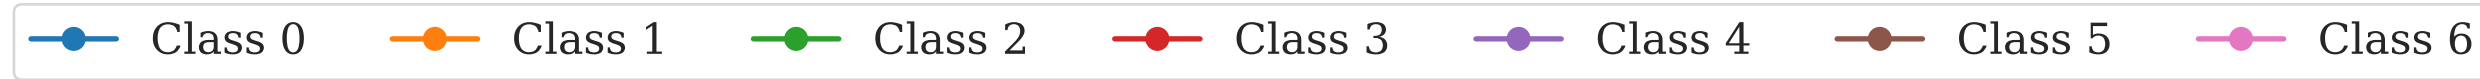

43-uniform hypergraph, number of hyperedges: 1

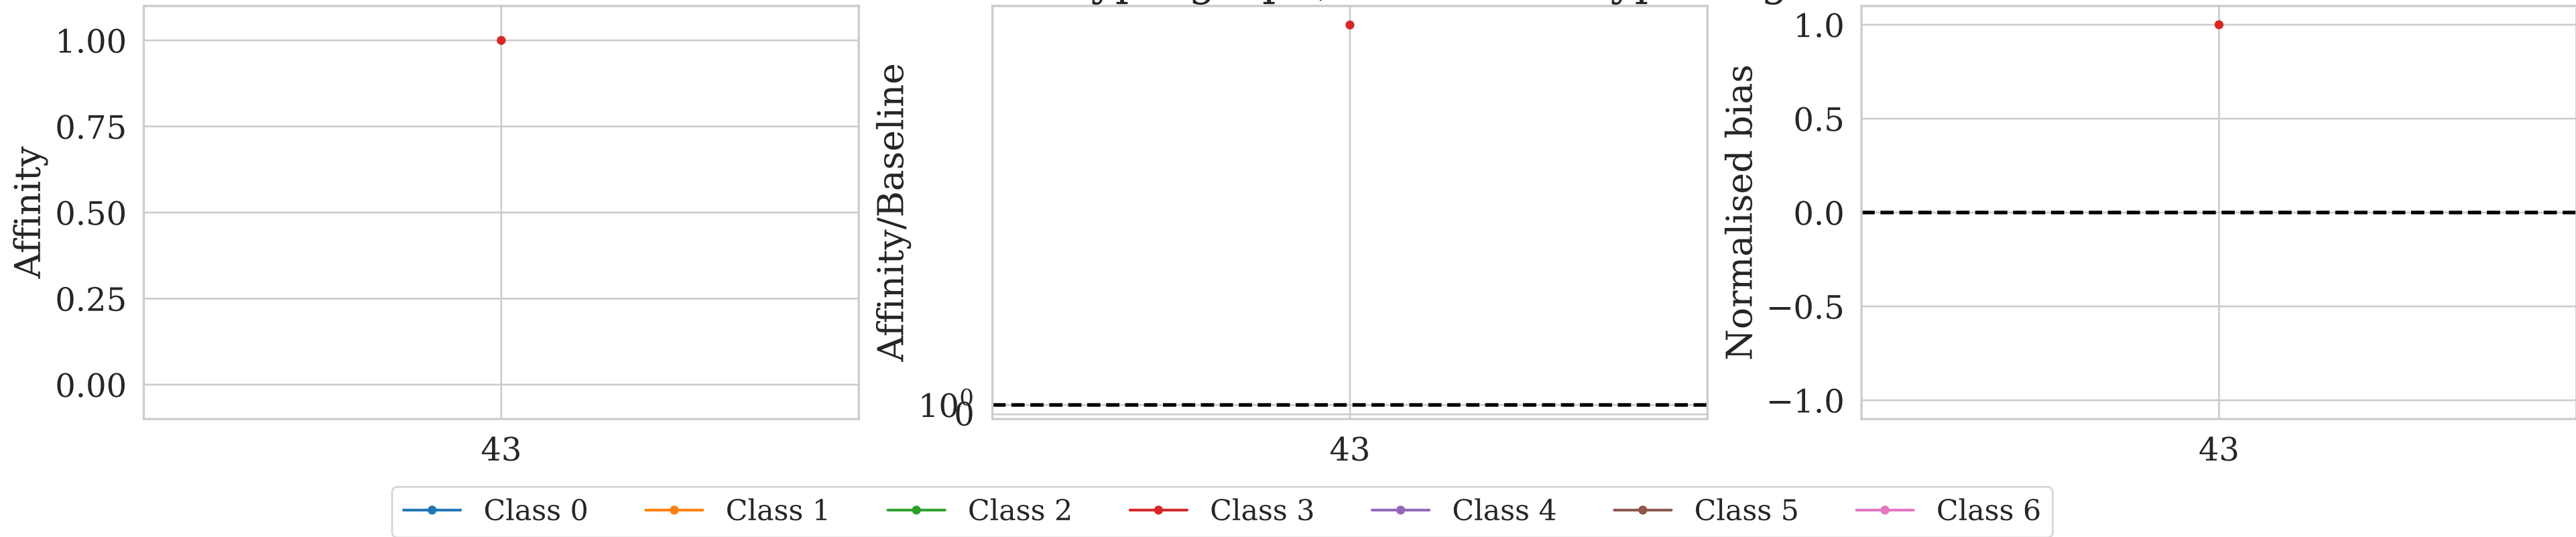

32-uniform hypergraph, number of hyperedges: 1

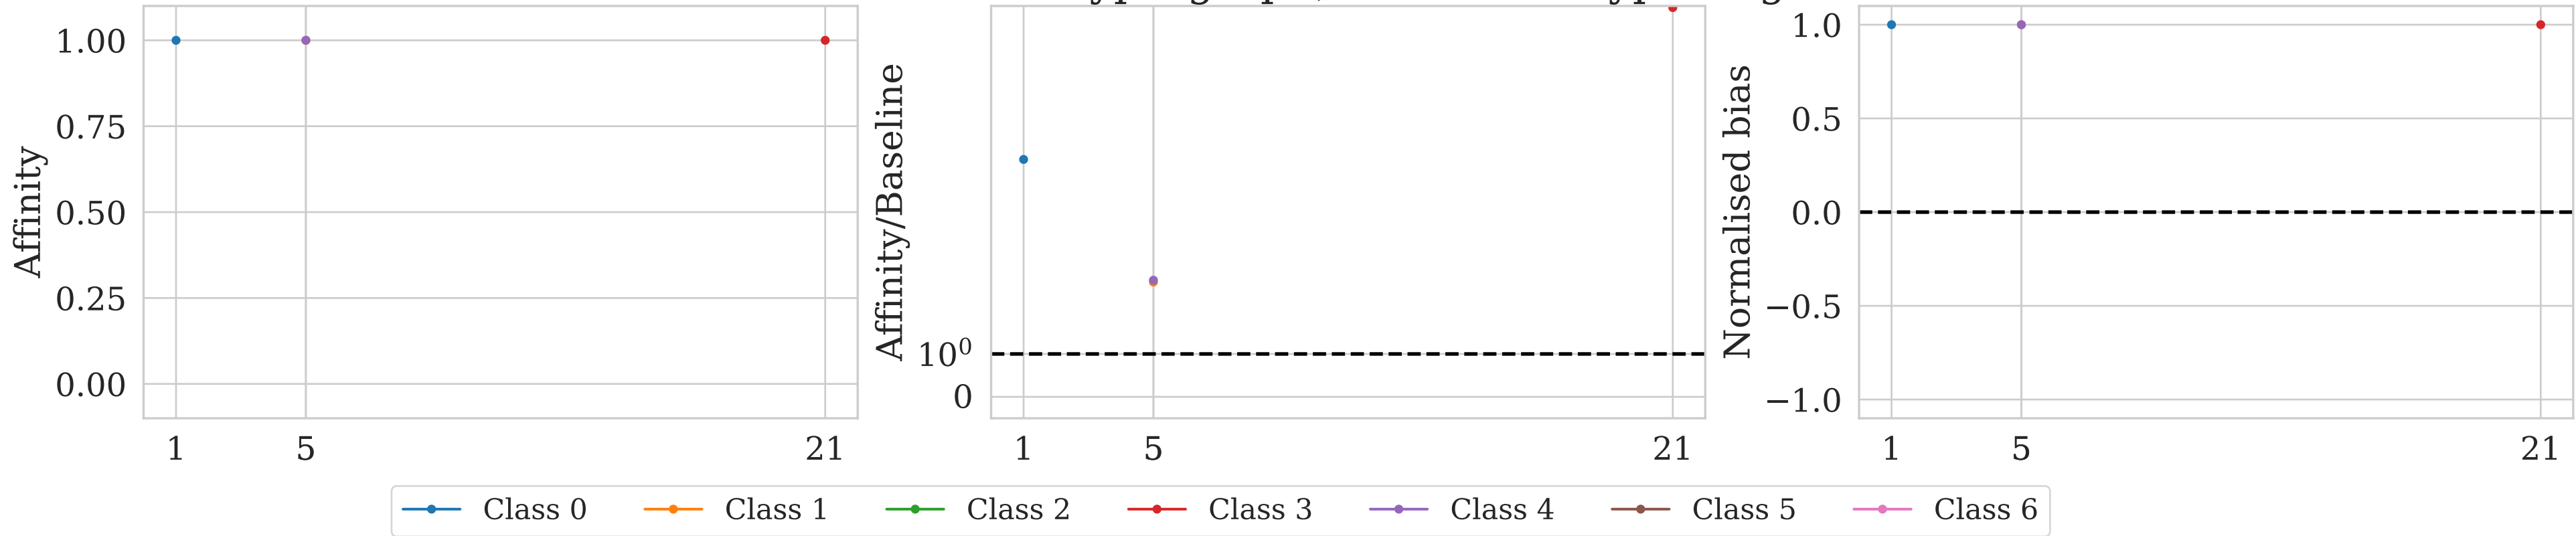

22-uniform hypergraph, number of hyperedges: 1

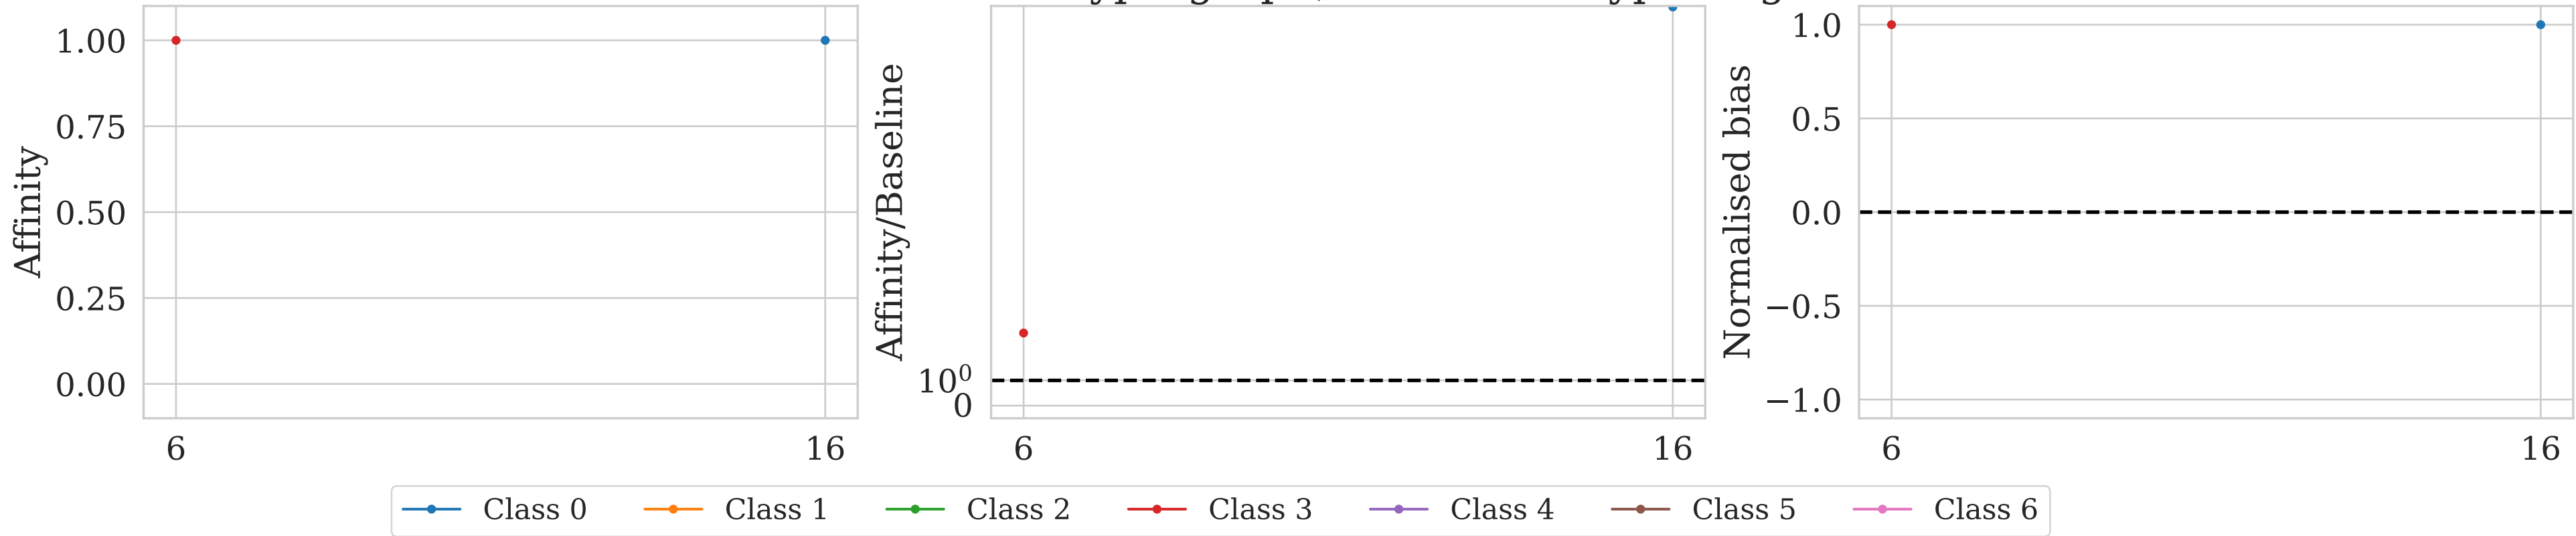

26-uniform hypergraph, number of hyperedges: 1

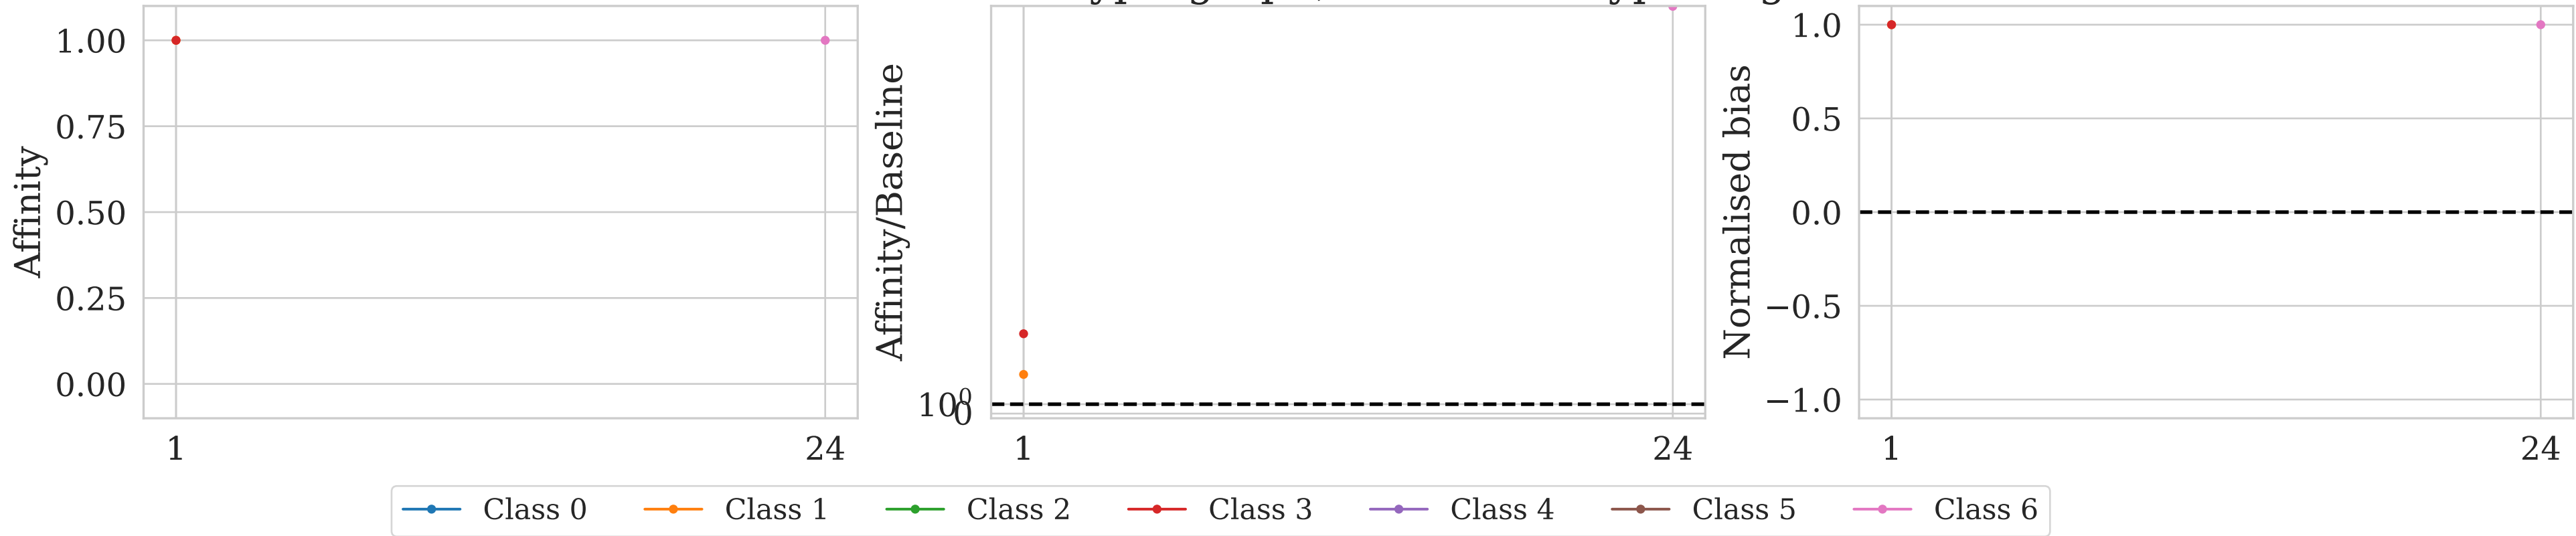



27-uniform hypergraph, number of hyperedges: 1

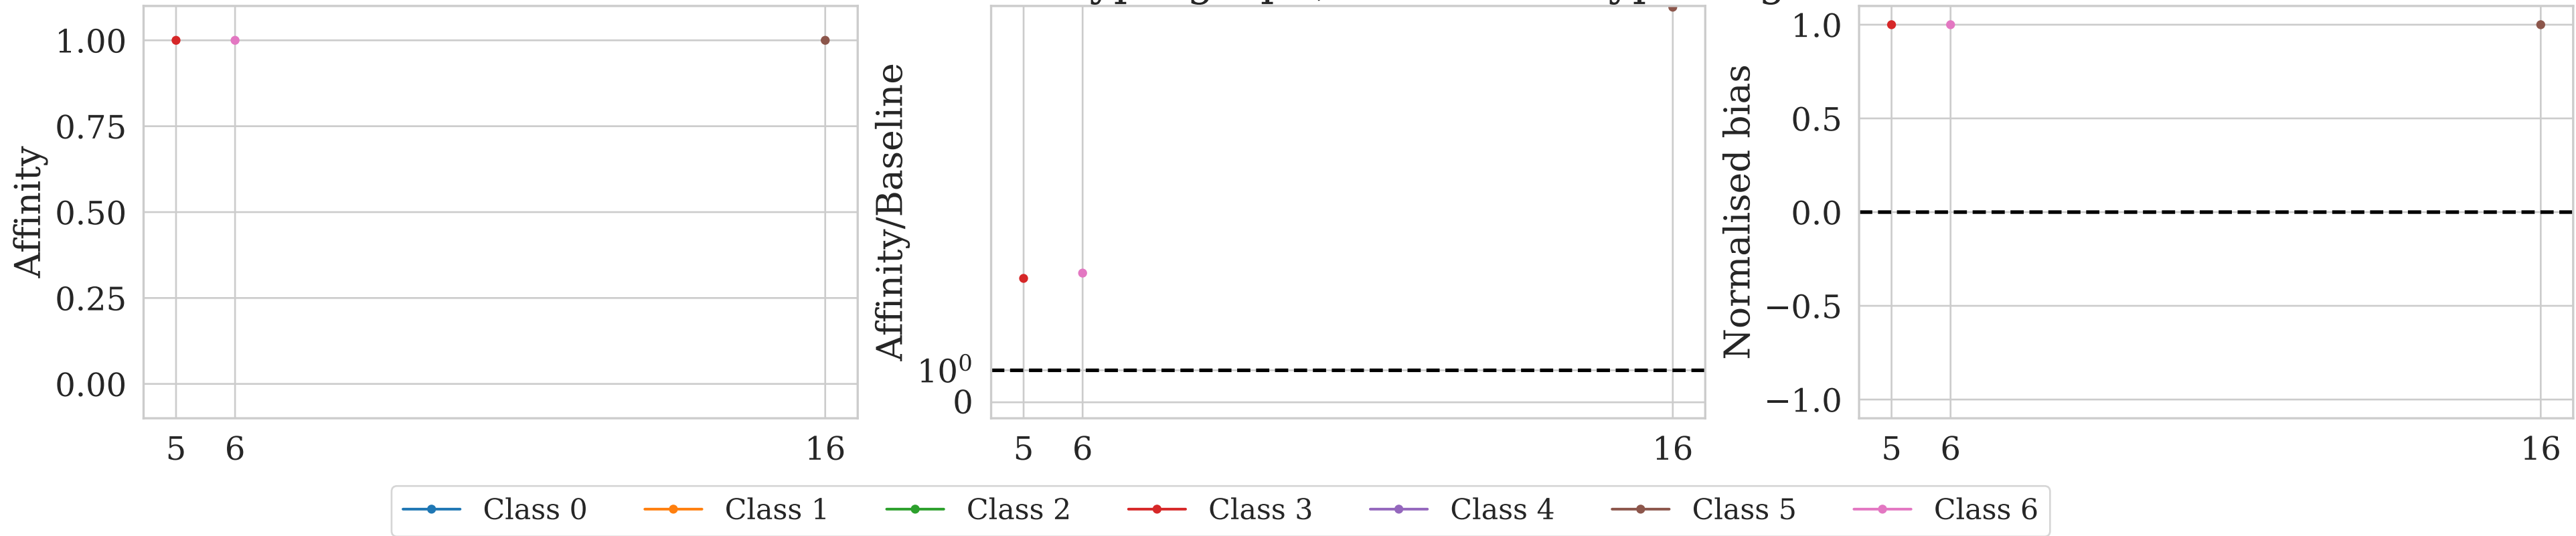

28-uniform hypergraph, number of hyperedges: 1

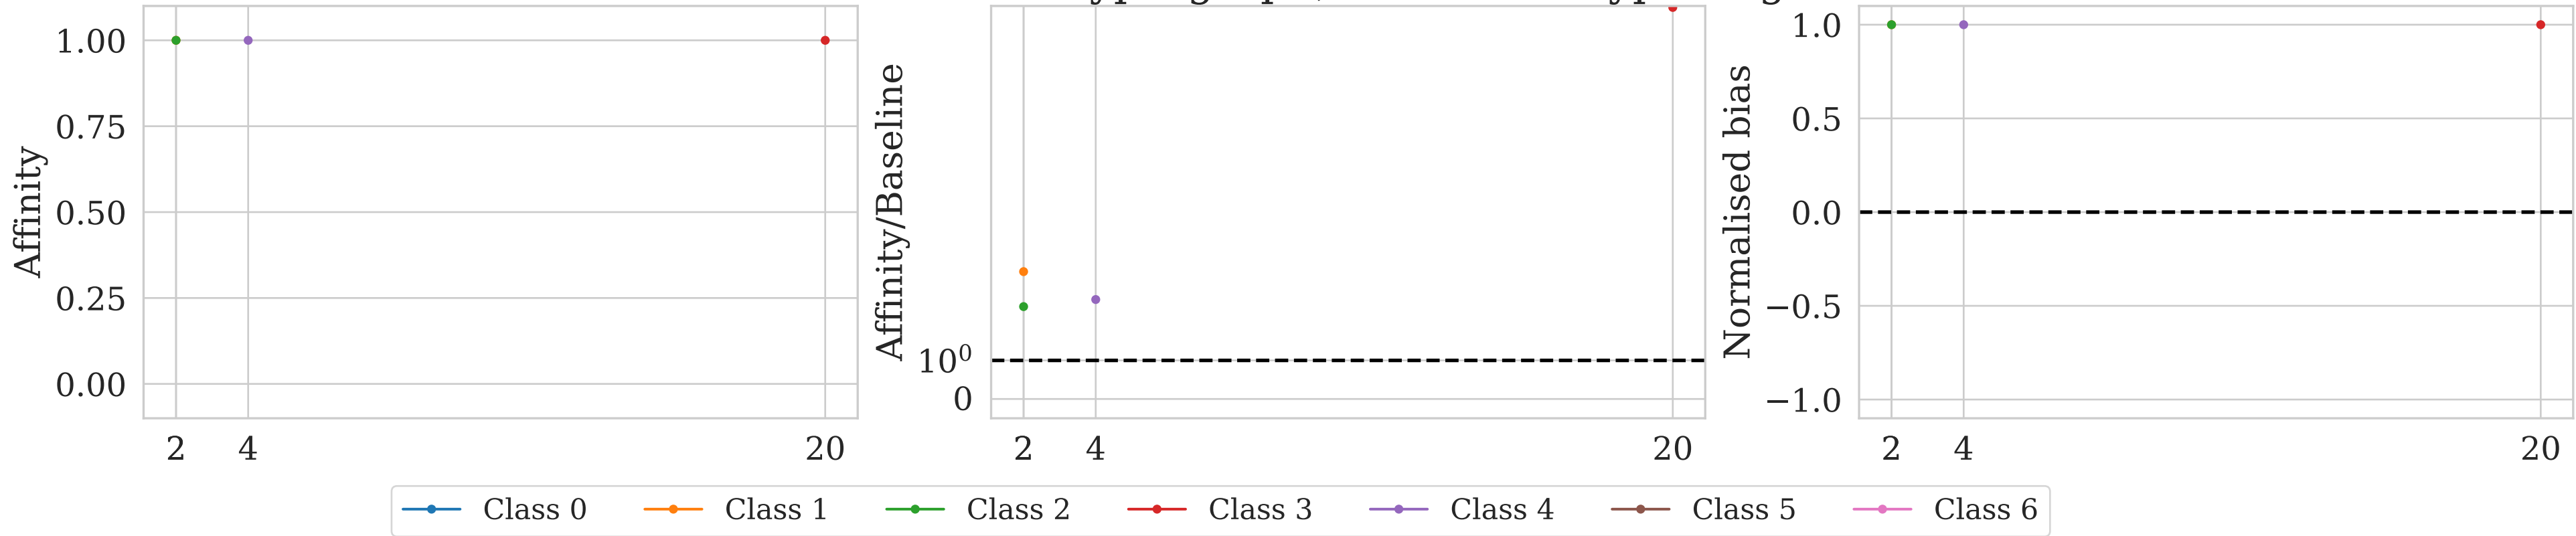

30-uniform hypergraph, number of hyperedges: 1

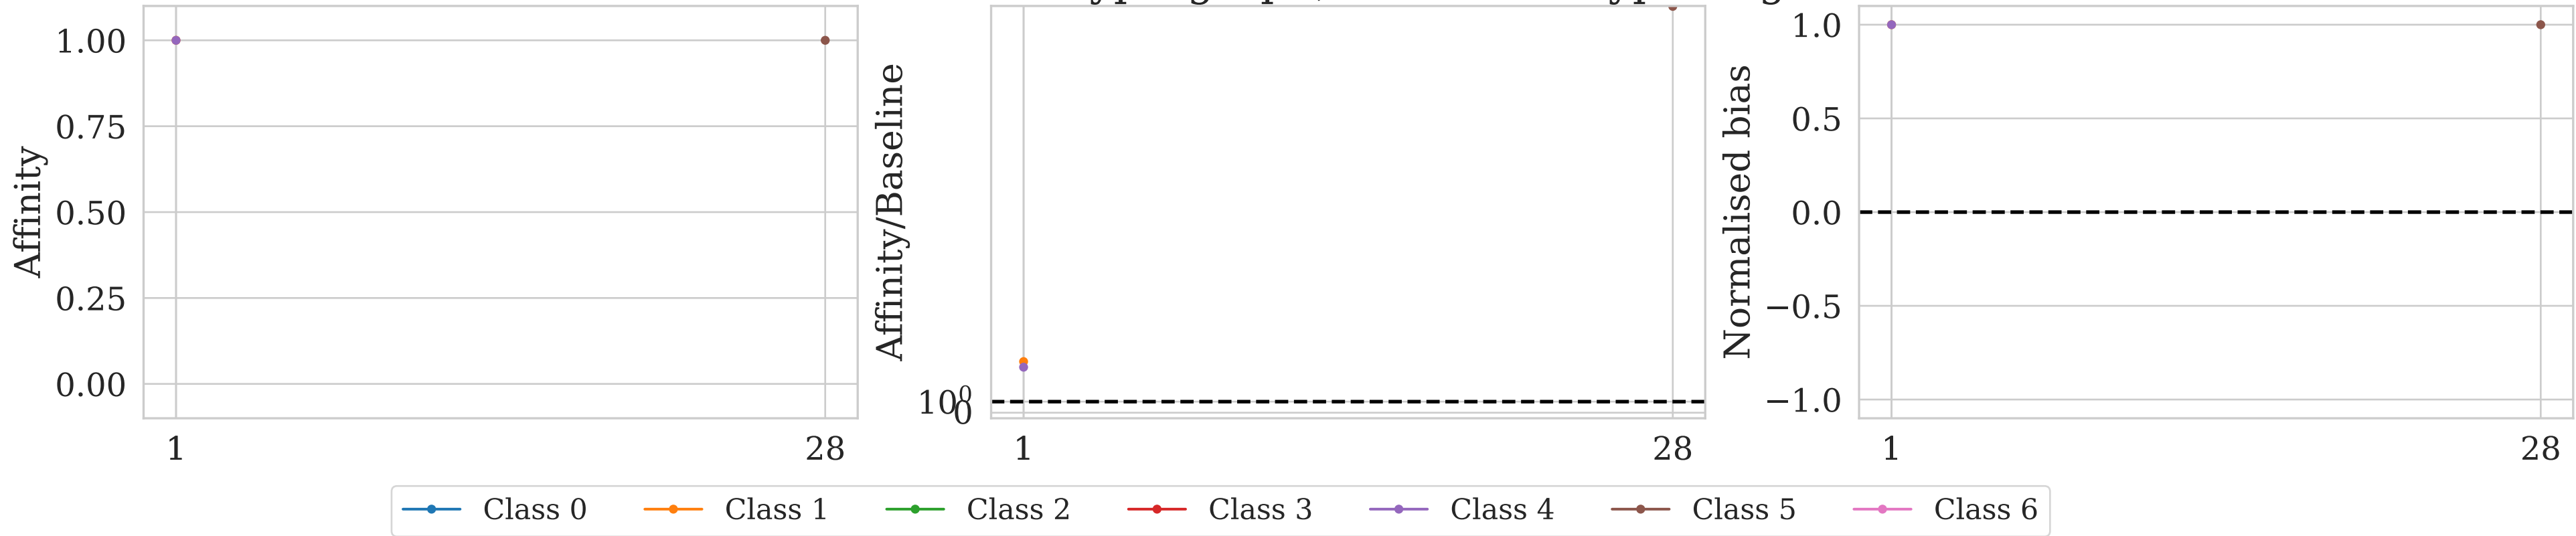

31-uniform hypergraph, number of hyperedges: 1

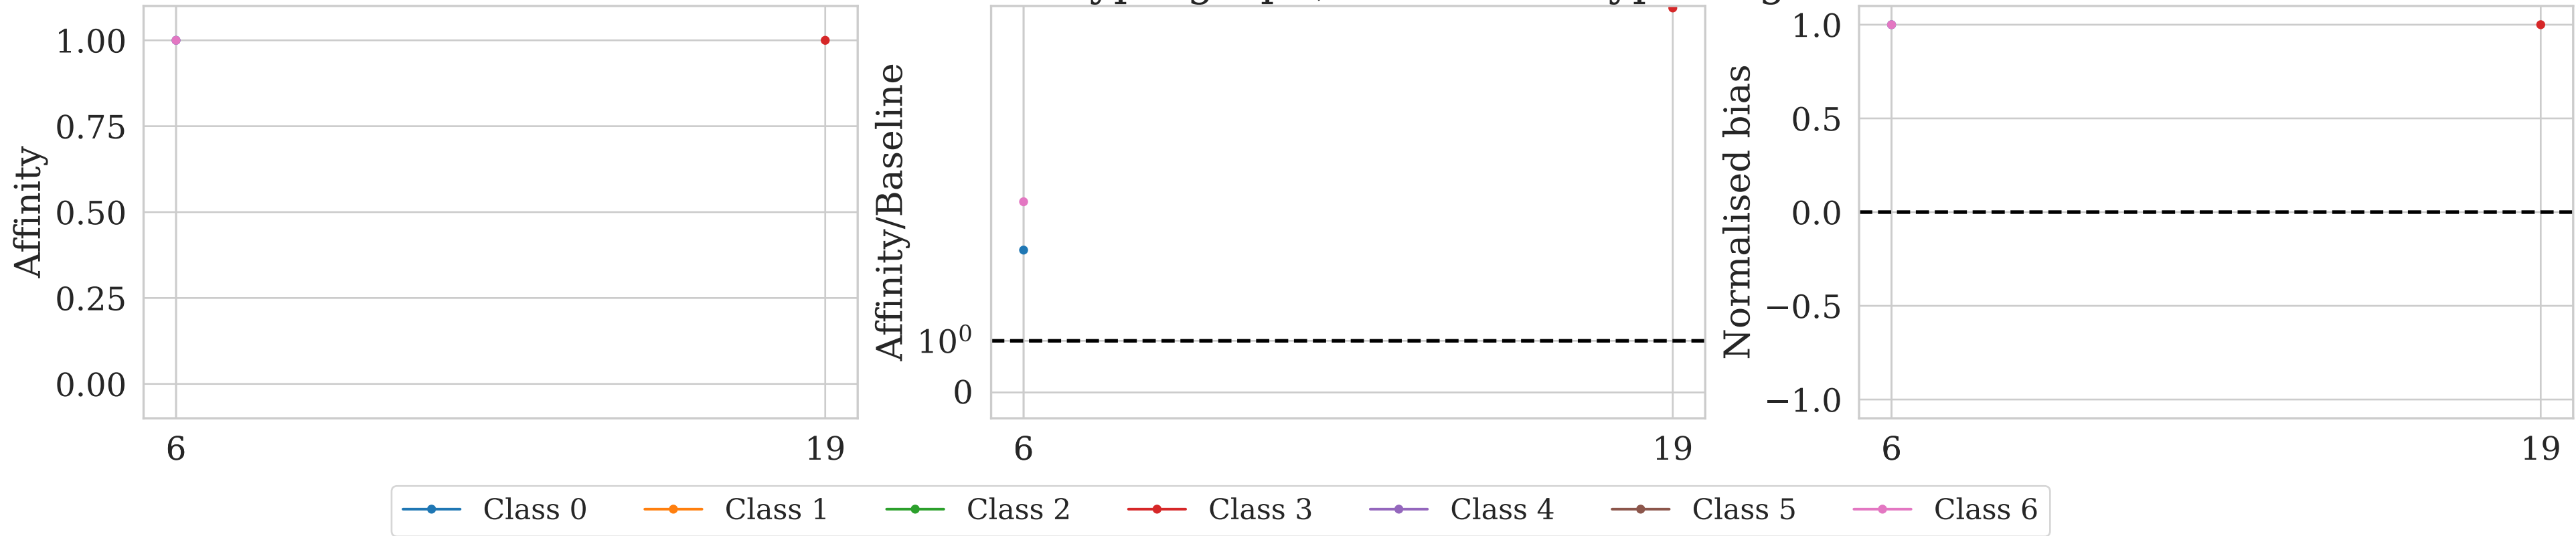

16-uniform hypergraph, number of hyperedges: 1

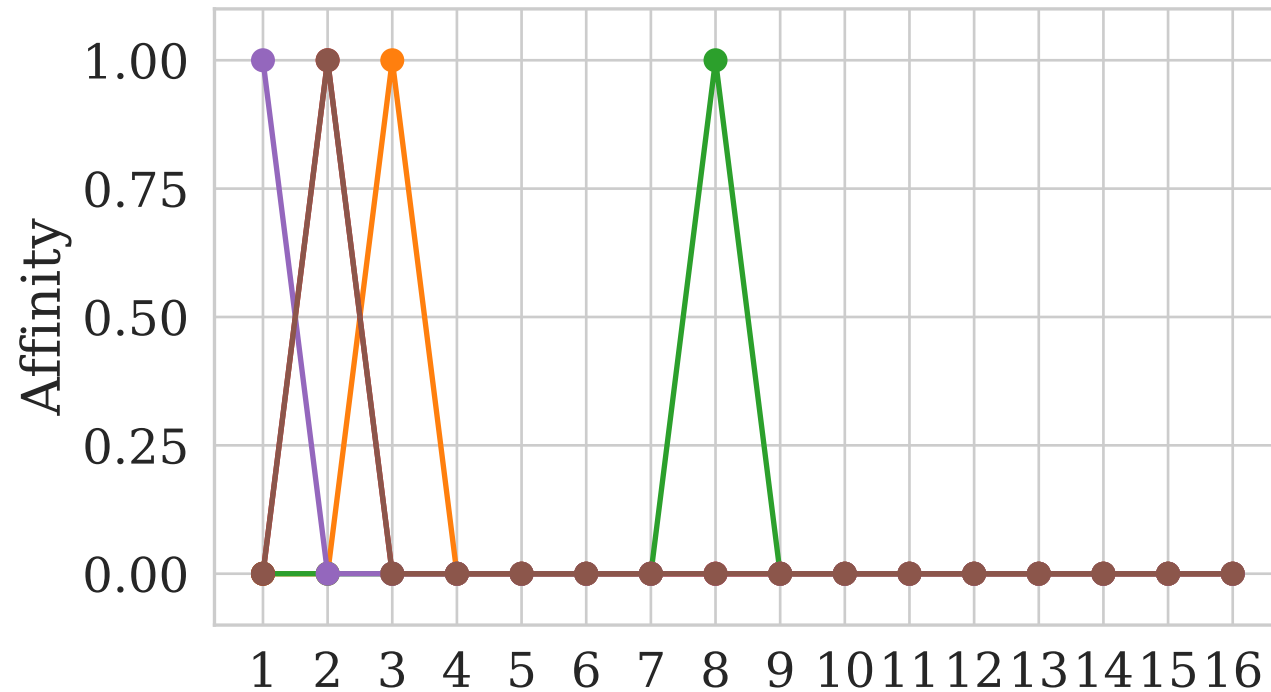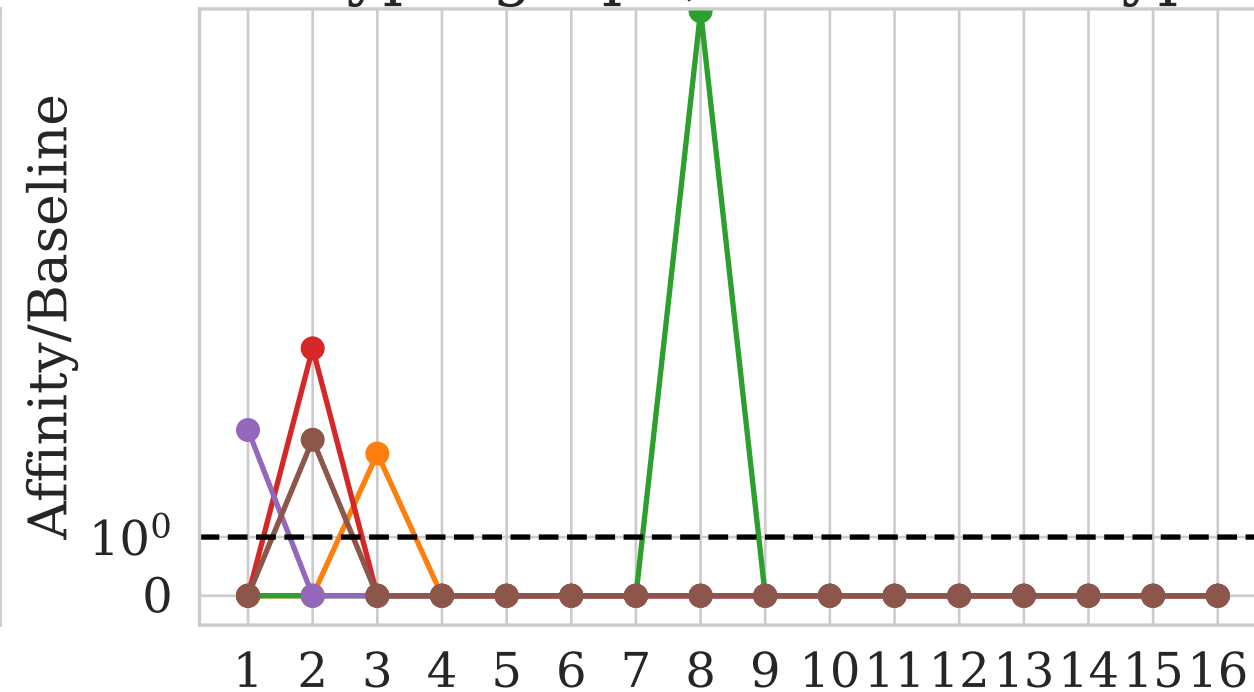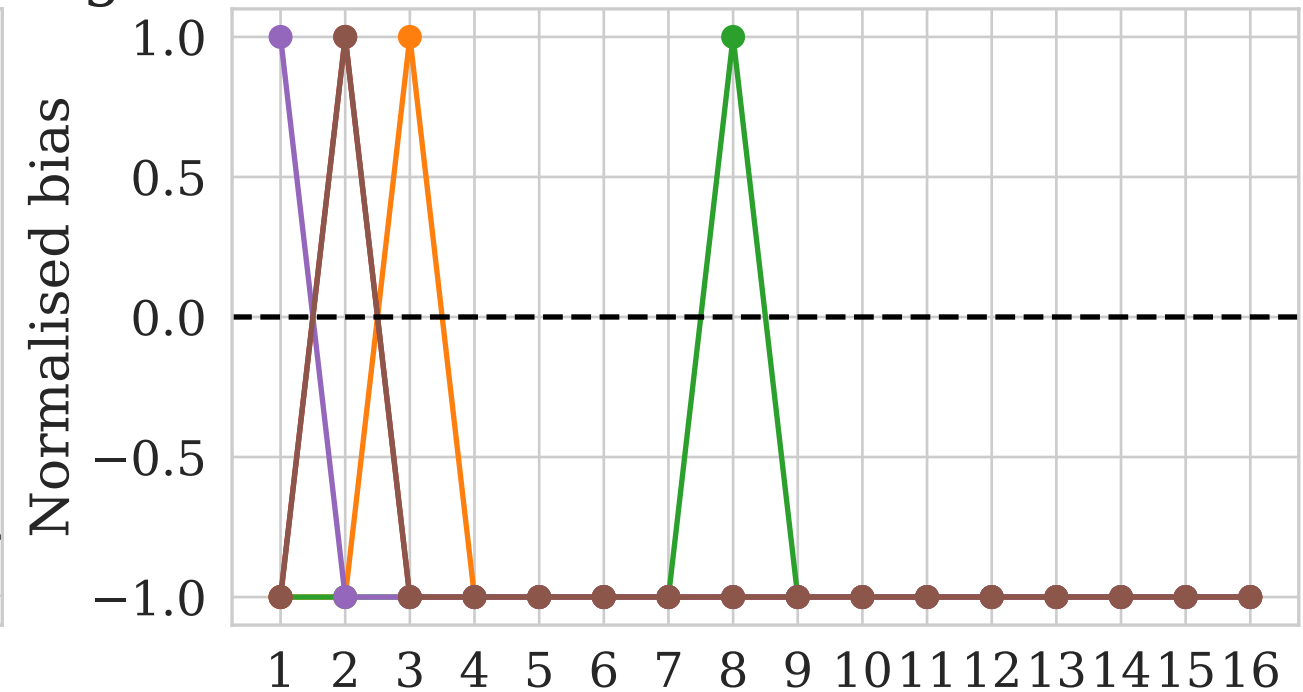

Supplement: supplementary_material [file attachment]
