# Supplementary material
Source: ML conference proceedings conference paper supplement (https://openreview.net/forum?id=YPpkFqMX6V)

535-uniform hypergraph, number of hyperedges: 2

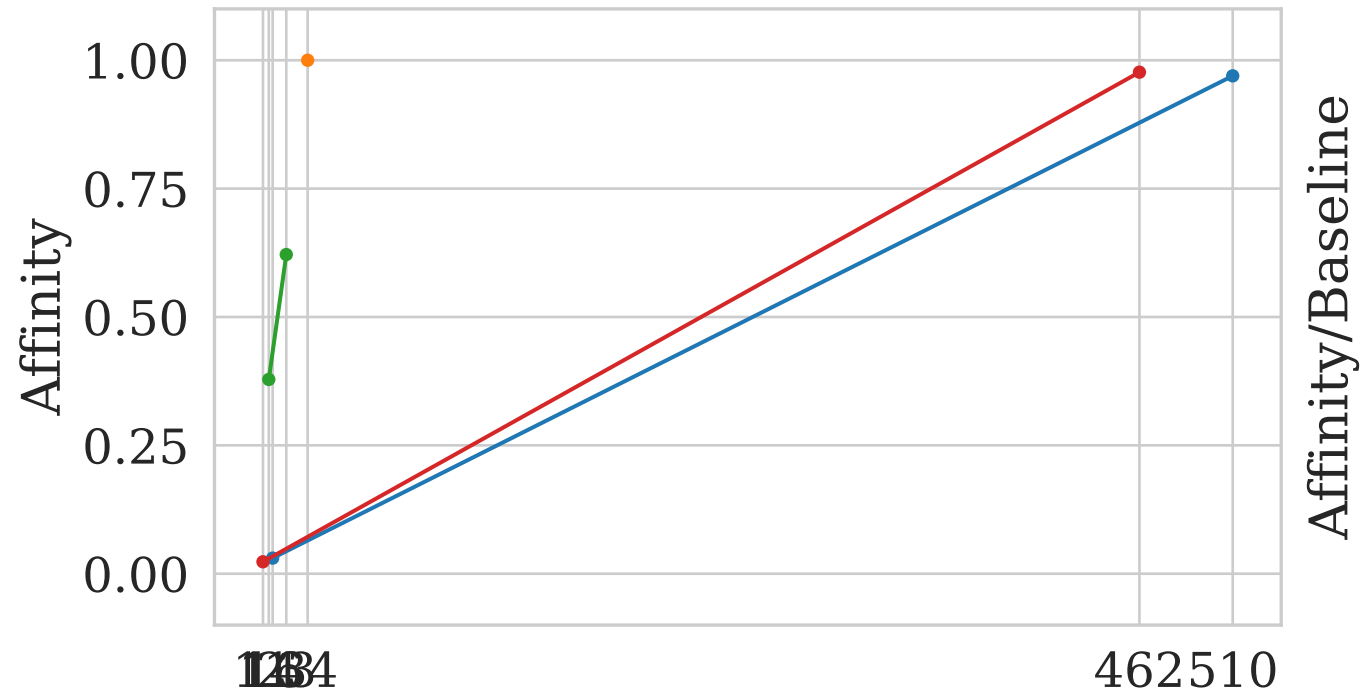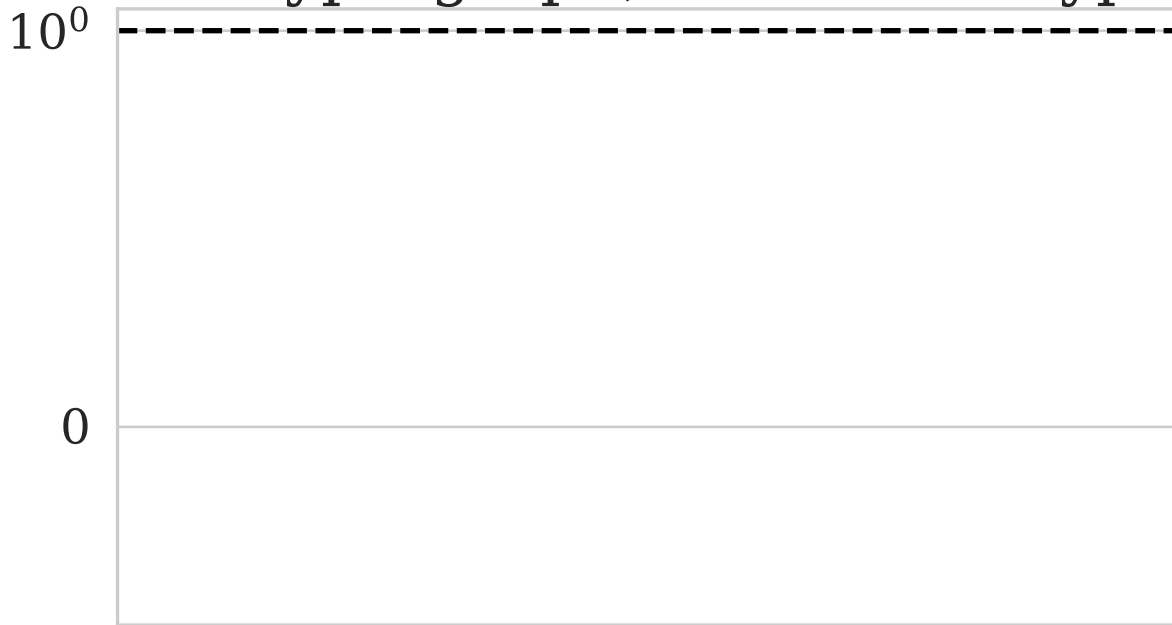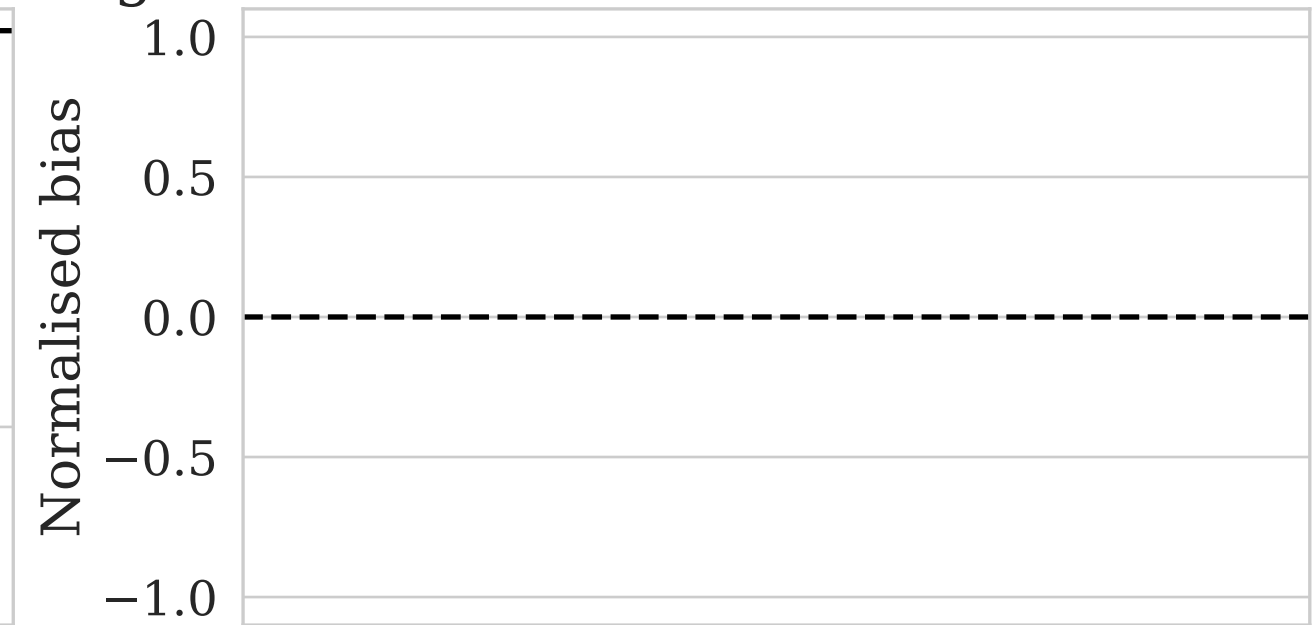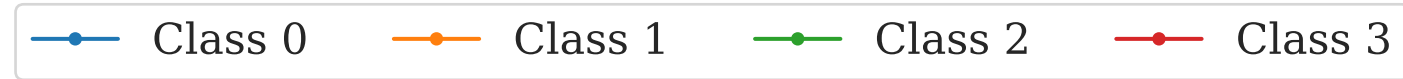

195-uniform hypergraph, number of hyperedges: 2

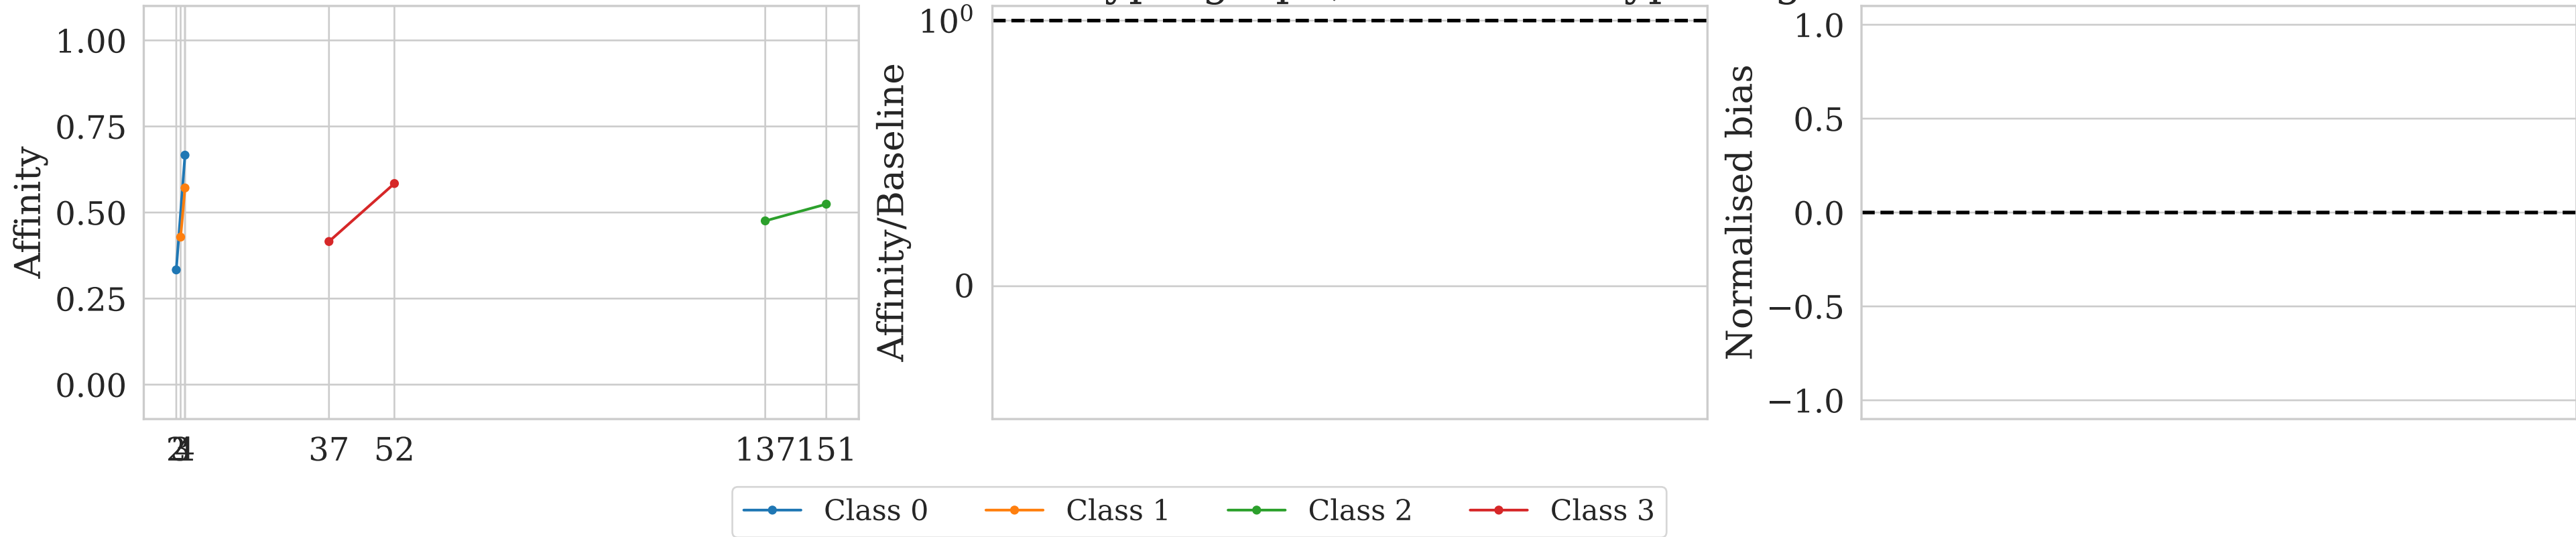

403-uniform hypergraph, number of hyperedges: 1

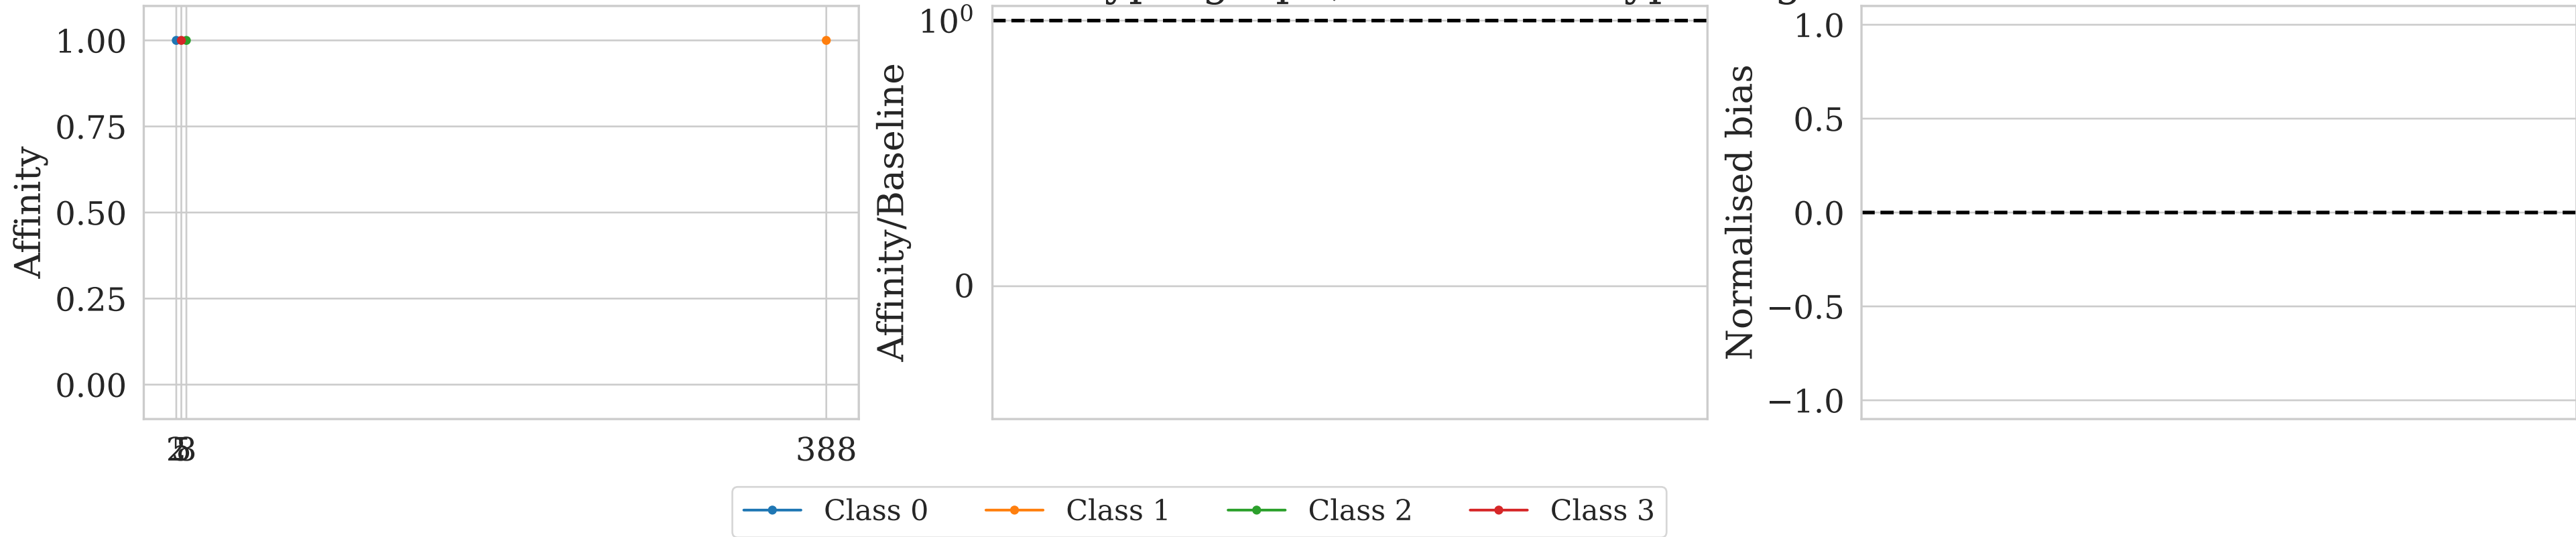

287-uniform hypergraph, number of hyperedges: 1

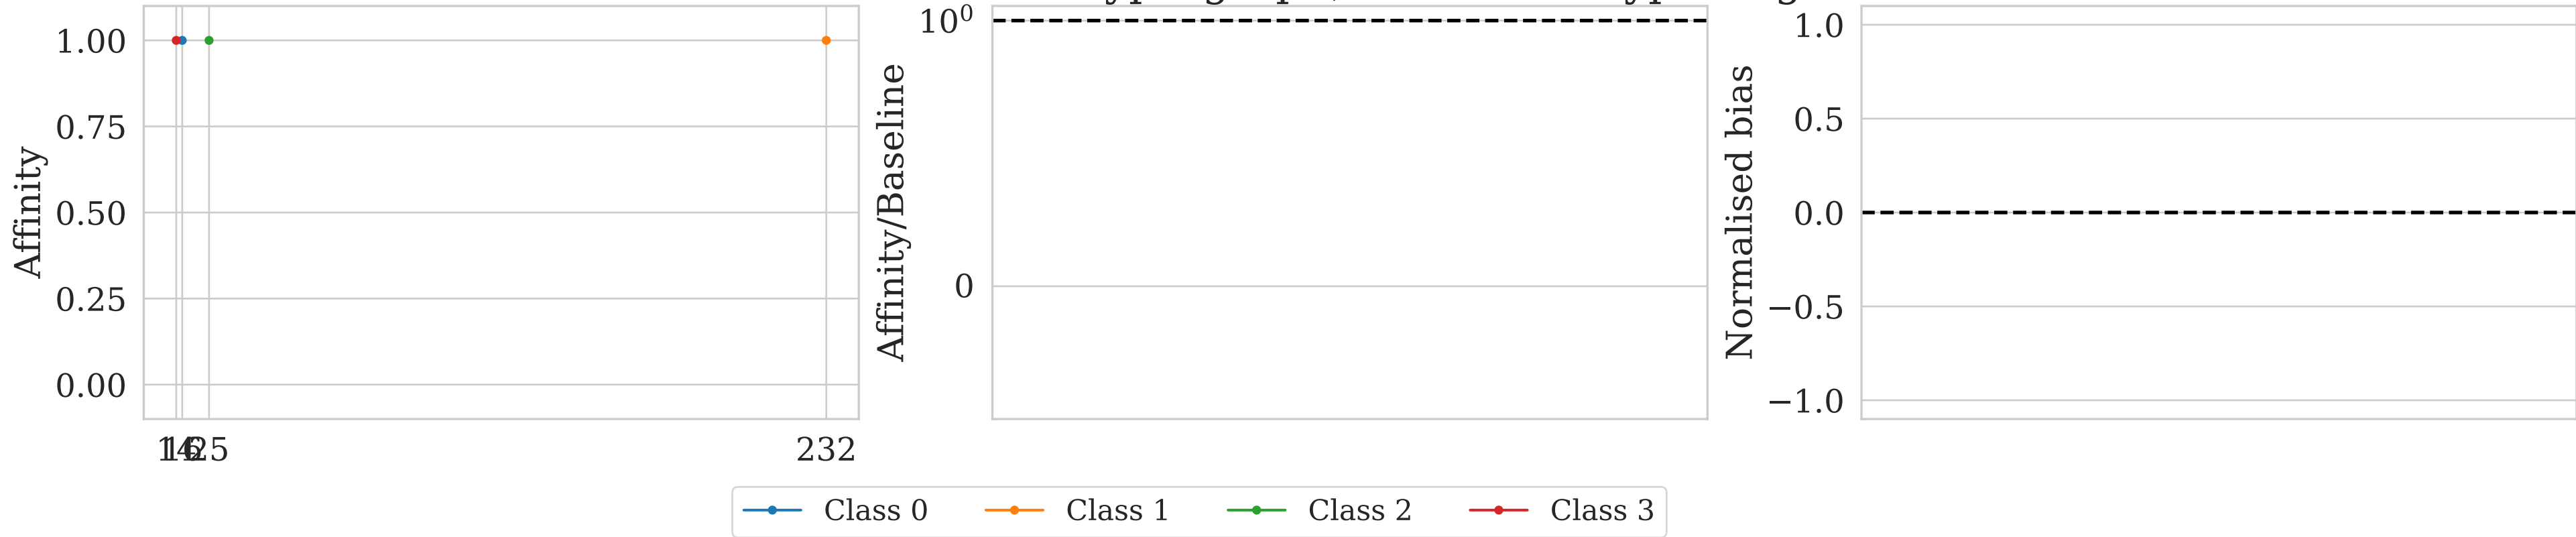

294-uniform hypergraph, number of hyperedges: 1

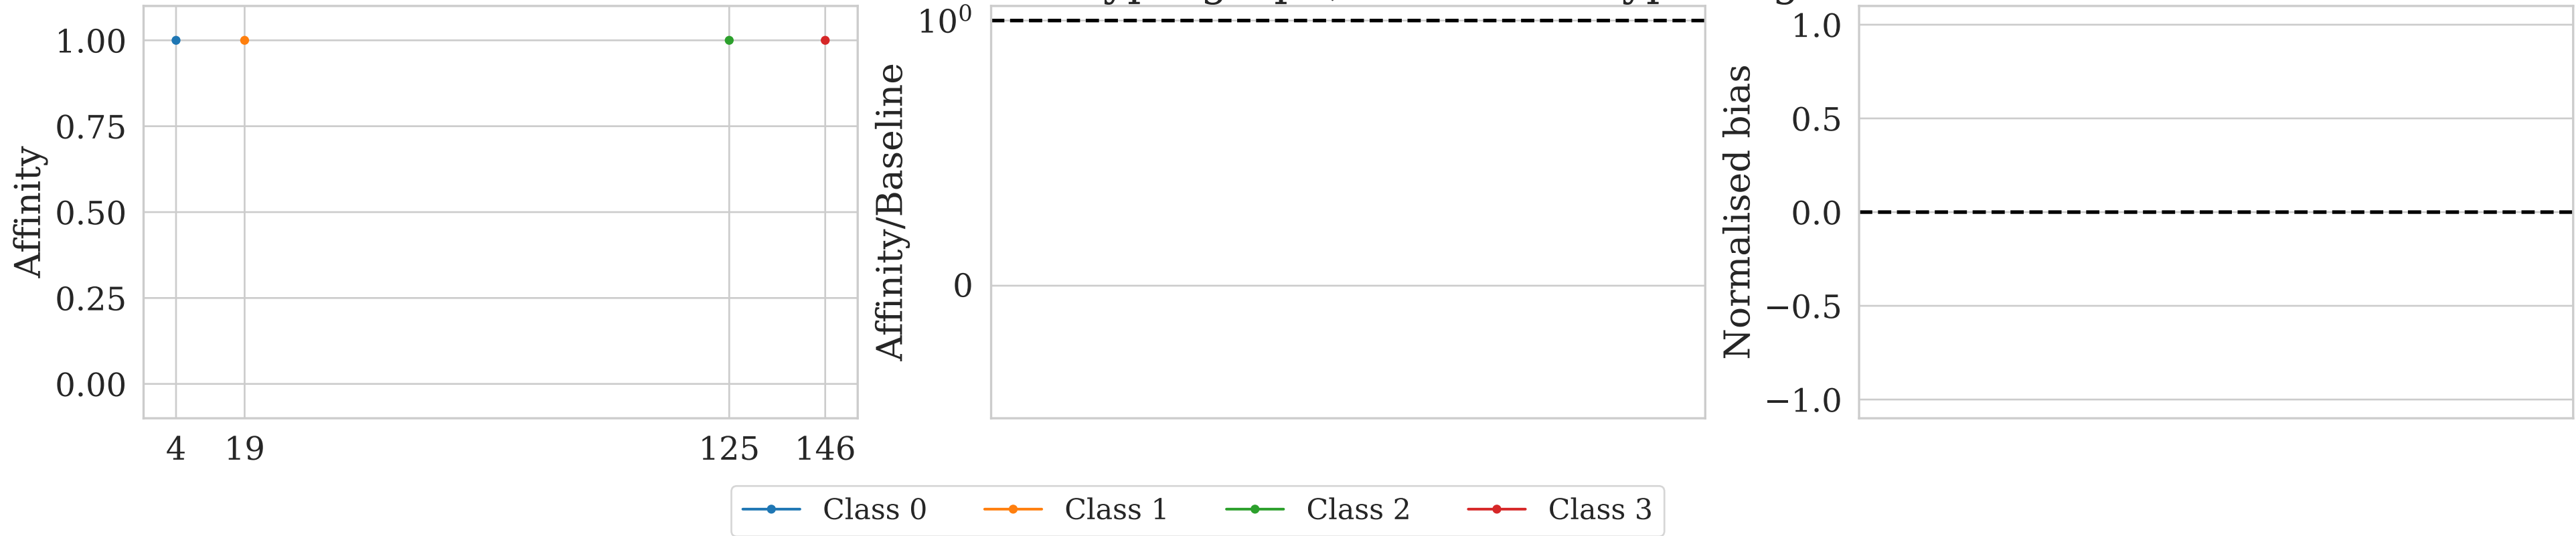

306-uniform hypergraph, number of hyperedges: 1

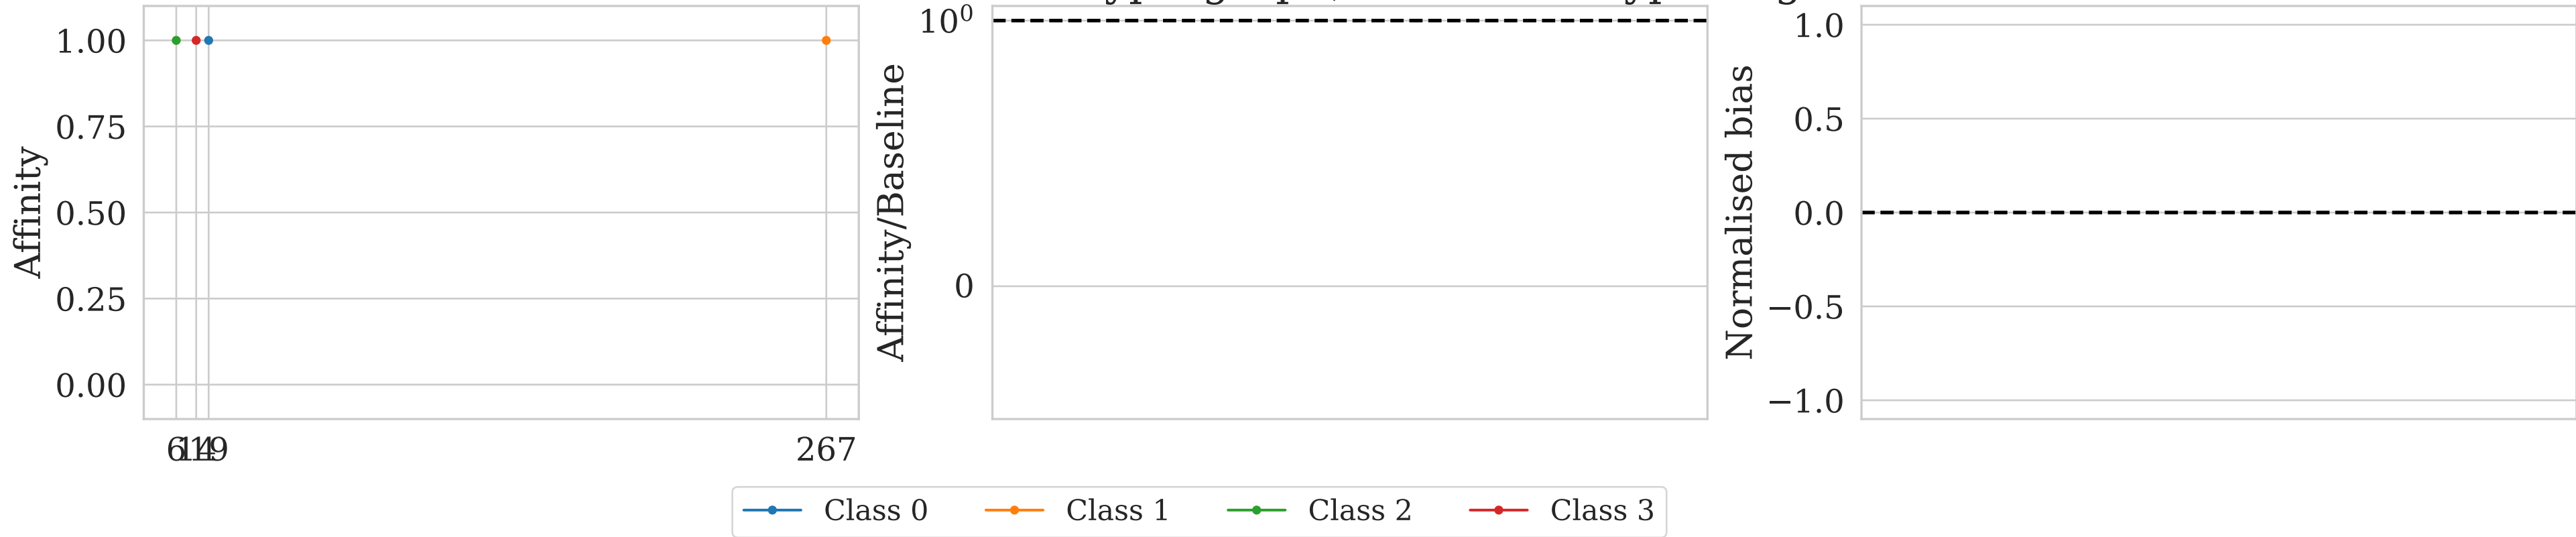

310-uniform hypergraph, number of hyperedges: 1

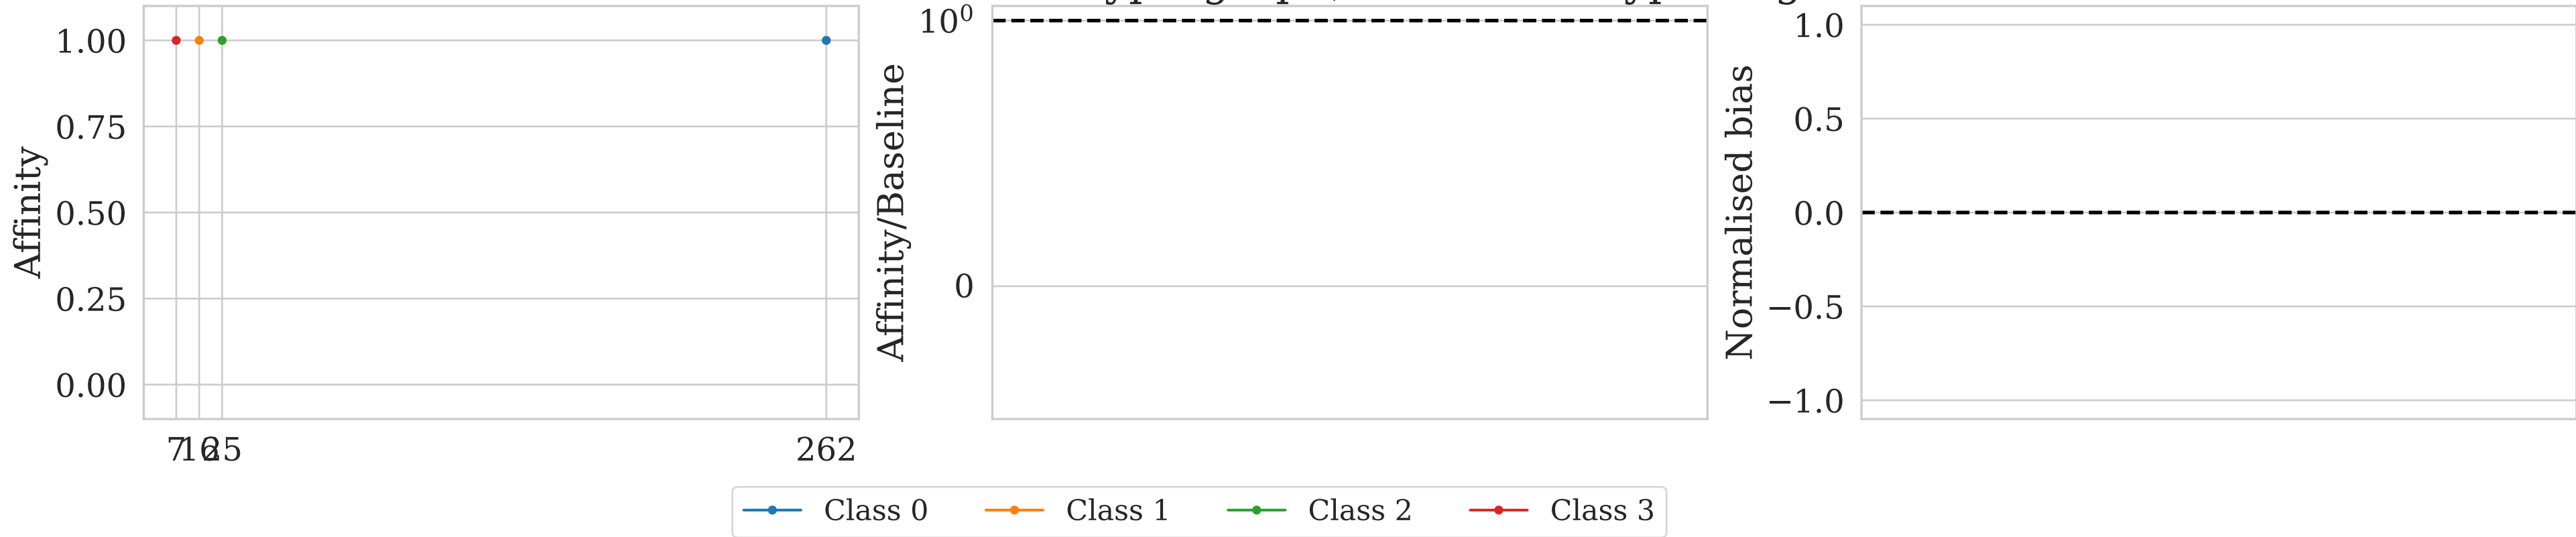

321-uniform hypergraph, number of hyperedges: 1

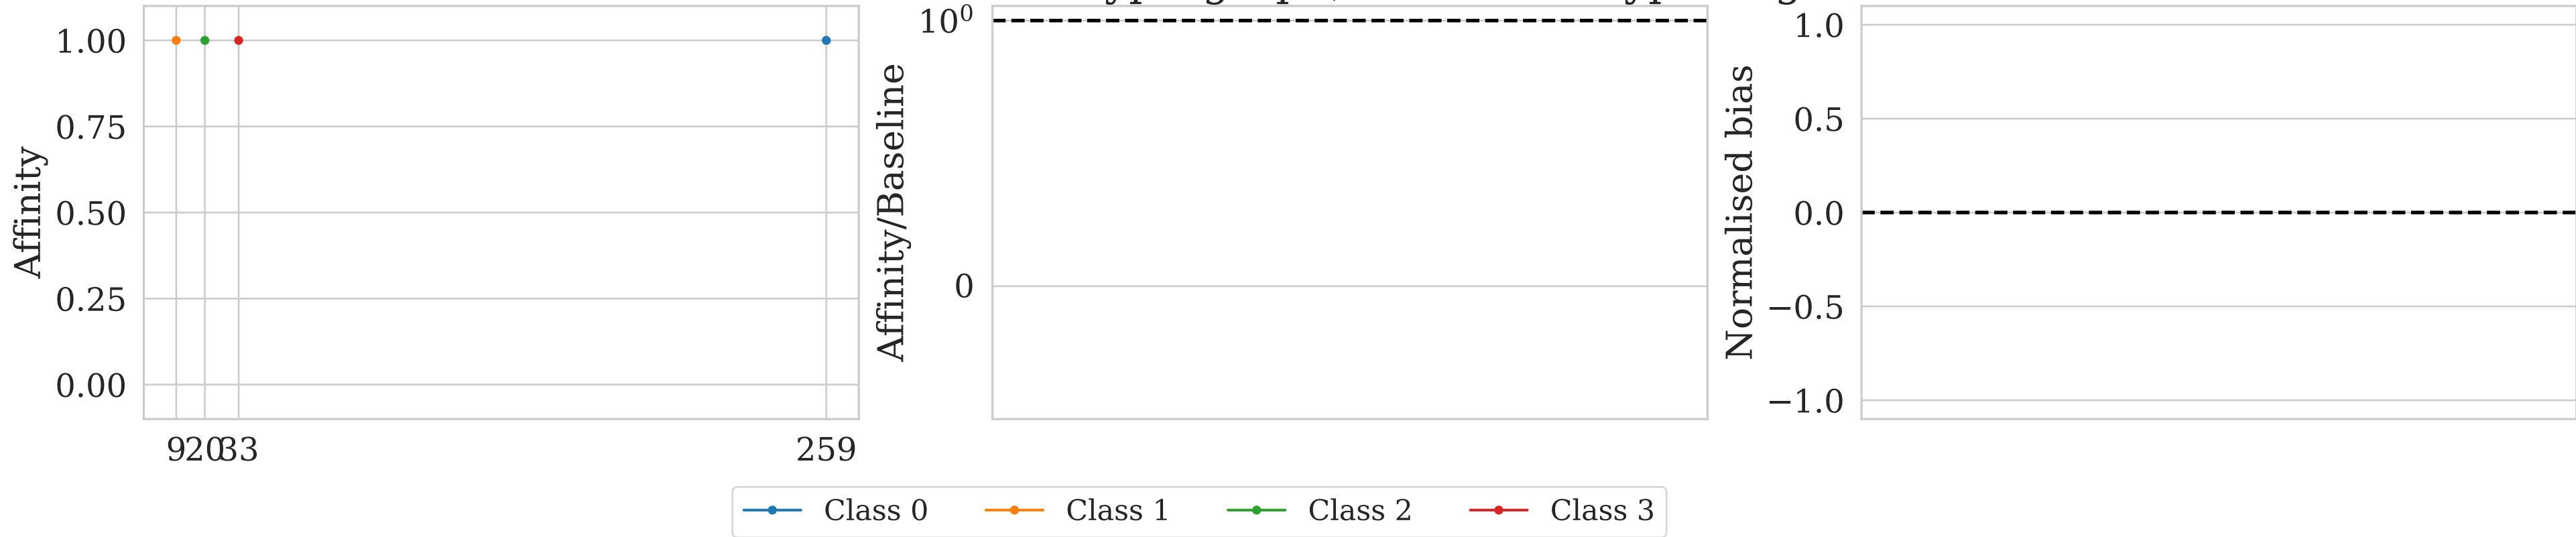



325-uniform hypergraph, number of hyperedges: 1

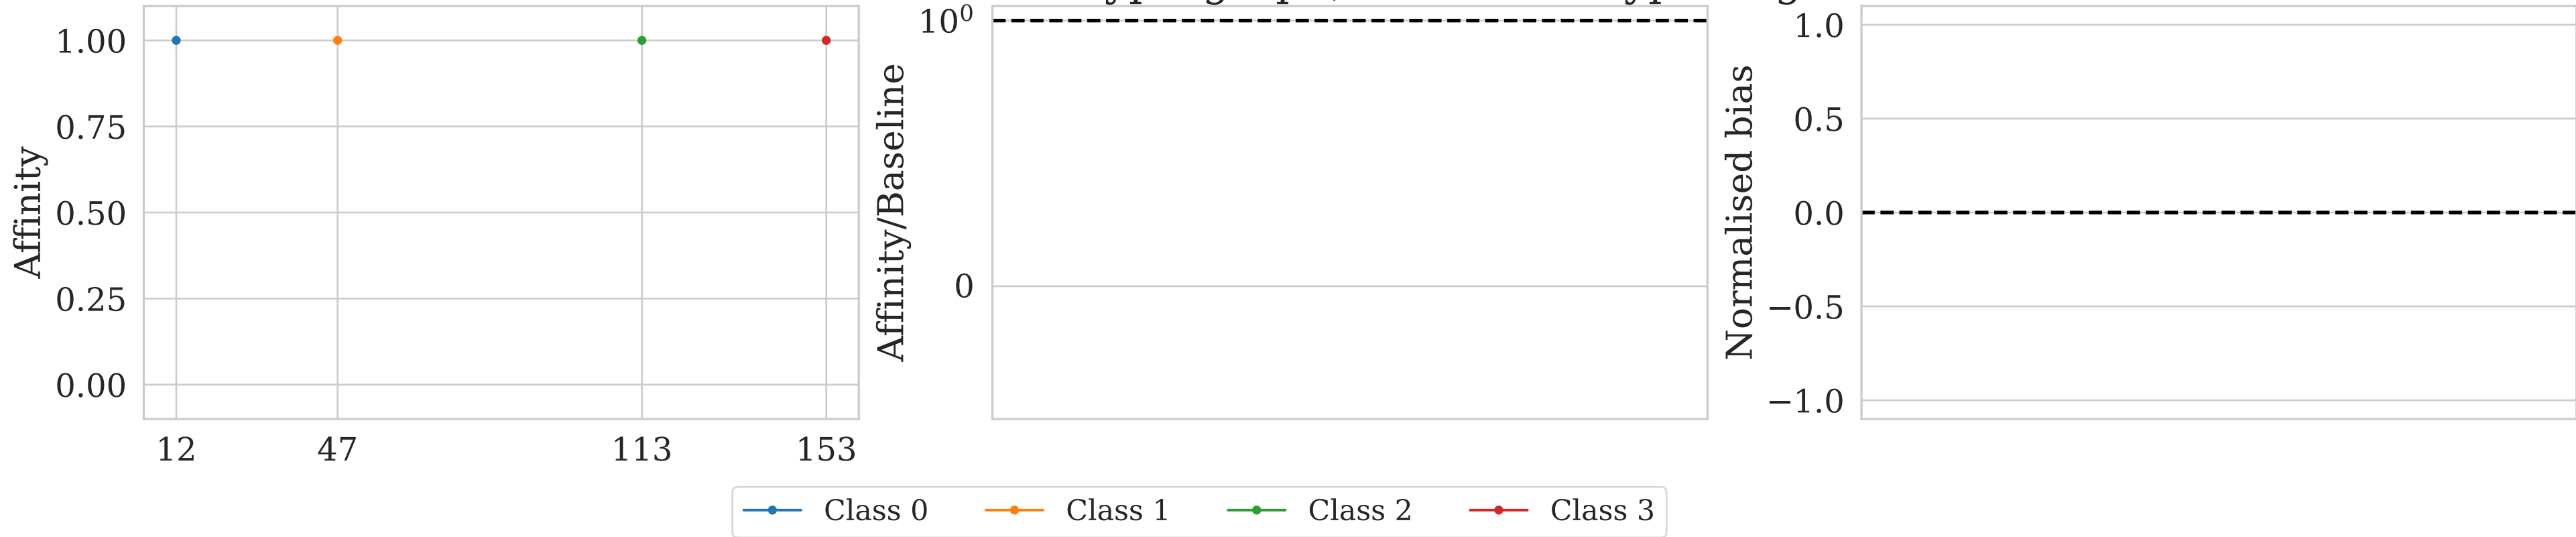

372-uniform hypergraph, number of hyperedges: 1

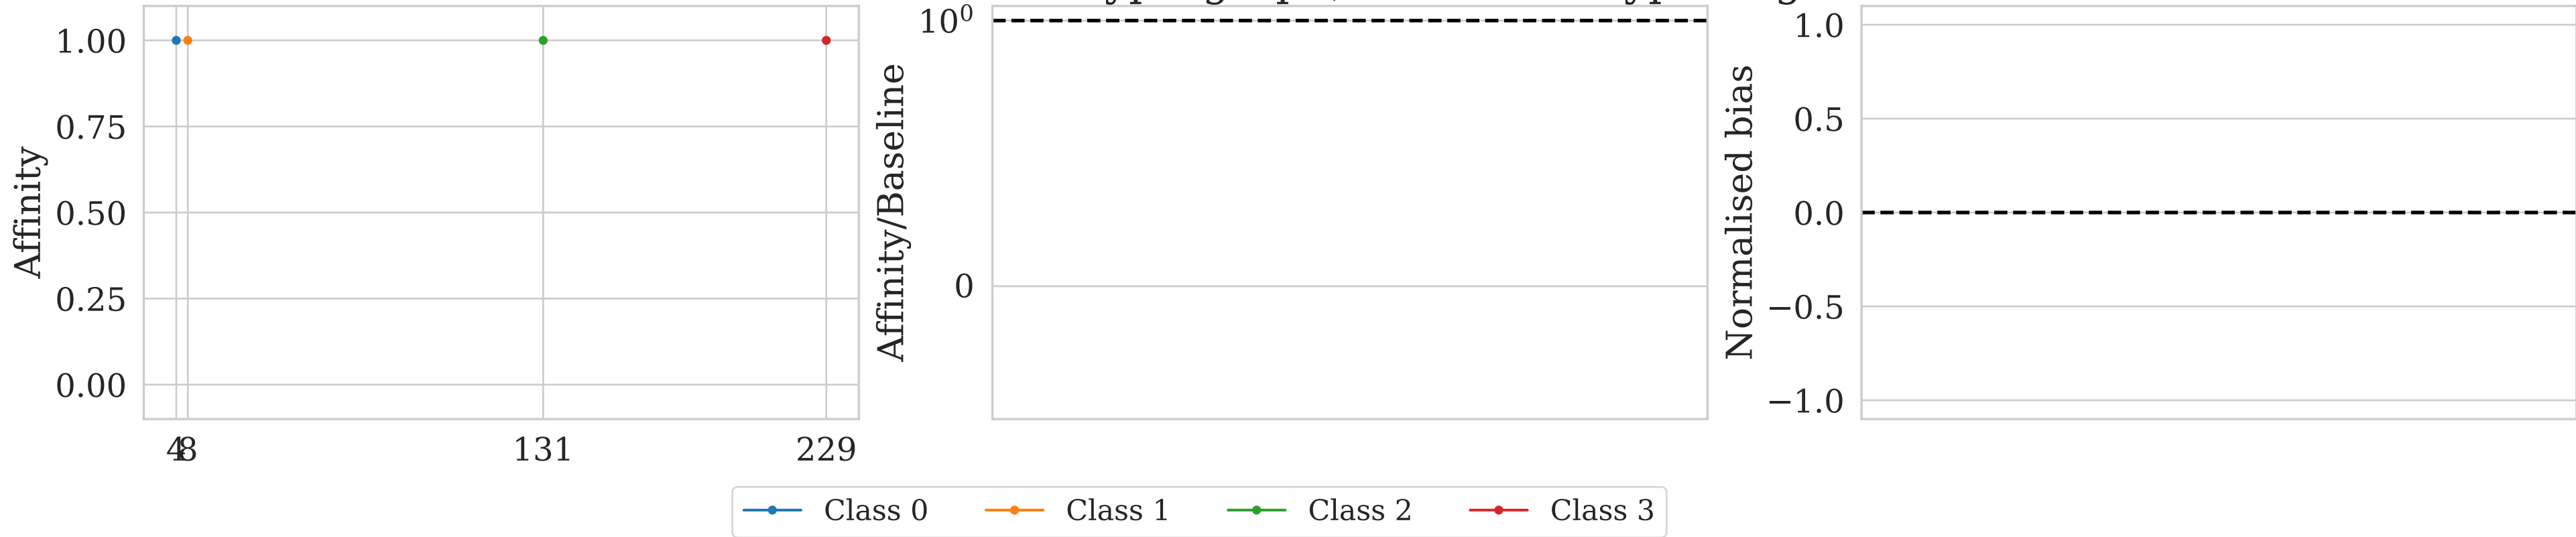

378-uniform hypergraph, number of hyperedges: 1

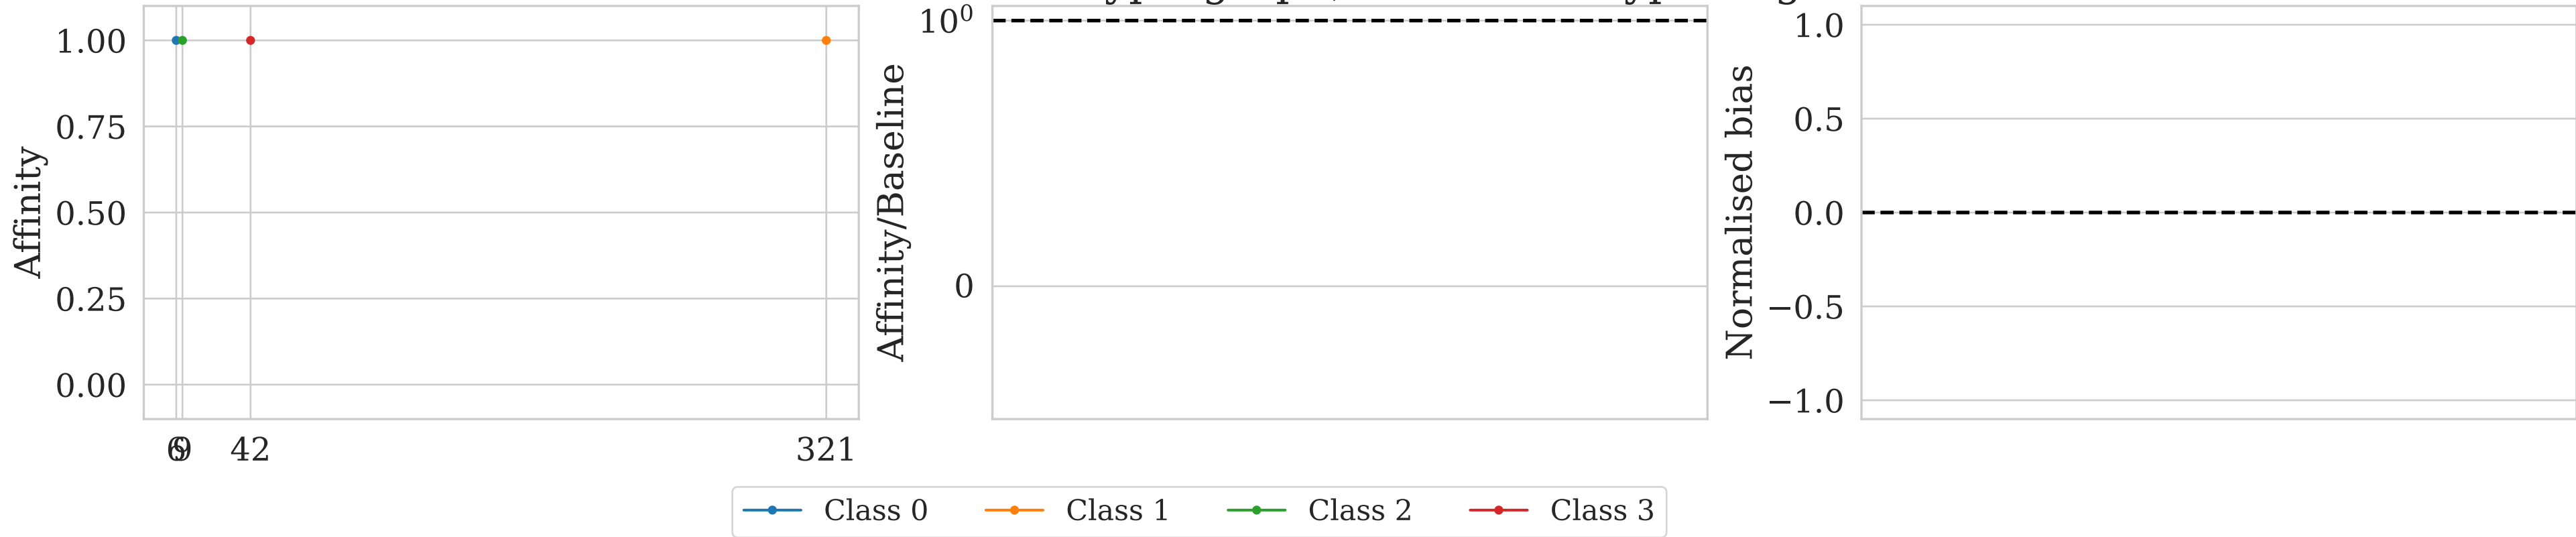

398-uniform hypergraph, number of hyperedges: 1

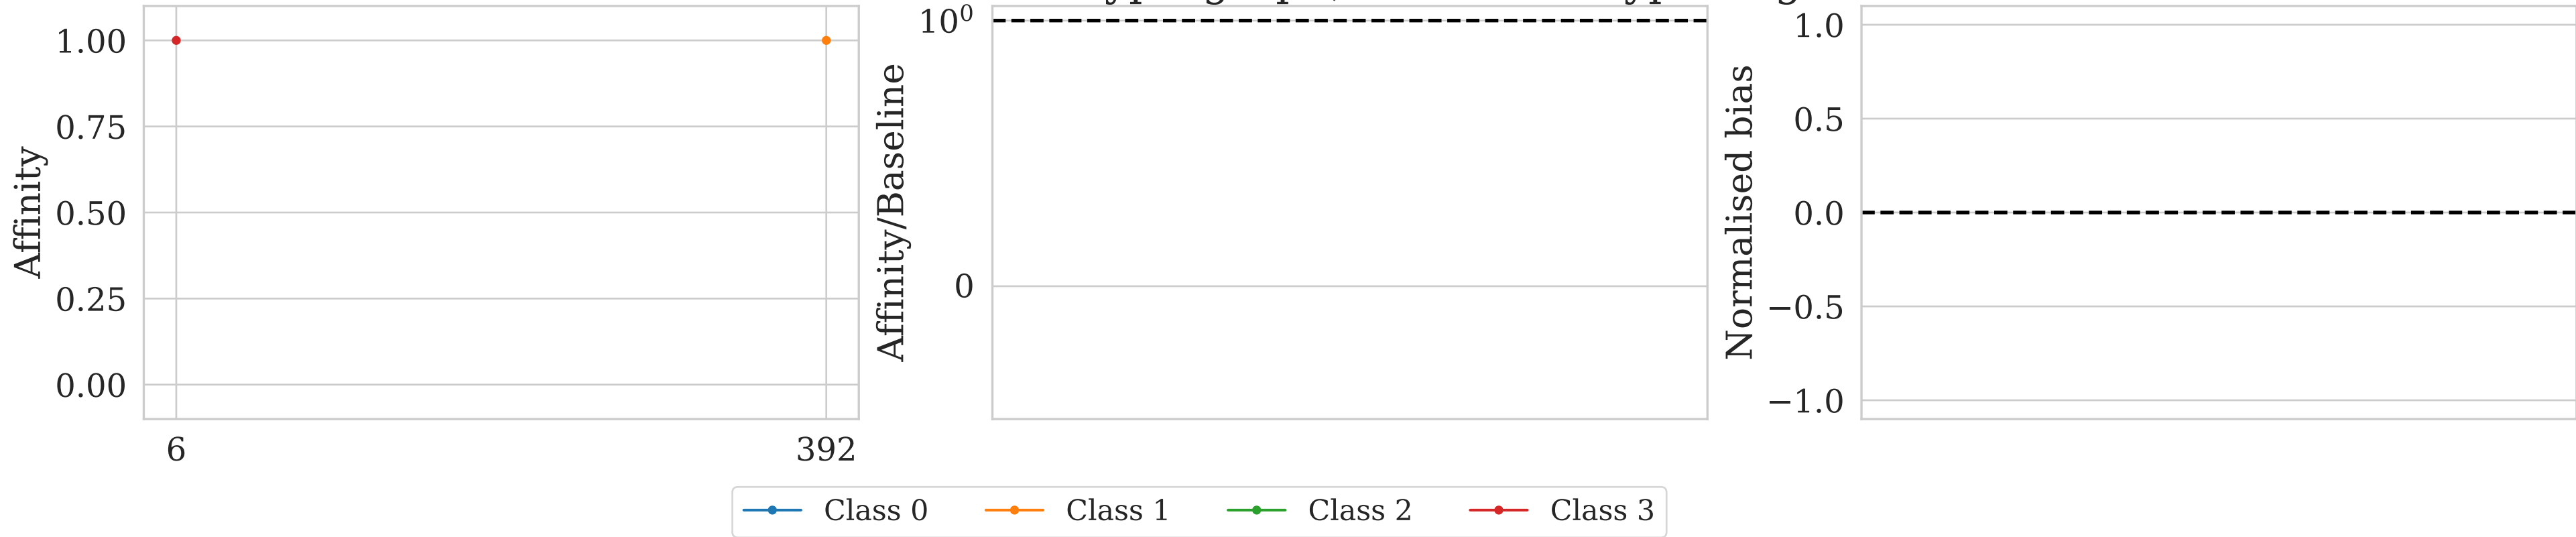

413-uniform hypergraph, number of hyperedges: 1

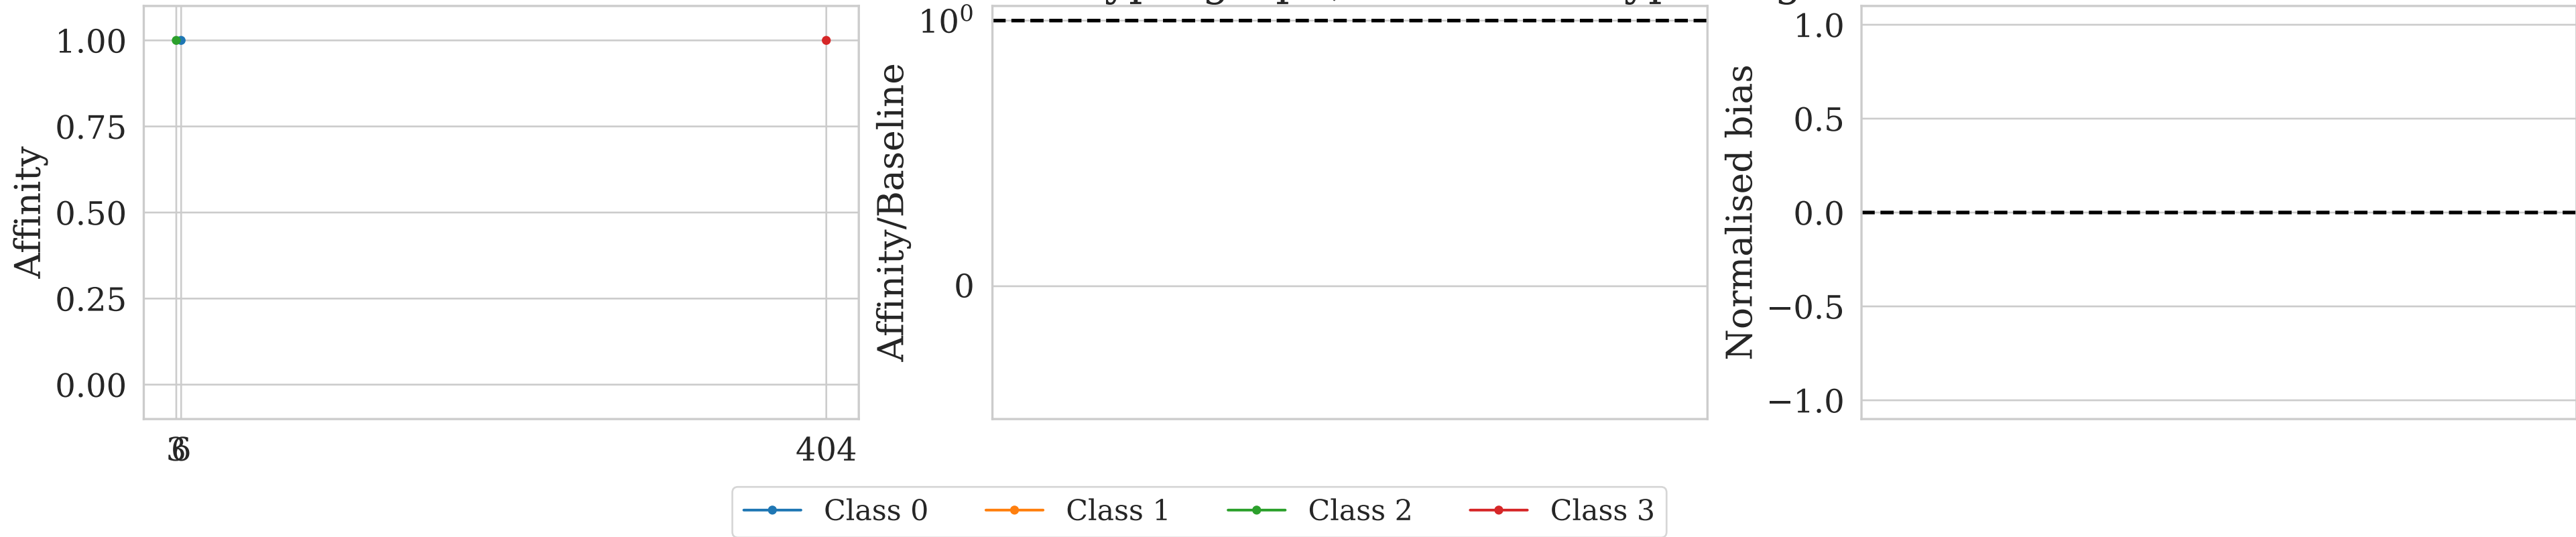

261-uniform hypergraph, number of hyperedges: 1

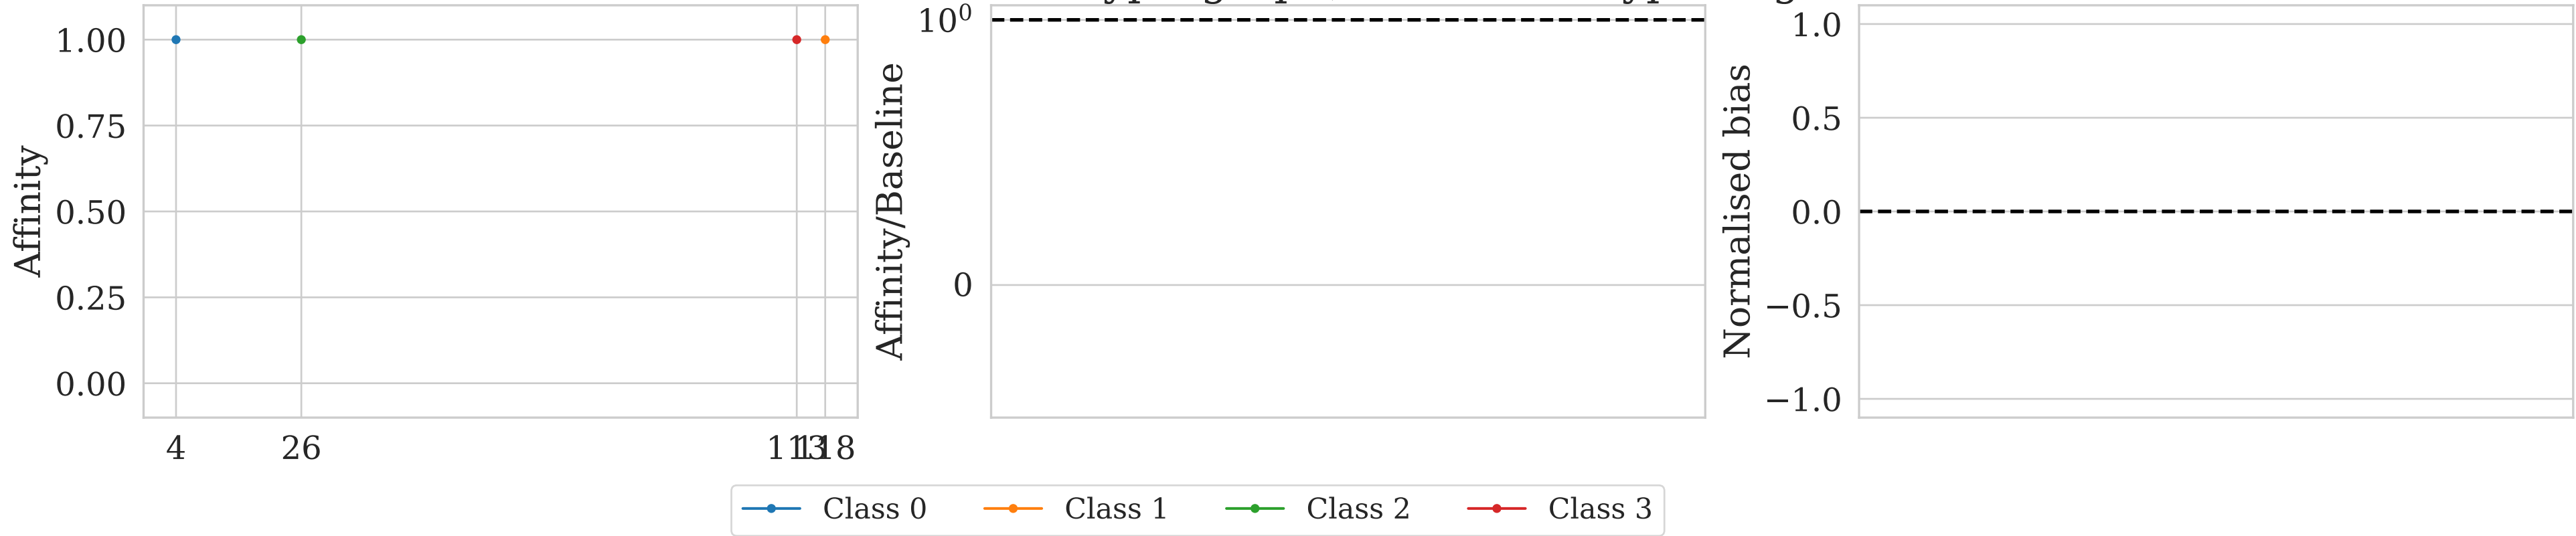

442-uniform hypergraph, number of hyperedges: 1

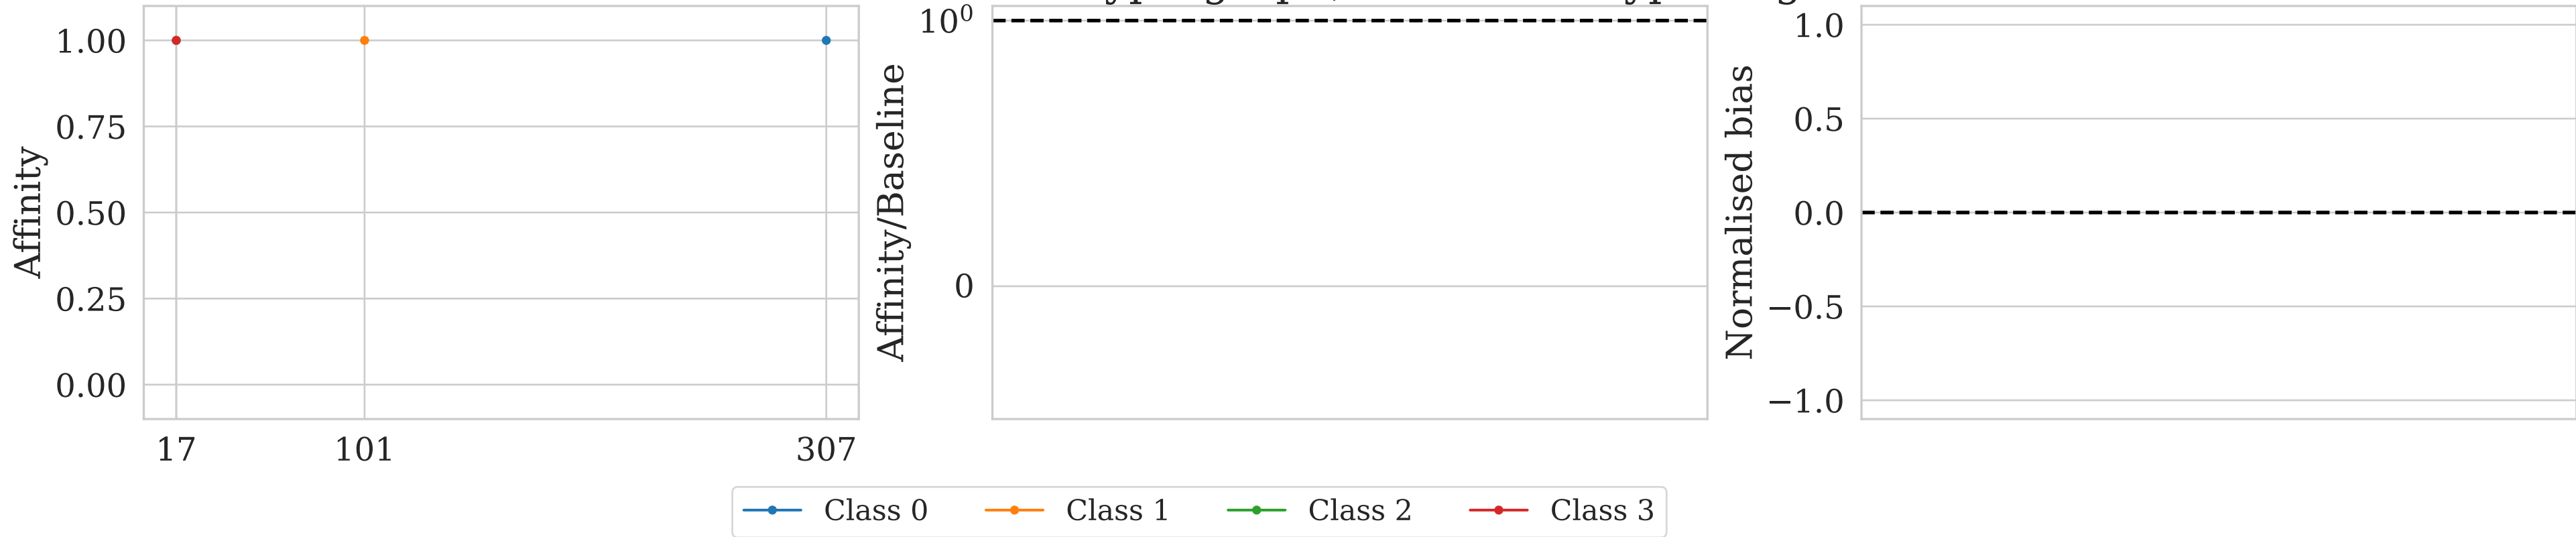

445-uniform hypergraph, number of hyperedges: 1

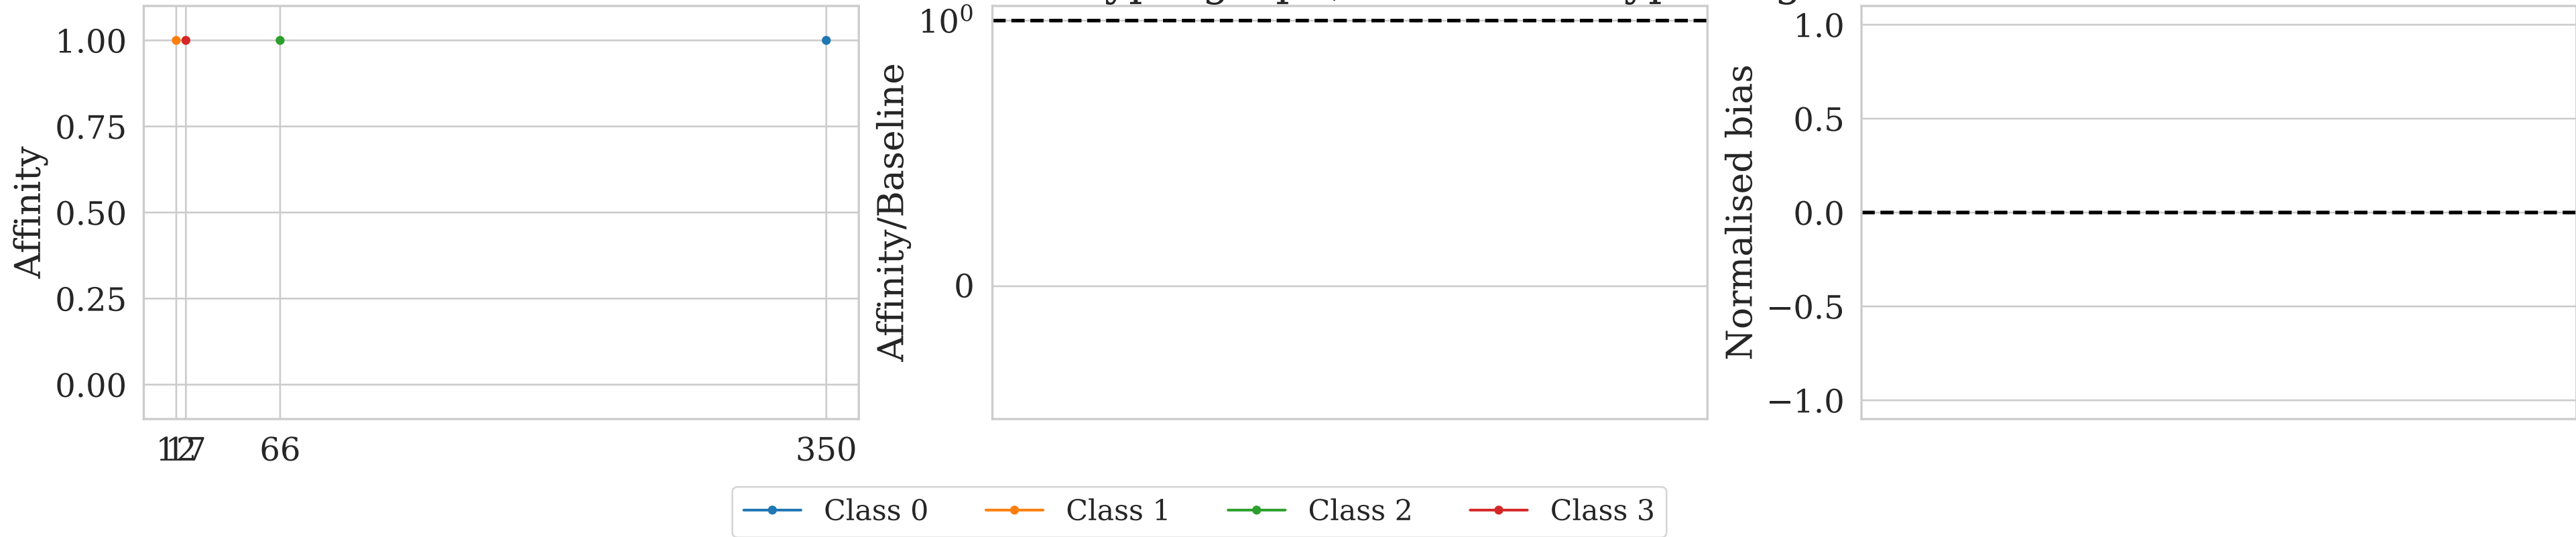



450-uniform hypergraph, number of hyperedges: 1

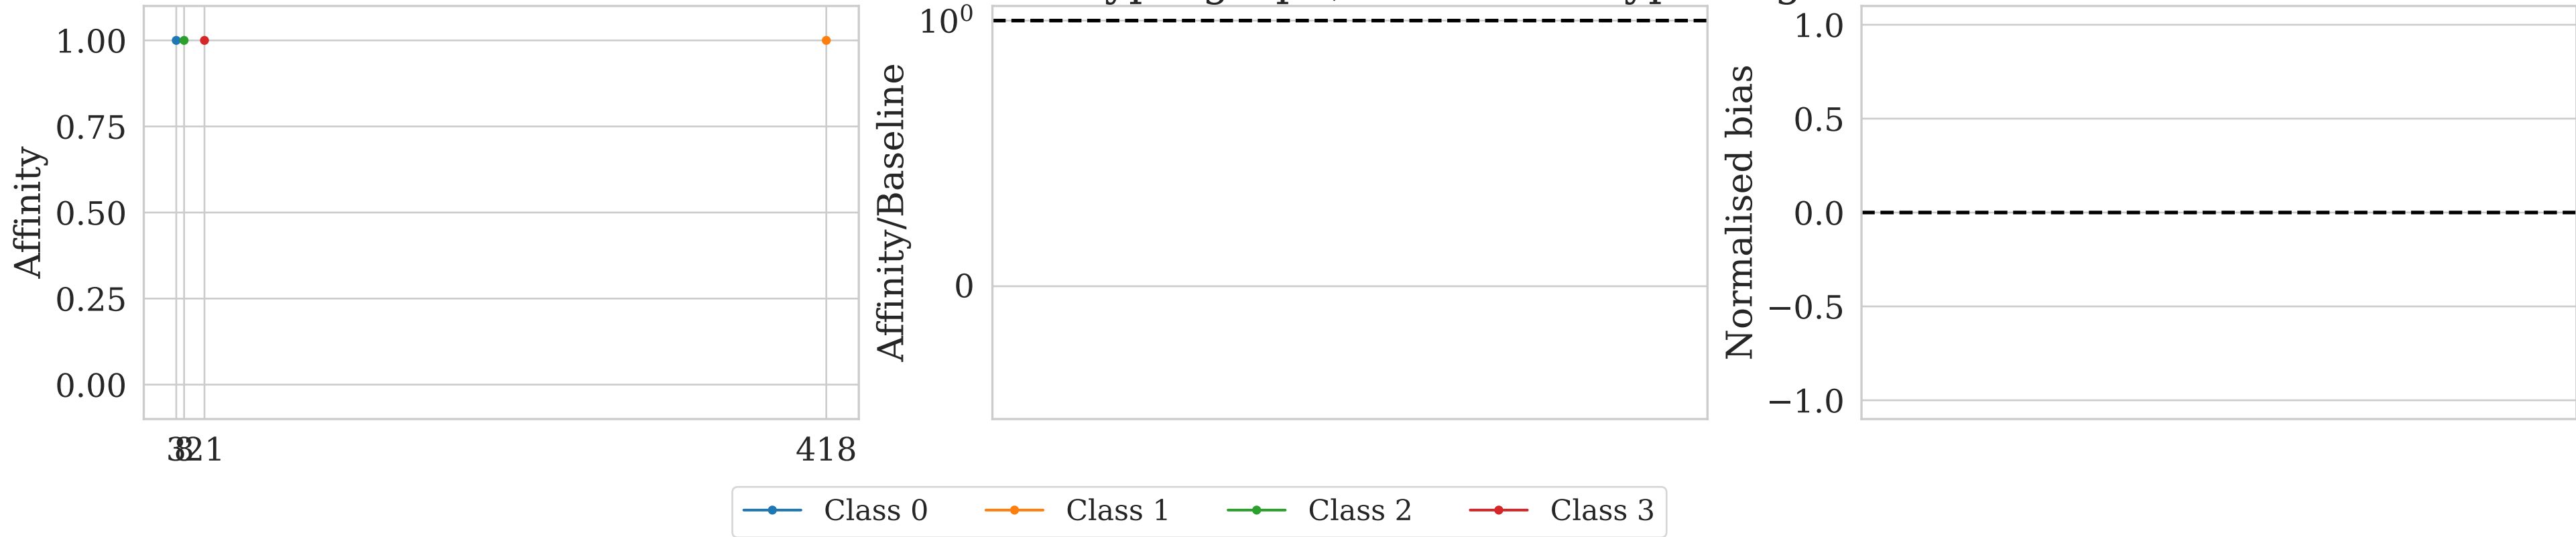

454-uniform hypergraph, number of hyperedges: 1

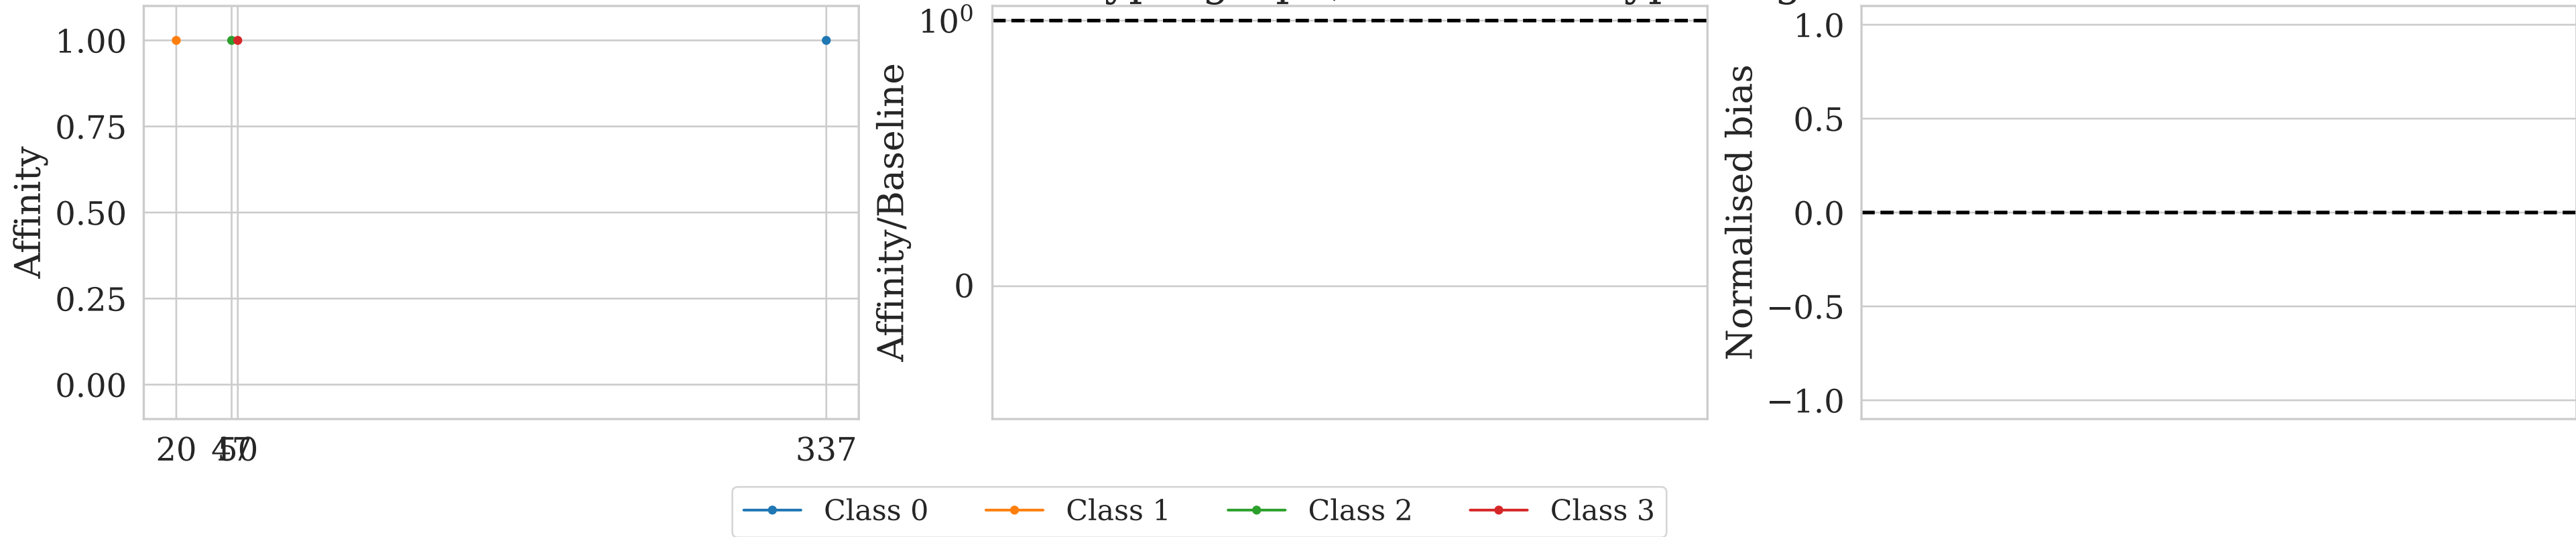

460-uniform hypergraph, number of hyperedges: 1

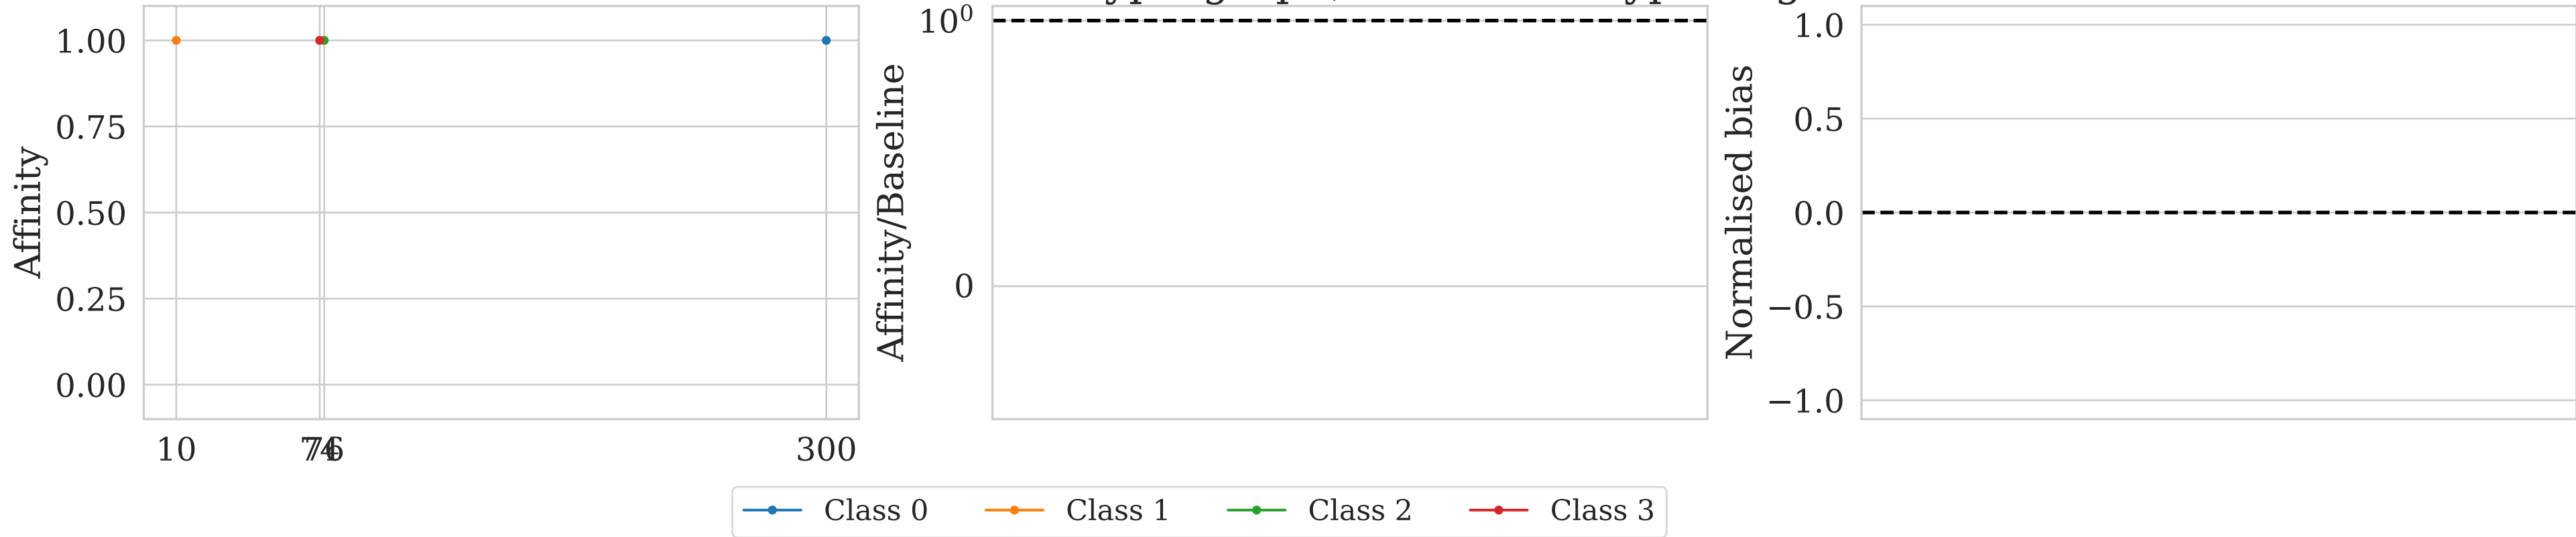

462-uniform hypergraph, number of hyperedges: 1

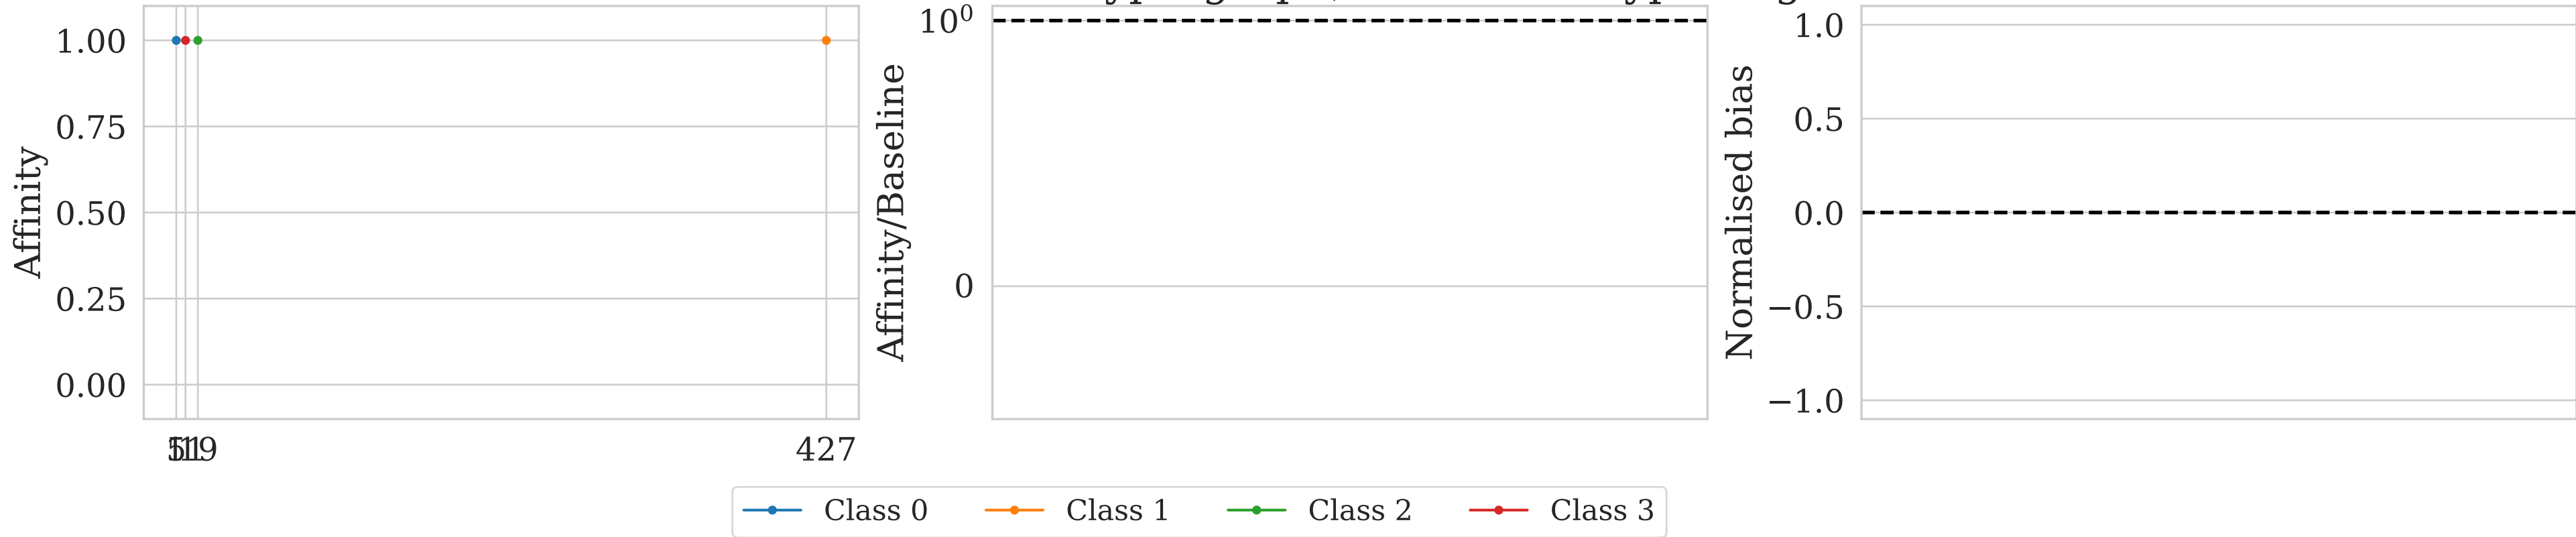

476-uniform hypergraph, number of hyperedges: 1

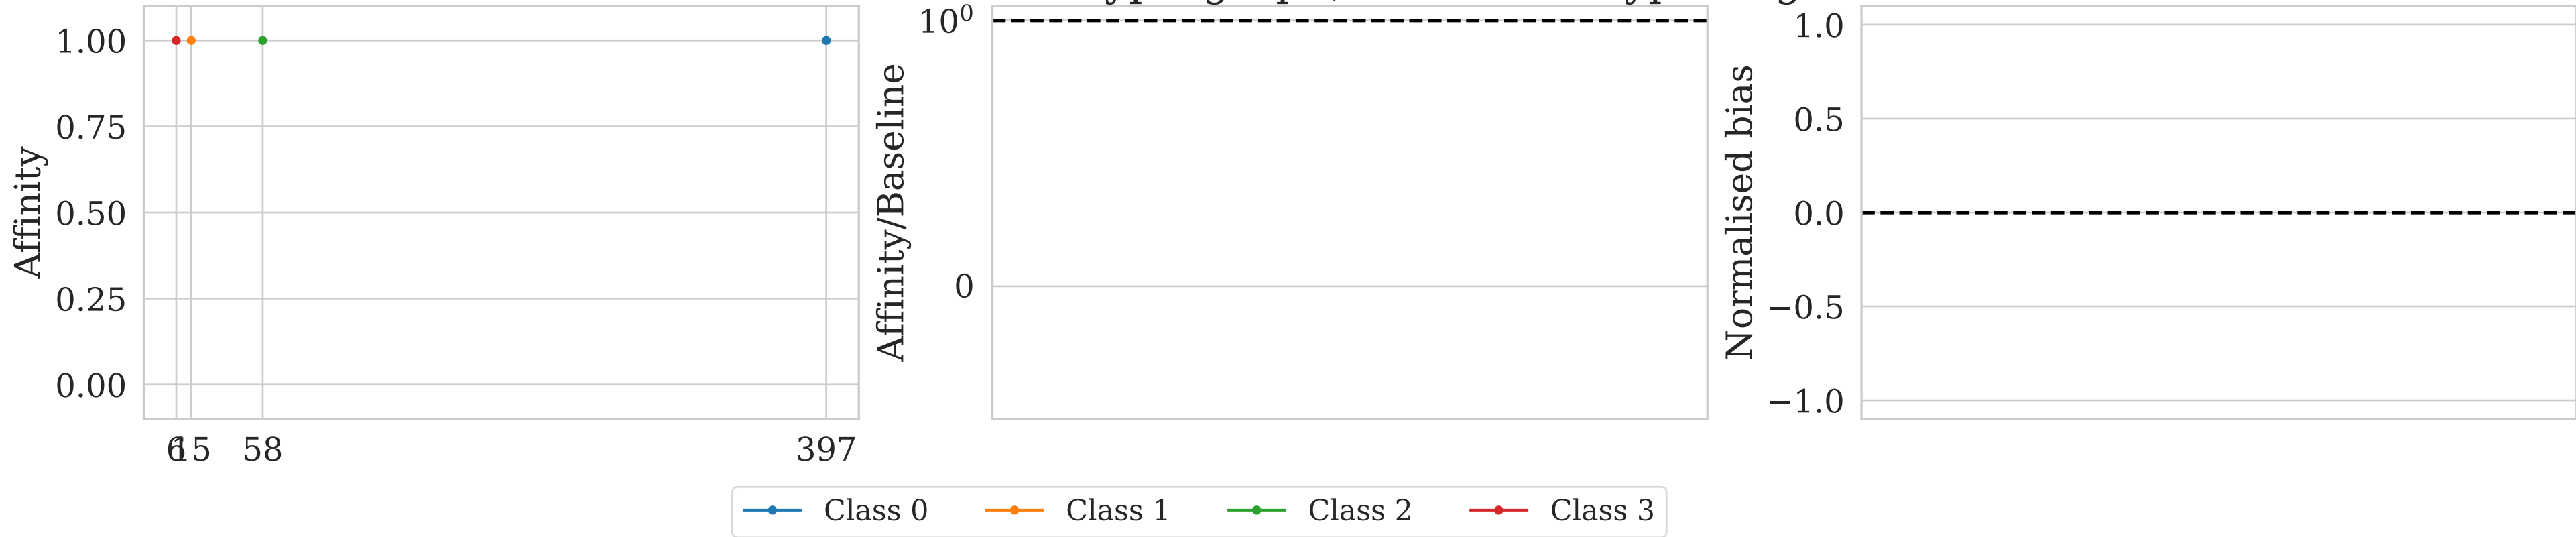

502-uniform hypergraph, number of hyperedges: 1

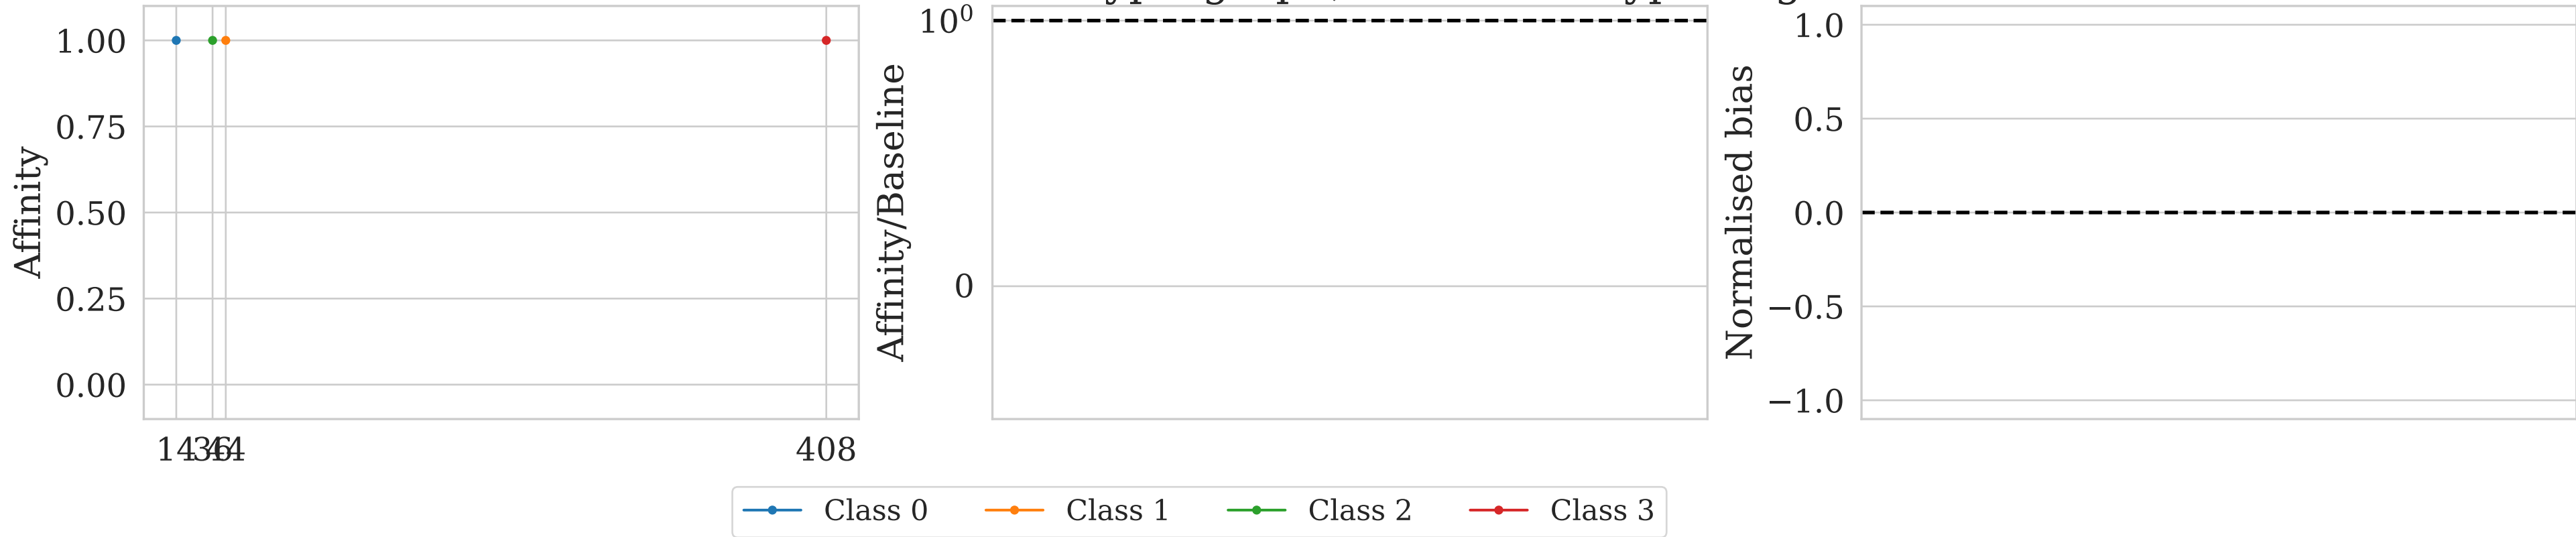

519-uniform hypergraph, number of hyperedges: 1

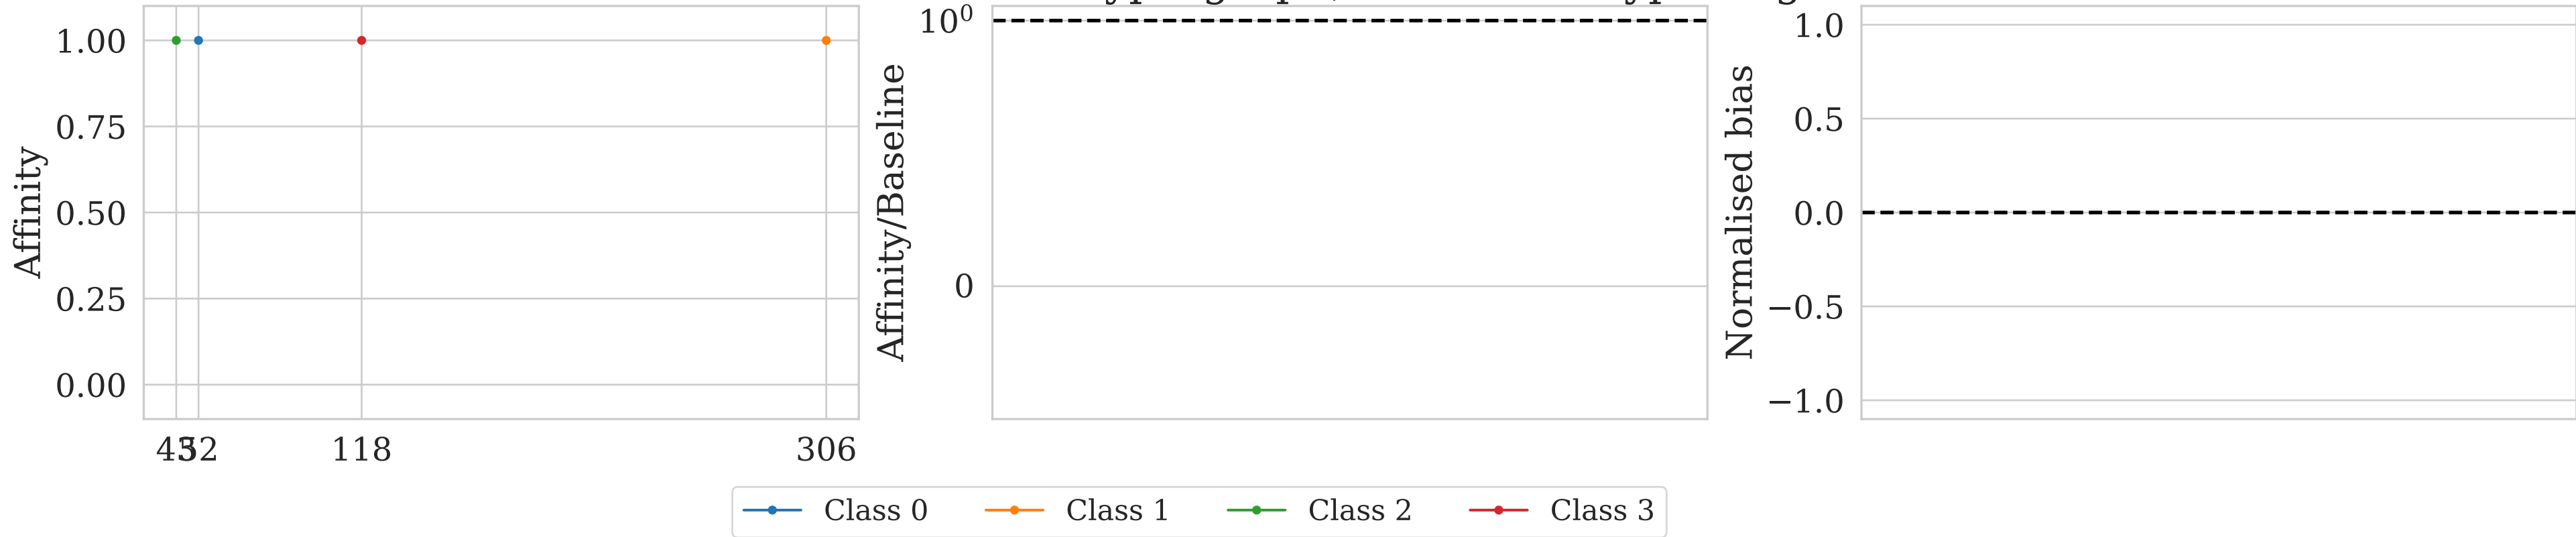

523-uniform hypergraph, number of hyperedges: 1

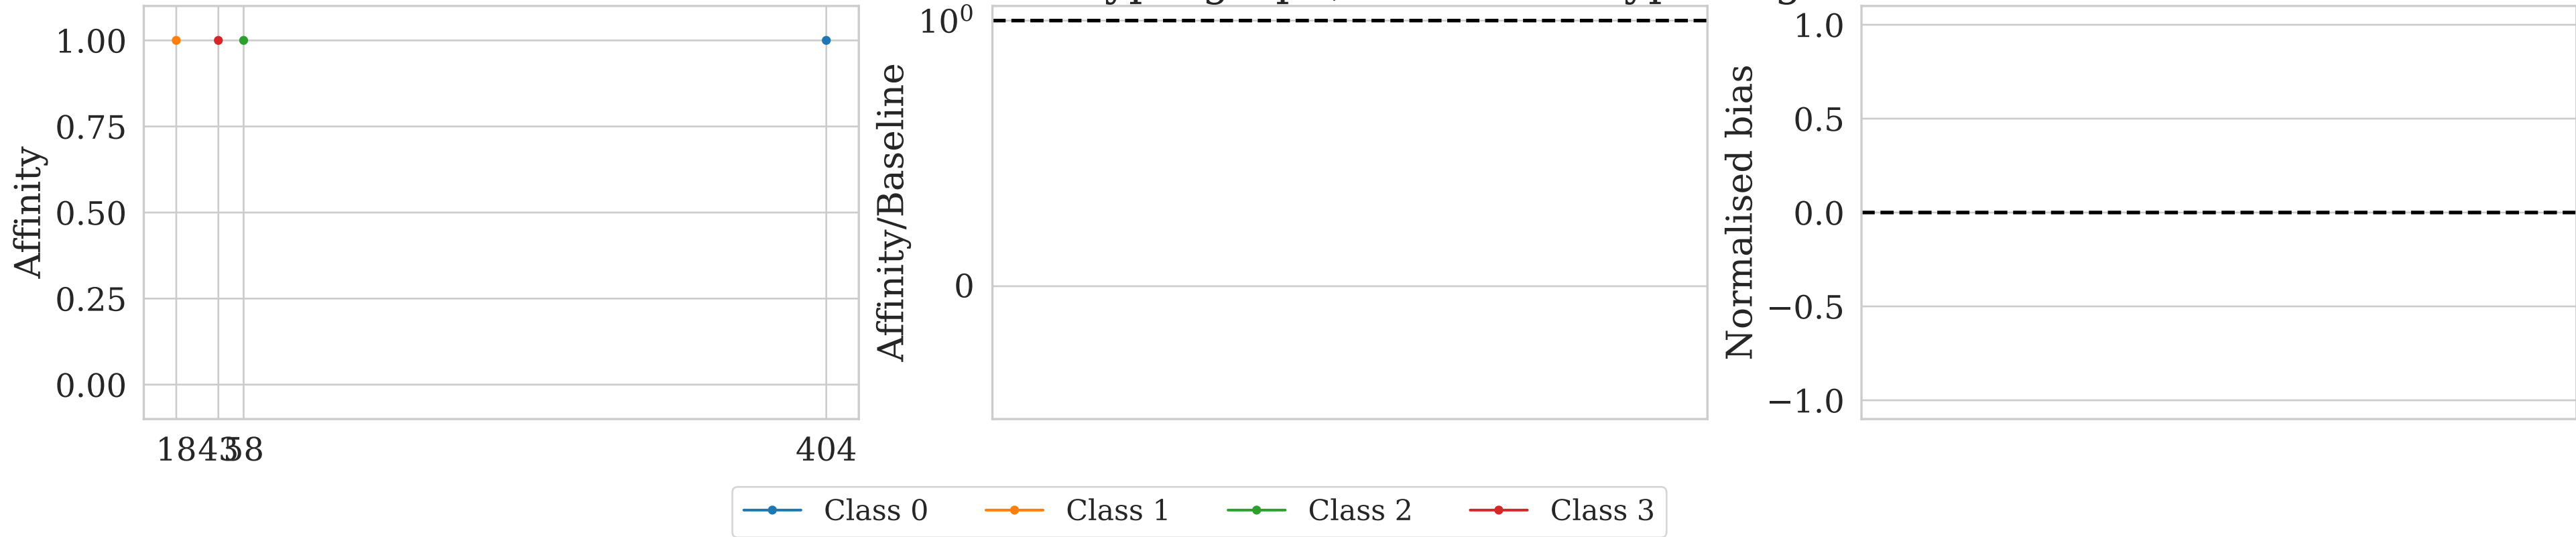



271-uniform hypergraph, number of hyperedges: 1

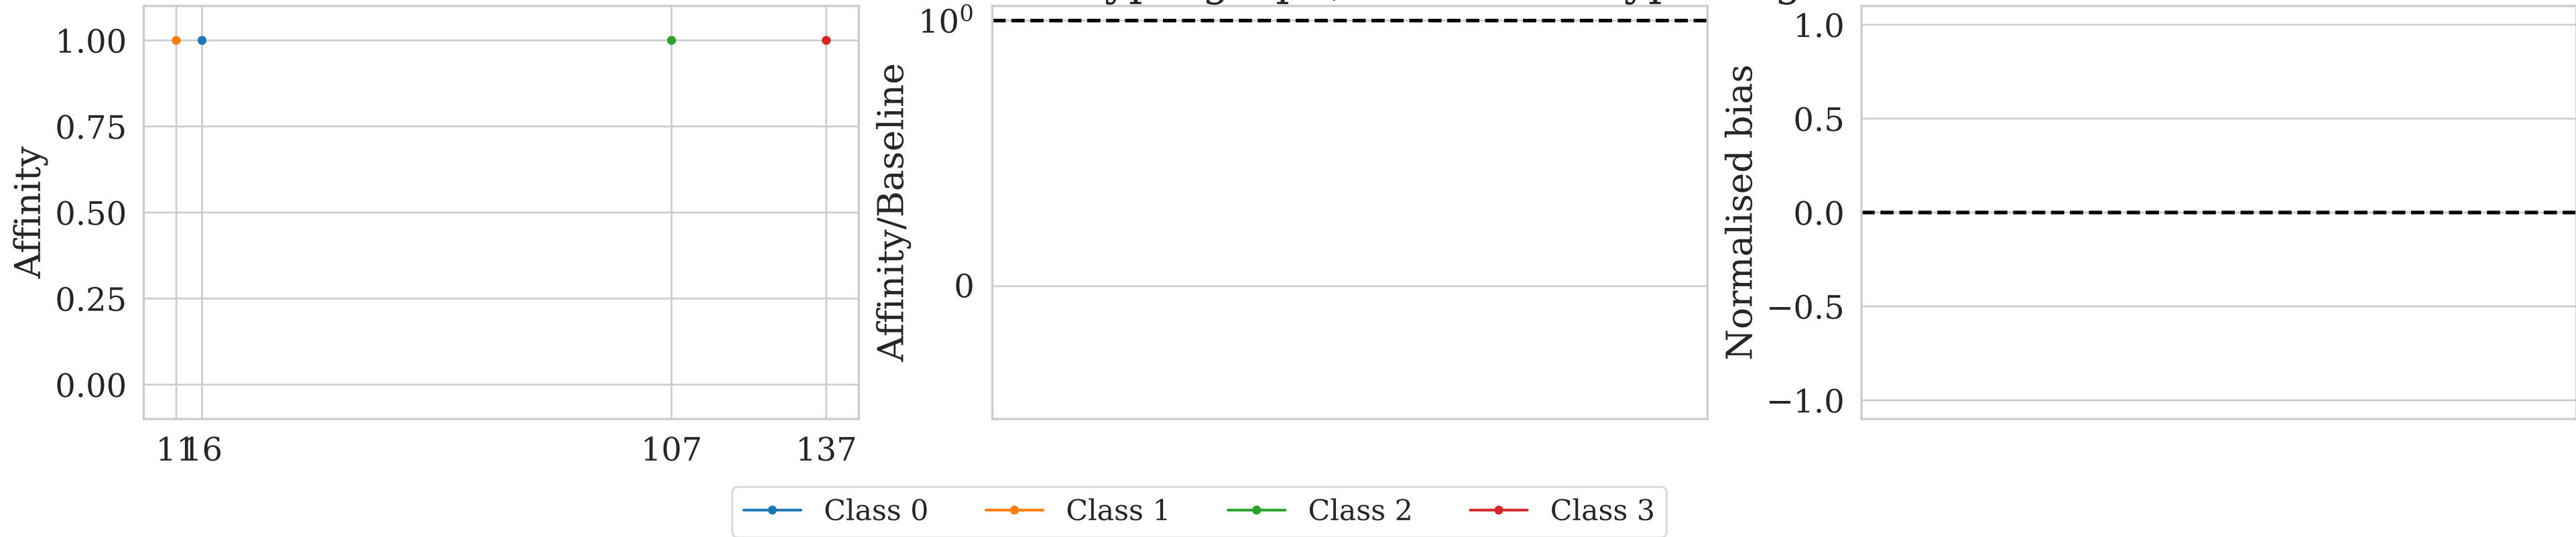

2241-uniform hypergraph, number of hyperedges: 1

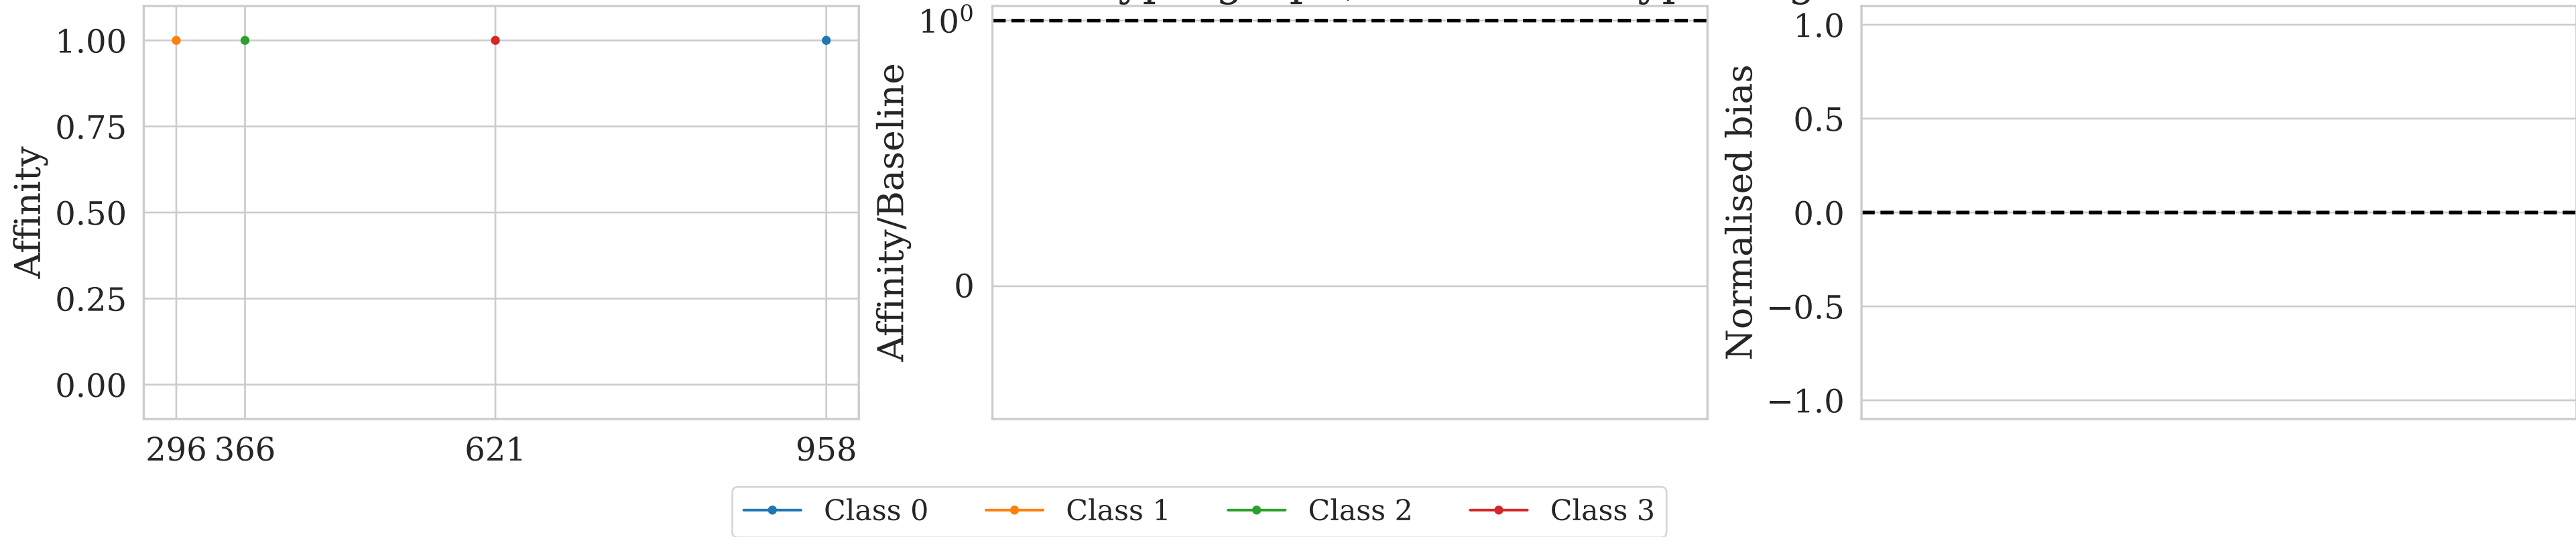

2193-uniform hypergraph, number of hyperedges: 1

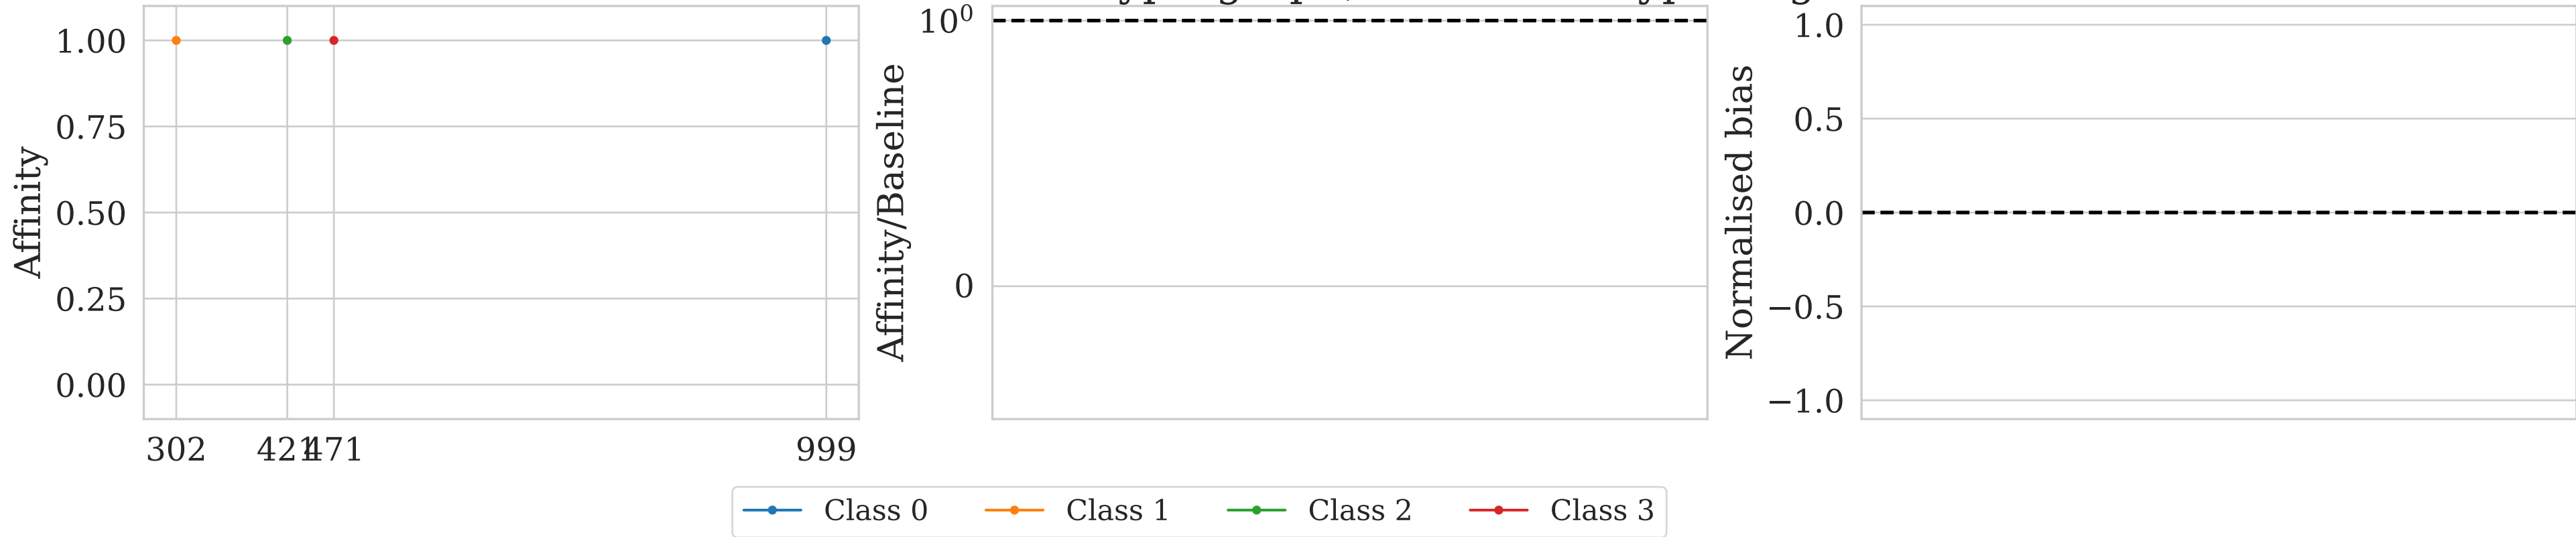

146-uniform hypergraph, number of hyperedges: 1

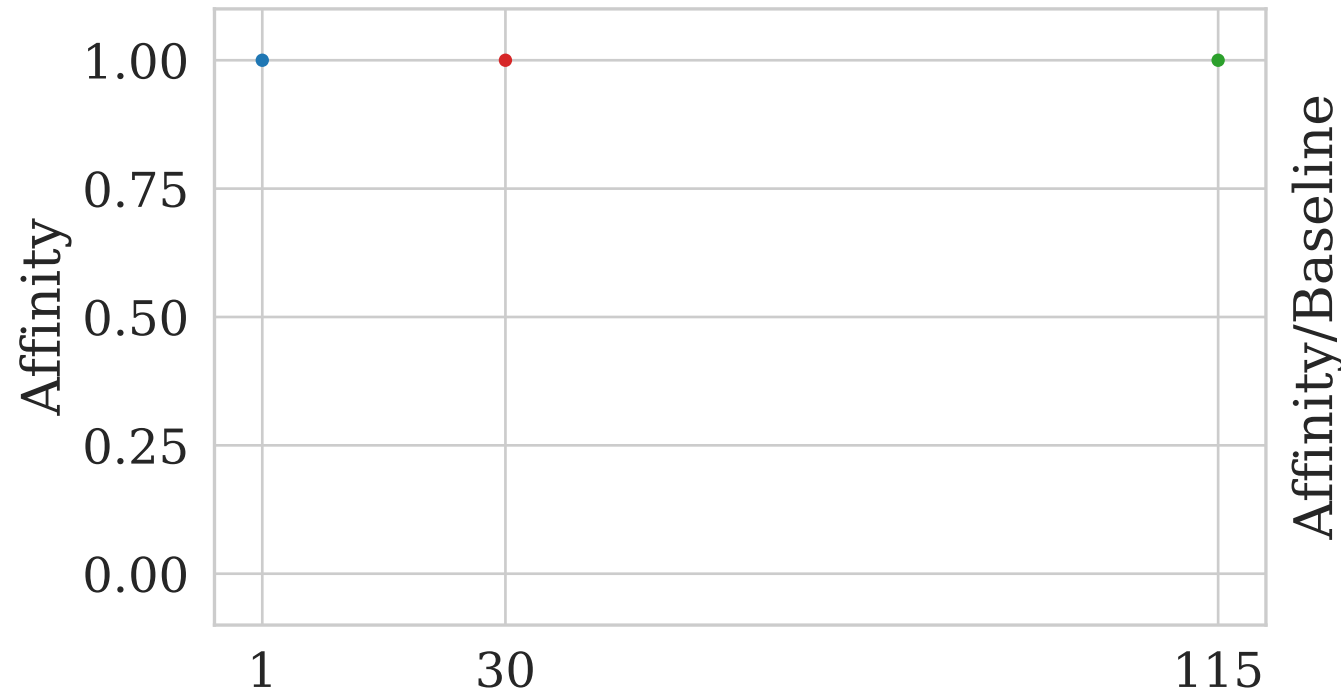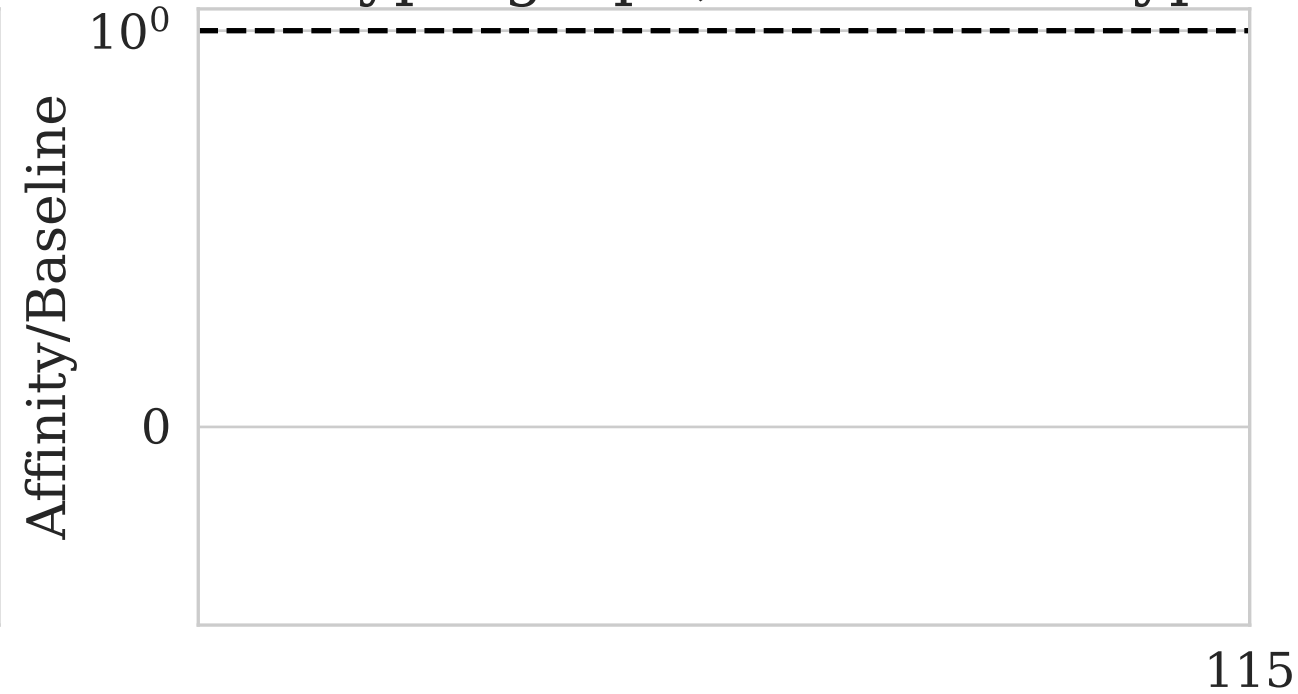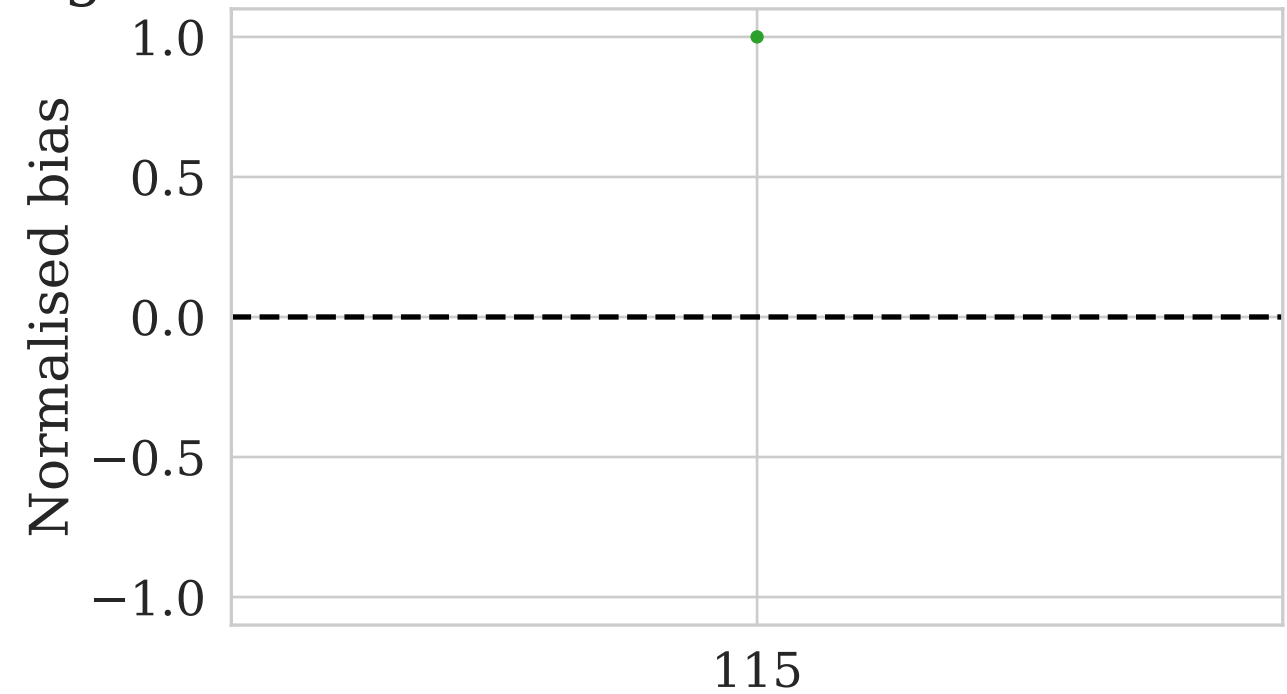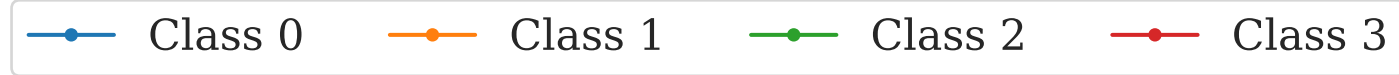

68-uniform hypergraph, number of hyperedges: 1

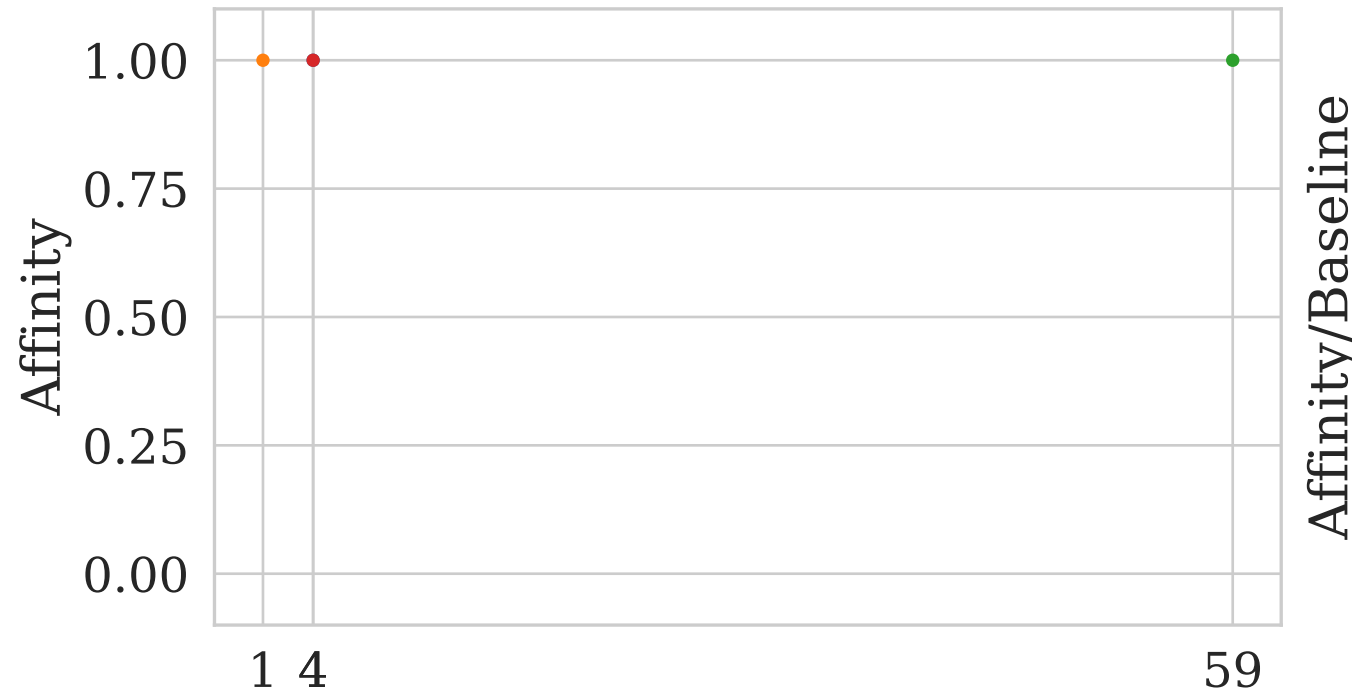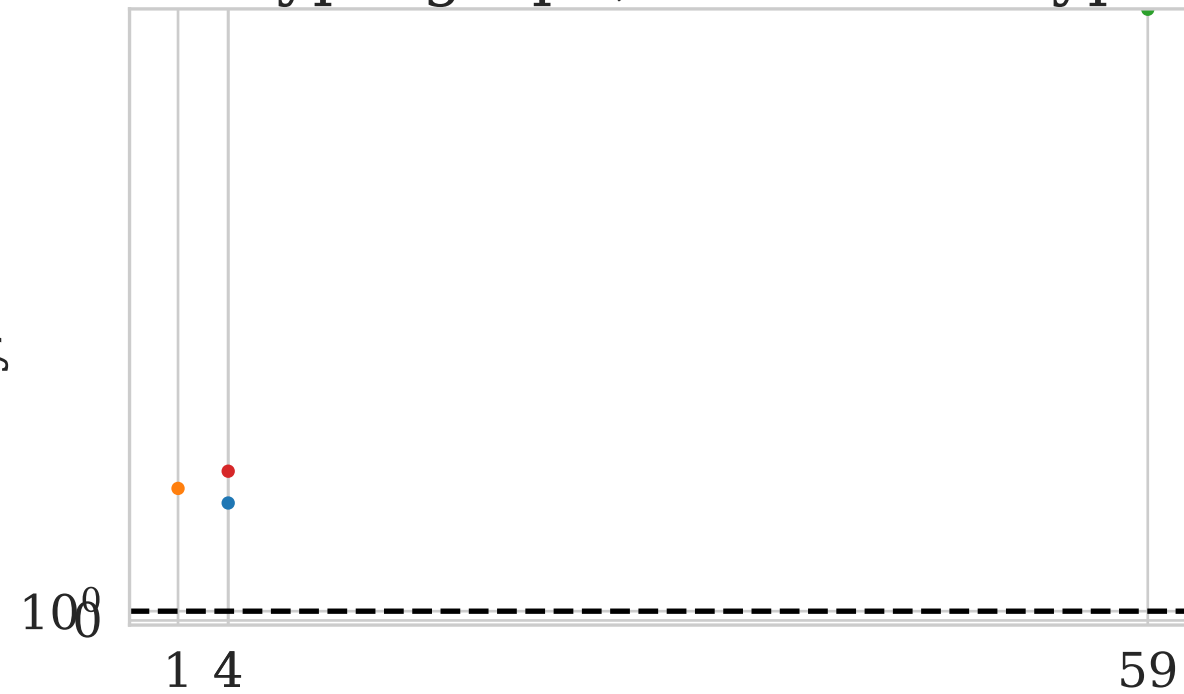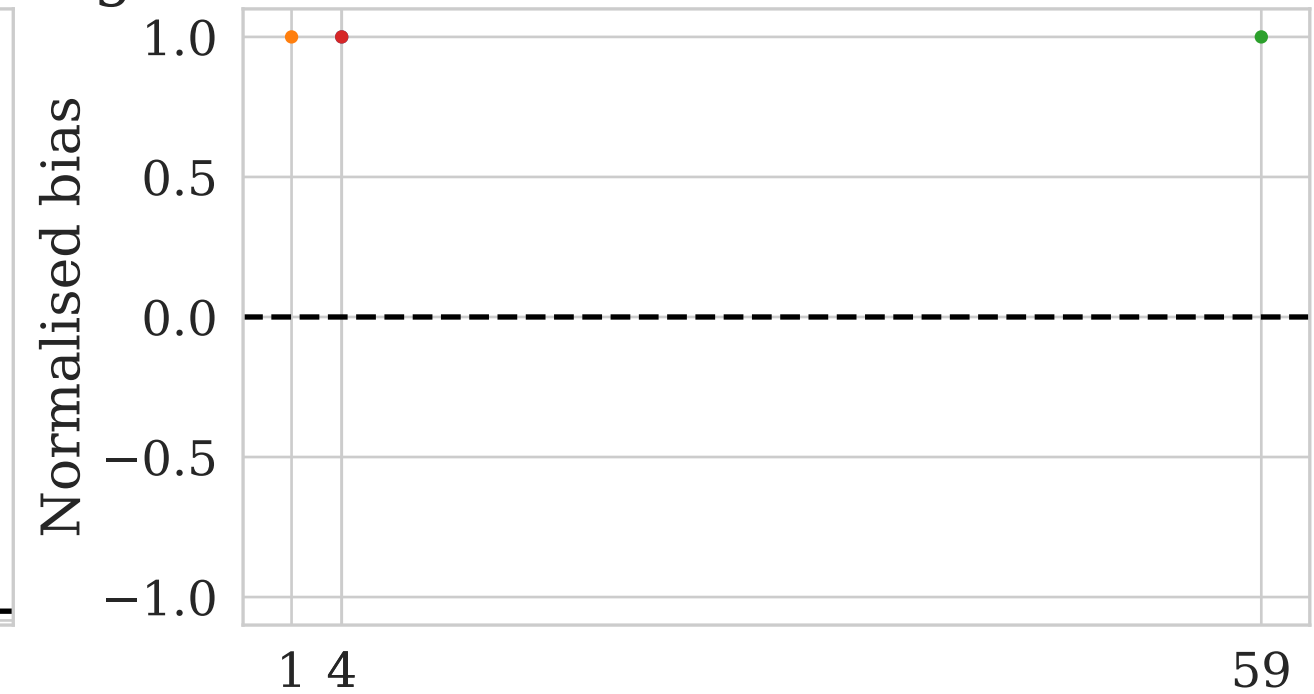

Class 0 Class 1 Class 2 Class 3

74-uniform hypergraph, number of hyperedges: 1

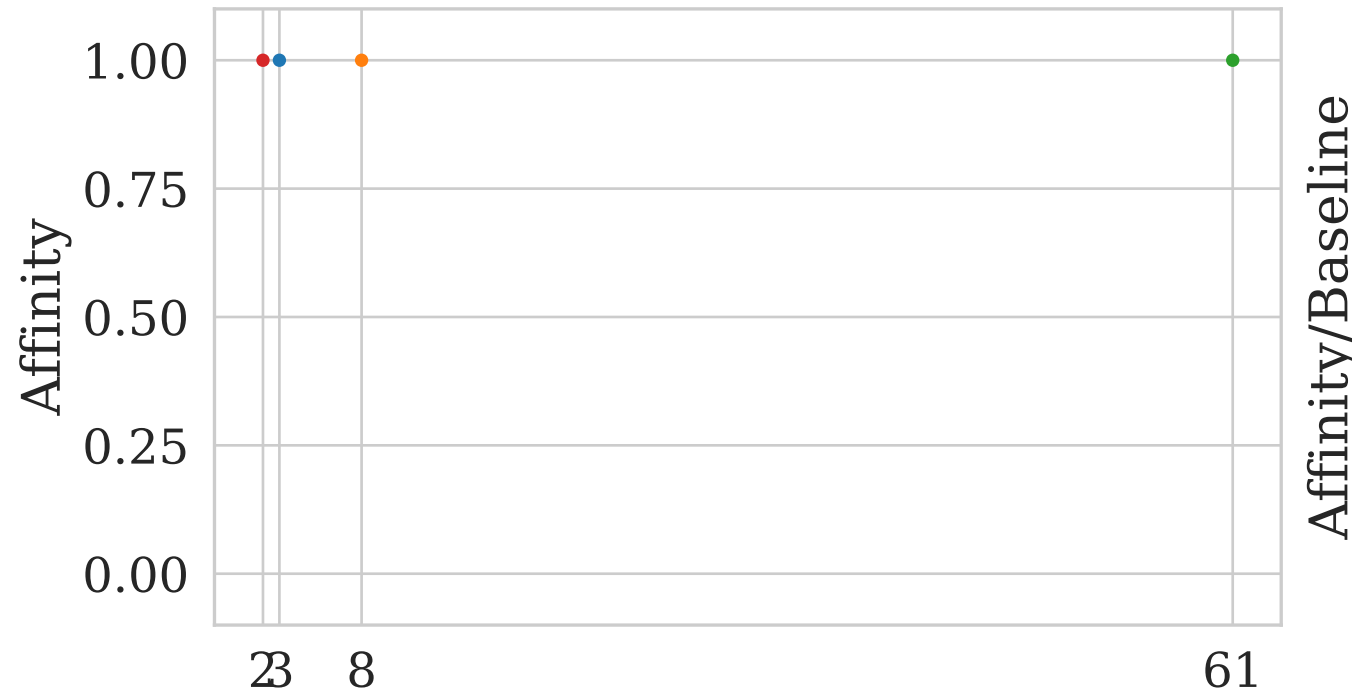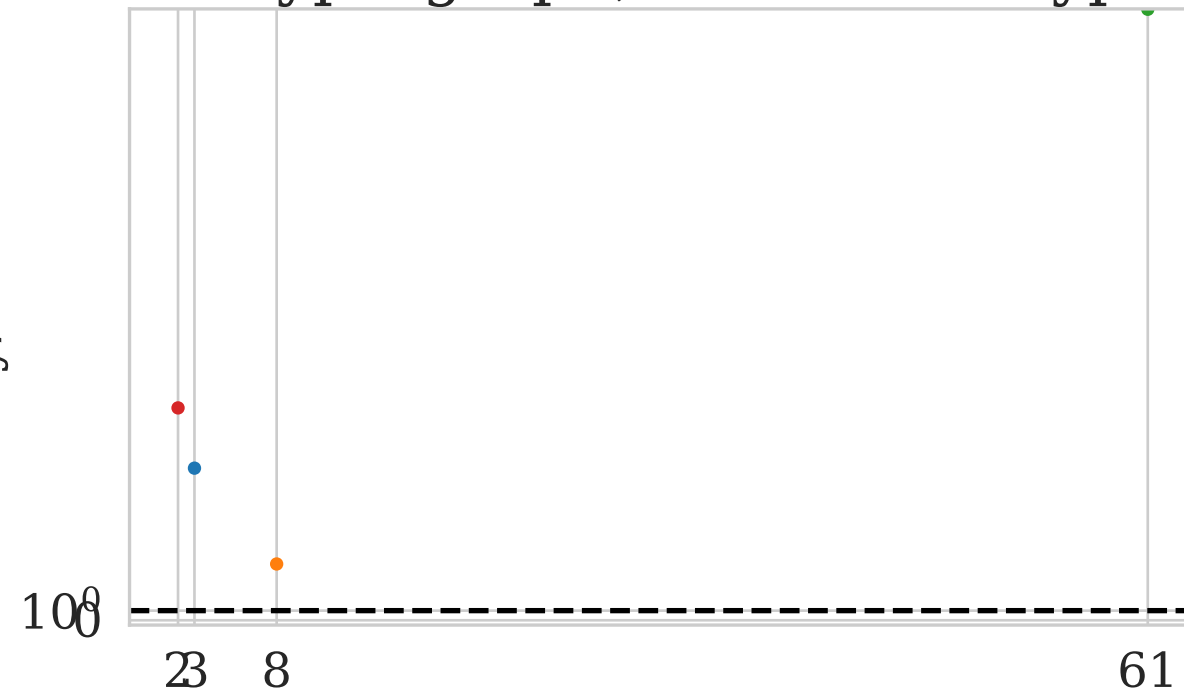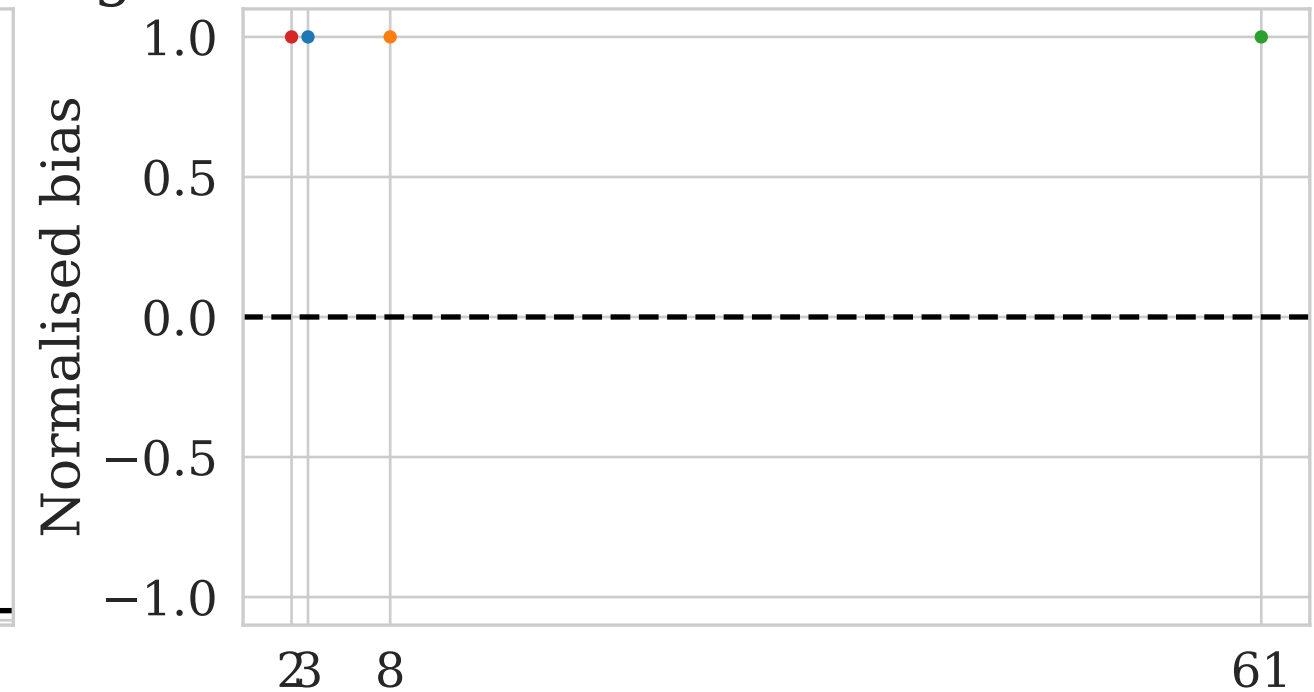

Class 0 Class 1 Class 2 Class 3

75-uniform hypergraph, number of hyperedges: 1

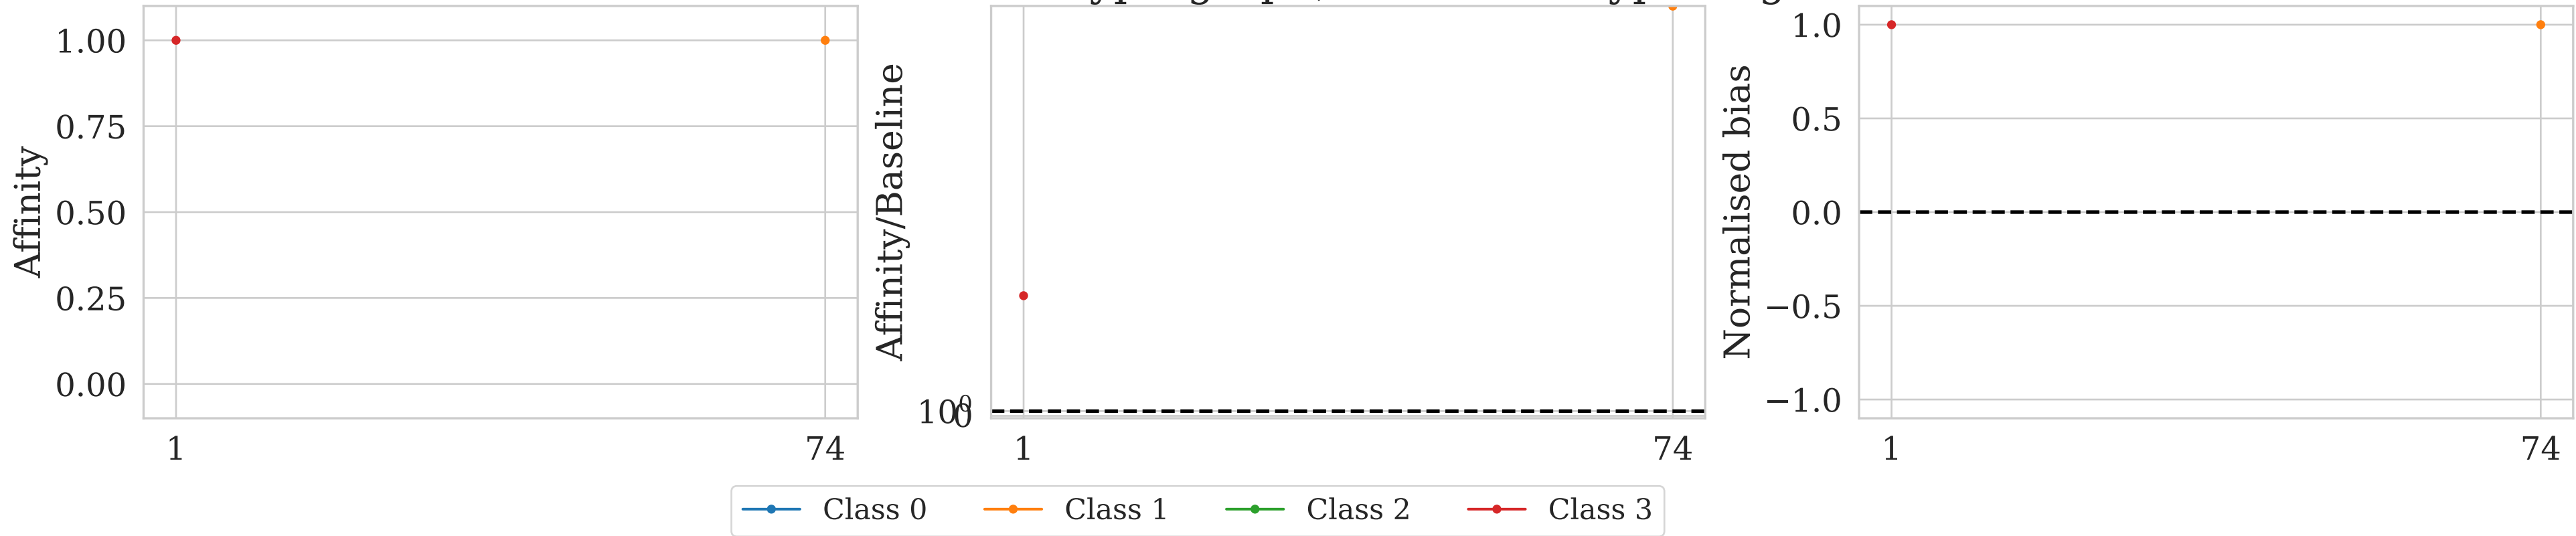

80-uniform hypergraph, number of hyperedges: 1

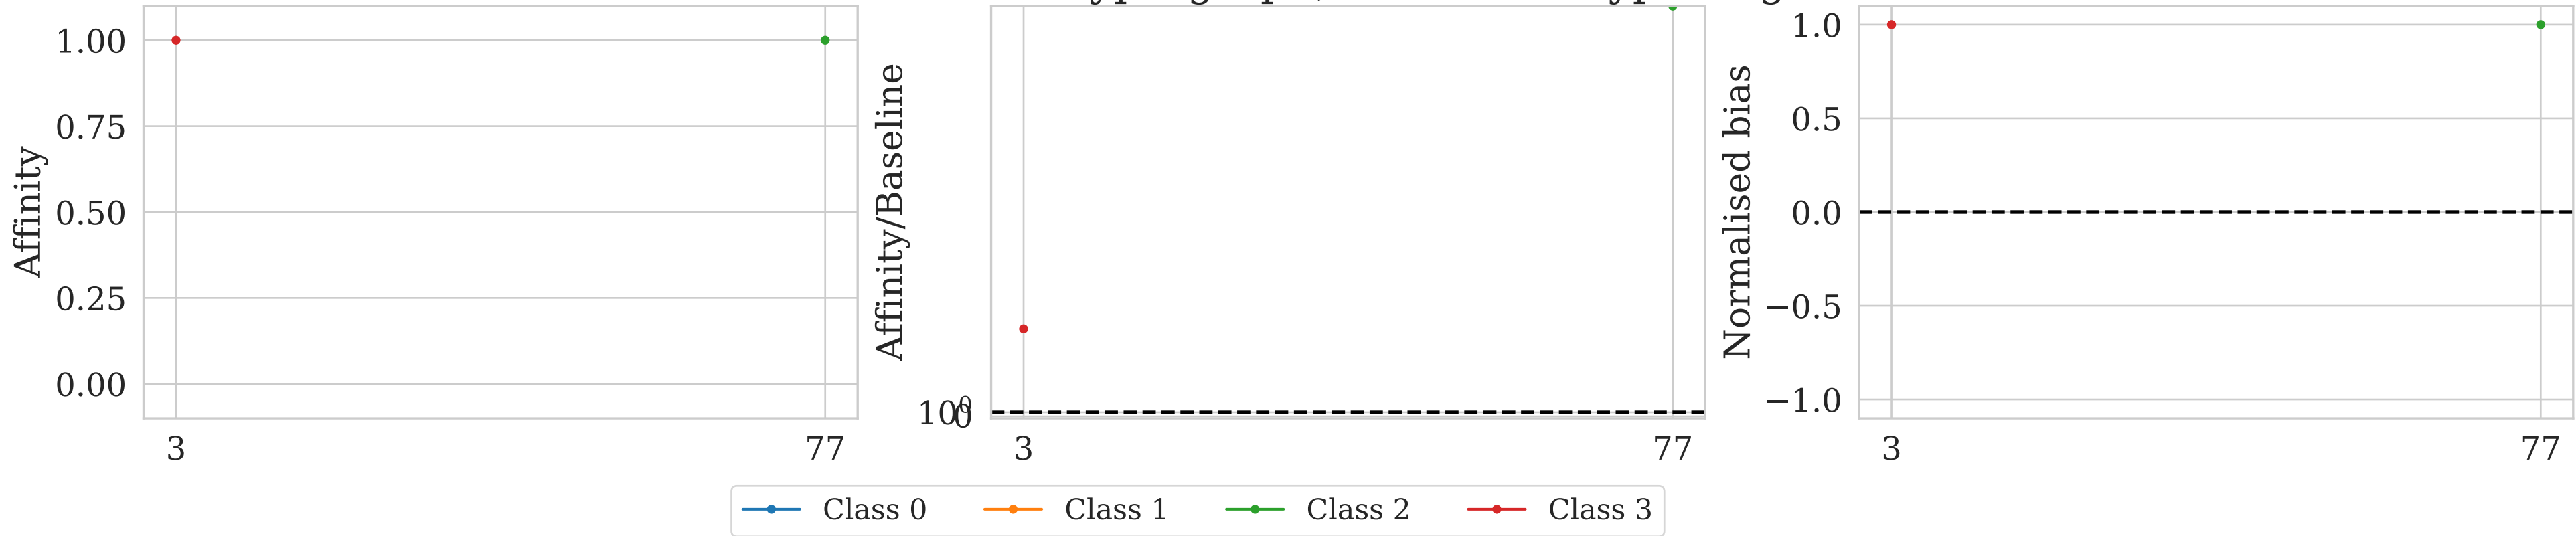



97-uniform hypergraph, number of hyperedges: 1

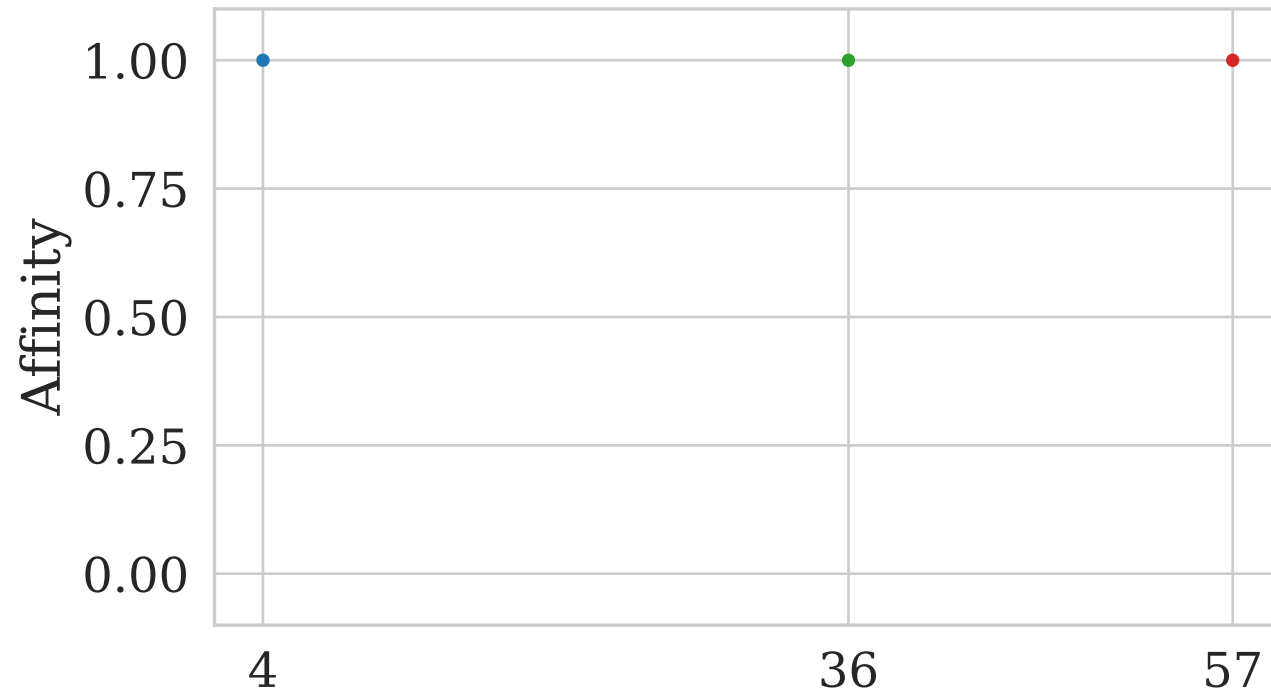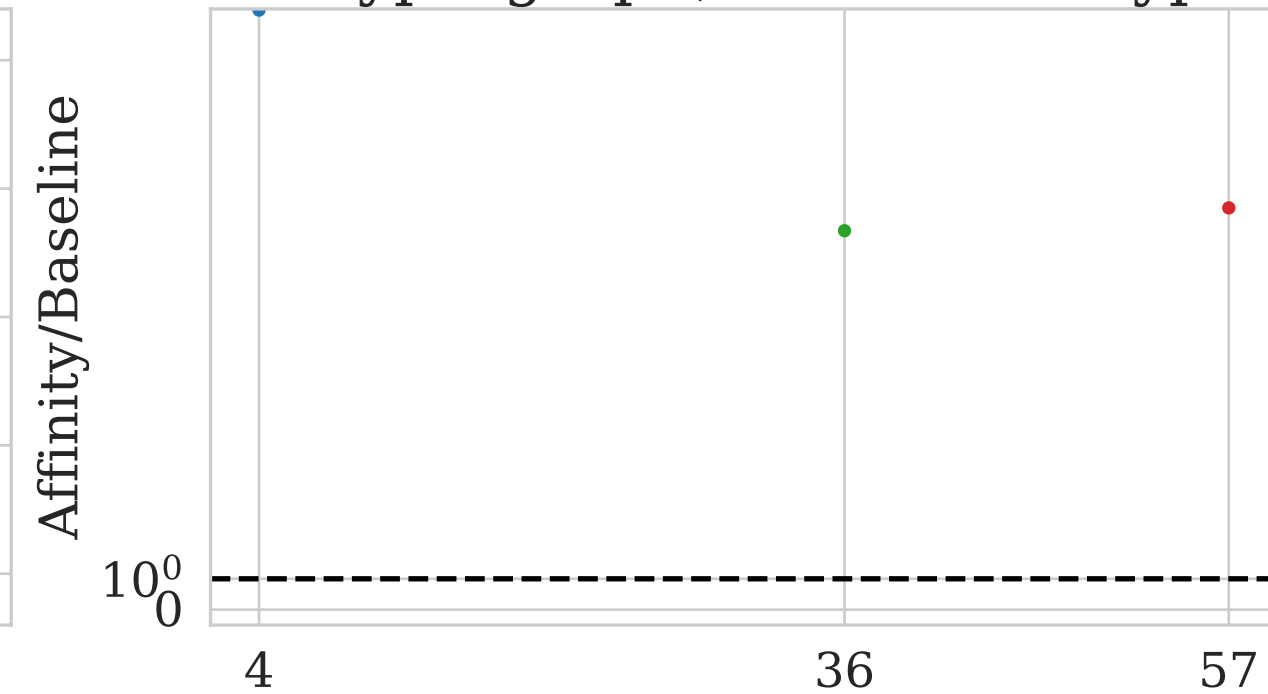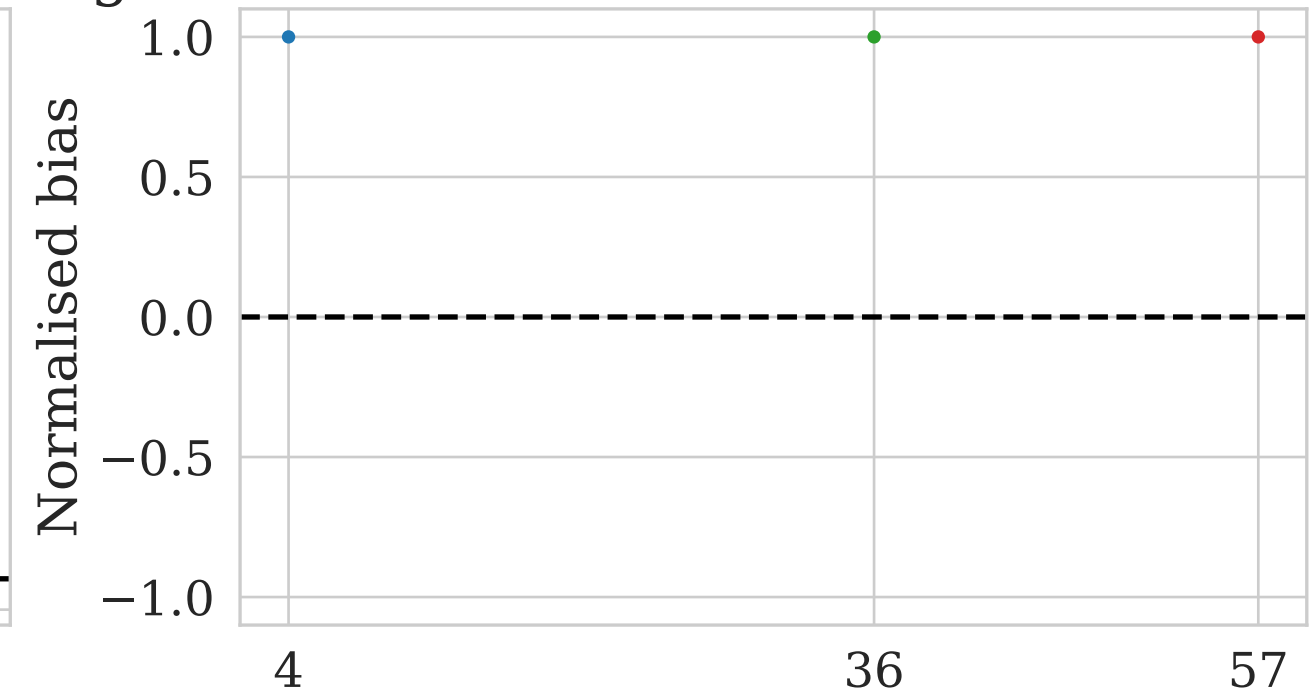

Class 0 Class 1 Class 2 Class 3

100-uniform hypergraph, number of hyperedges: 1

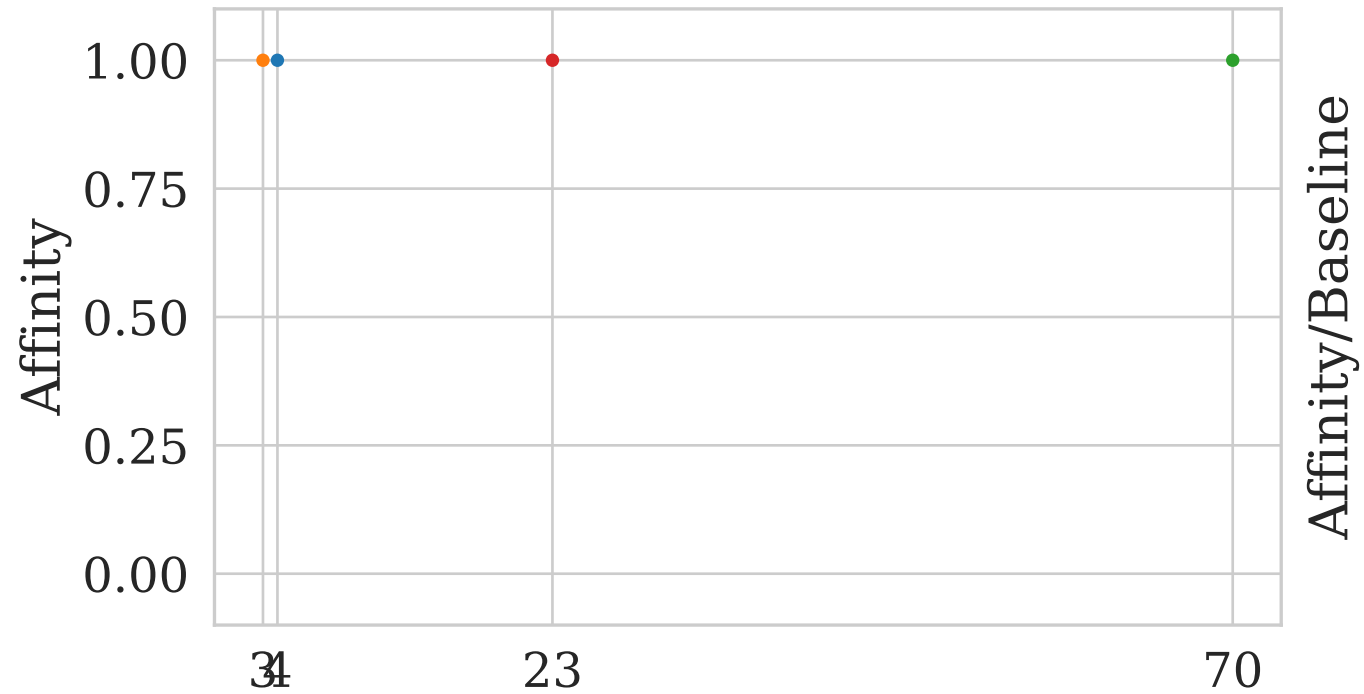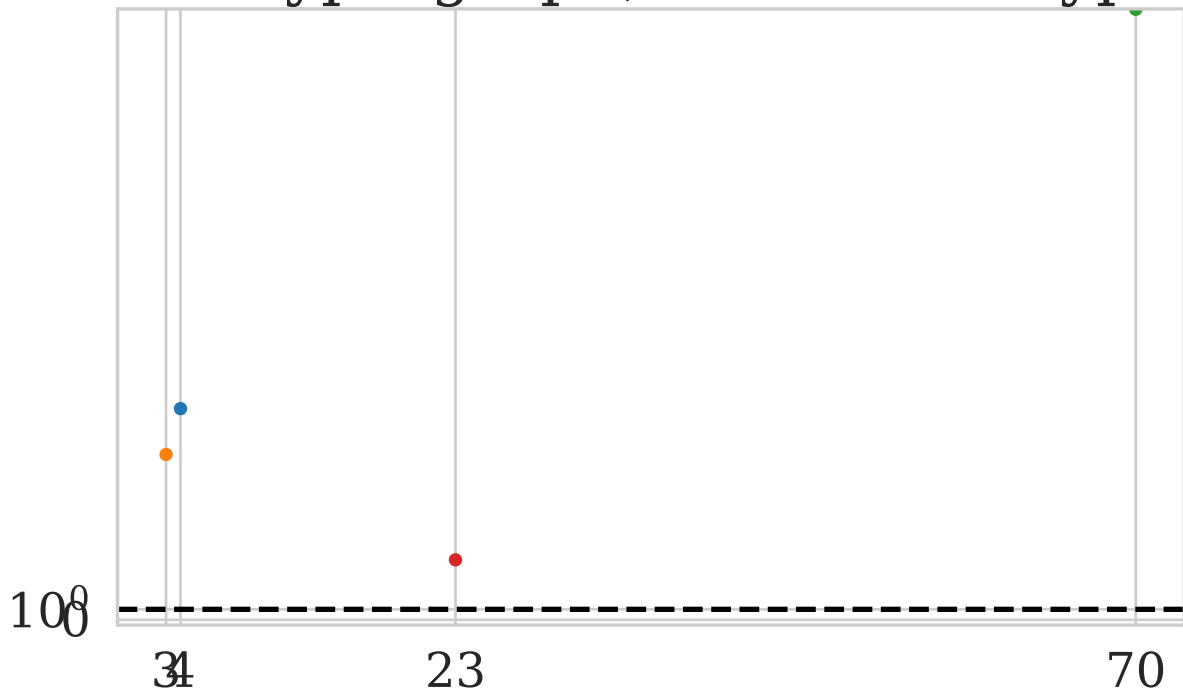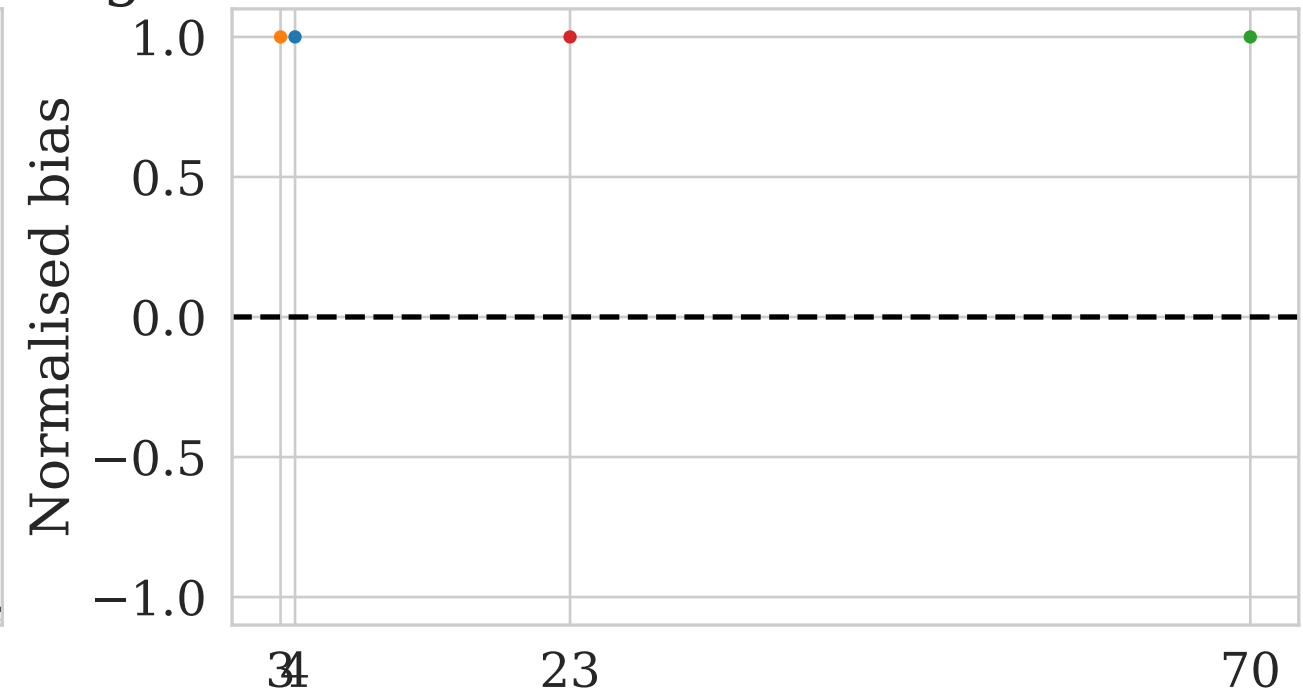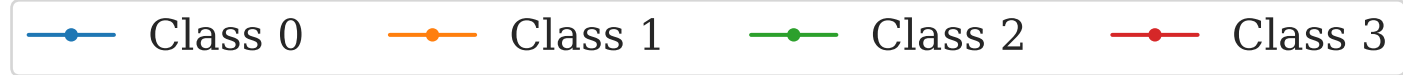

131-uniform hypergraph, number of hyperedges: 1

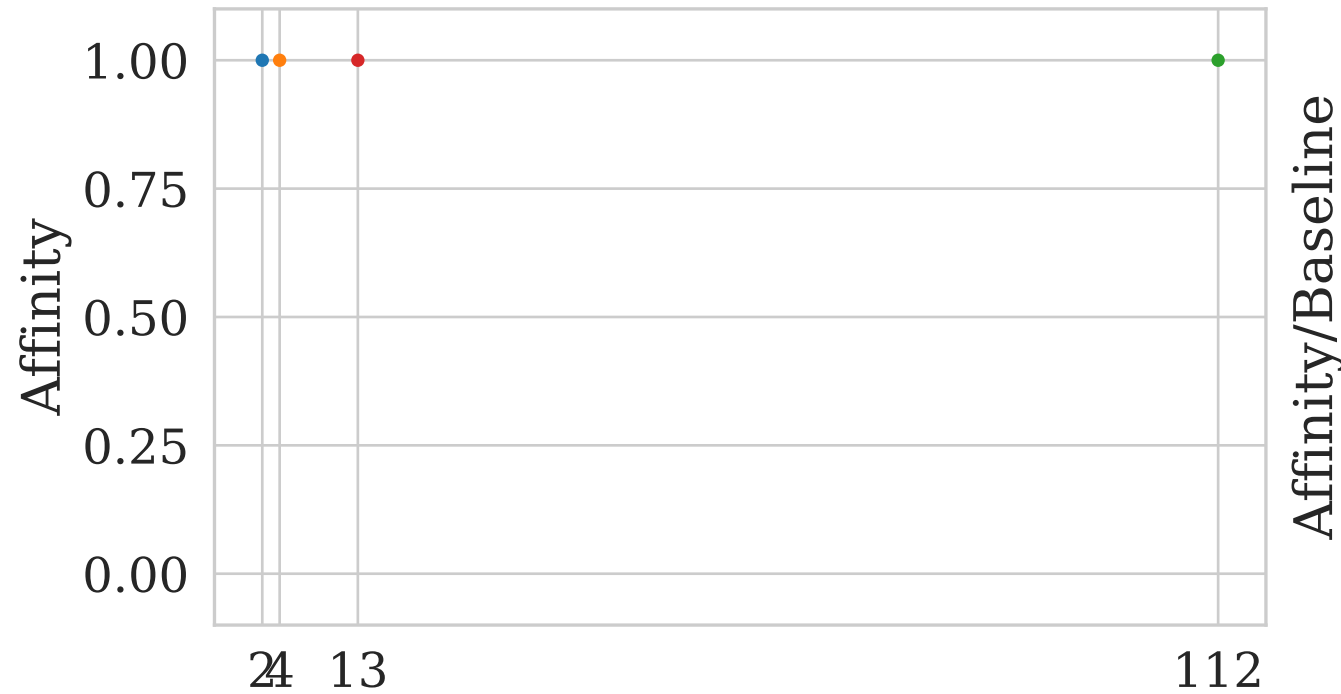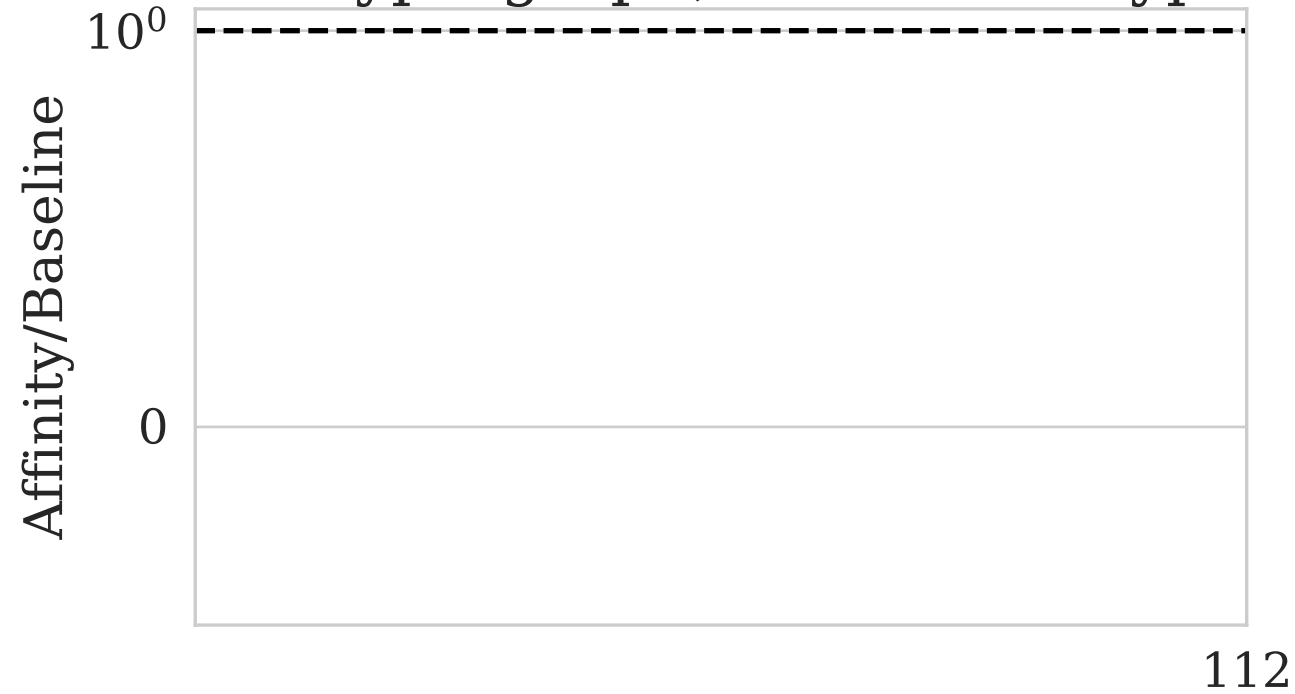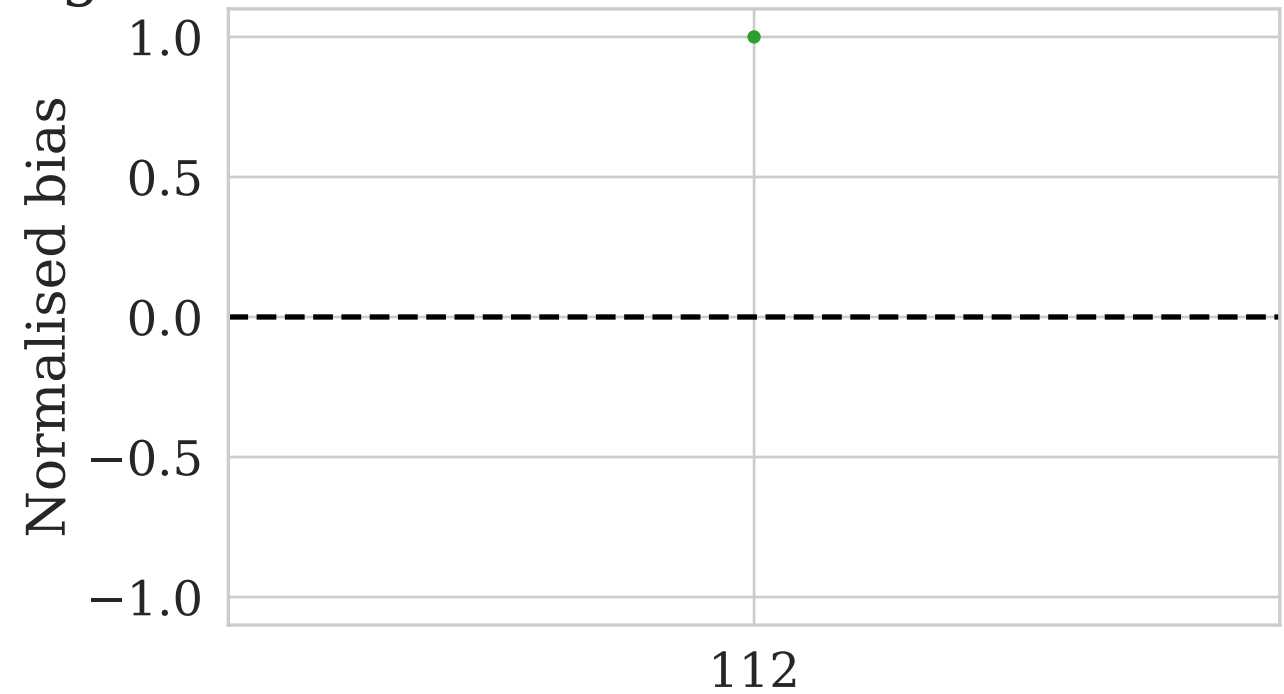

134-uniform hypergraph, number of hyperedges: 1

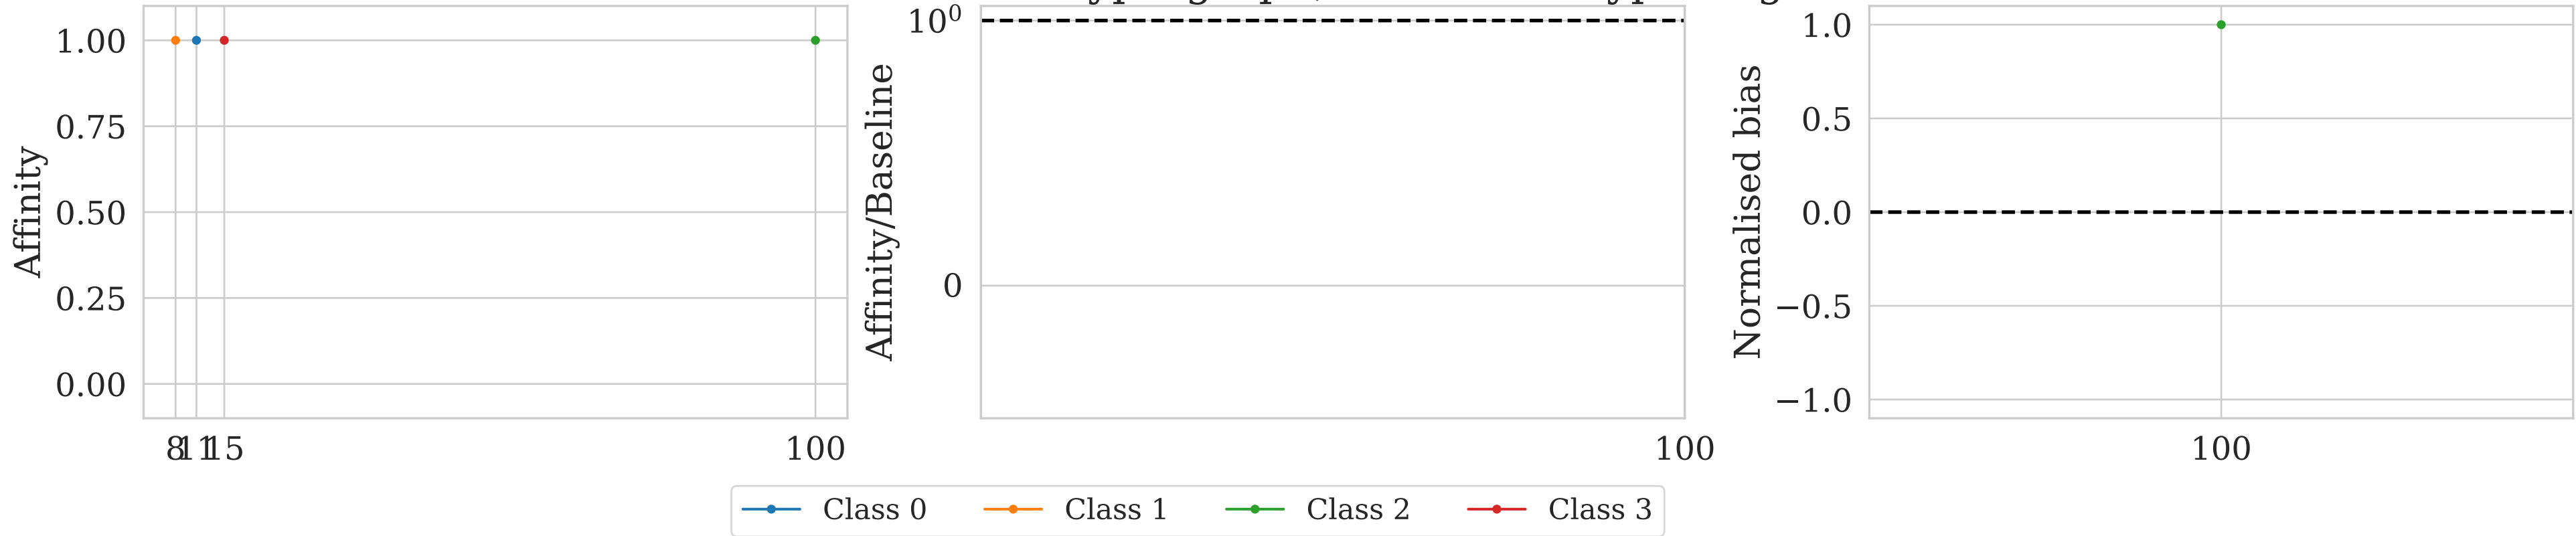

144-uniform hypergraph, number of hyperedges: 1

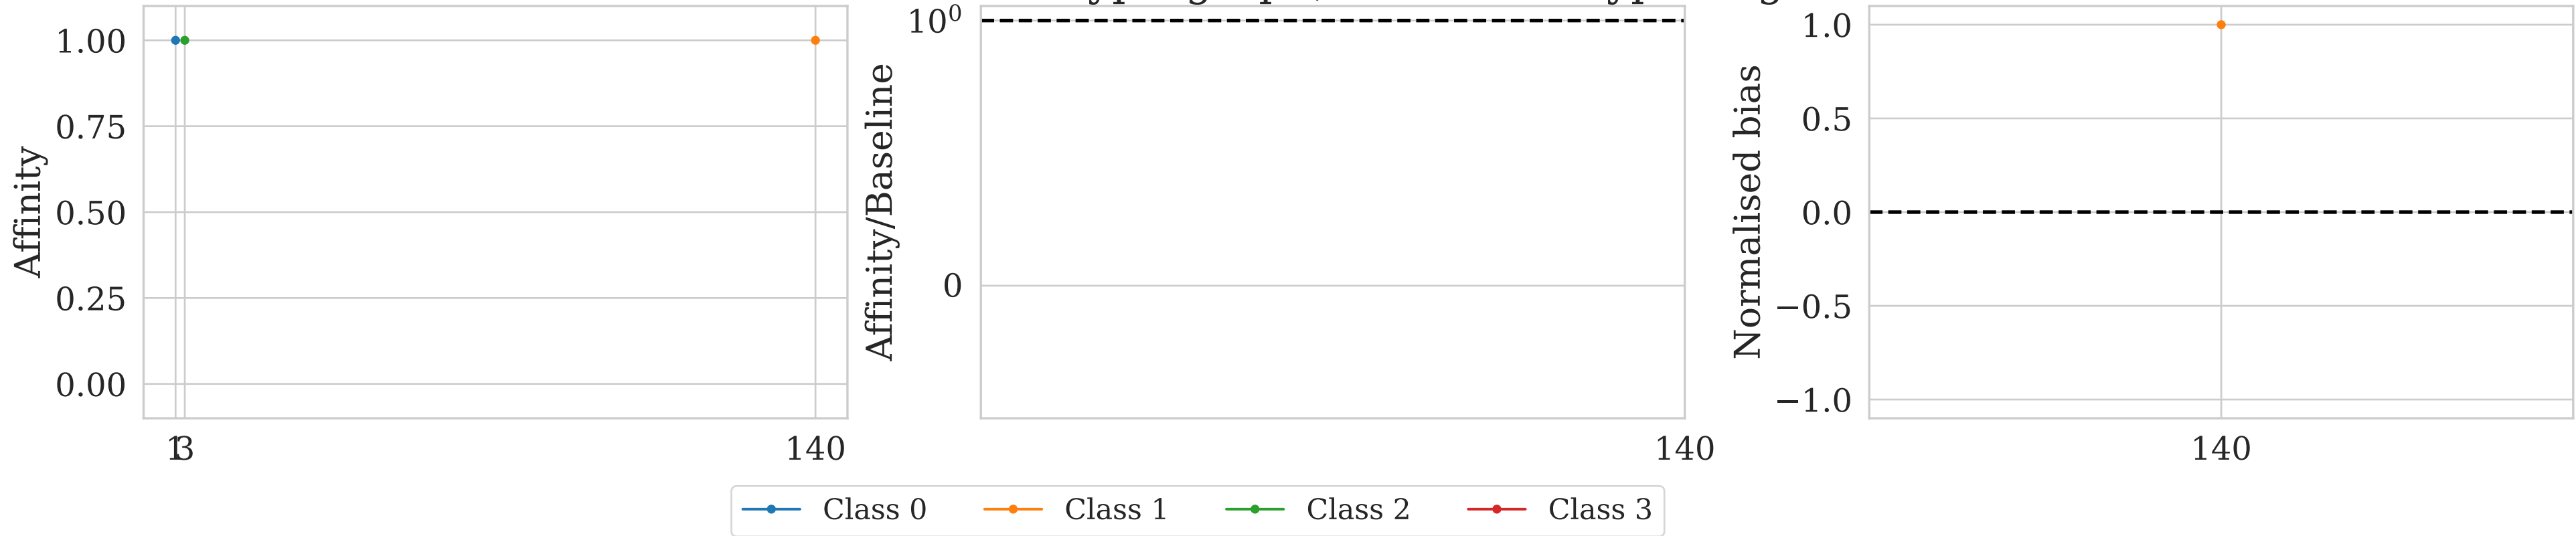

175-uniform hypergraph, number of hyperedges: 1

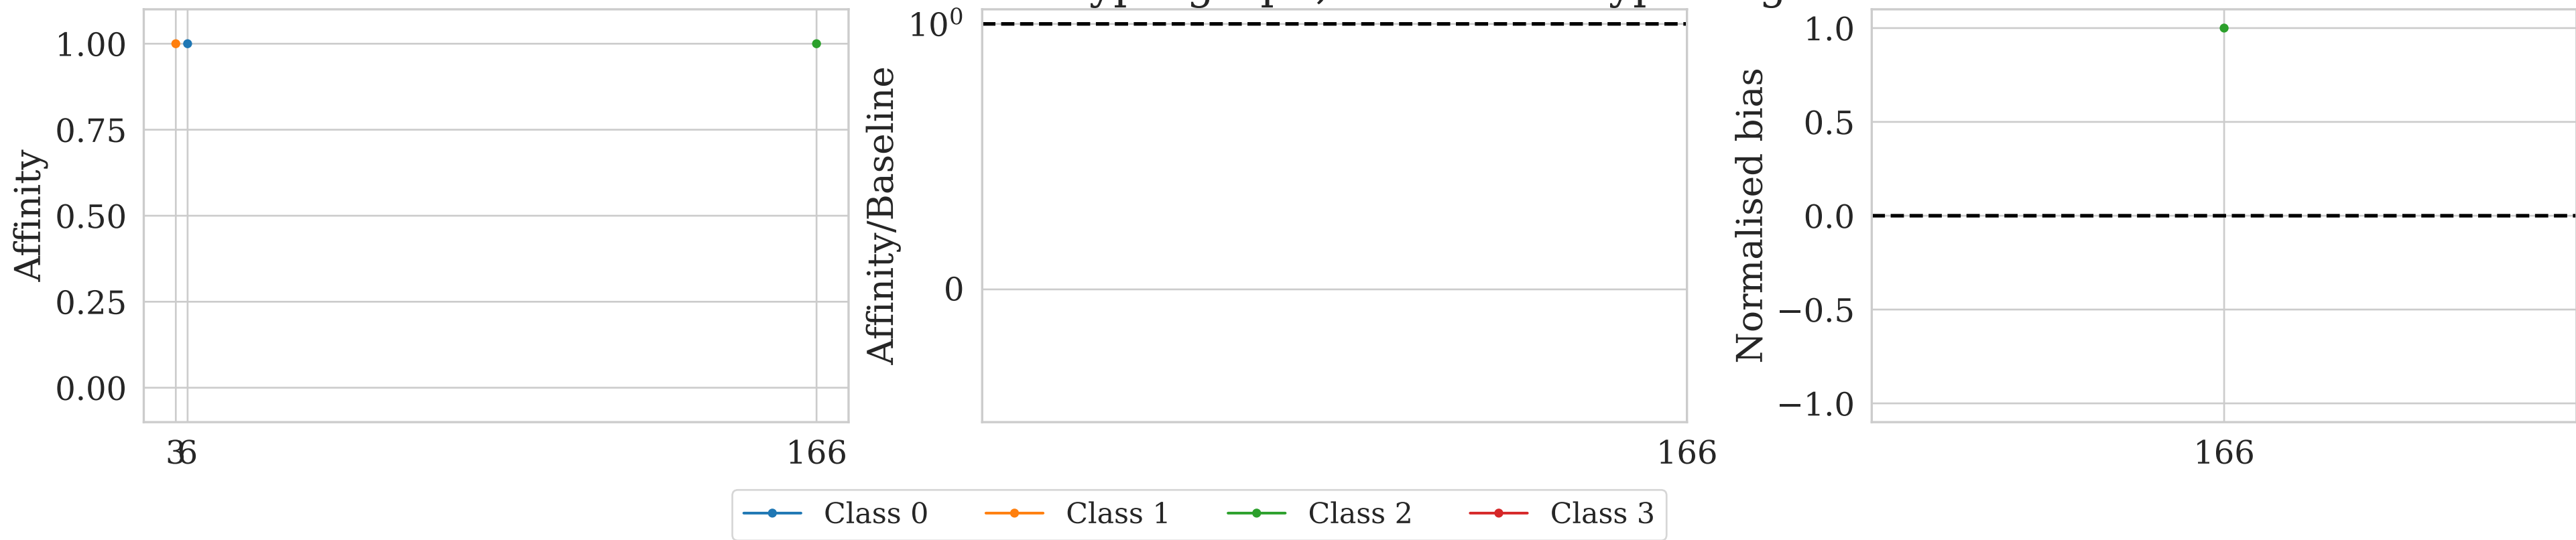

253-uniform hypergraph, number of hyperedges: 1

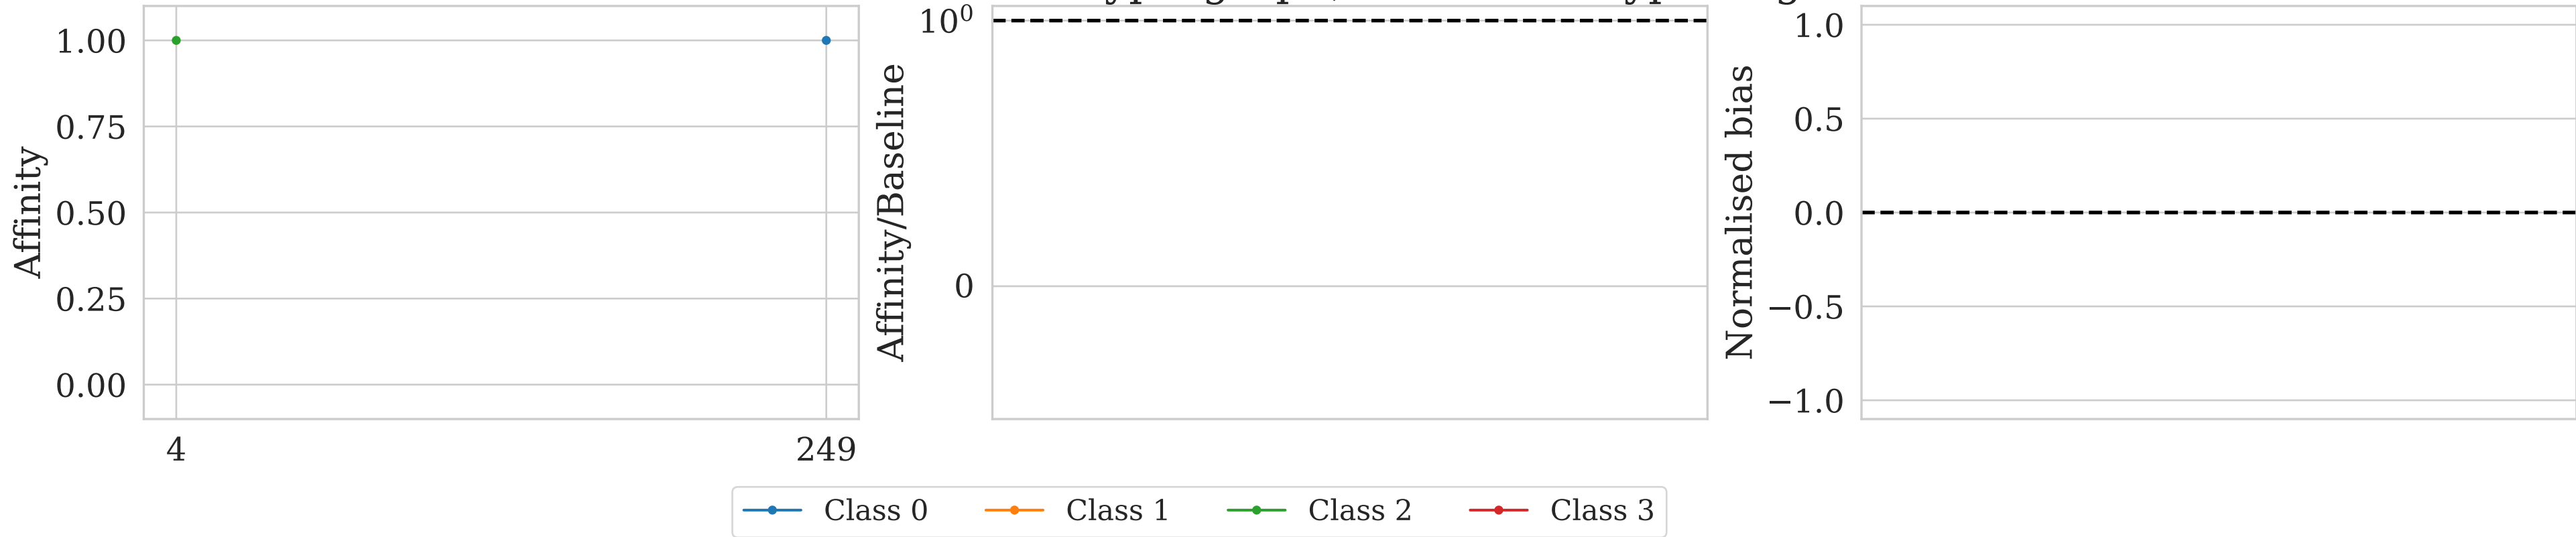

188-uniform hypergraph, number of hyperedges: 1

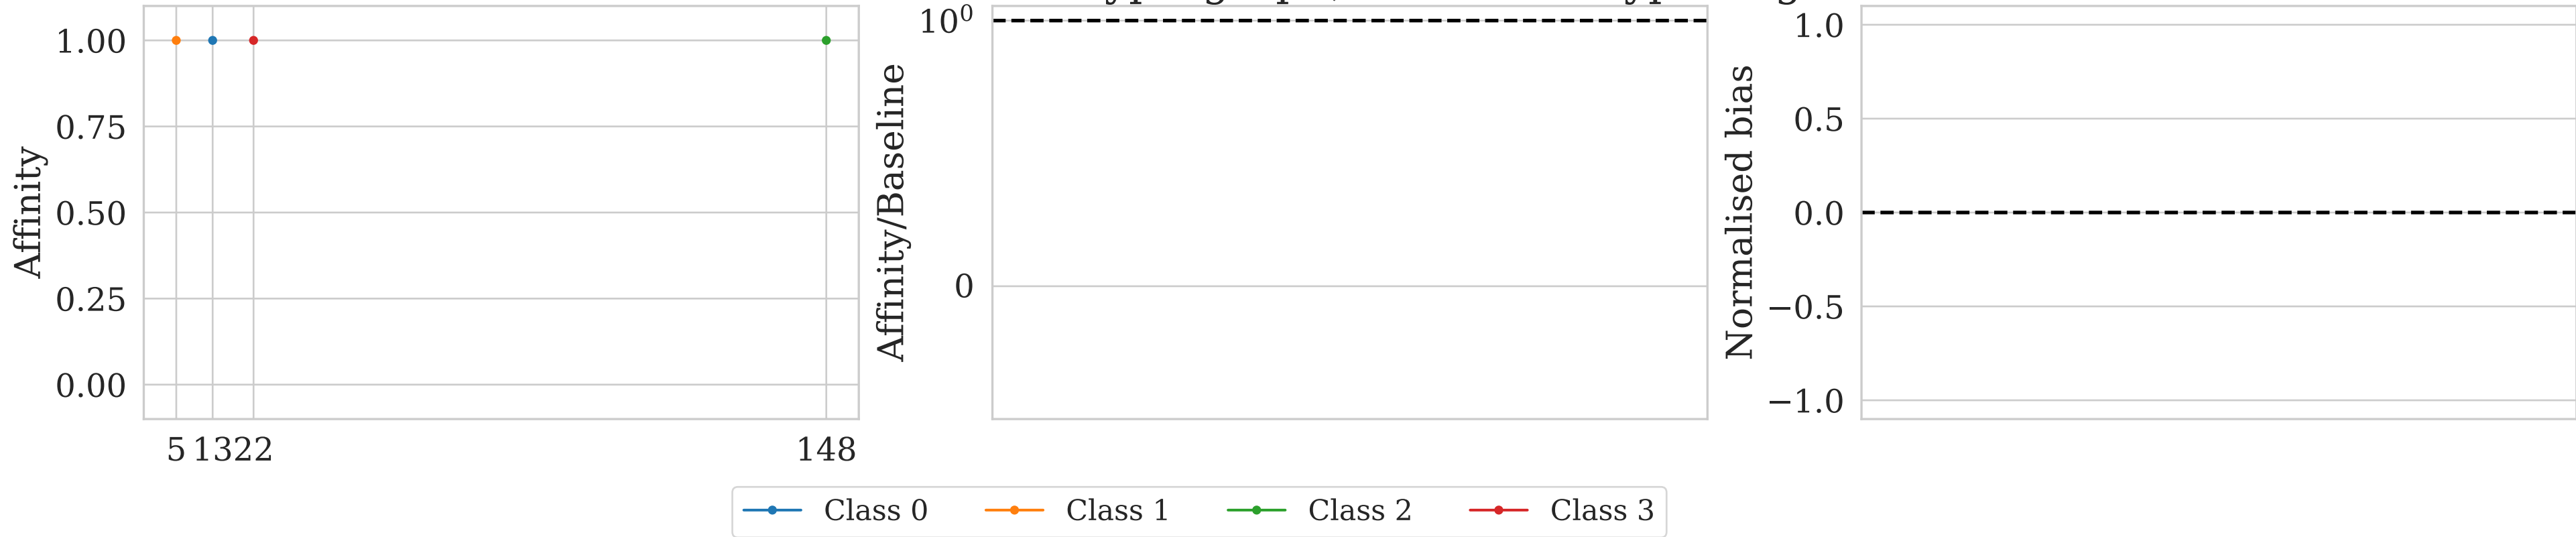



203-uniform hypergraph, number of hyperedges: 1

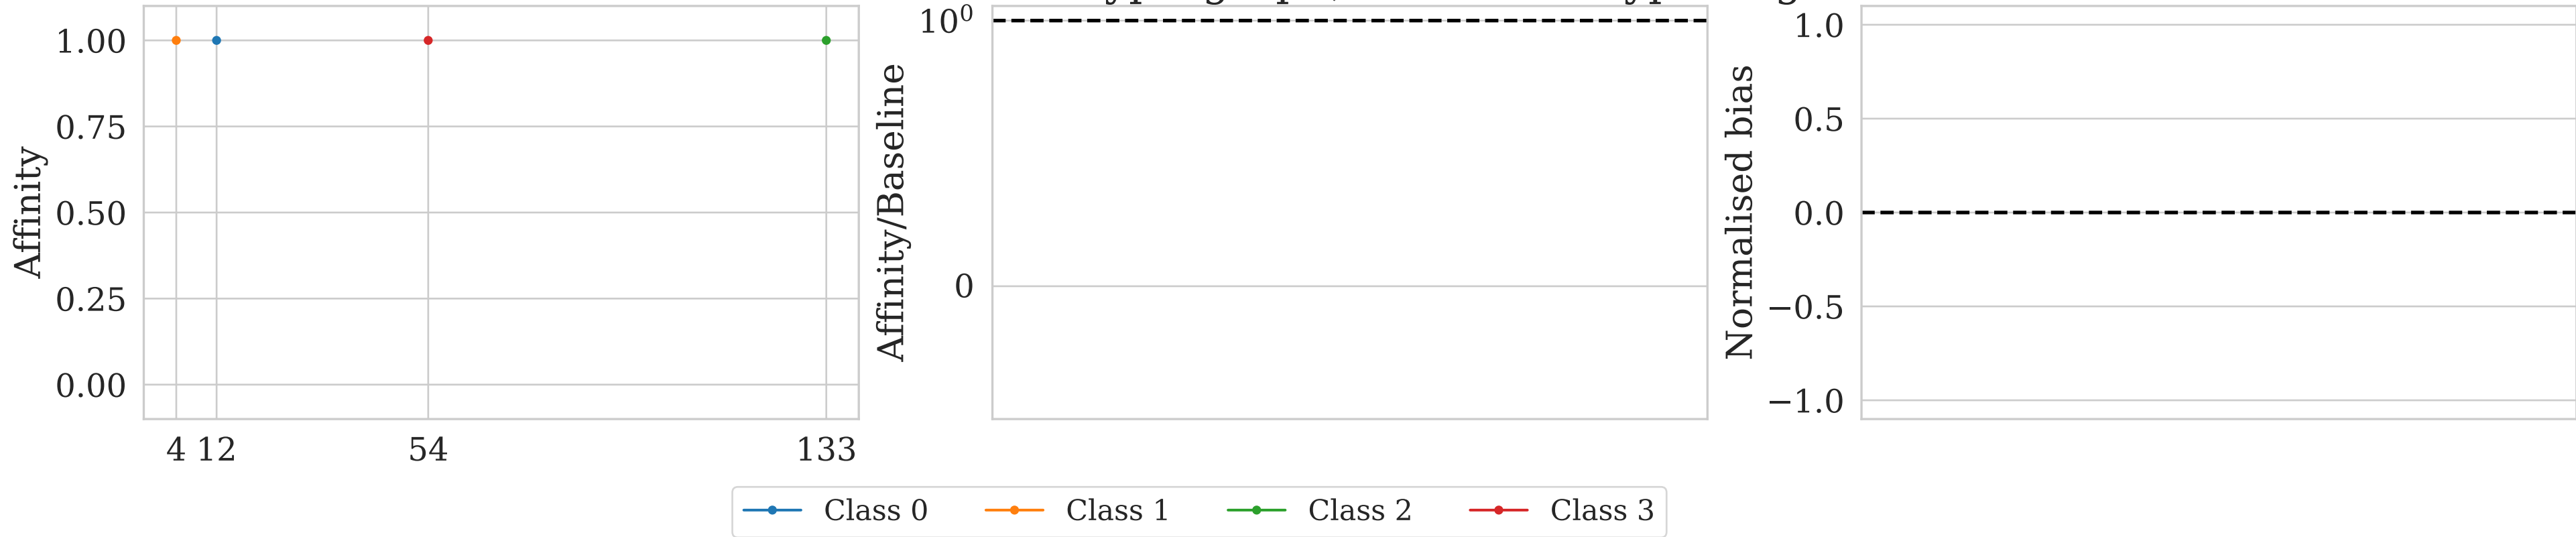

213-uniform hypergraph, number of hyperedges: 1

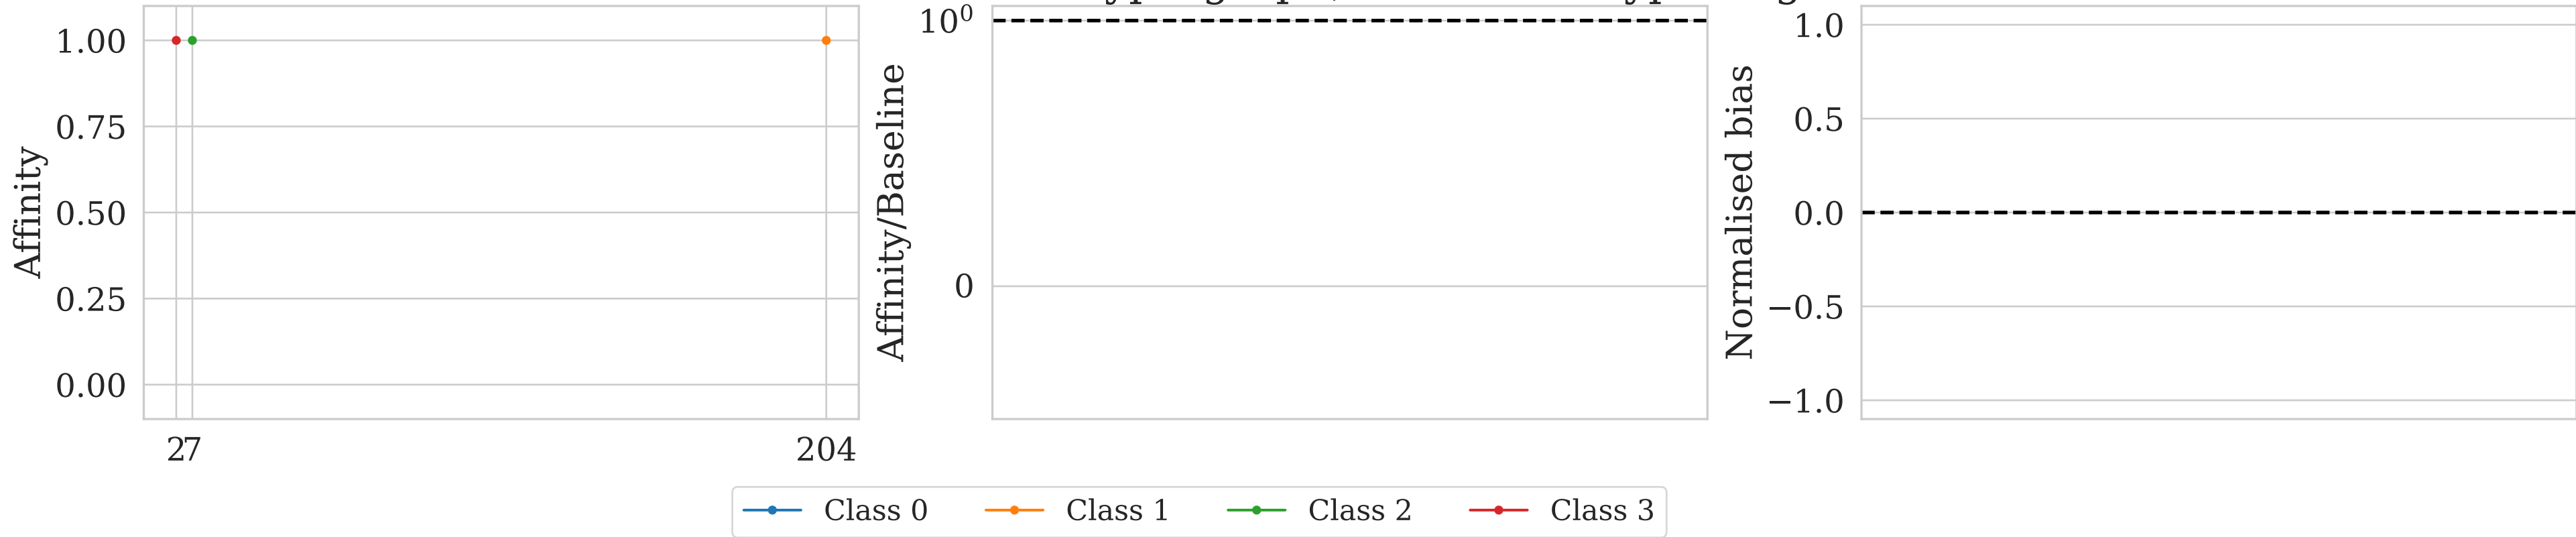

218-uniform hypergraph, number of hyperedges: 1

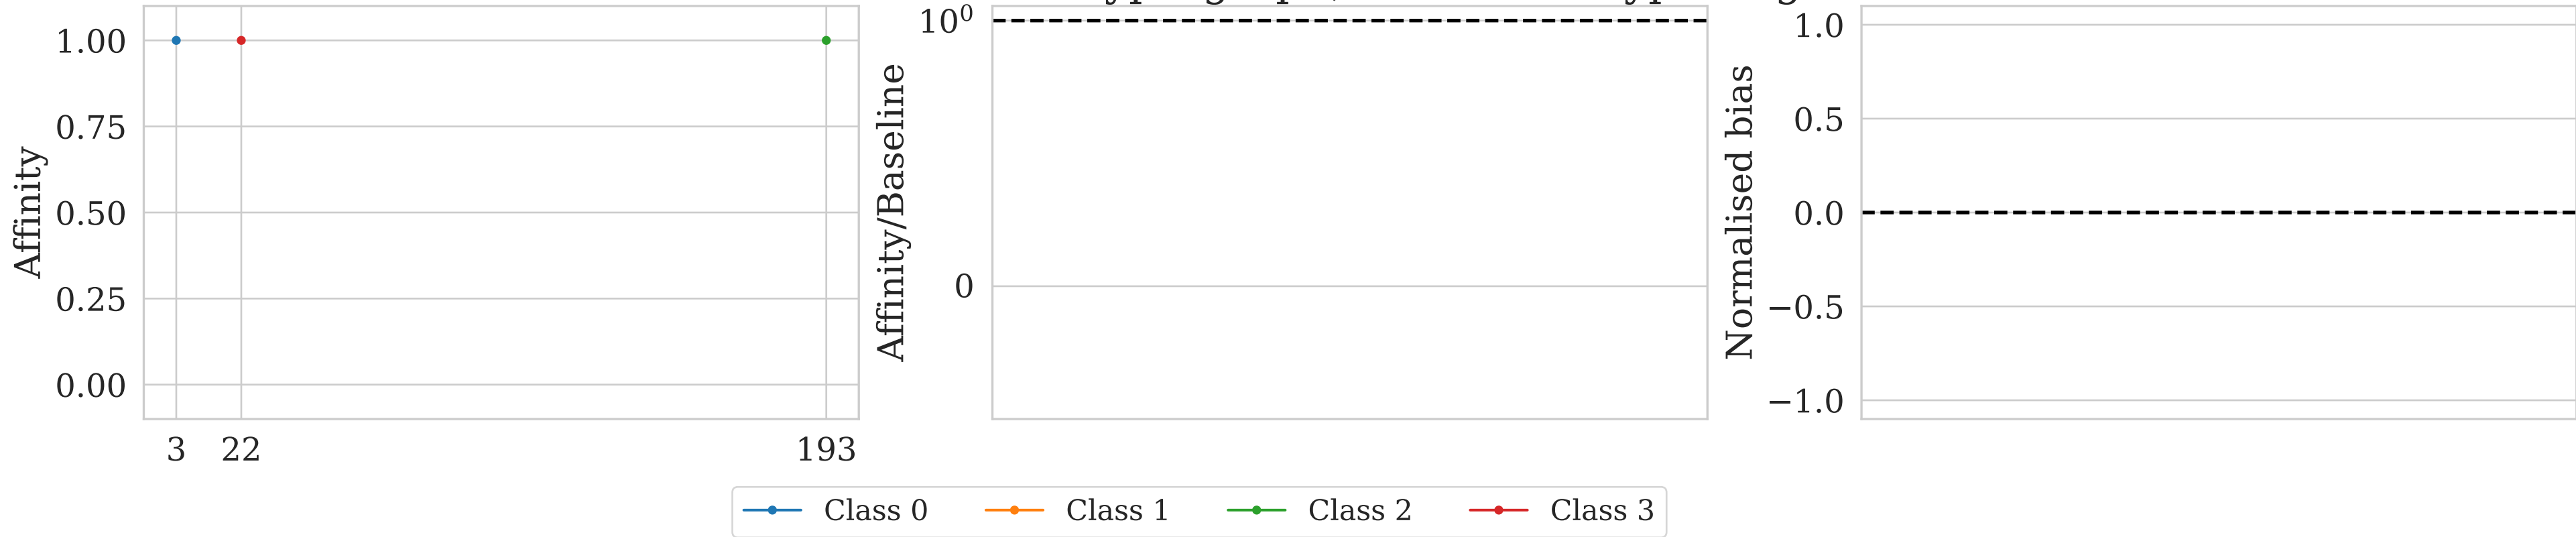

220-uniform hypergraph, number of hyperedges: 1

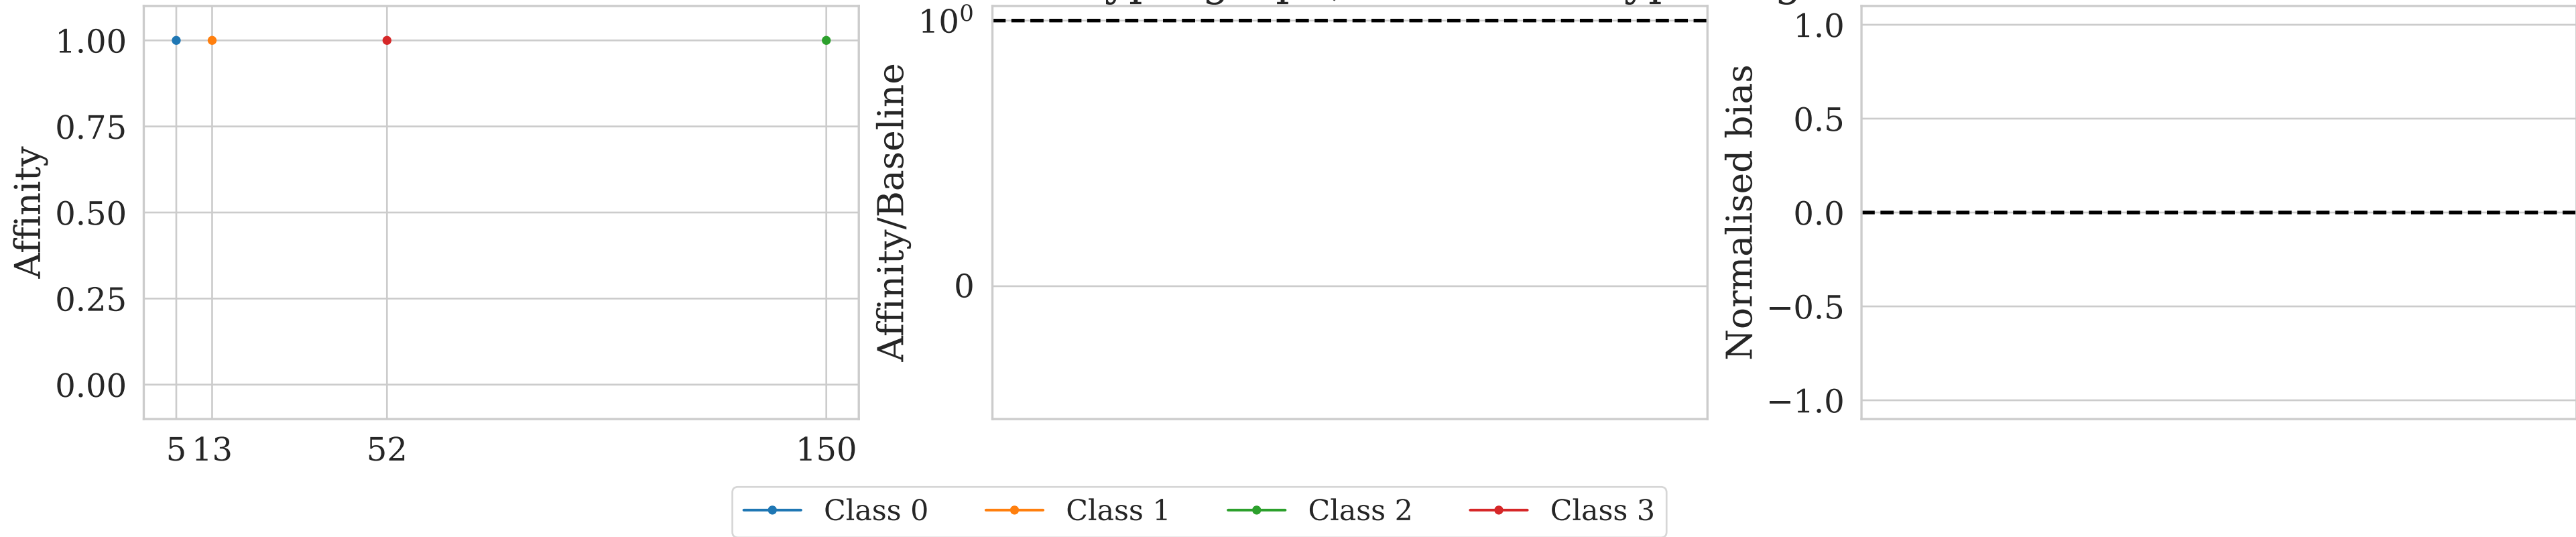

222-uniform hypergraph, number of hyperedges: 1

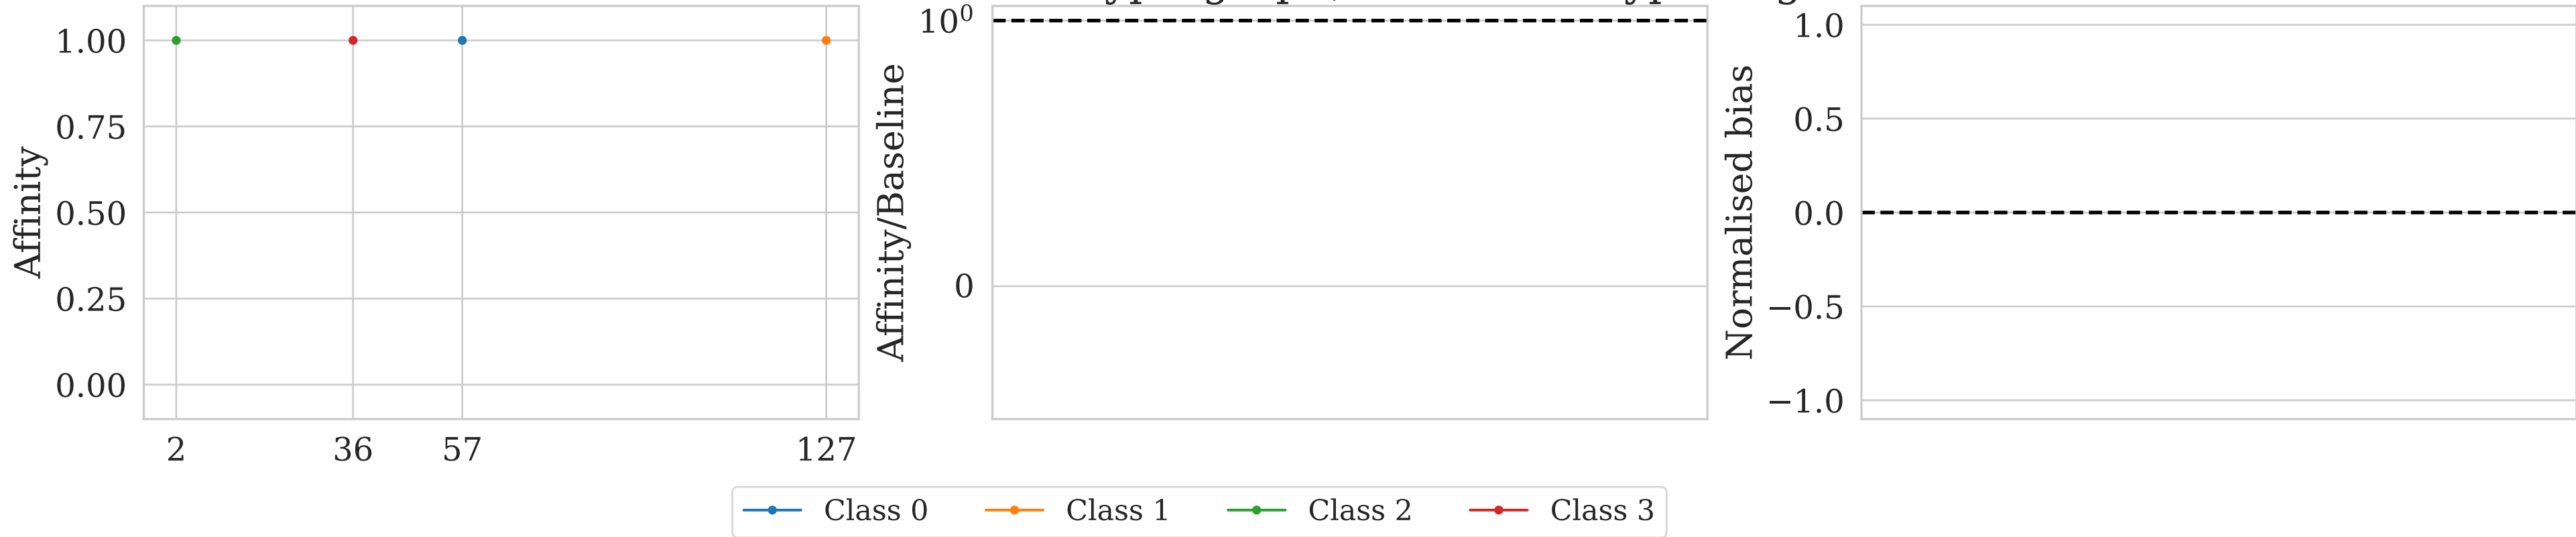

227-uniform hypergraph, number of hyperedges: 1

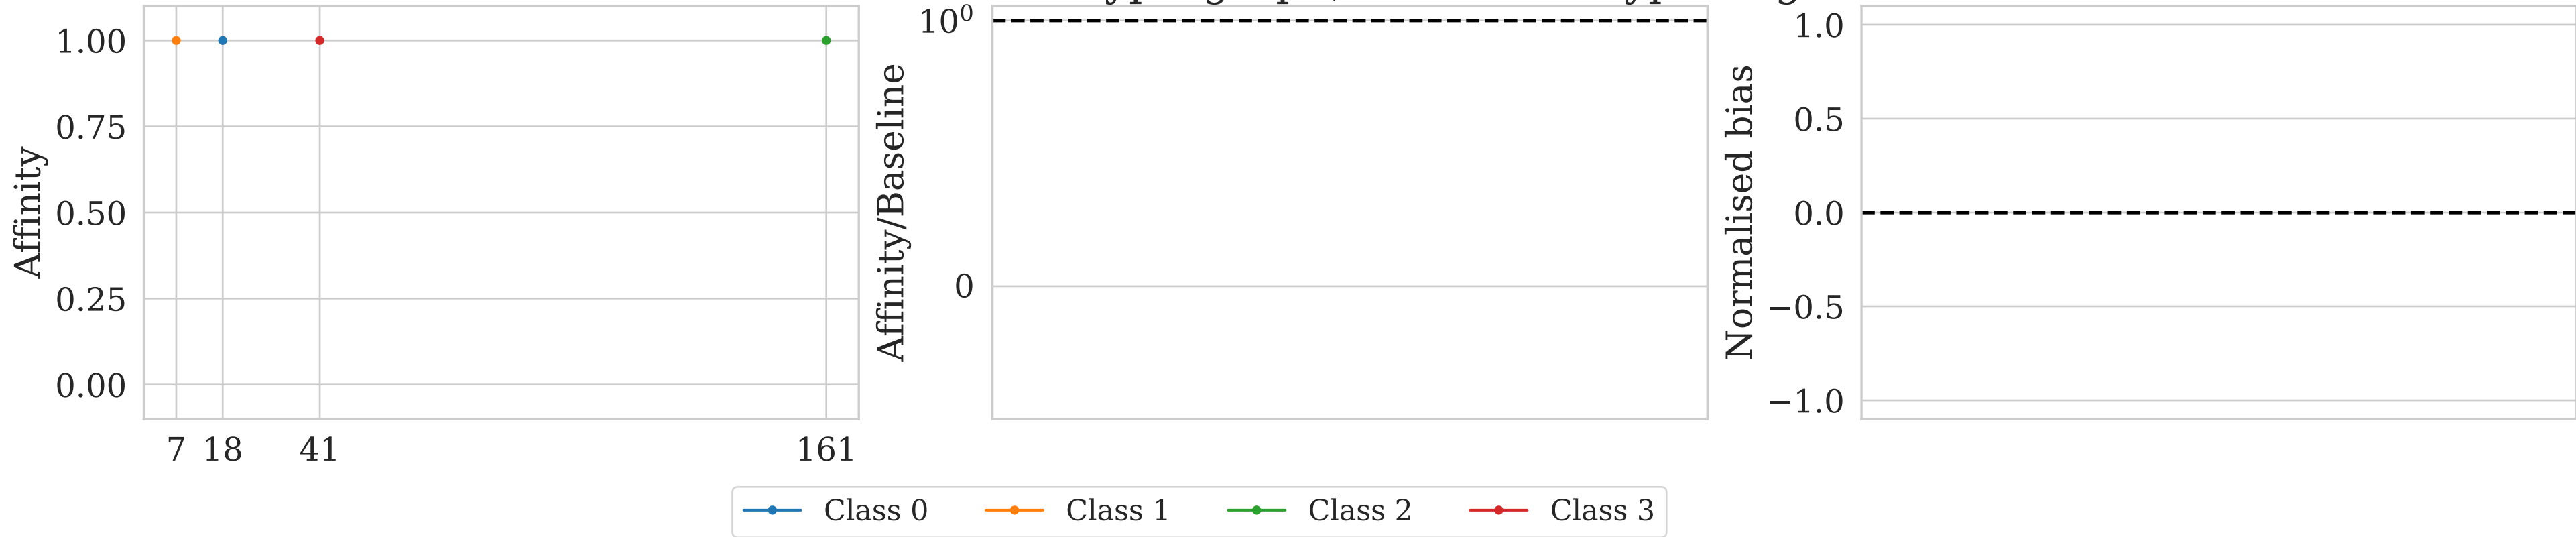

228-uniform hypergraph, number of hyperedges: 1

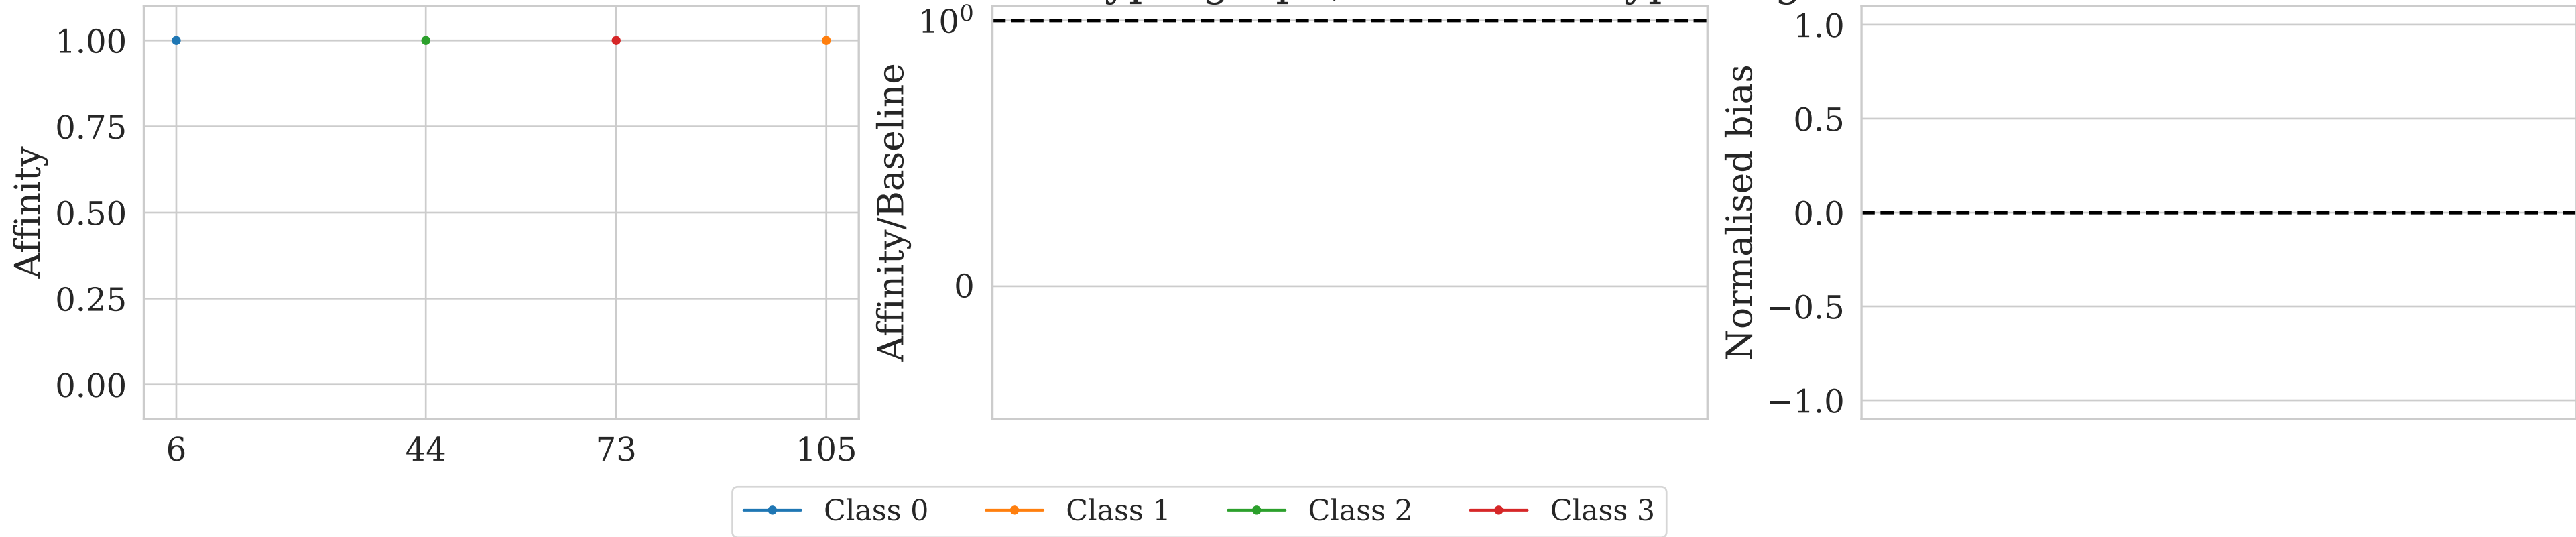

235-uniform hypergraph, number of hyperedges: 1

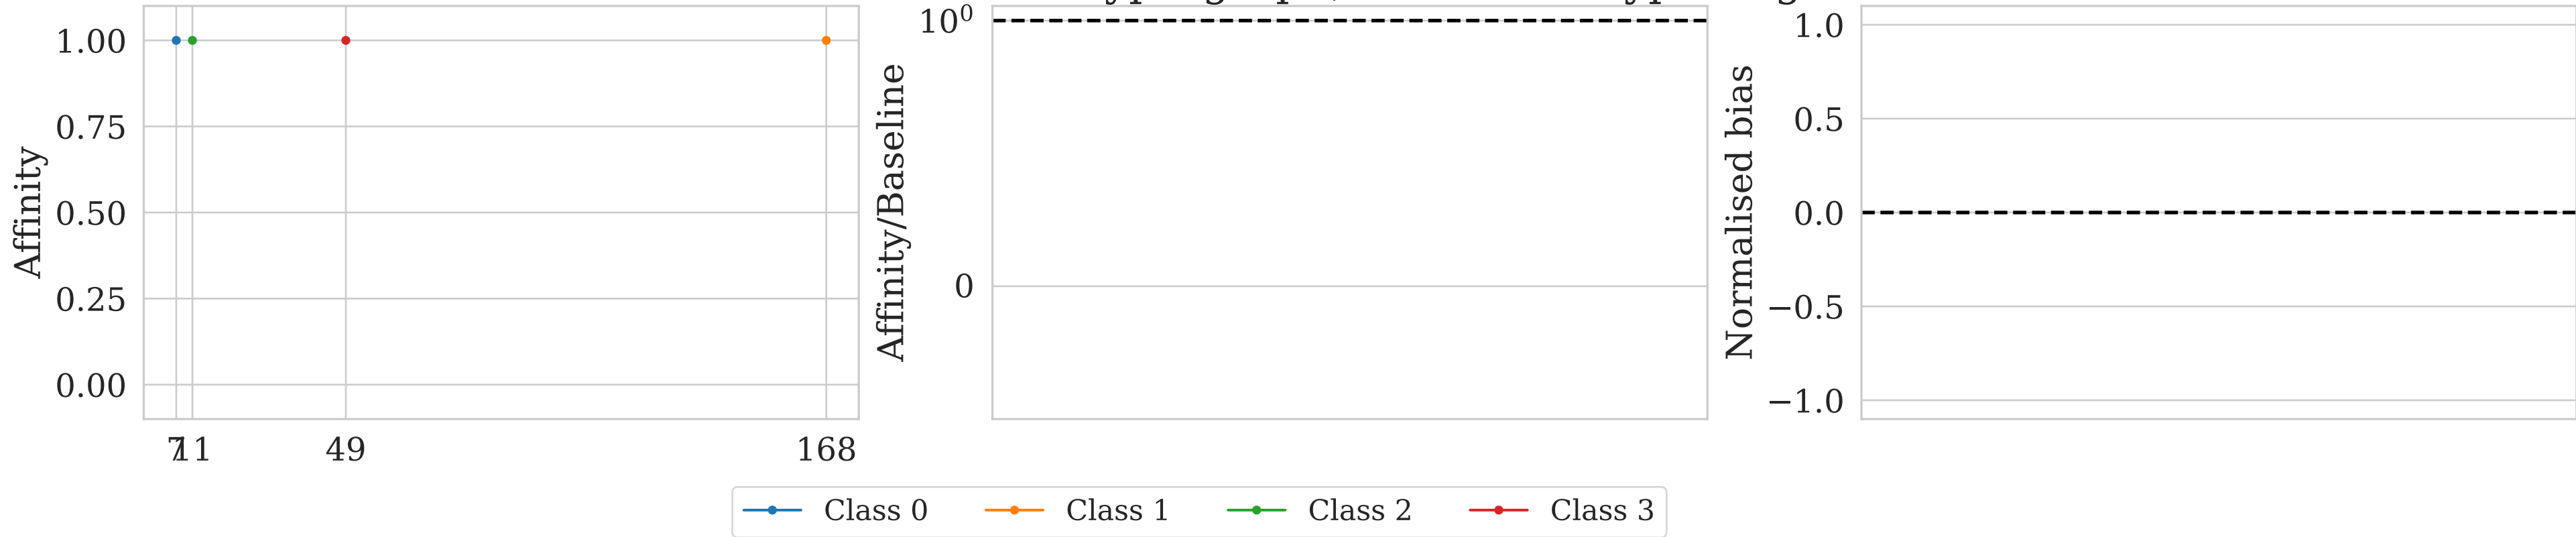



260-uniform hypergraph, number of hyperedges: 1

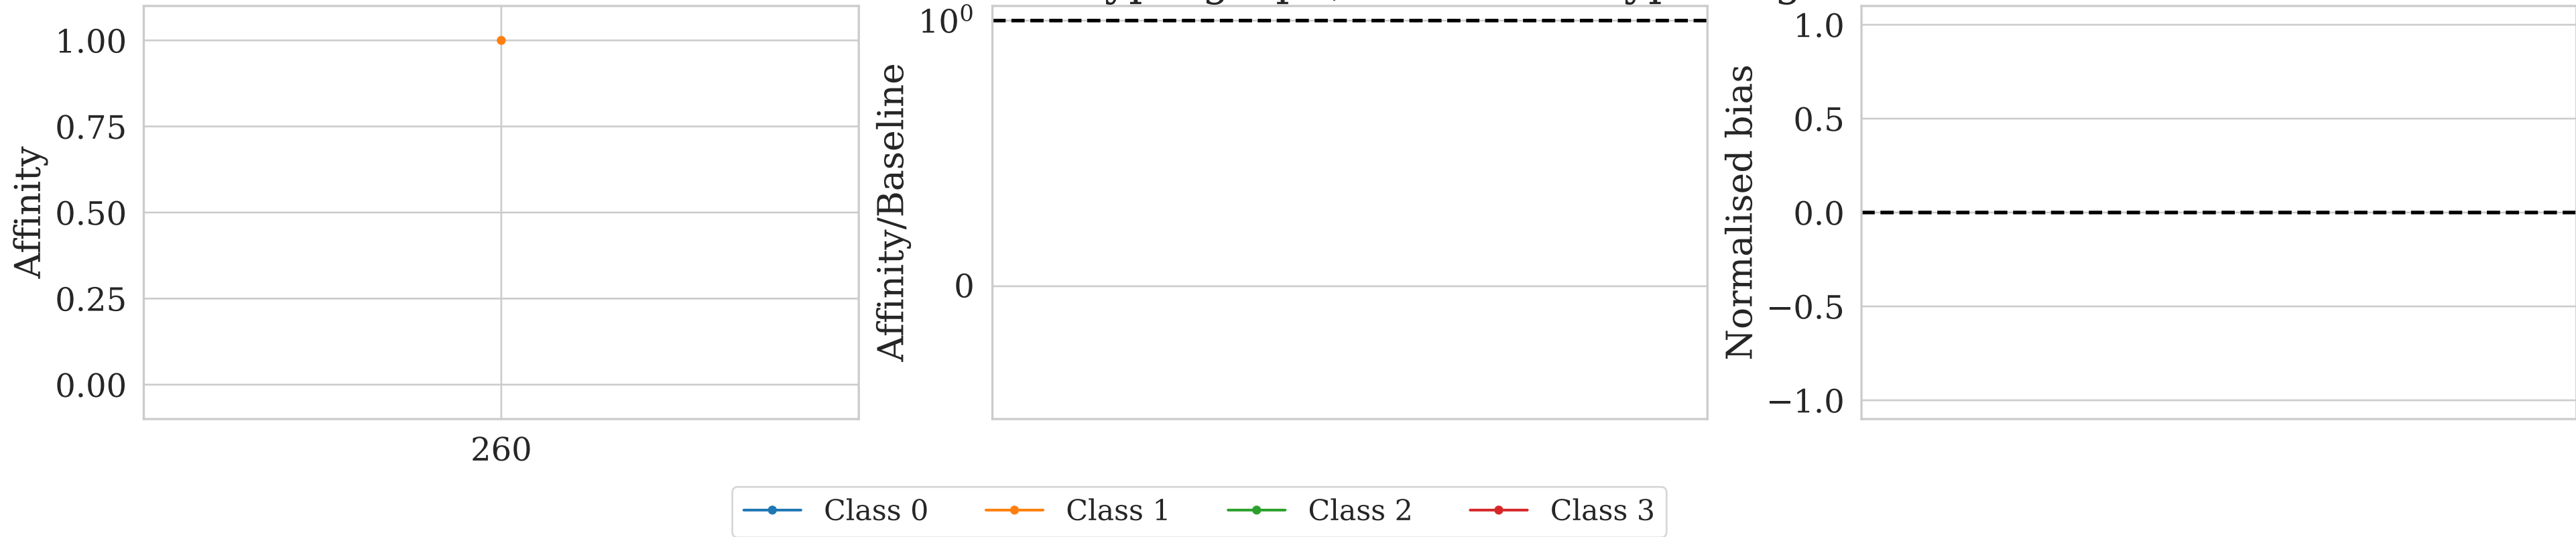

539-uniform hypergraph, number of hyperedges: 1

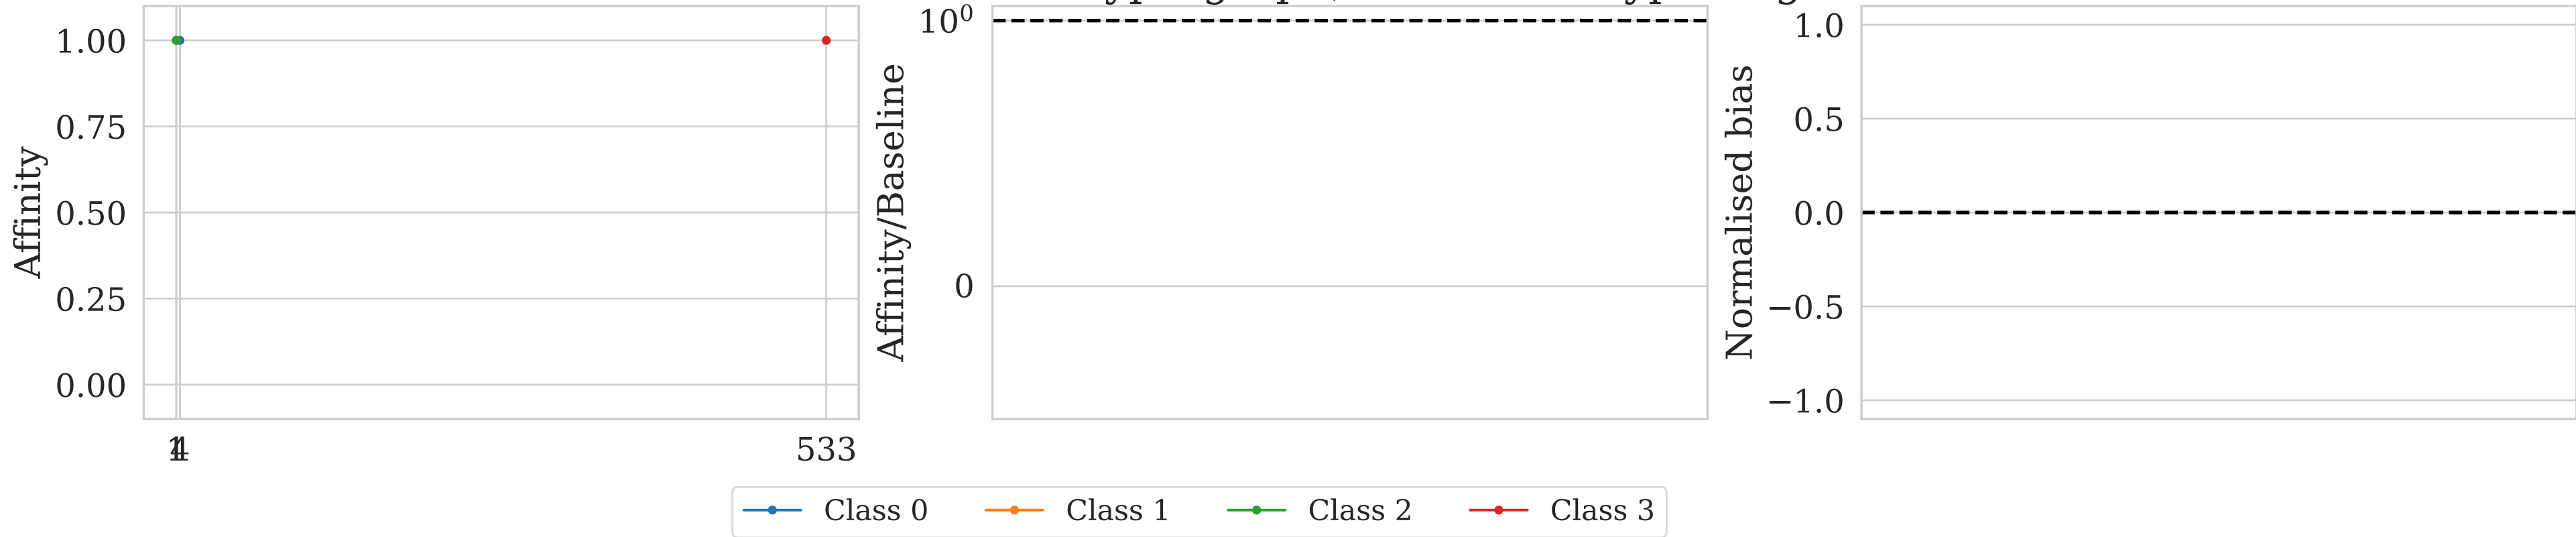

545-uniform hypergraph, number of hyperedges: 1

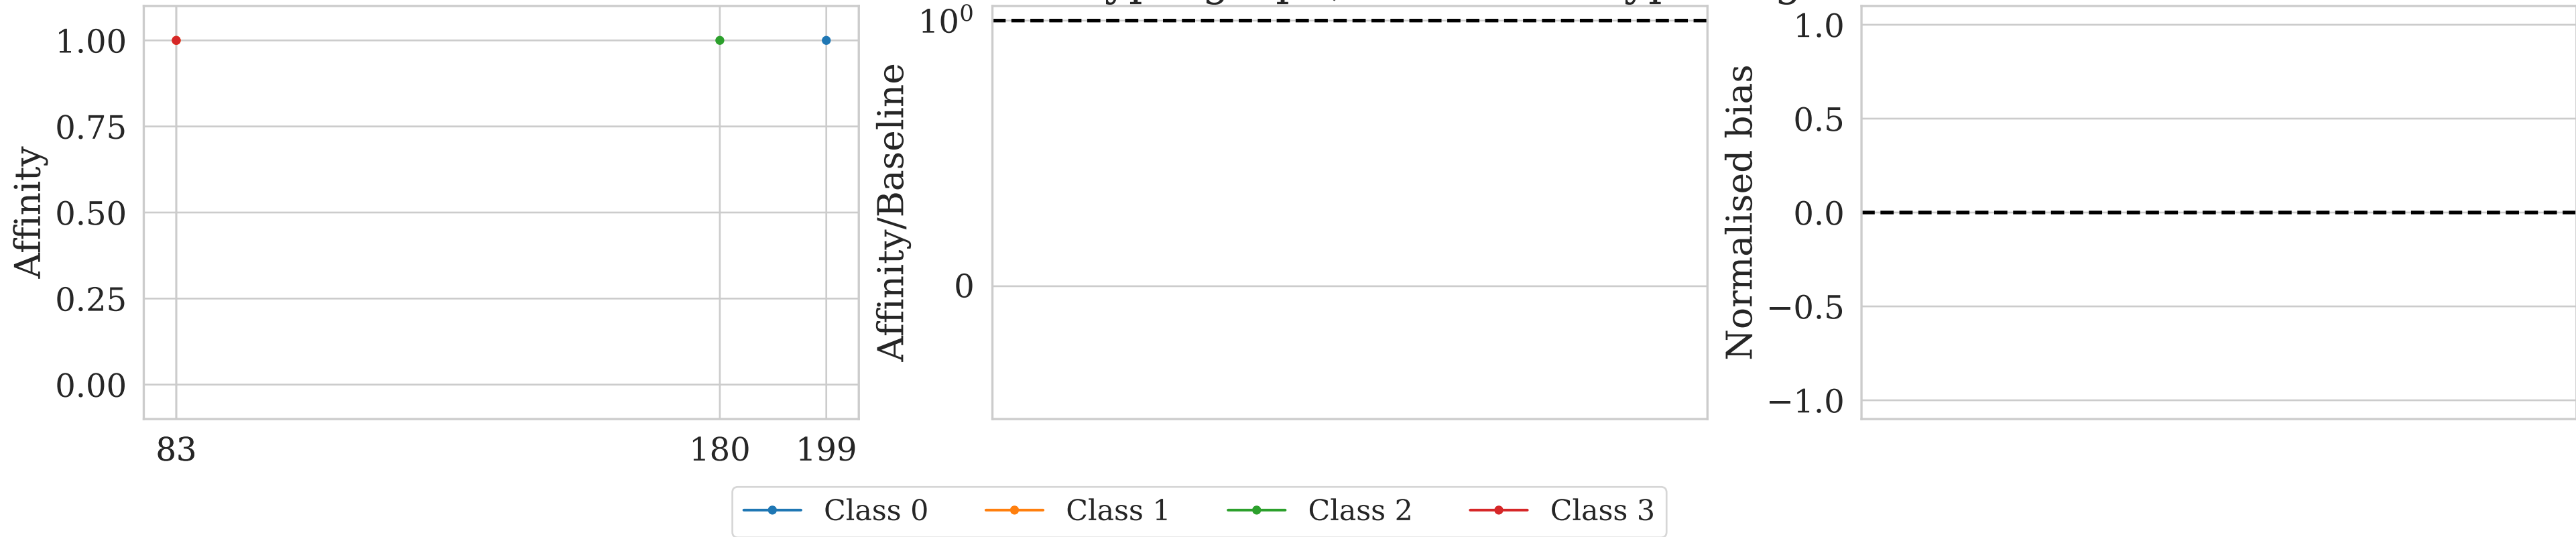

559-uniform hypergraph, number of hyperedges: 1

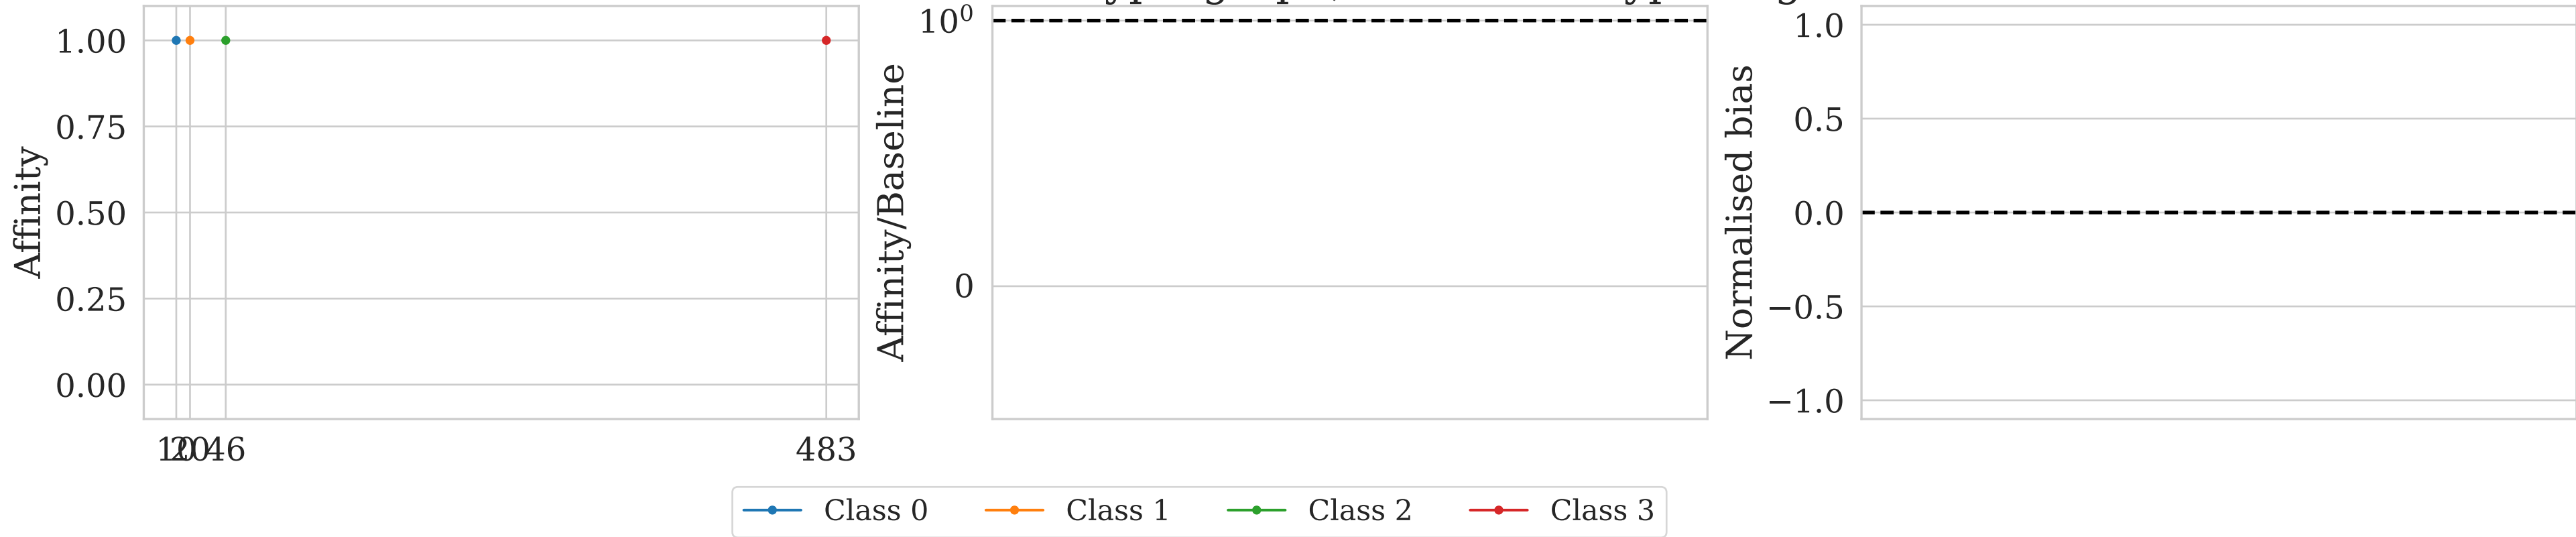

858-uniform hypergraph, number of hyperedges: 1

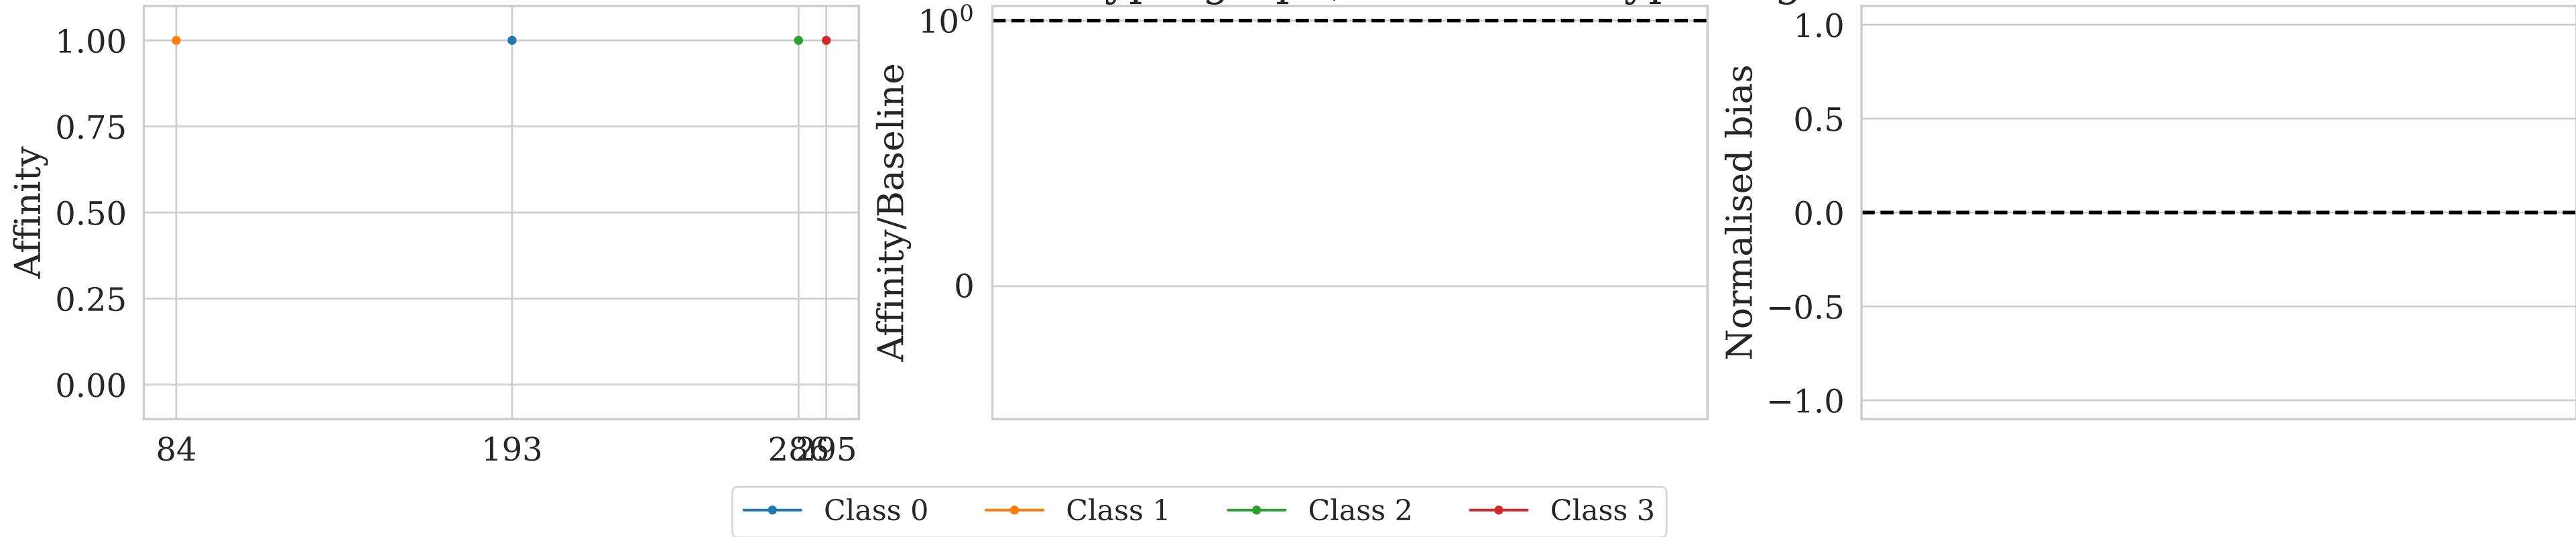

888-uniform hypergraph, number of hyperedges: 1

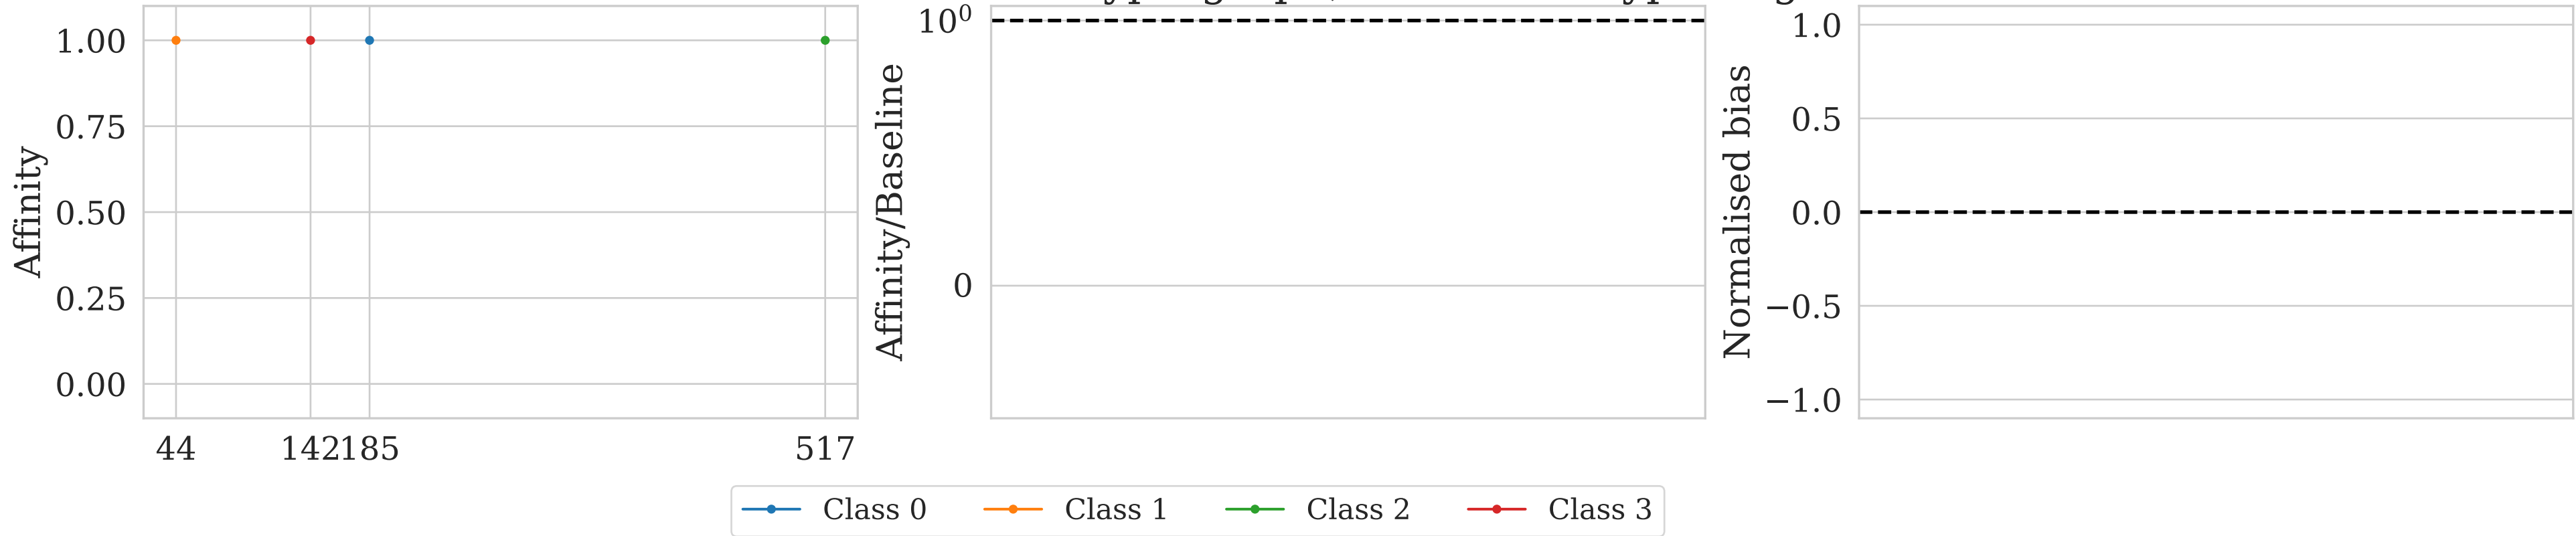

941-uniform hypergraph, number of hyperedges: 1

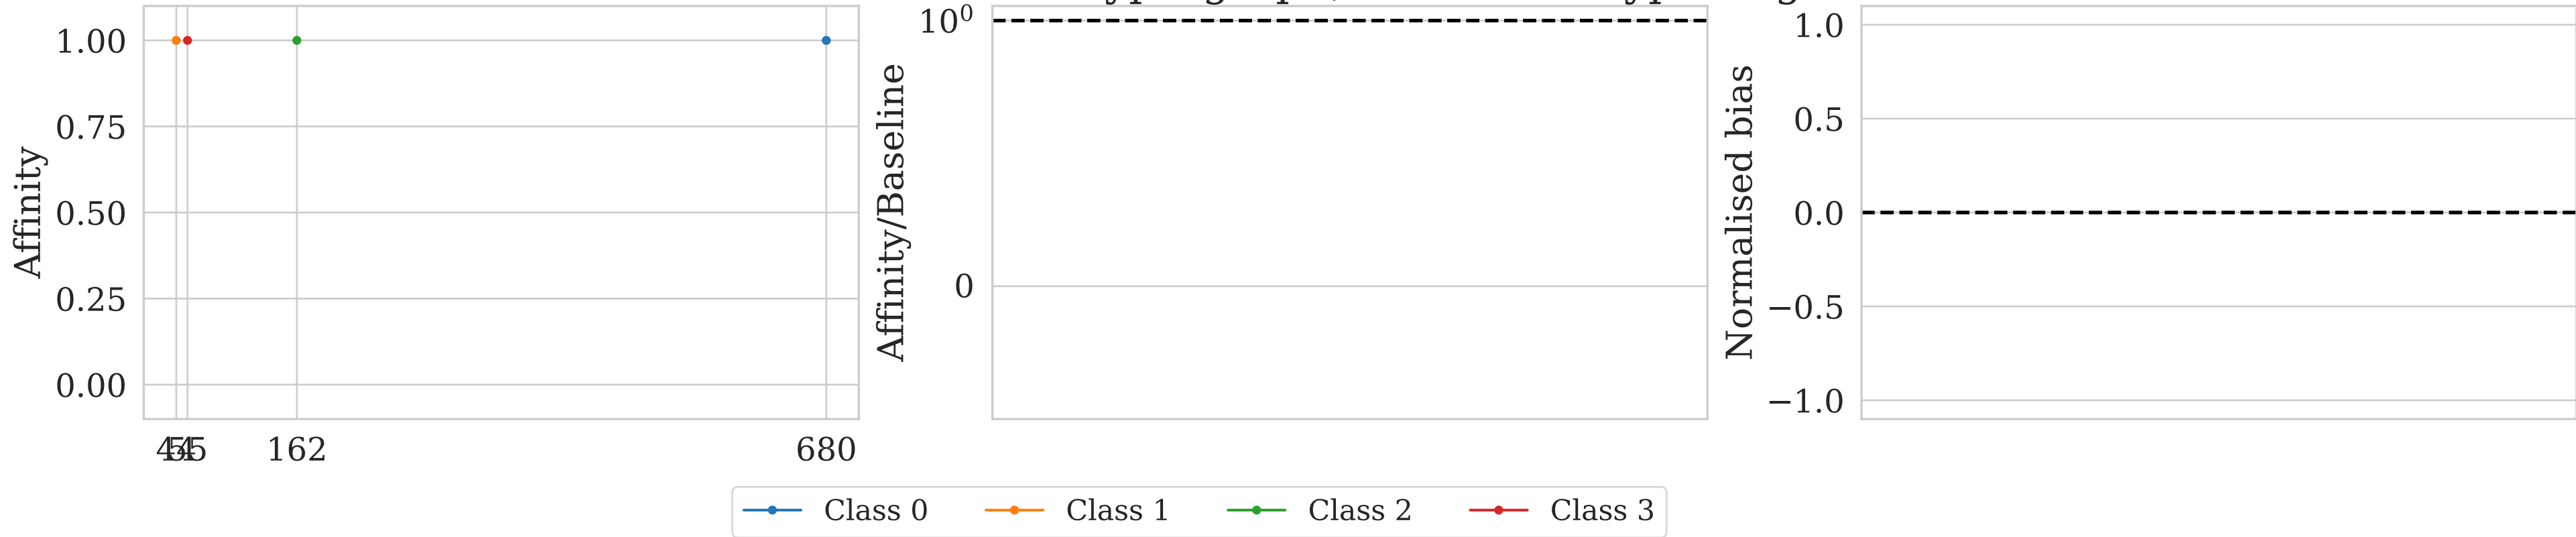

998-uniform hypergraph, number of hyperedges: 1

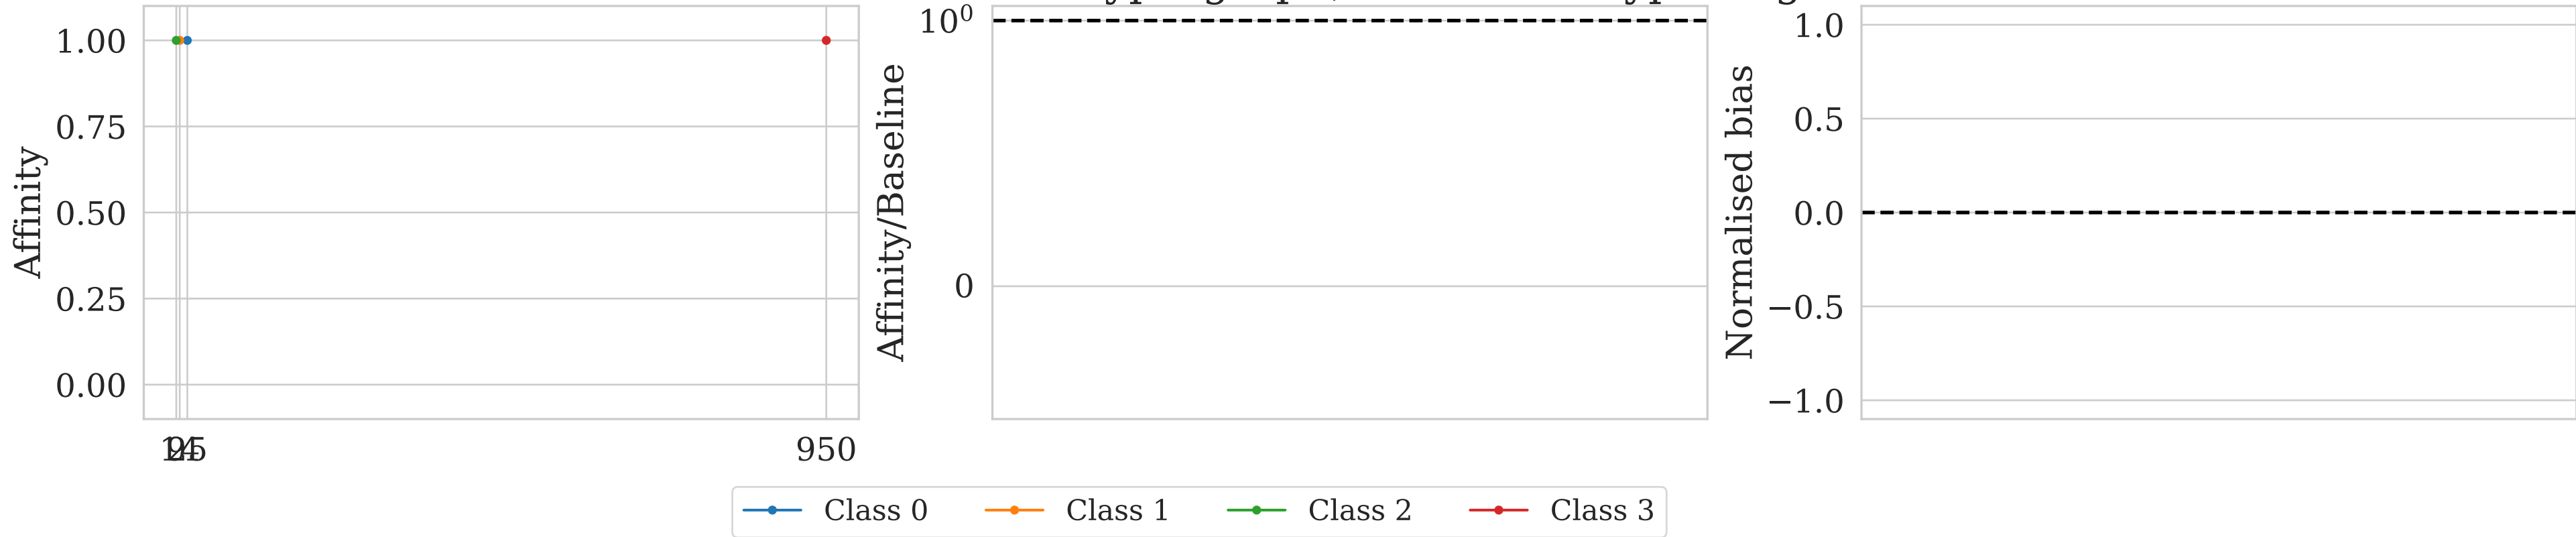



1006-uniform hypergraph, number of hyperedges: 1

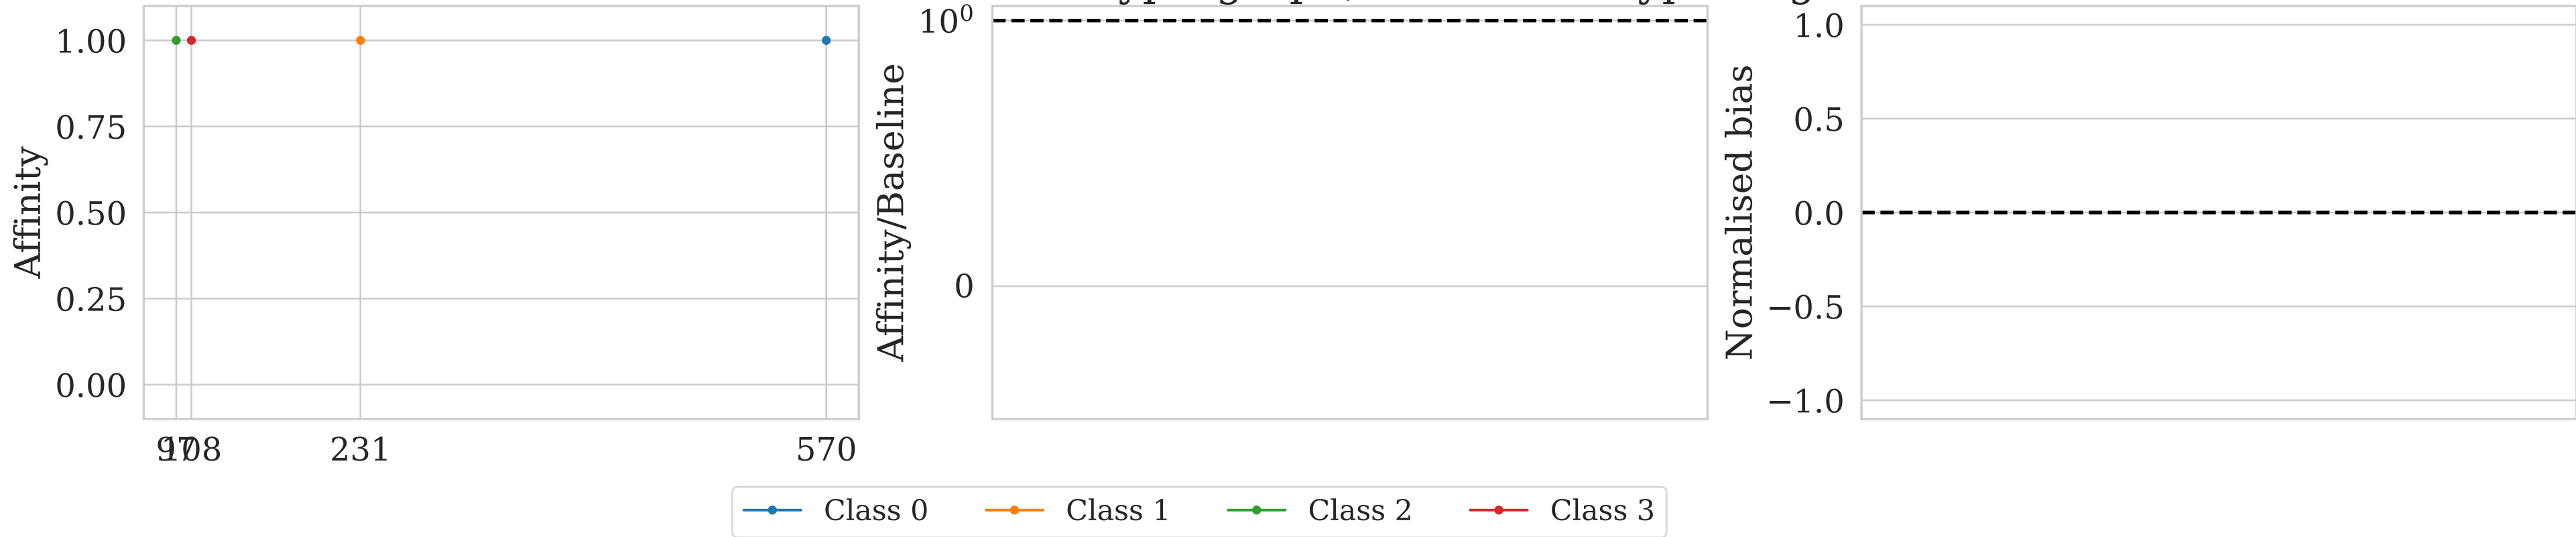

1056-uniform hypergraph, number of hyperedges: 1

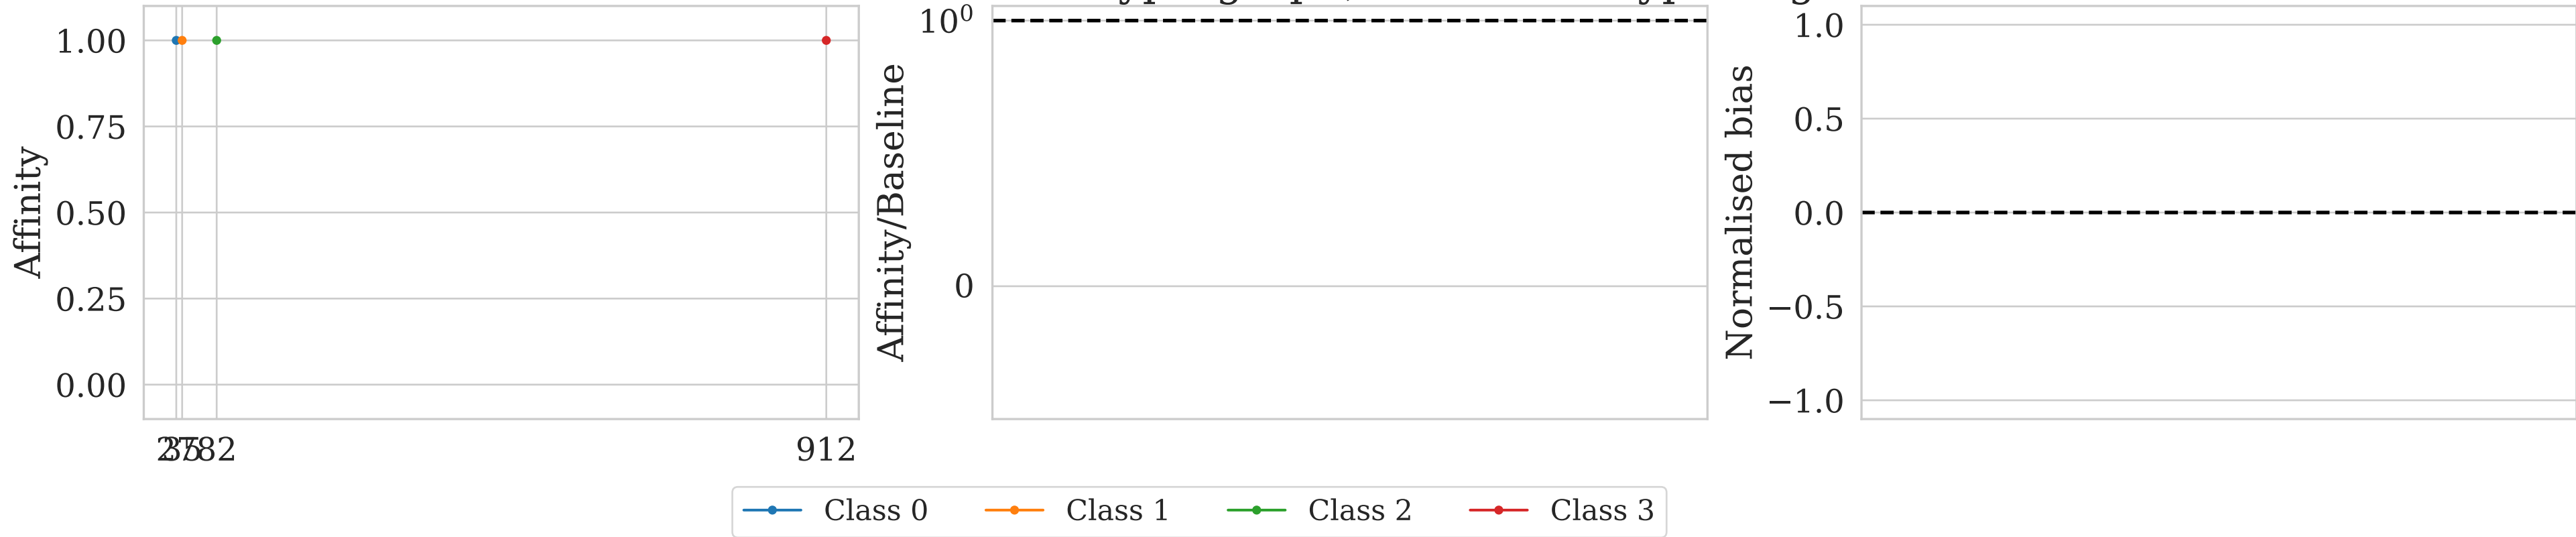

1081-uniform hypergraph, number of hyperedges: 1

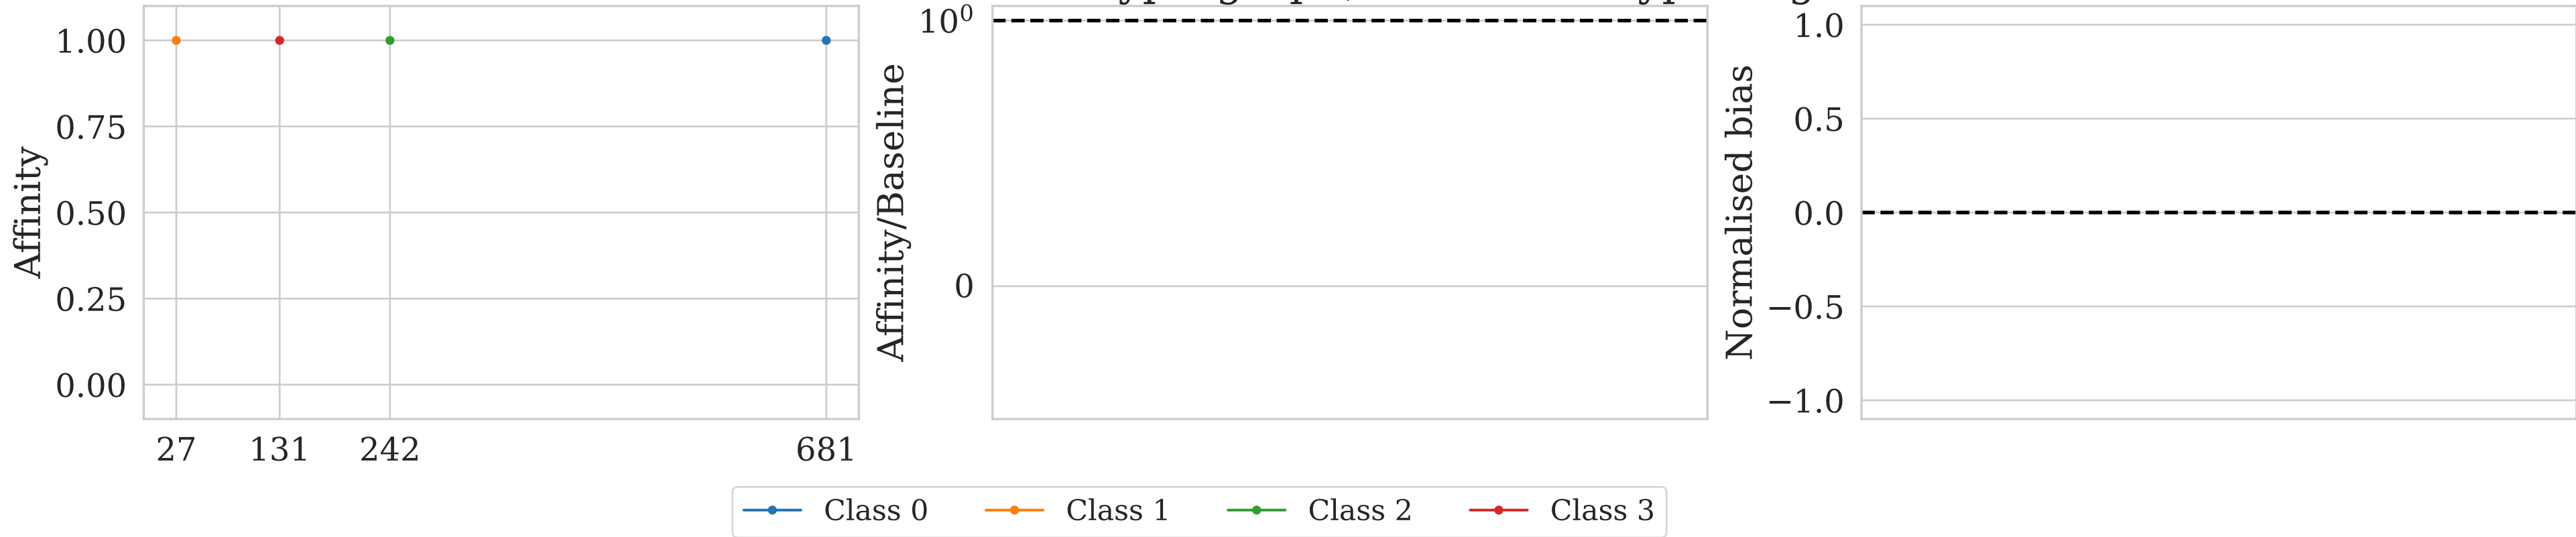

1113-uniform hypergraph, number of hyperedges: 1

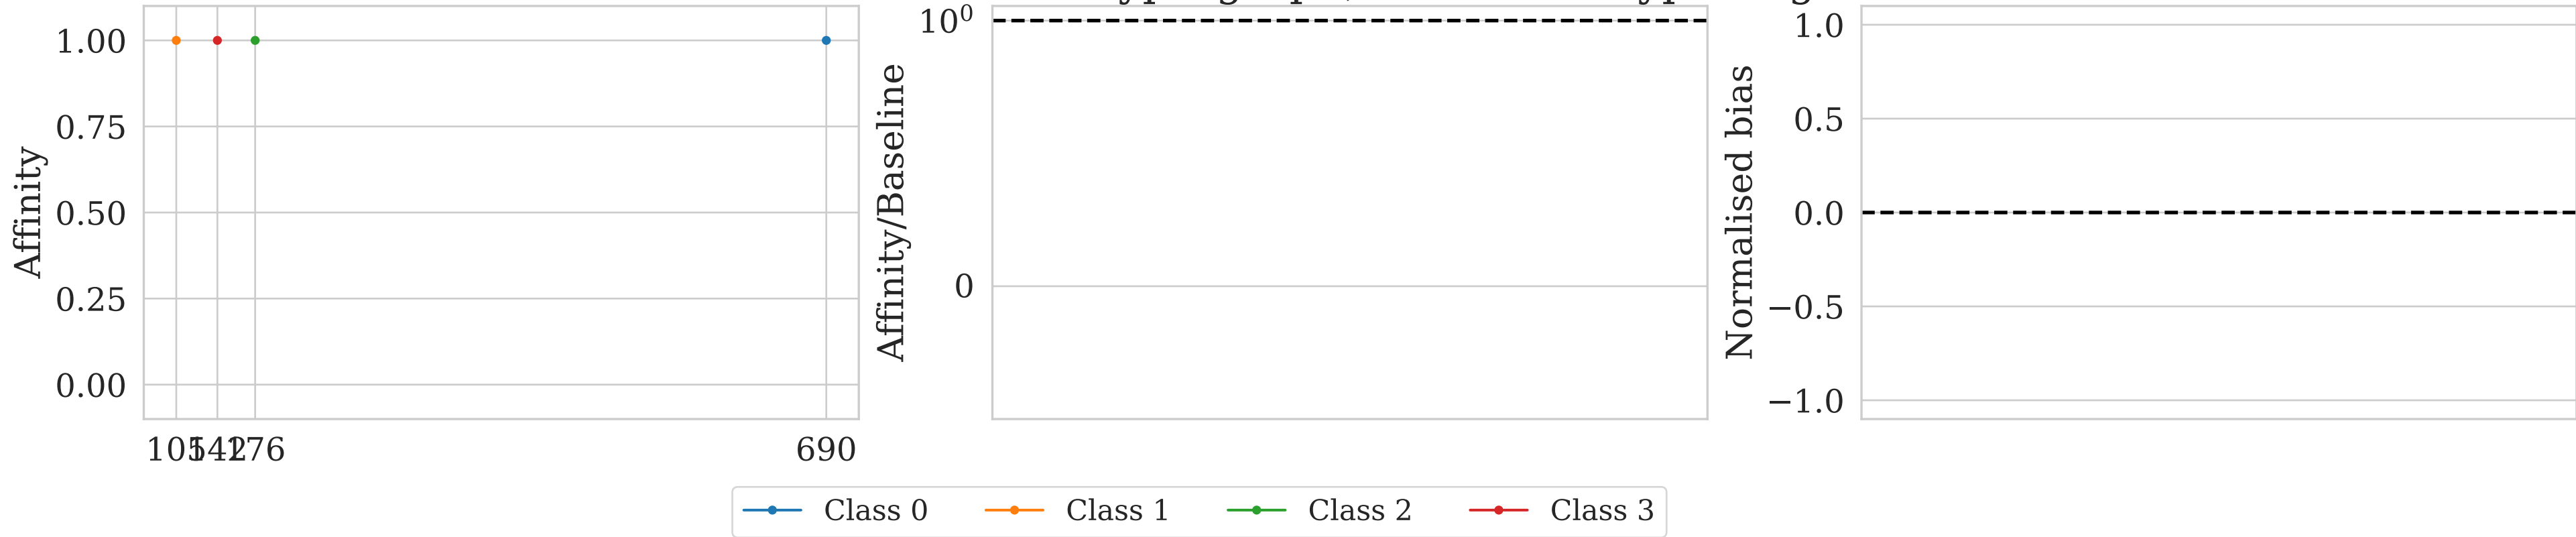

1194-uniform hypergraph, number of hyperedges: 1

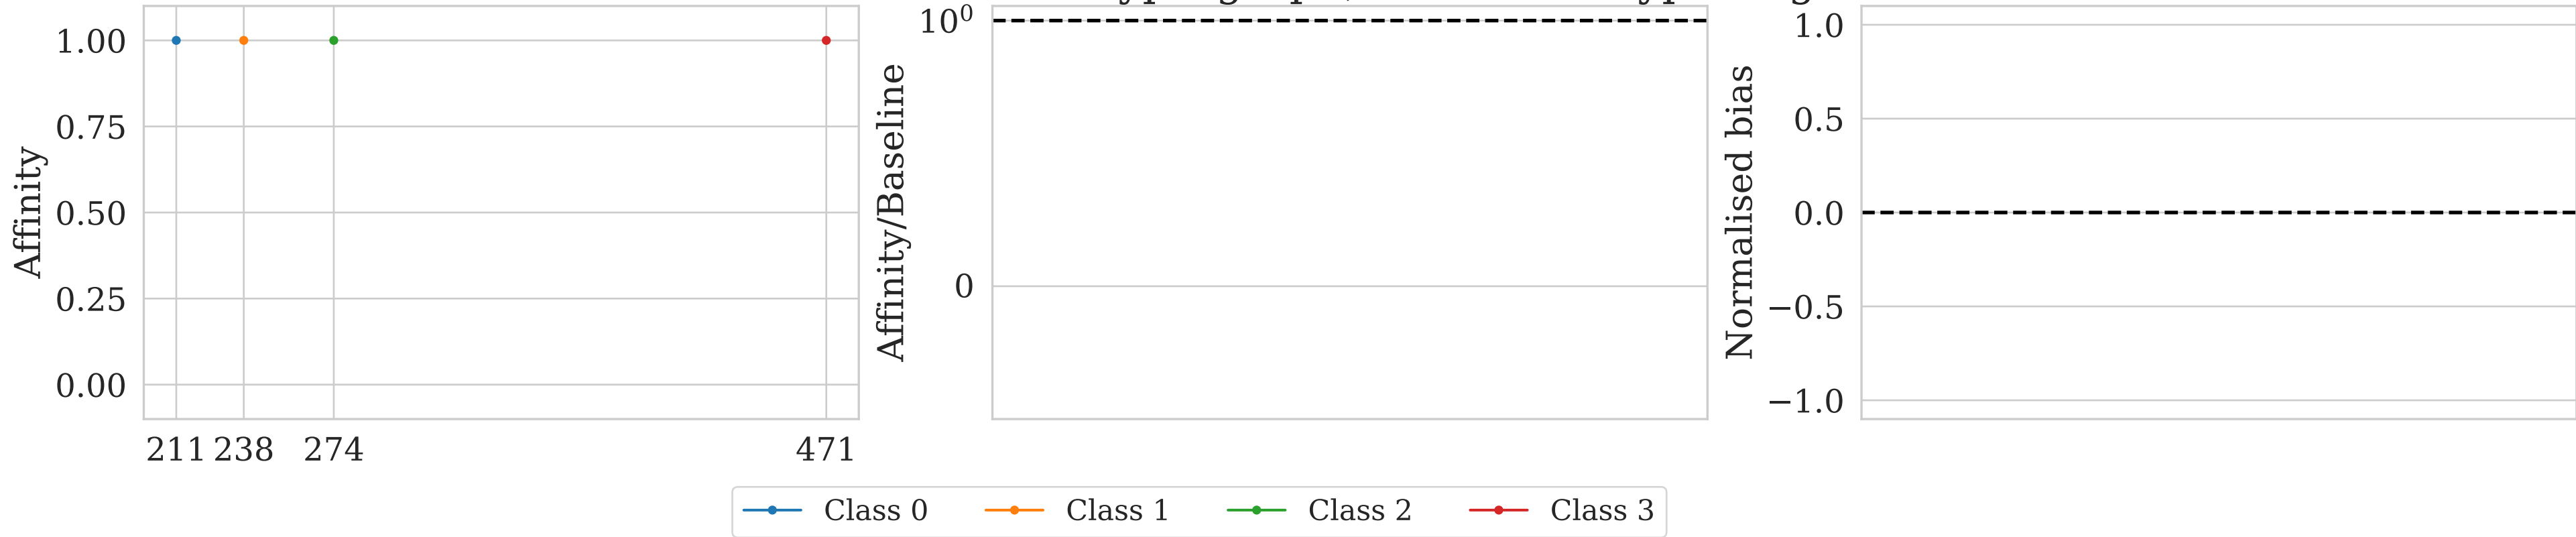

1202-uniform hypergraph, number of hyperedges: 1

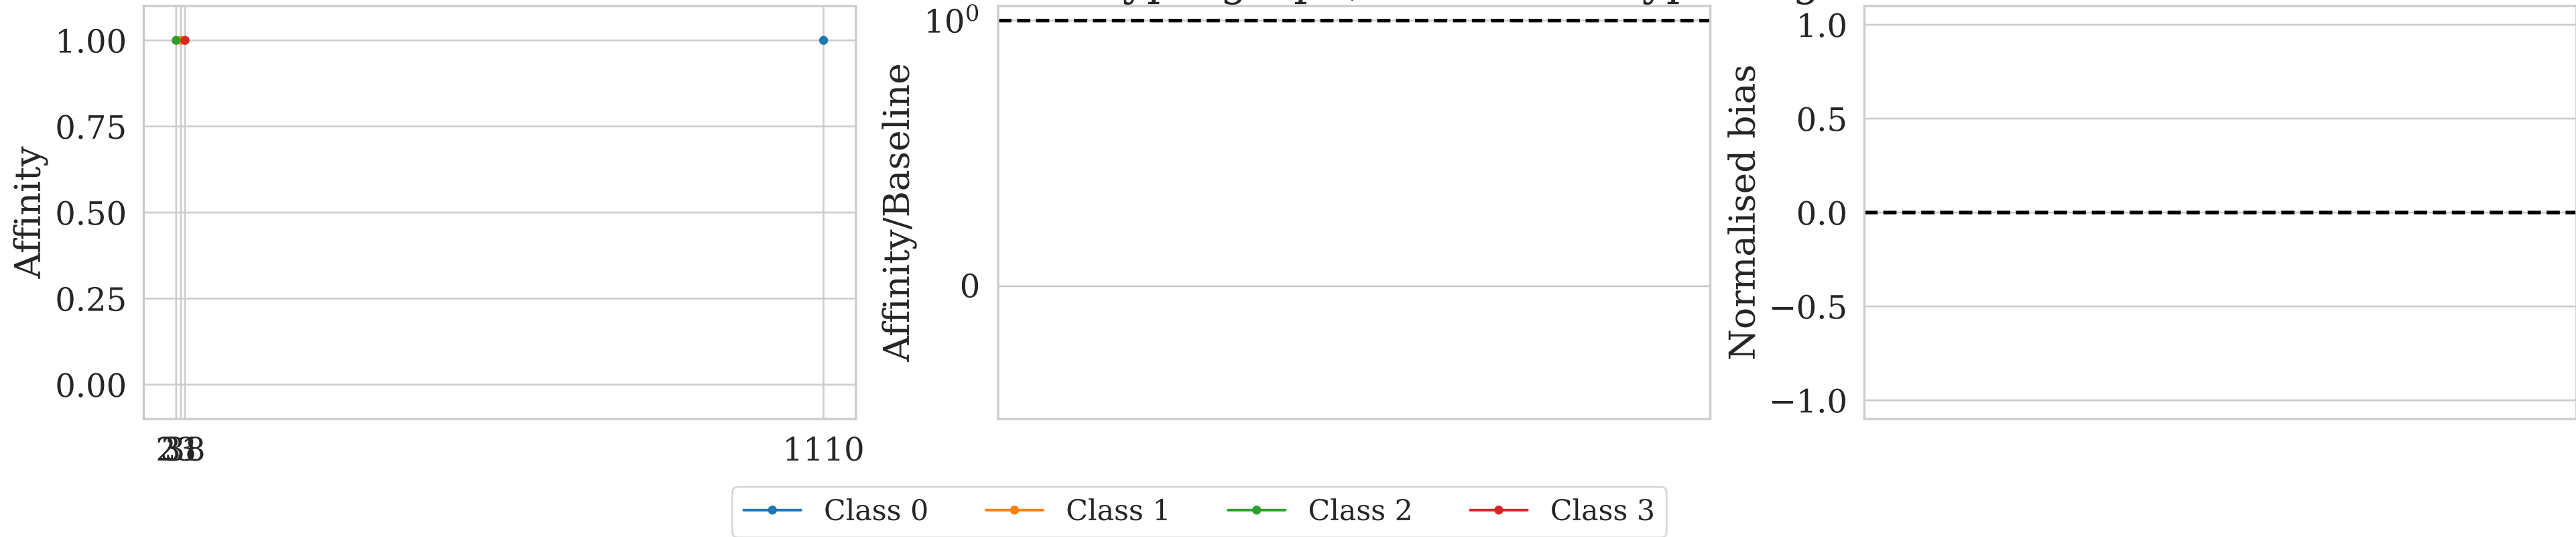

1269-uniform hypergraph, number of hyperedges: 1

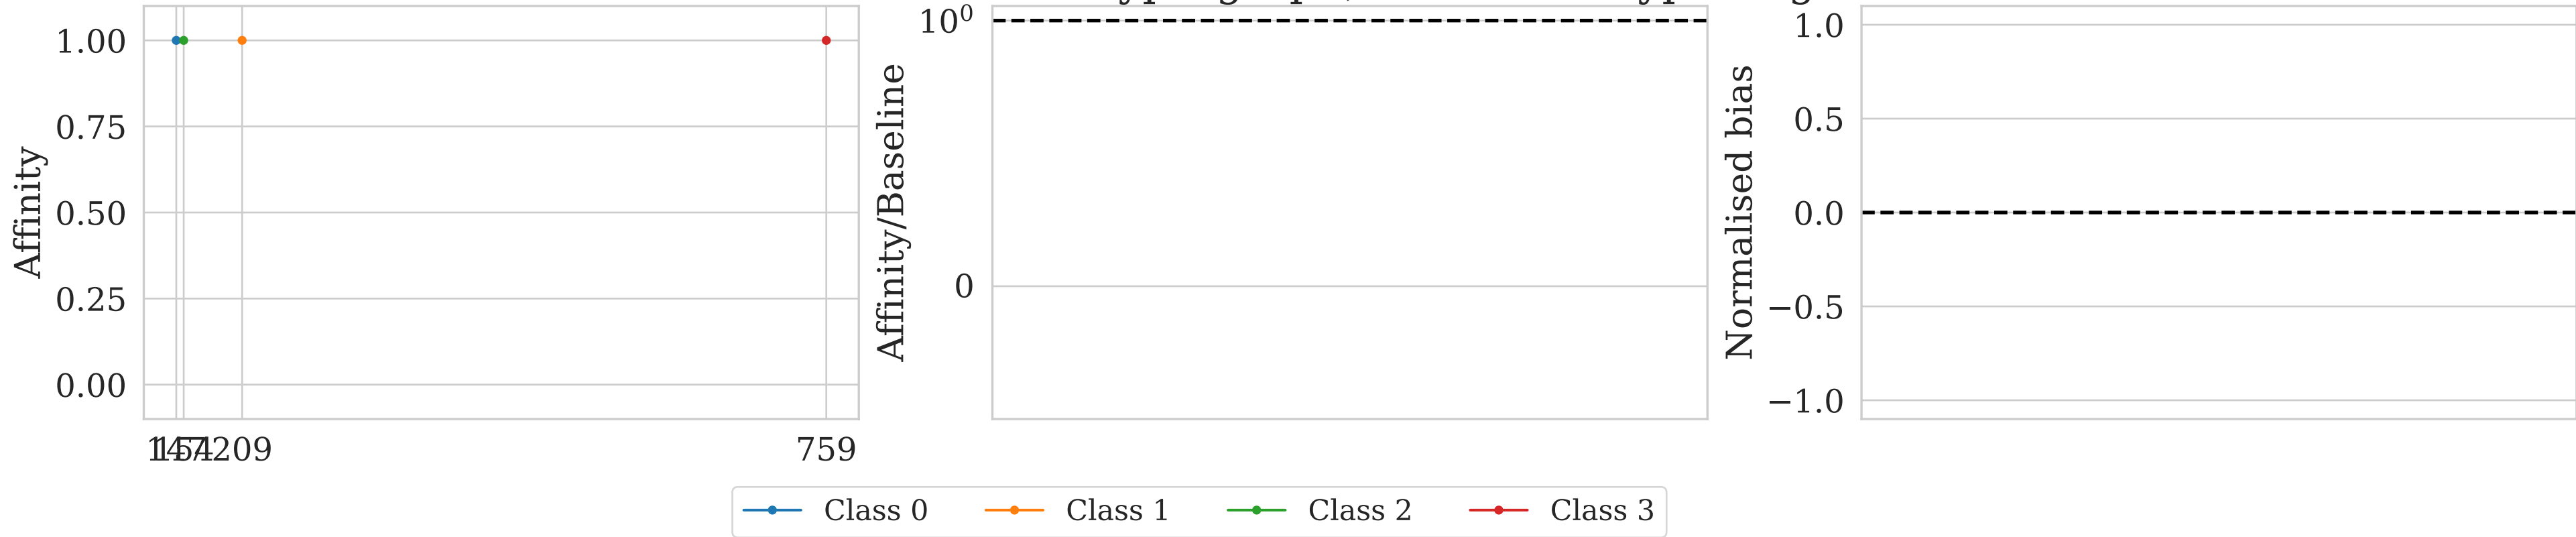

1309-uniform hypergraph, number of hyperedges: 1

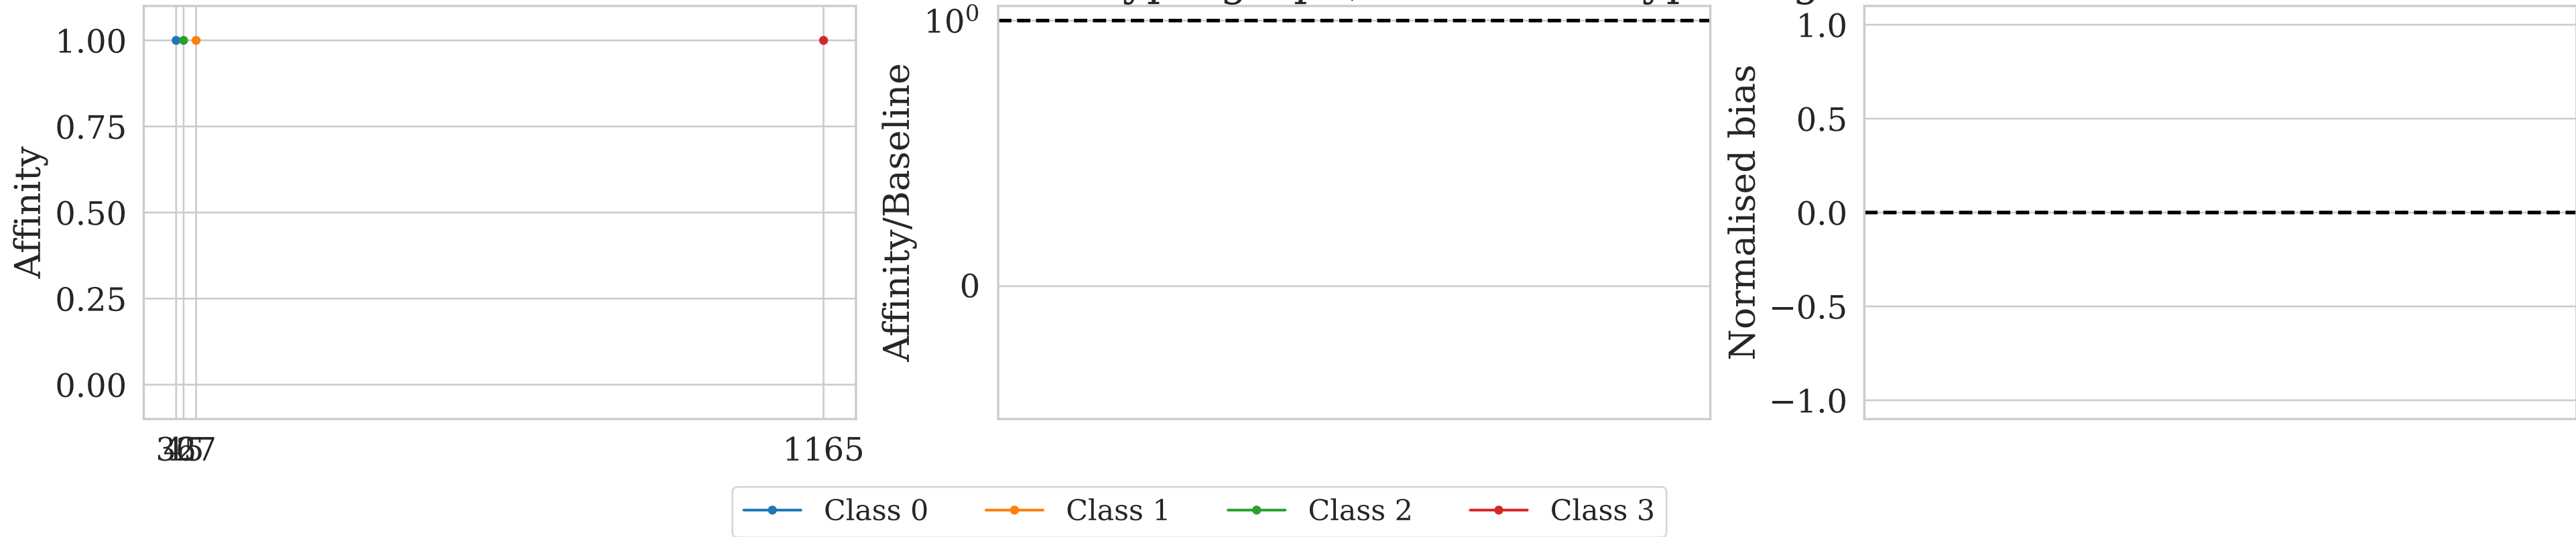



1389-uniform hypergraph, number of hyperedges: 1

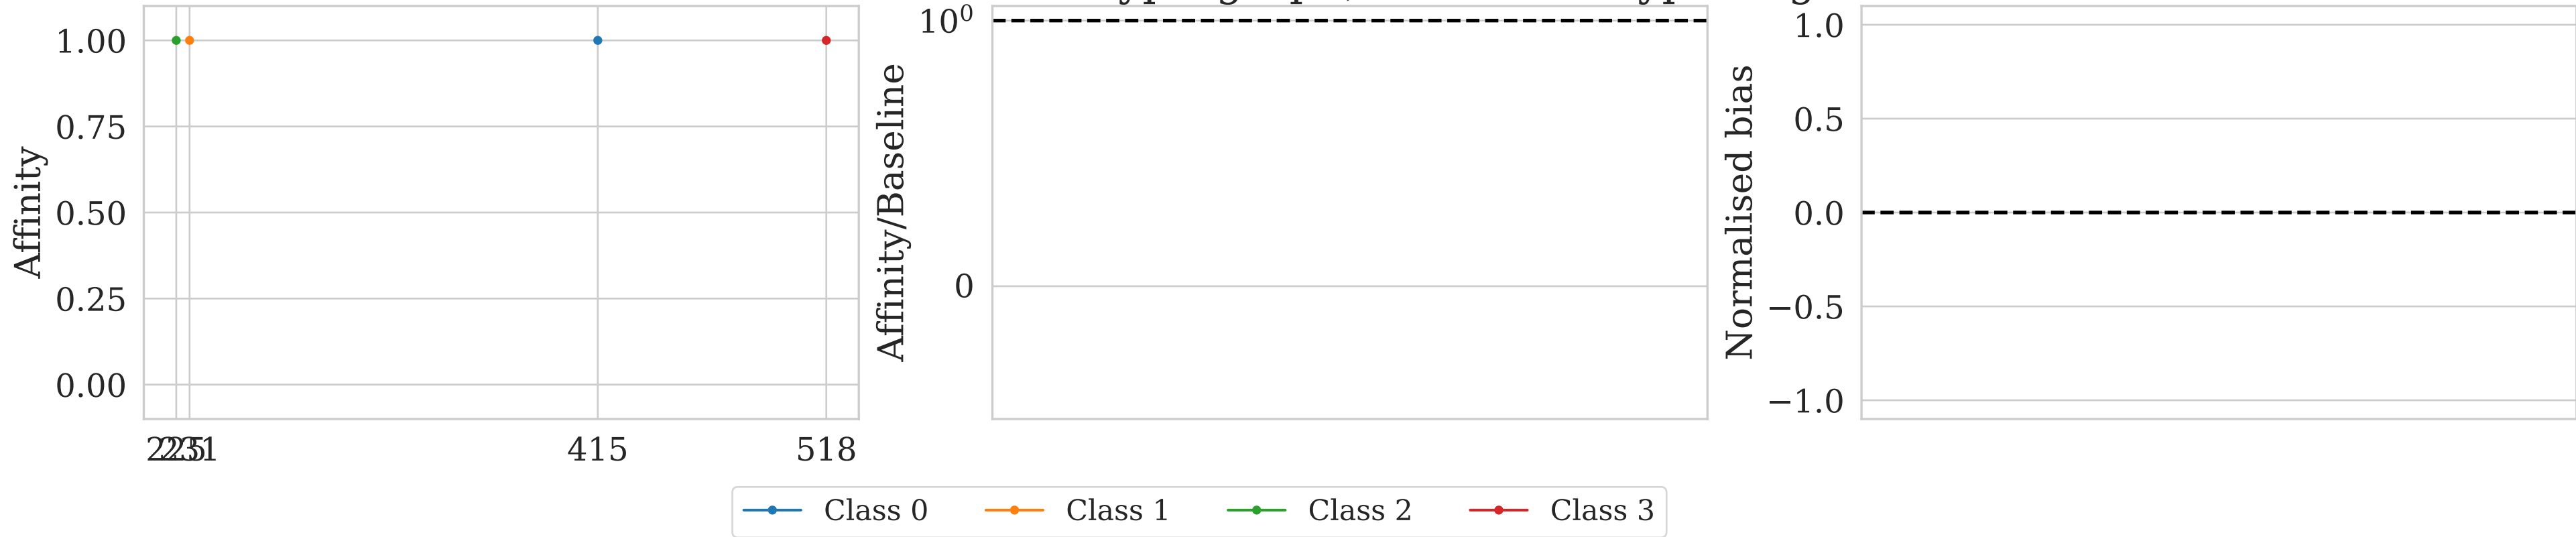

1524-uniform hypergraph, number of hyperedges: 1

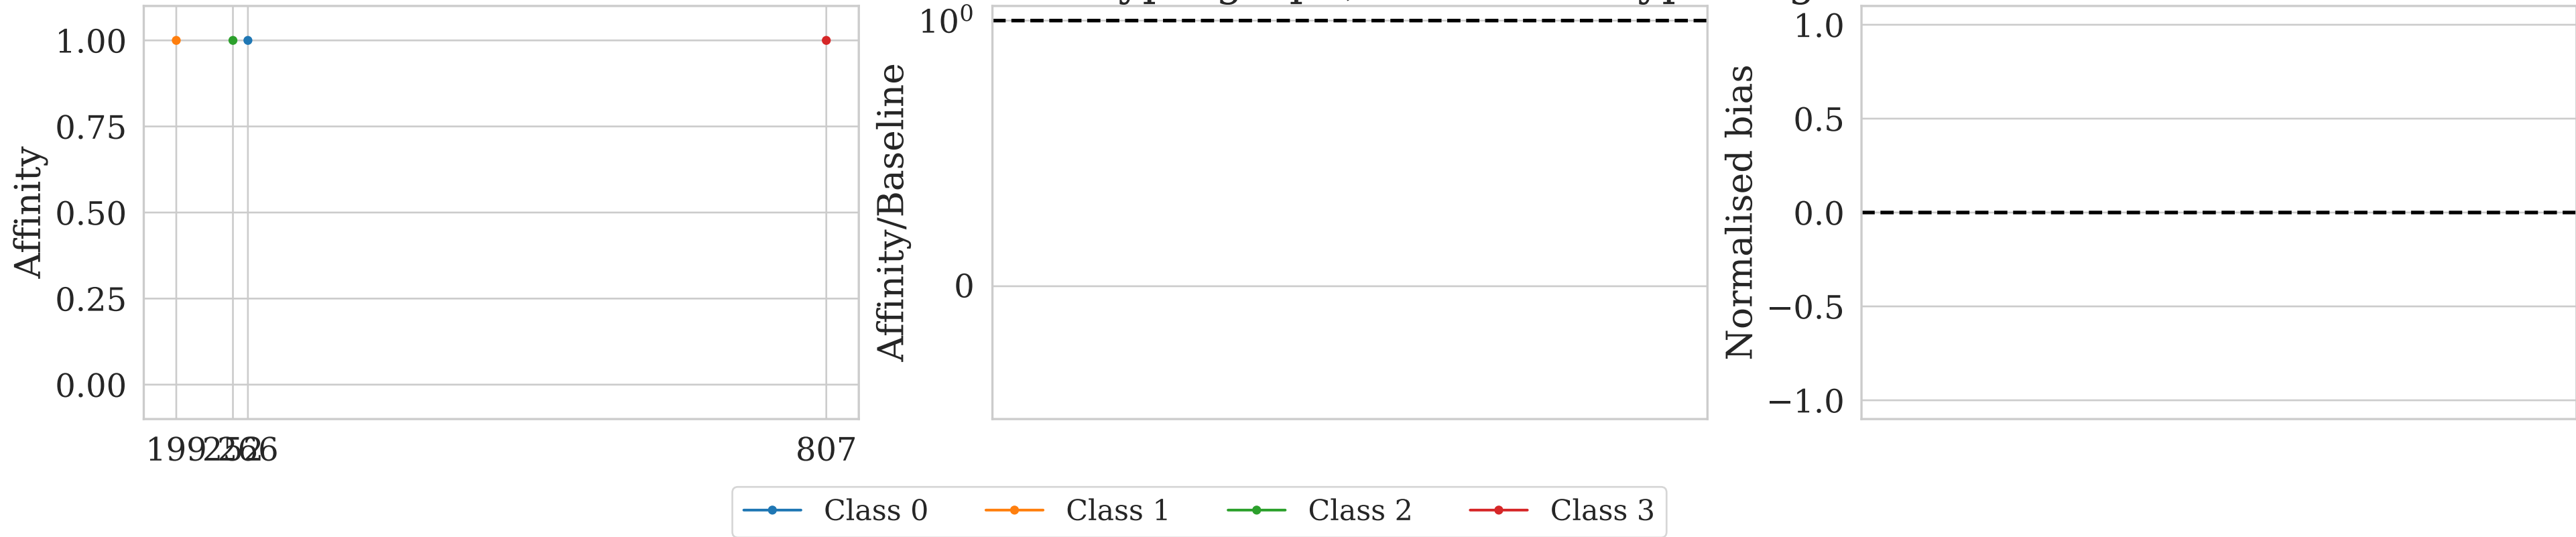

1552-uniform hypergraph, number of hyperedges: 1

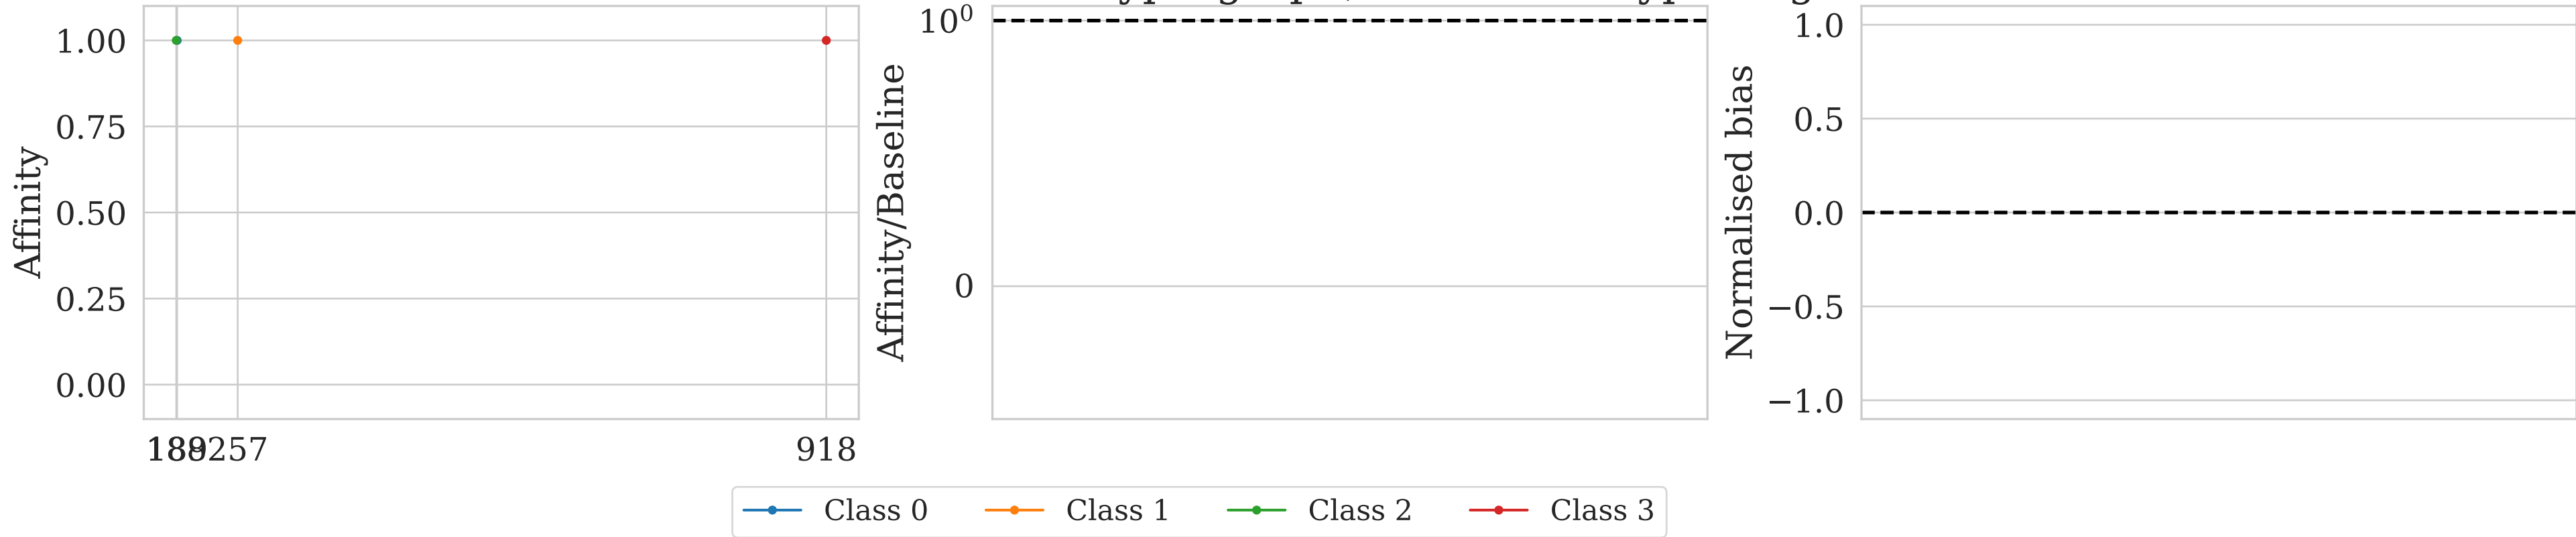

1581-uniform hypergraph, number of hyperedges: 1

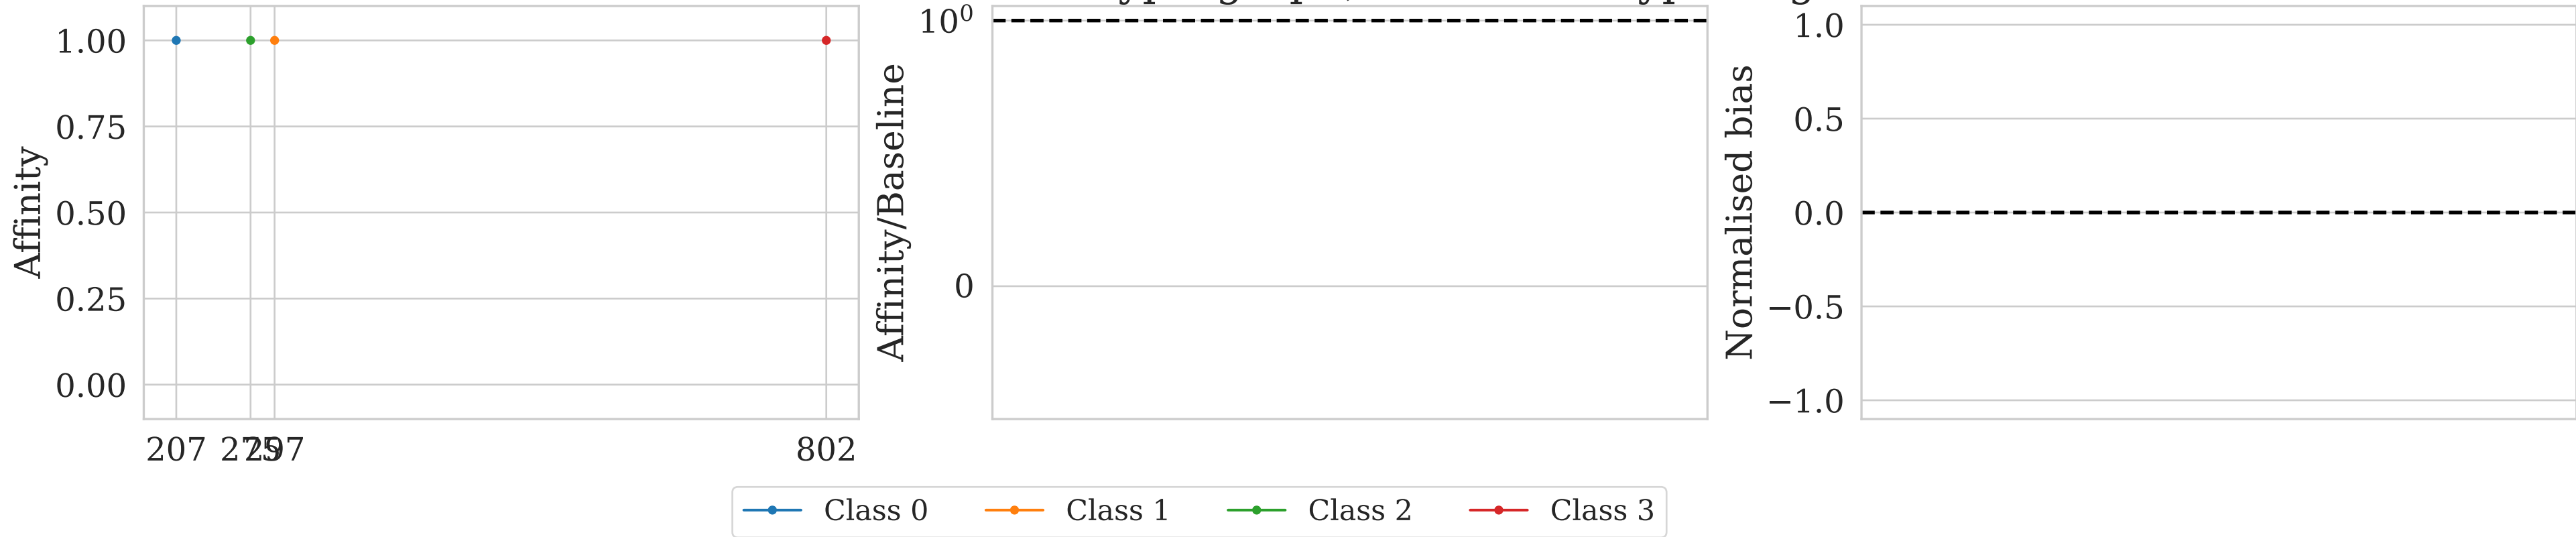

1713-uniform hypergraph, number of hyperedges: 1

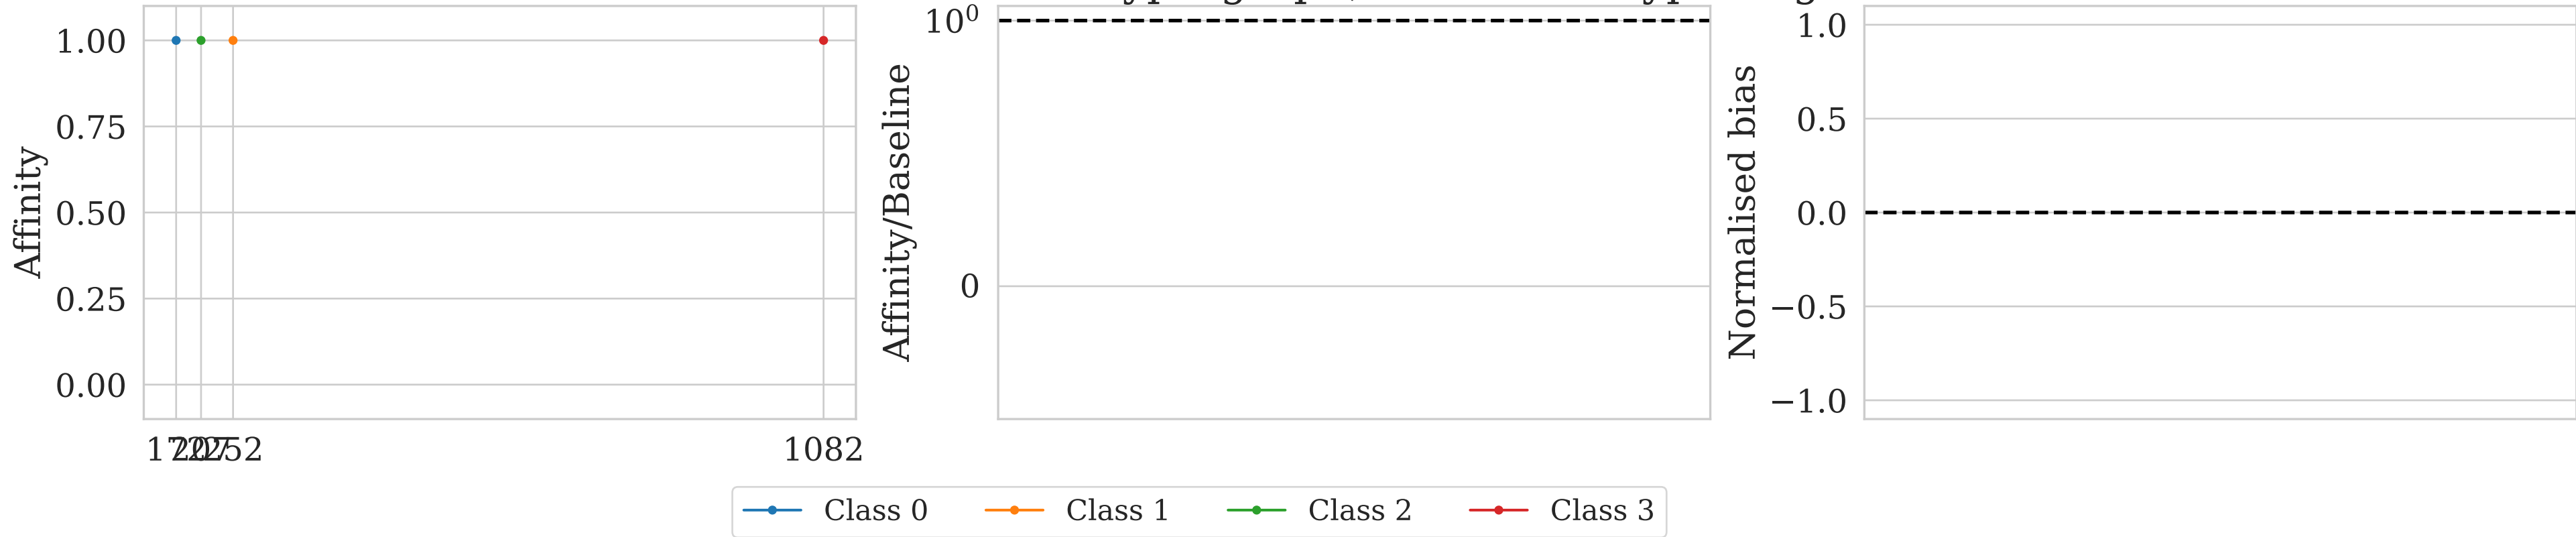

1748-uniform hypergraph, number of hyperedges: 1

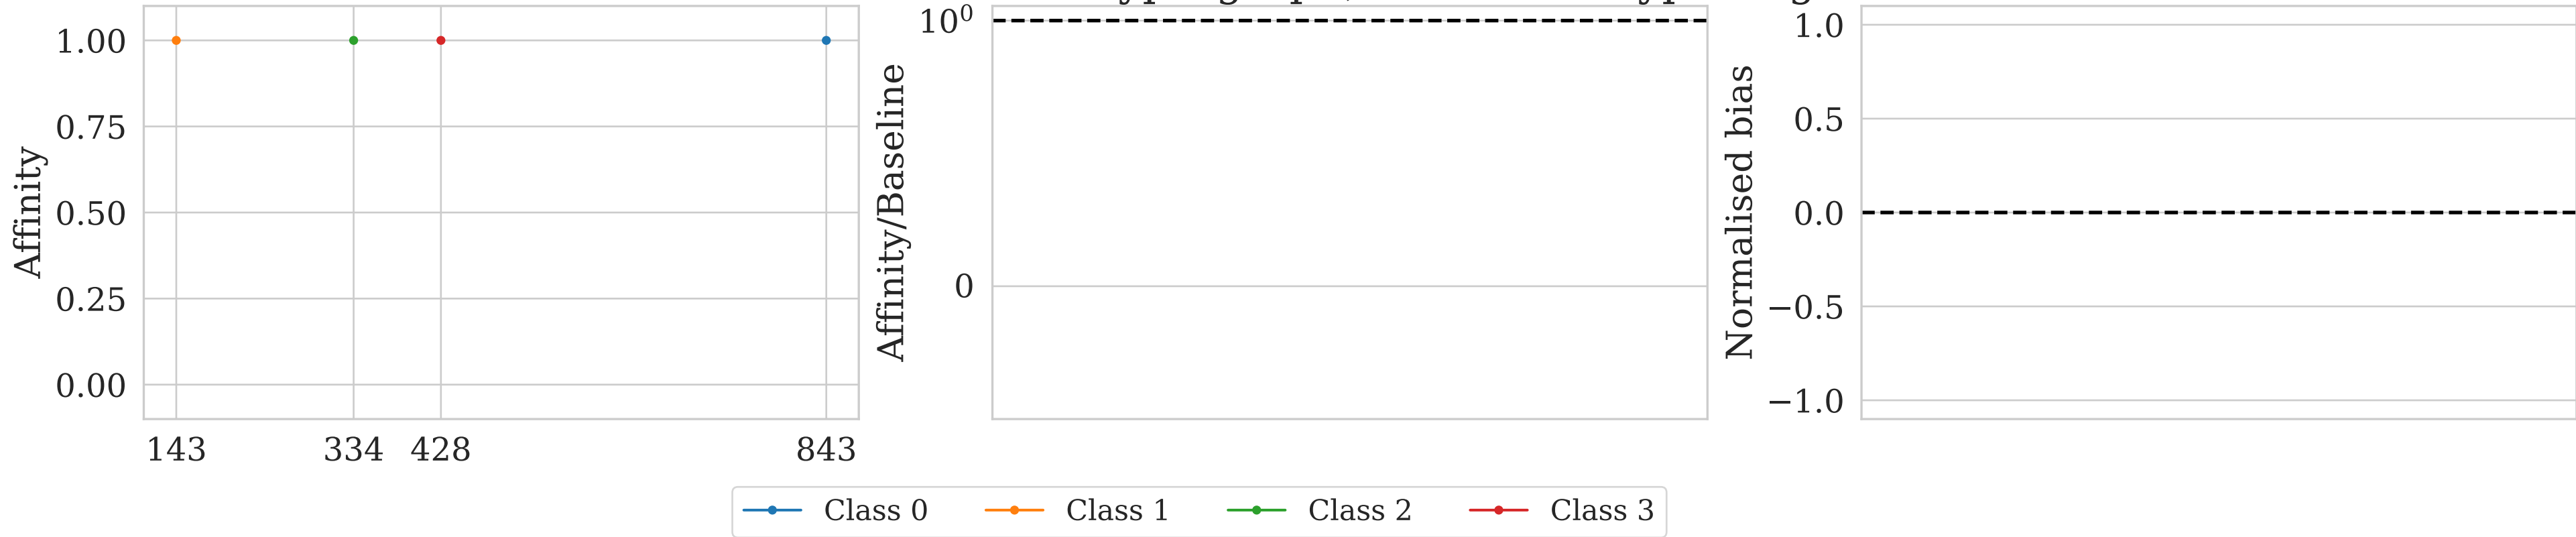

1796-uniform hypergraph, number of hyperedges: 1

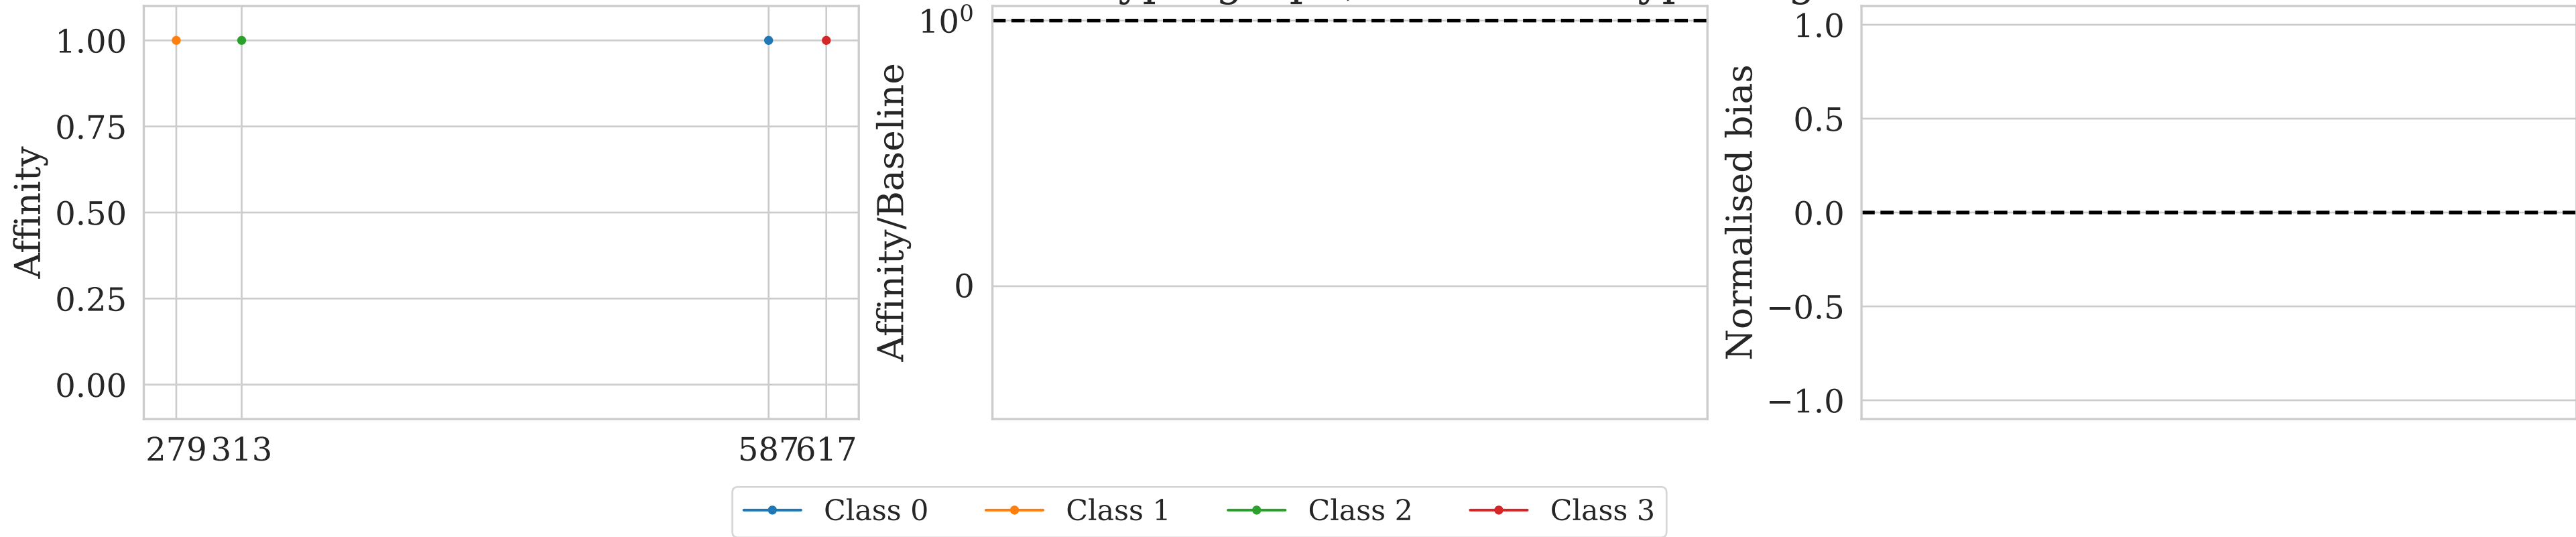

1936-uniform hypergraph, number of hyperedges: 1

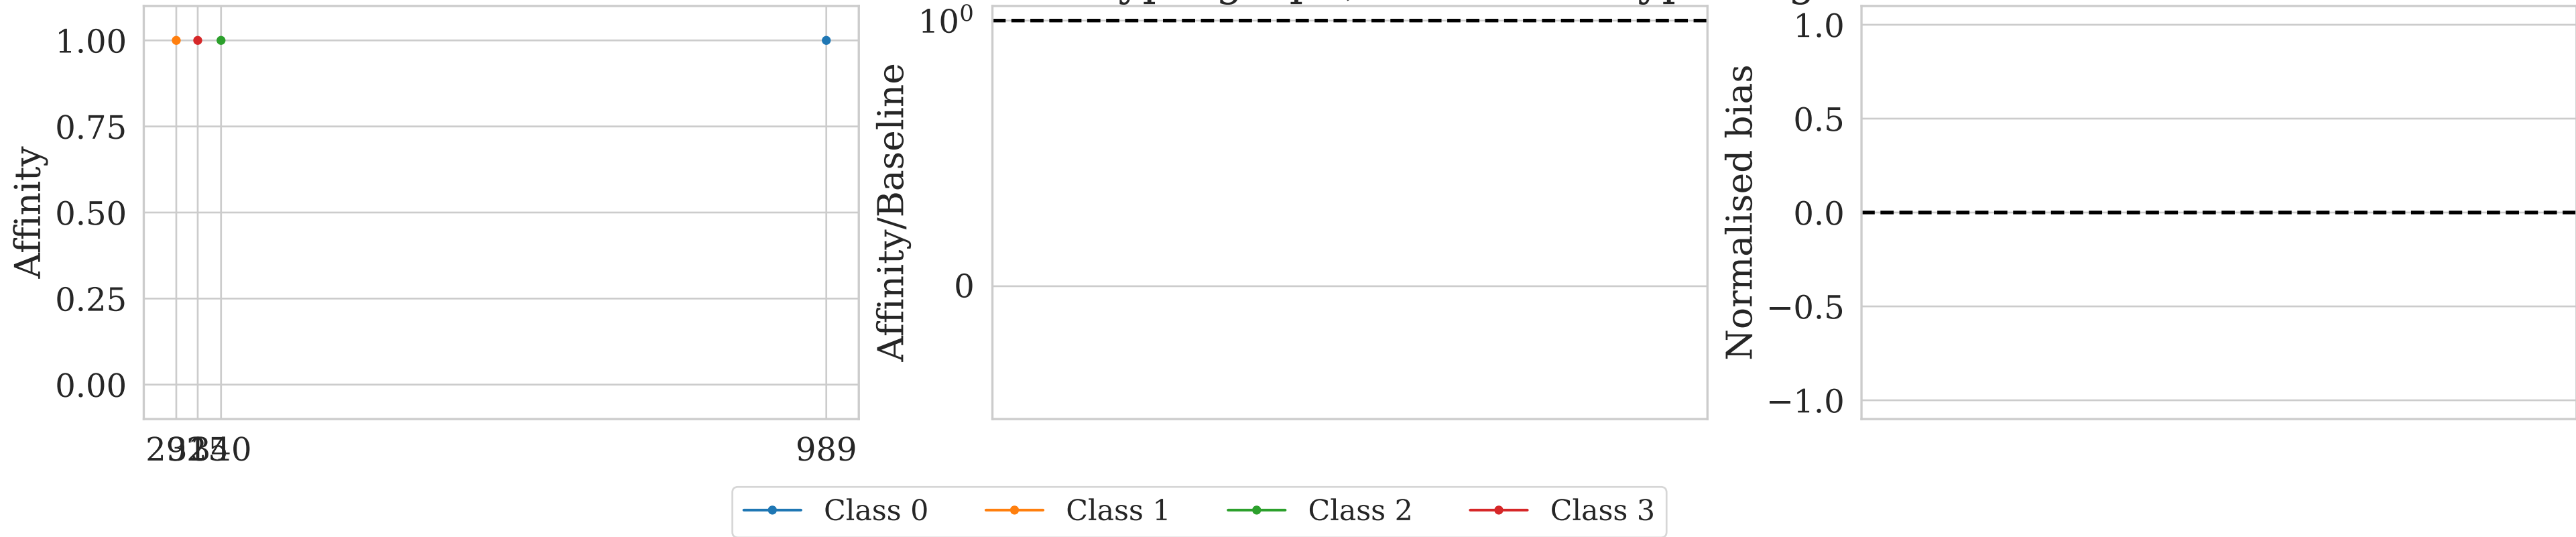



2106-uniform hypergraph, number of hyperedges: 1

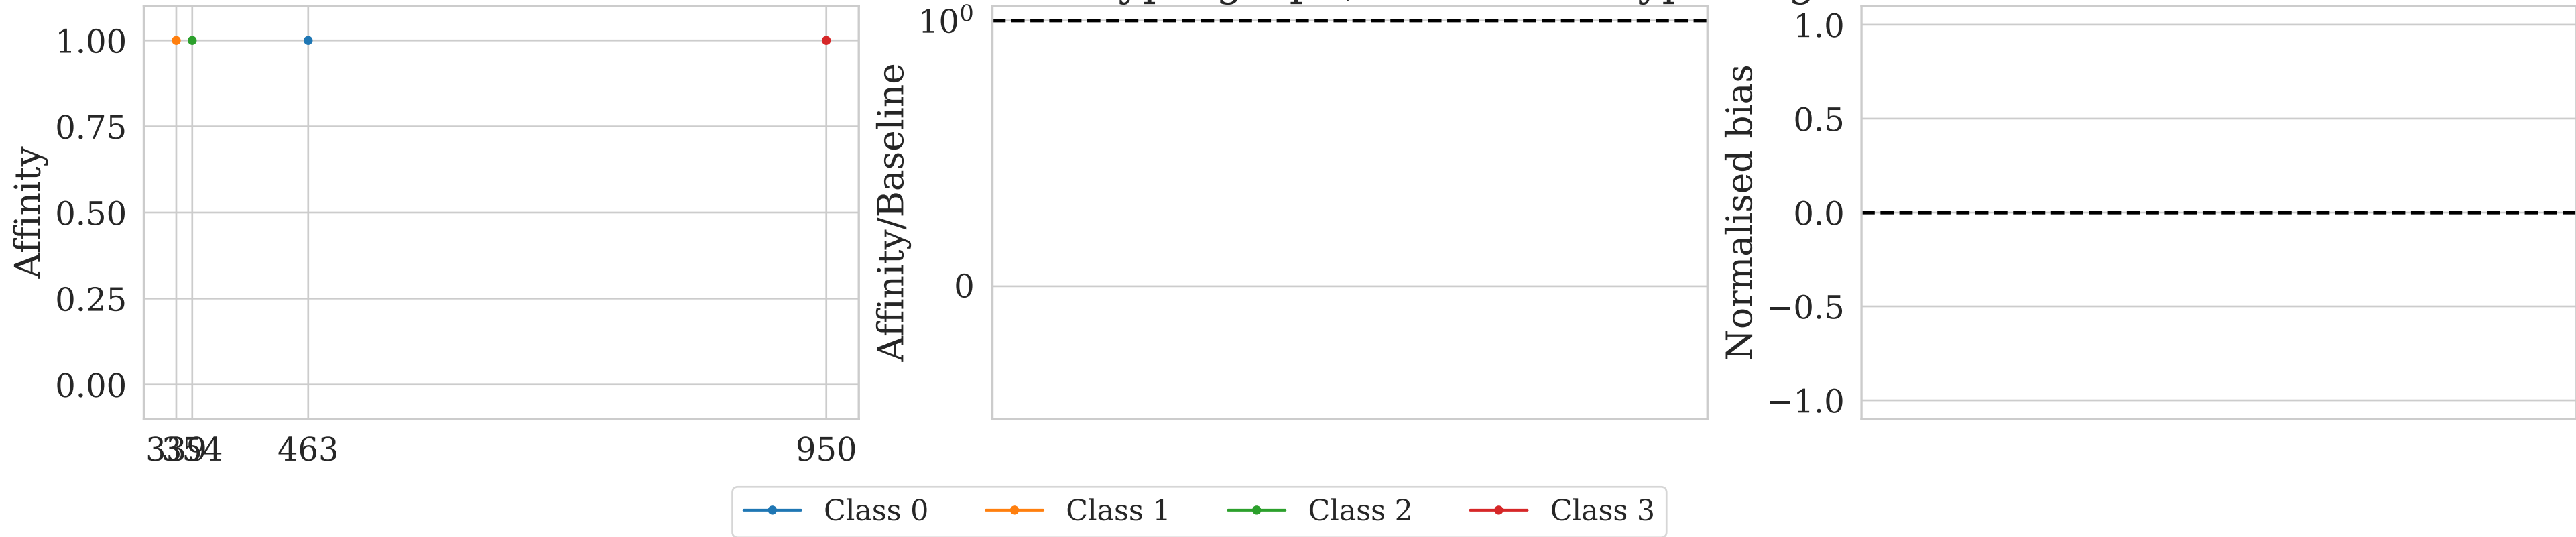

850-uniform hypergraph, number of hyperedges: 1

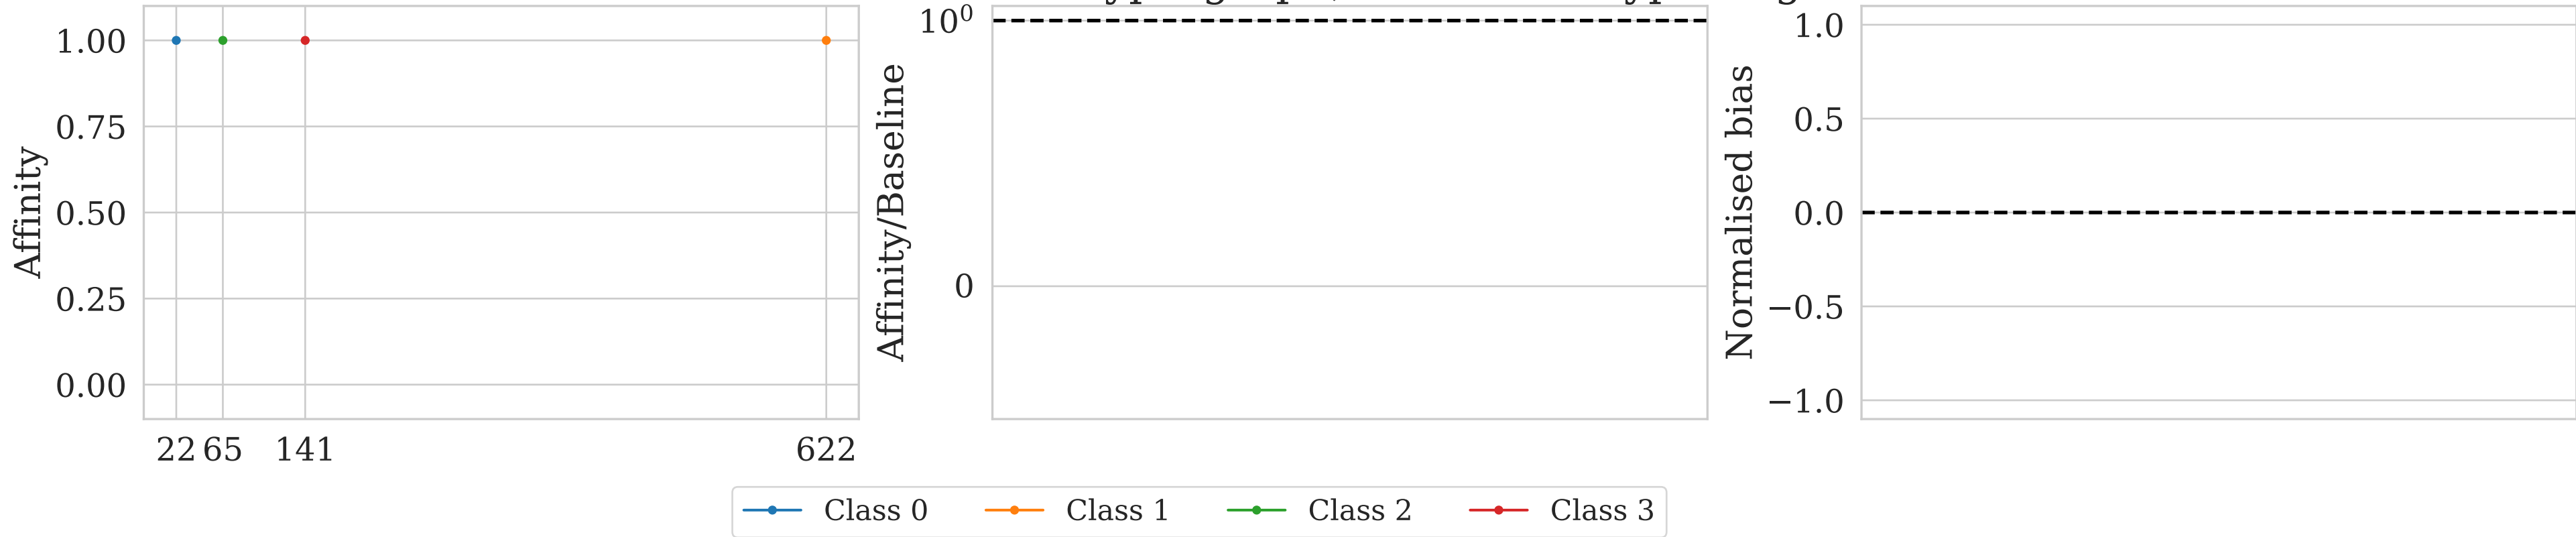

847-uniform hypergraph, number of hyperedges: 1

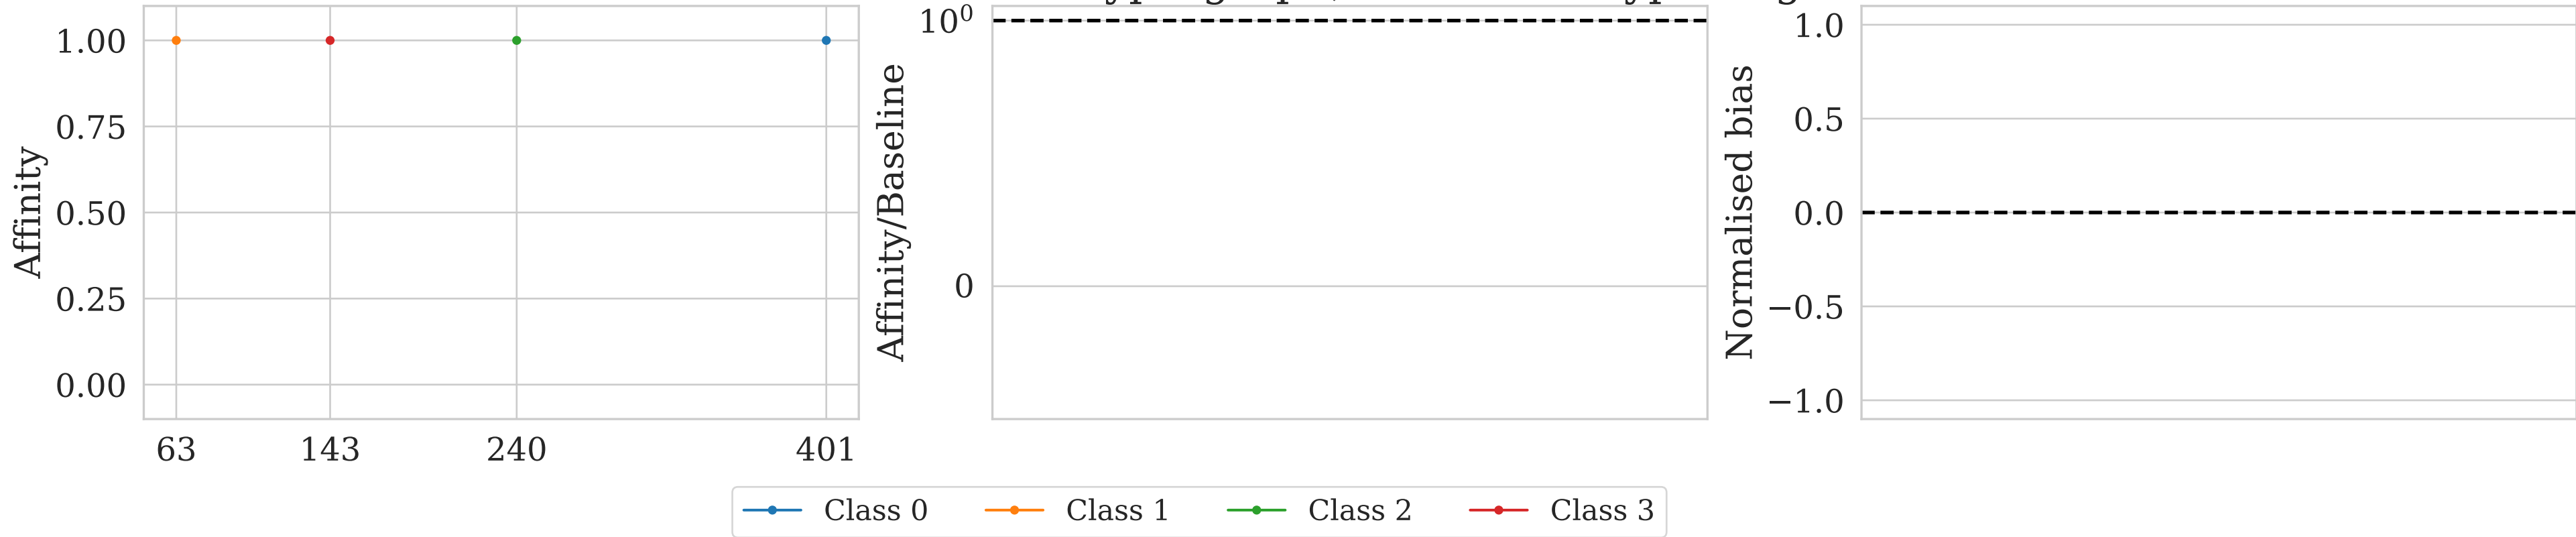

803-uniform hypergraph, number of hyperedges: 1

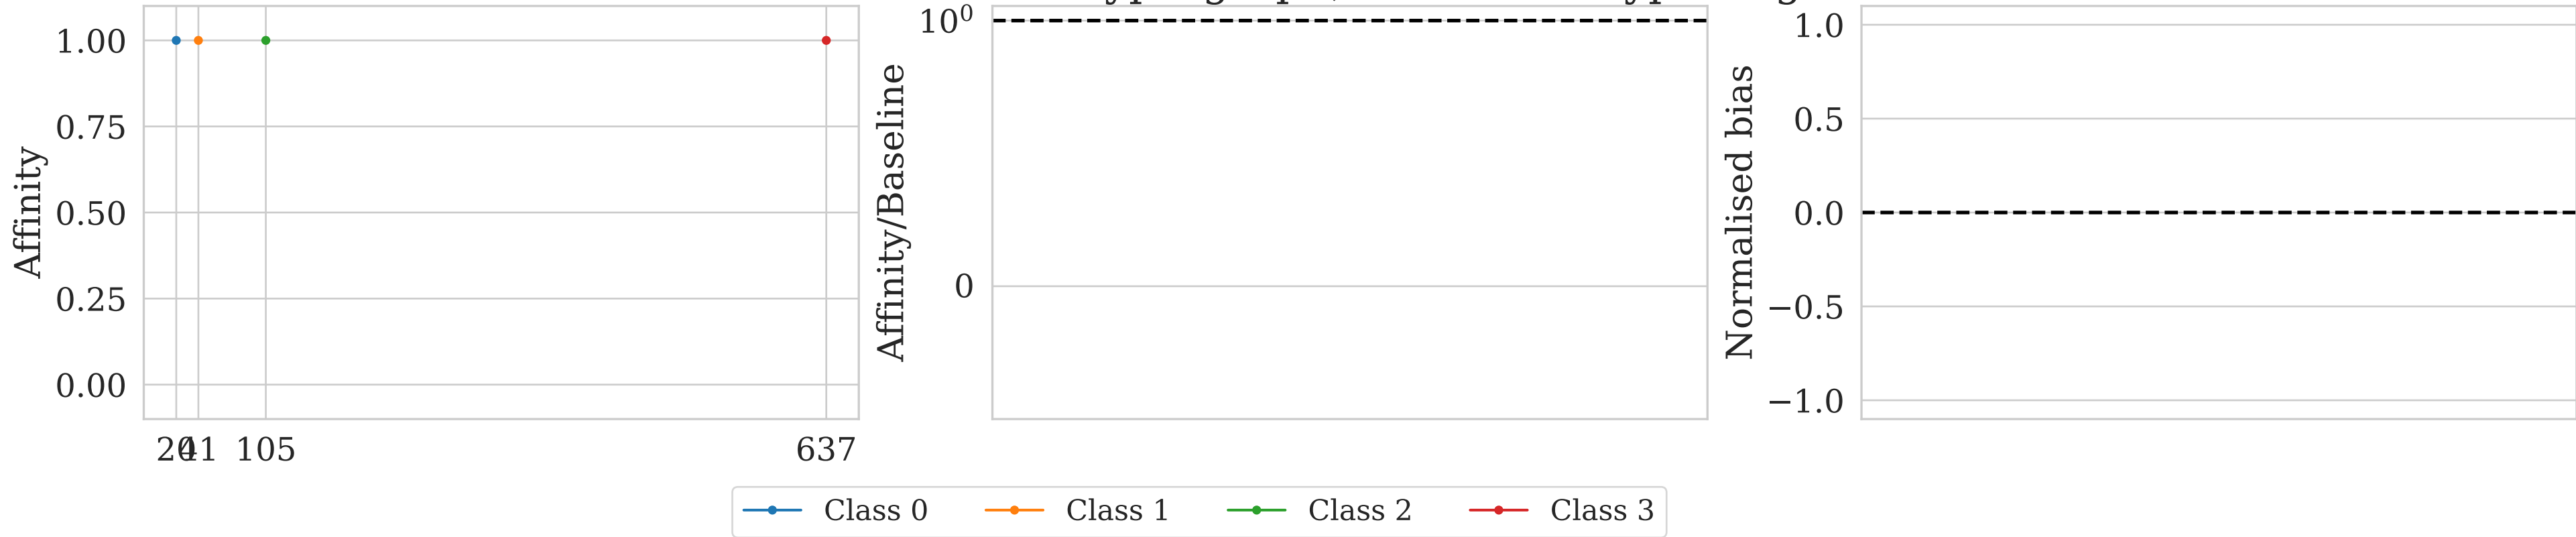

649-uniform hypergraph, number of hyperedges: 1

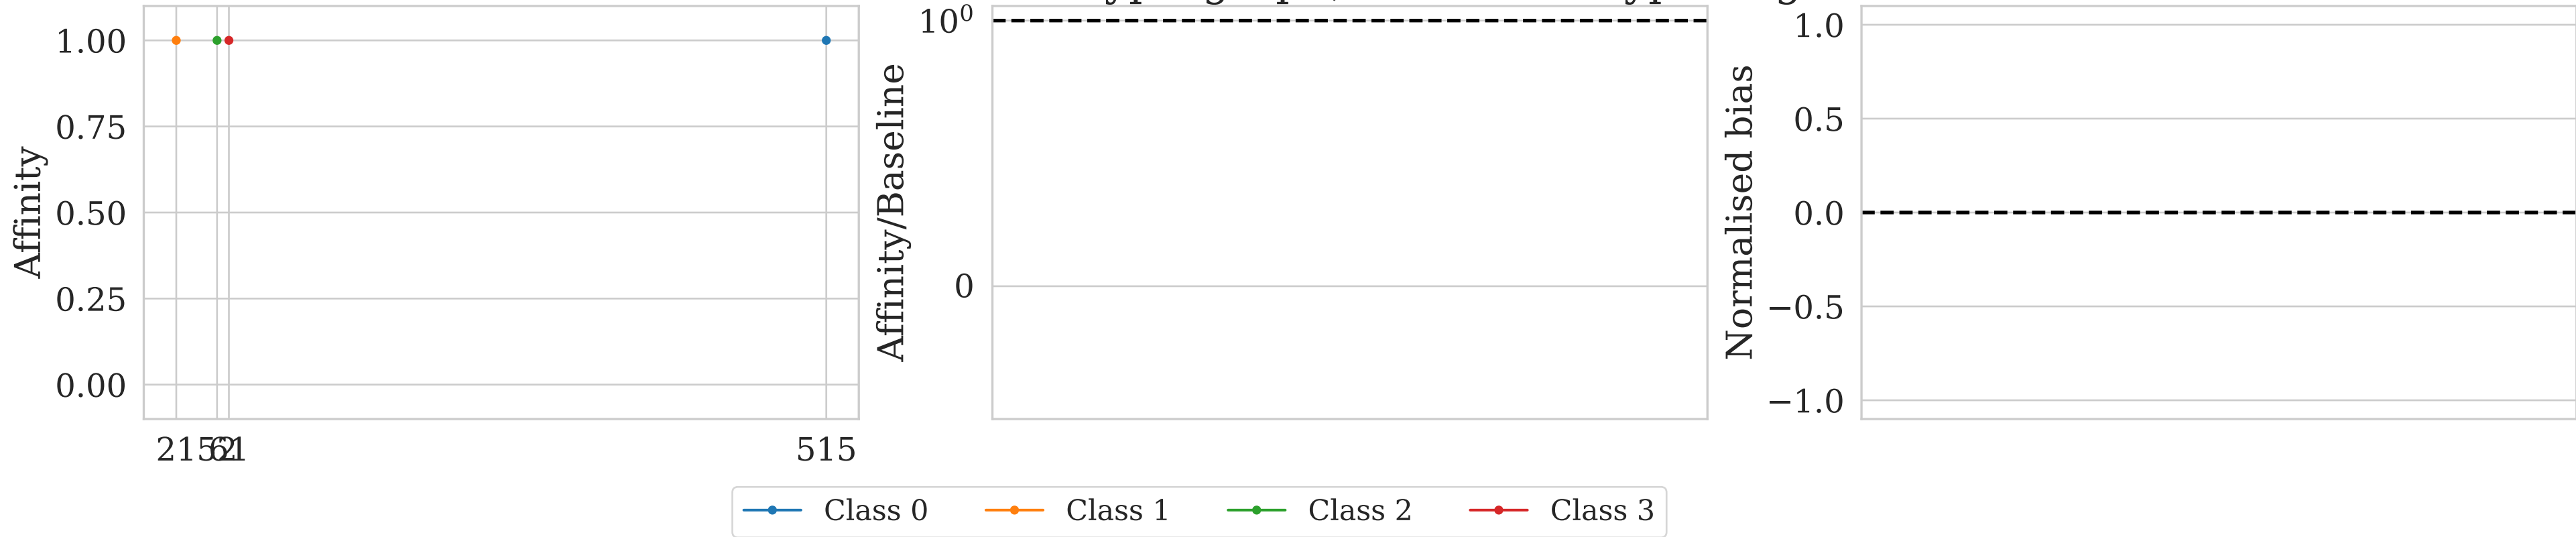

582-uniform hypergraph, number of hyperedges: 1

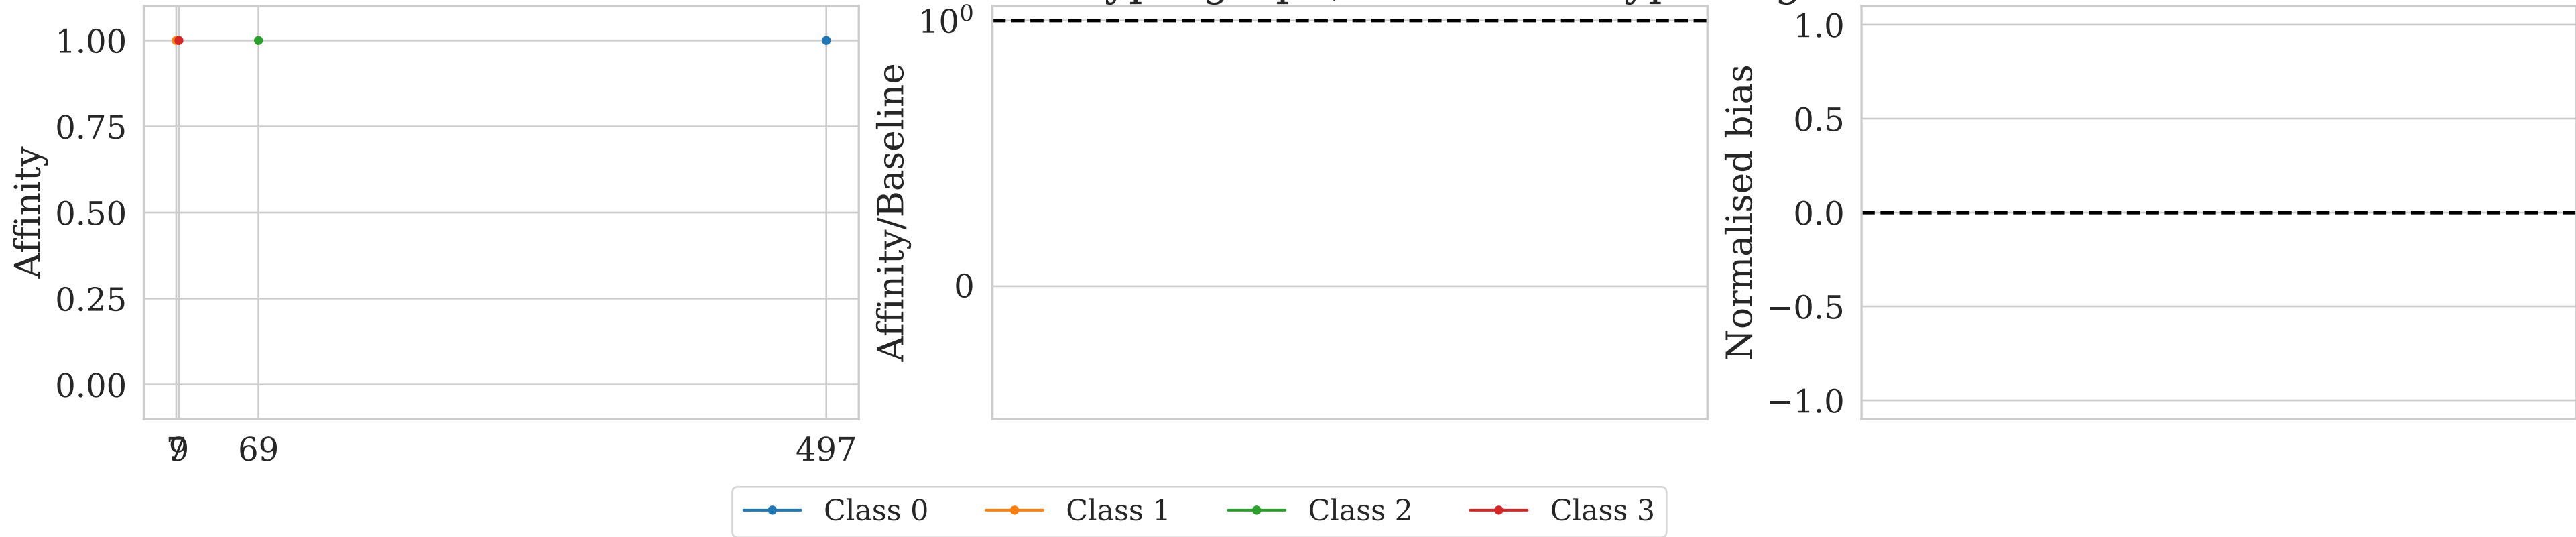

583-uniform hypergraph, number of hyperedges: 1

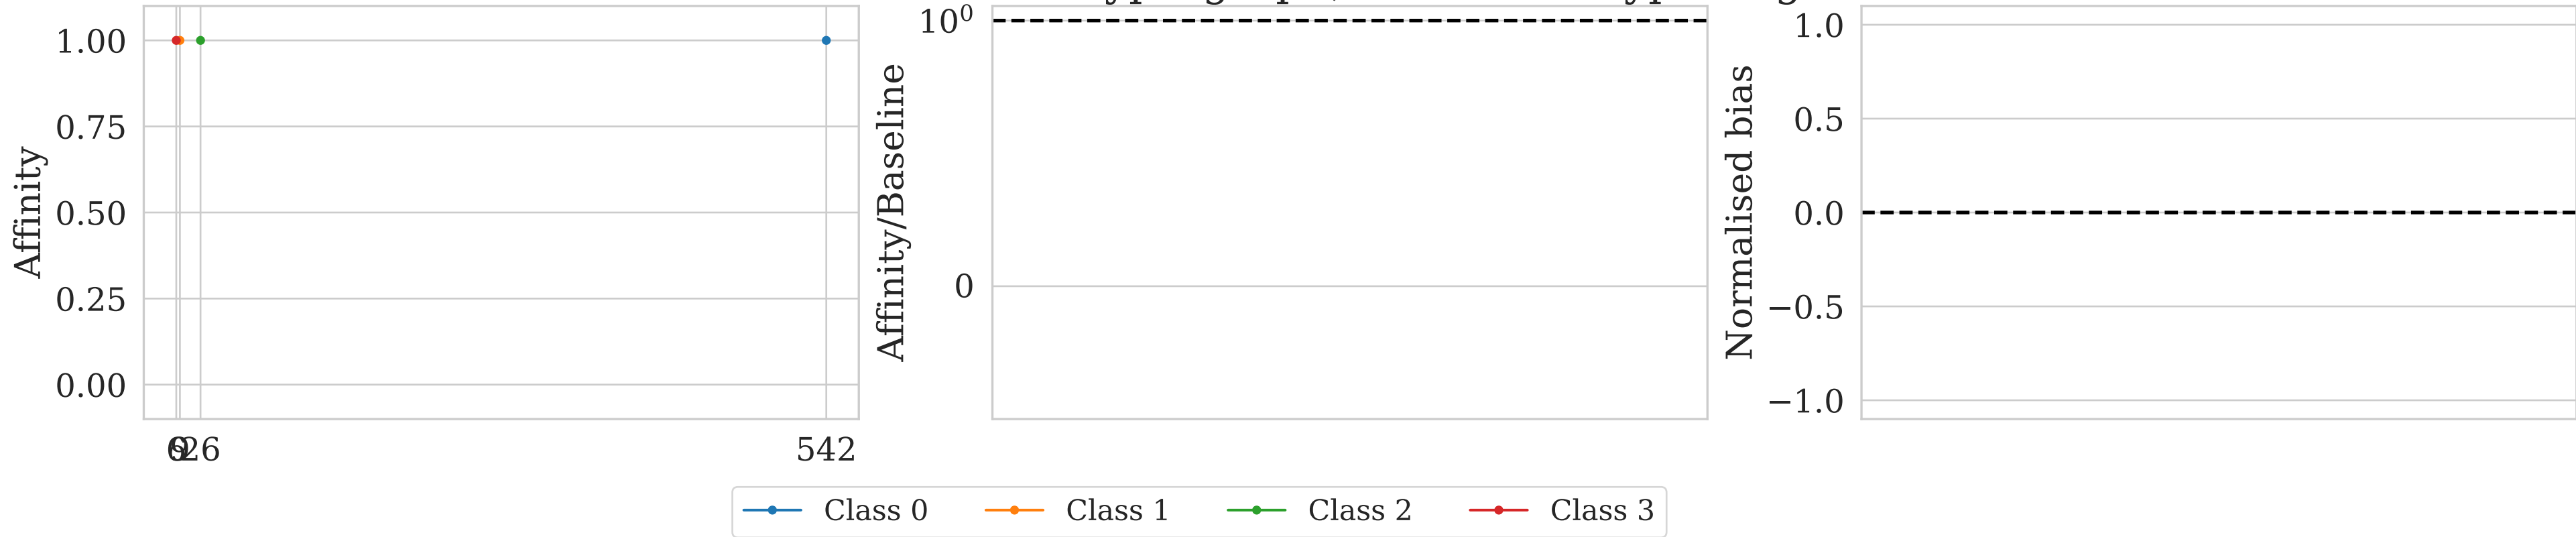

600-uniform hypergraph, number of hyperedges: 1

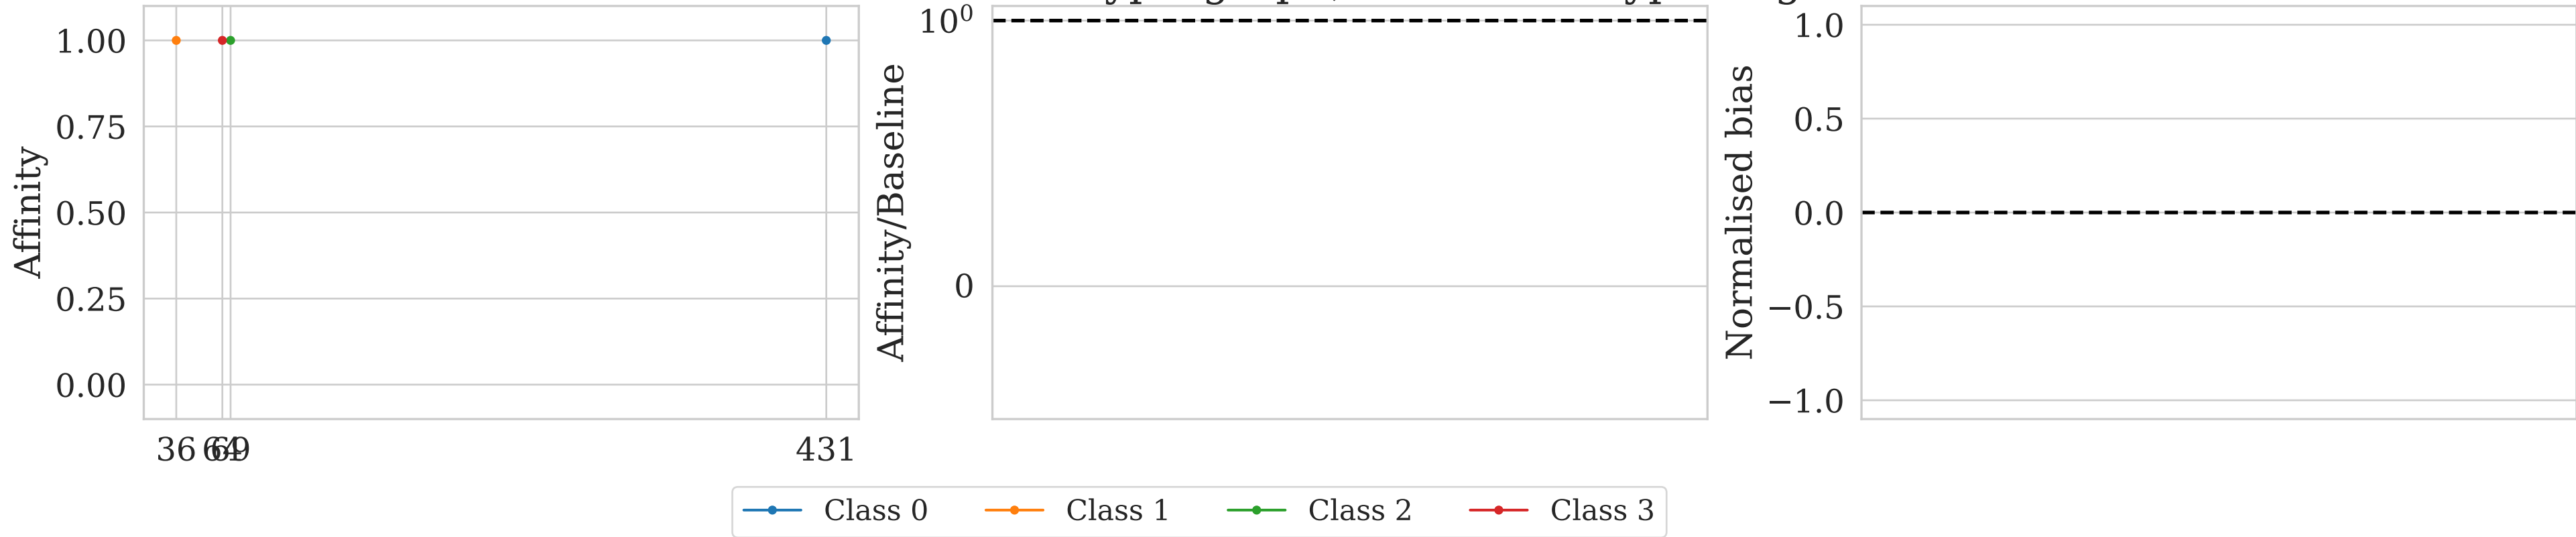



603-uniform hypergraph, number of hyperedges: 1

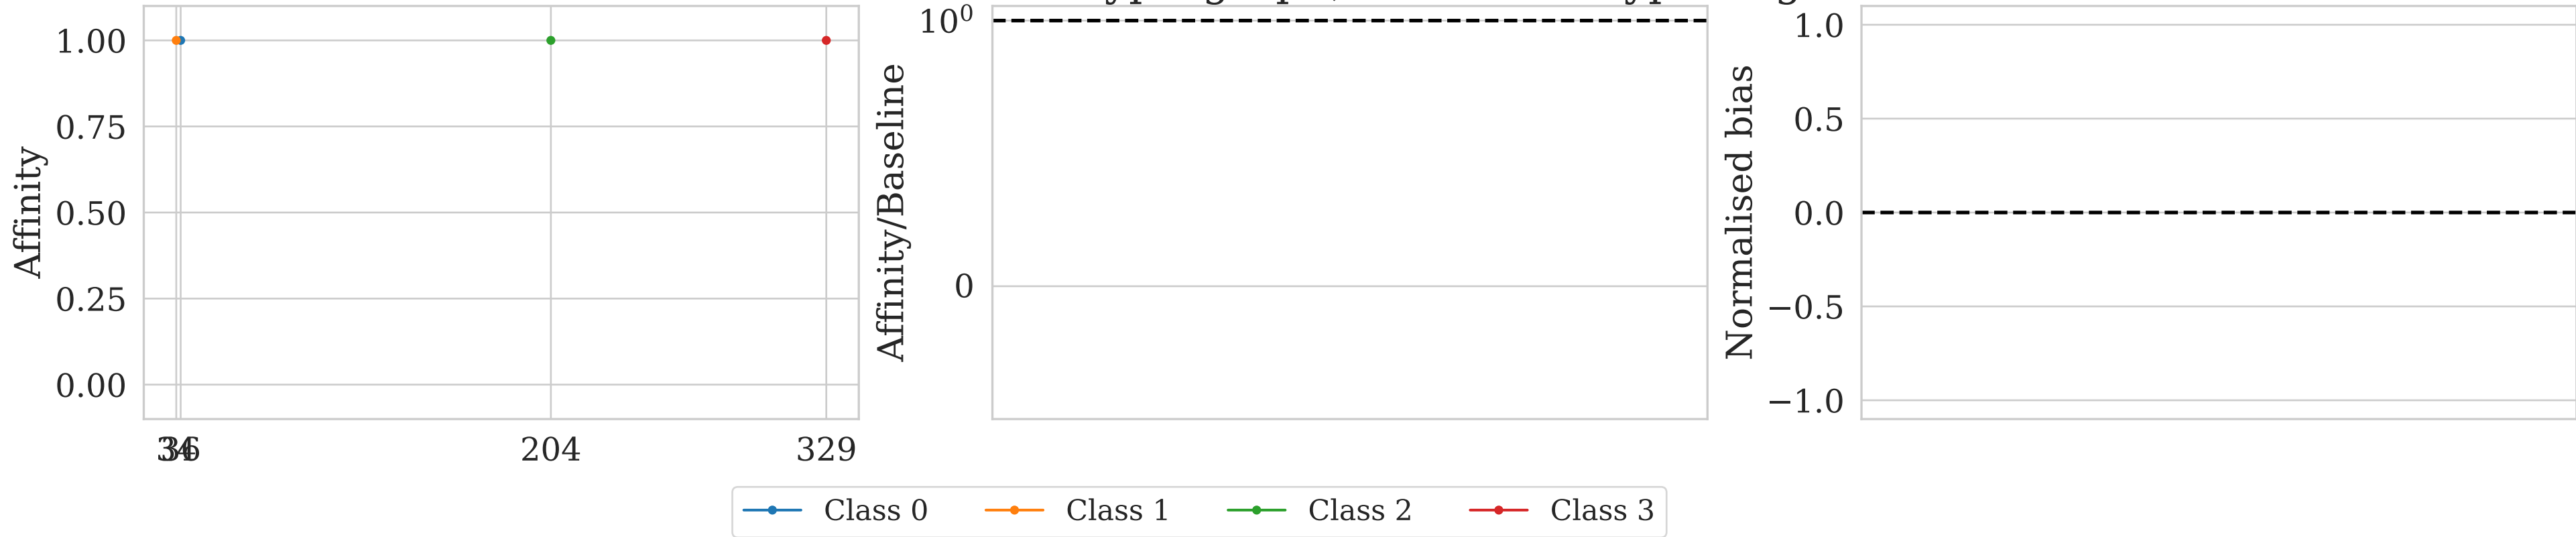

610-uniform hypergraph, number of hyperedges: 1

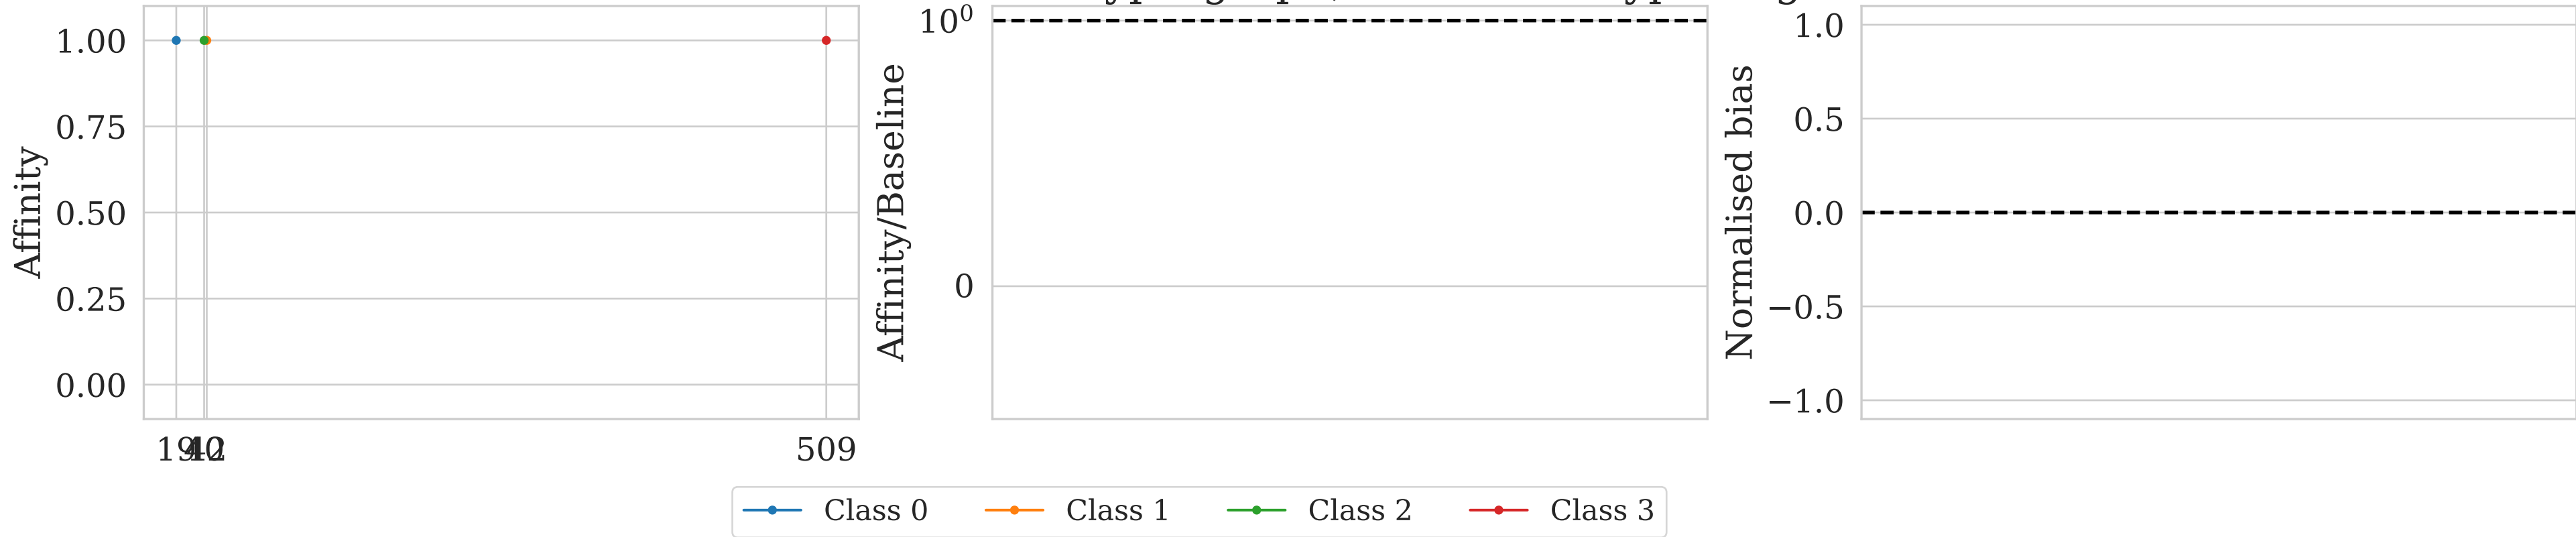

622-uniform hypergraph, number of hyperedges: 1

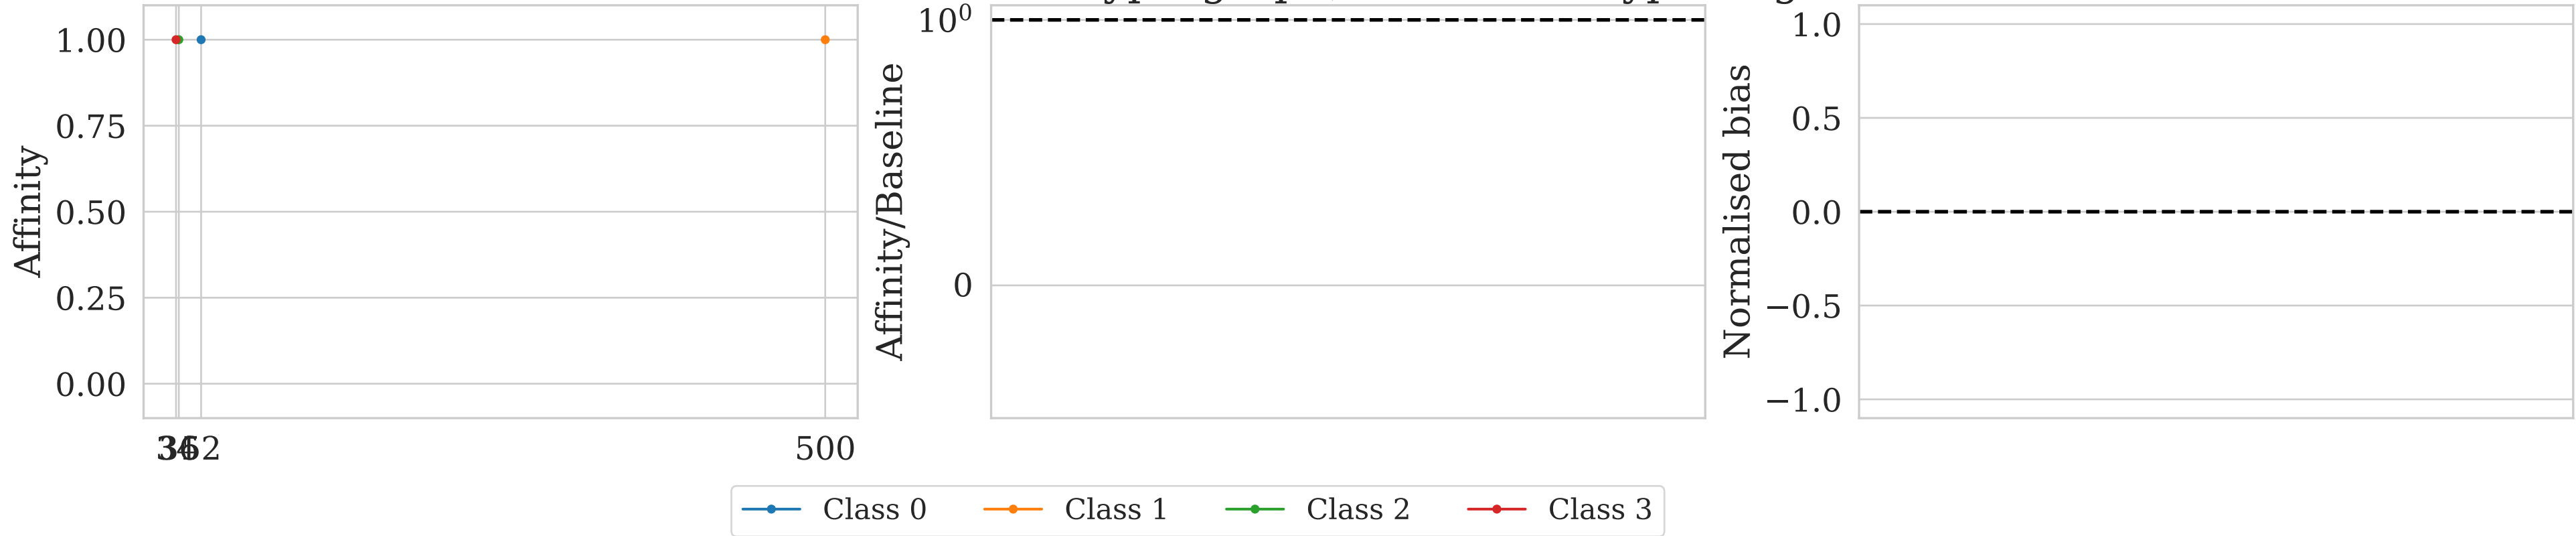

625-uniform hypergraph, number of hyperedges: 1

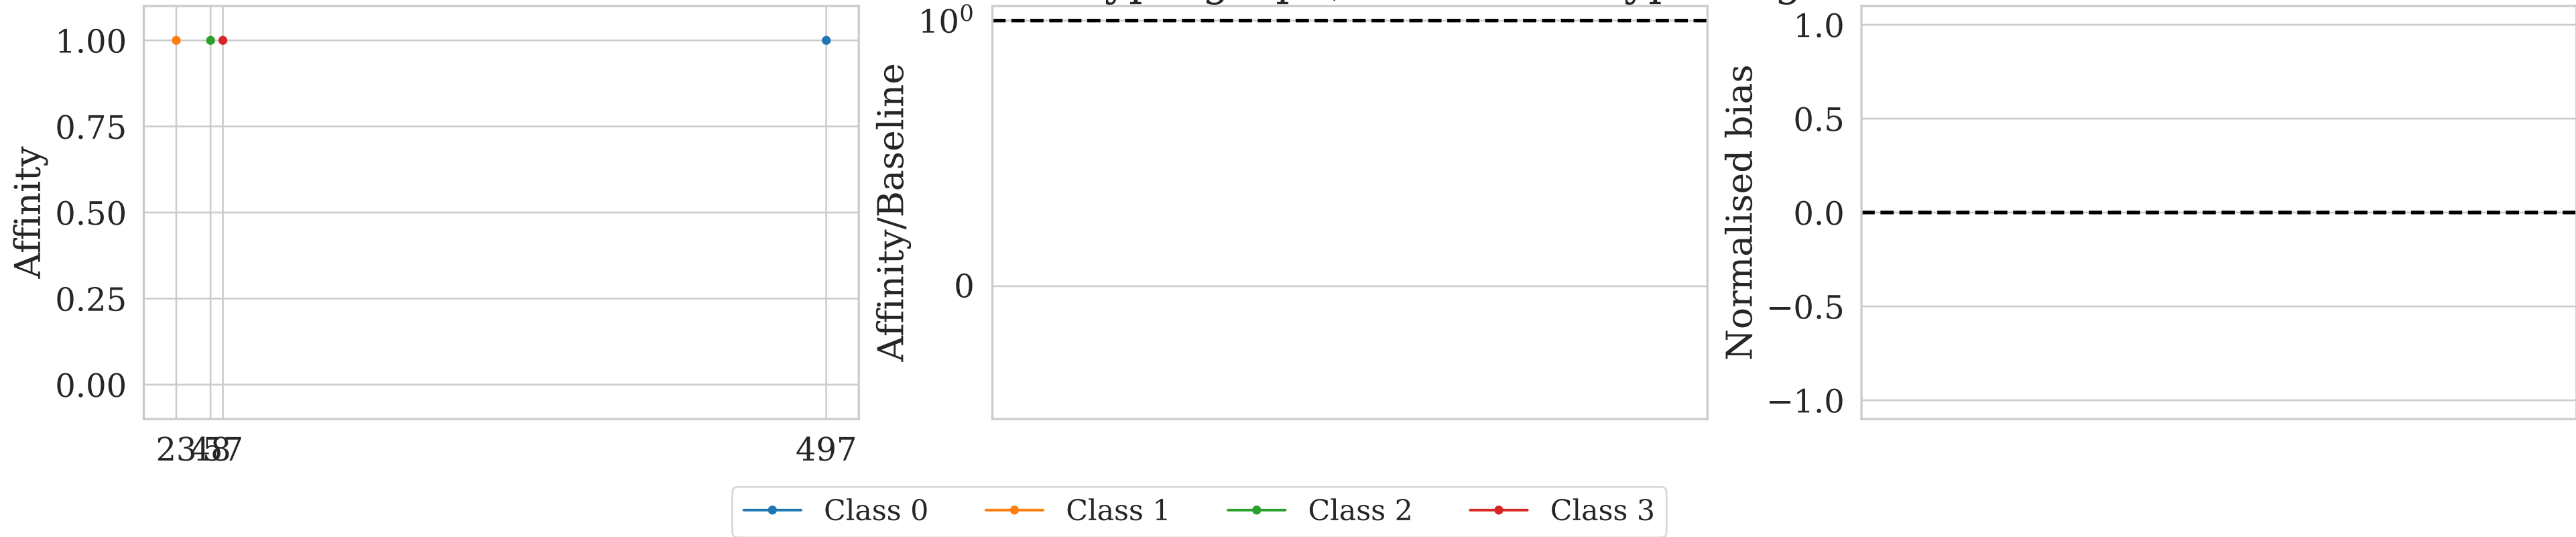

629-uniform hypergraph, number of hyperedges: 1

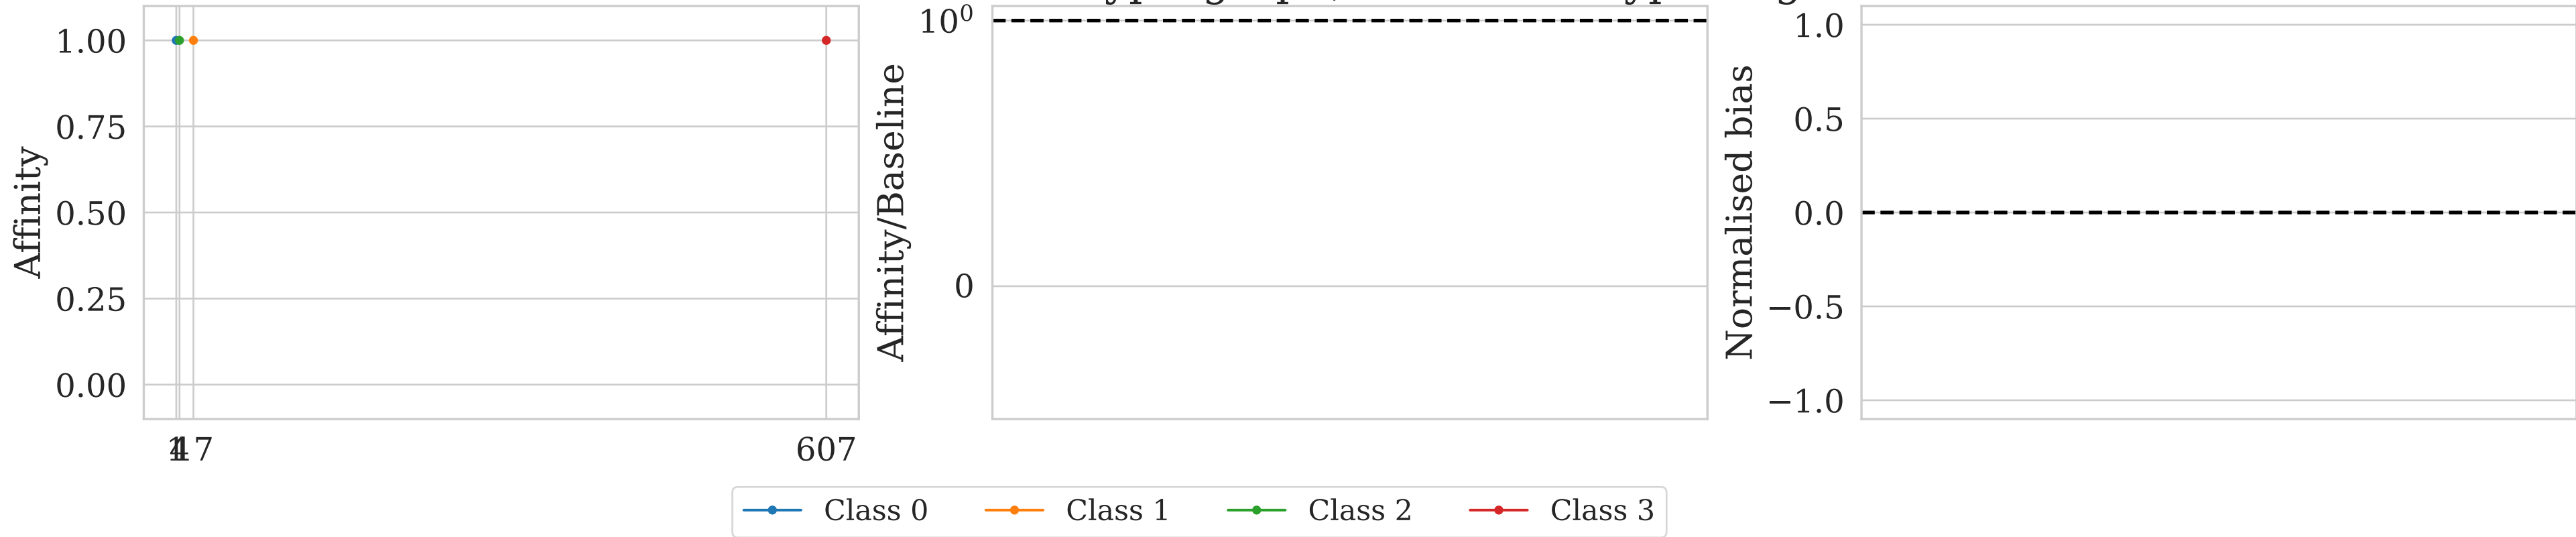

638-uniform hypergraph, number of hyperedges: 1

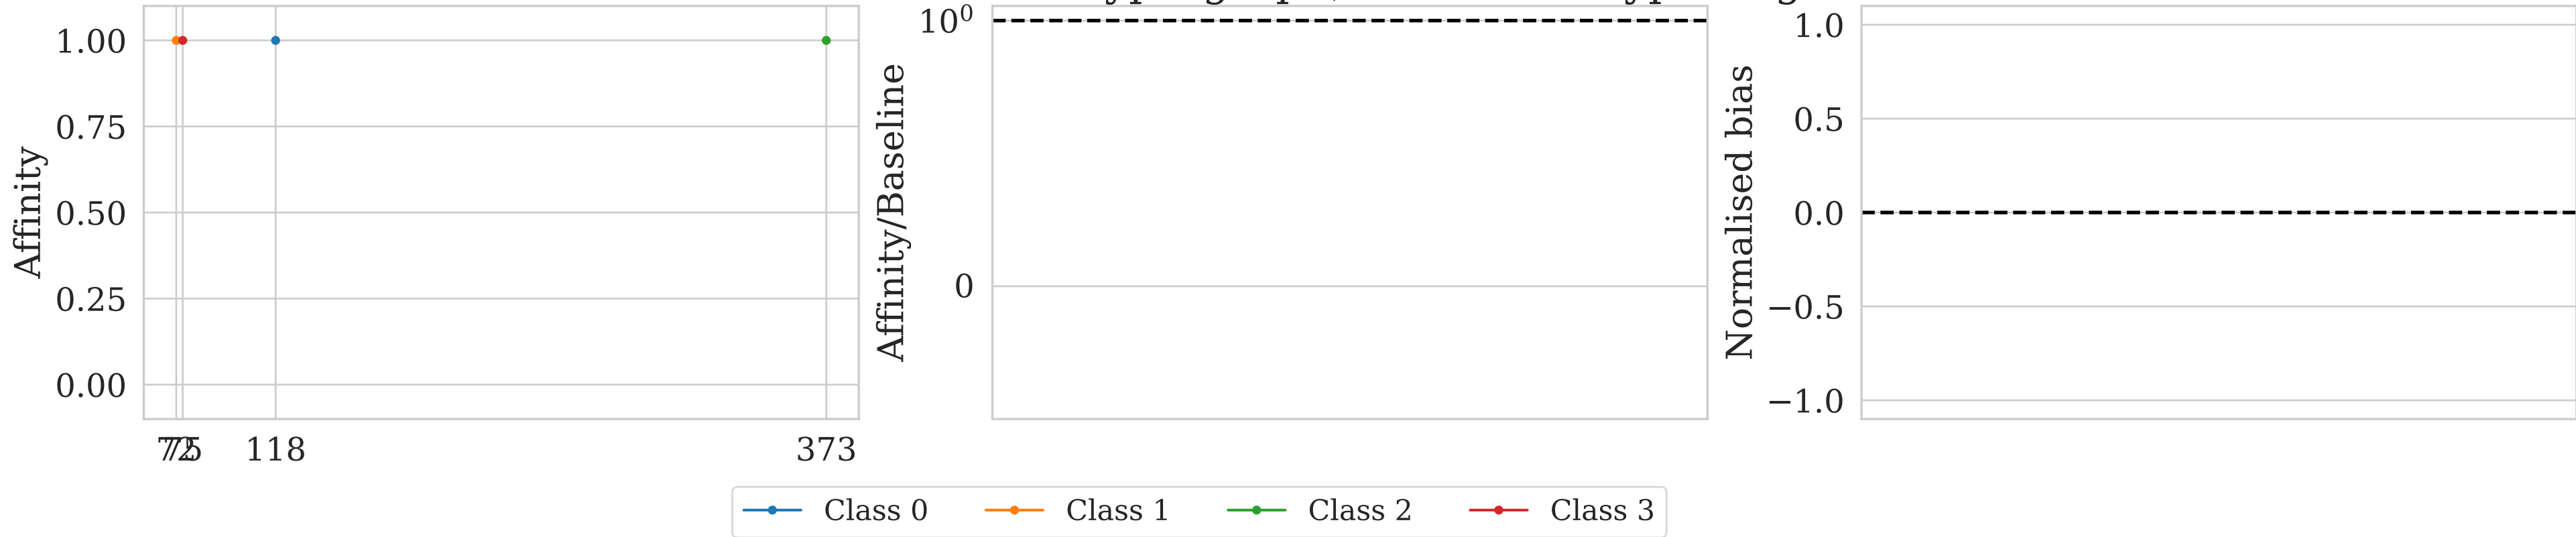

682-uniform hypergraph, number of hyperedges: 1

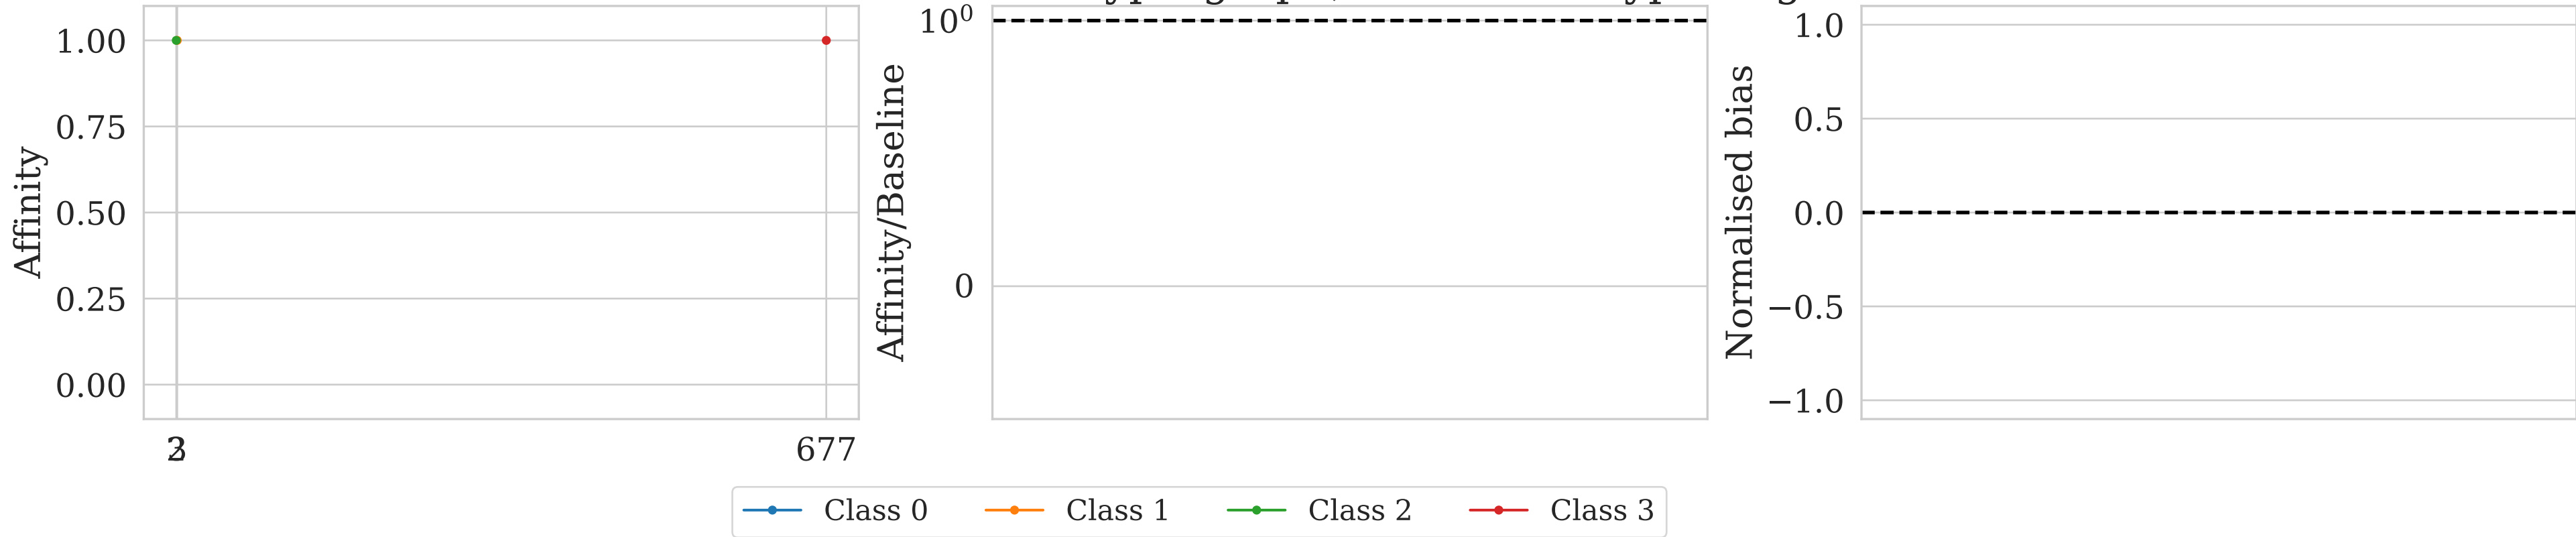

799-uniform hypergraph, number of hyperedges: 1

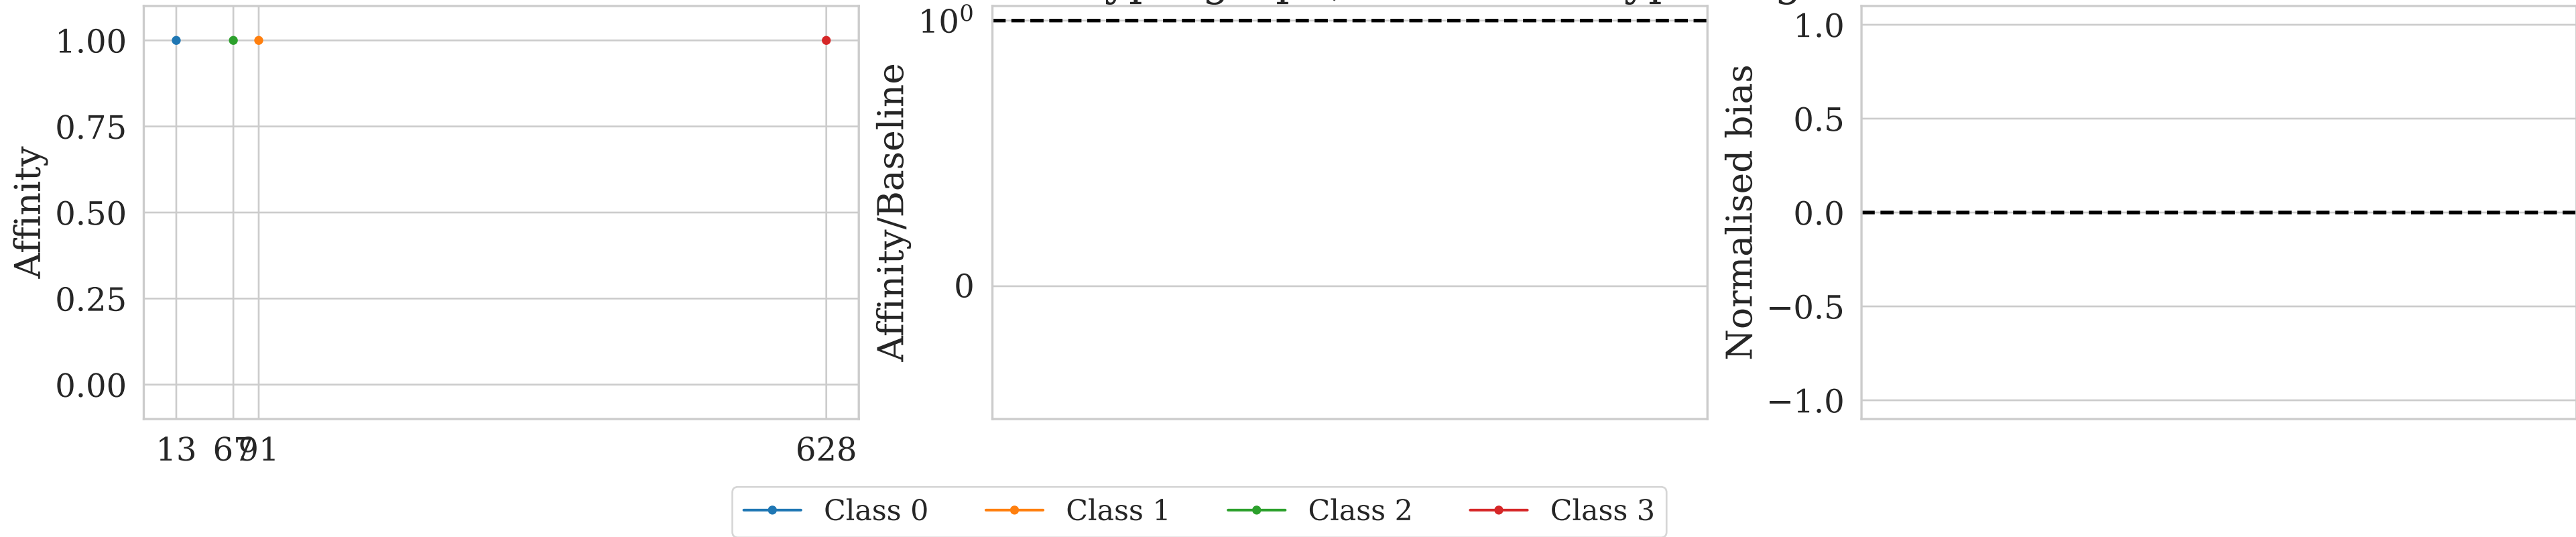



686-uniform hypergraph, number of hyperedges: 1

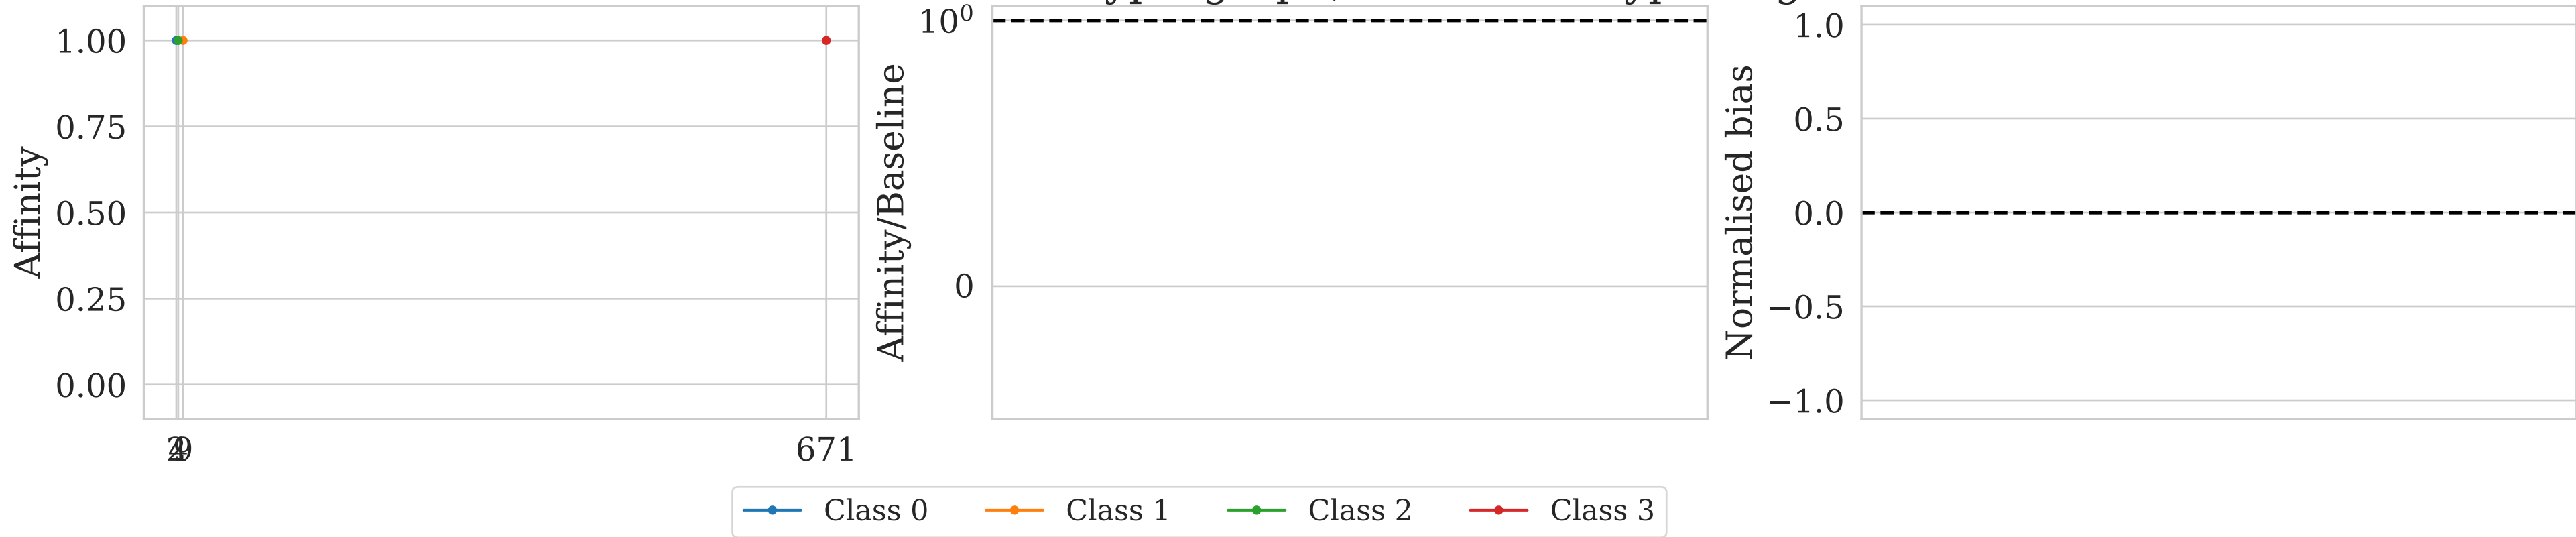

704-uniform hypergraph, number of hyperedges: 1

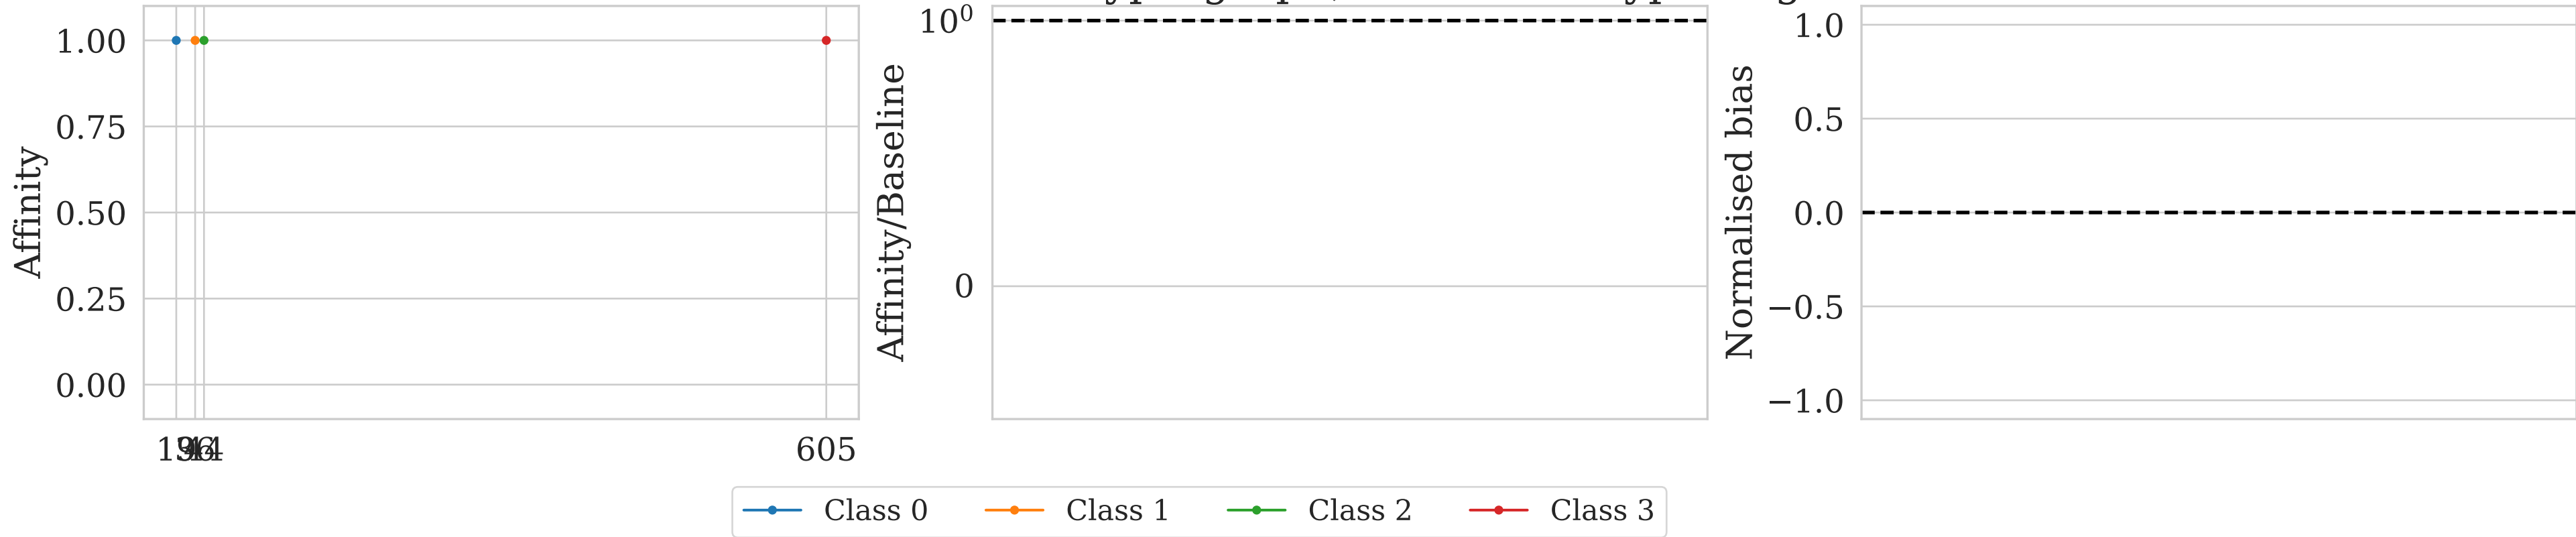

720-uniform hypergraph, number of hyperedges: 1

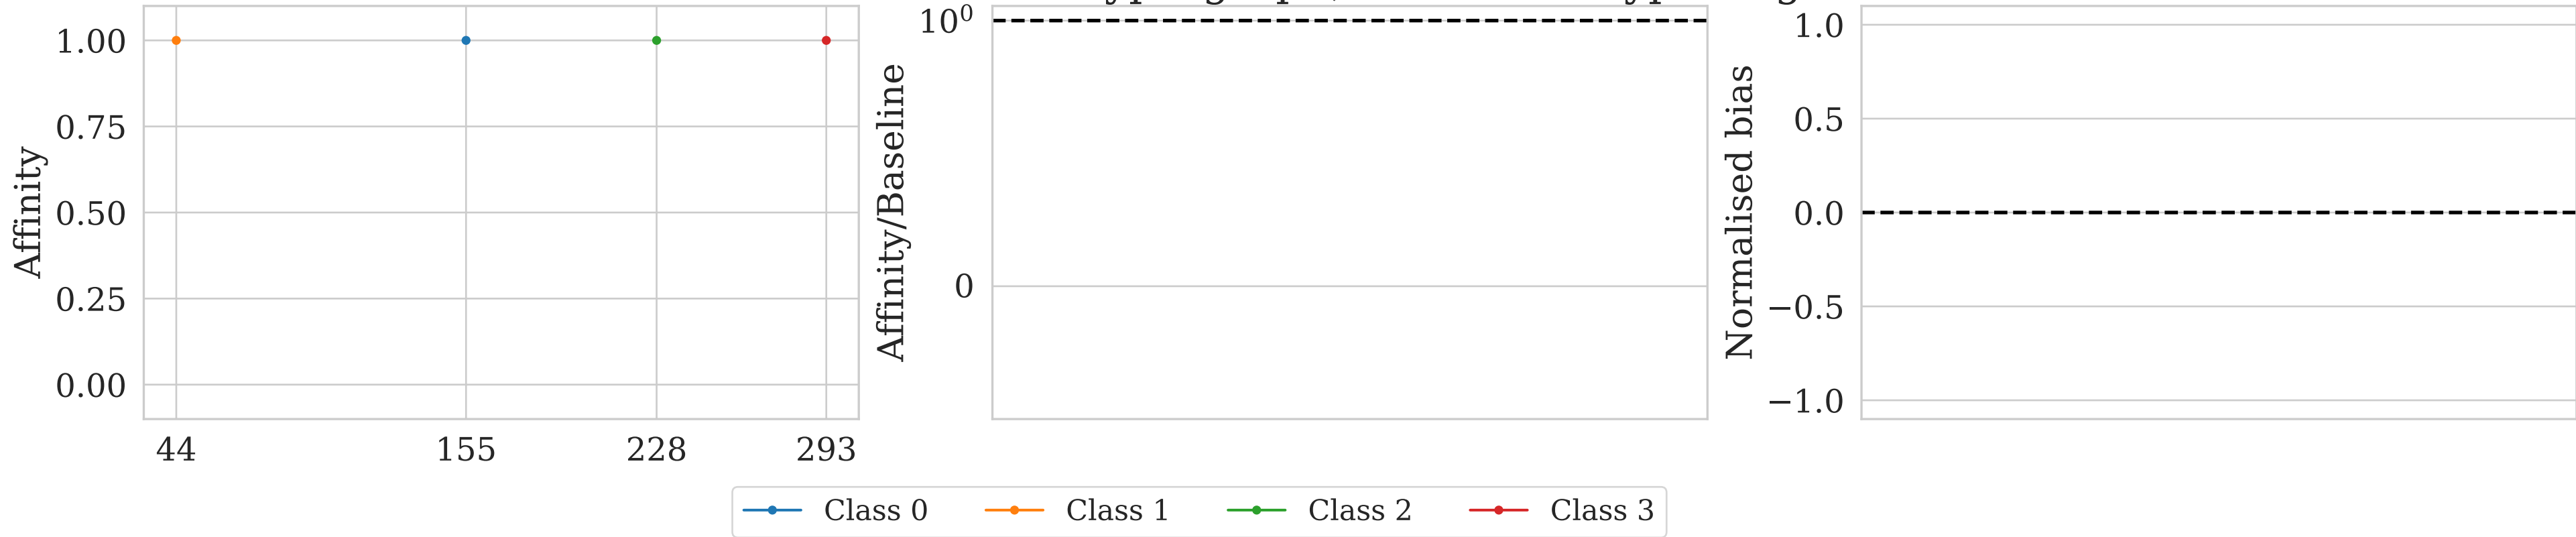

745-uniform hypergraph, number of hyperedges: 1

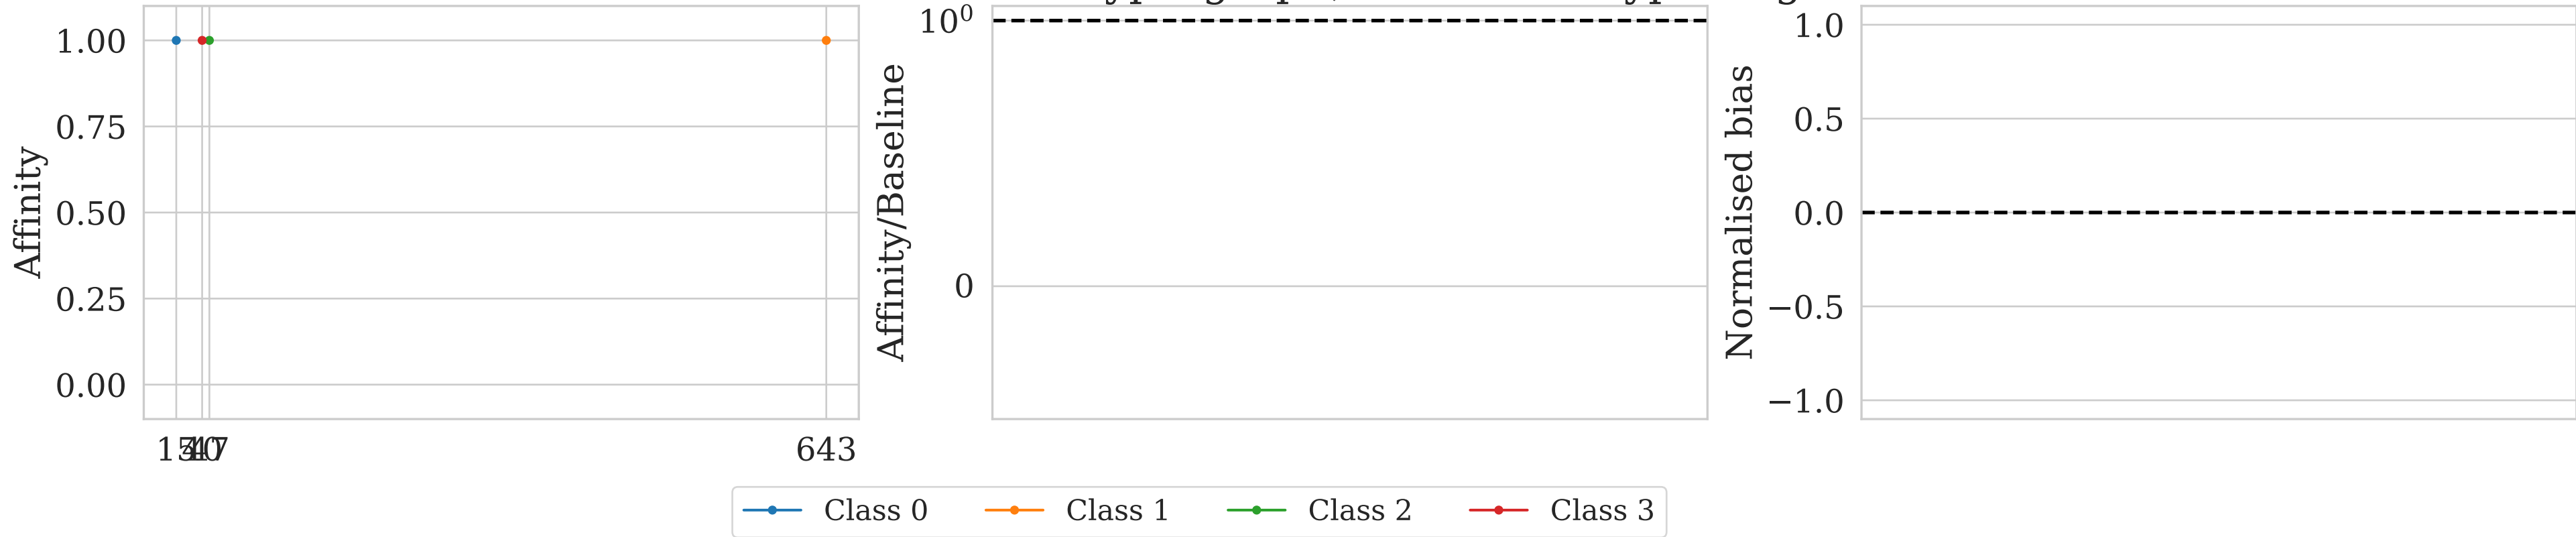

753-uniform hypergraph, number of hyperedges: 1

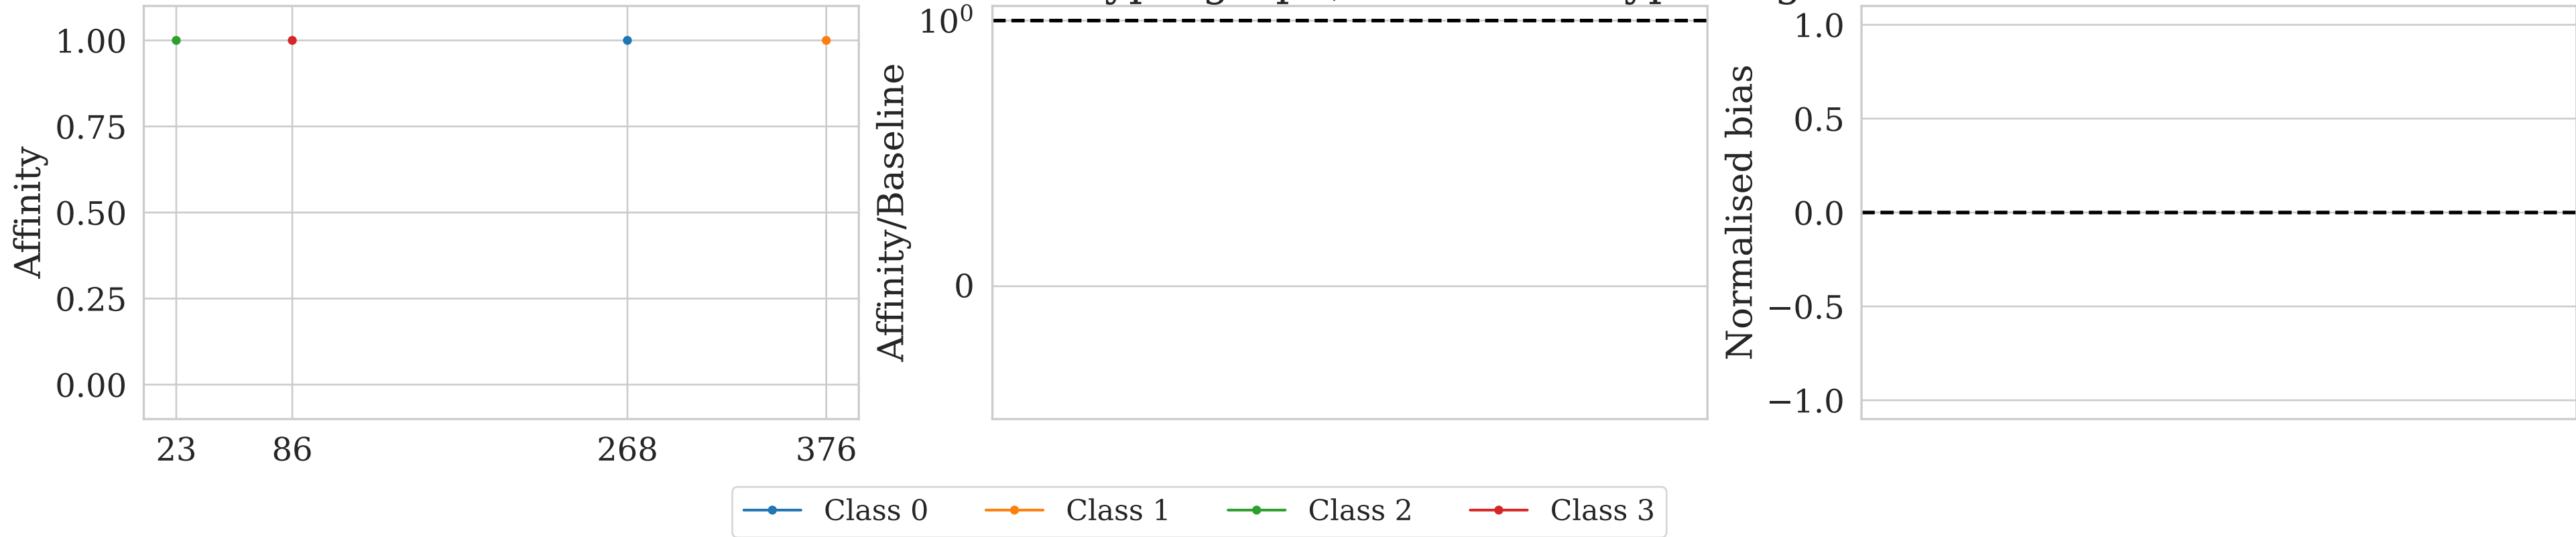

759-uniform hypergraph, number of hyperedges: 1

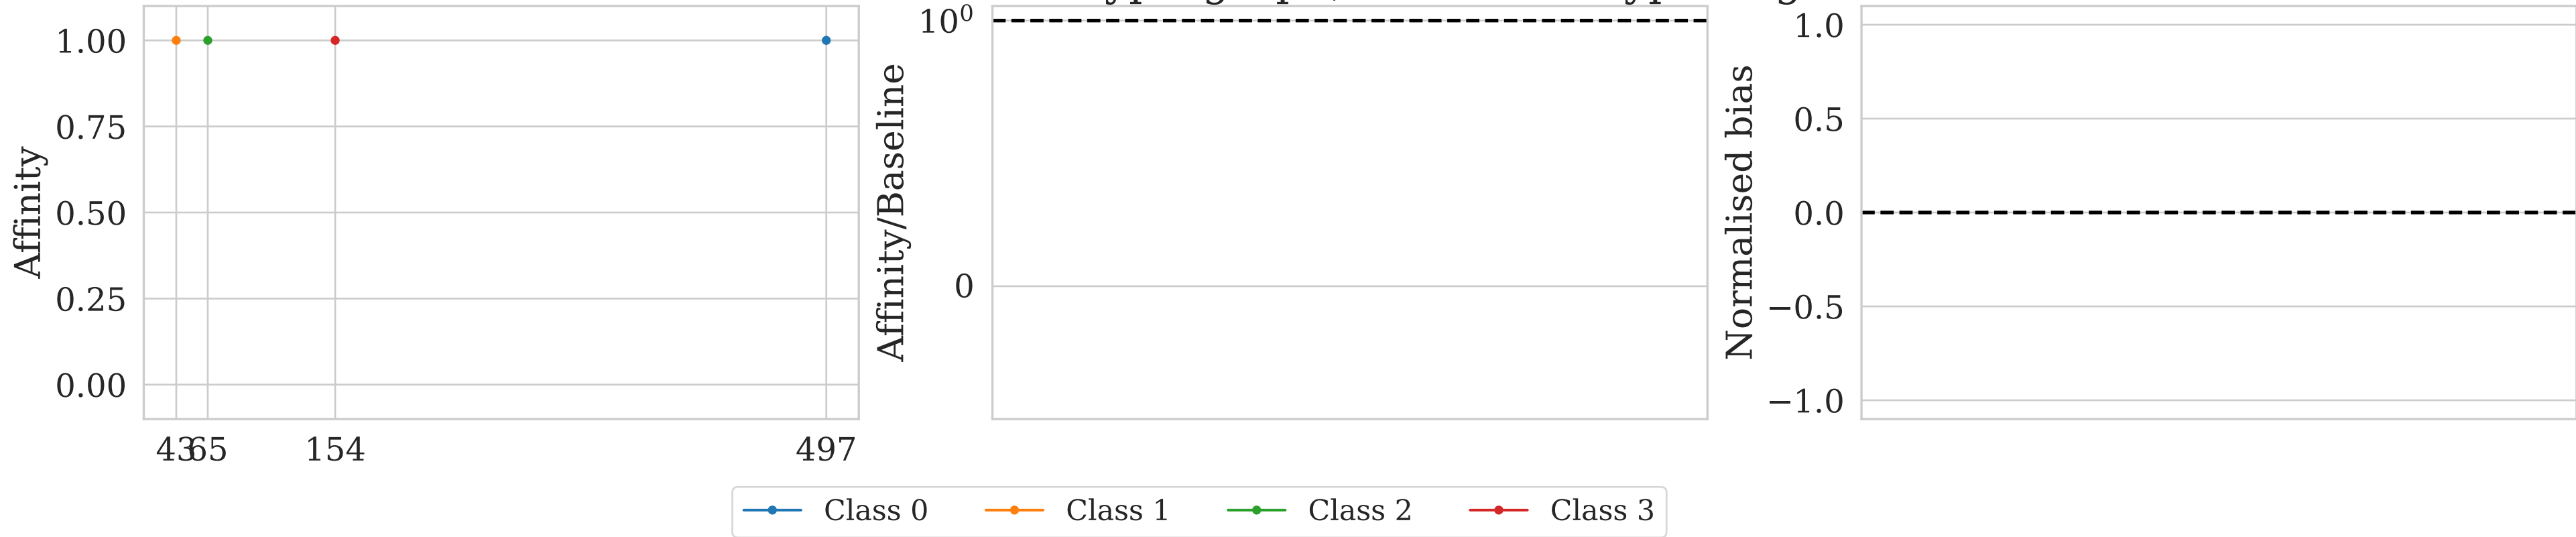

788-uniform hypergraph, number of hyperedges: 1

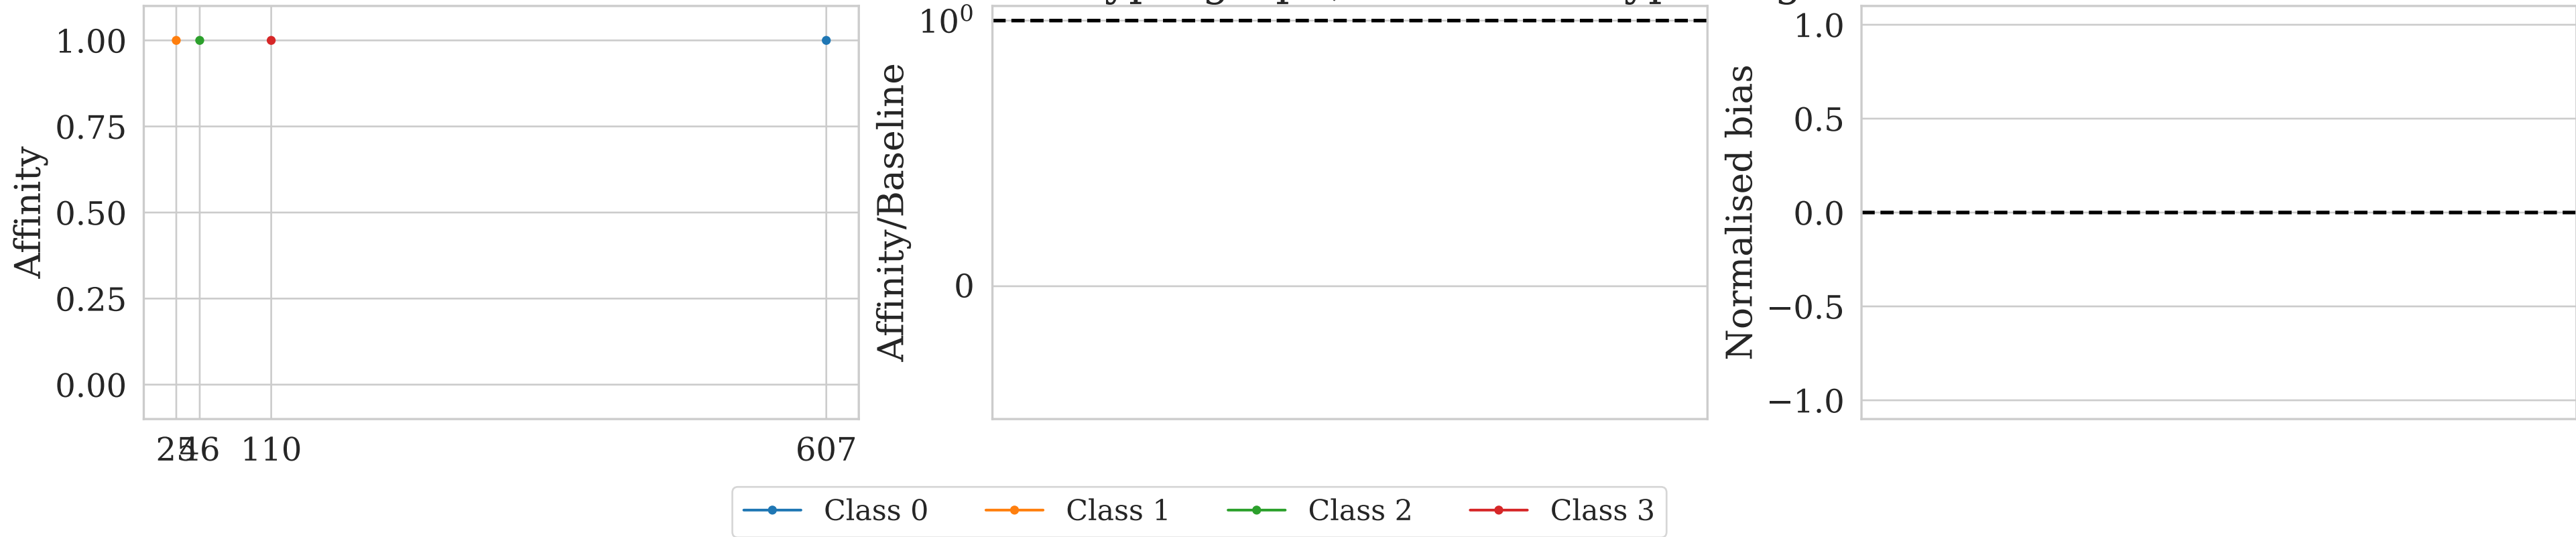

792-uniform hypergraph, number of hyperedges: 1

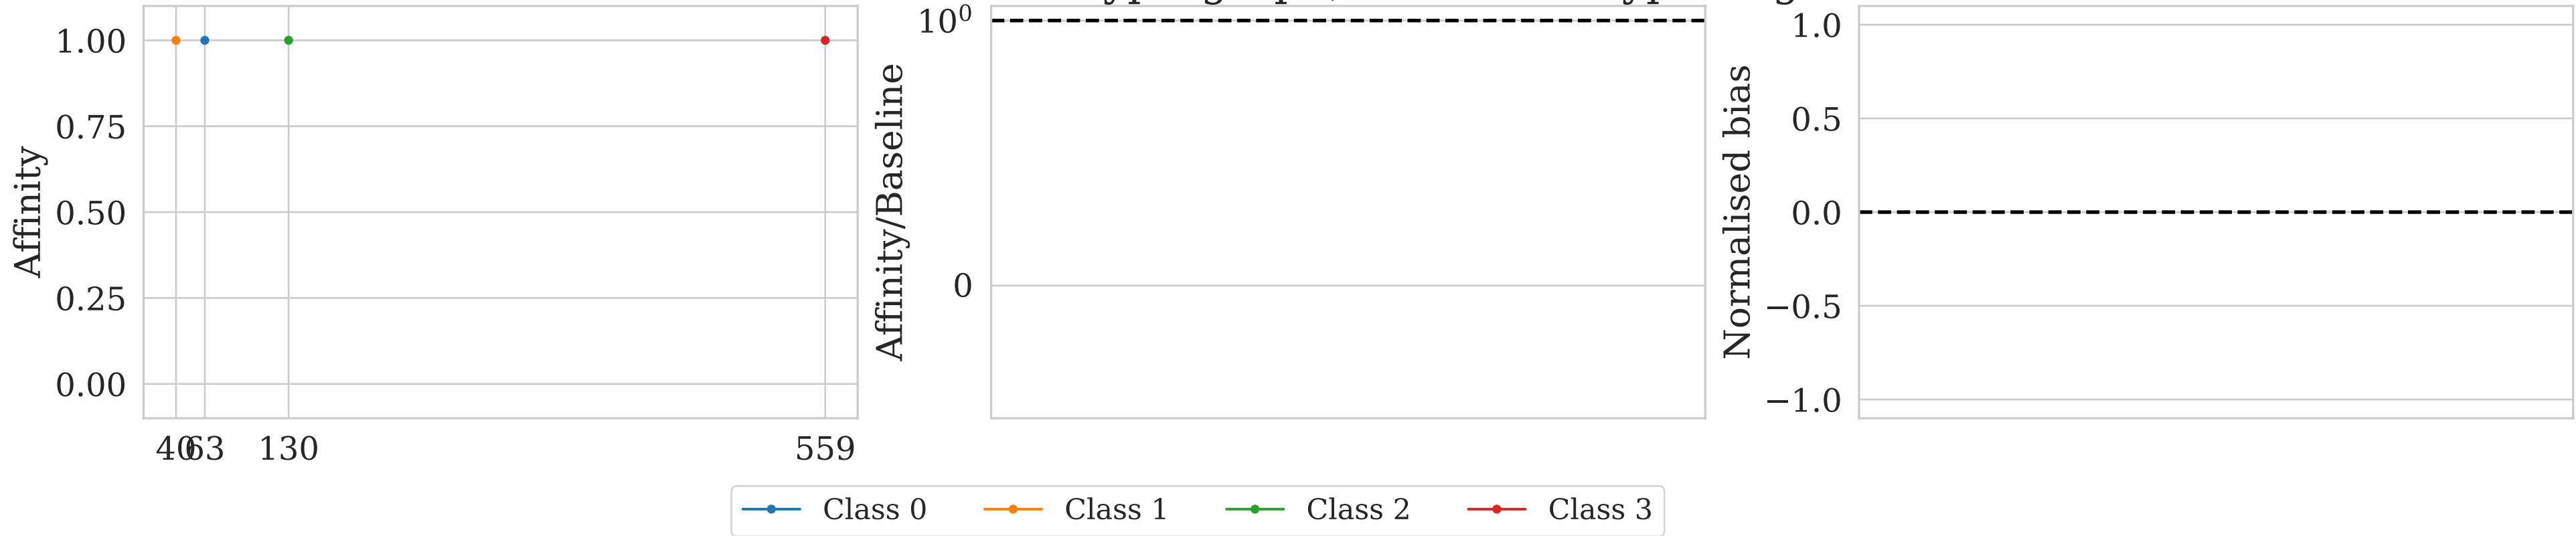



793-uniform hypergraph, number of hyperedges: 1

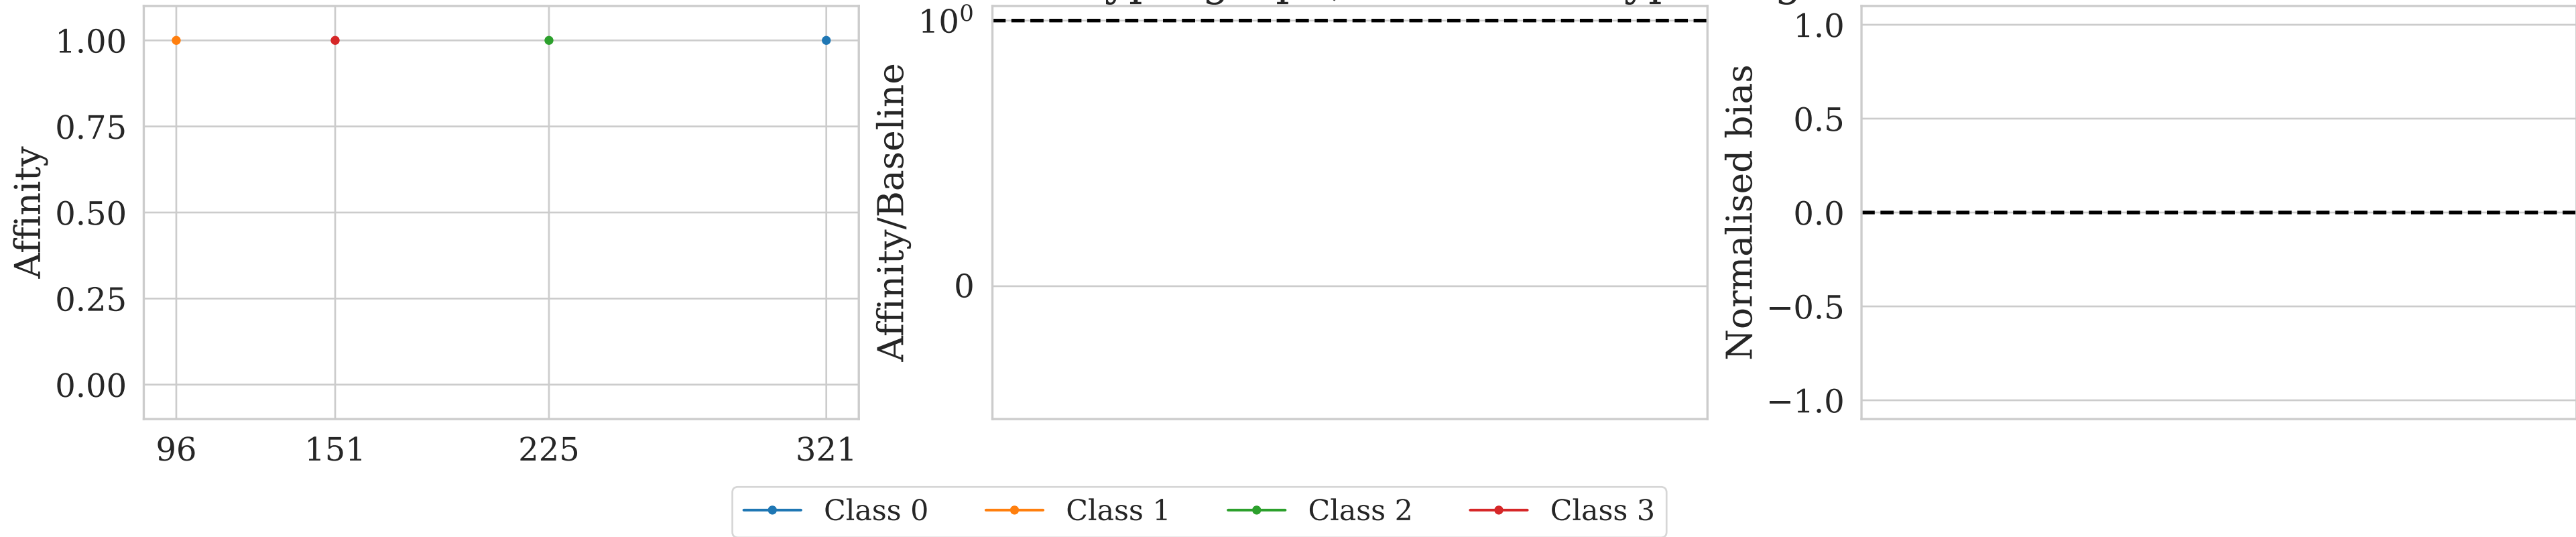

29-uniform hypergraph, number of hyperedges: 1

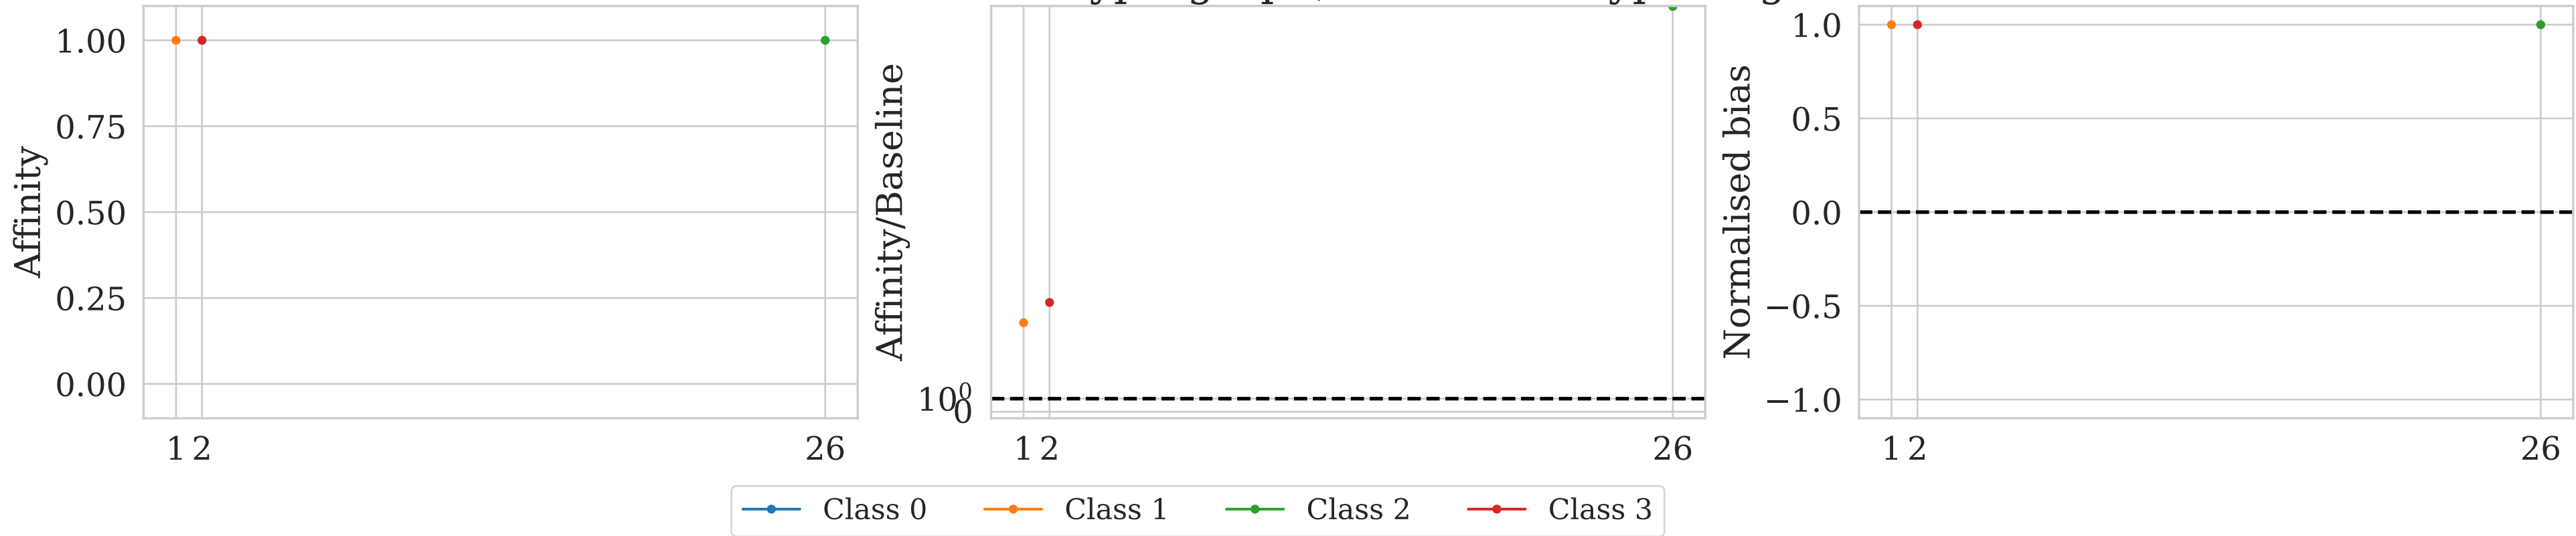

Supplement: supplementary_material [file attachment]
