# Supplementary material
Source: ML conference proceedings conference paper supplement (https://openreview.net/forum?id=YPpkFqMX6V)

2-uniform hypergraph, number of hyperedges: 541

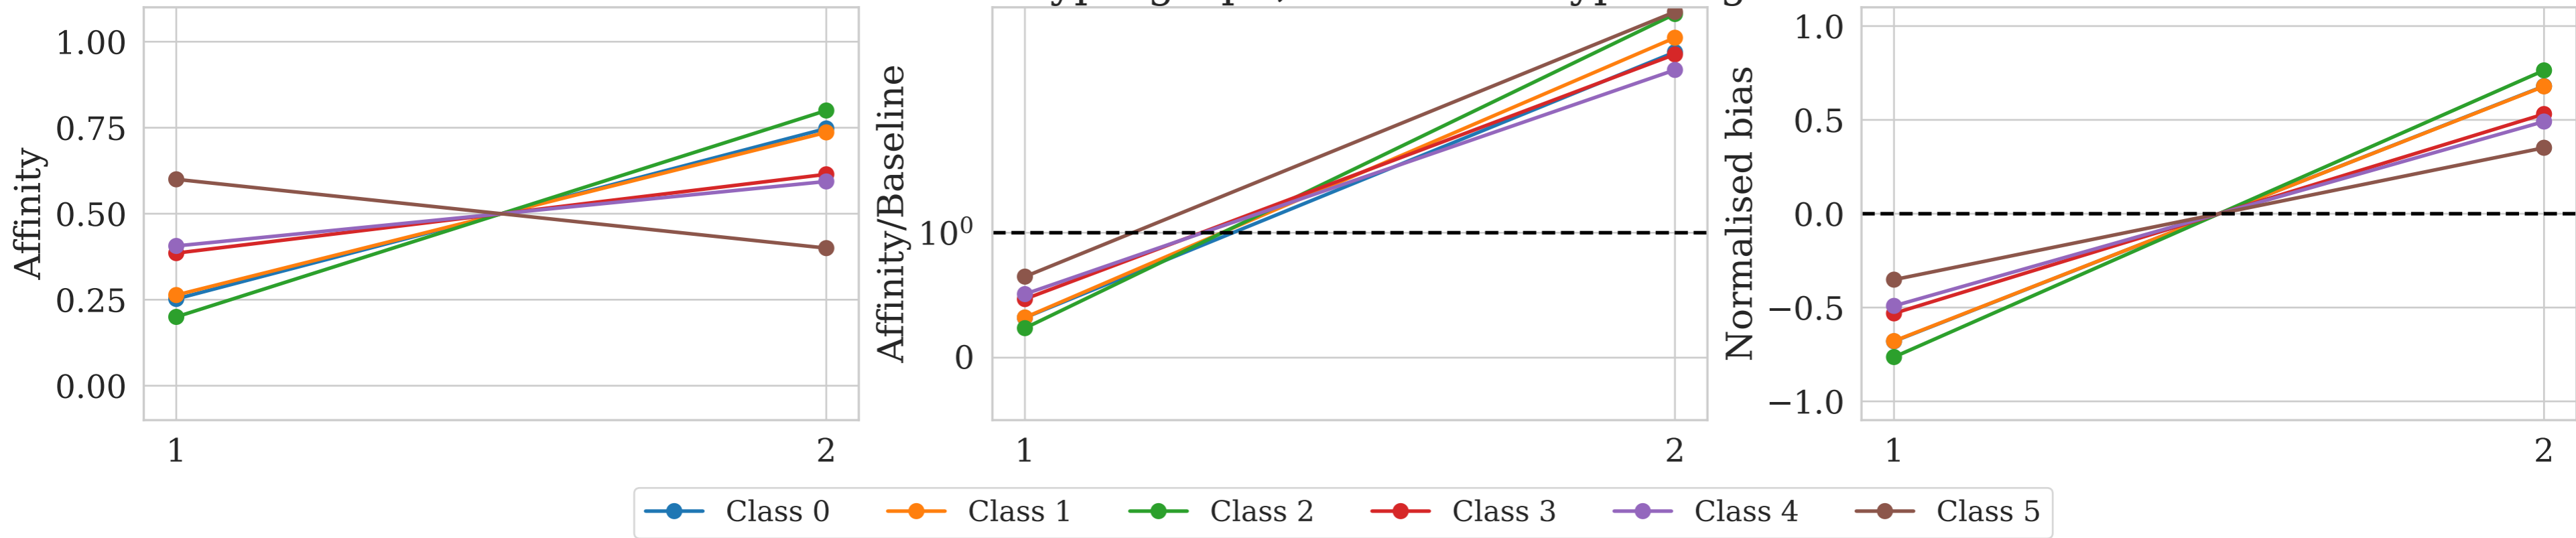

3-uniform hypergraph, number of hyperedges: 254

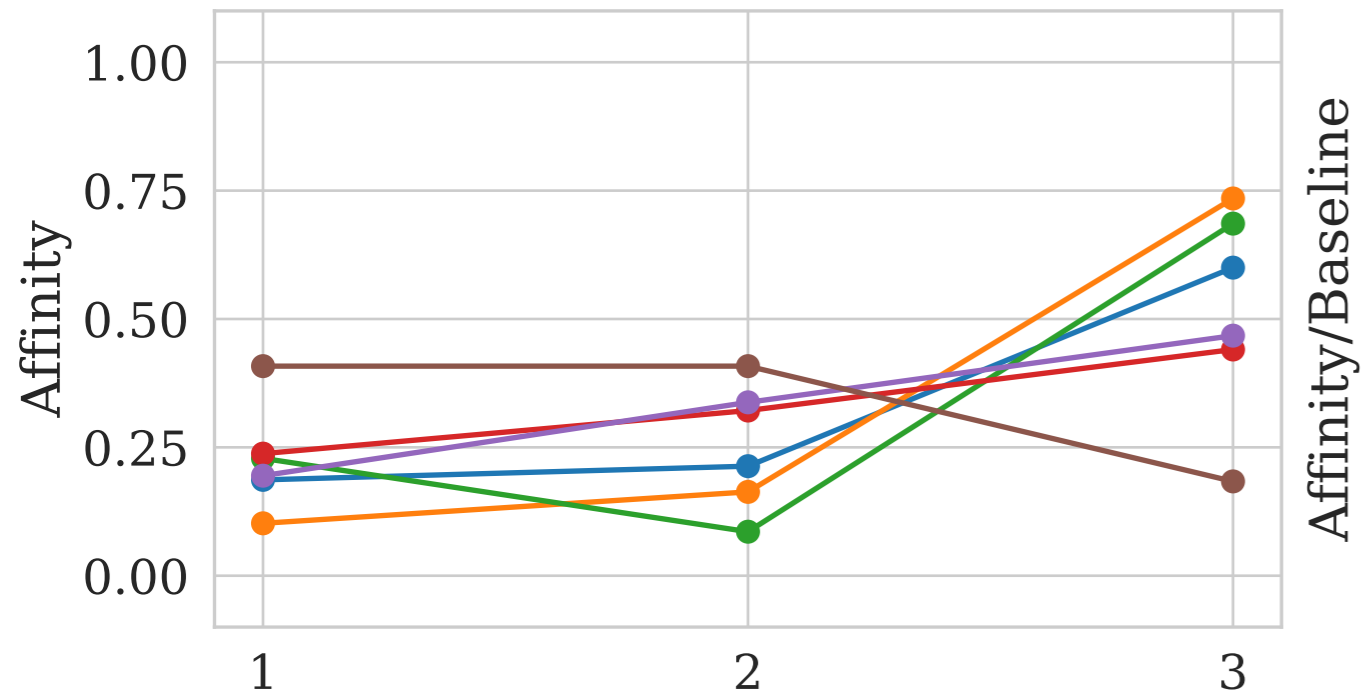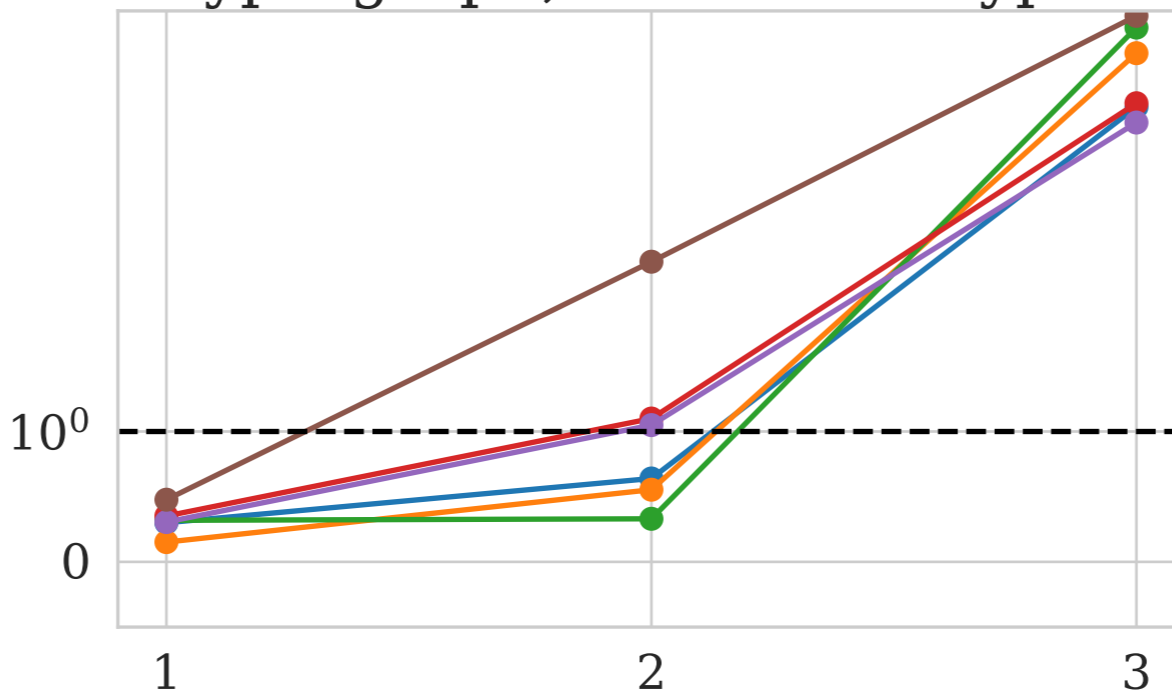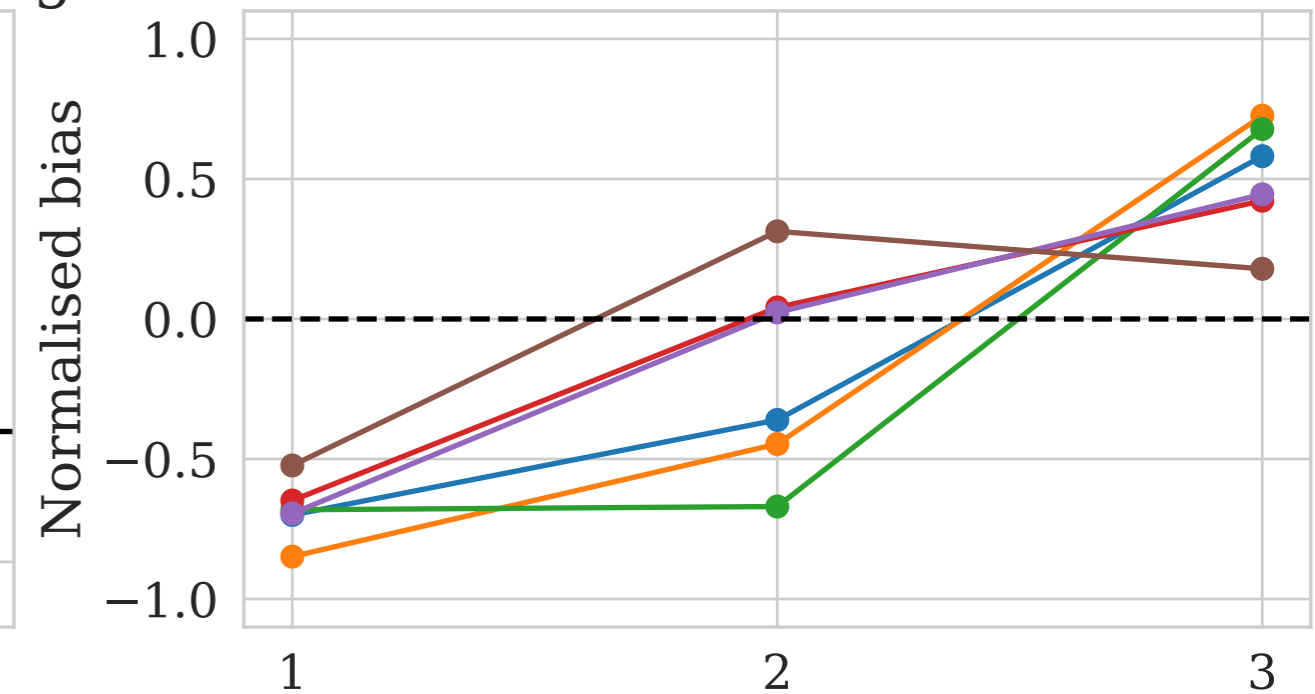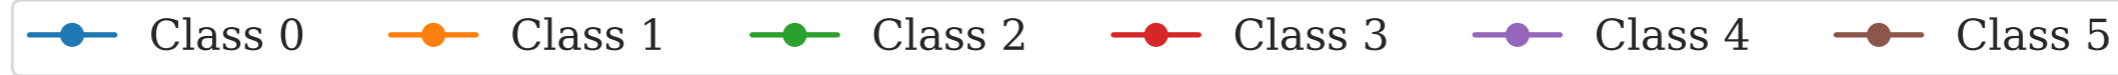

4-uniform hypergraph, number of hyperedges: 118

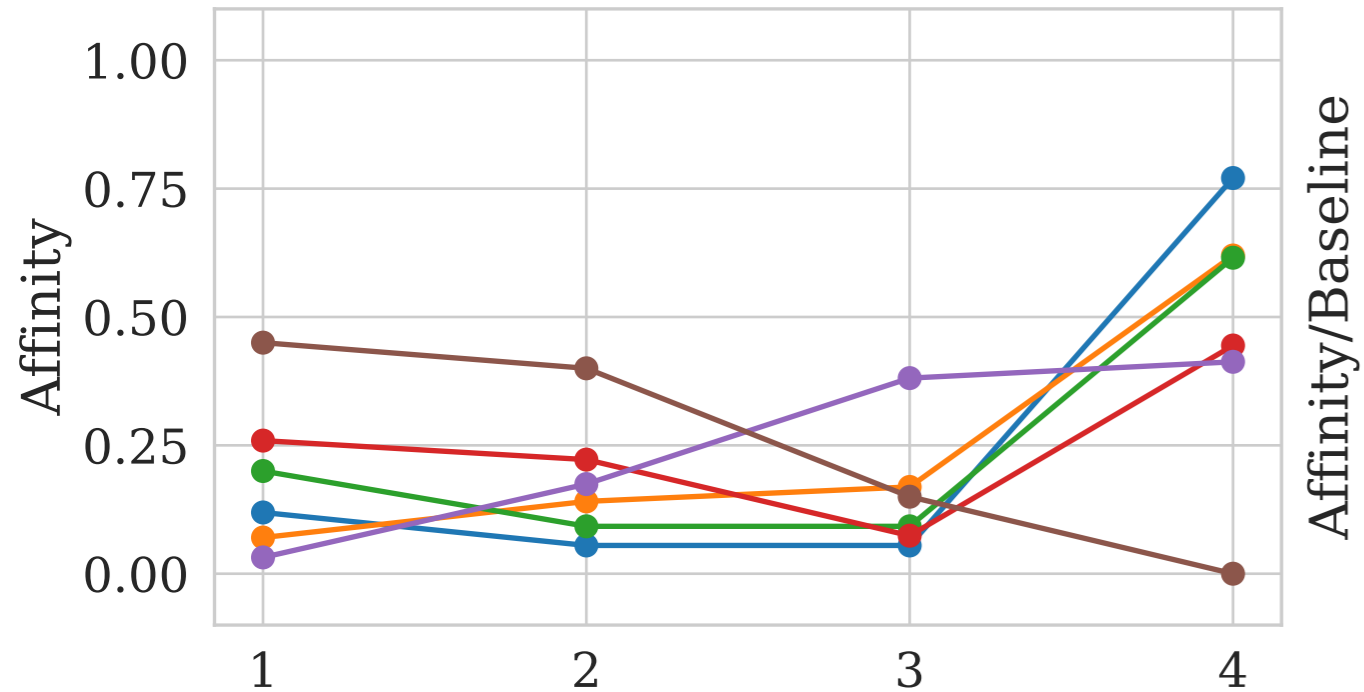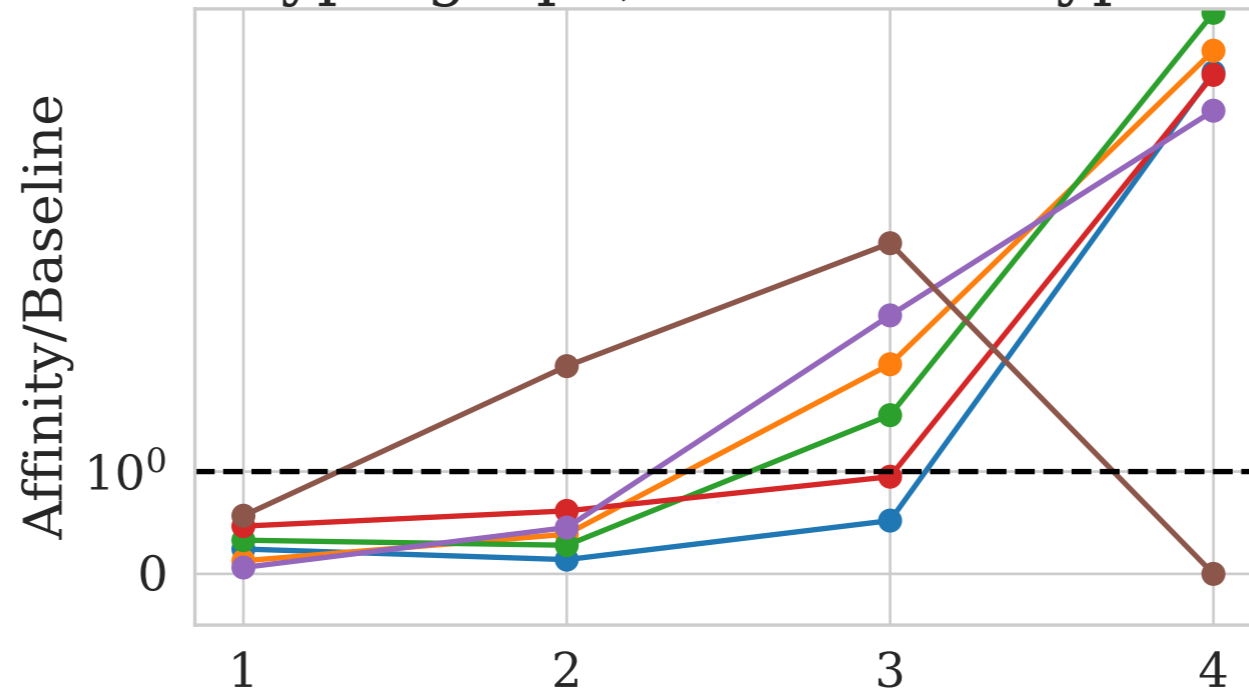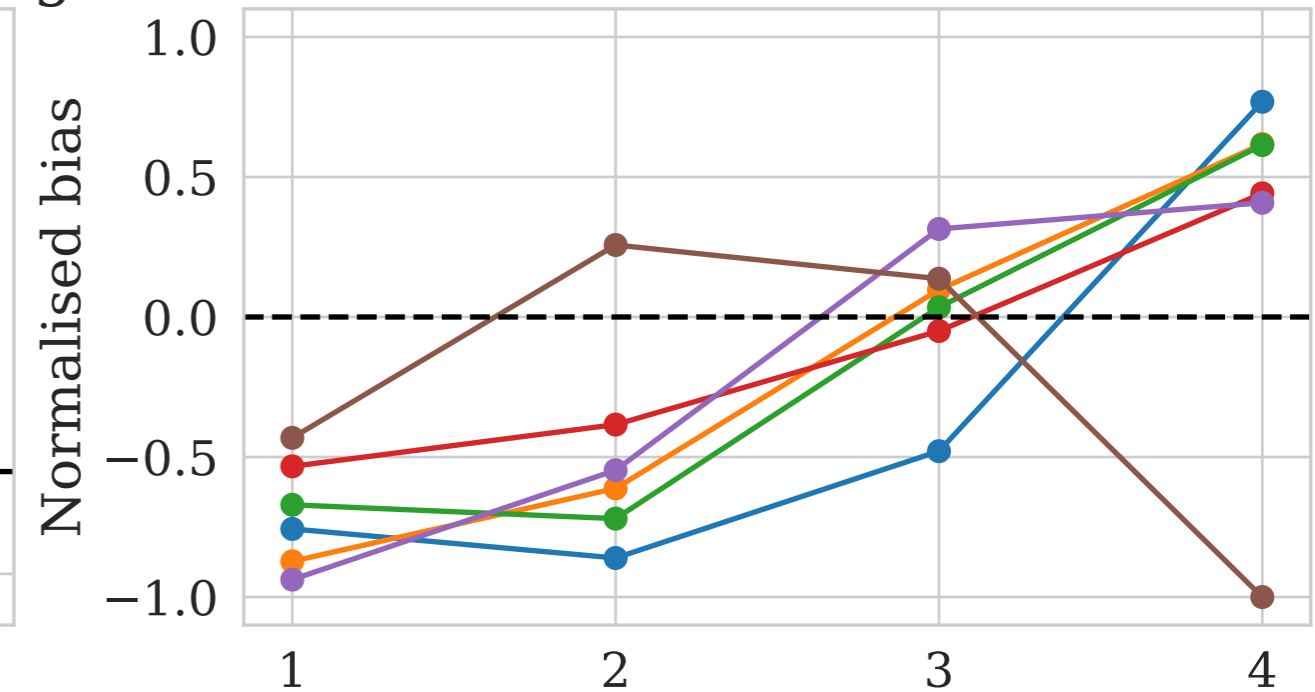

Class 0 Class 1 Class 2 Class 3 Class 4 Class 5

5-uniform hypergraph, number of hyperedges: 65

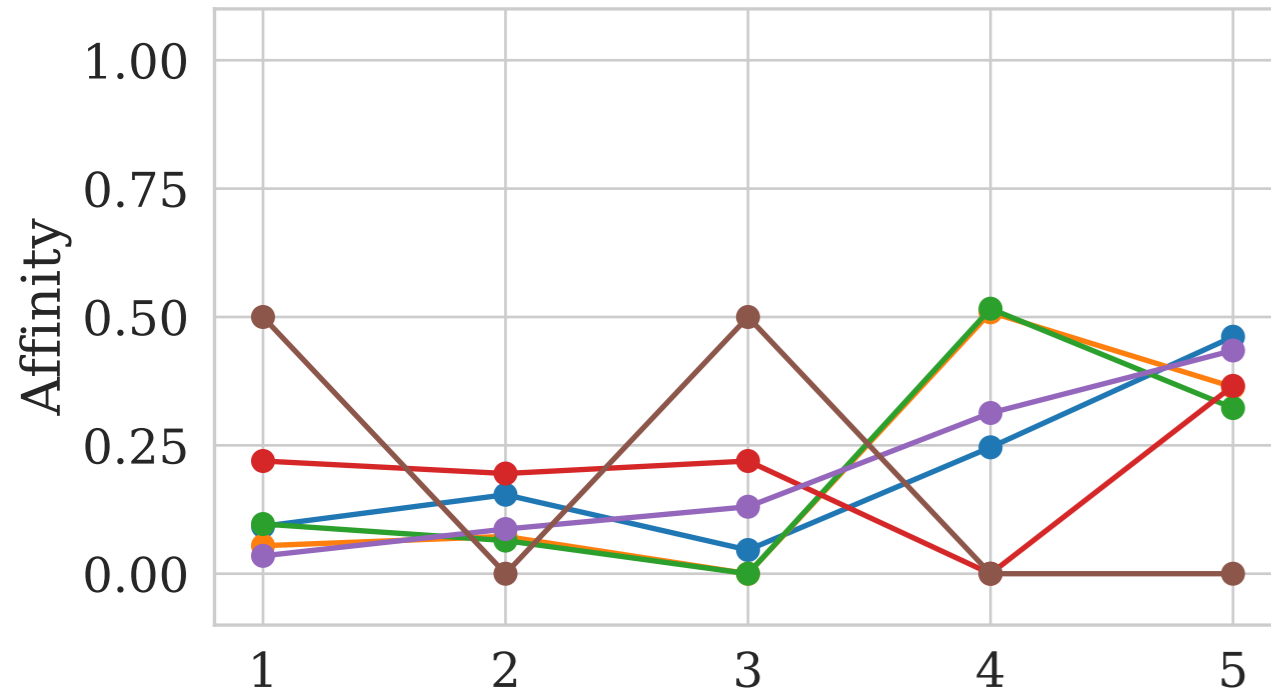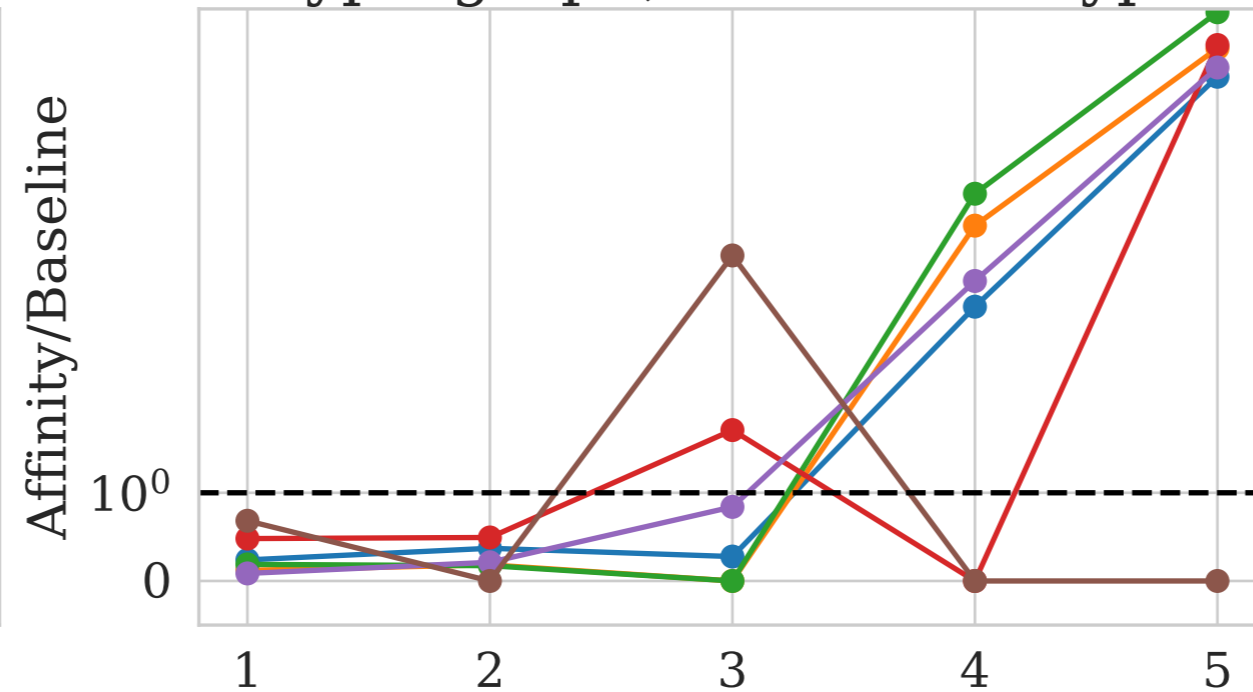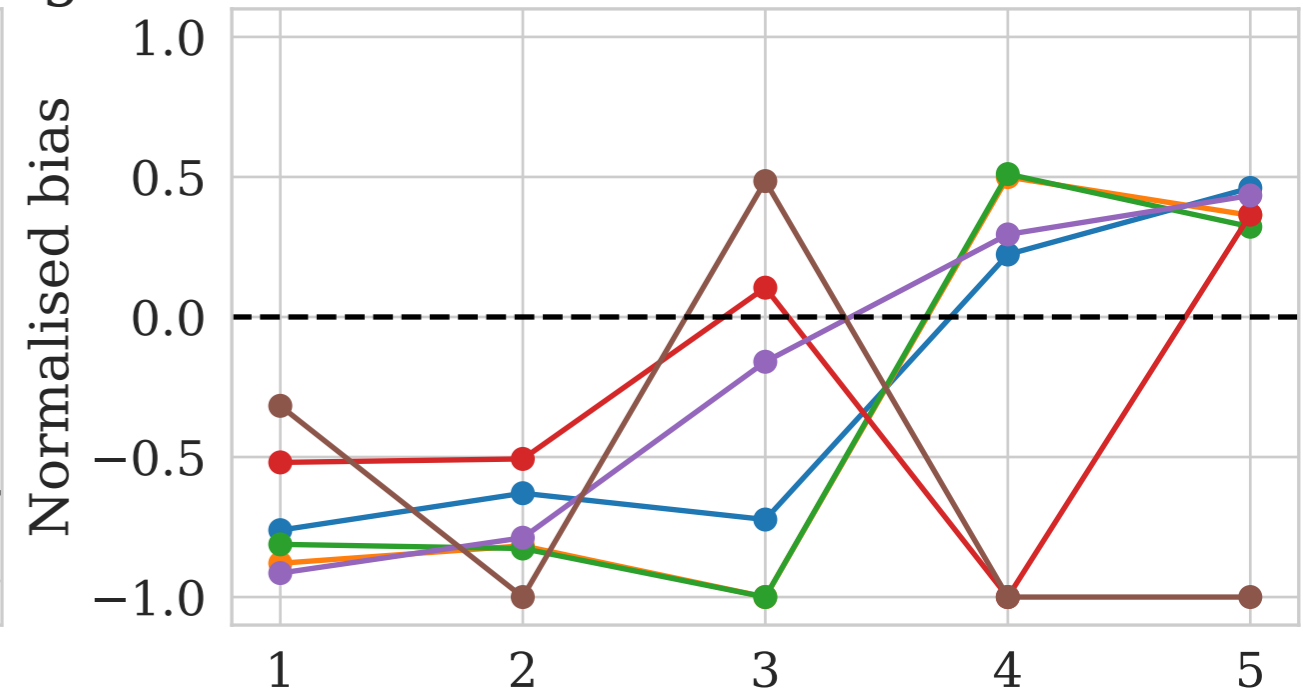

Class 0 Class 1 Class 2 Class 3 Class 4 Class 5

6-uniform hypergraph, number of hyperedges: 40

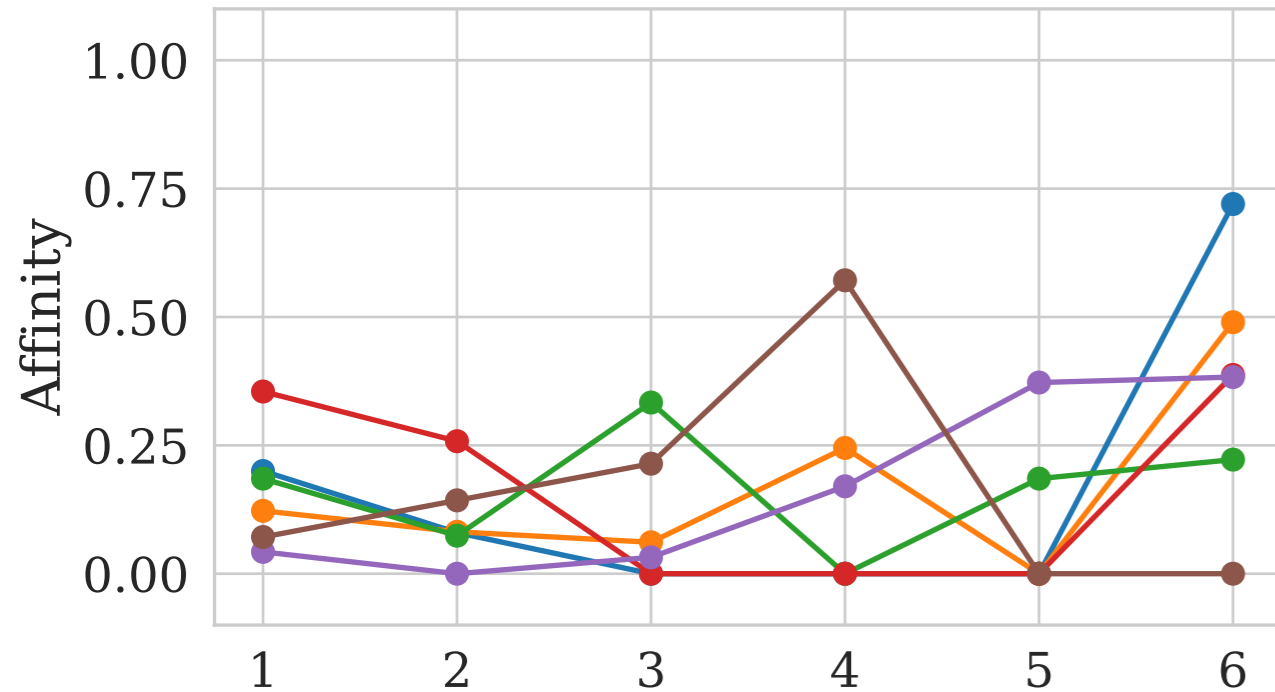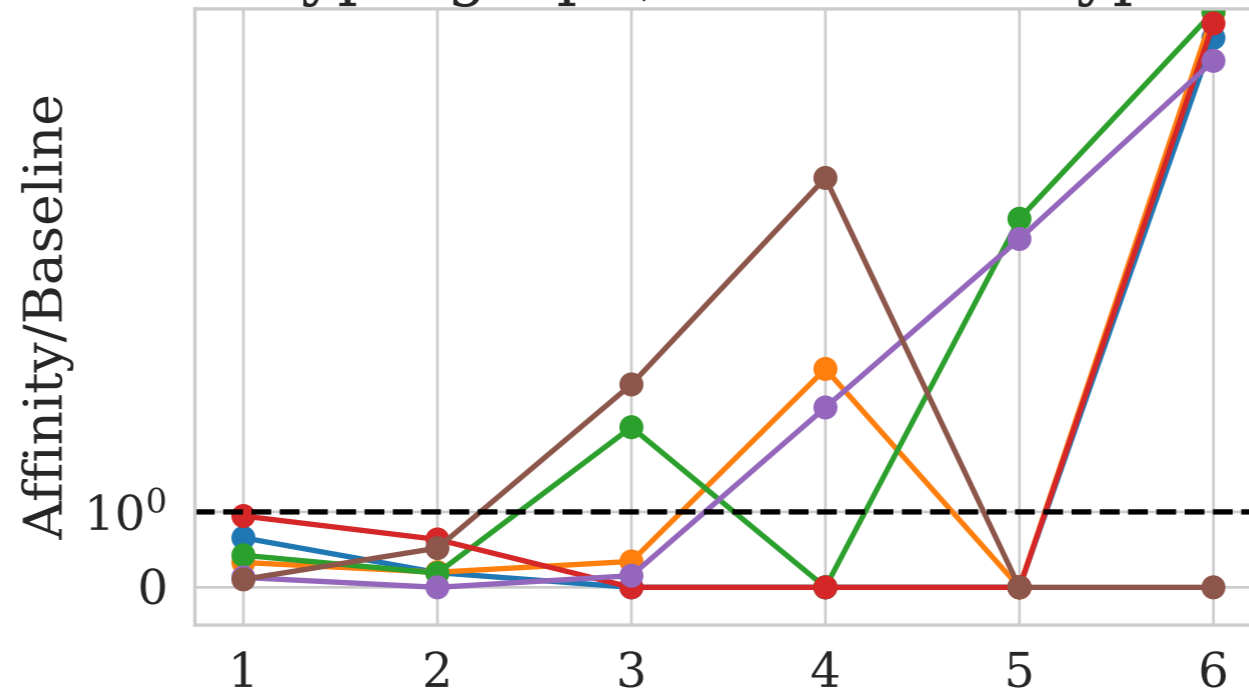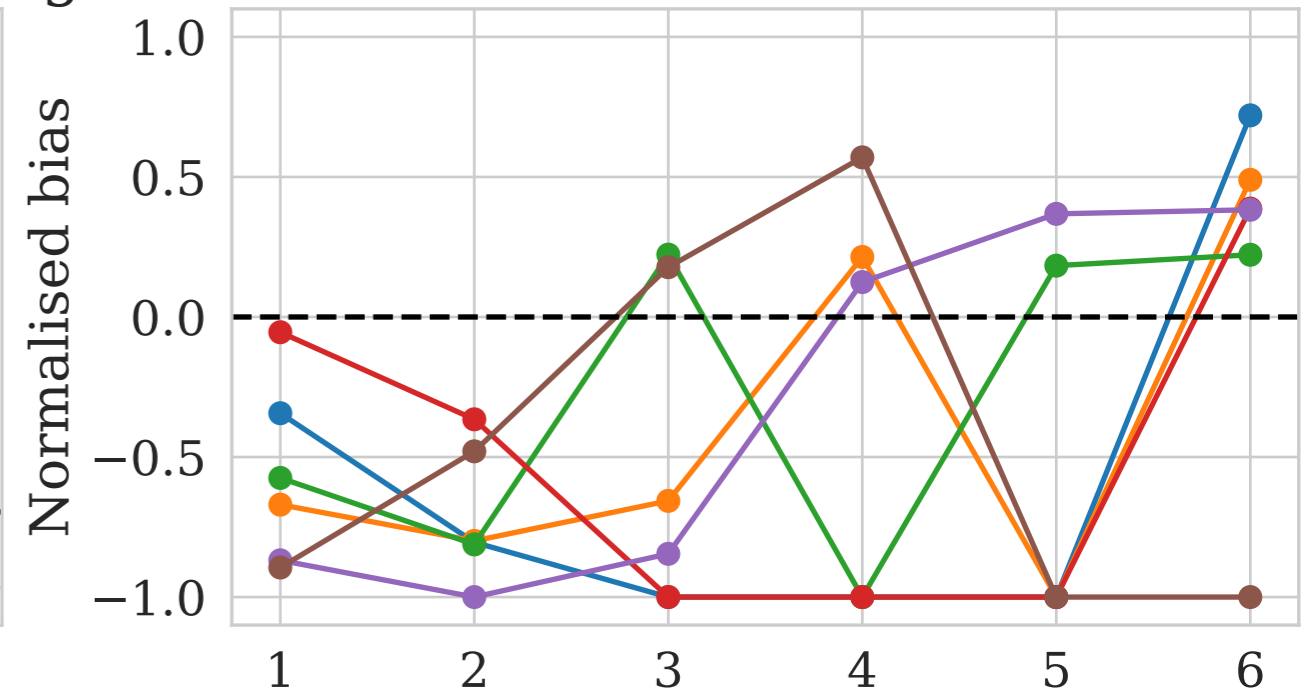

Class 0 Class 1 Class 2 Class 3 Class 4 Class 5

7-uniform hypergraph, number of hyperedges: 23

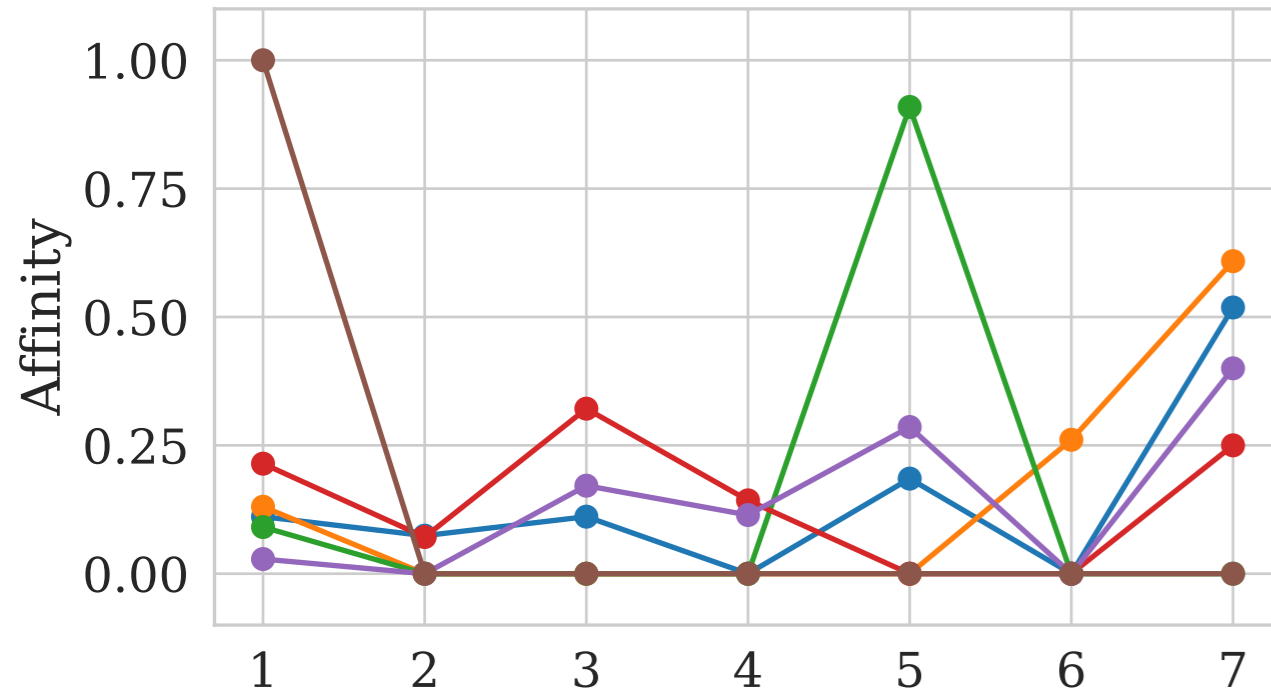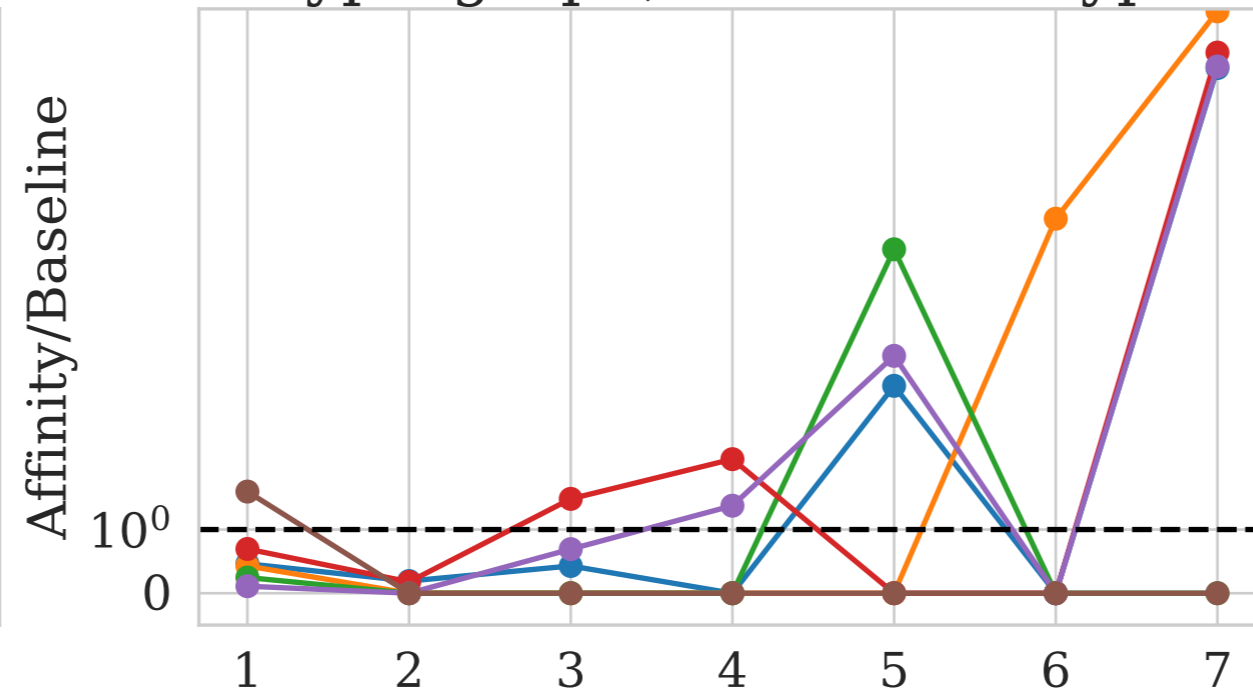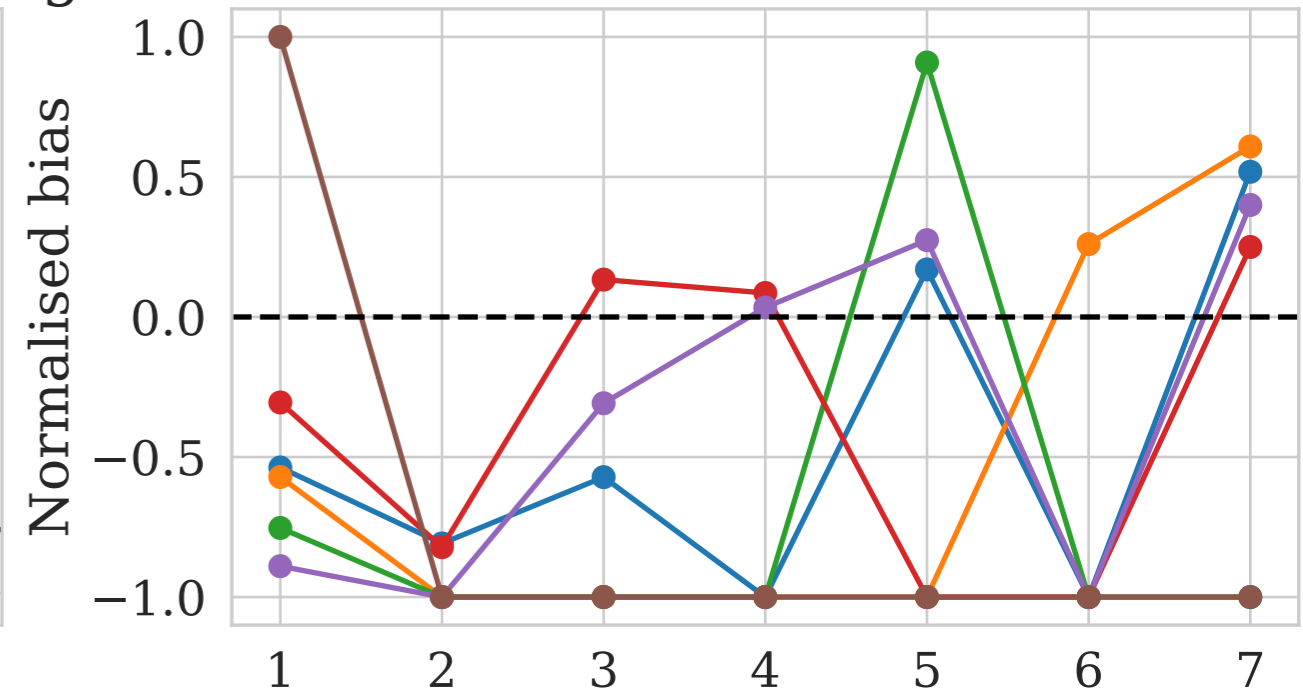

Class 0 Class 1 Class 2 Class 3 Class 4 Class 5

8-uniform hypergraph, number of hyperedges: 10

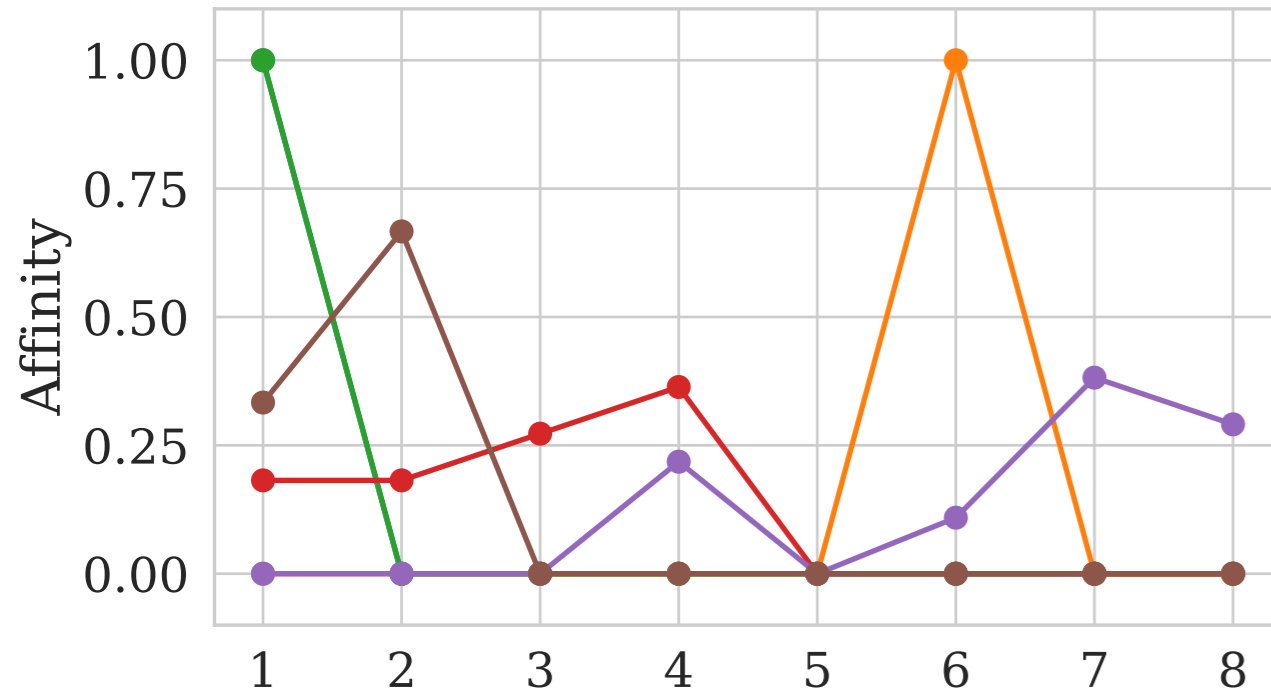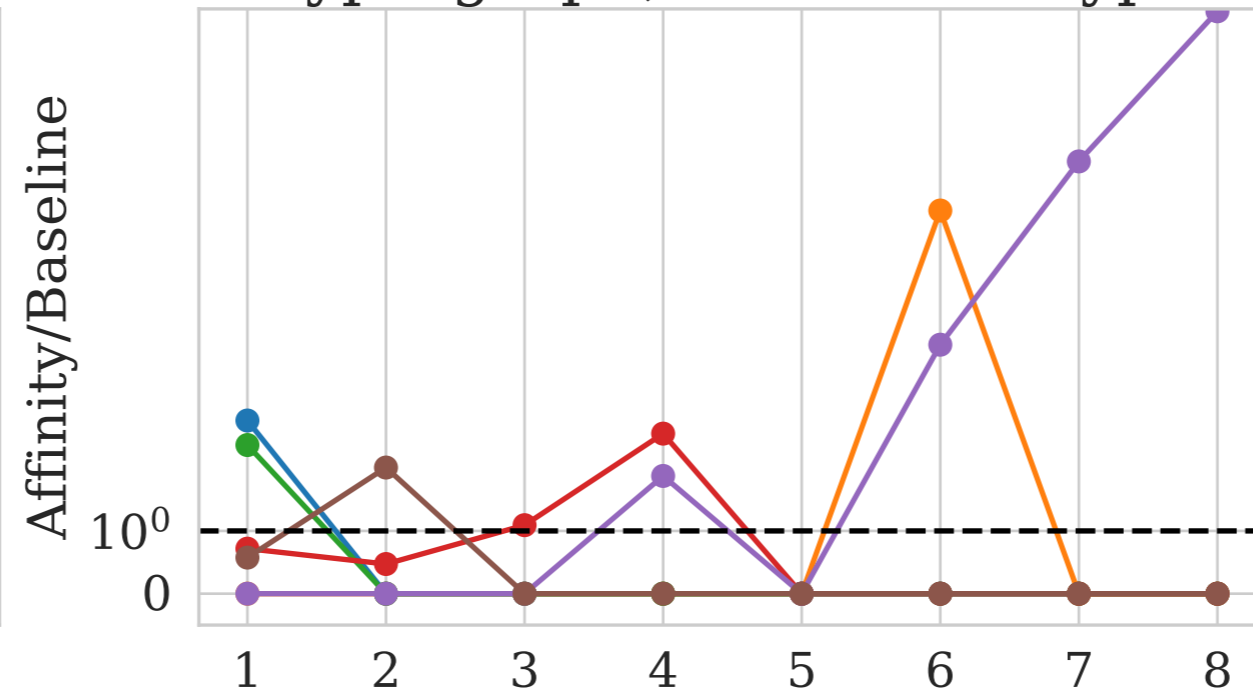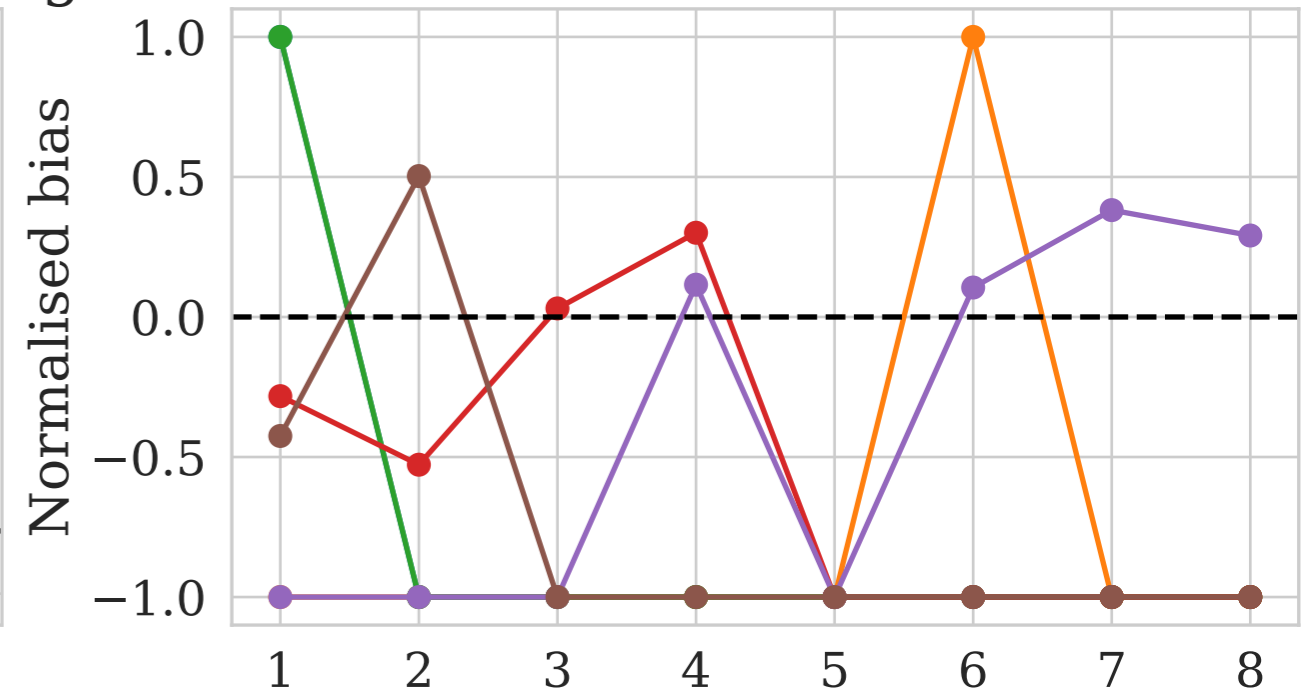

● Class 0   
 ● Class 1   
 ● Class 2   
 ● Class 3   
 ● Class 4   
 ● Class 5

10-uniform hypergraph, number of hyperedges: 8

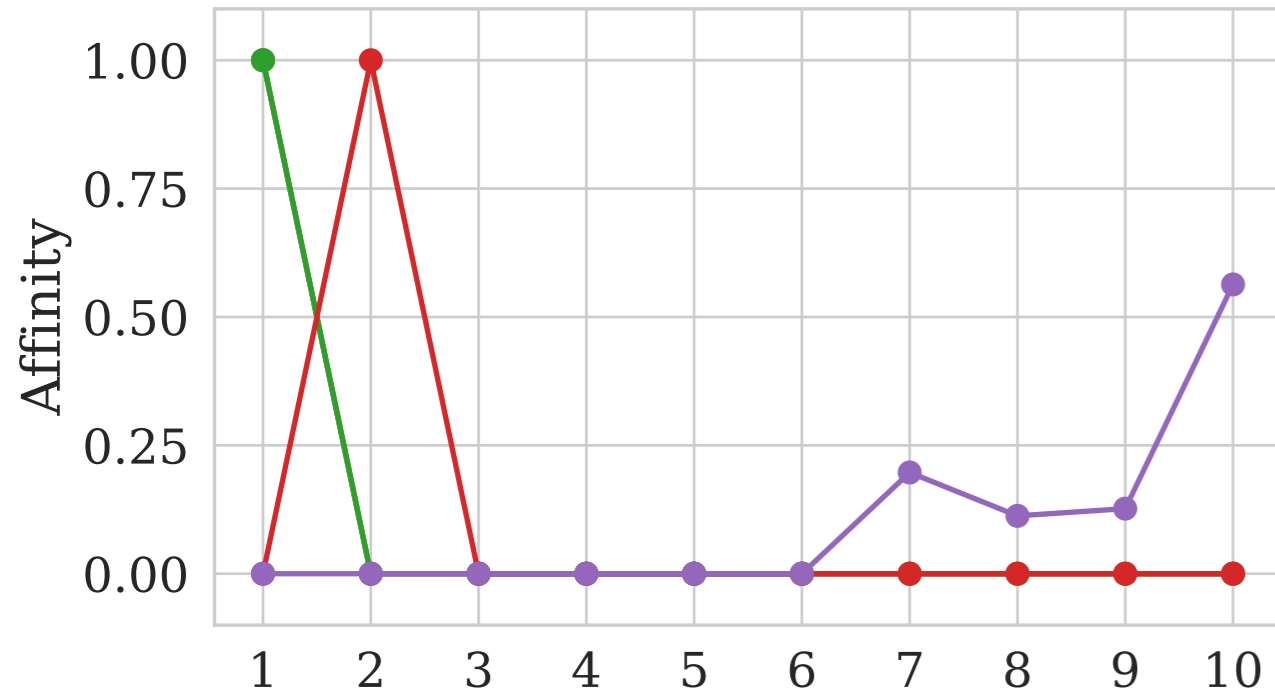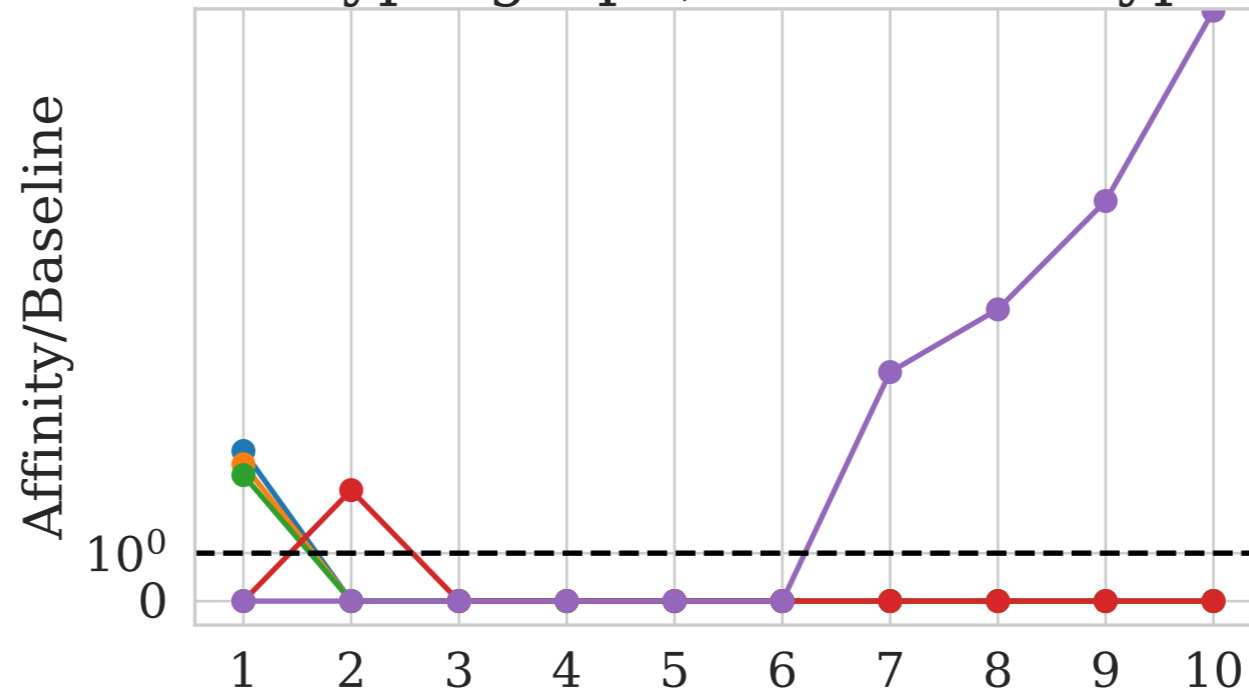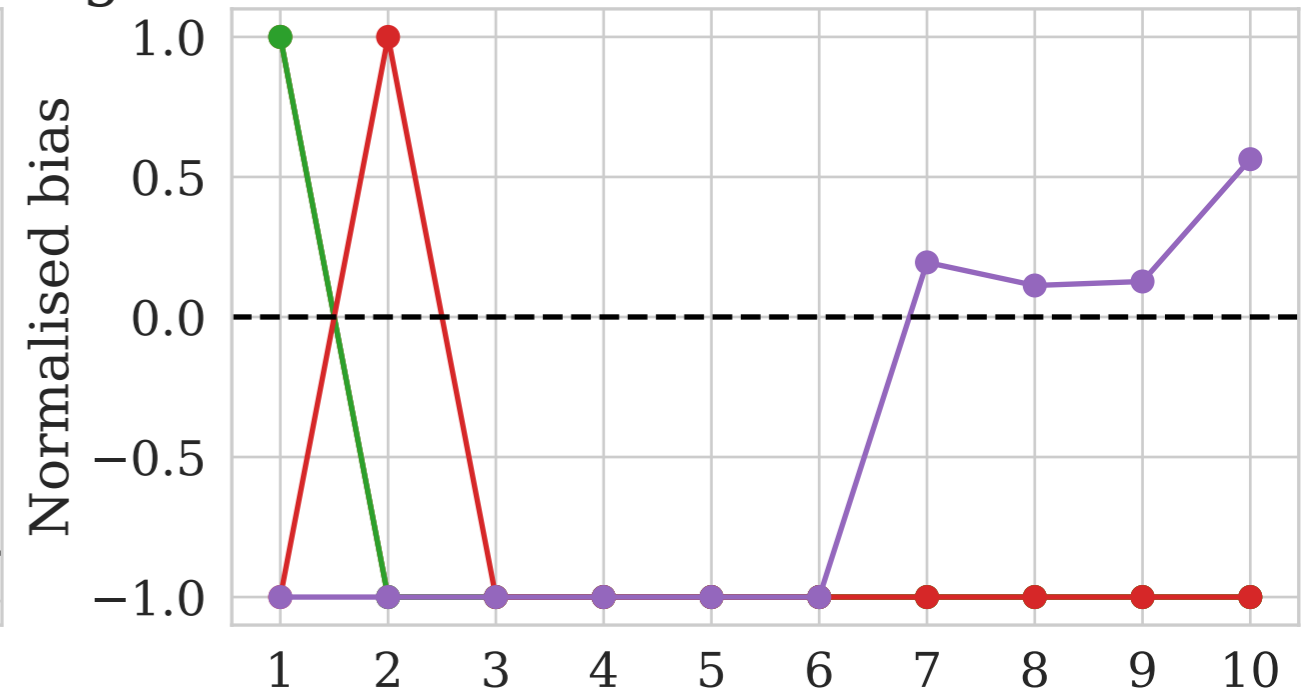

Class 0 Class 1 Class 2 Class 3 Class 4 Class 5

9-uniform hypergraph, number of hyperedges: 6

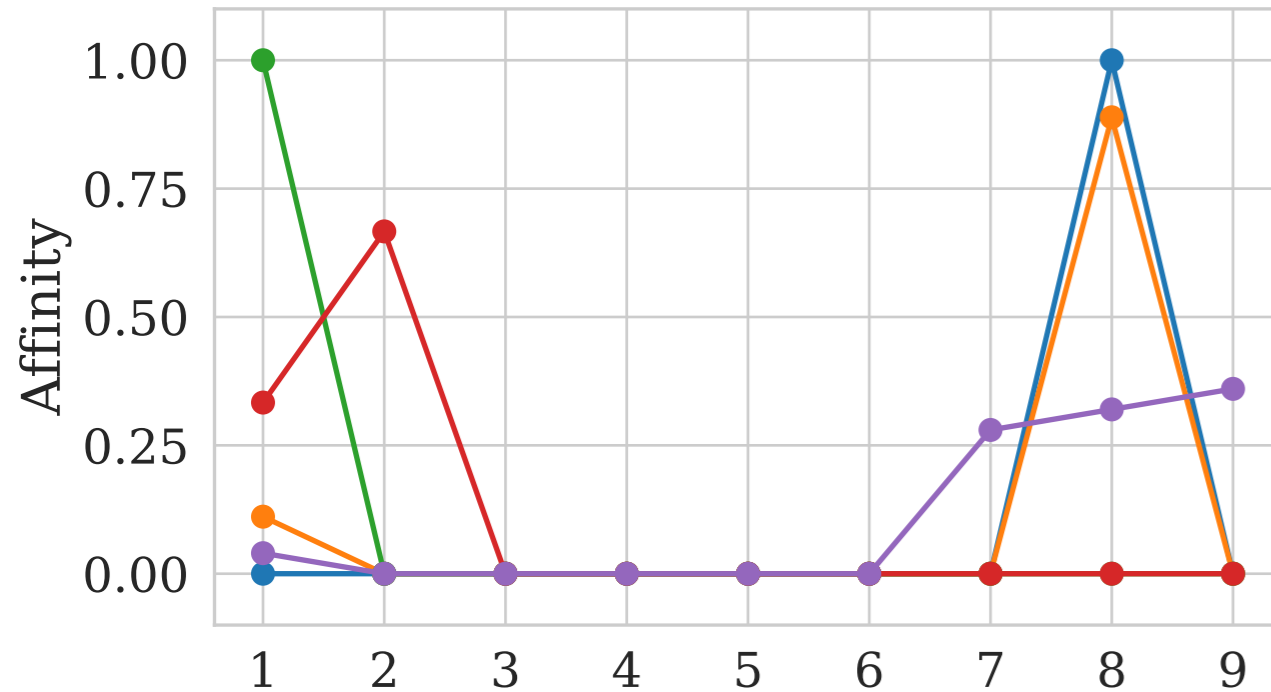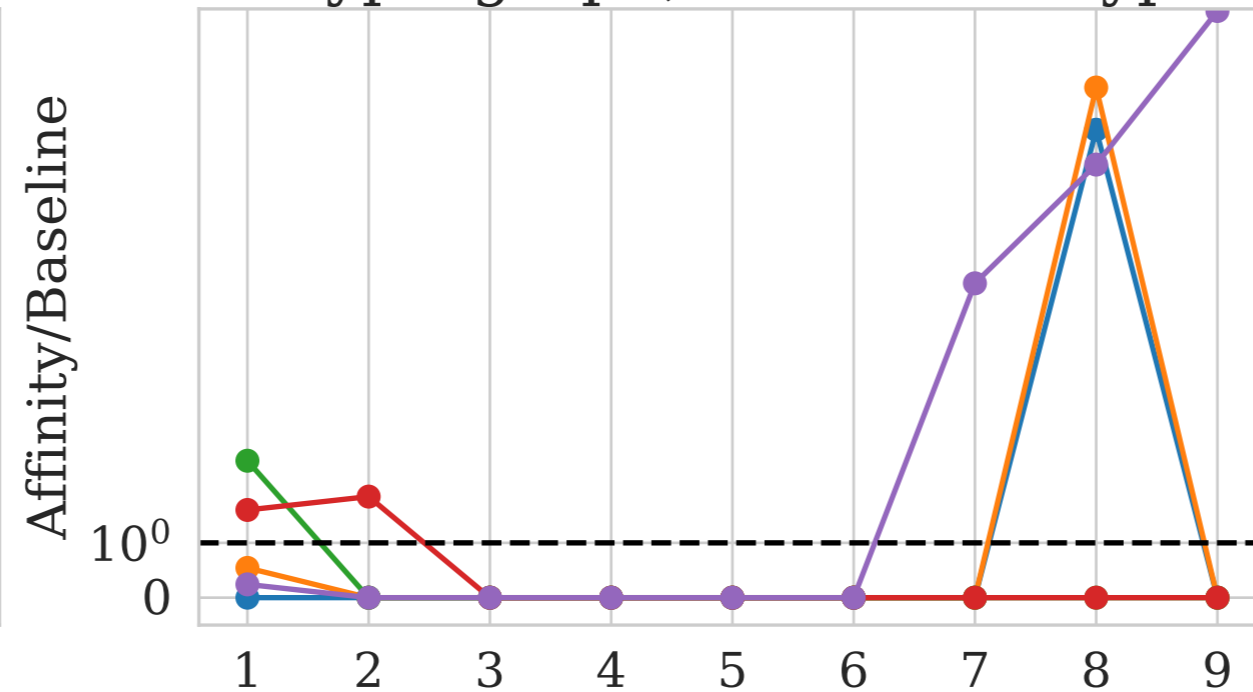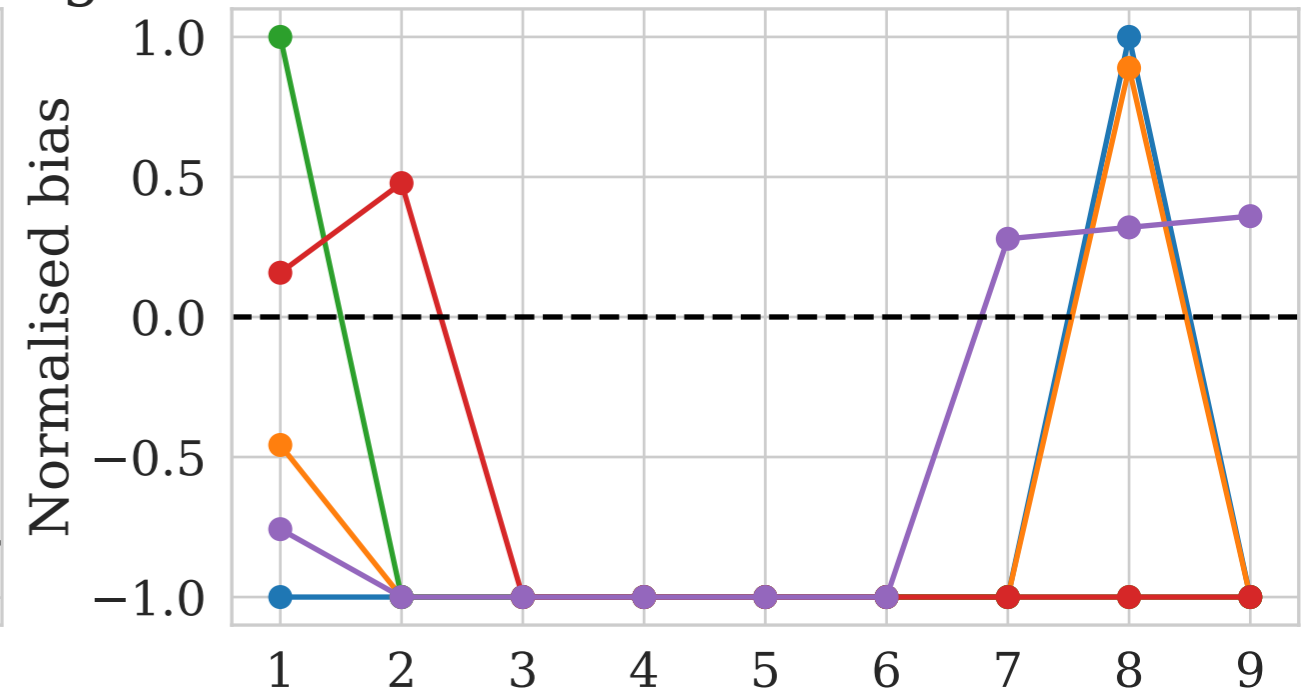

Class 0 Class 1 Class 2 Class 3 Class 4 Class 5

11-uniform hypergraph, number of hyperedges: 4

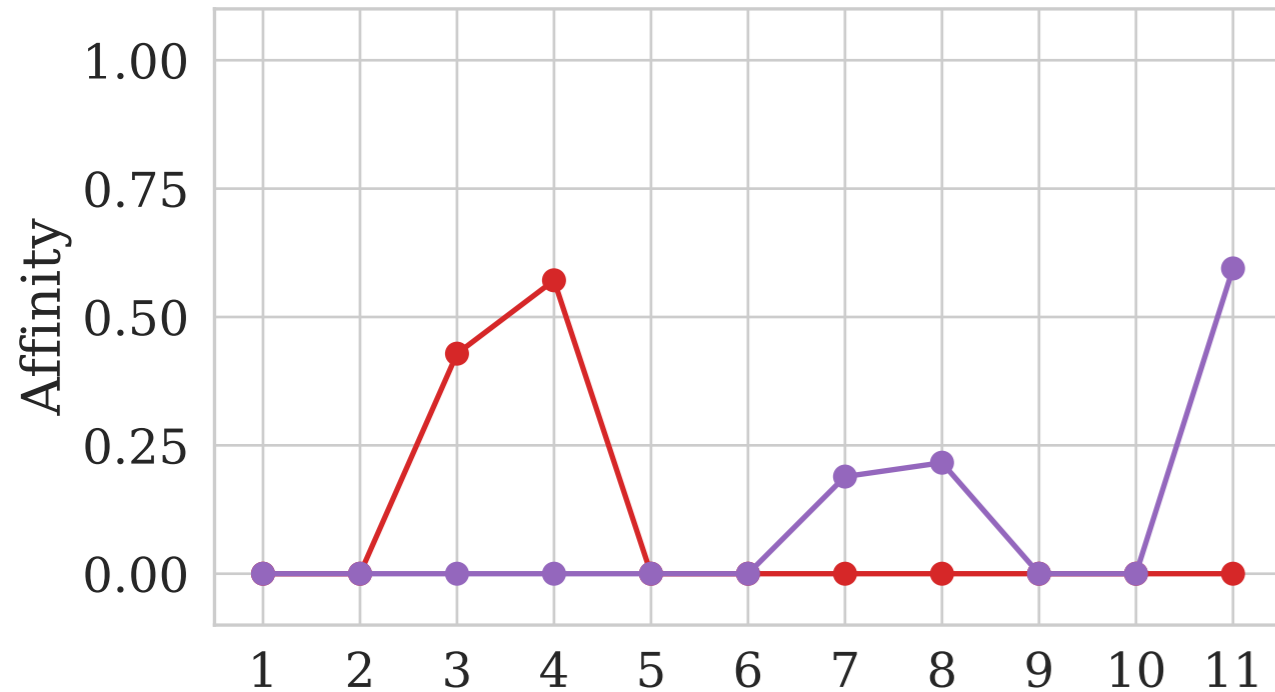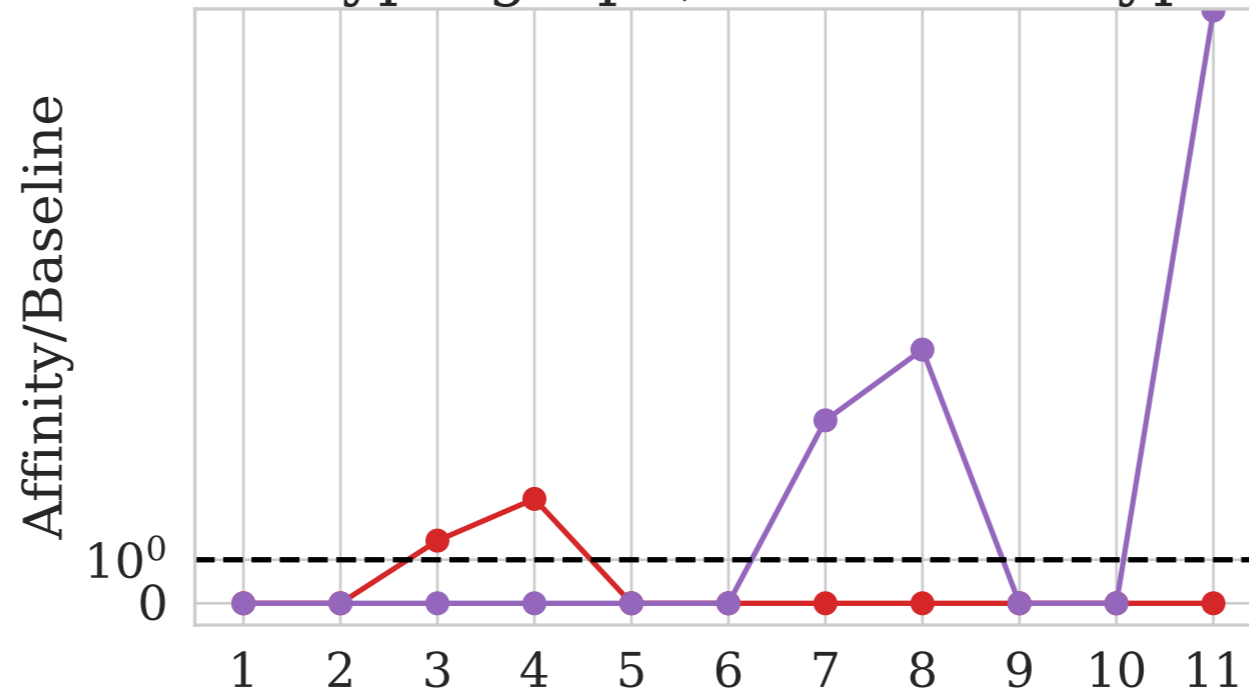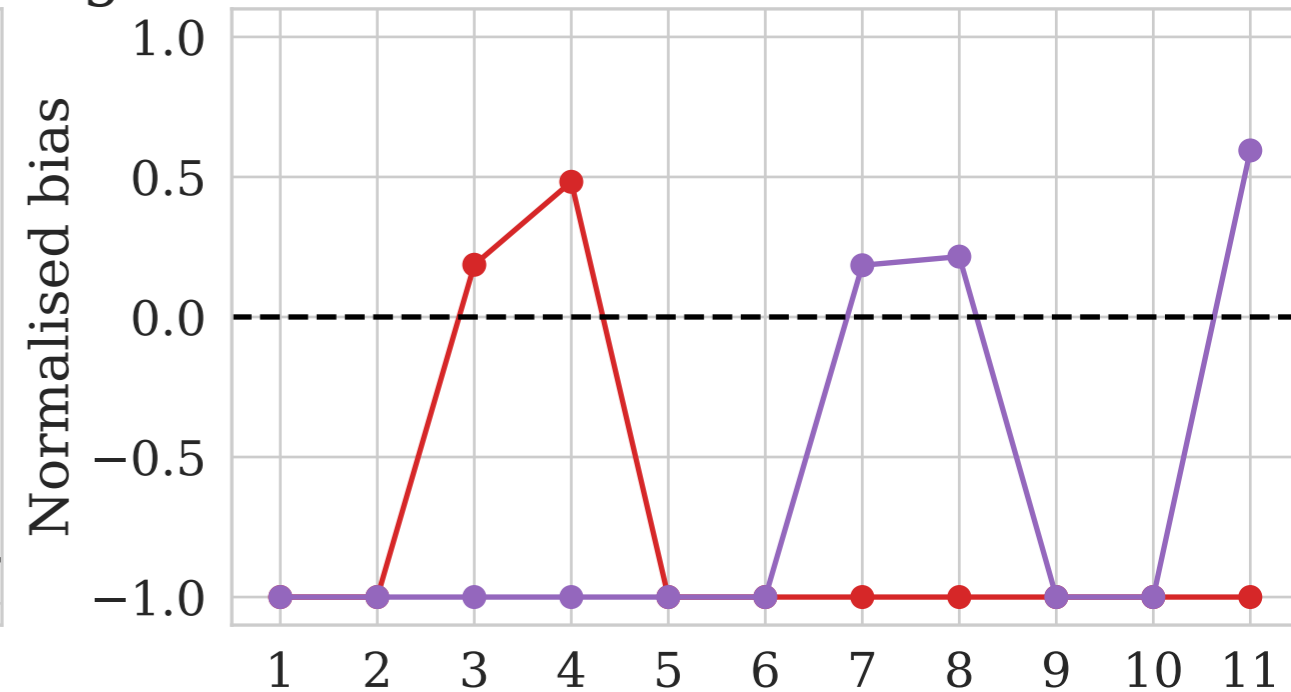

● Class 0   
 ● Class 1   
 ● Class 2   
 ● Class 3   
 ● Class 4   
 ● Class 5

12-uniform hypergraph, number of hyperedges: 4

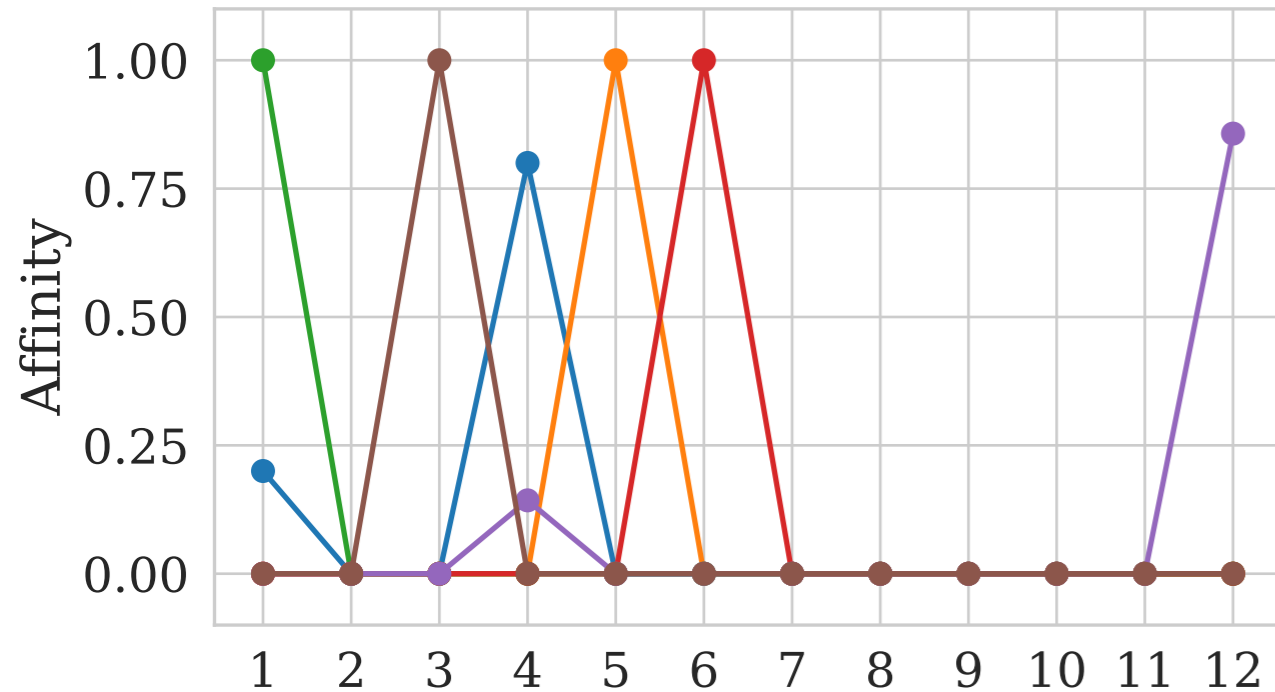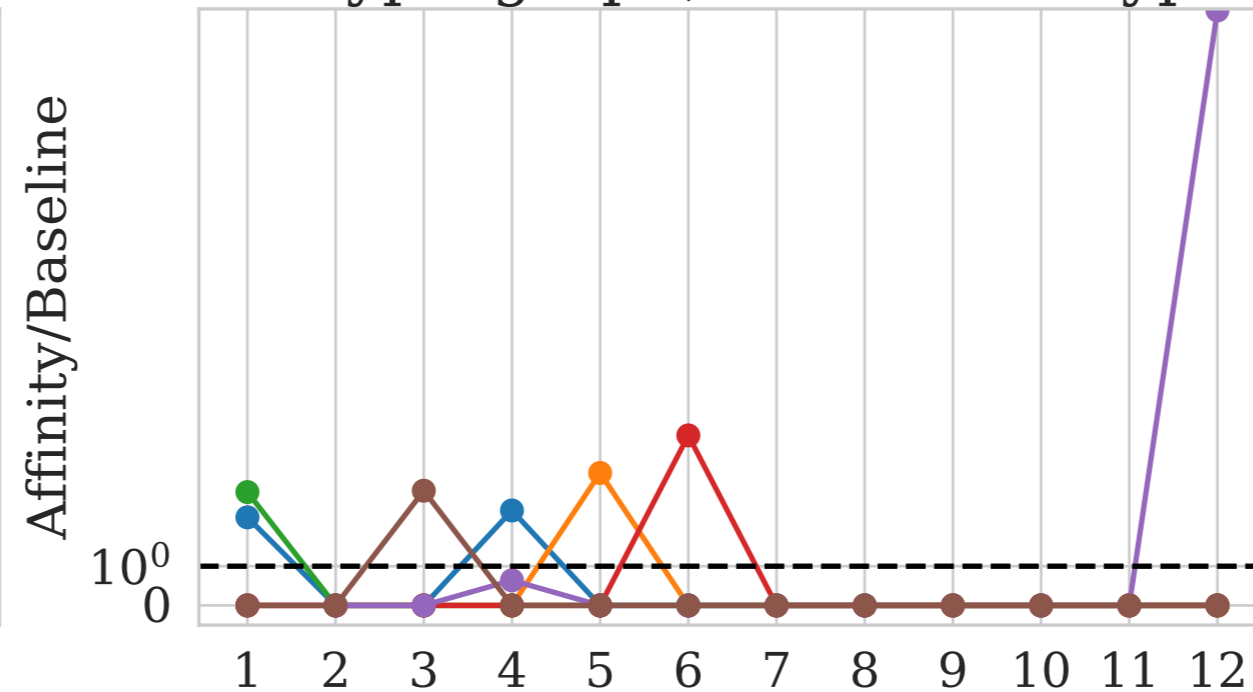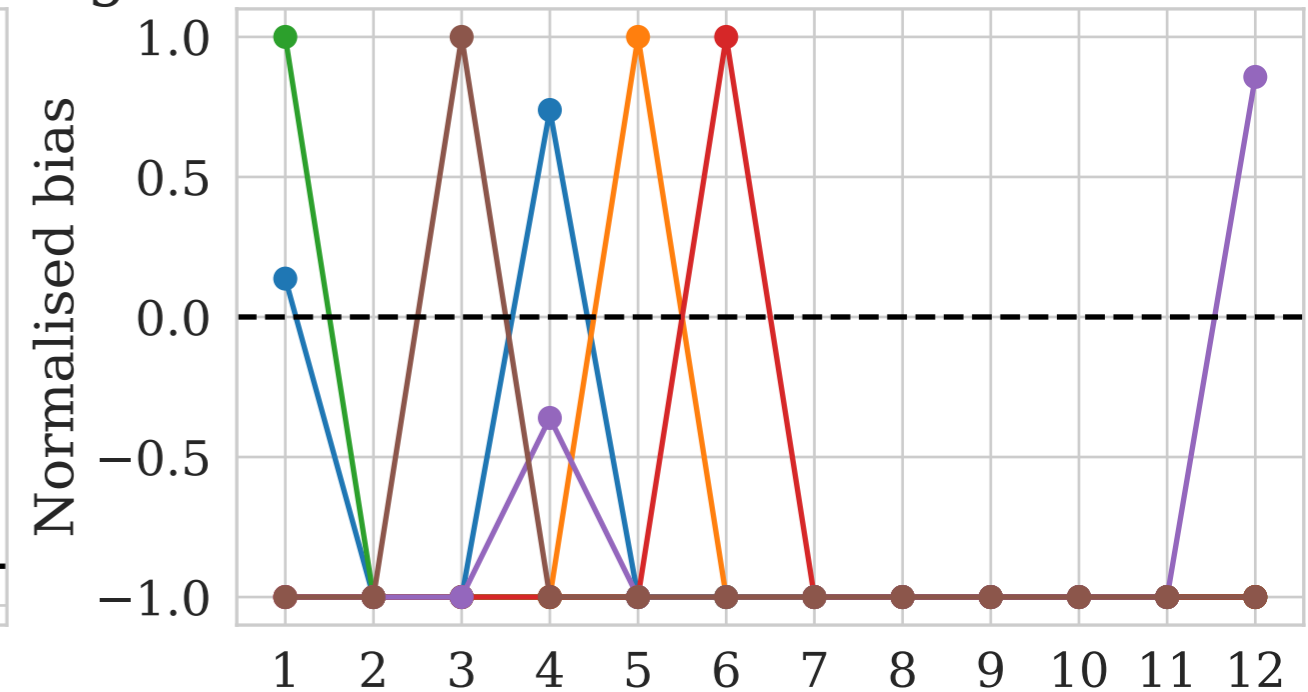

● Class 0   
 ● Class 1   
 ● Class 2   
 ● Class 3   
 ● Class 4   
 ● Class 5

19-uniform hypergraph, number of hyperedges: 1

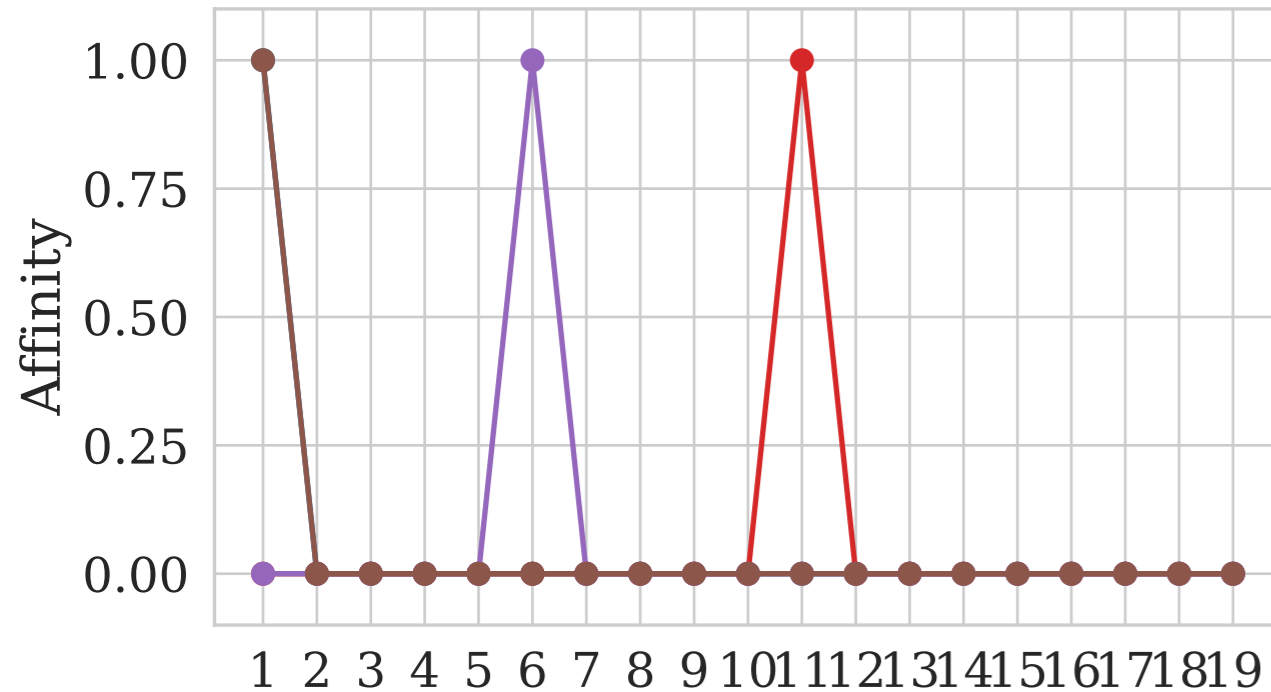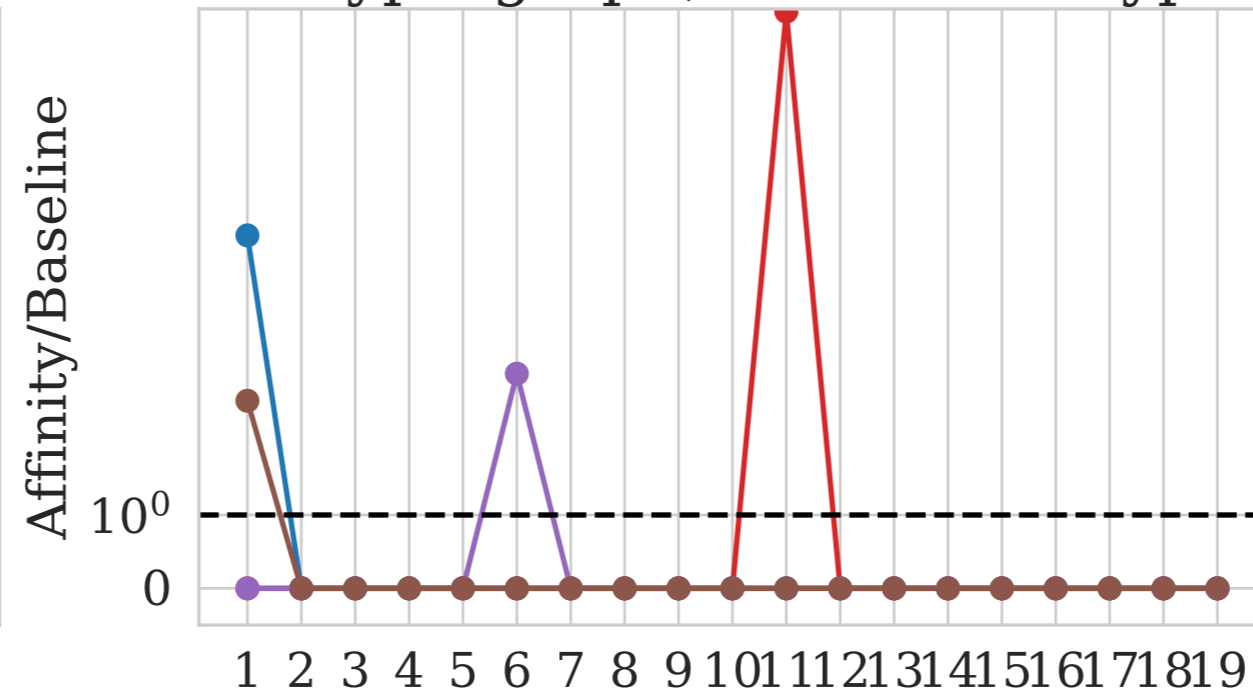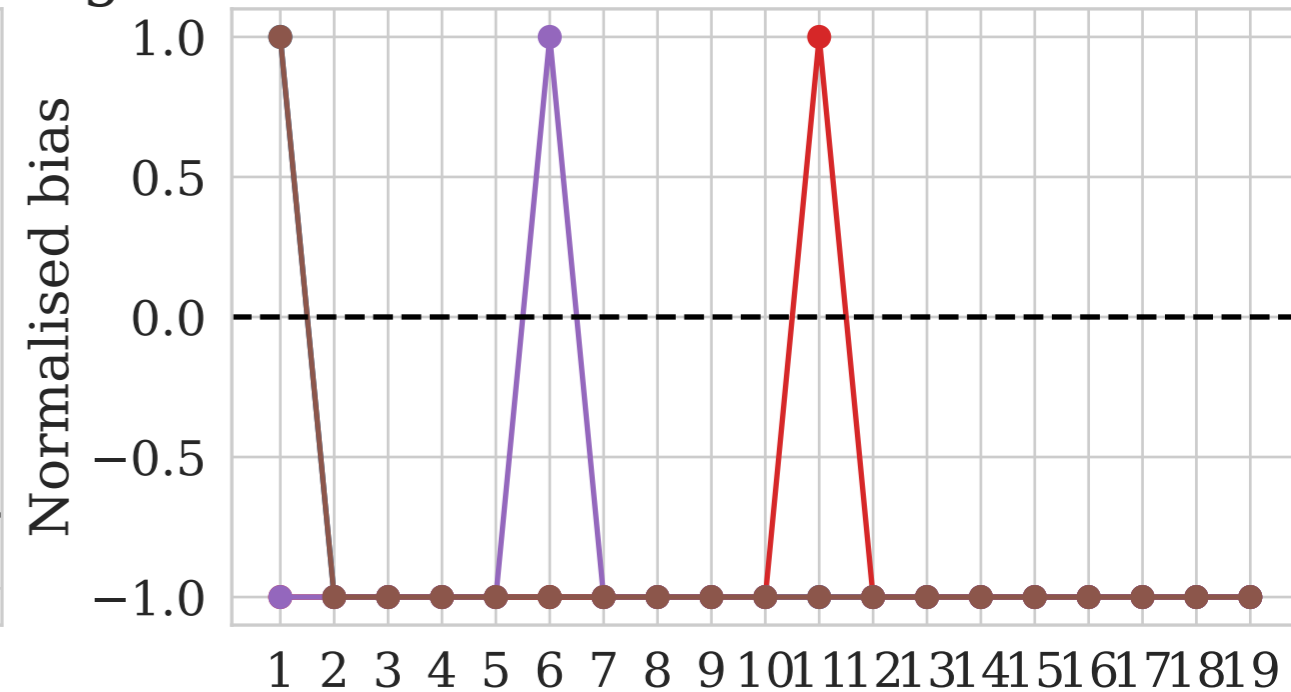

● Class 0   
 ● Class 1   
 ● Class 2   
 ● Class 3   
 ● Class 4   
 ● Class 5

13-uniform hypergraph, number of hyperedges: 1

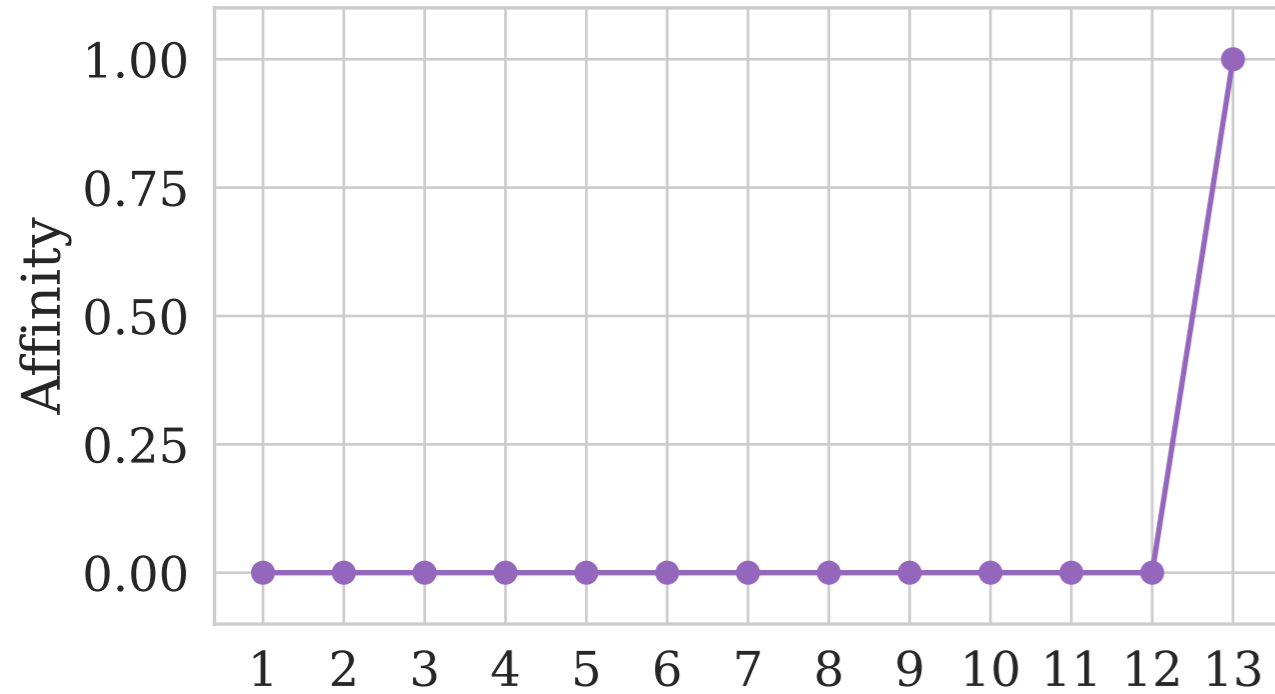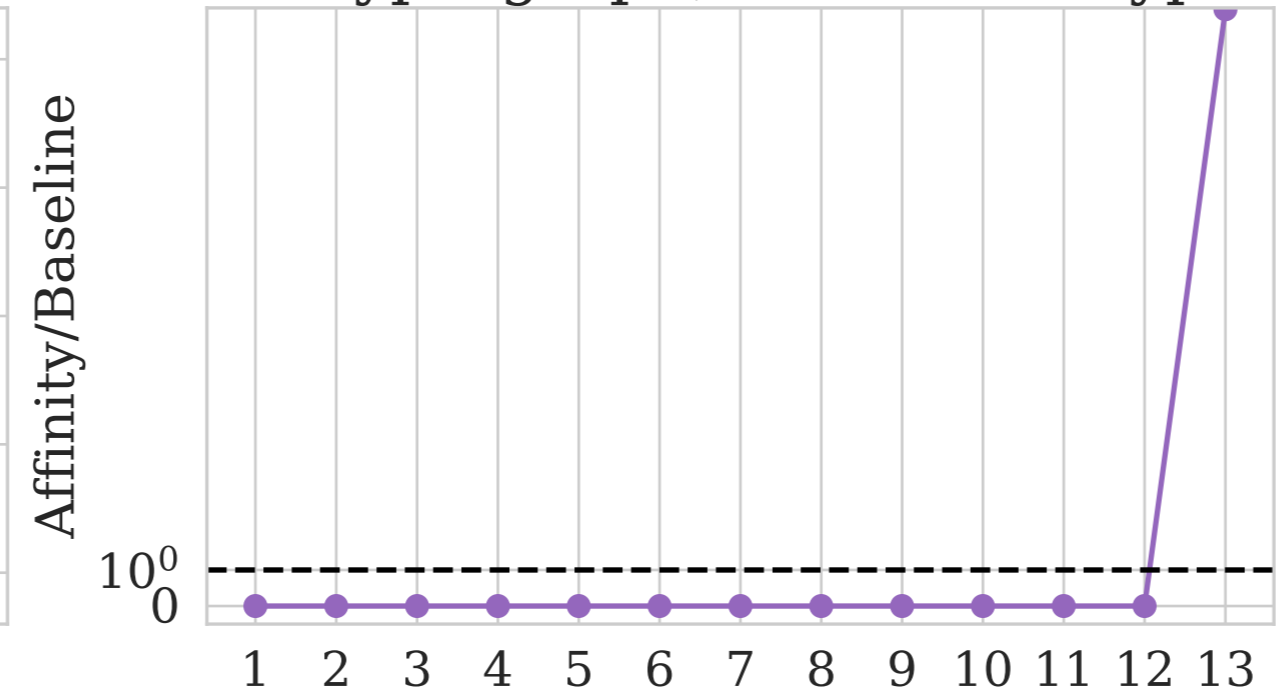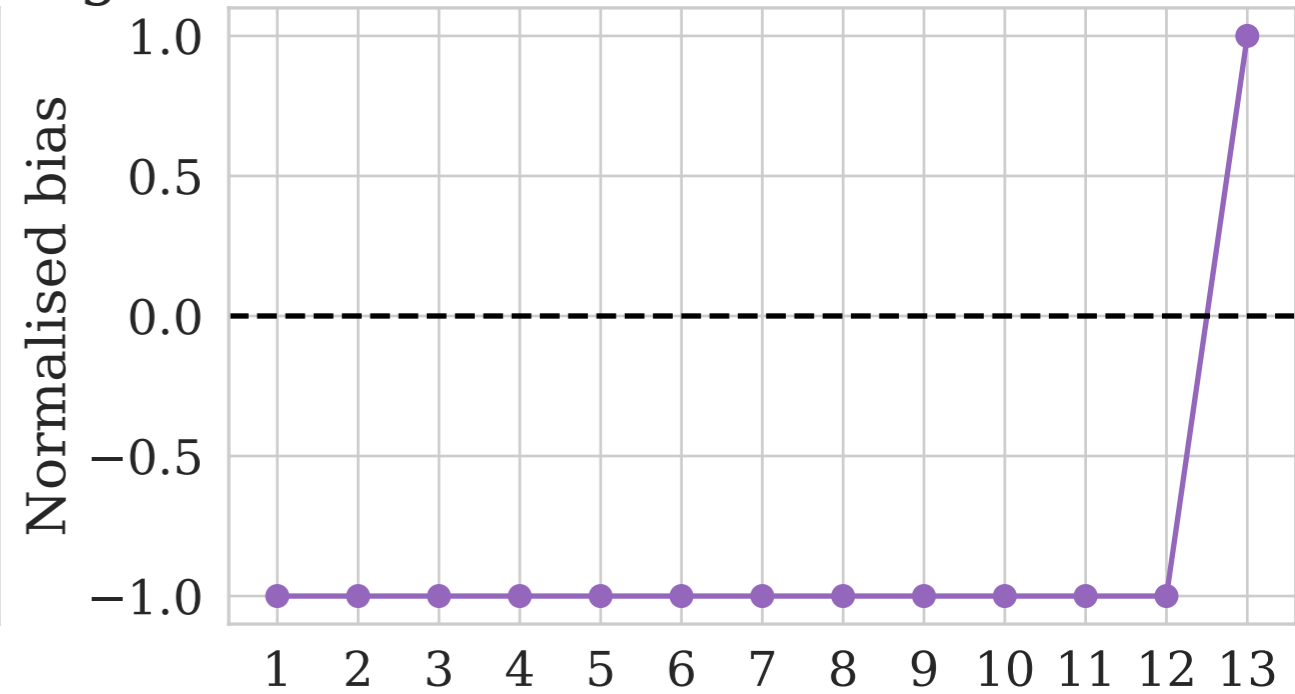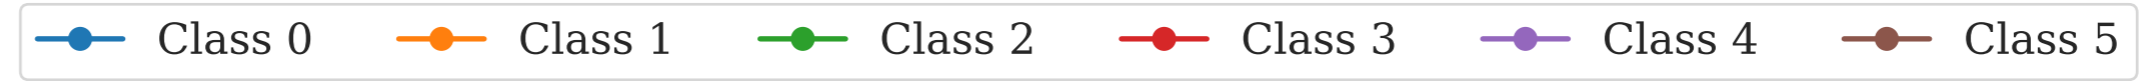

14-uniform hypergraph, number of hyperedges: 1

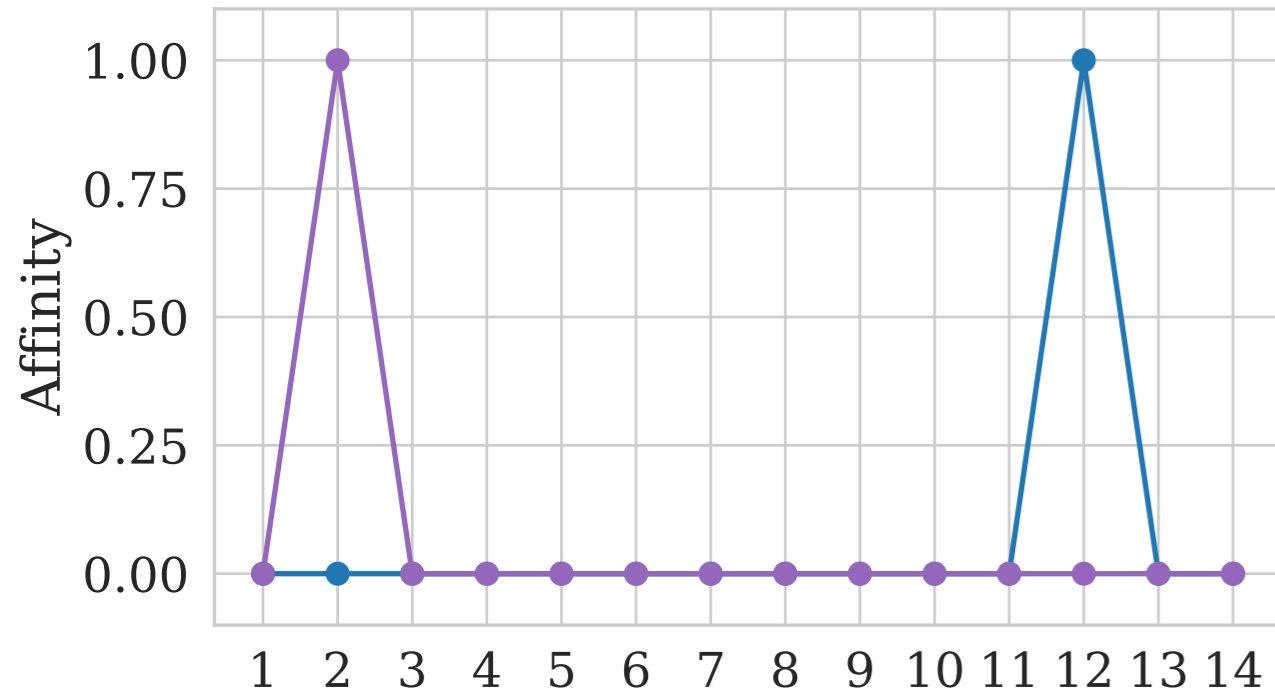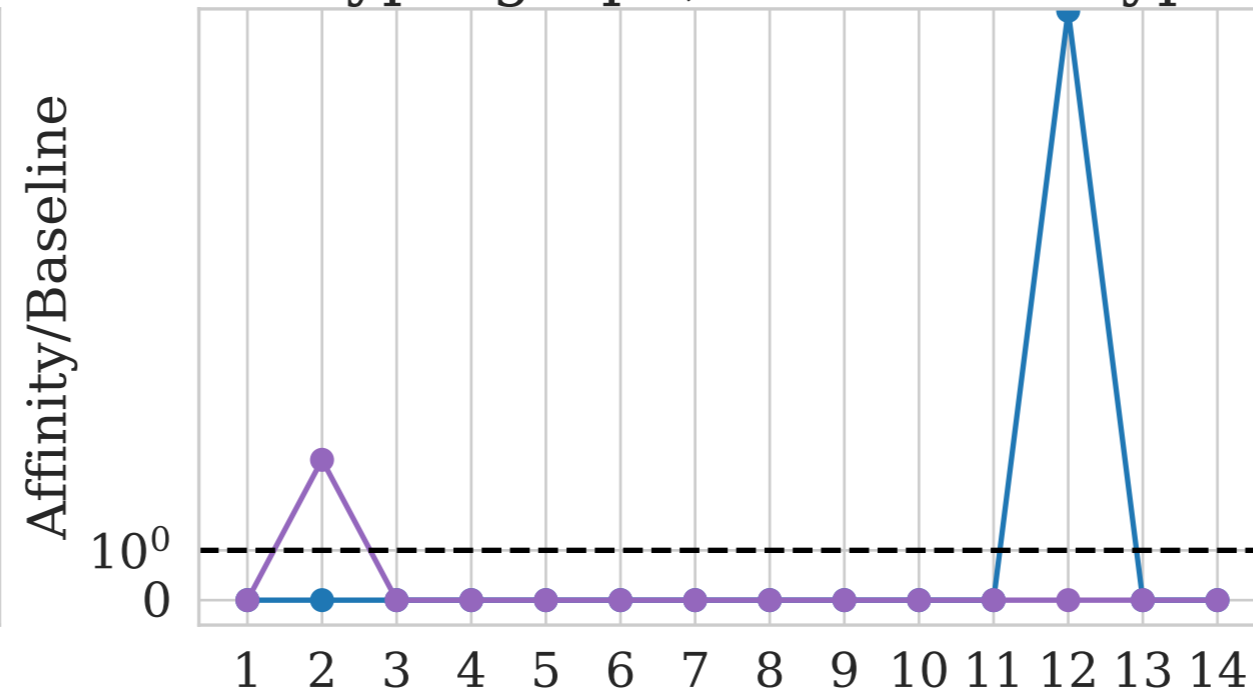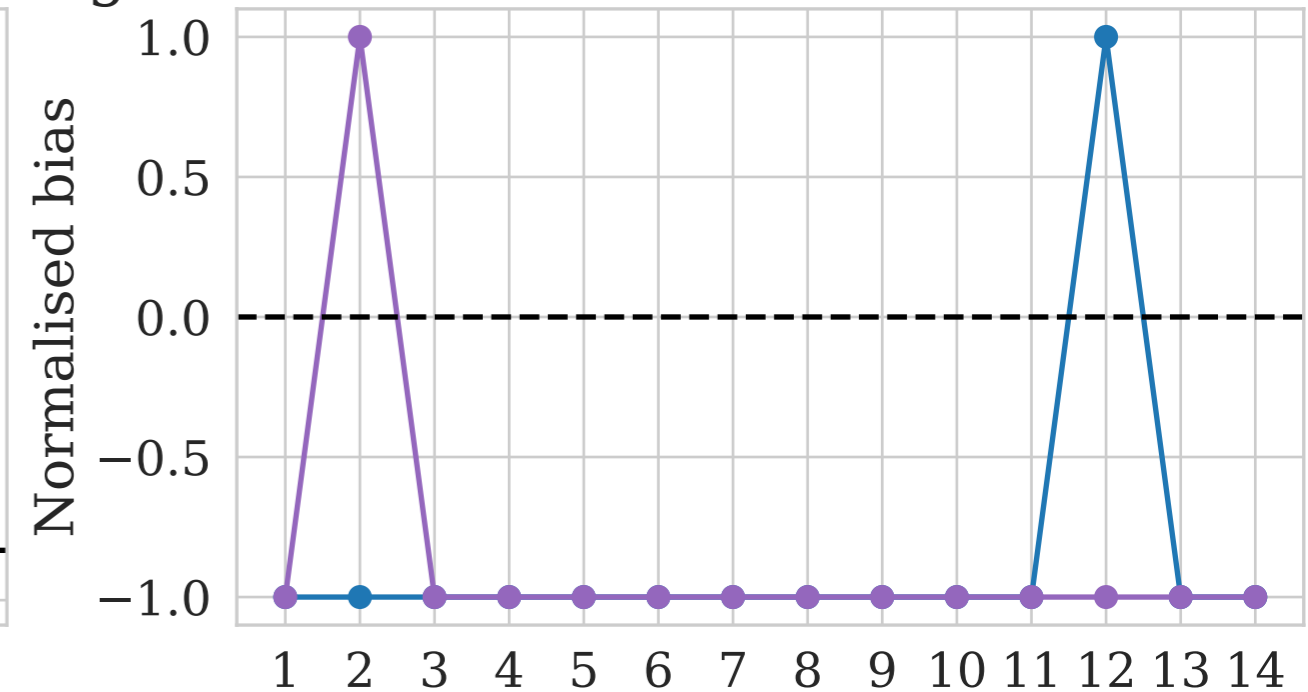

● Class 0
 ● Class 1
 ● Class 2
 ● Class 3
 ● Class 4
 ● Class 5

15-uniform hypergraph, number of hyperedges: 1

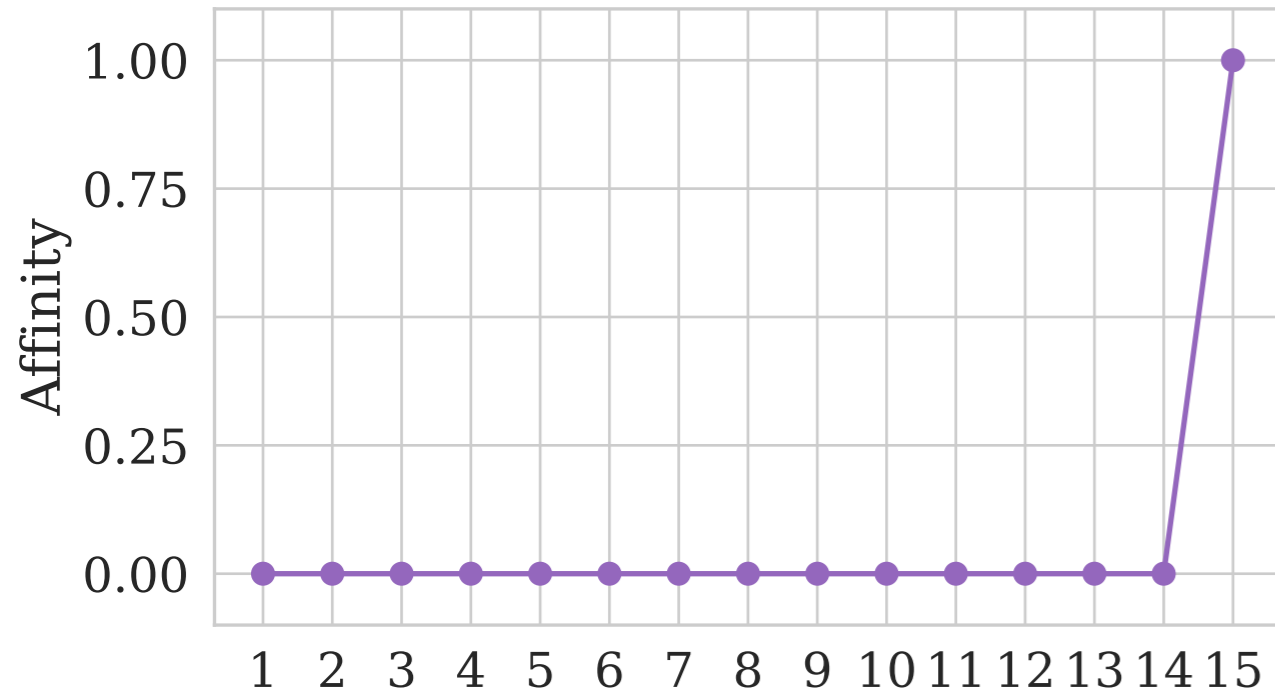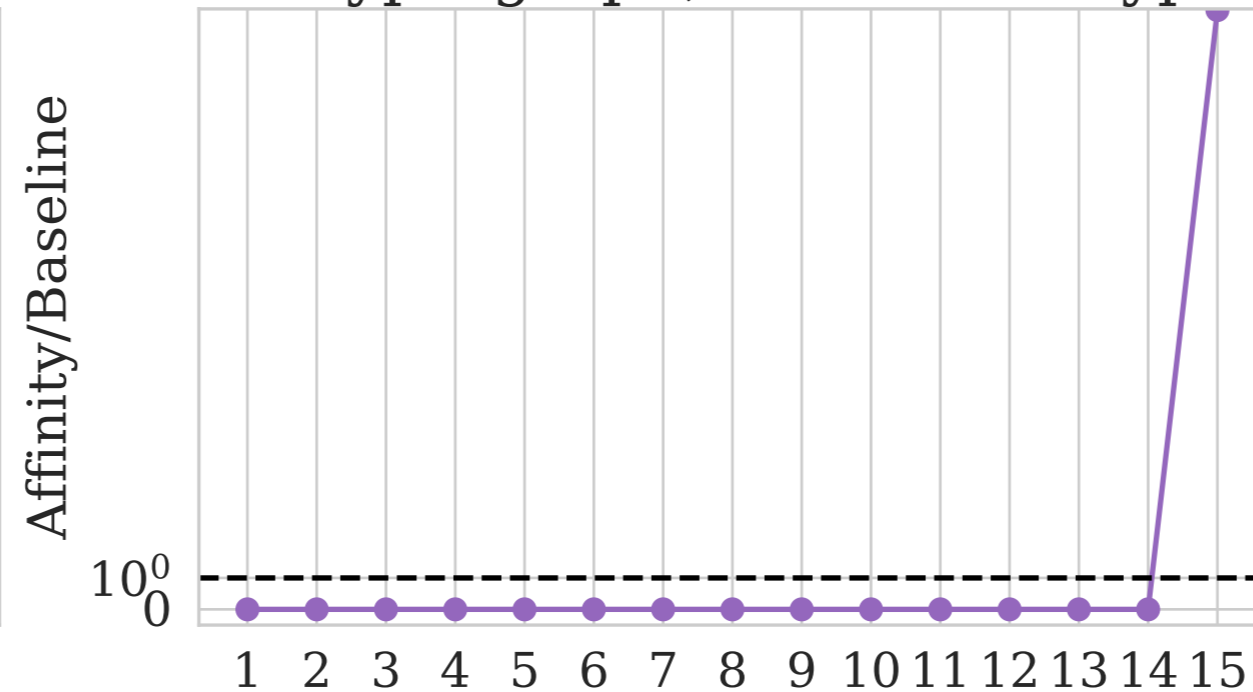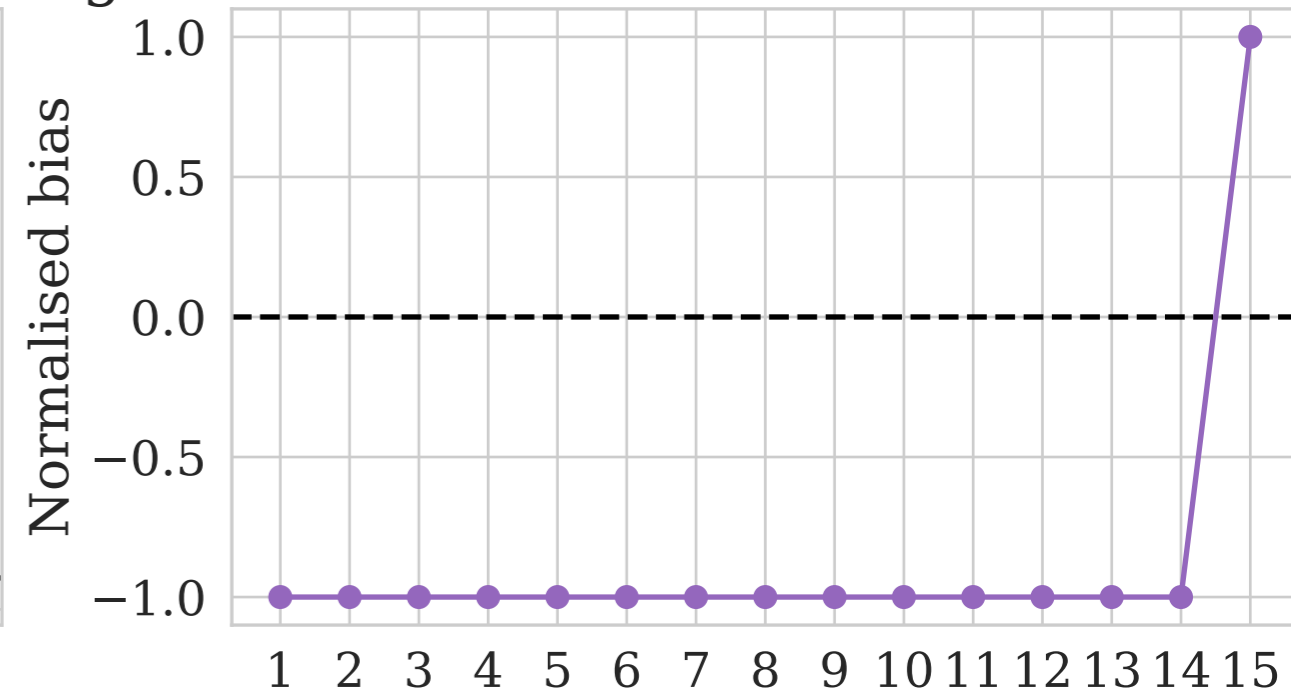

● Class 0
 ● Class 1
 ● Class 2
 ● Class 3
 ● Class 4
 ● Class 5

18-uniform hypergraph, number of hyperedges: 1

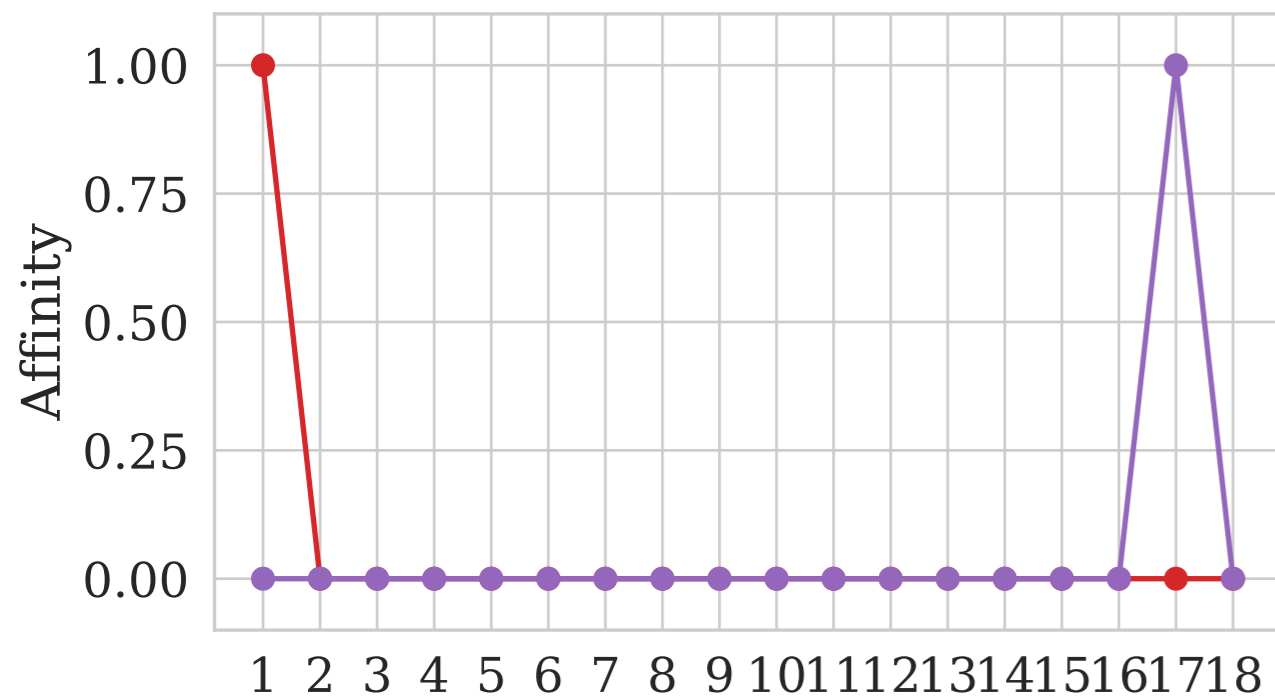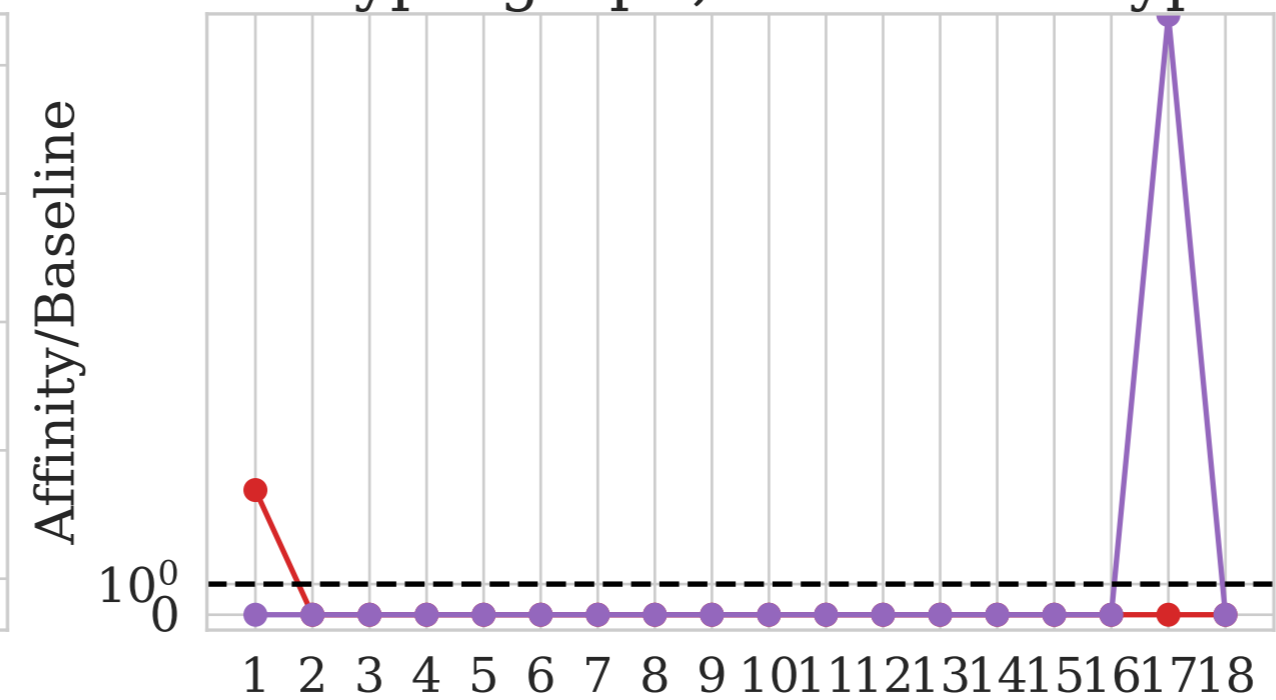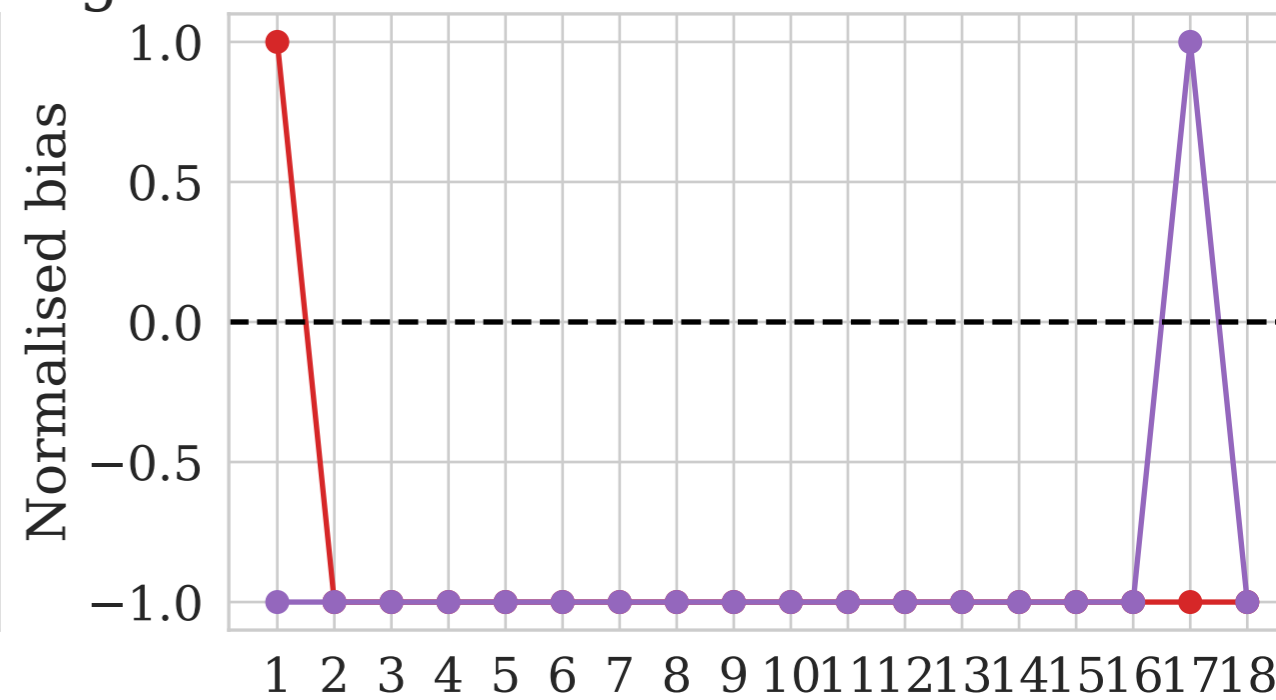

● Class 0   
 ● Class 1   
 ● Class 2   
 ● Class 3   
 ● Class 4   
 ● Class 5

26-uniform hypergraph, number of hyperedges: 1

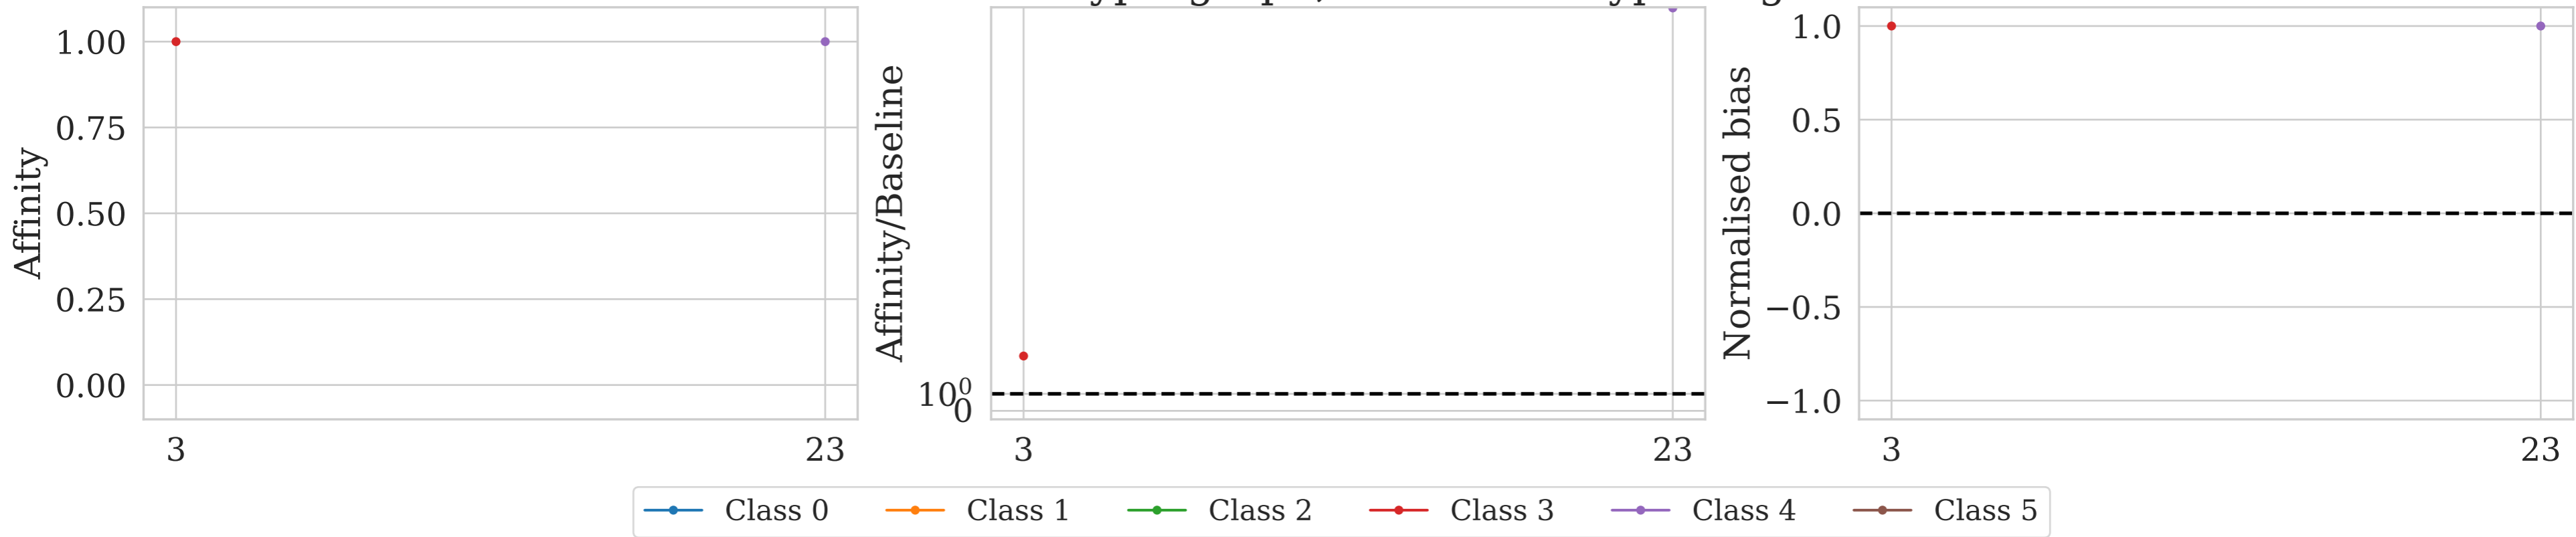

Supplement: supplementary_material [file attachment]
