# Supplementary material
Source: ML conference proceedings conference paper supplement (https://openreview.net/forum?id=YPpkFqMX6V)

41-uniform hypergraph, number of hyperedges: 2

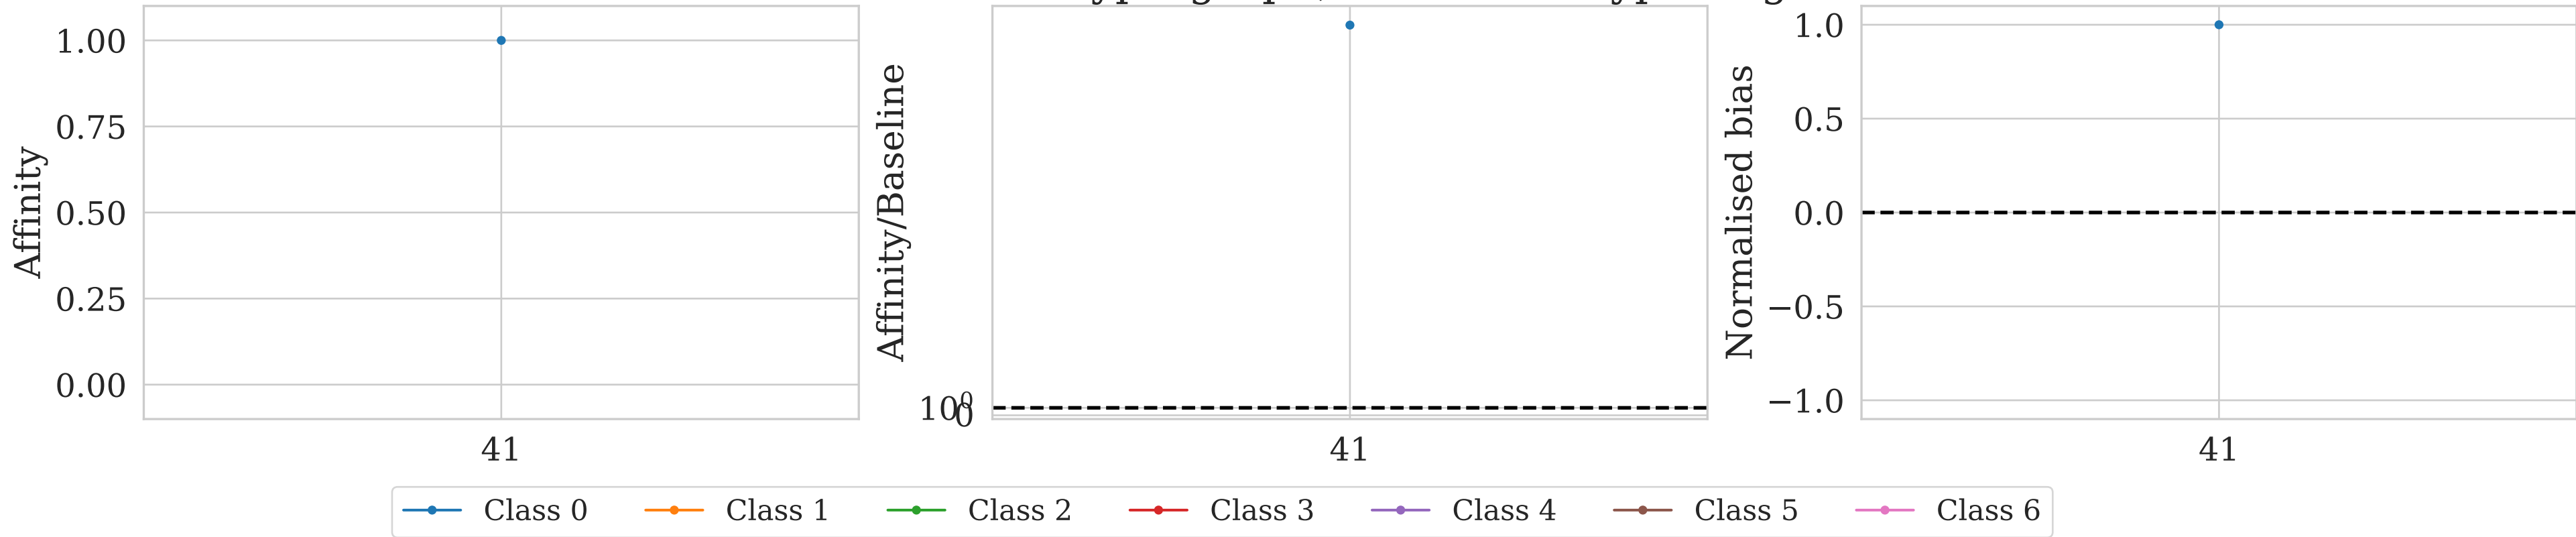

8-uniform hypergraph, number of hyperedges: 2

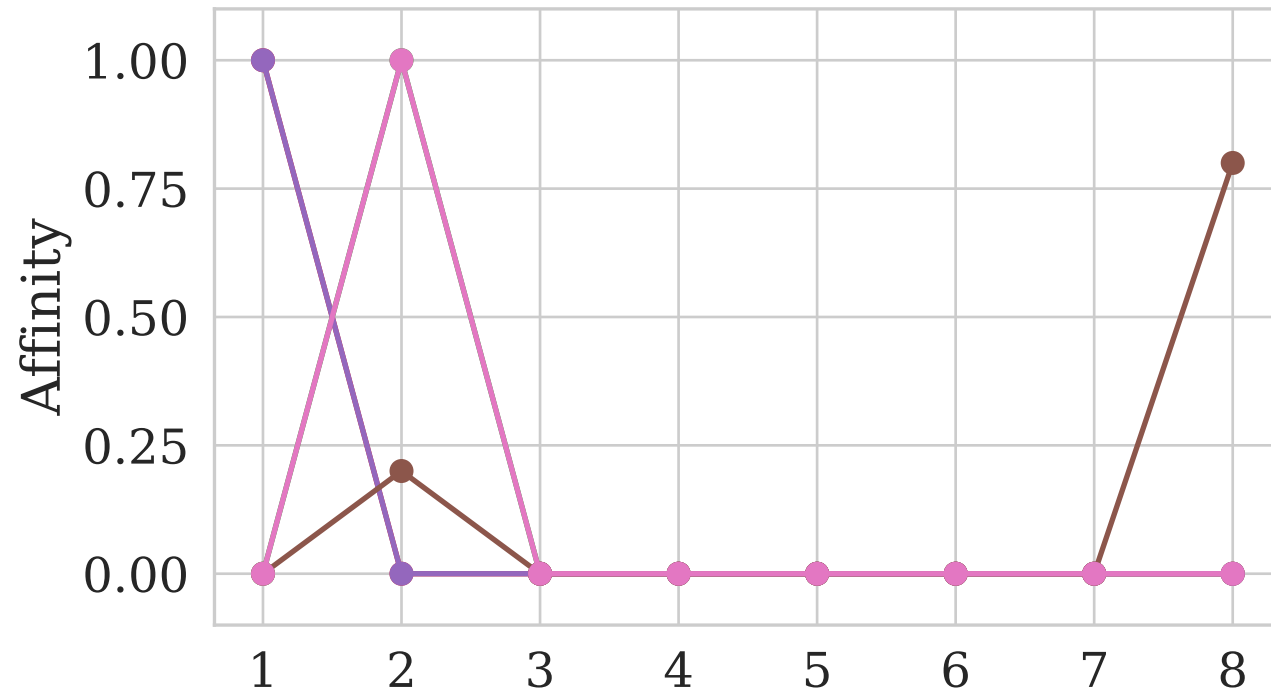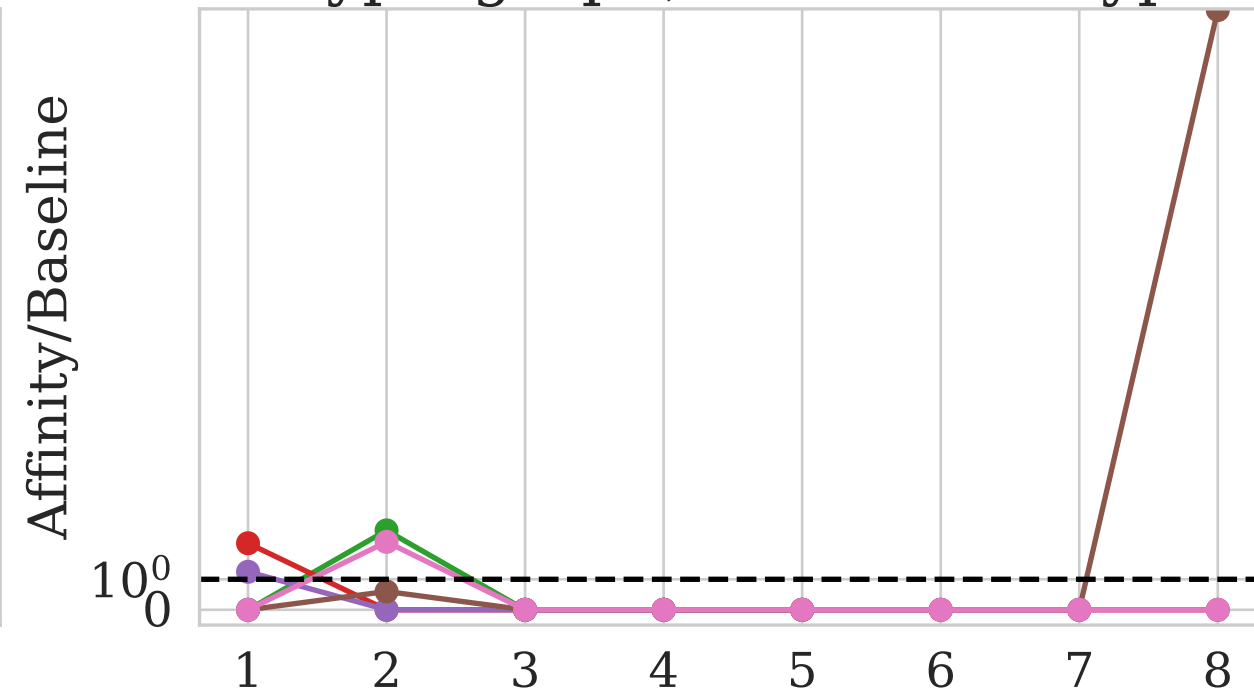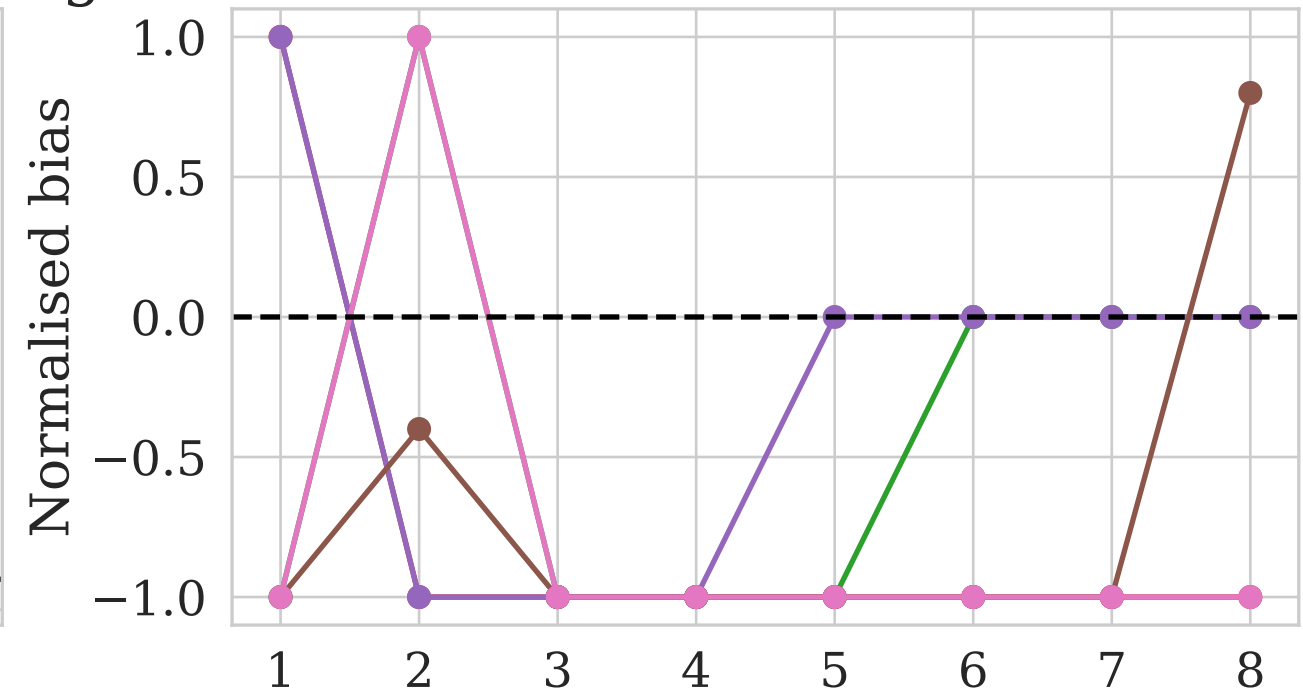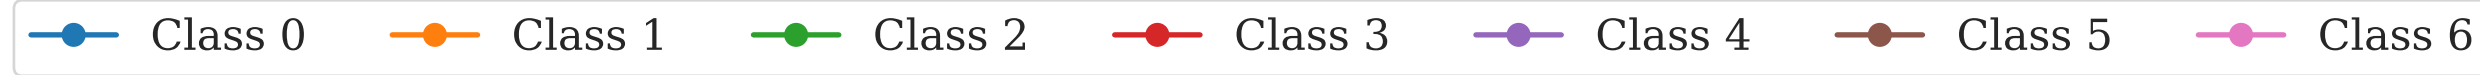

10-uniform hypergraph, number of hyperedges: 2

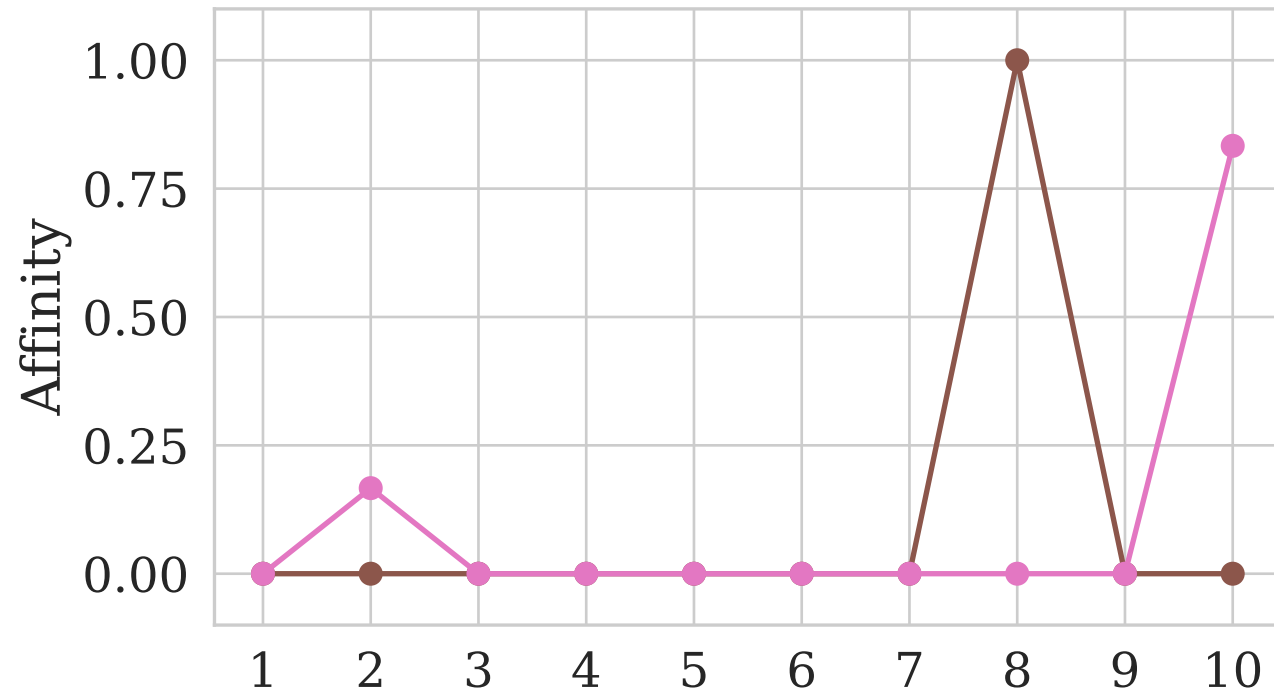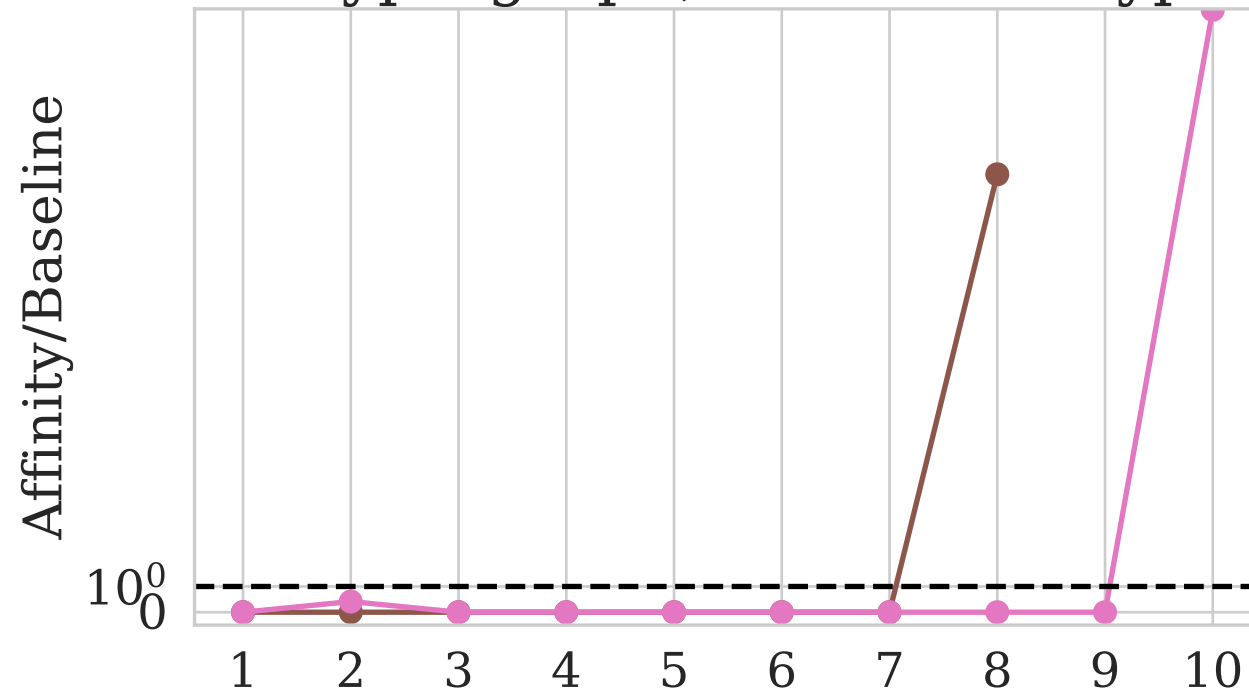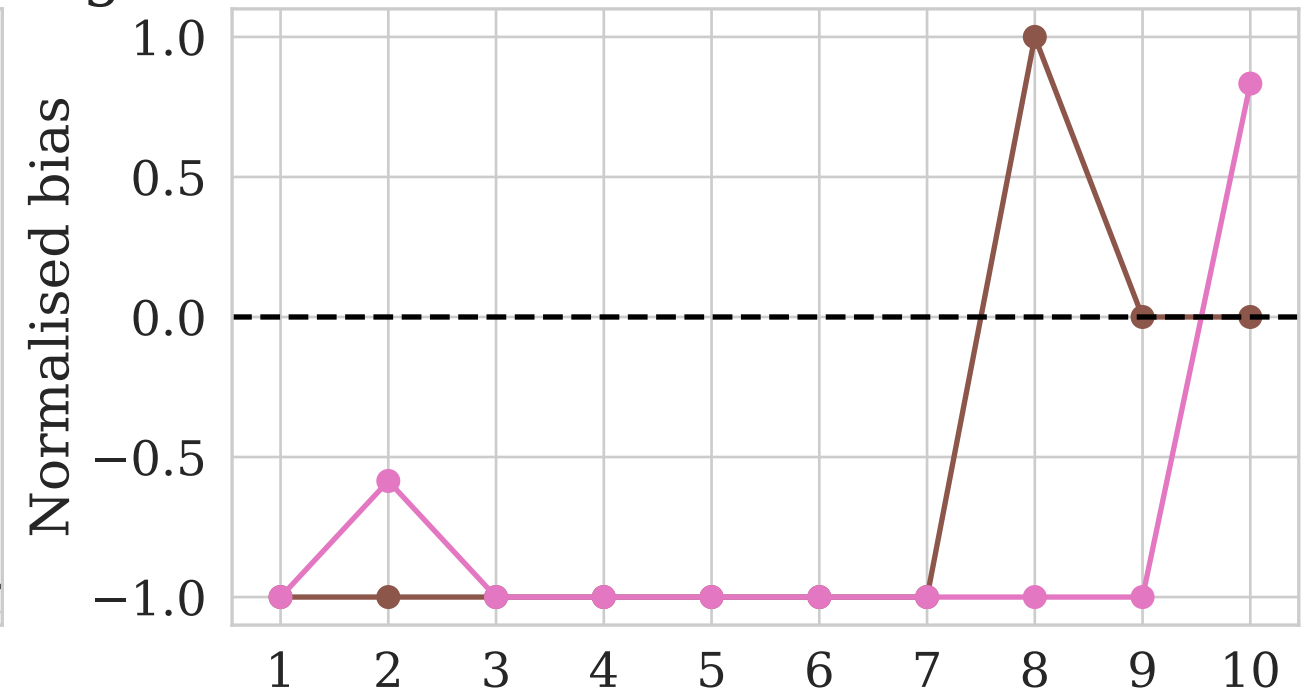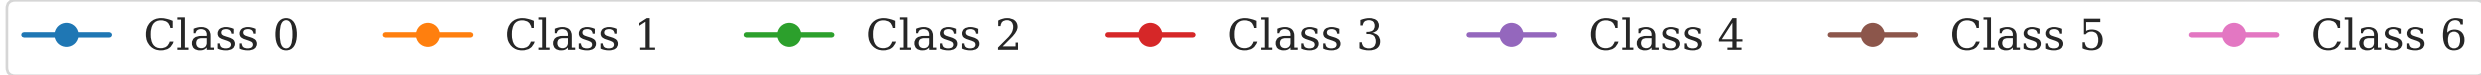

13-uniform hypergraph, number of hyperedges: 2

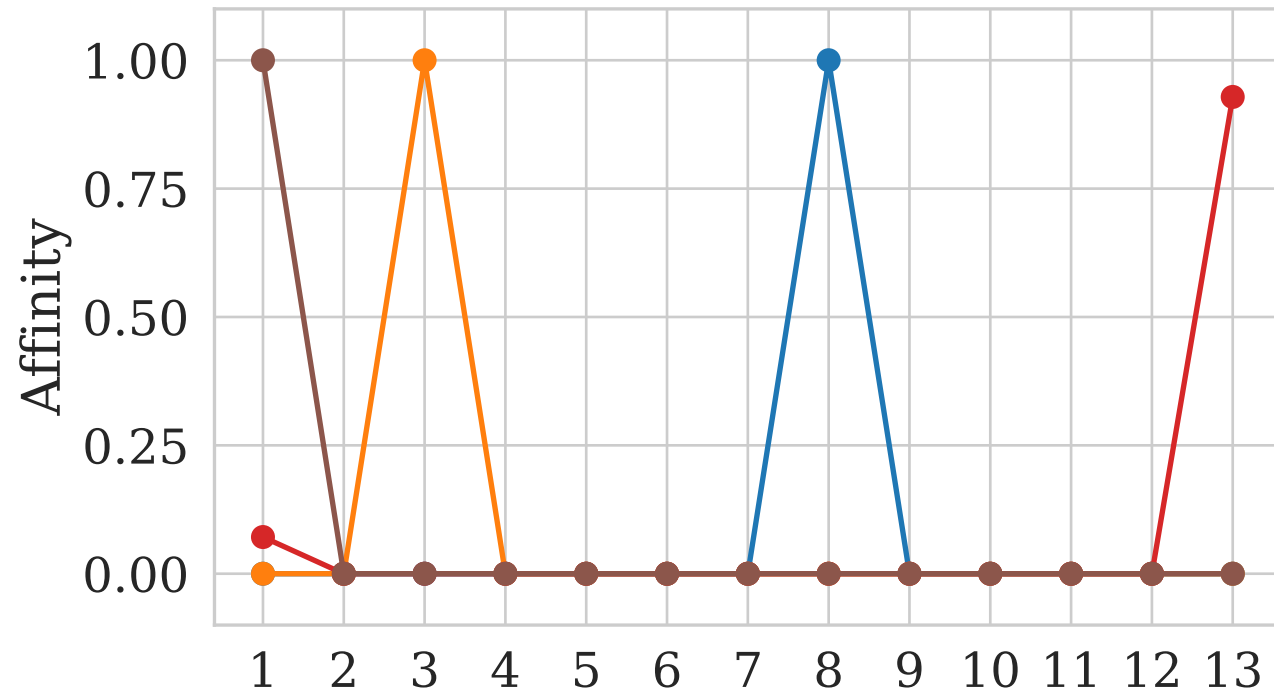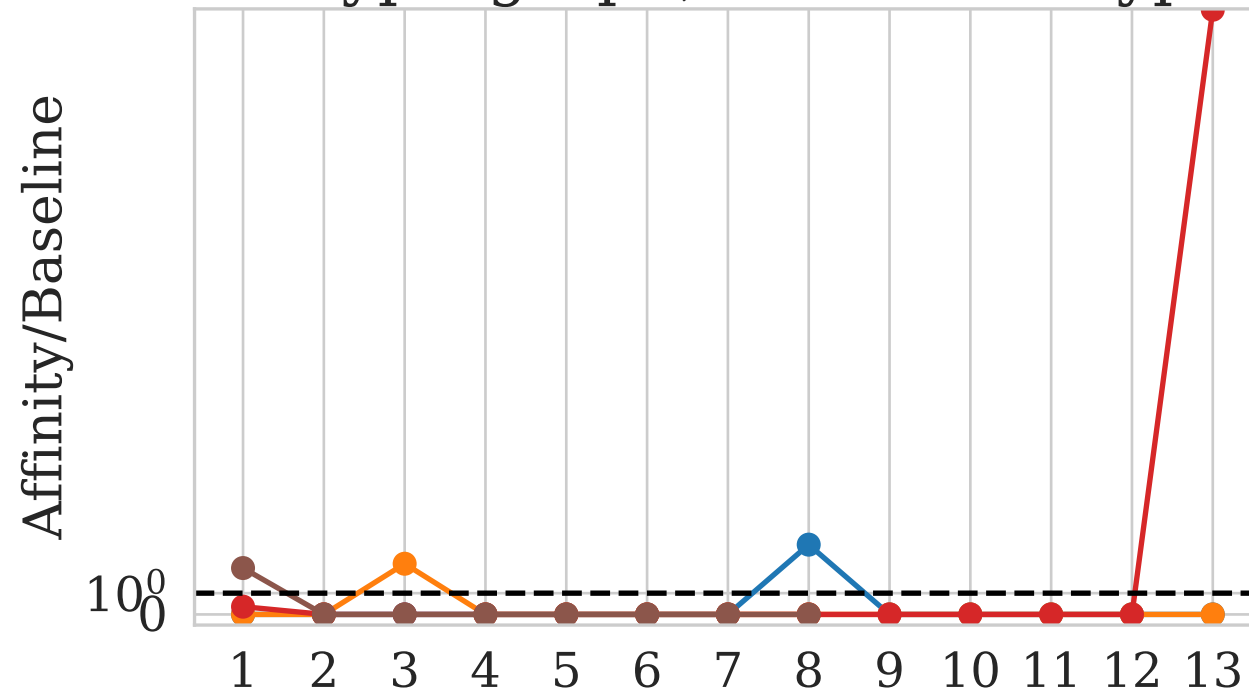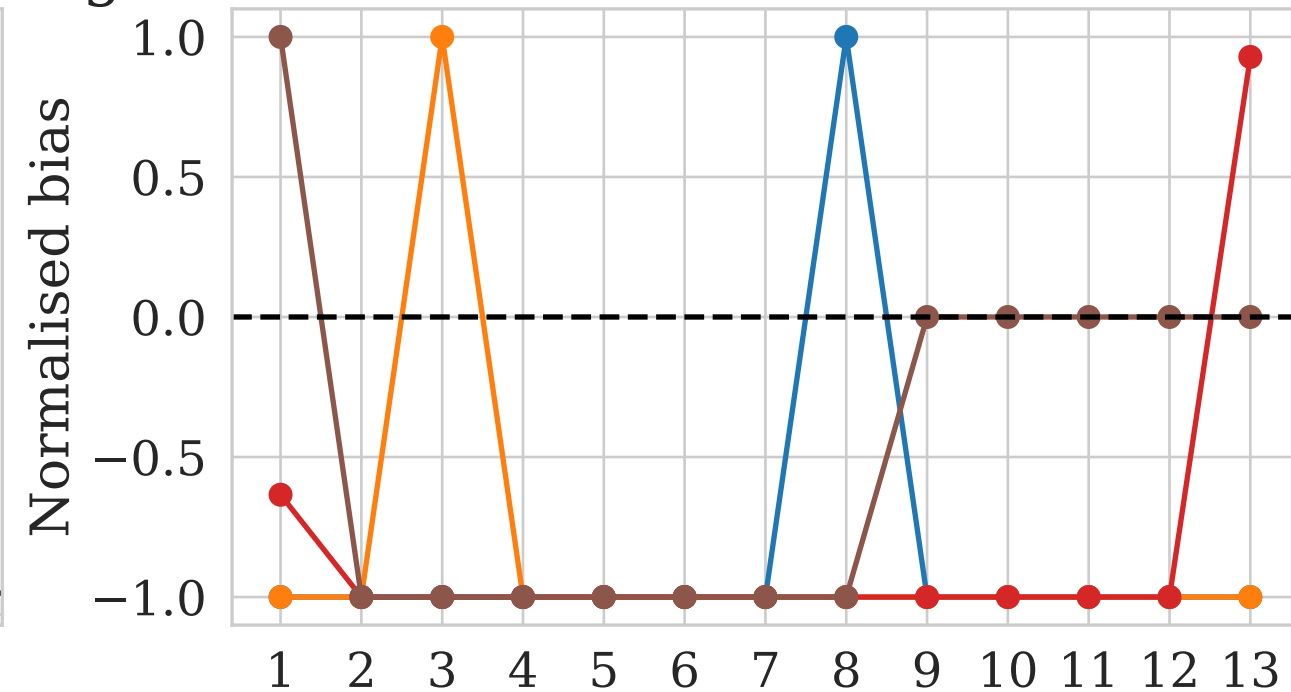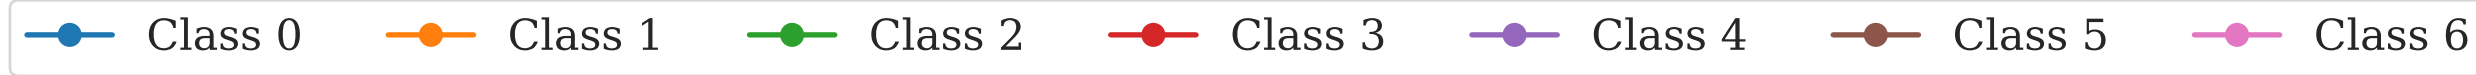

20-uniform hypergraph, number of hyperedges: 2

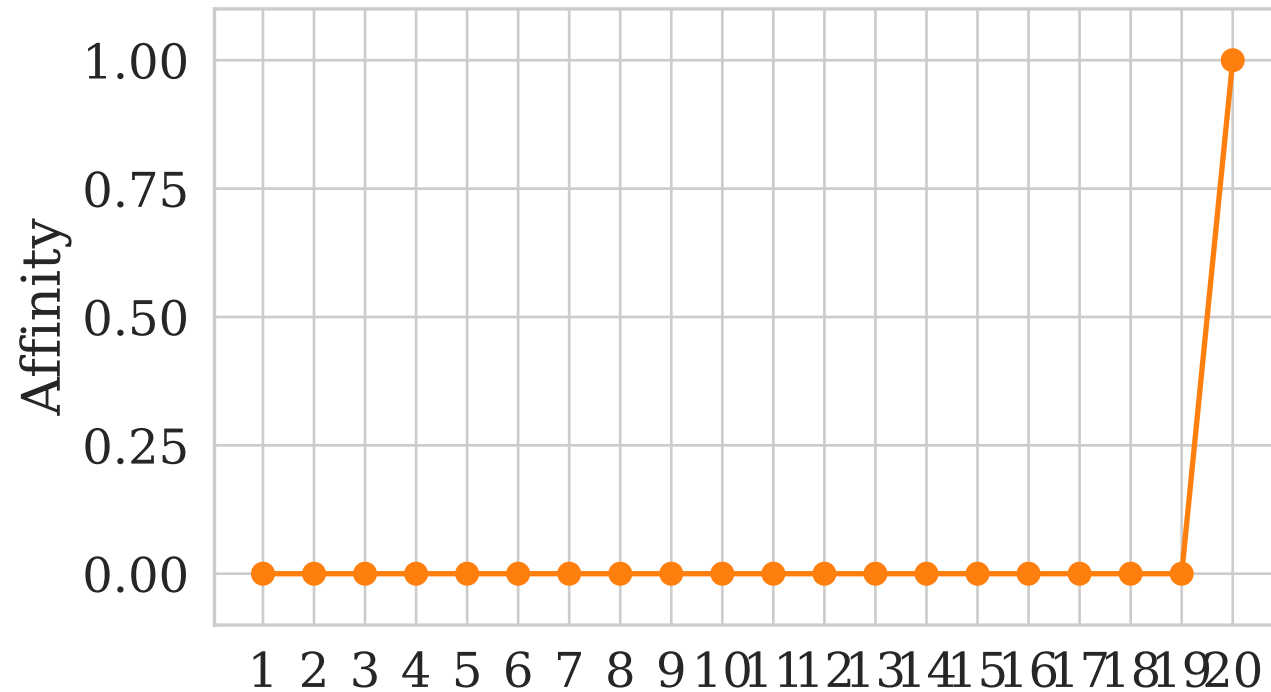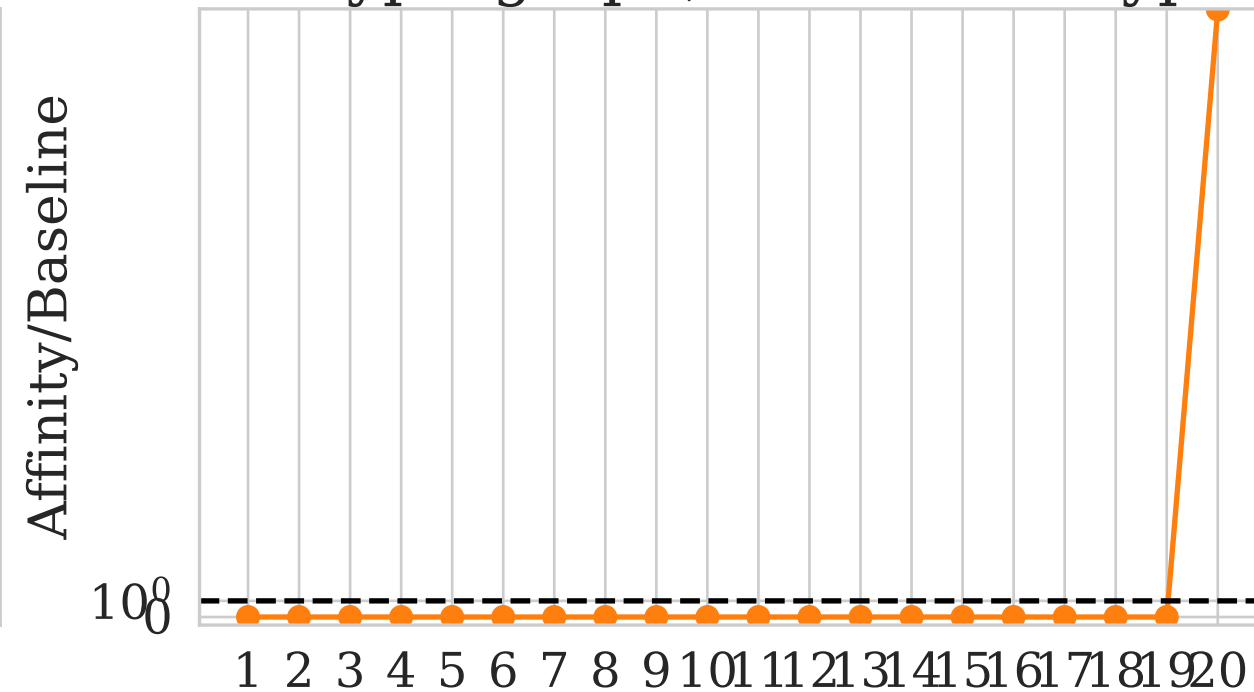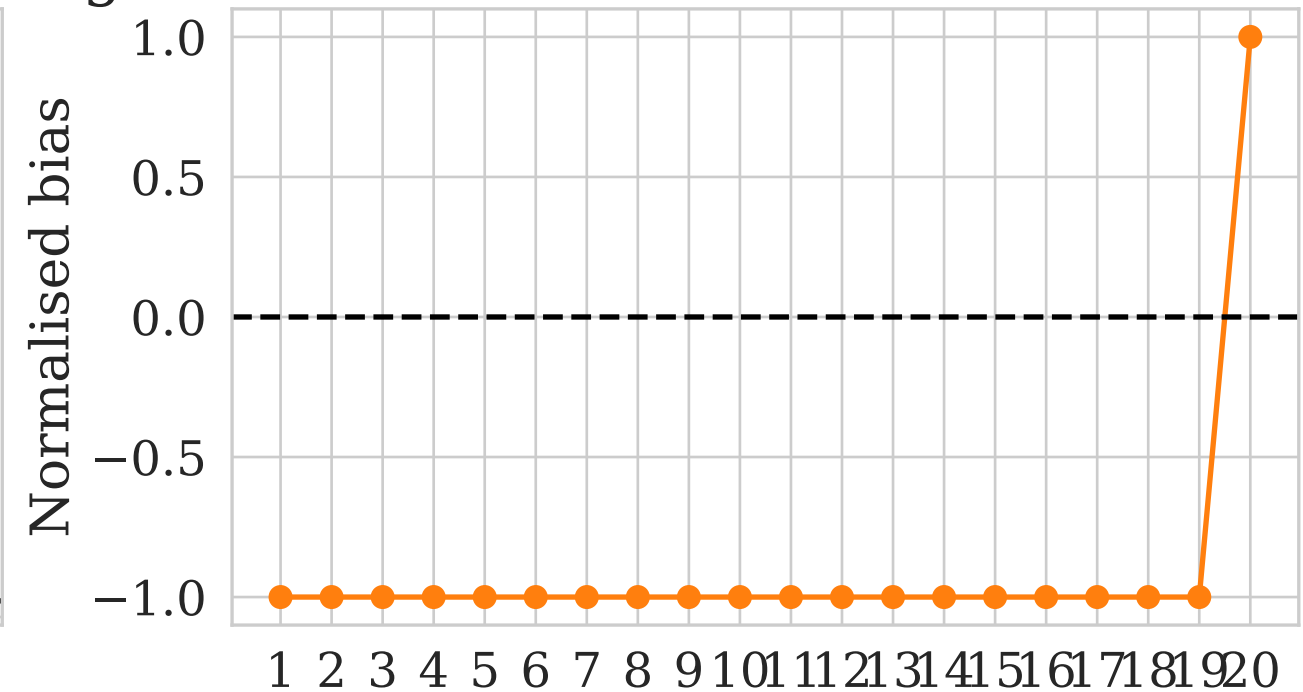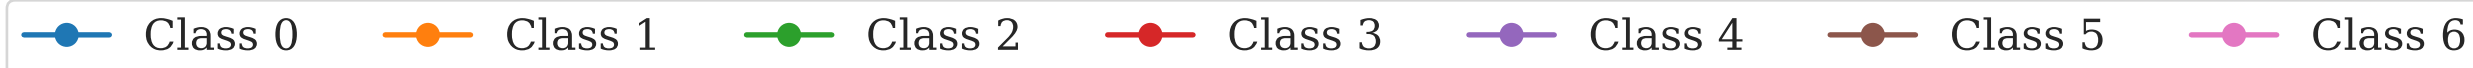

23-uniform hypergraph, number of hyperedges: 1

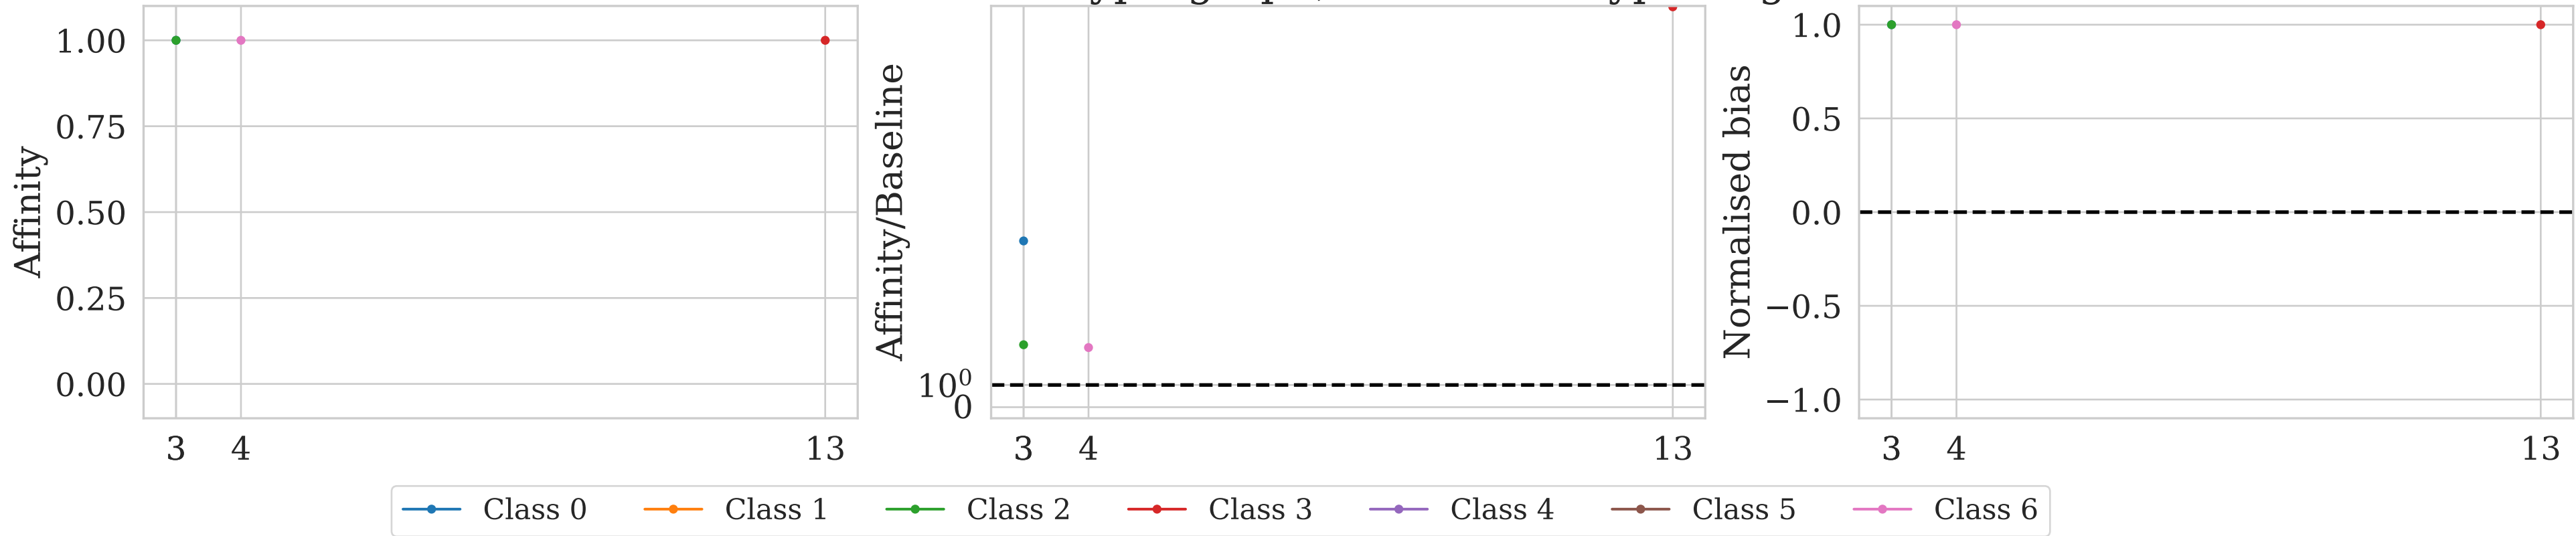

38-uniform hypergraph, number of hyperedges: 1

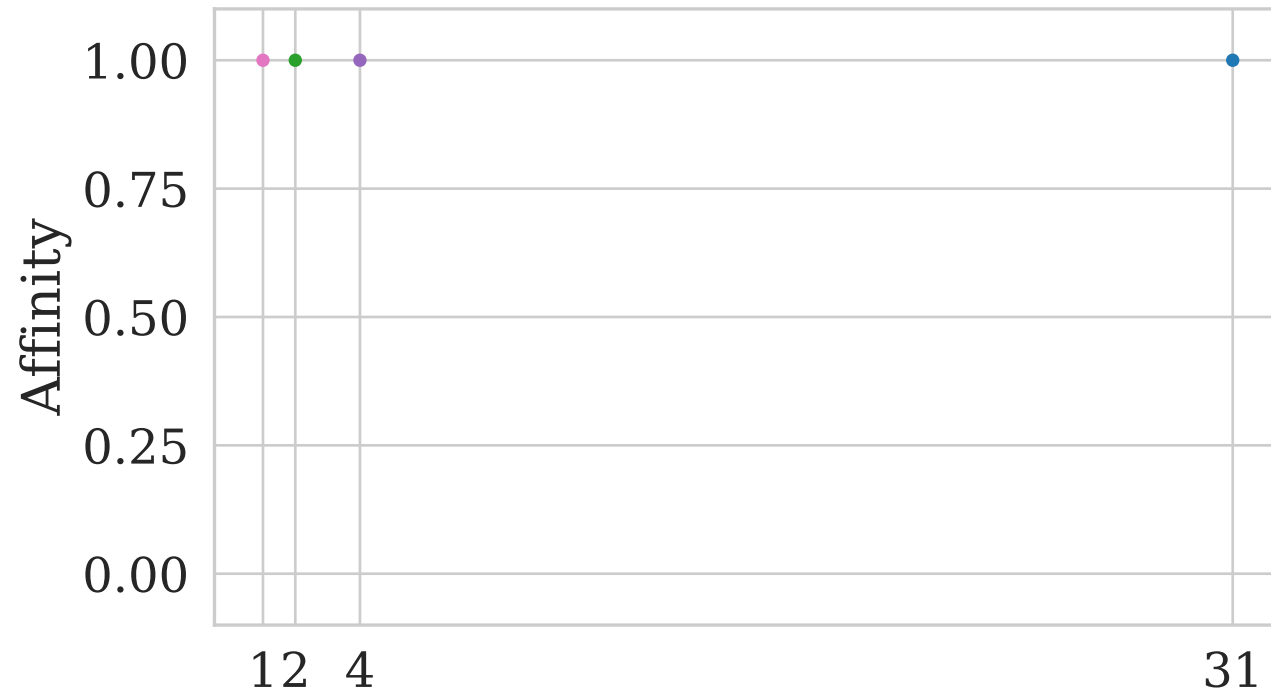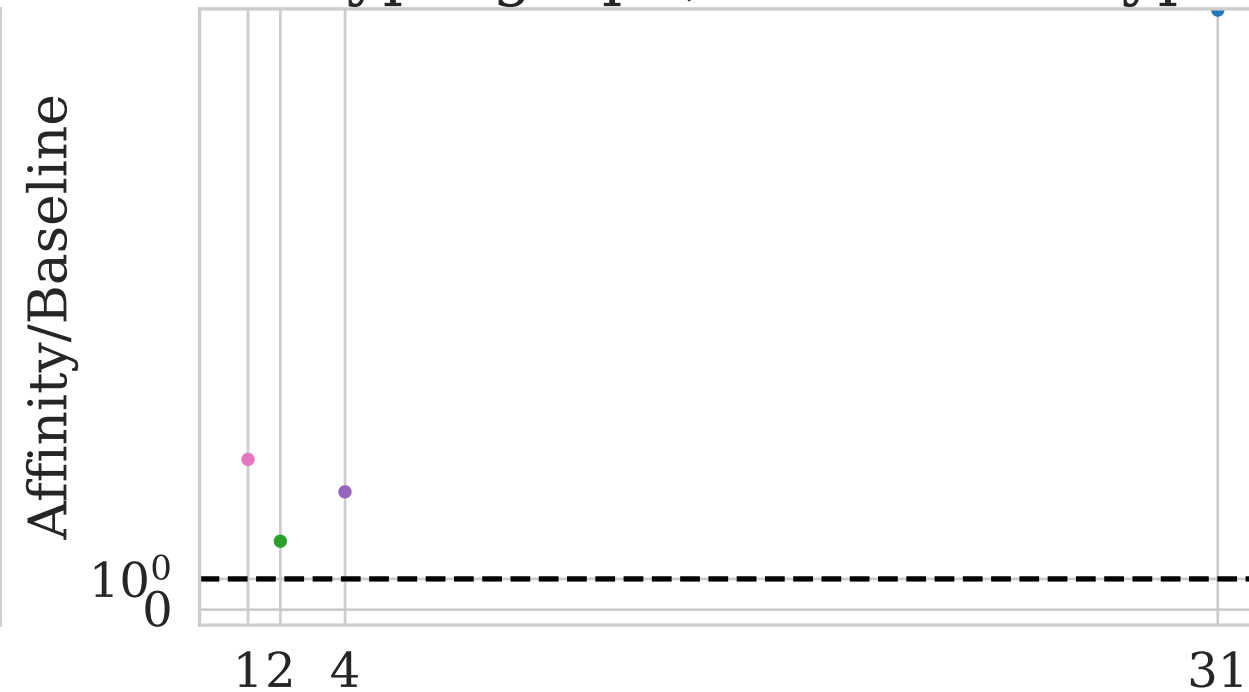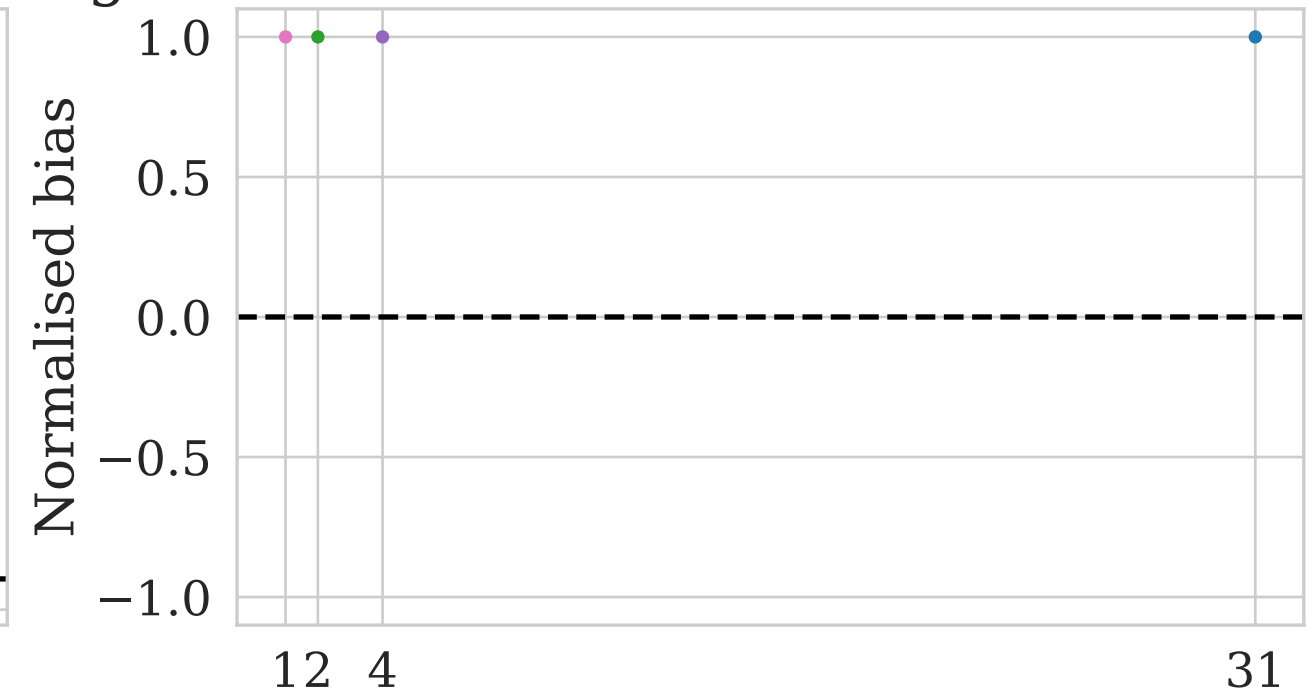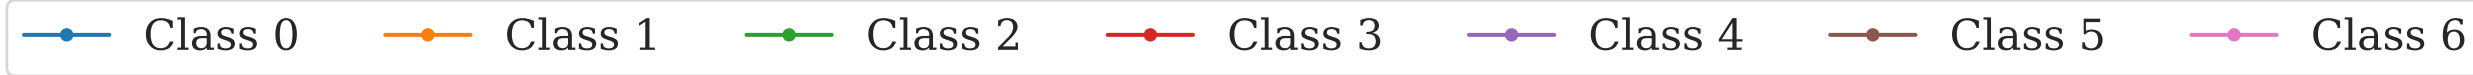

36-uniform hypergraph, number of hyperedges: 1

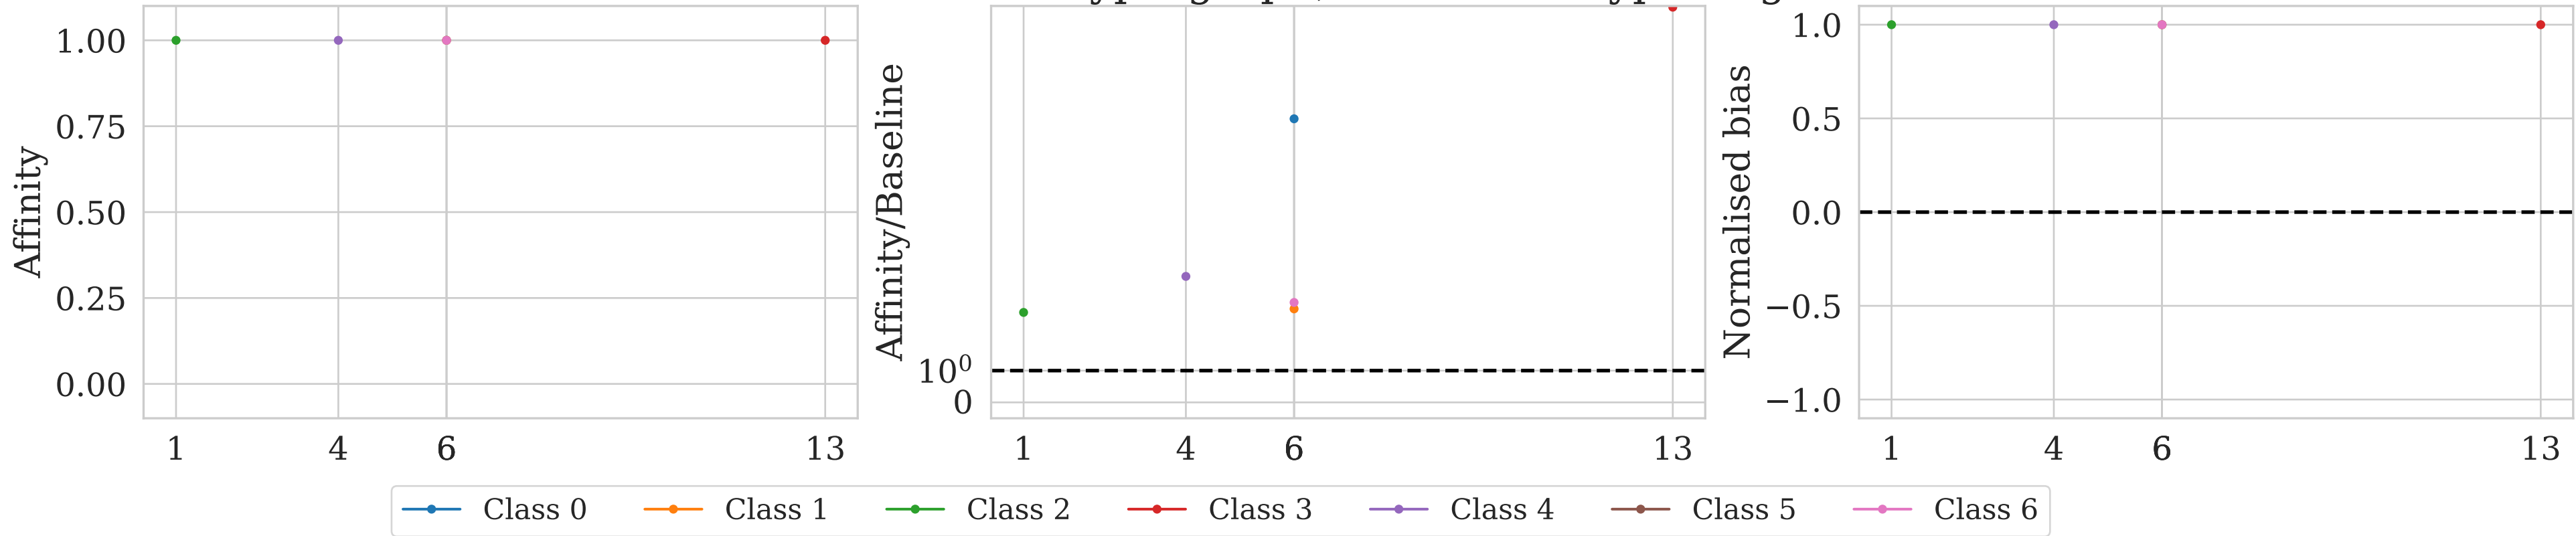



27-uniform hypergraph, number of hyperedges: 1

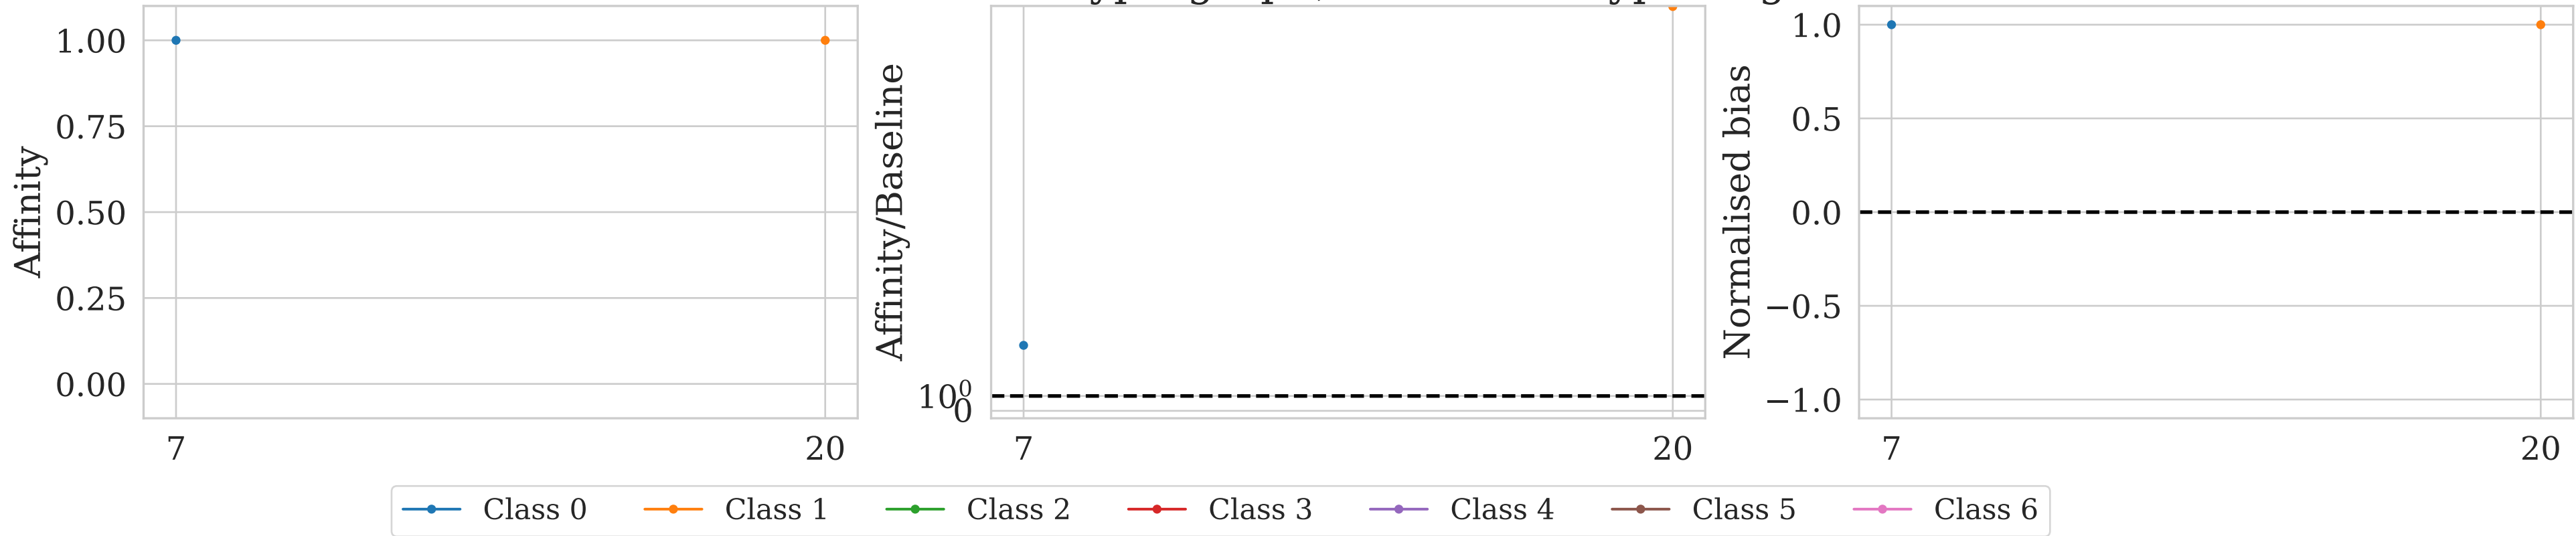

26-uniform hypergraph, number of hyperedges: 1

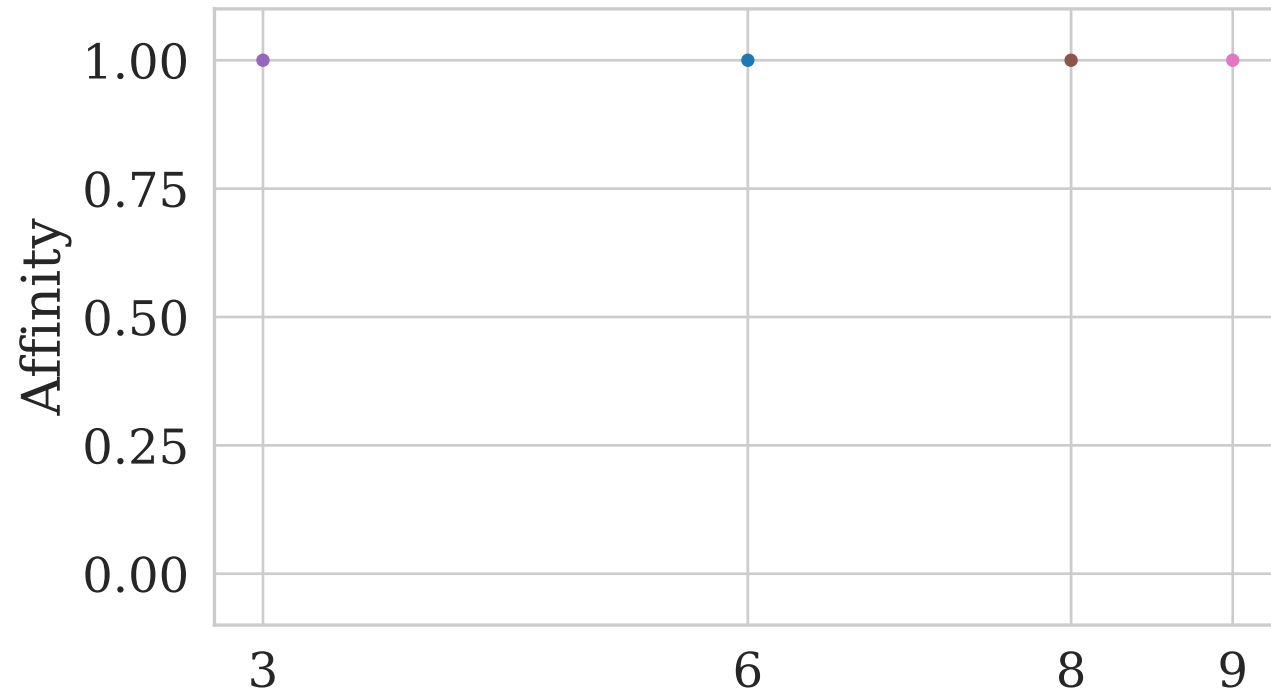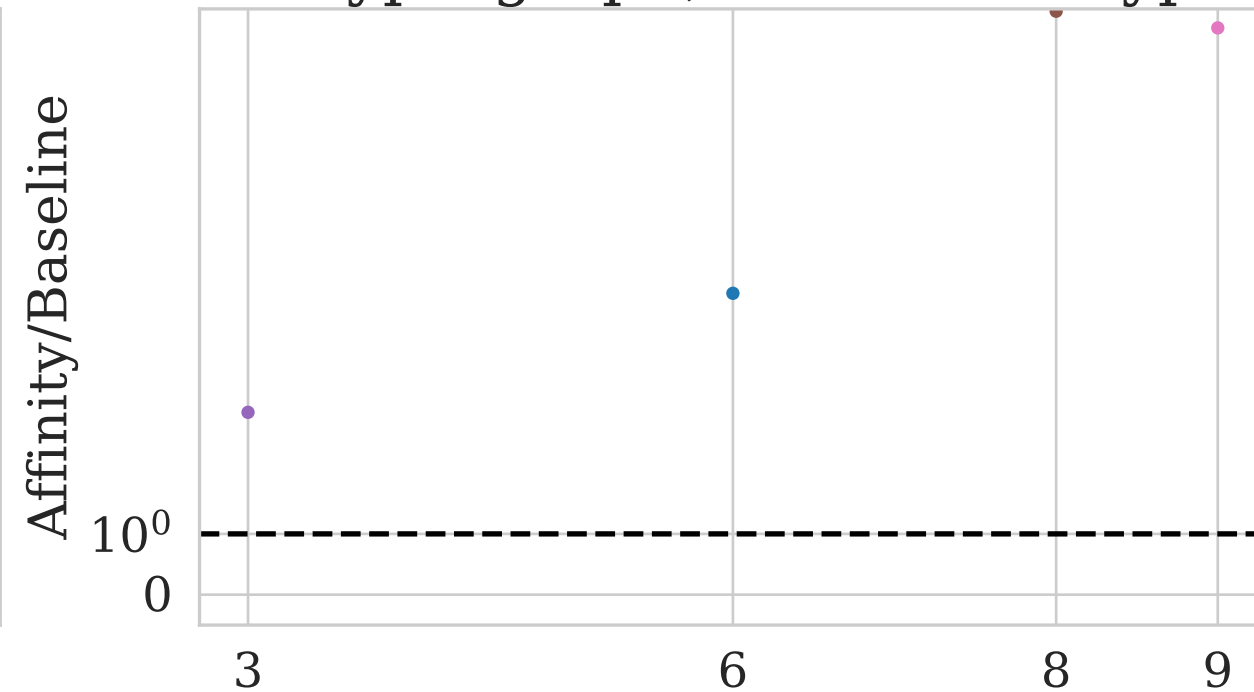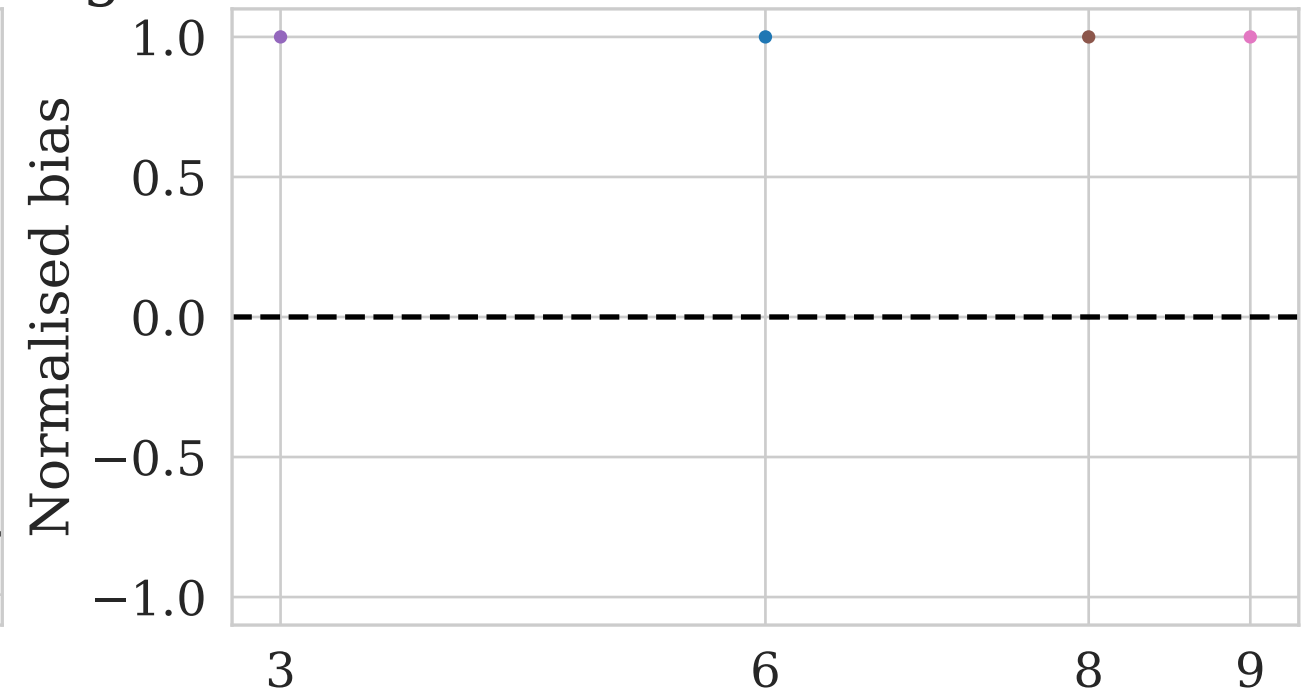

Class 0 Class 1 Class 2 Class 3 Class 4 Class 5 Class 6

24-uniform hypergraph, number of hyperedges: 1

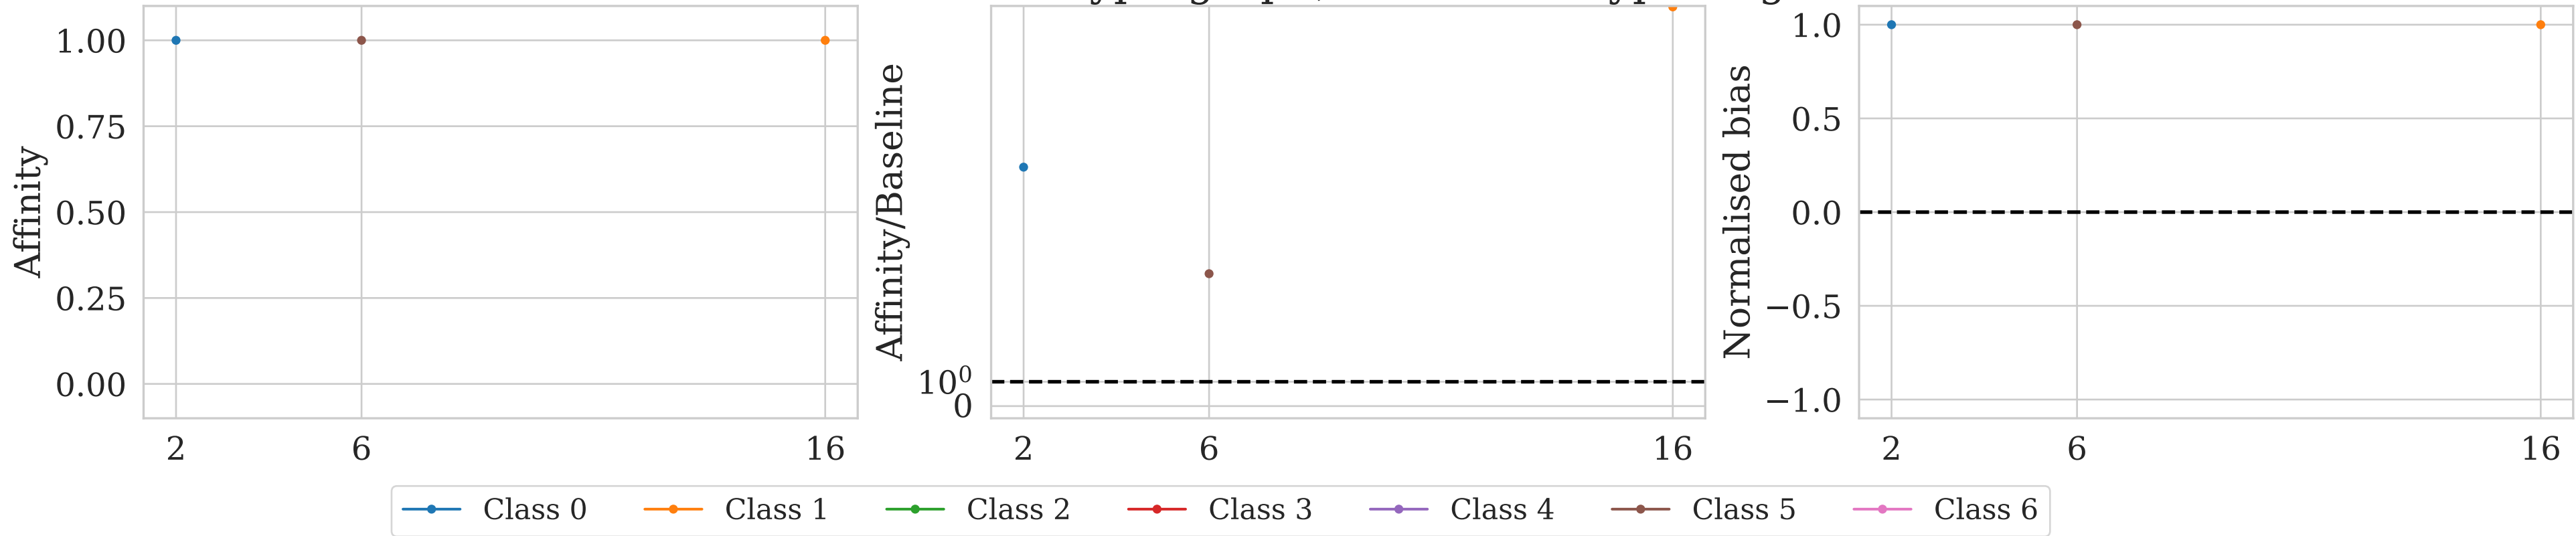

18-uniform hypergraph, number of hyperedges: 1

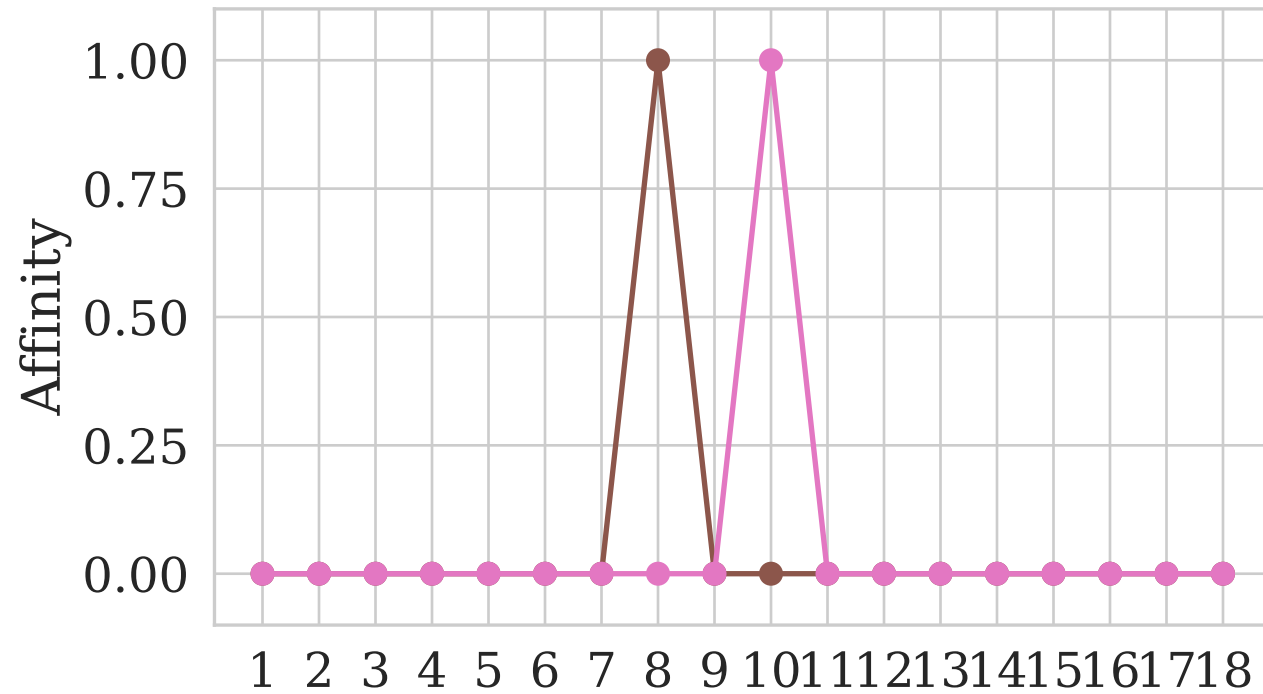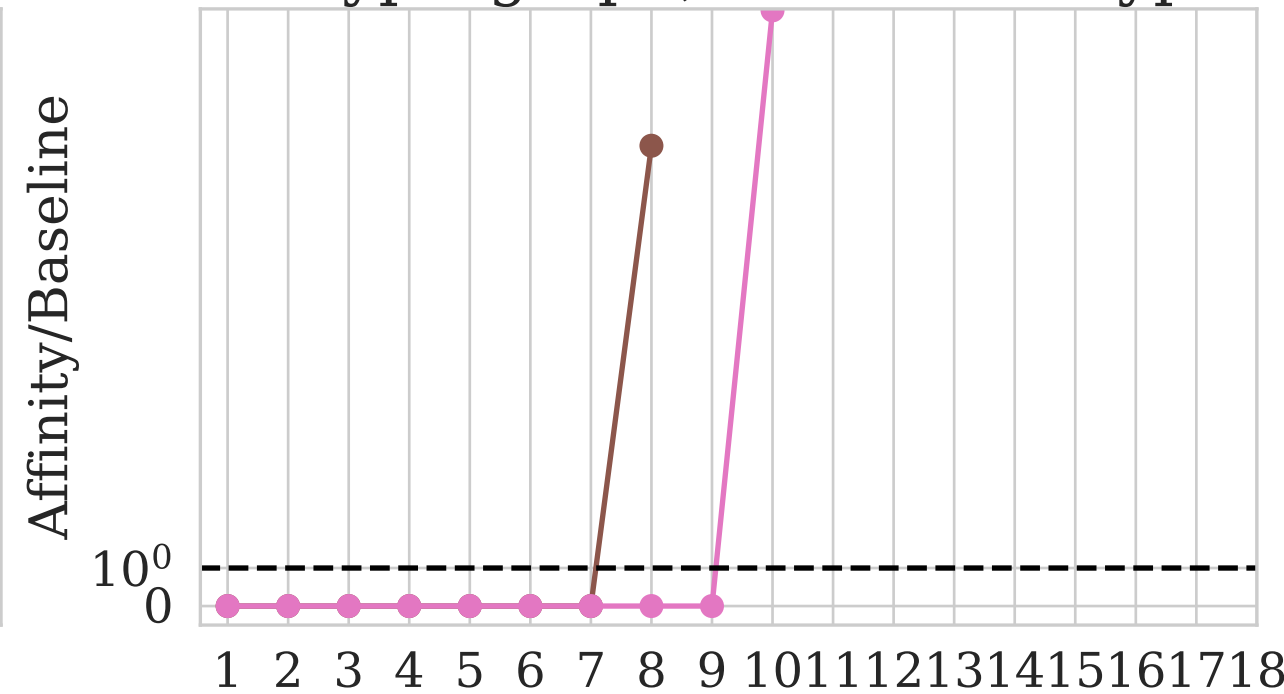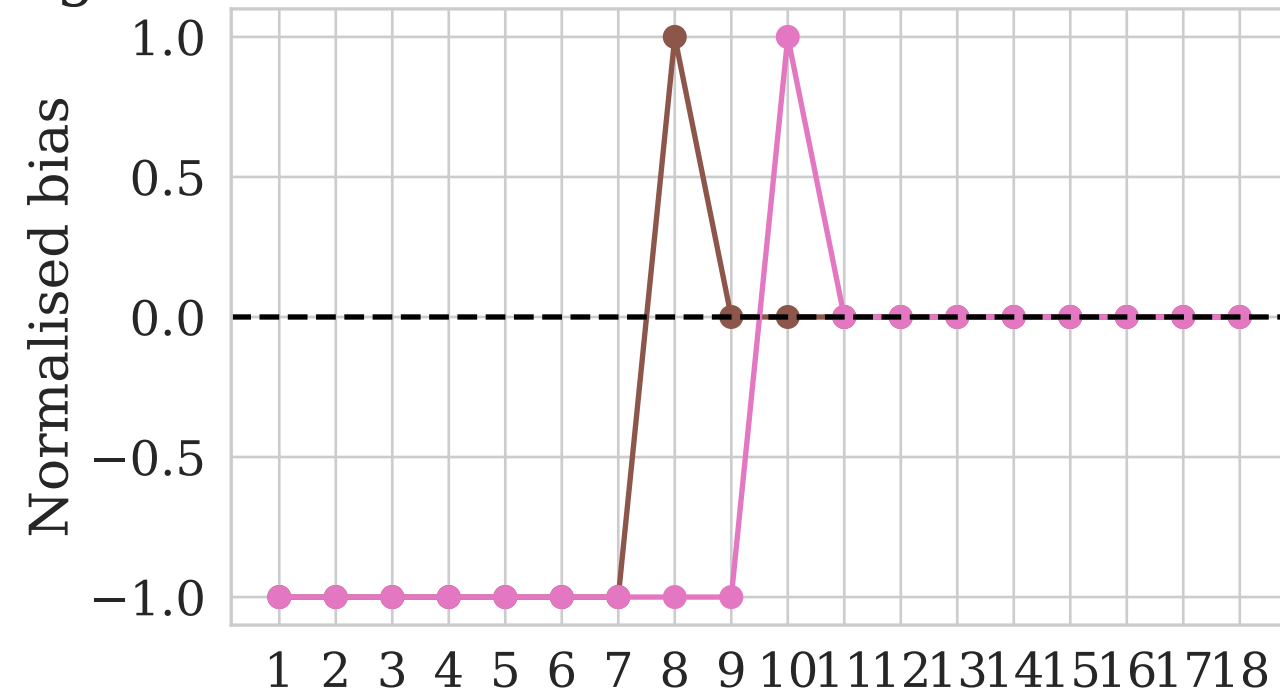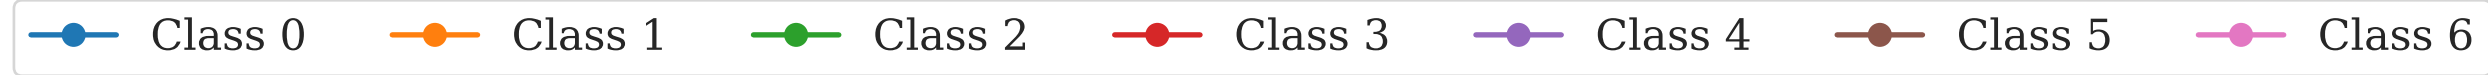

21-uniform hypergraph, number of hyperedges: 1

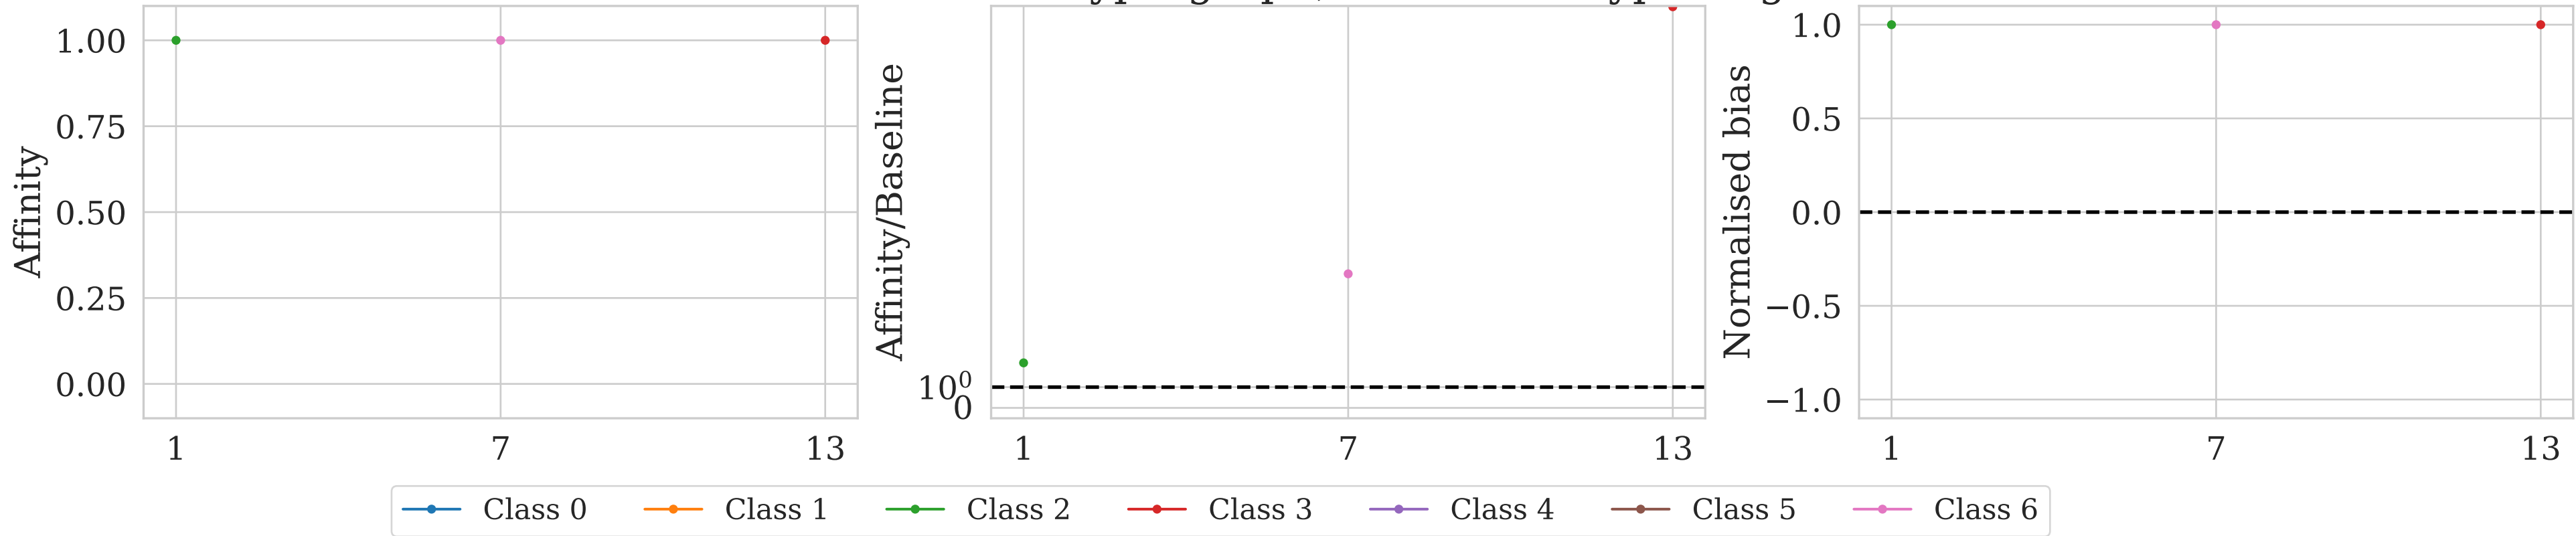

88-uniform hypergraph, number of hyperedges: 1

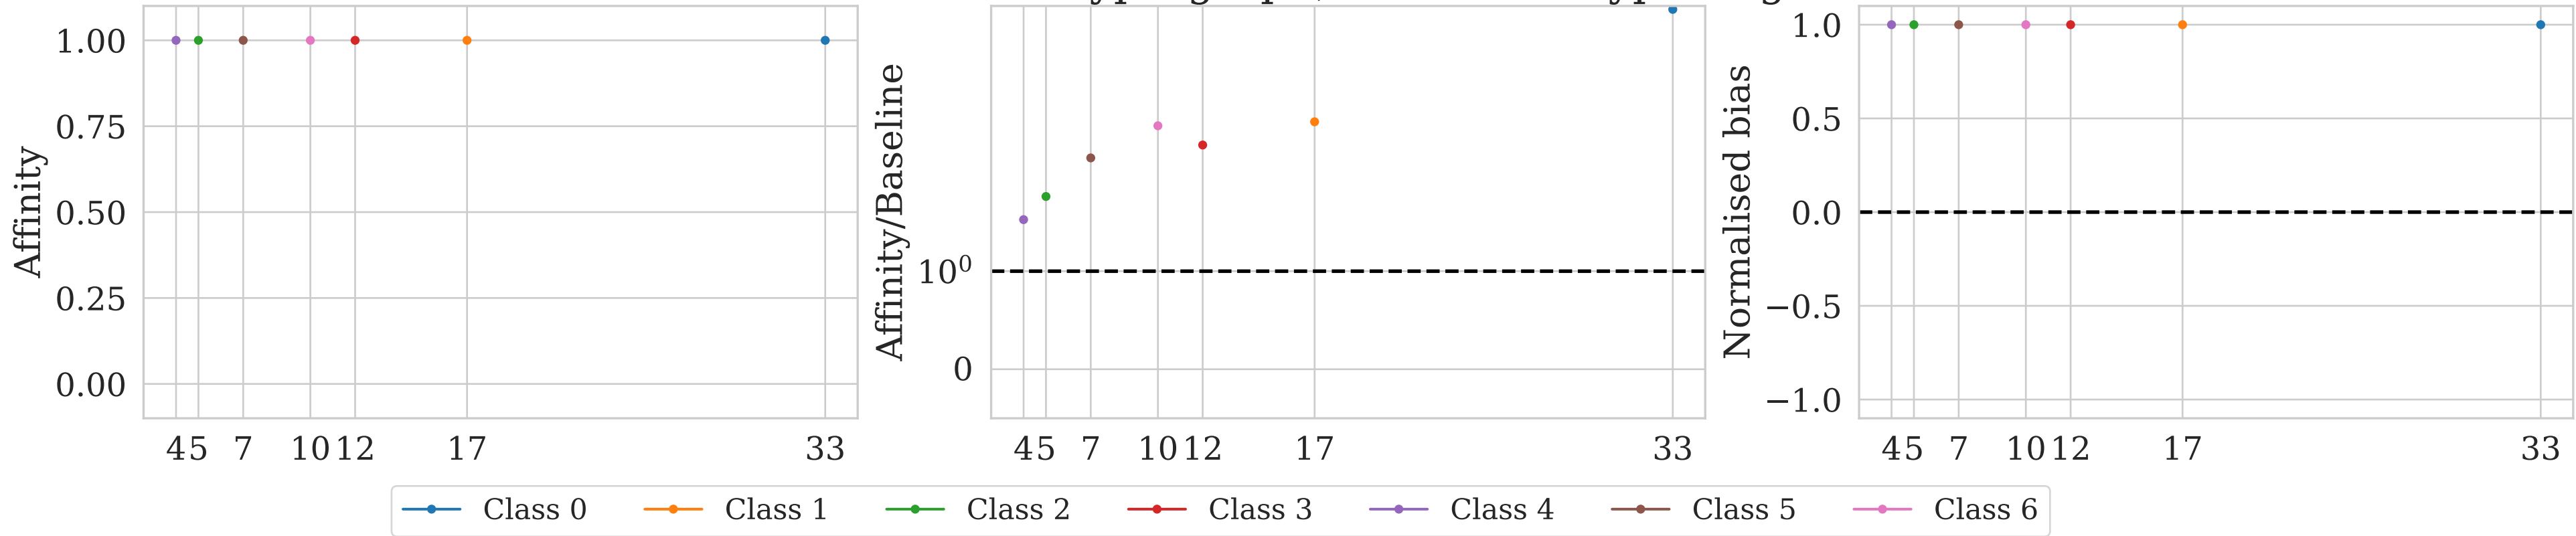

17-uniform hypergraph, number of hyperedges: 1

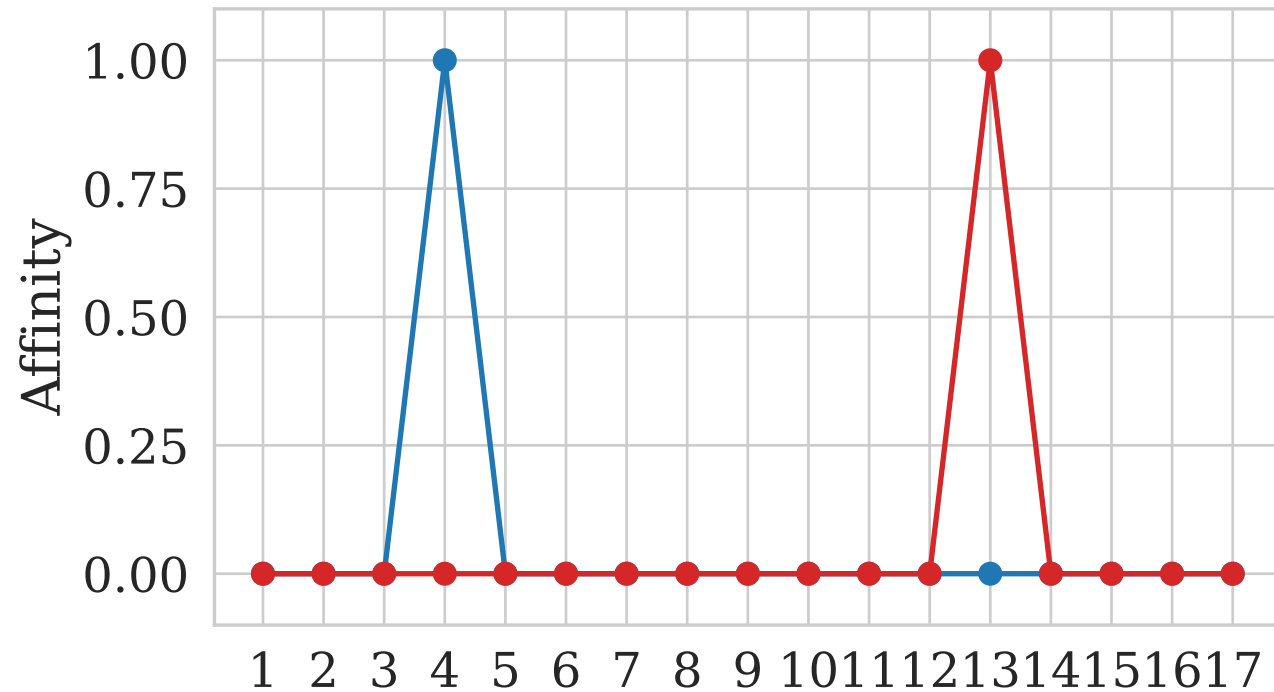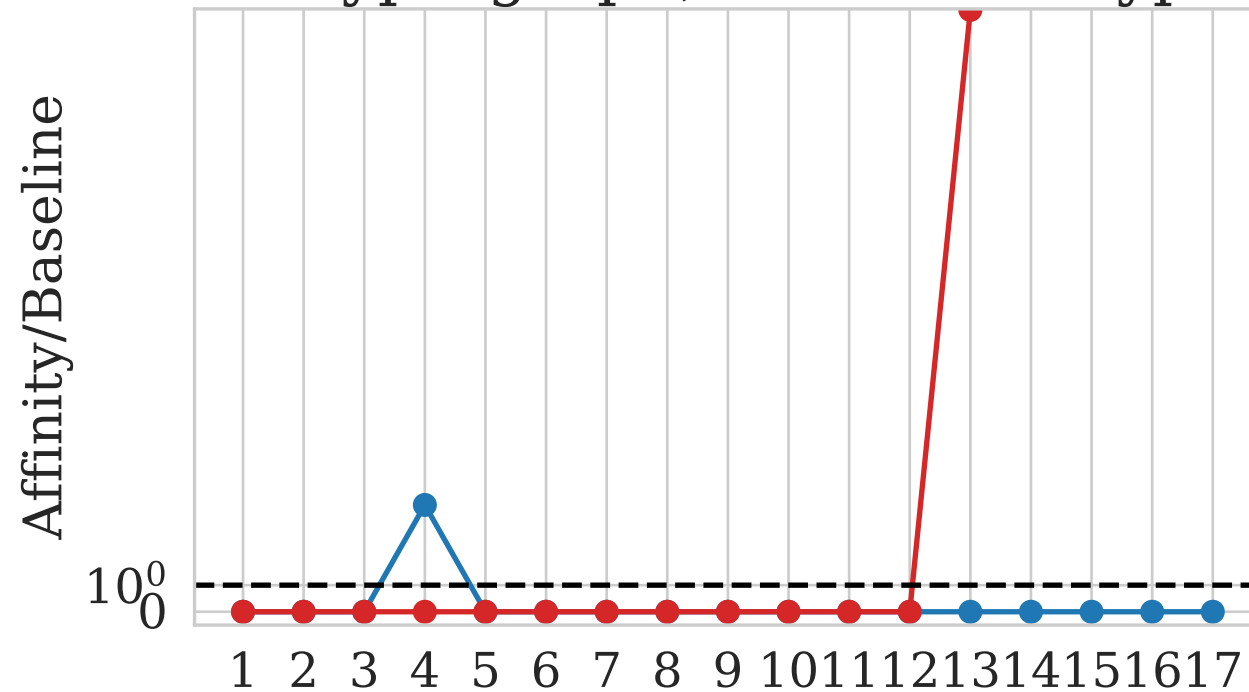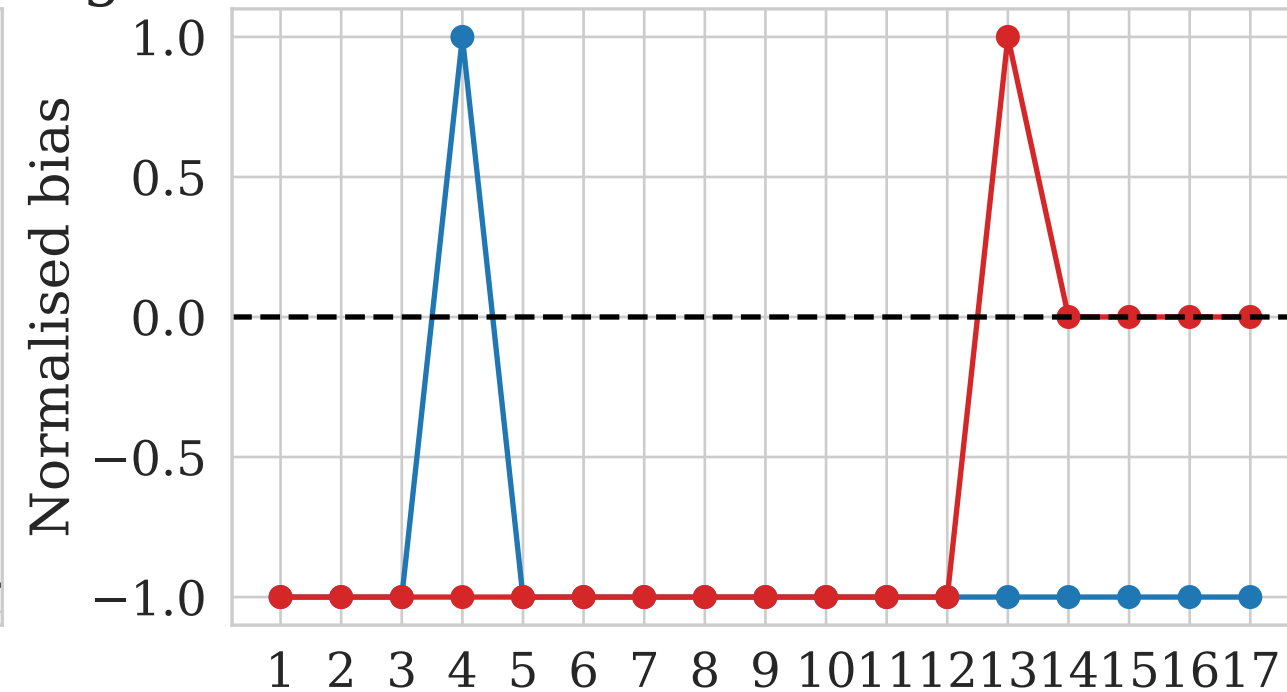

Class 0 Class 1 Class 2 Class 3 Class 4 Class 5 Class 6

5-uniform hypergraph, number of hyperedges: 1

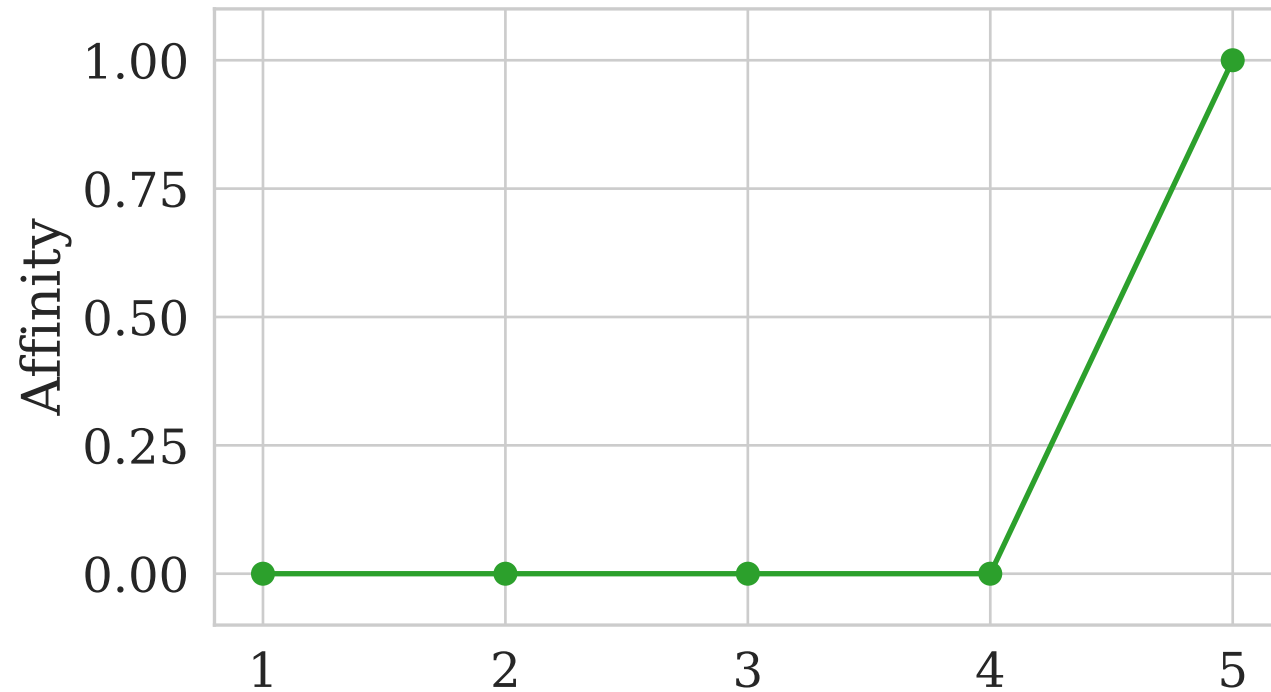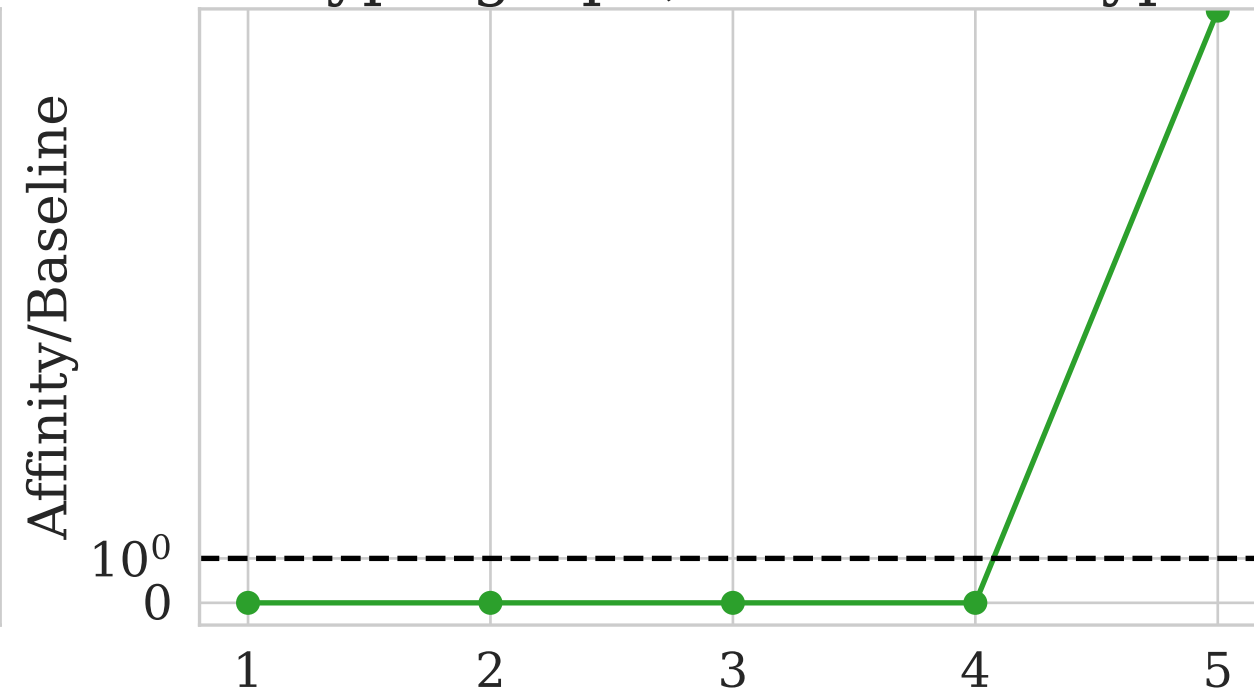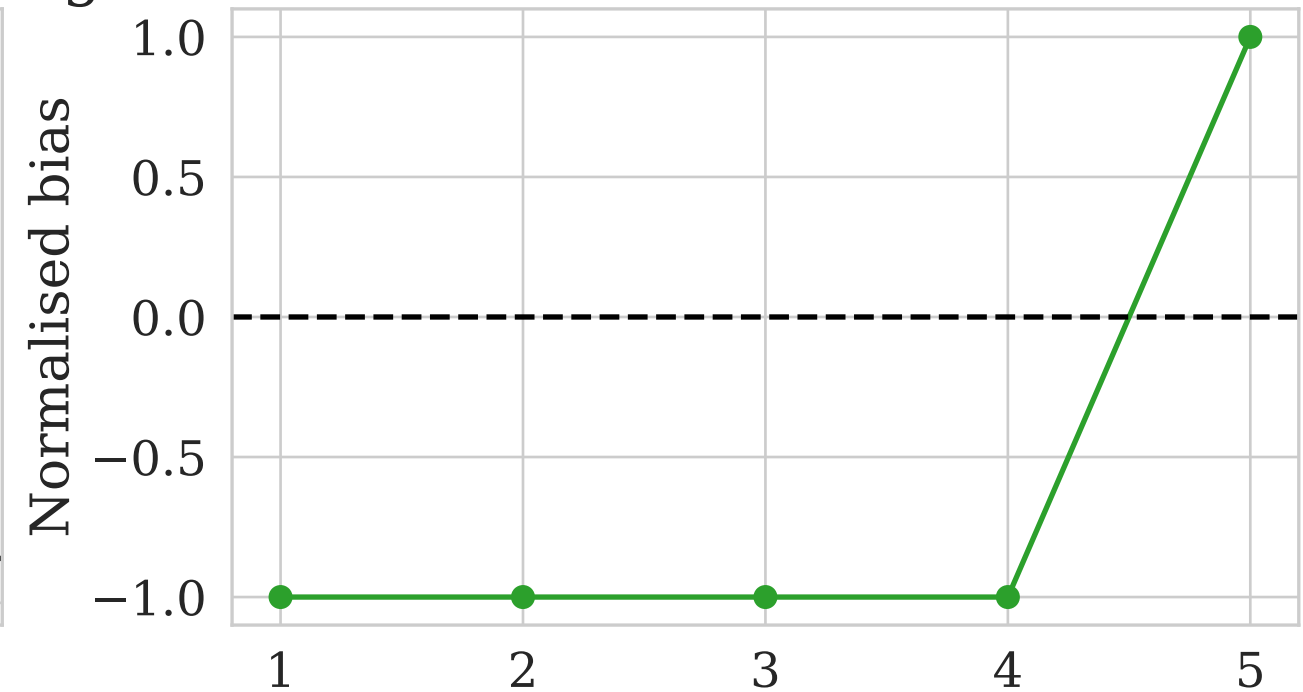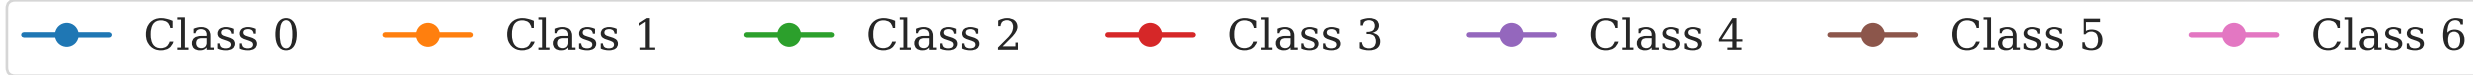



4-uniform hypergraph, number of hyperedges: 1

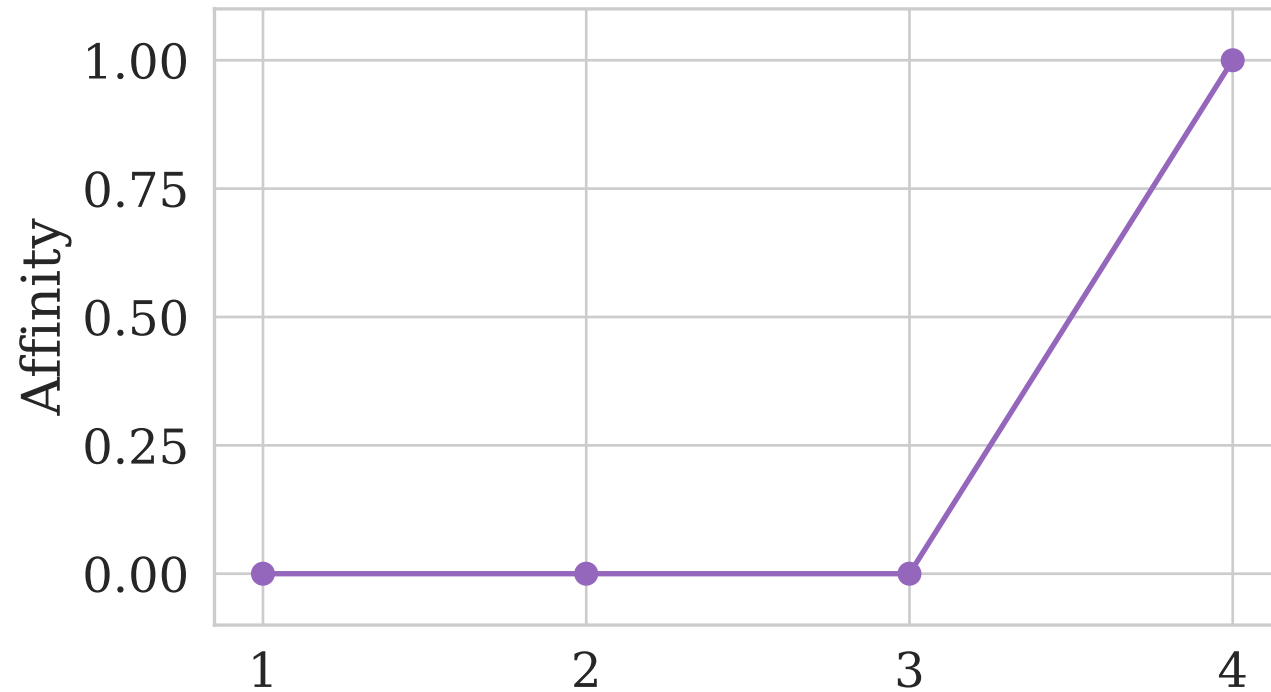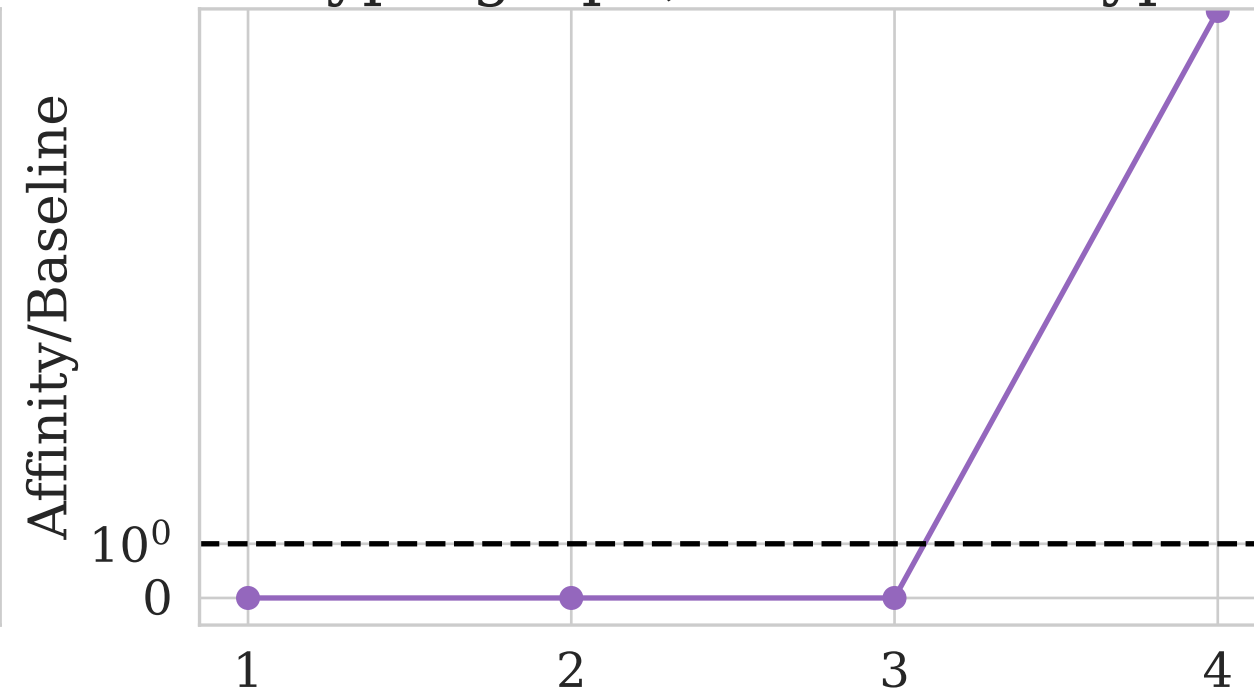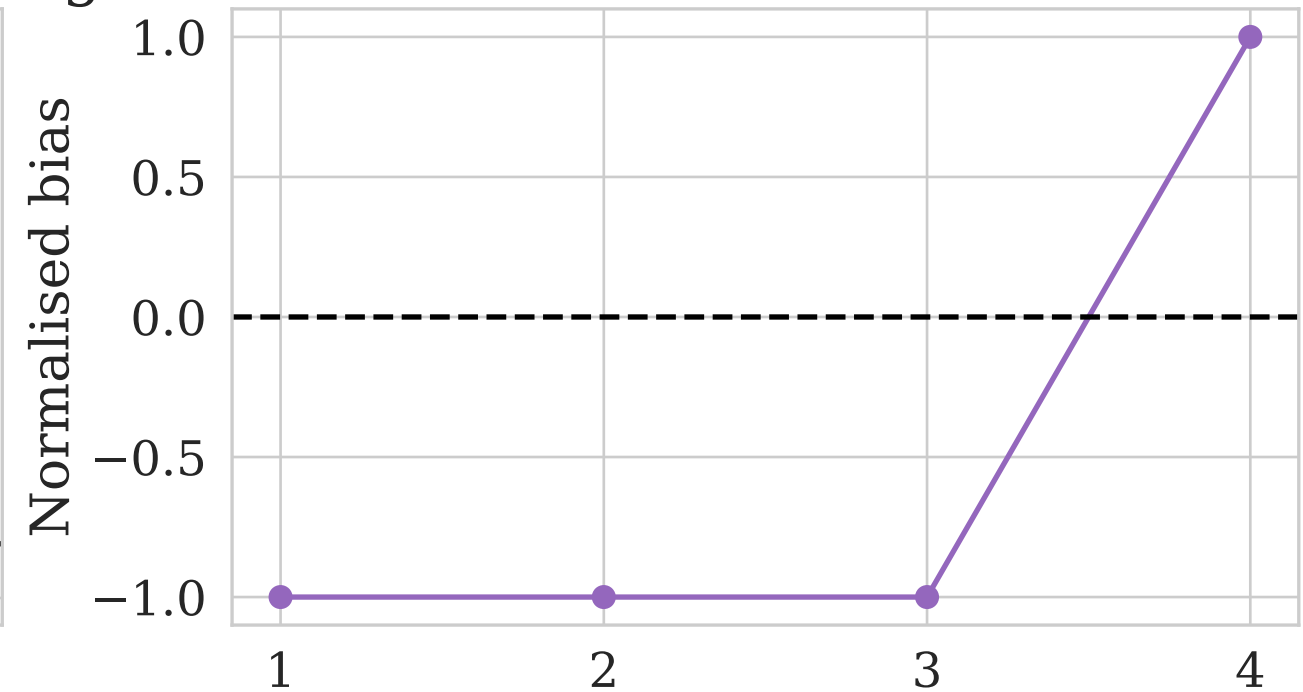

2-uniform hypergraph, number of hyperedges: 1

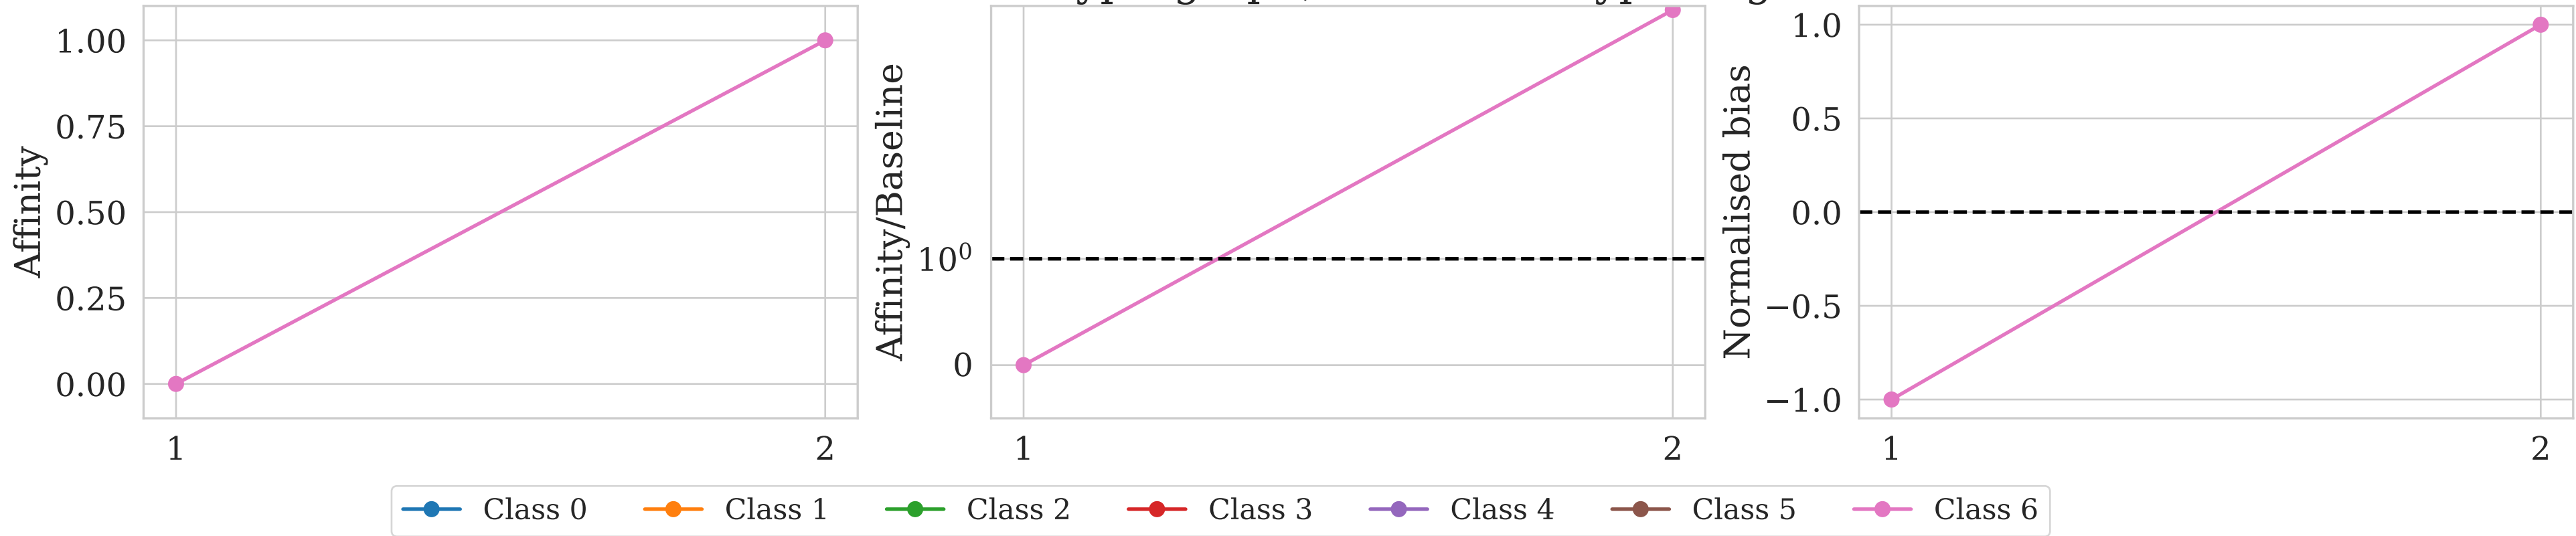

40-uniform hypergraph, number of hyperedges: 1

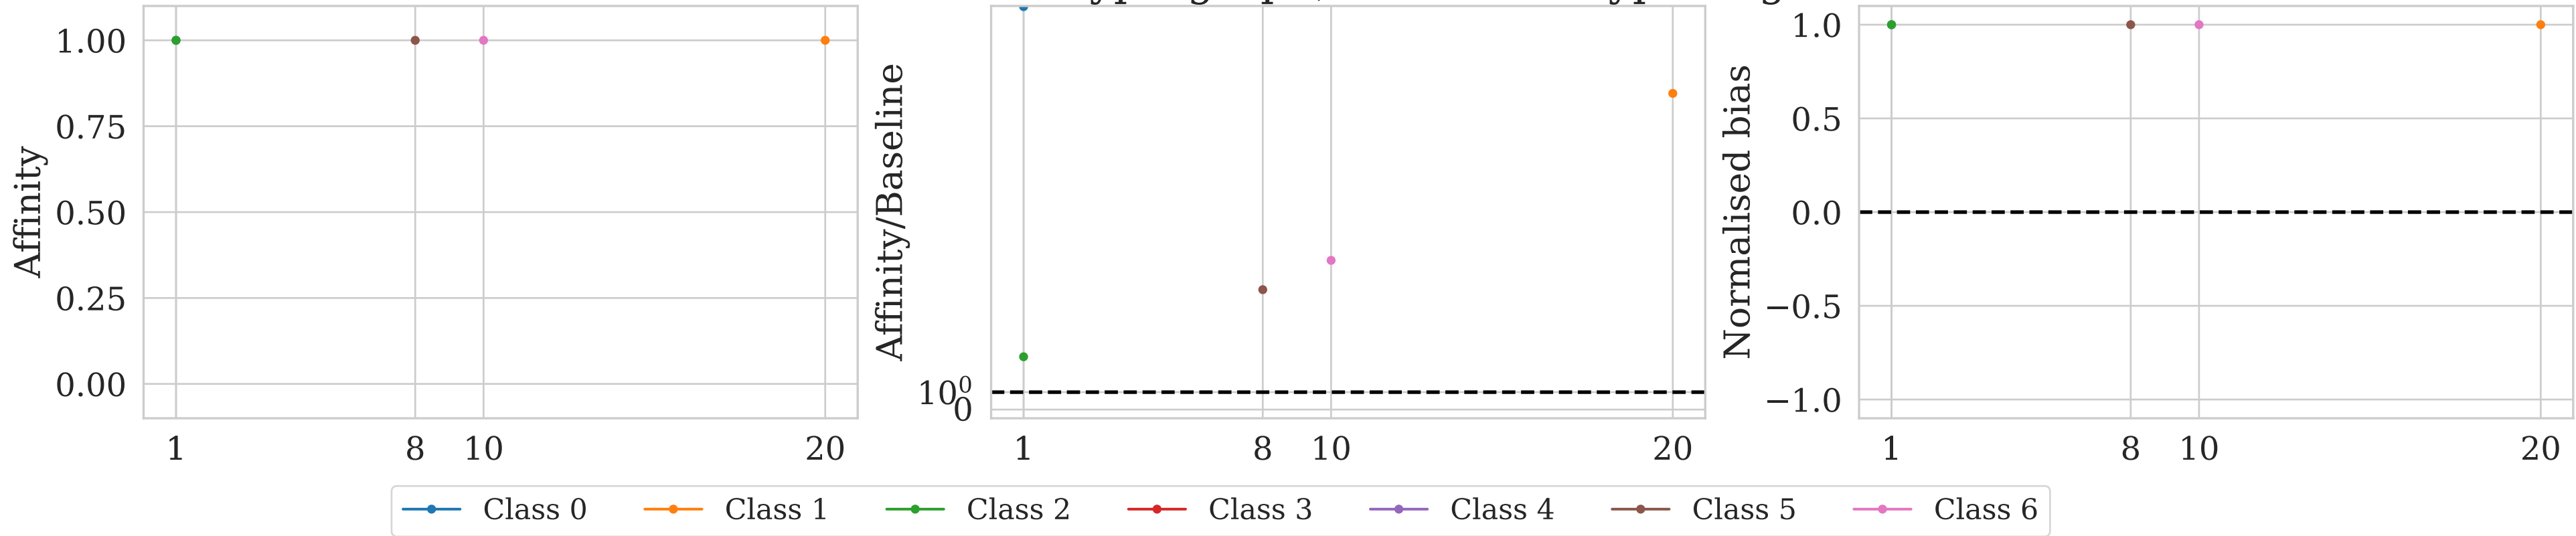

93-uniform hypergraph, number of hyperedges: 1

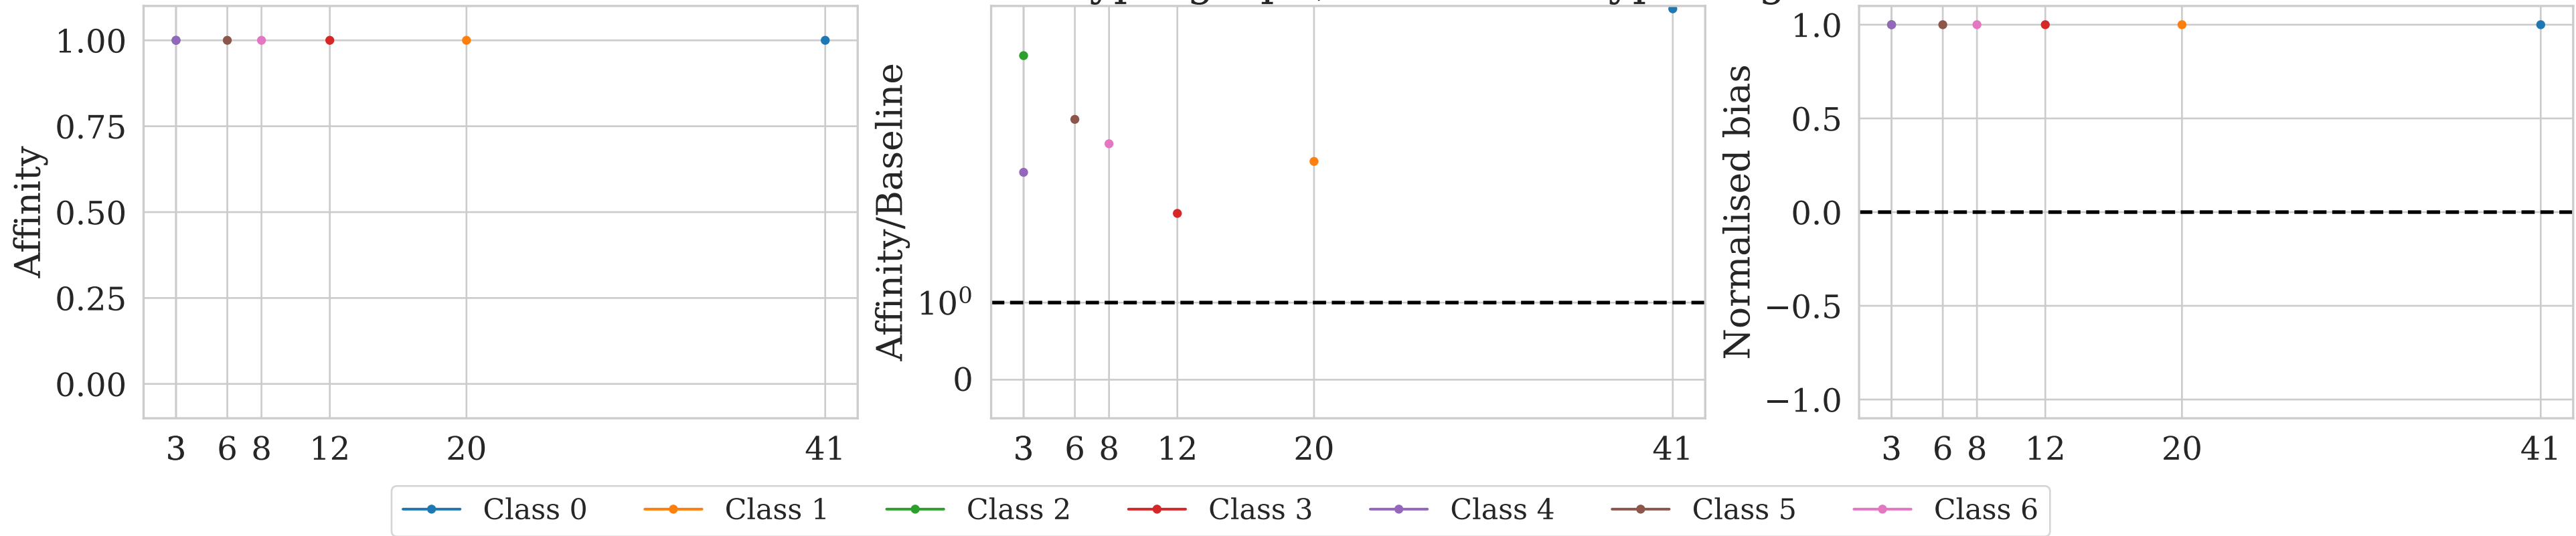

42-uniform hypergraph, number of hyperedges: 1

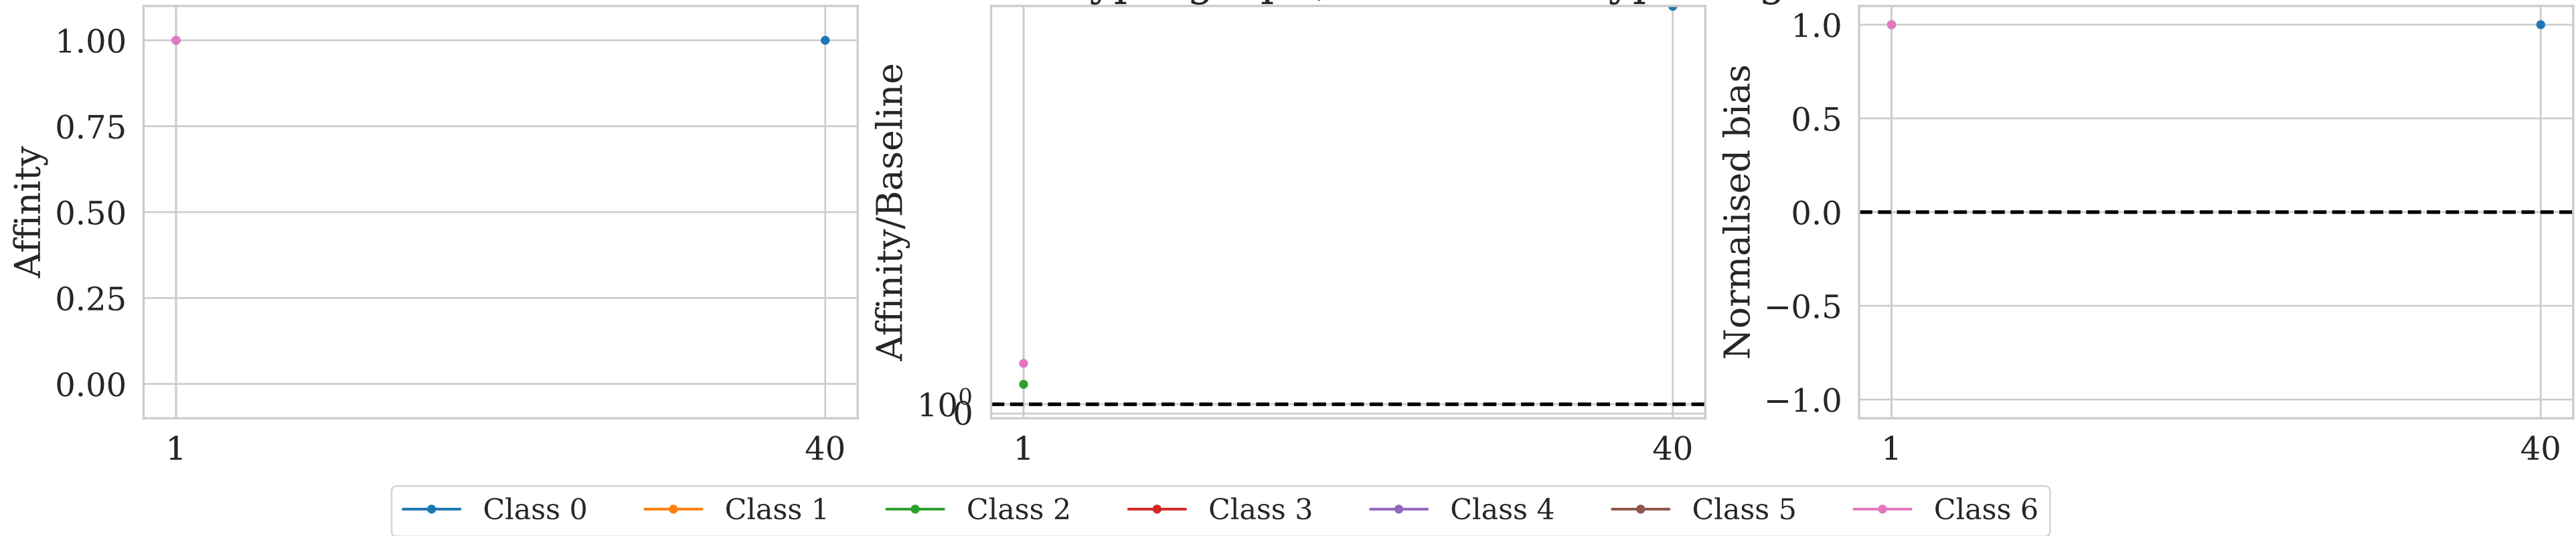

43-uniform hypergraph, number of hyperedges: 1

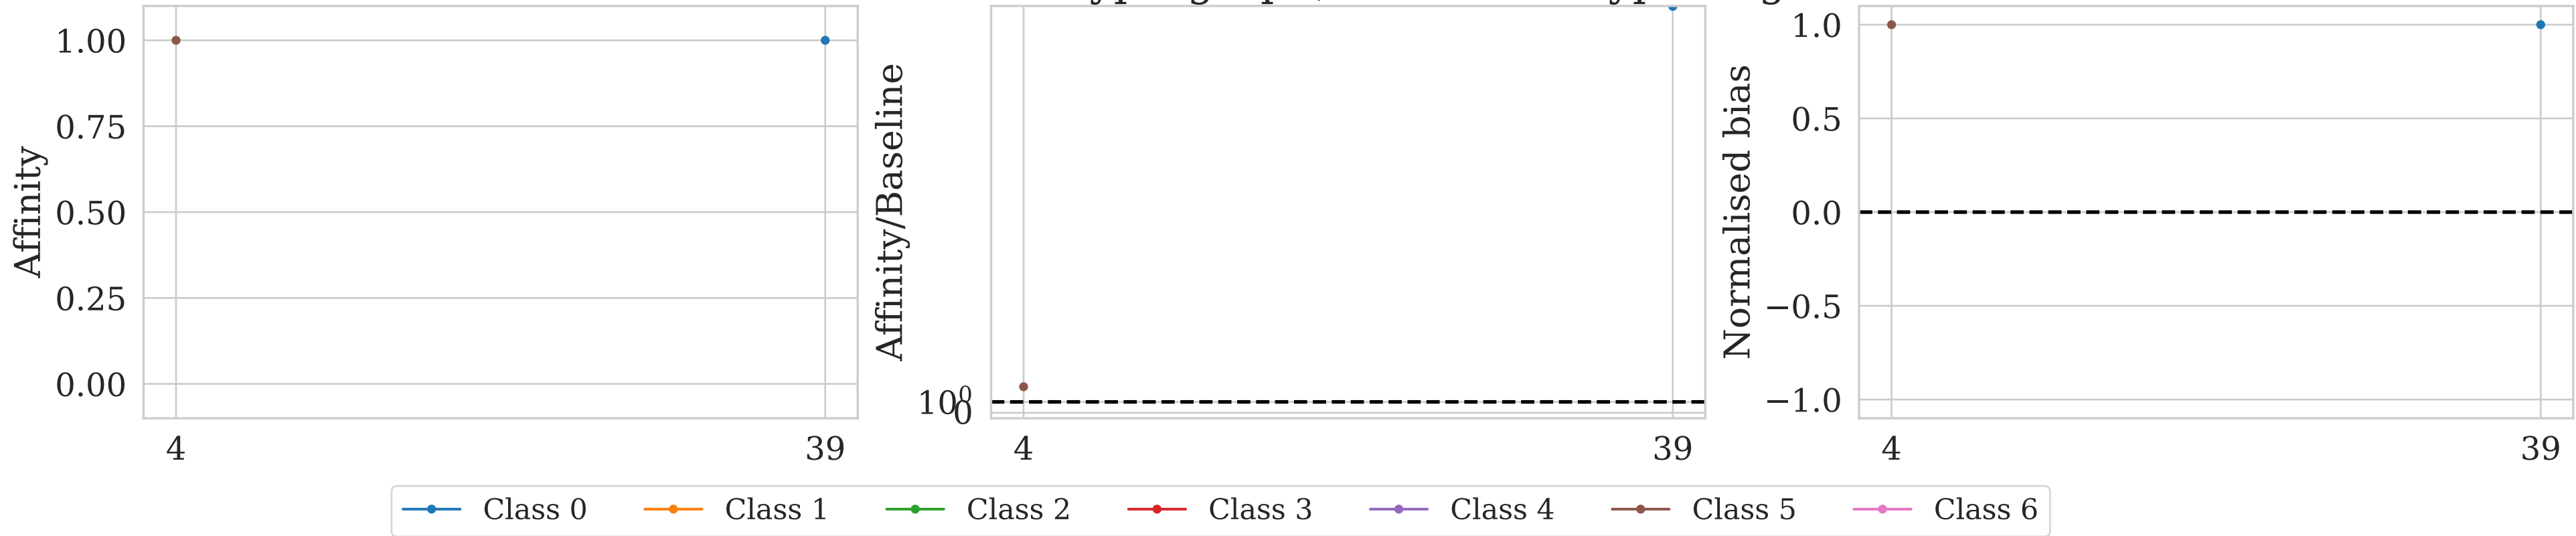

84-uniform hypergraph, number of hyperedges: 1

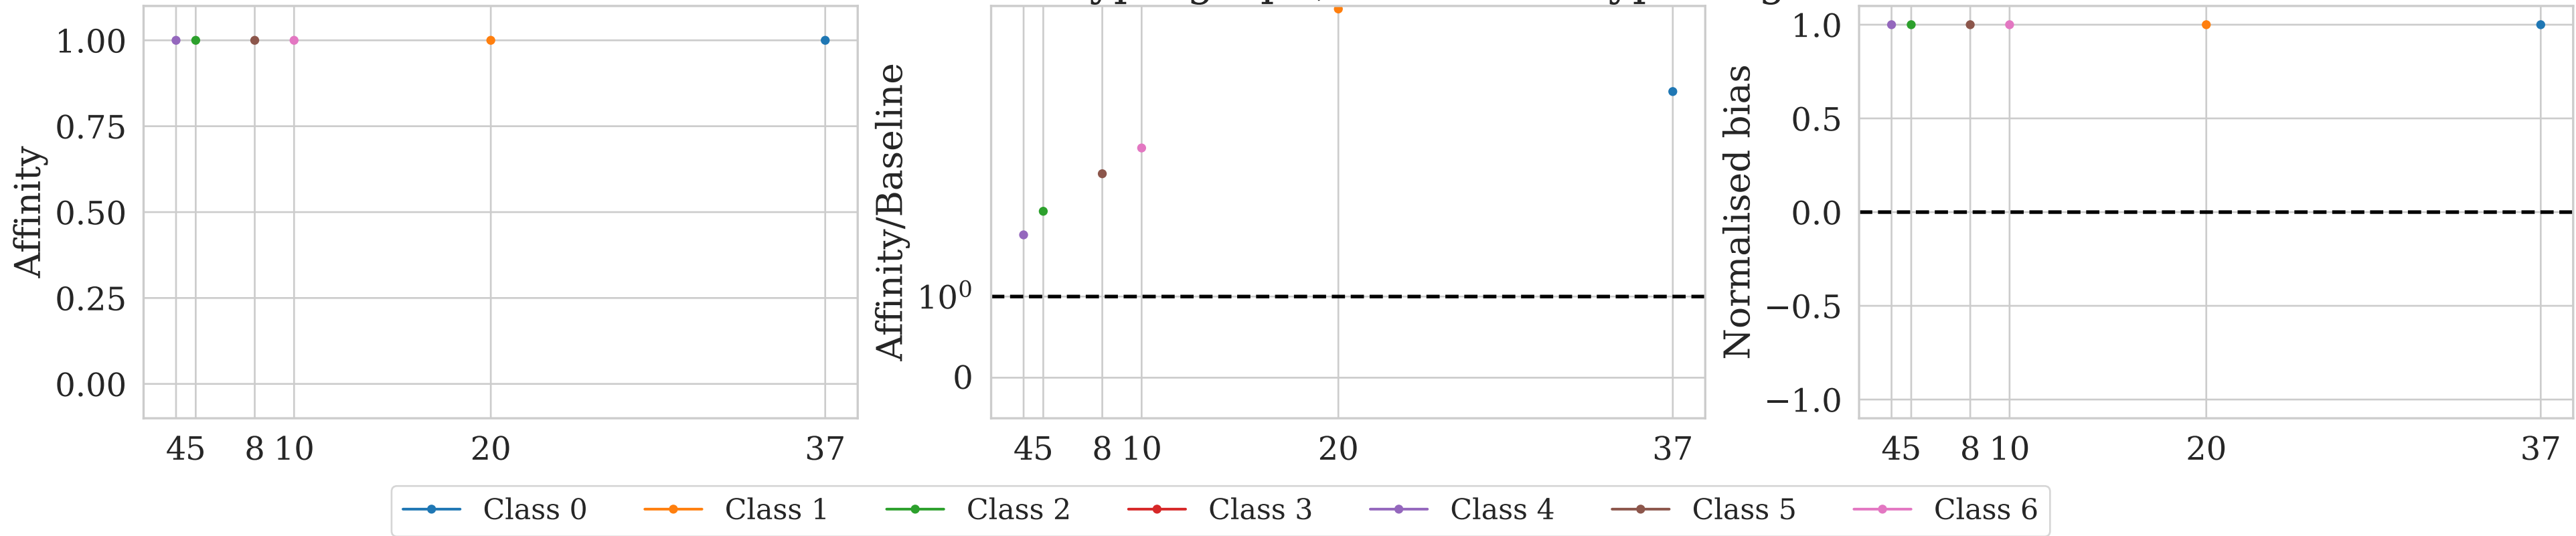

83-uniform hypergraph, number of hyperedges: 1

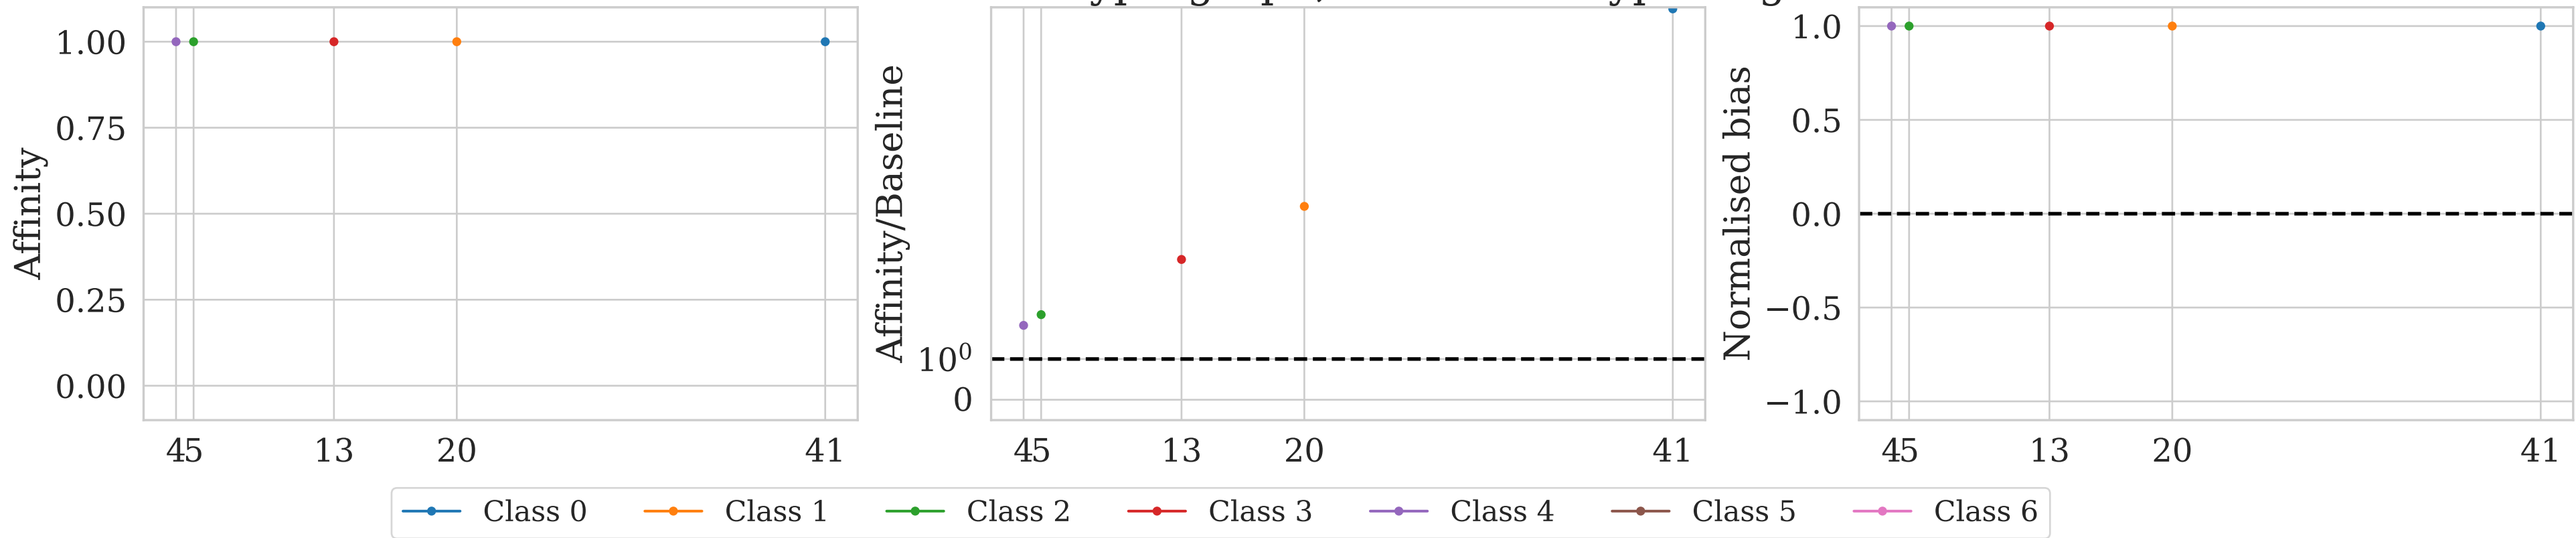



81-uniform hypergraph, number of hyperedges: 1

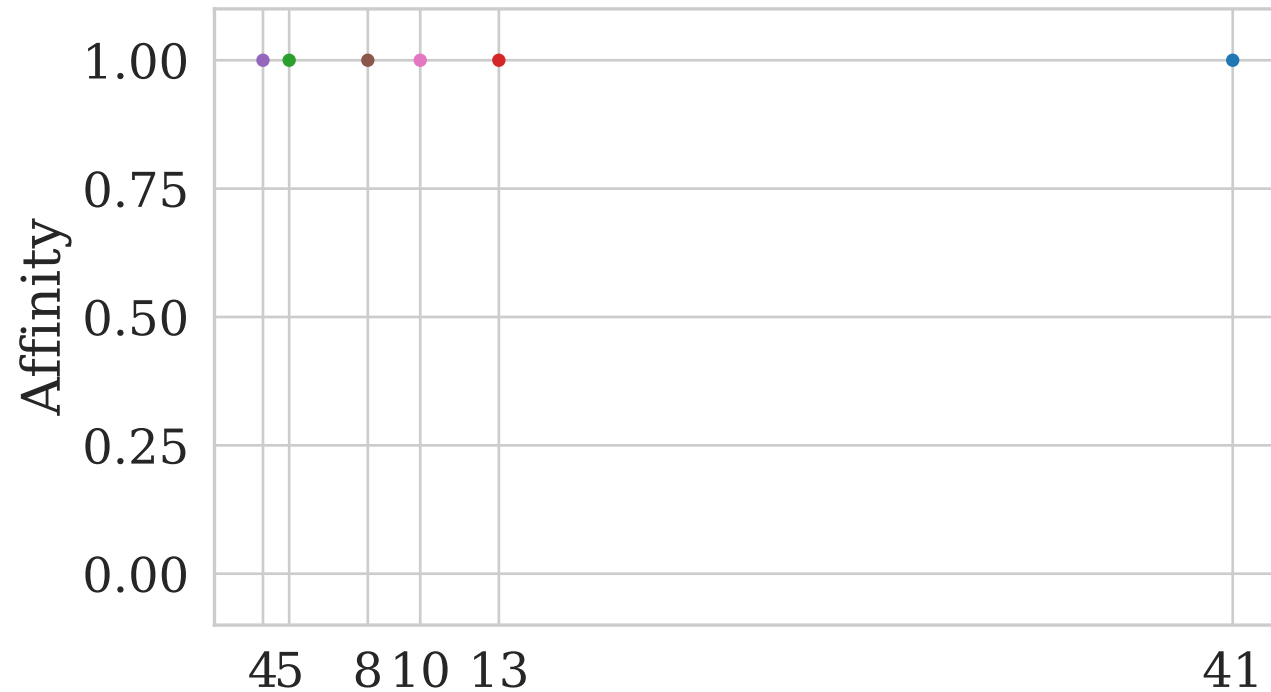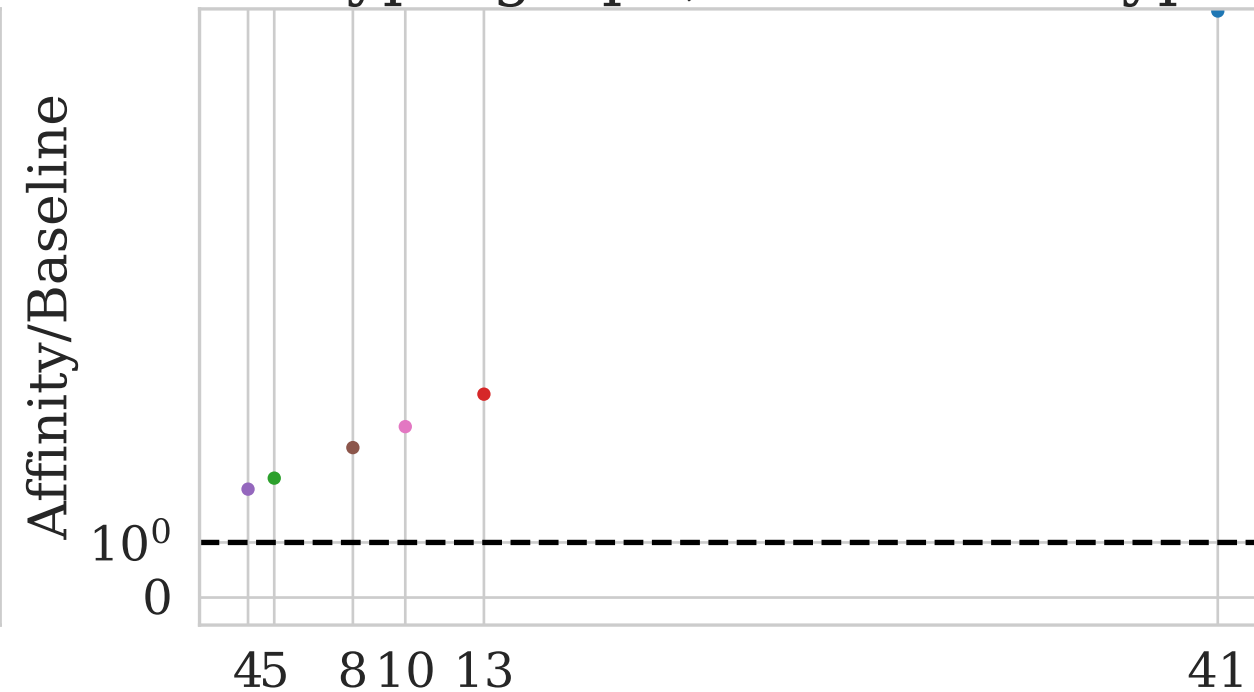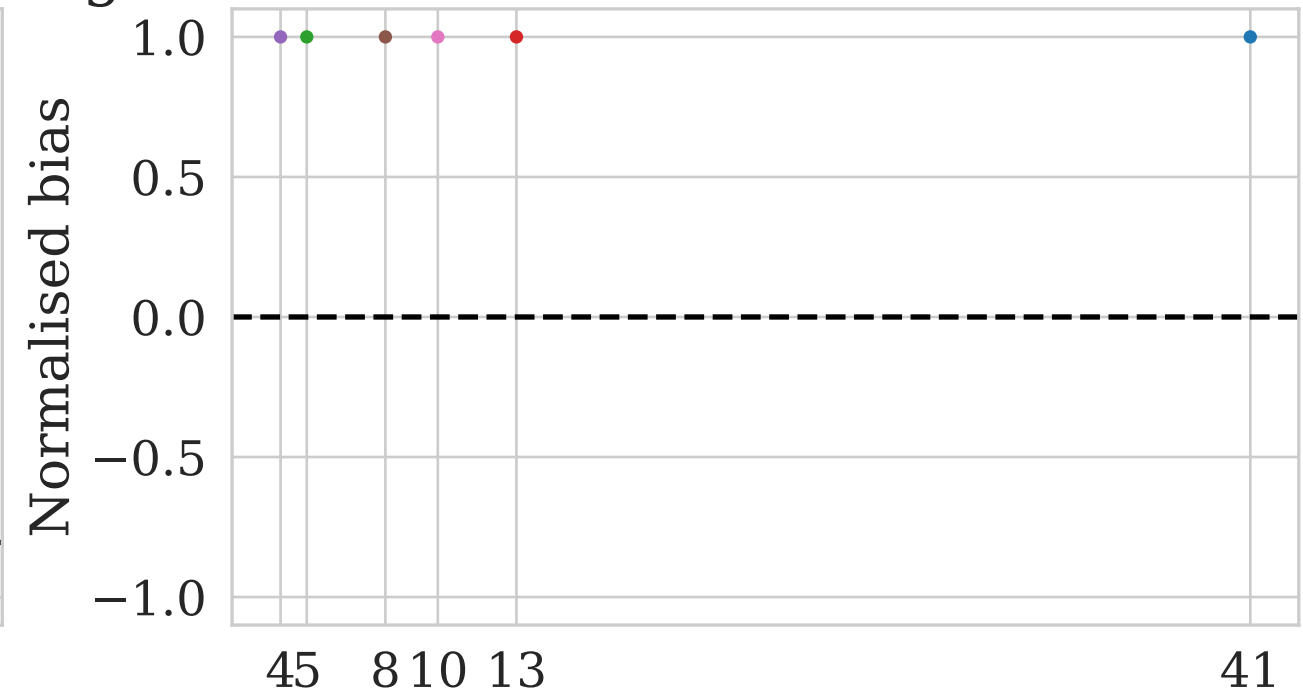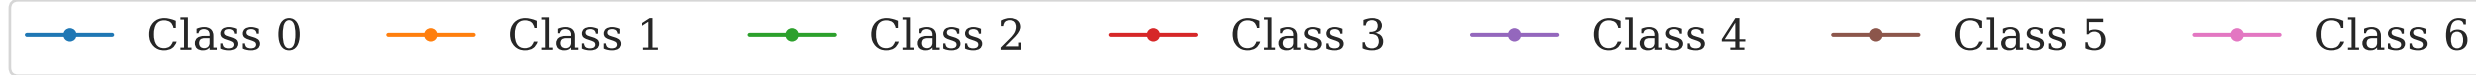

80-uniform hypergraph, number of hyperedges: 1

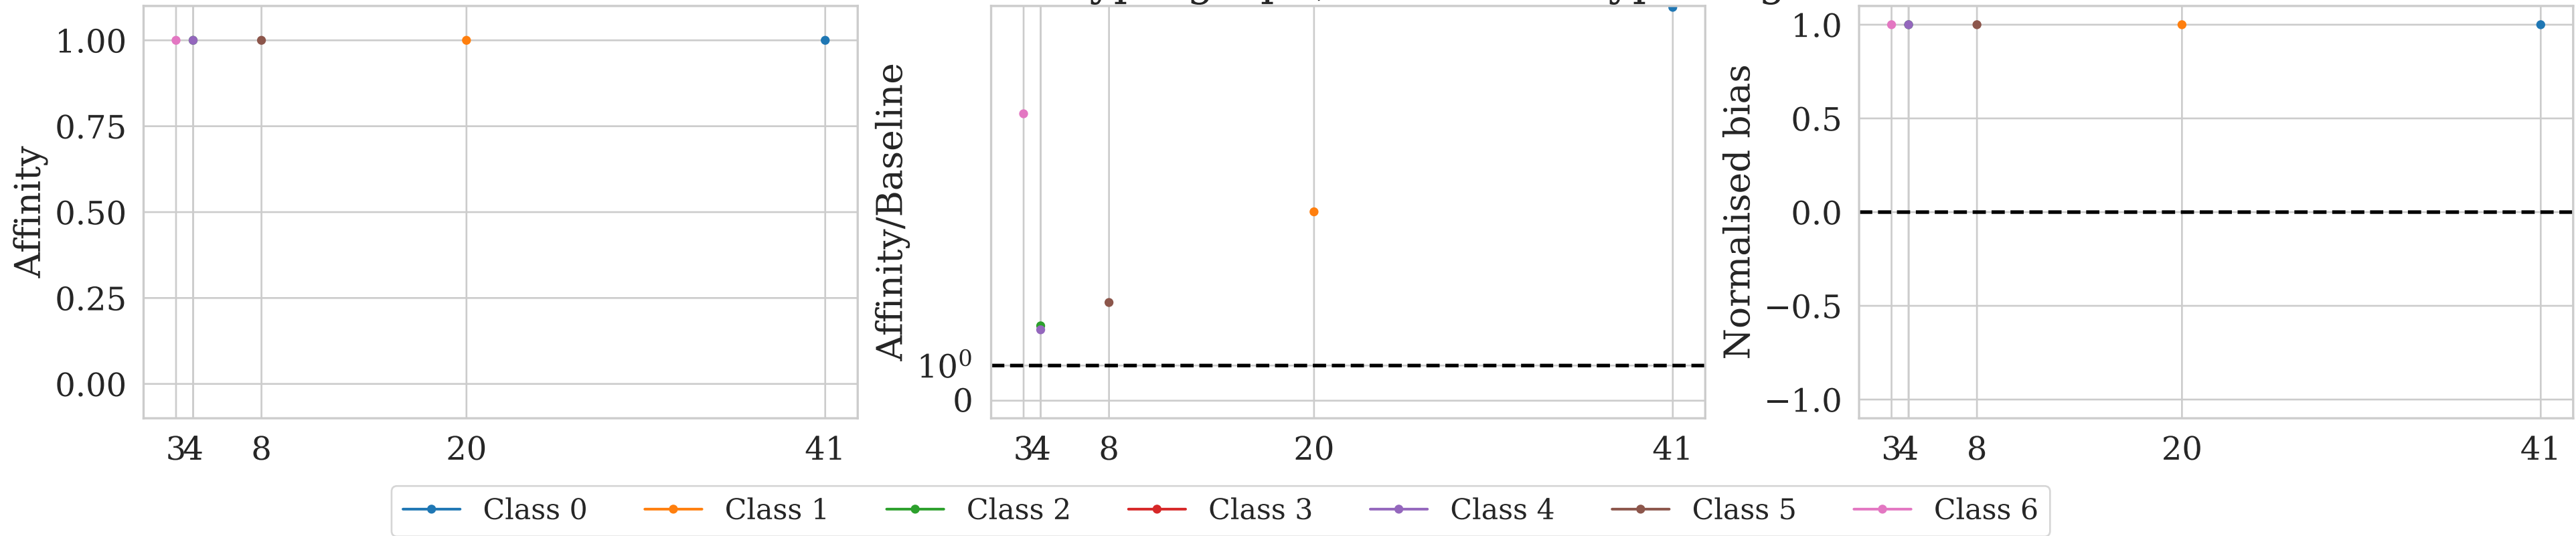

77-uniform hypergraph, number of hyperedges: 1

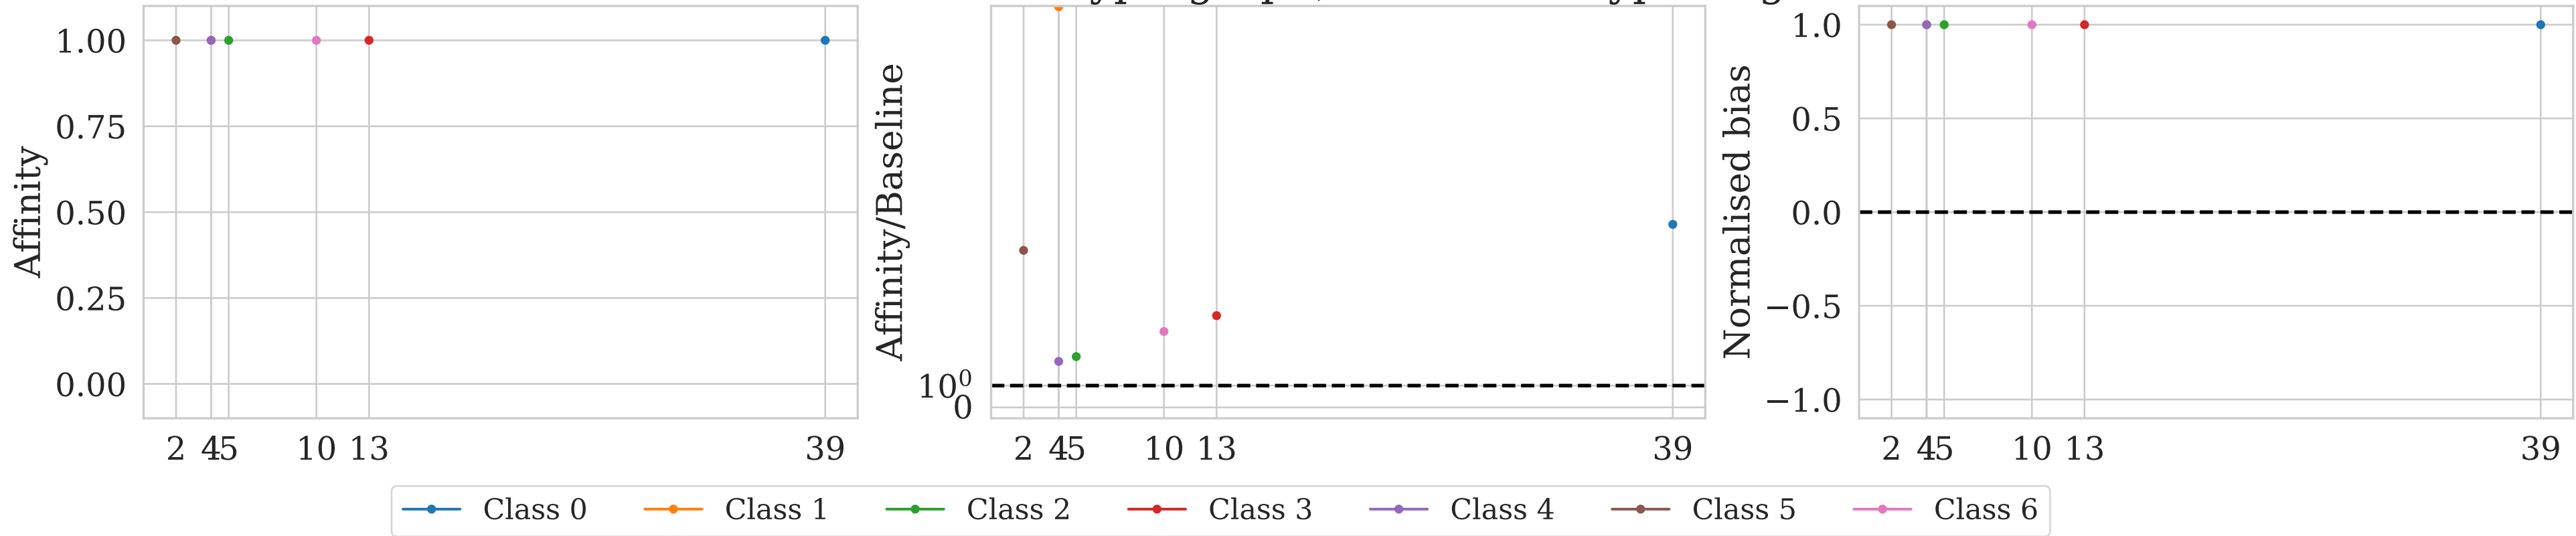

75-uniform hypergraph, number of hyperedges: 1

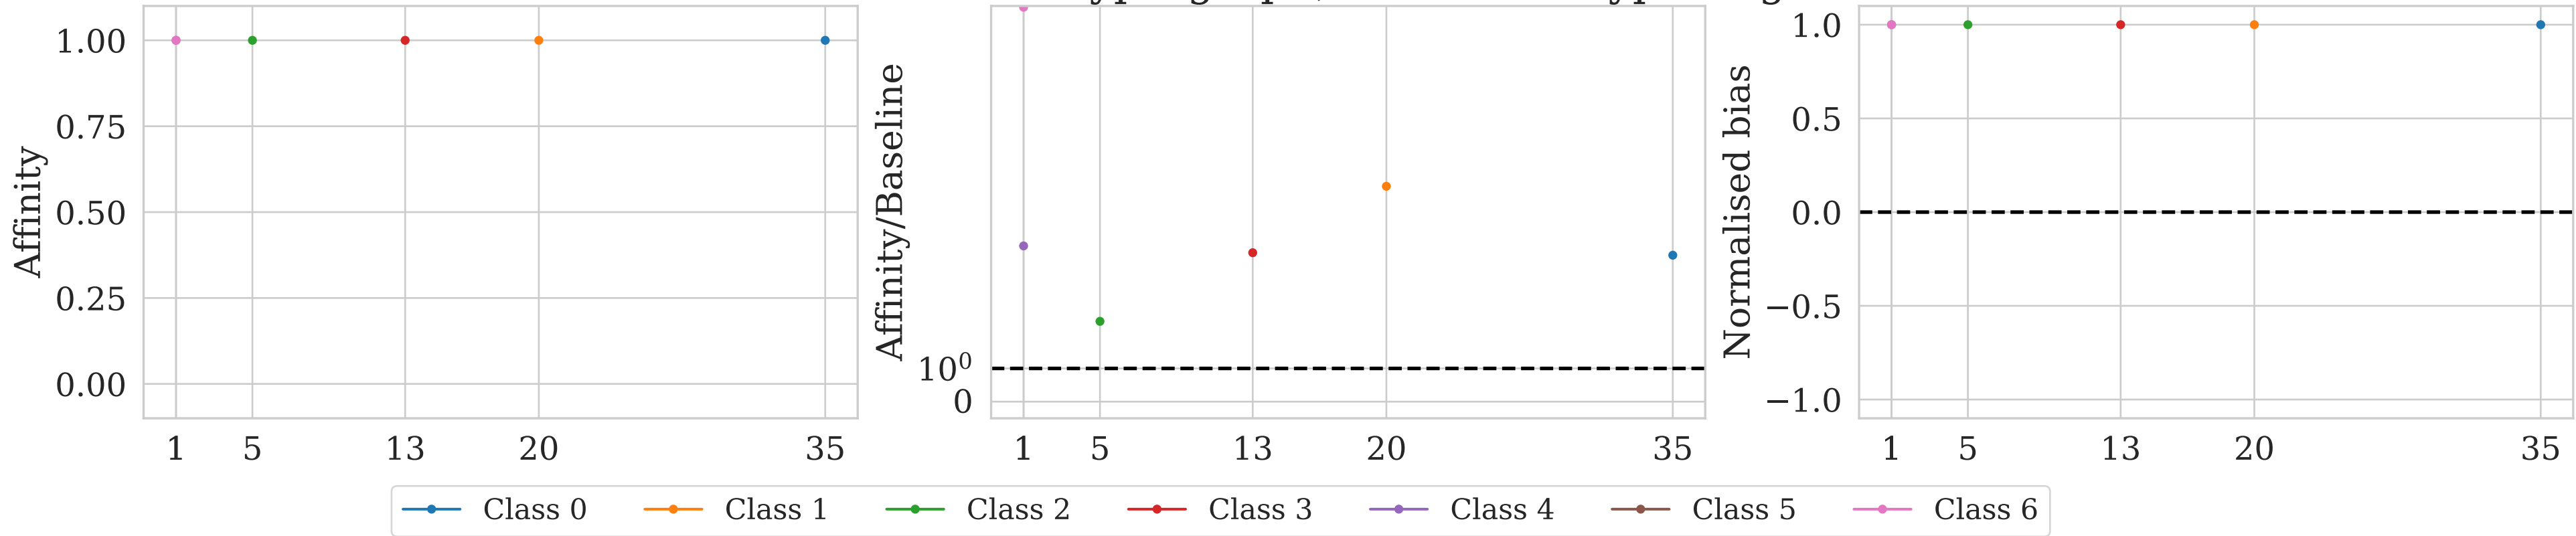

65-uniform hypergraph, number of hyperedges: 1

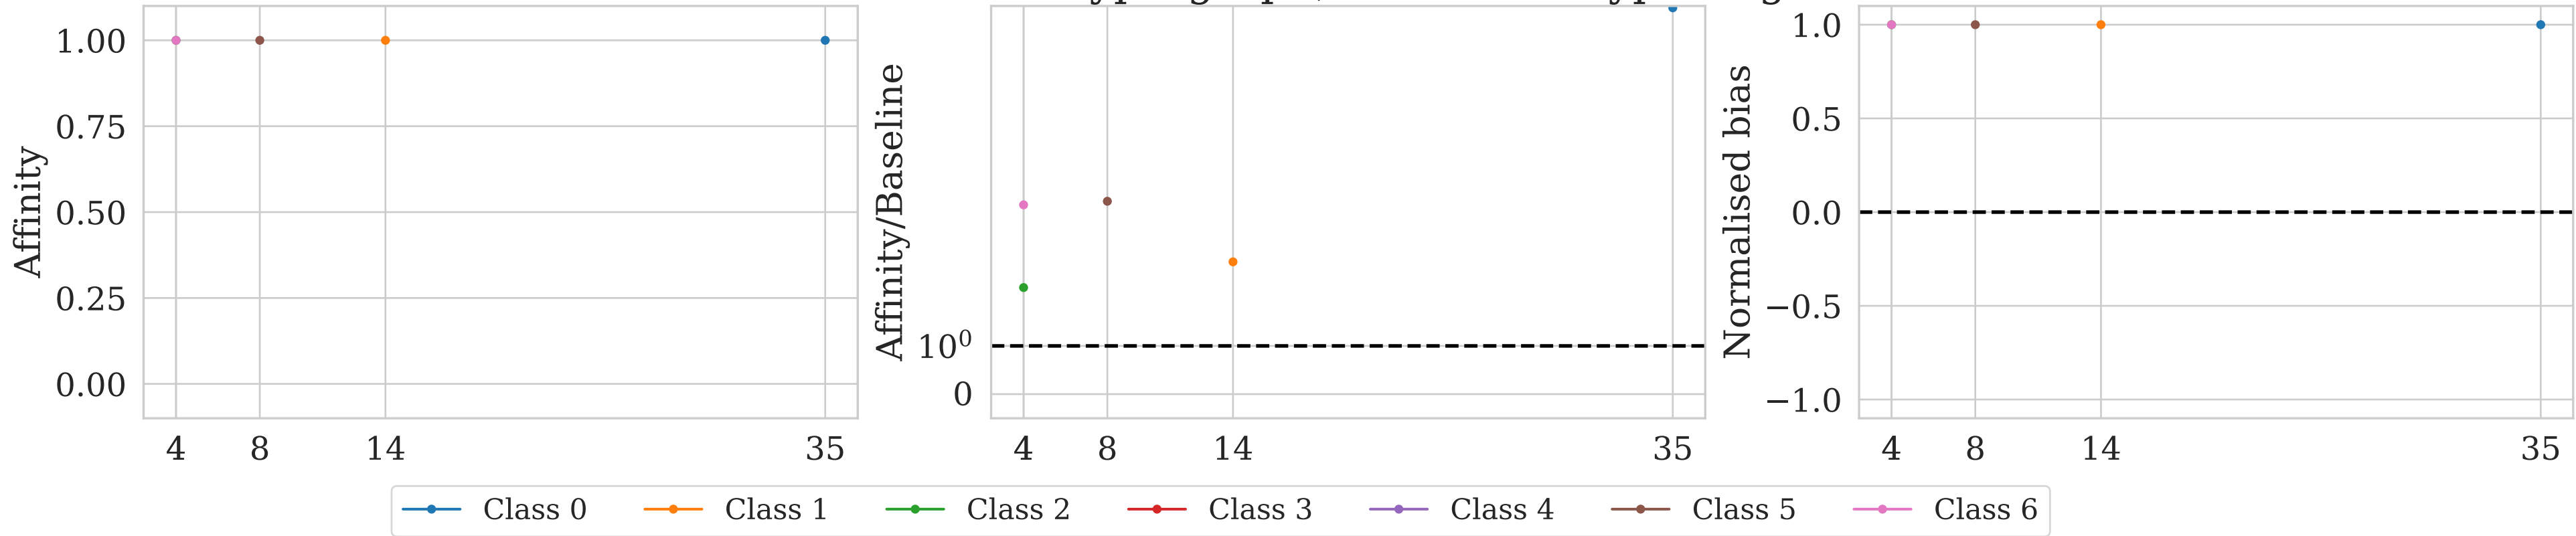

61-uniform hypergraph, number of hyperedges: 1

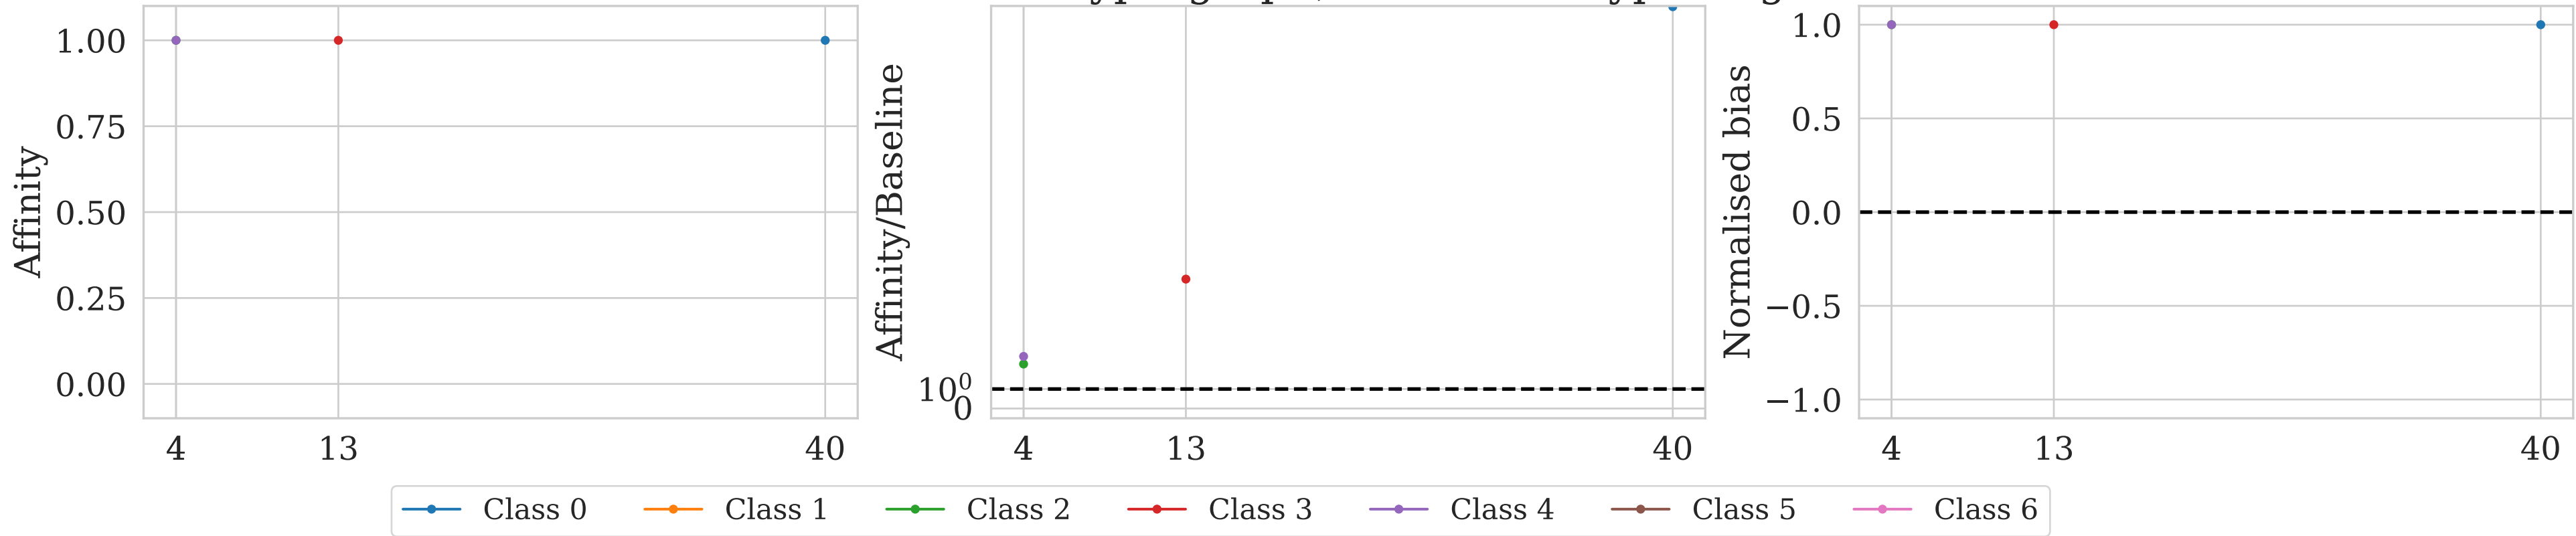

60-uniform hypergraph, number of hyperedges: 1

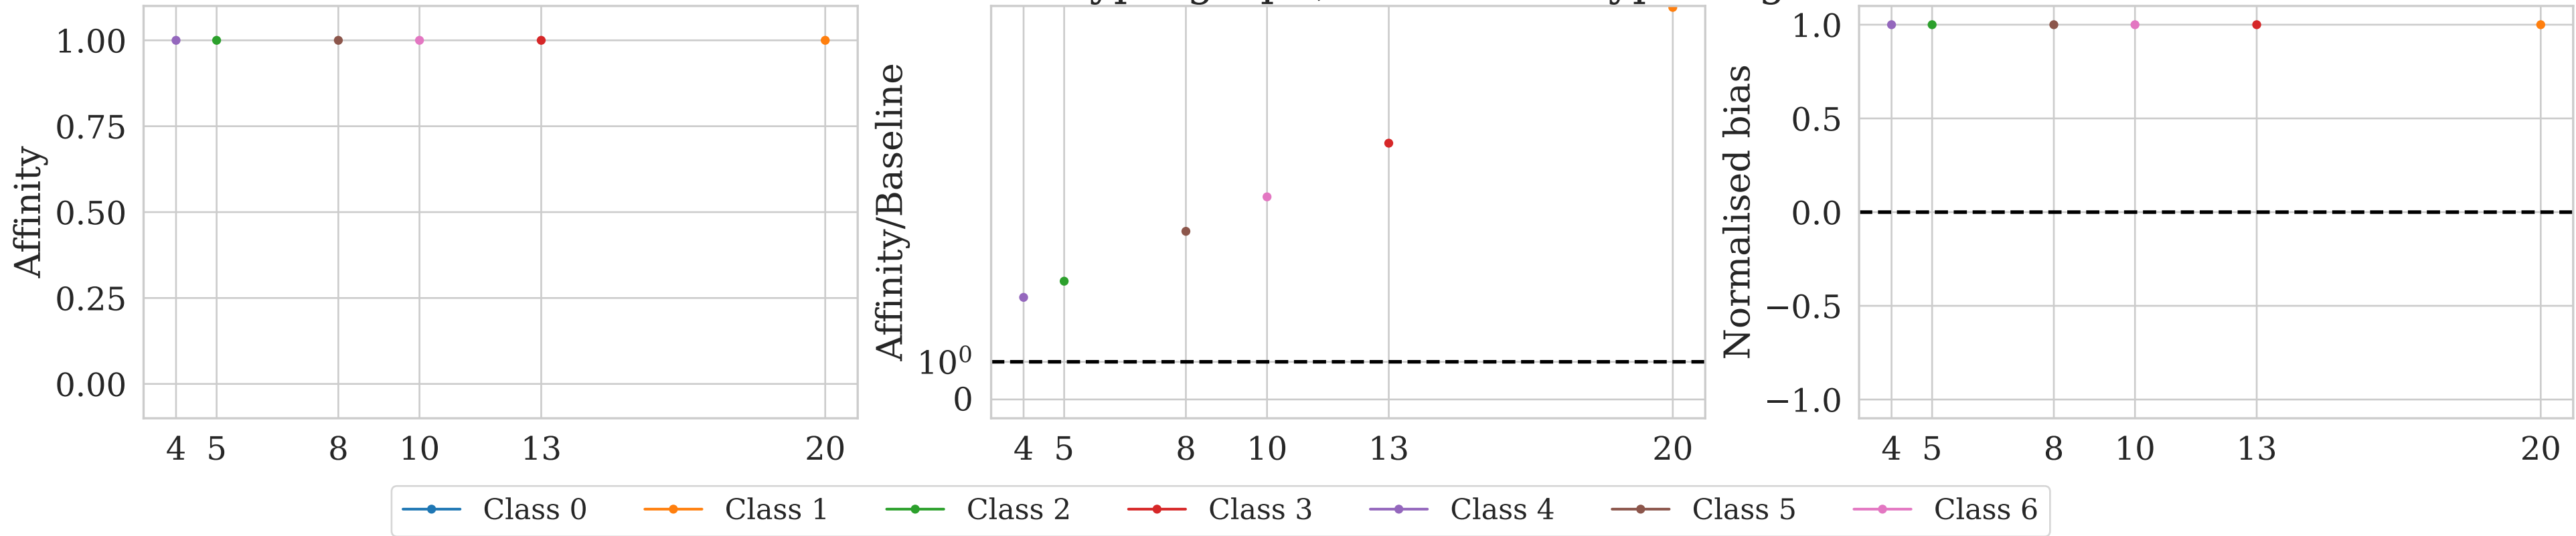

59-uniform hypergraph, number of hyperedges: 1

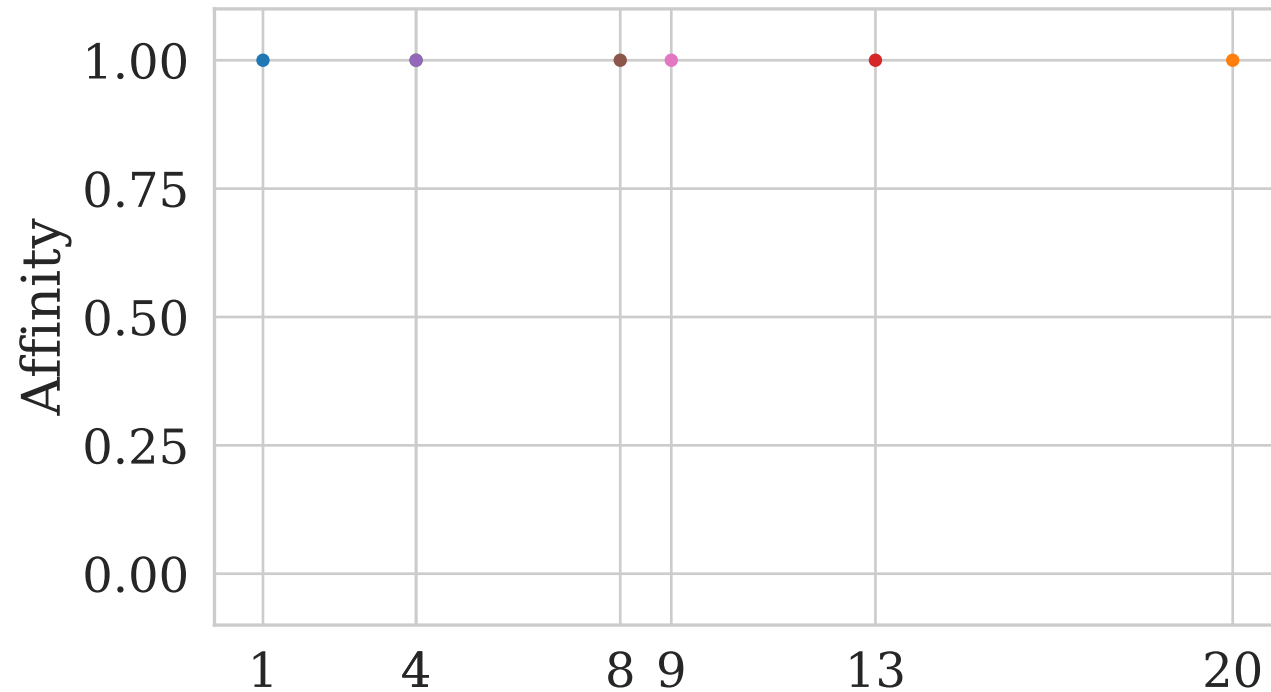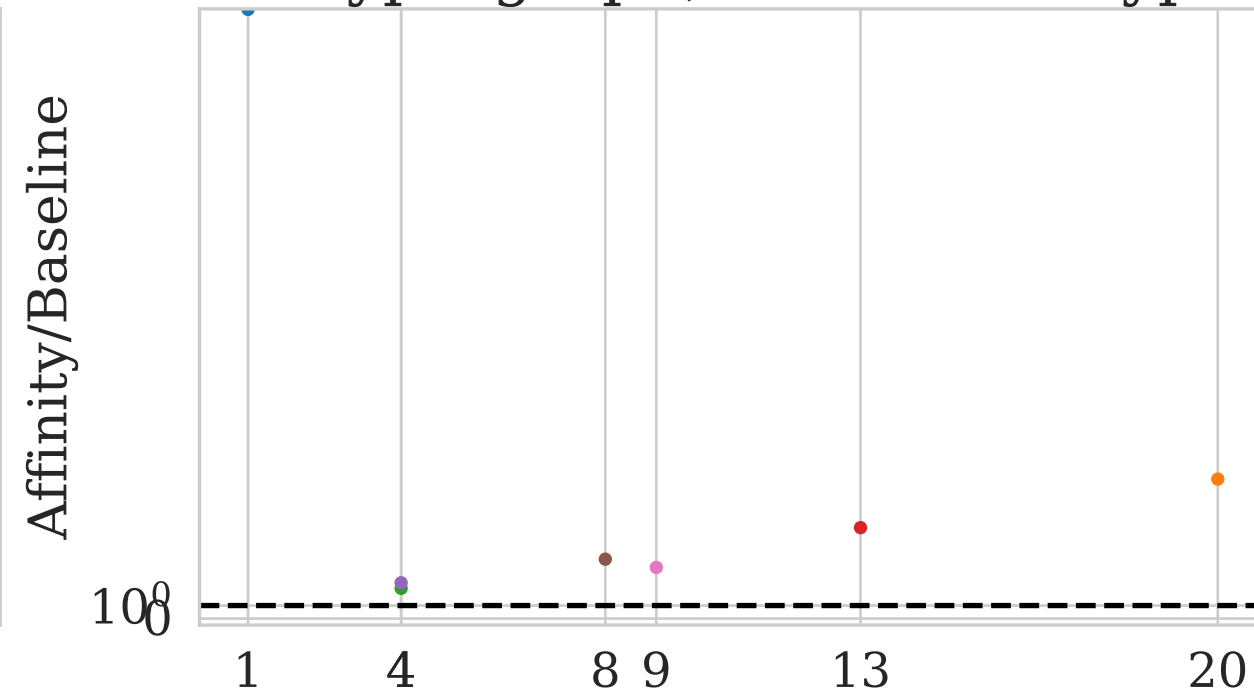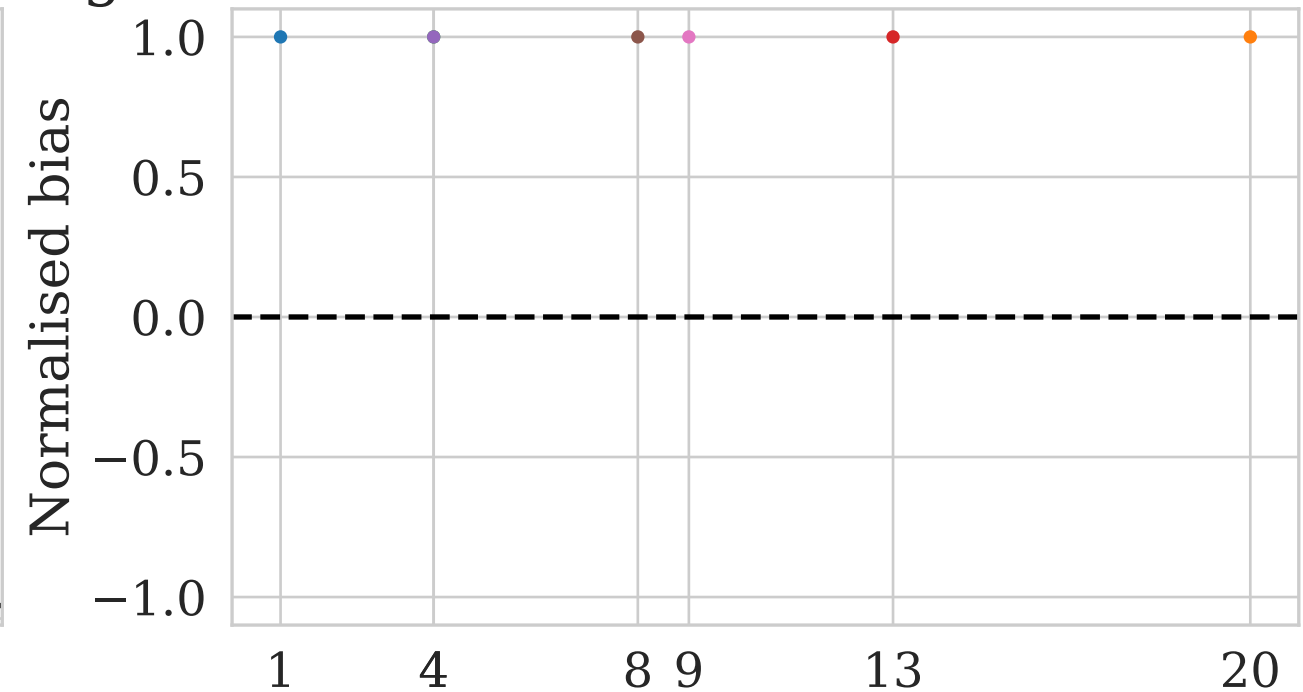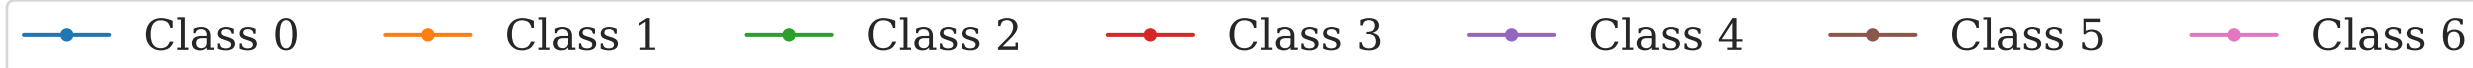



58-uniform hypergraph, number of hyperedges: 1

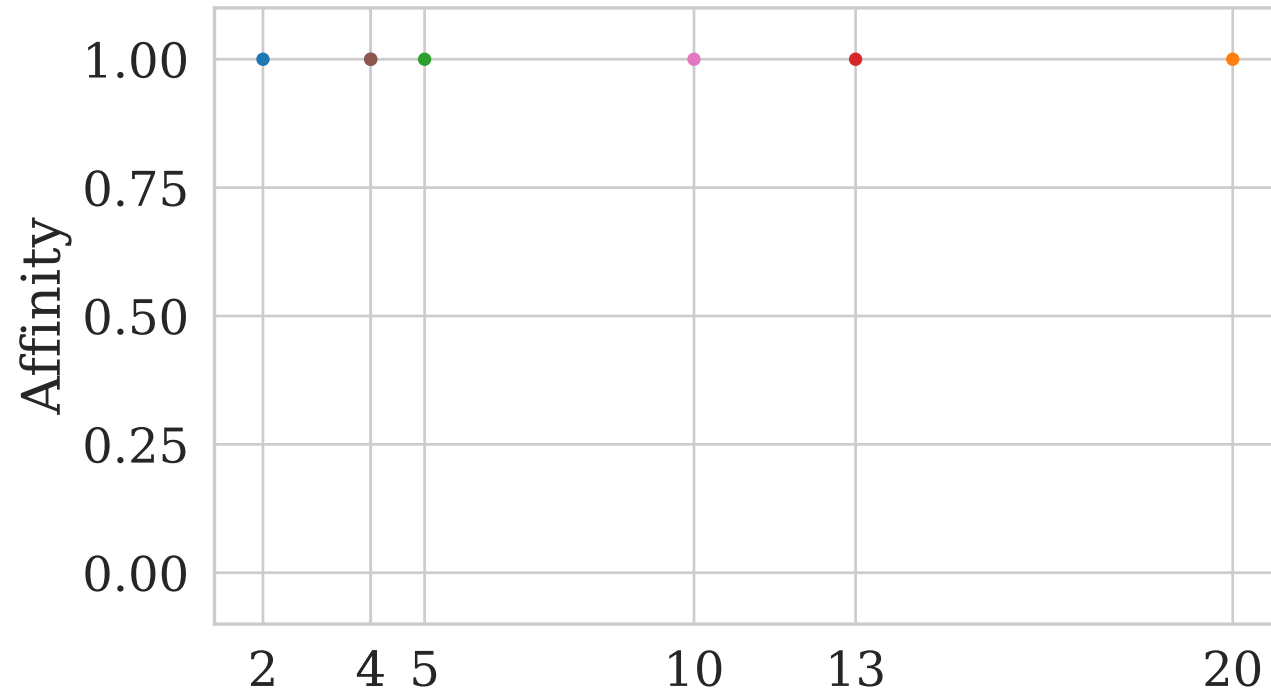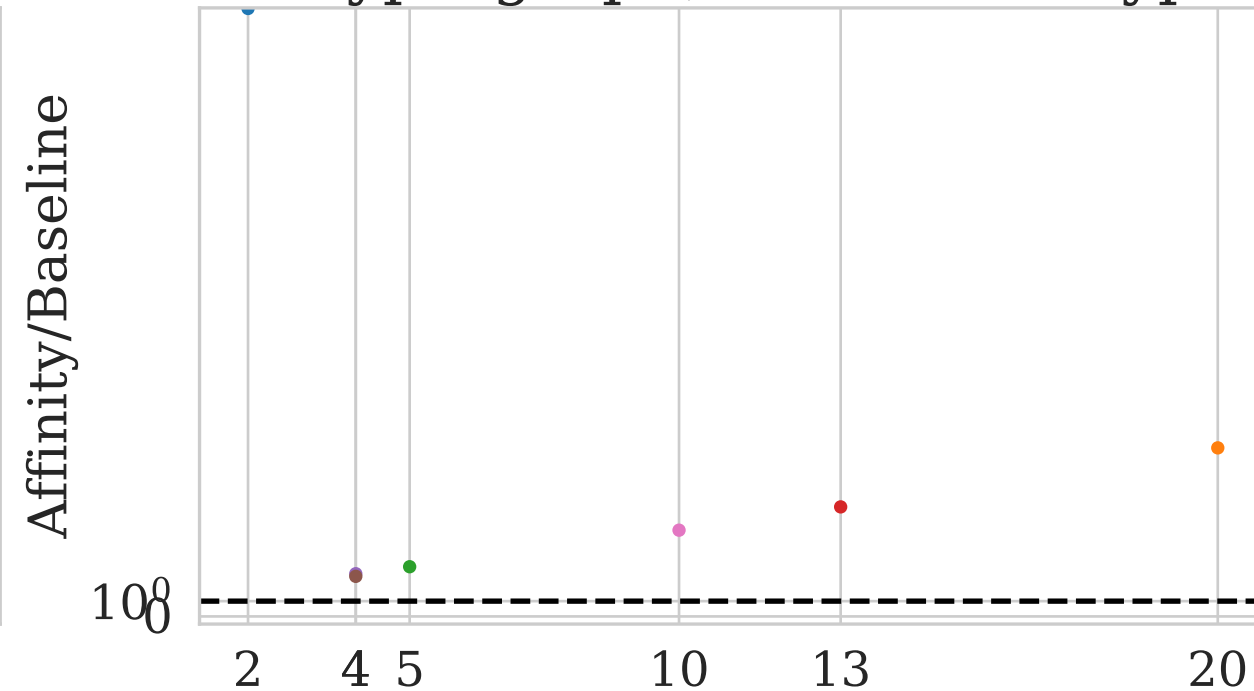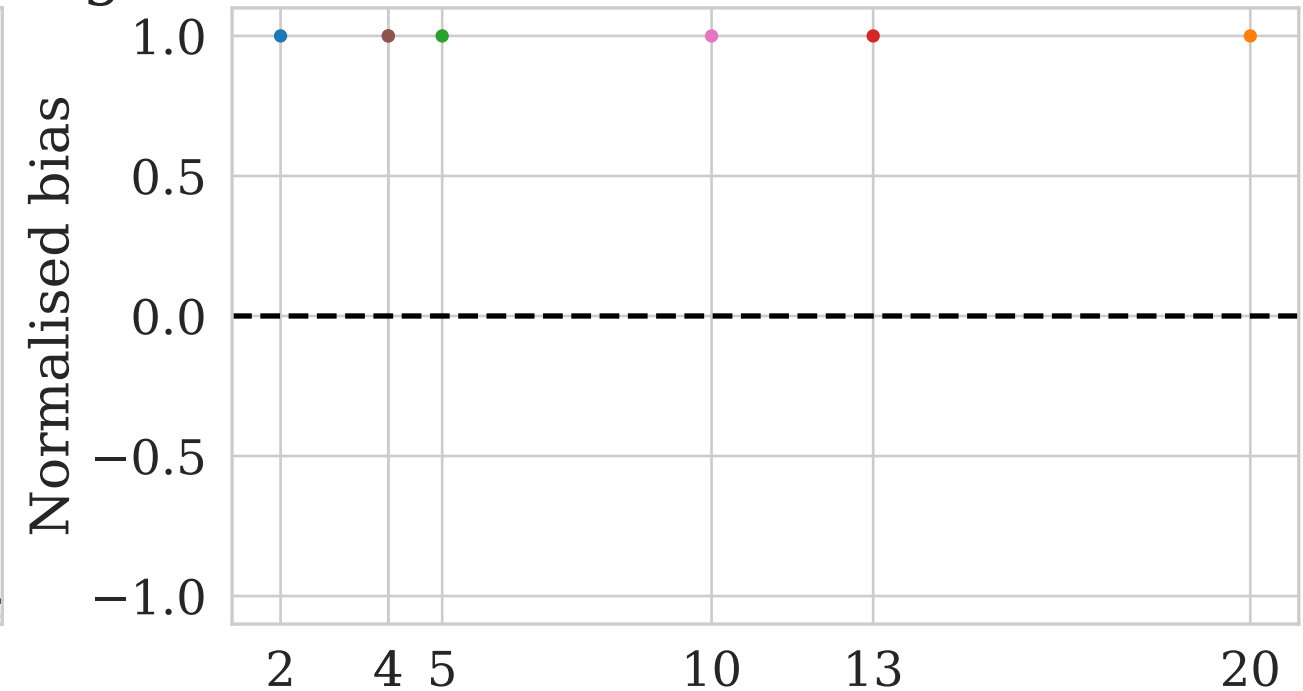

57-uniform hypergraph, number of hyperedges: 1

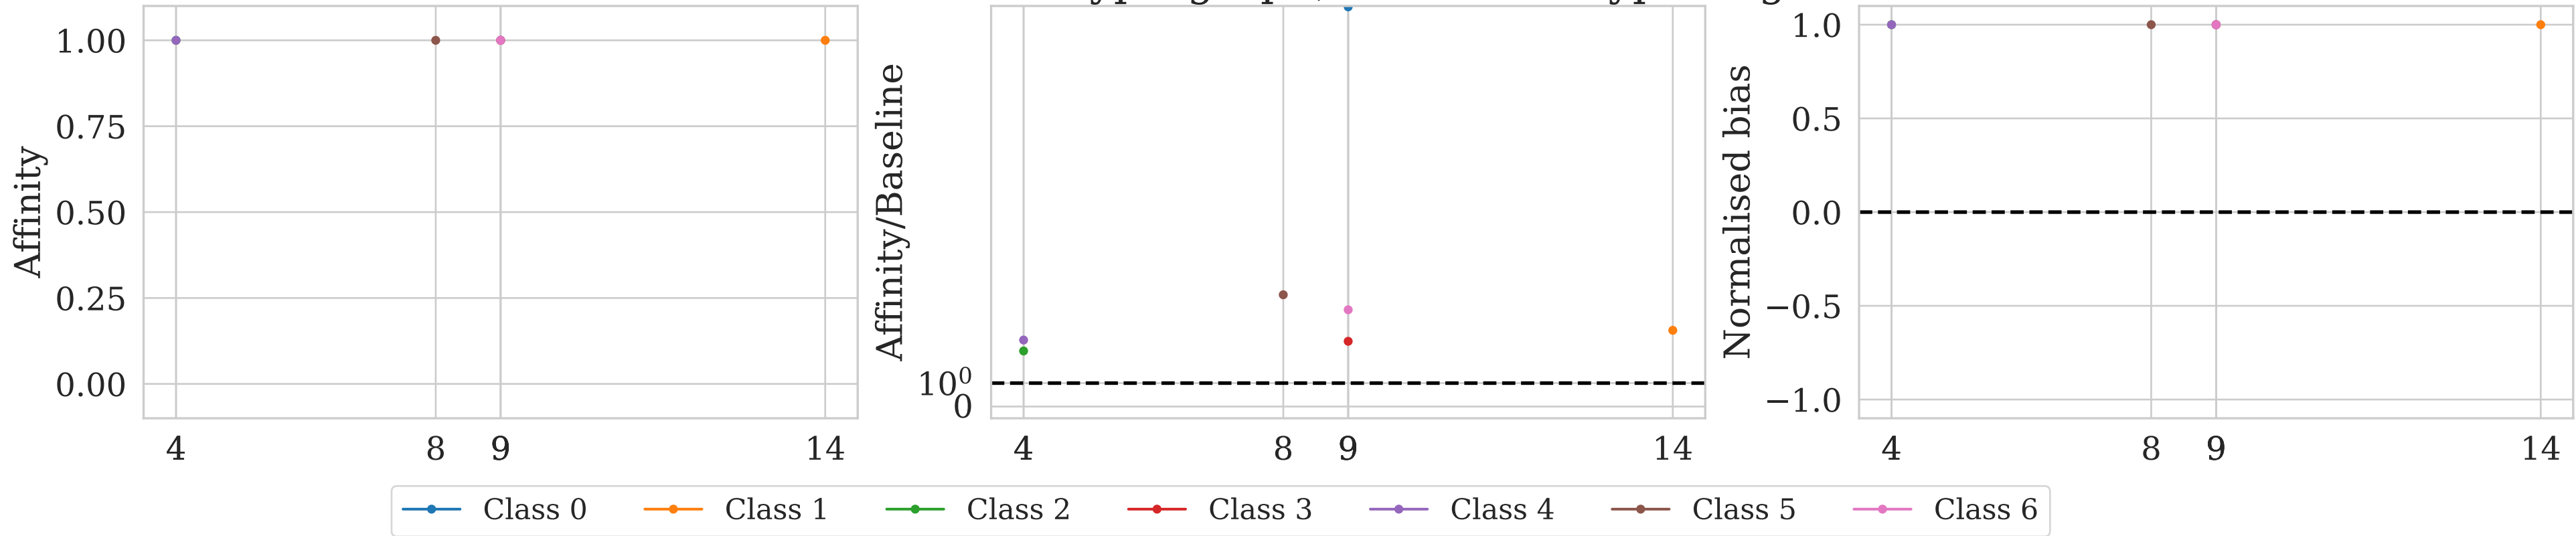

56-uniform hypergraph, number of hyperedges: 1

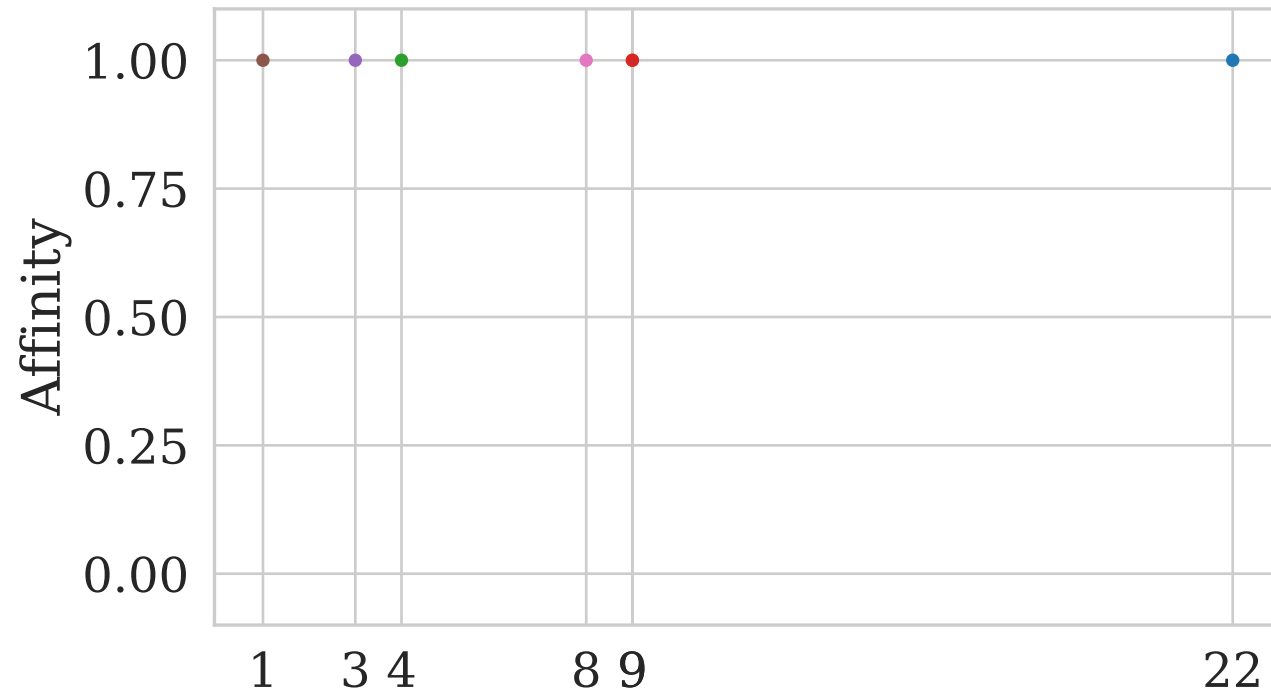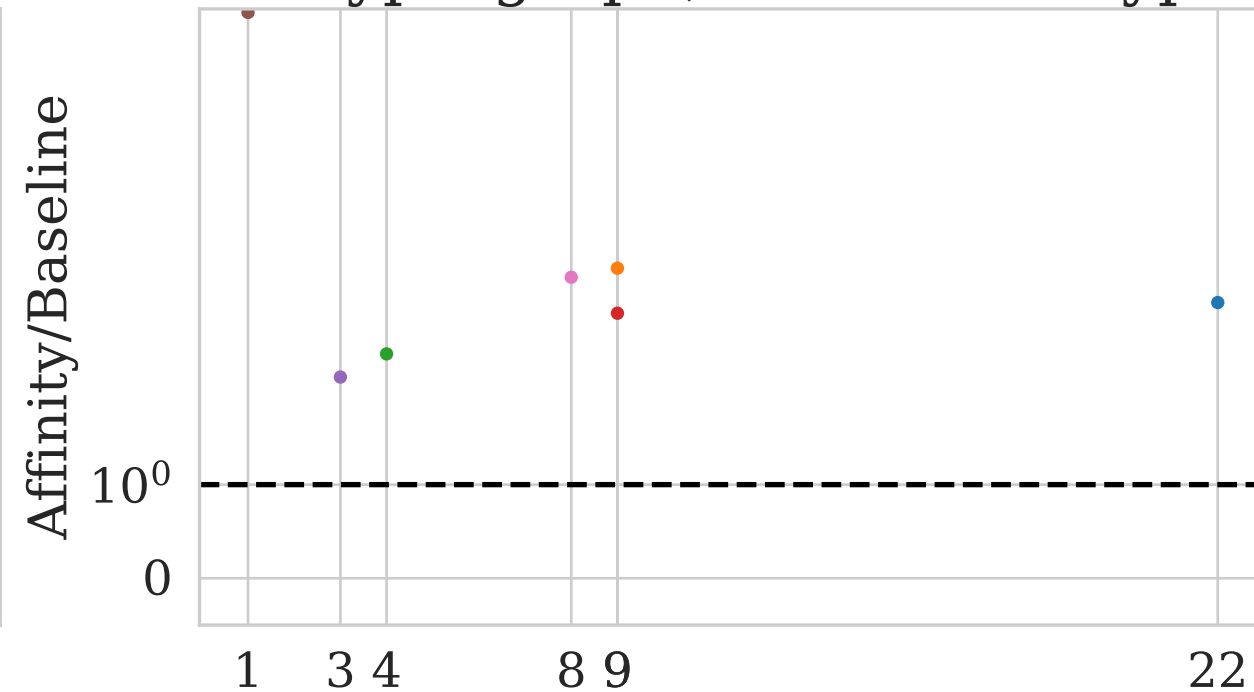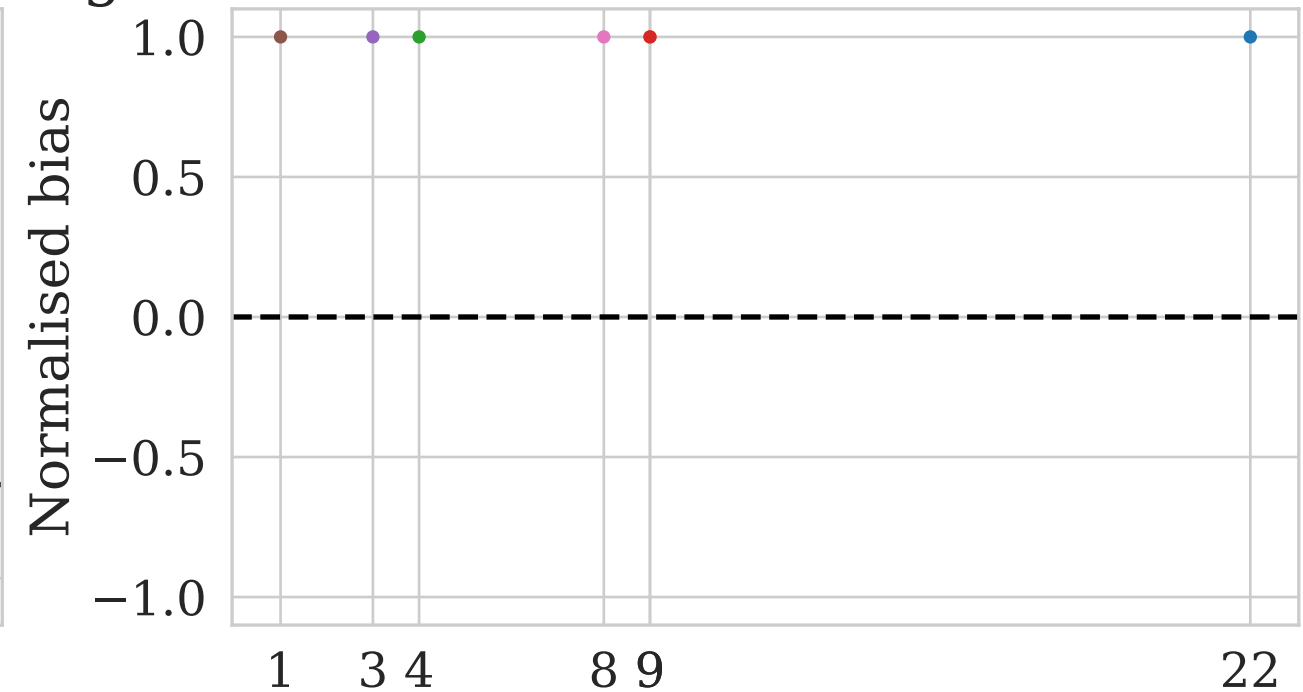

45-uniform hypergraph, number of hyperedges: 1

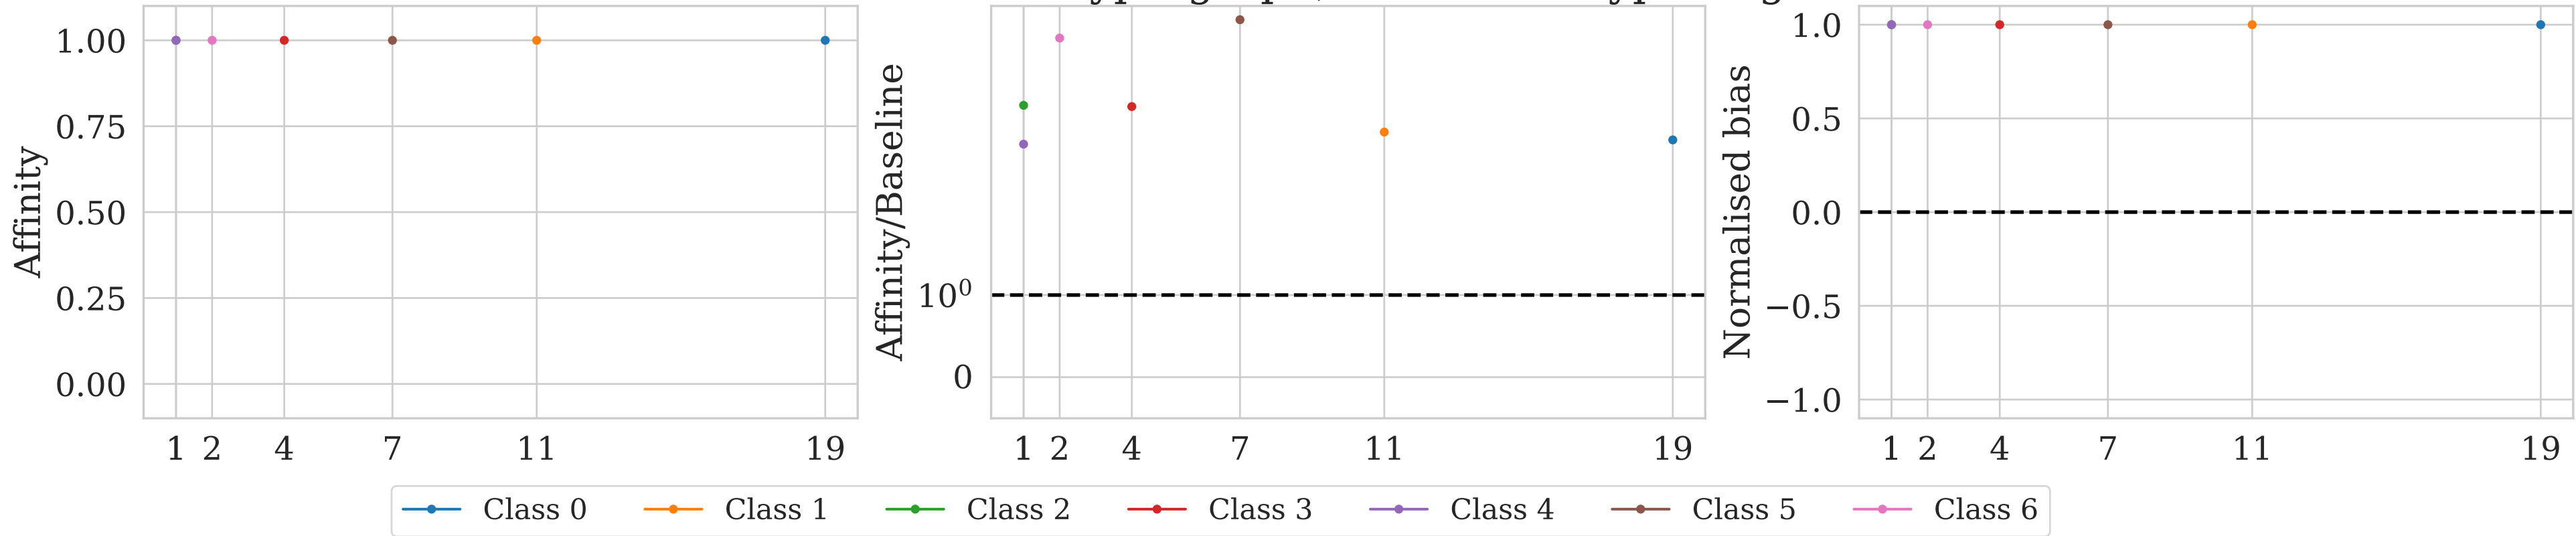

44-uniform hypergraph, number of hyperedges: 1

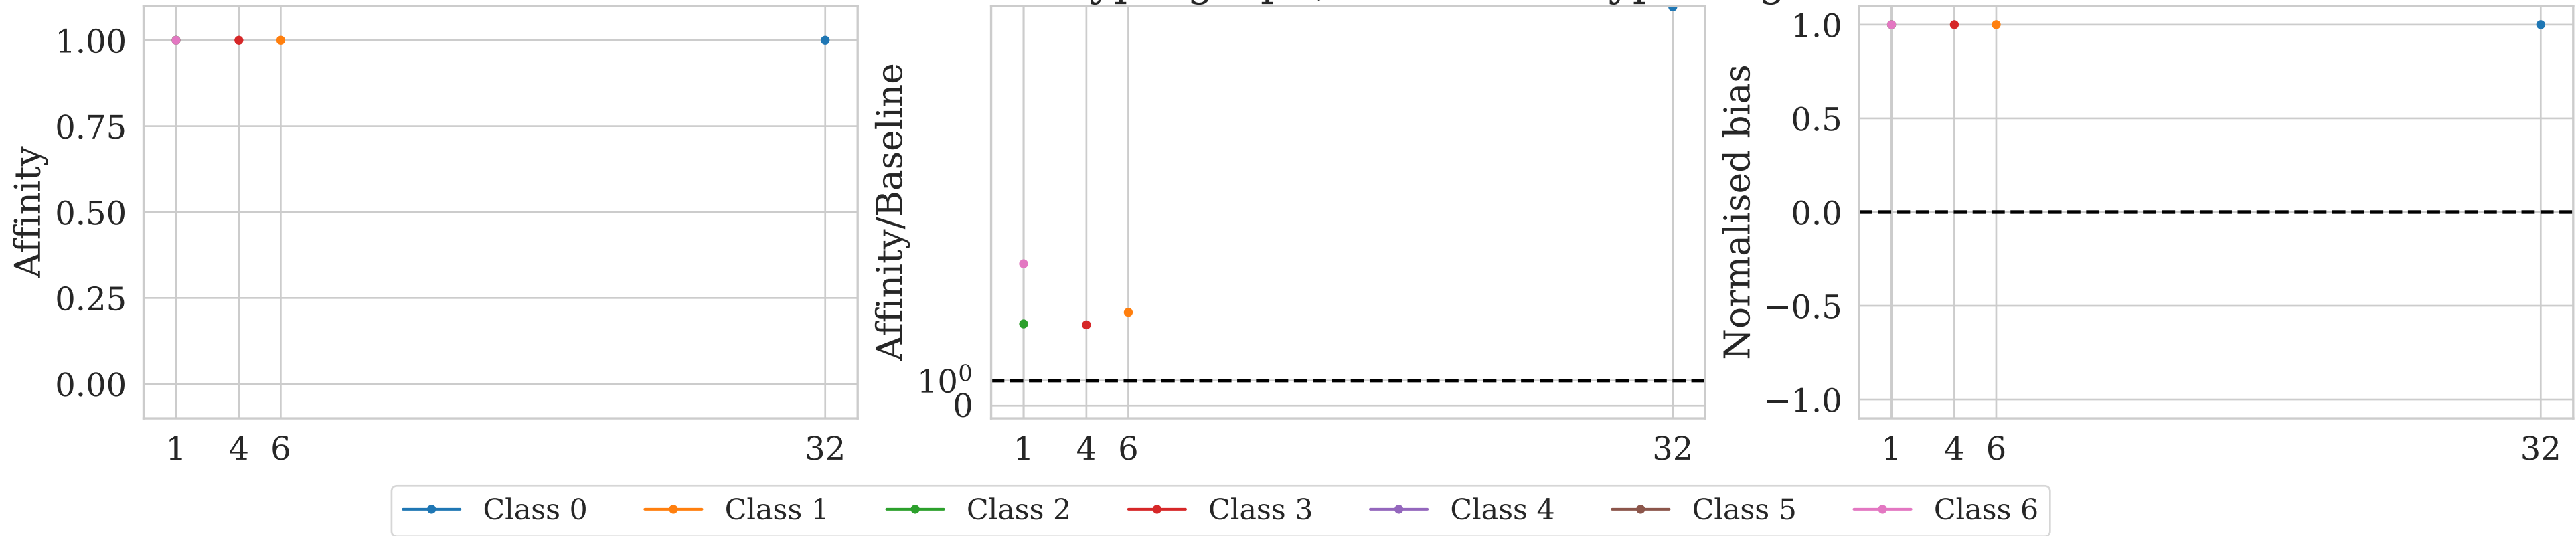

Supplement: supplementary_material [file attachment]
