# Supplementary material
Source: ML conference proceedings conference paper supplement (https://openreview.net/forum?id=YPpkFqMX6V)

2-uniform hypergraph, number of hyperedges: 9976

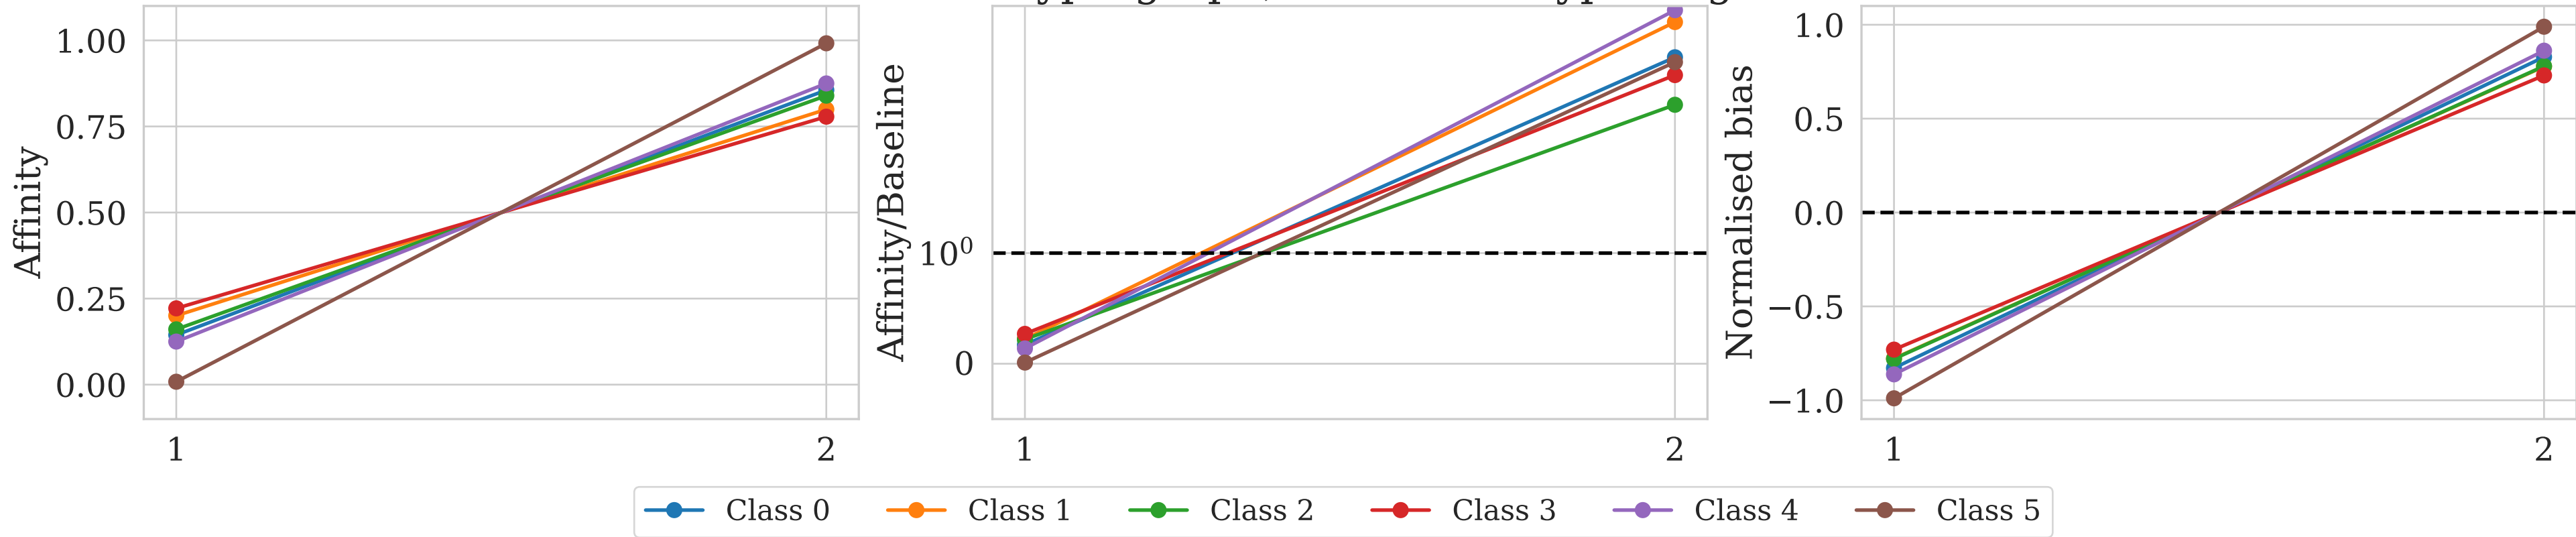

3-uniform hypergraph, number of hyperedges: 4339

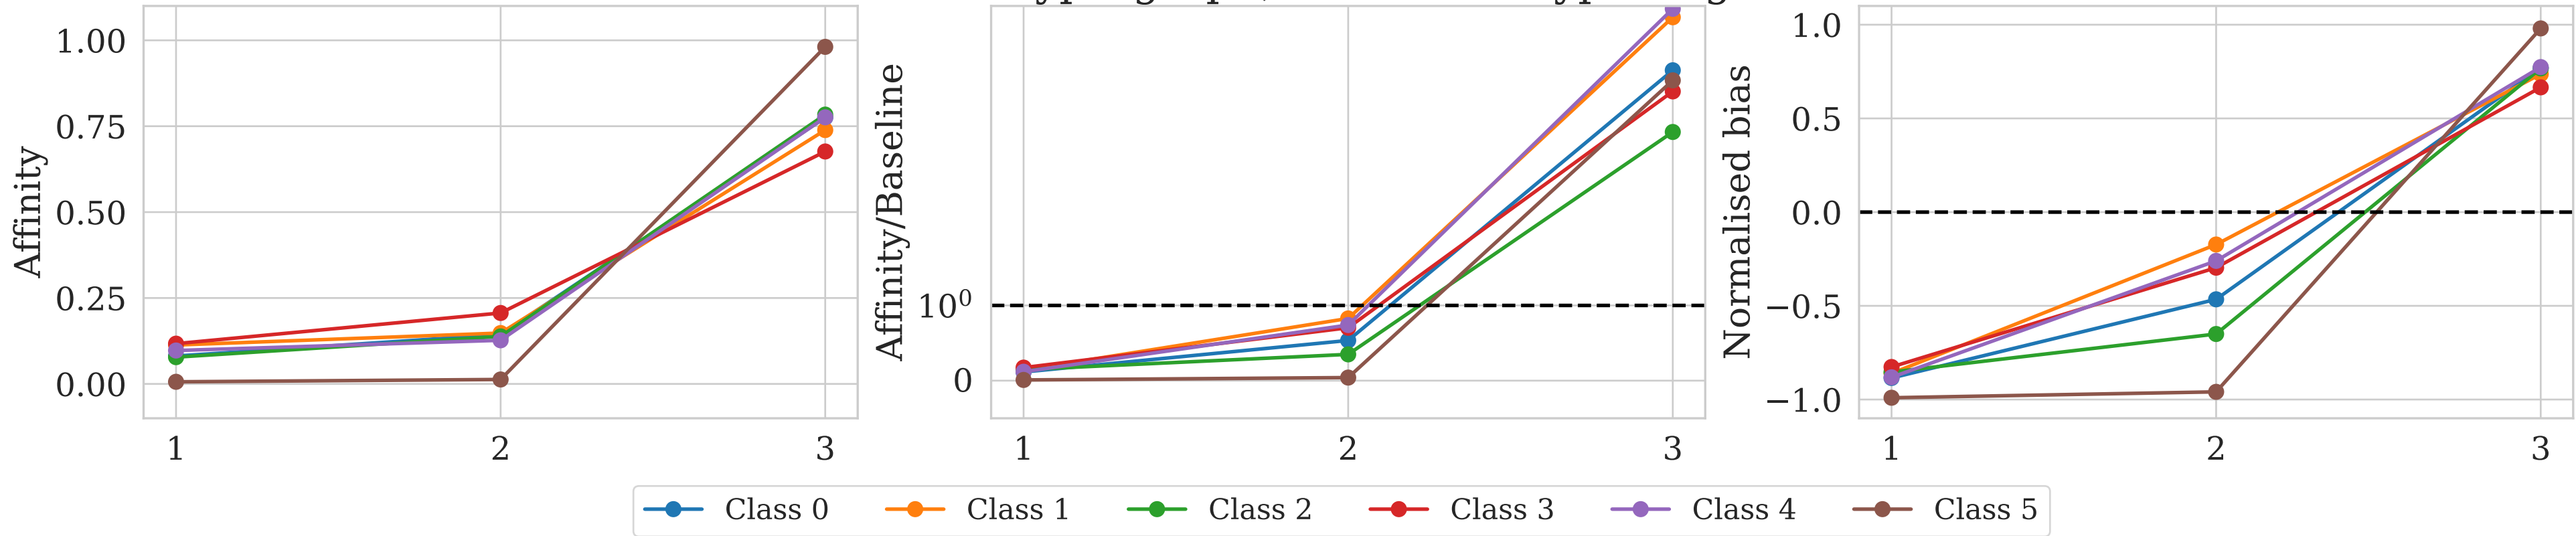

4-uniform hypergraph, number of hyperedges: 2312

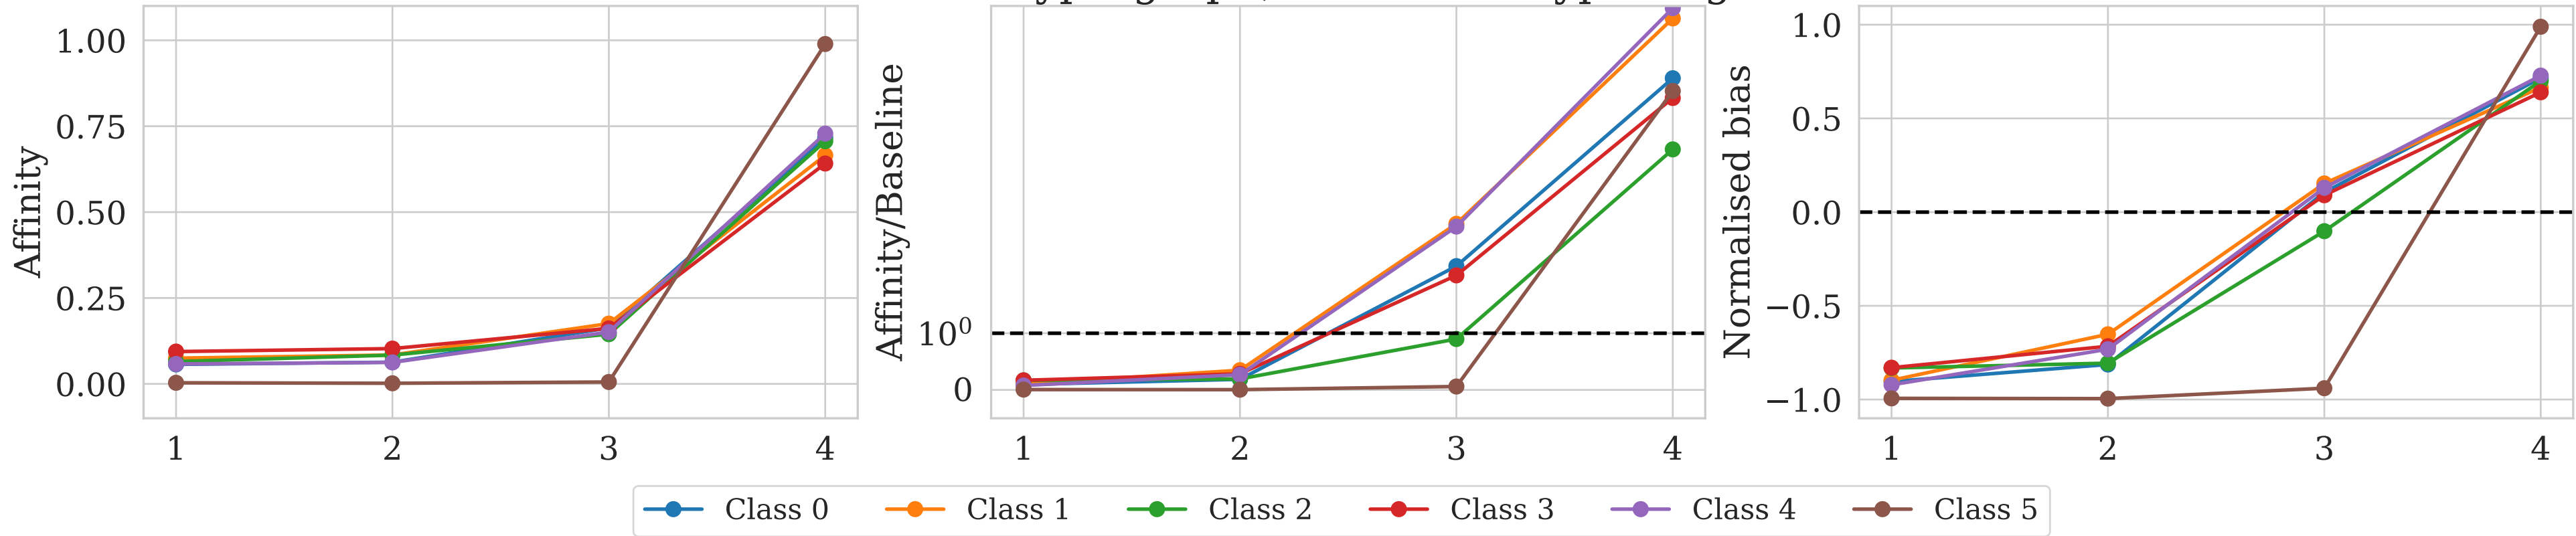

5-uniform hypergraph, number of hyperedges: 1419

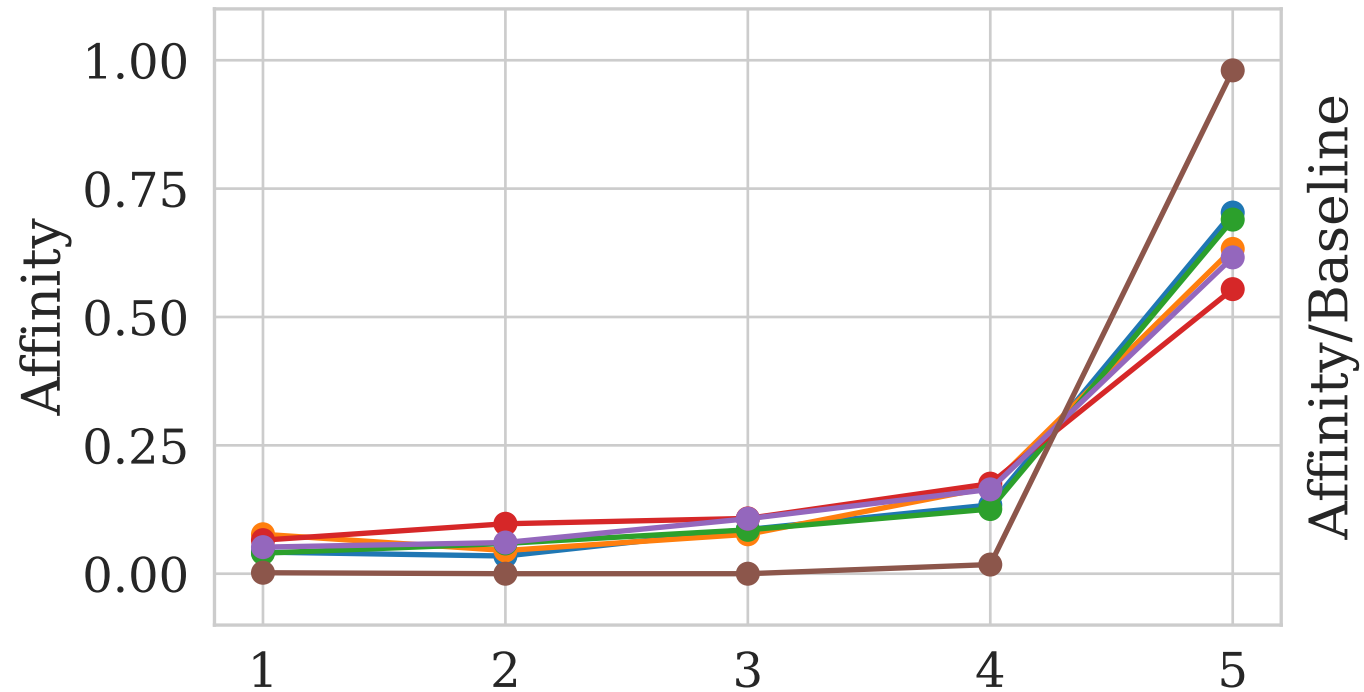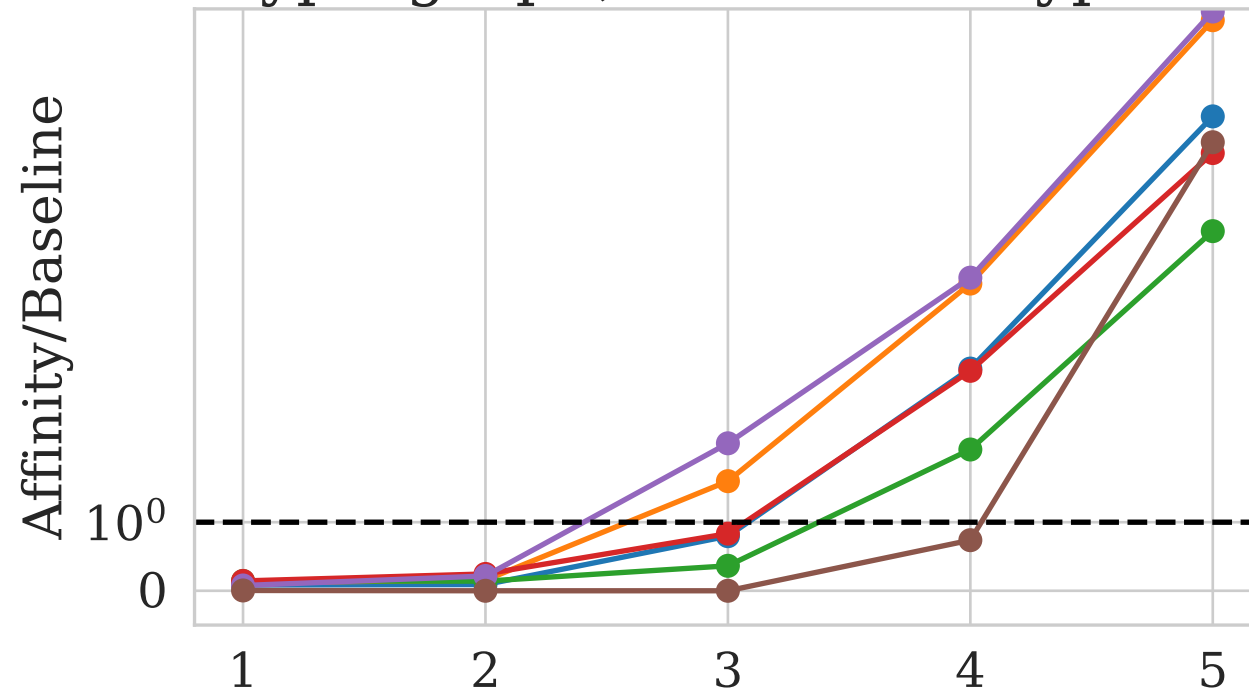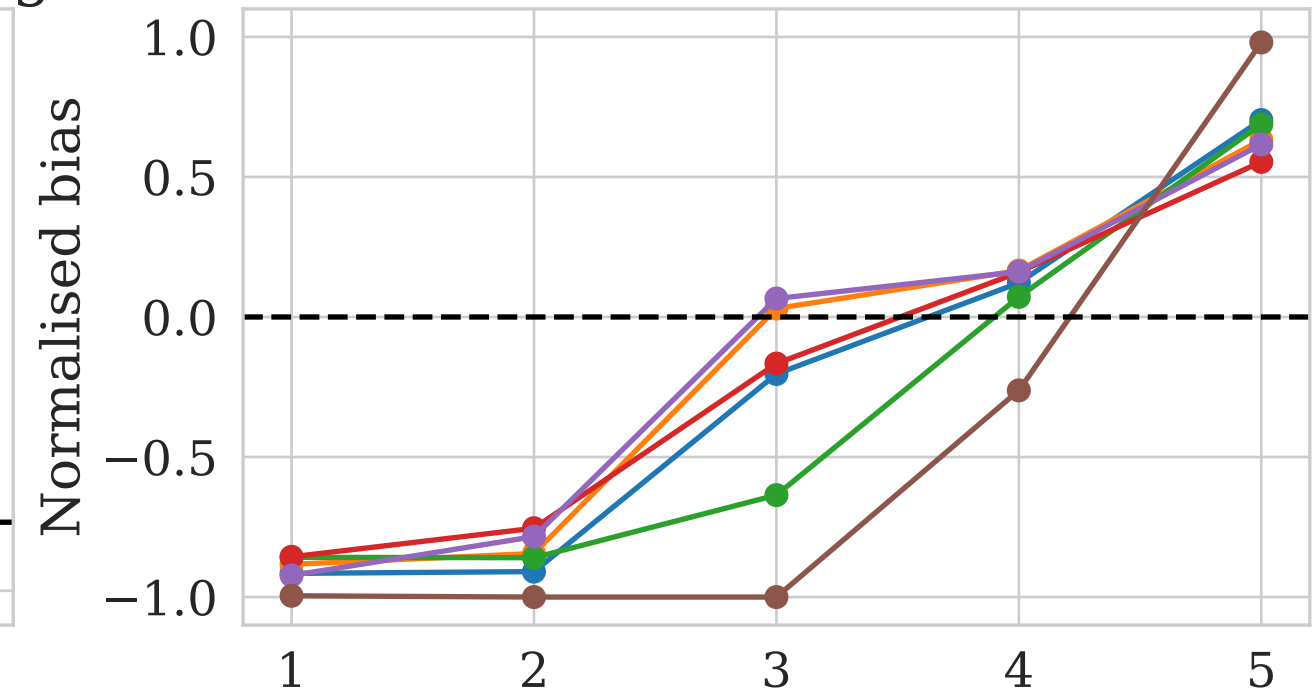

Class 0 Class 1 Class 2 Class 3 Class 4 Class 5

6-uniform hypergraph, number of hyperedges: 906

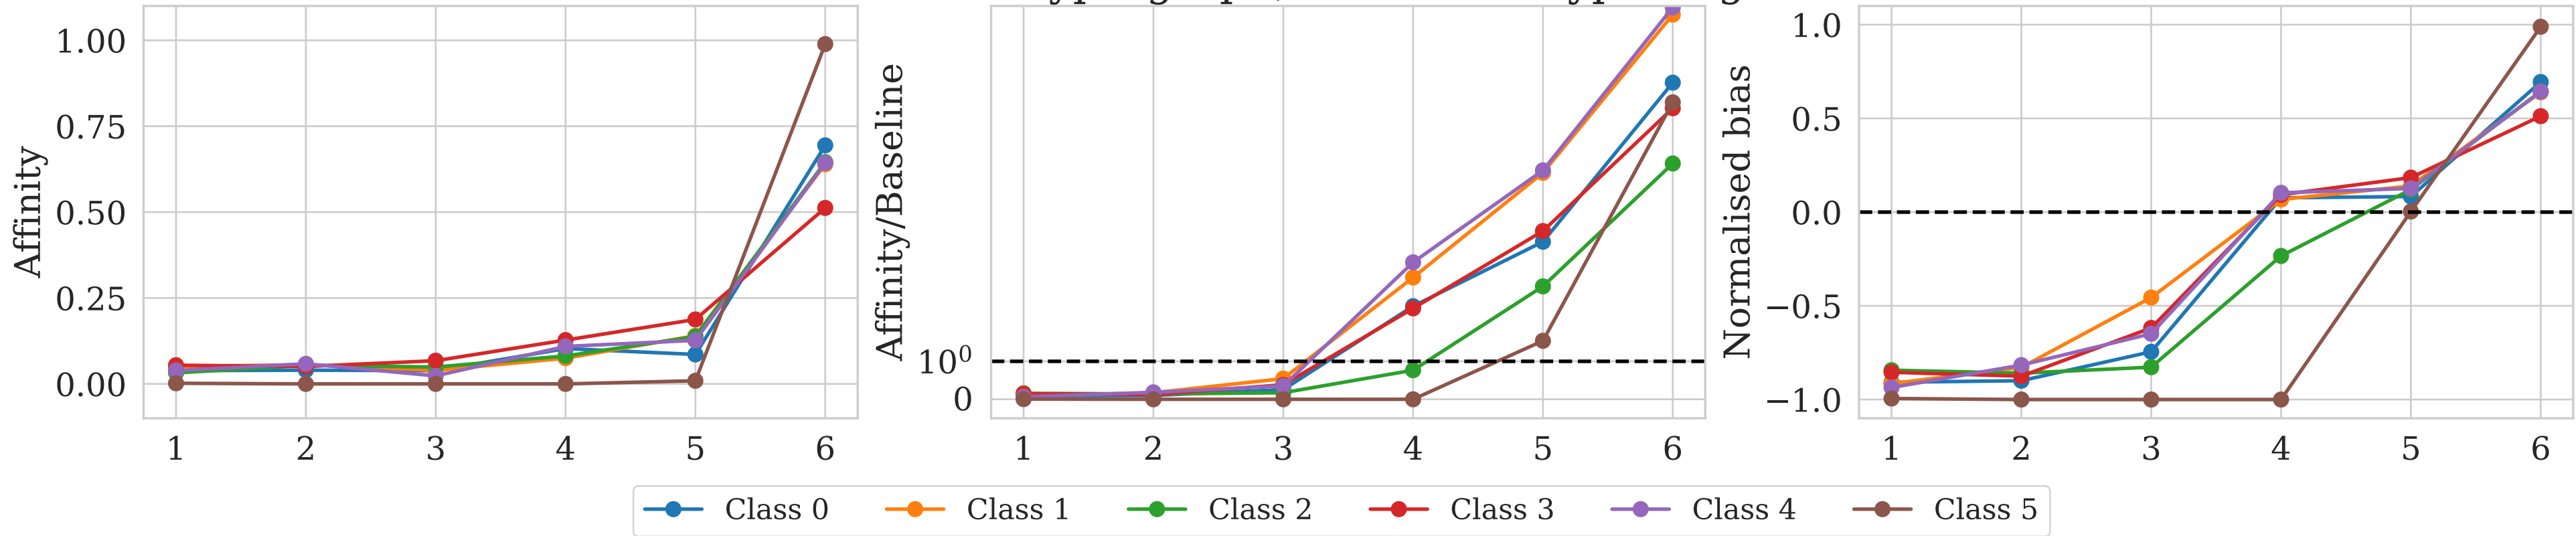

7-uniform hypergraph, number of hyperedges: 659

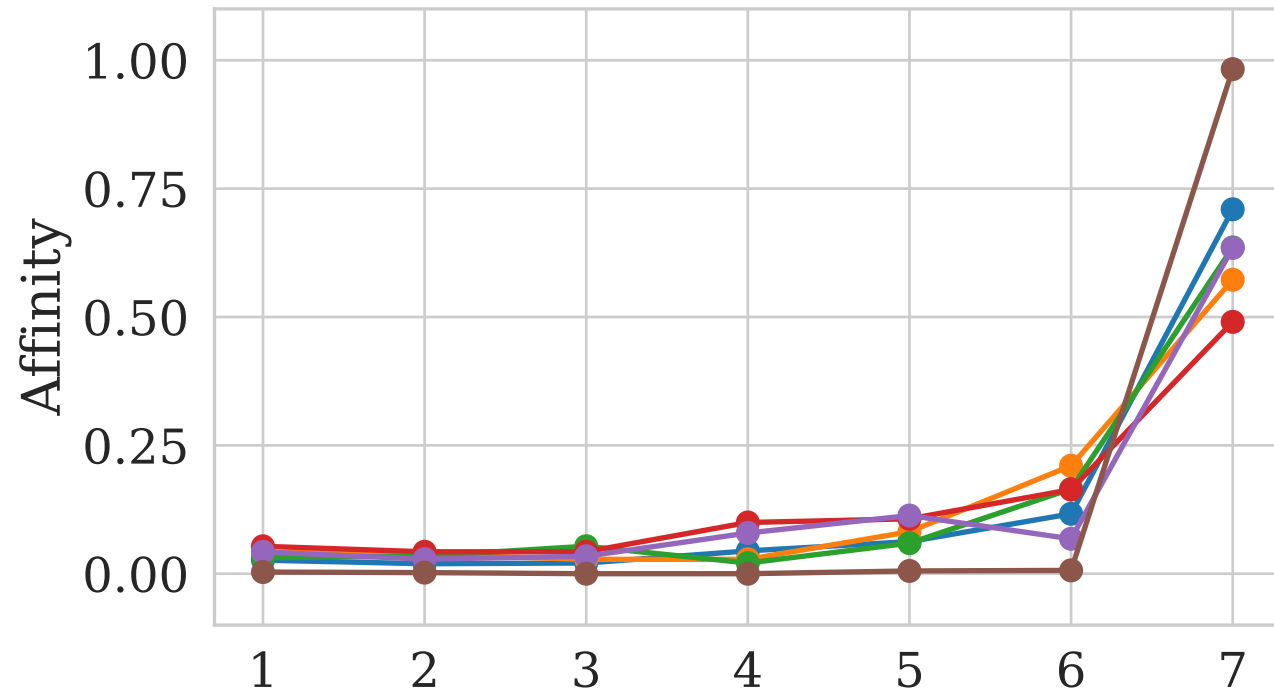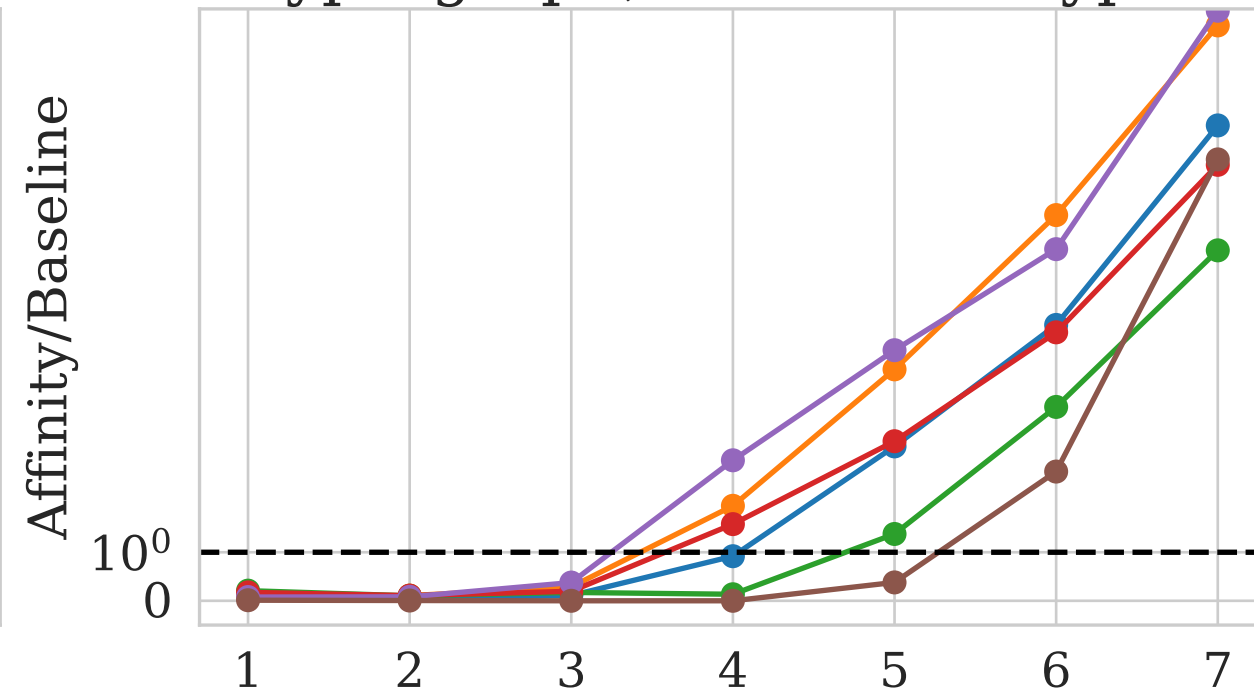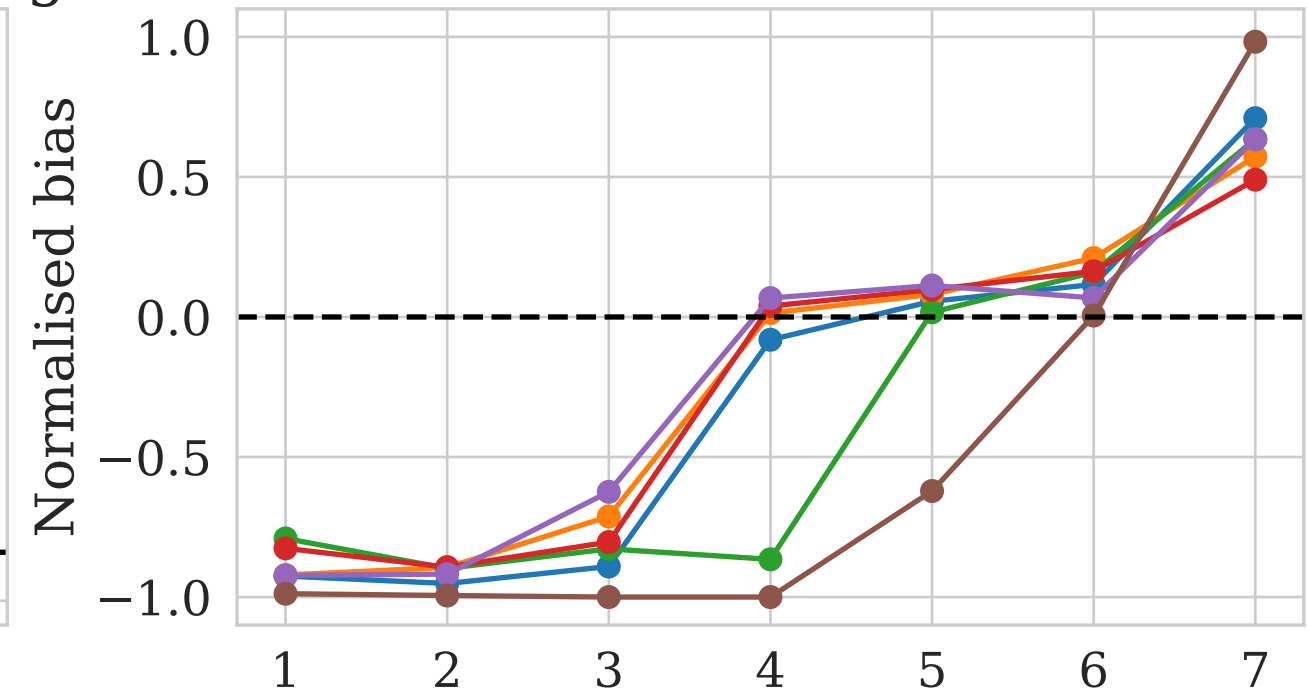

Class 0 Class 1 Class 2 Class 3 Class 4 Class 5

8-uniform hypergraph, number of hyperedges: 504

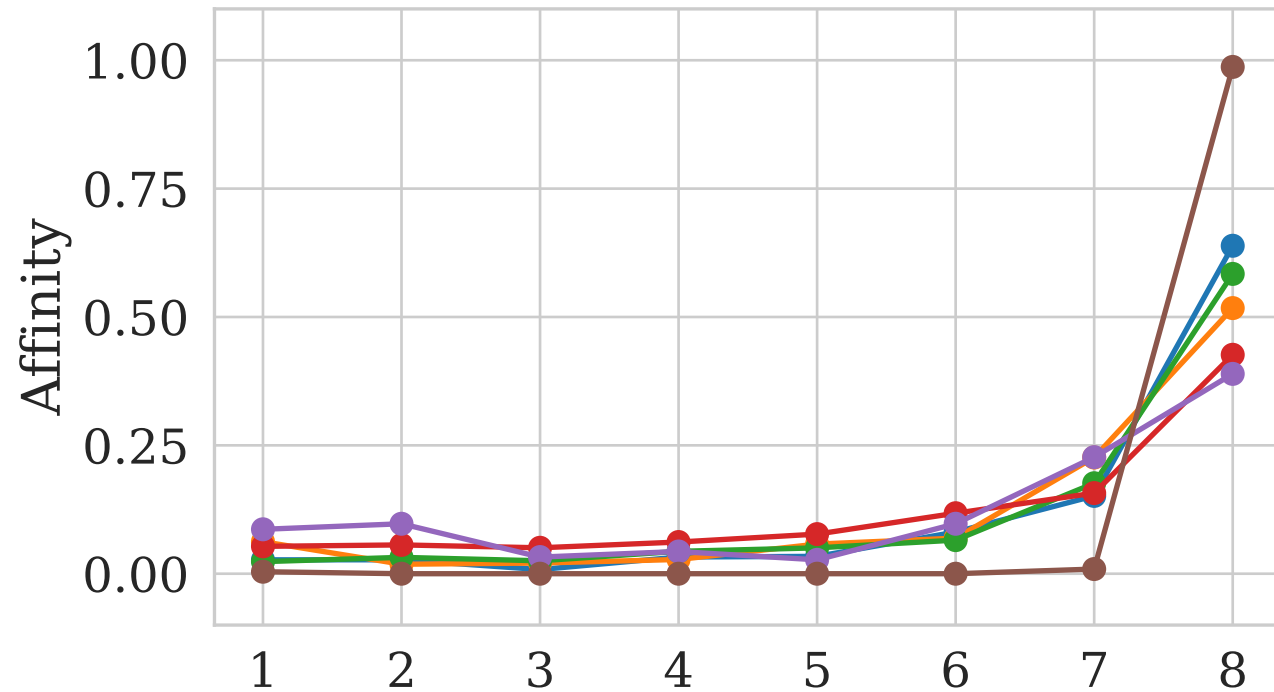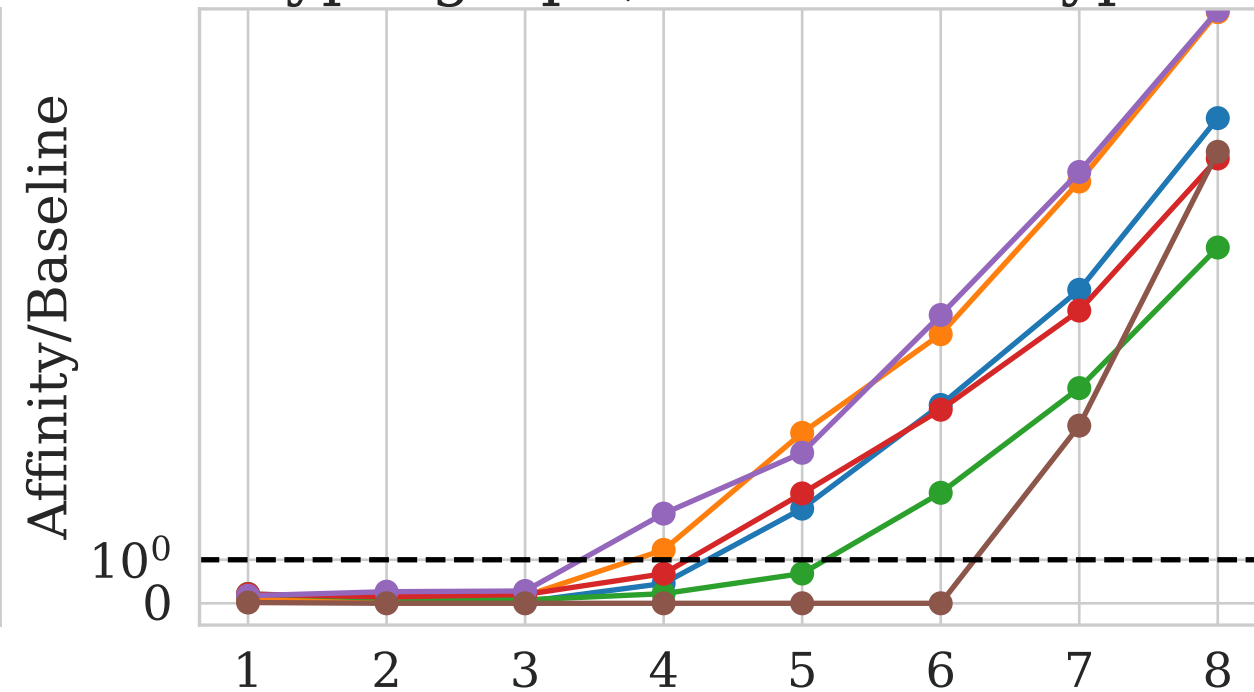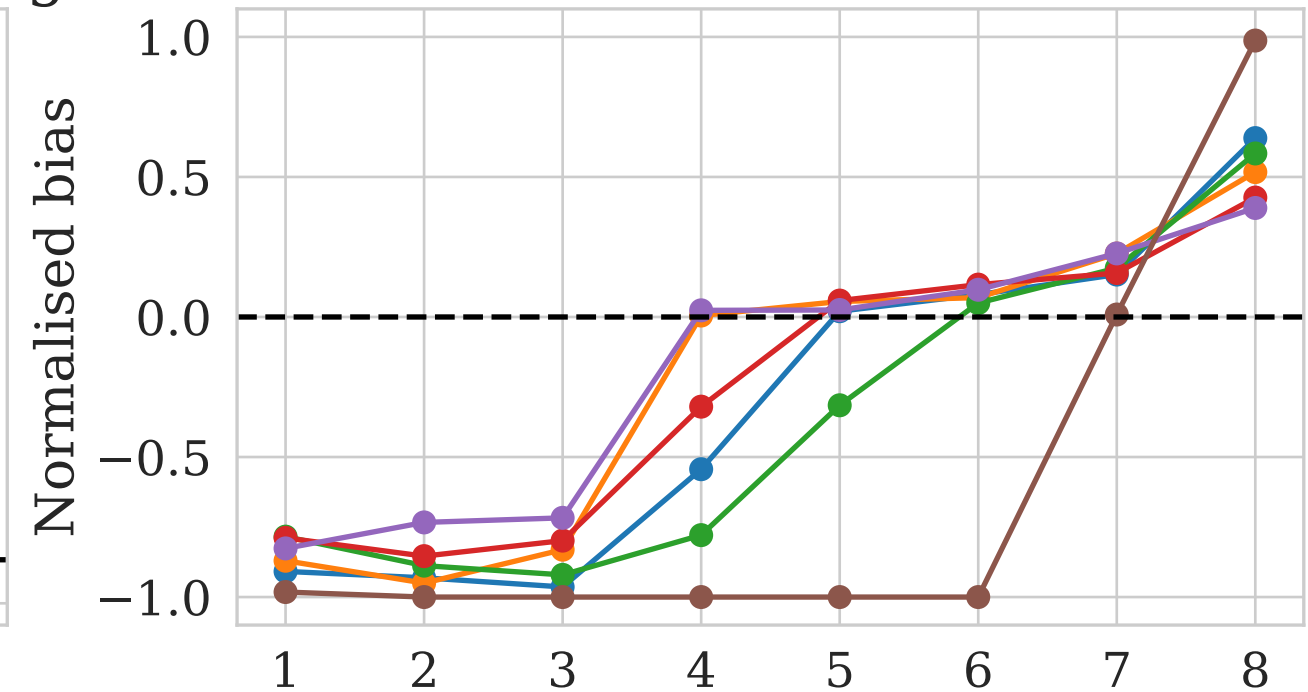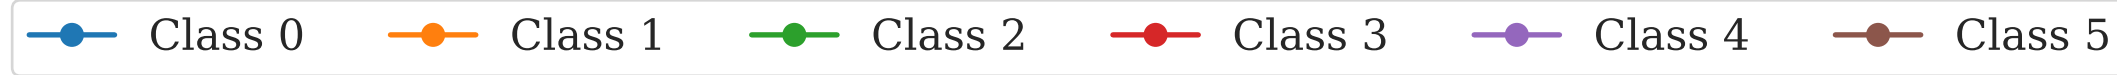

9-uniform hypergraph, number of hyperedges: 360

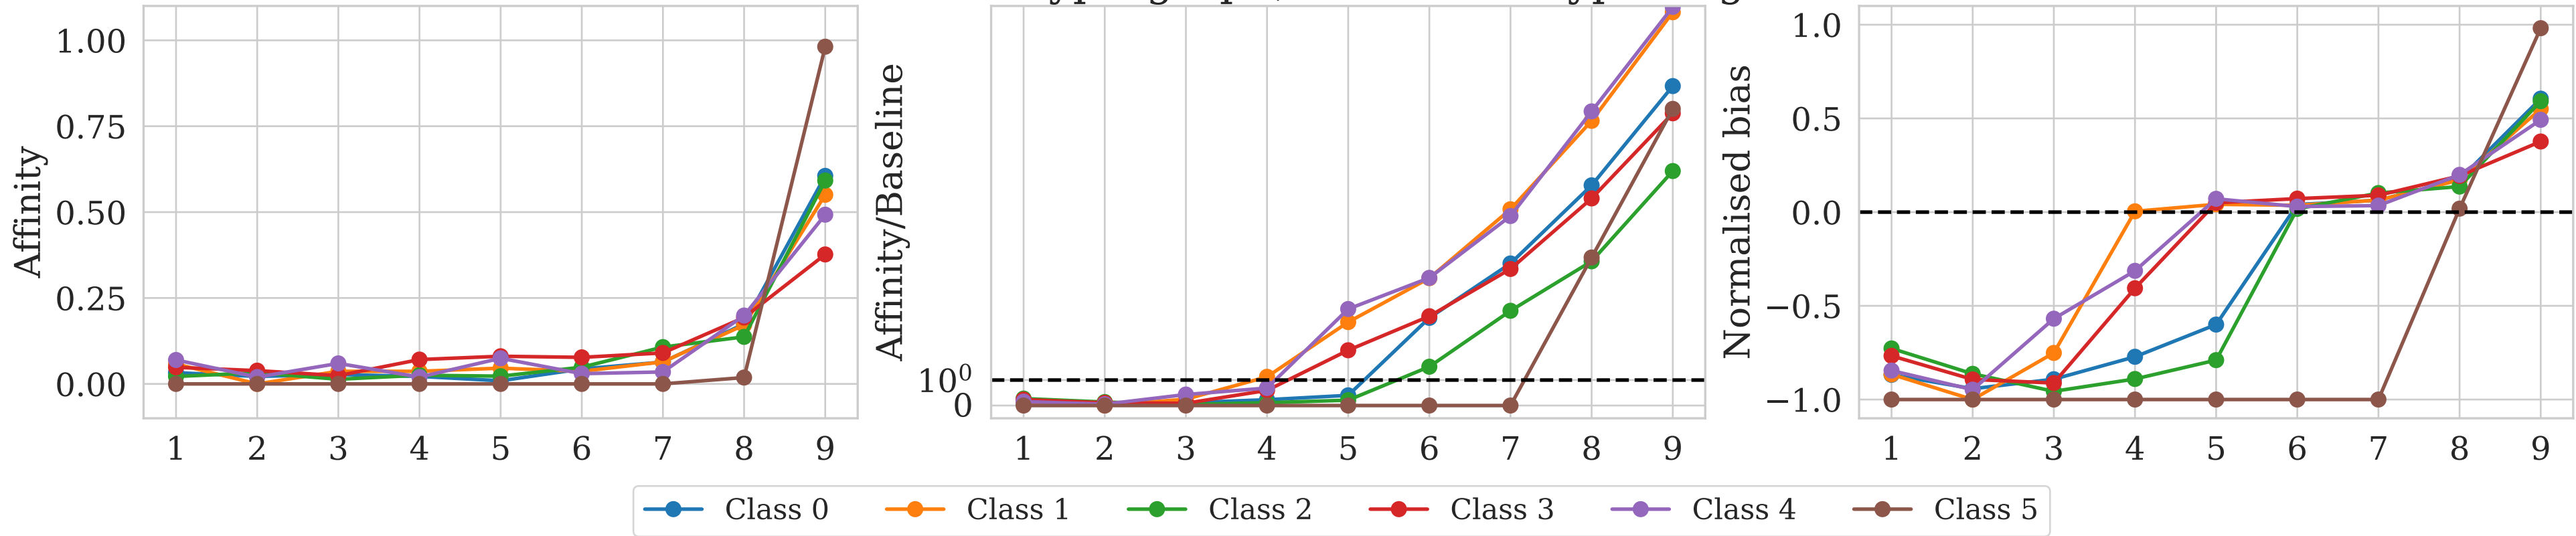



10-uniform hypergraph, number of hyperedges: 325

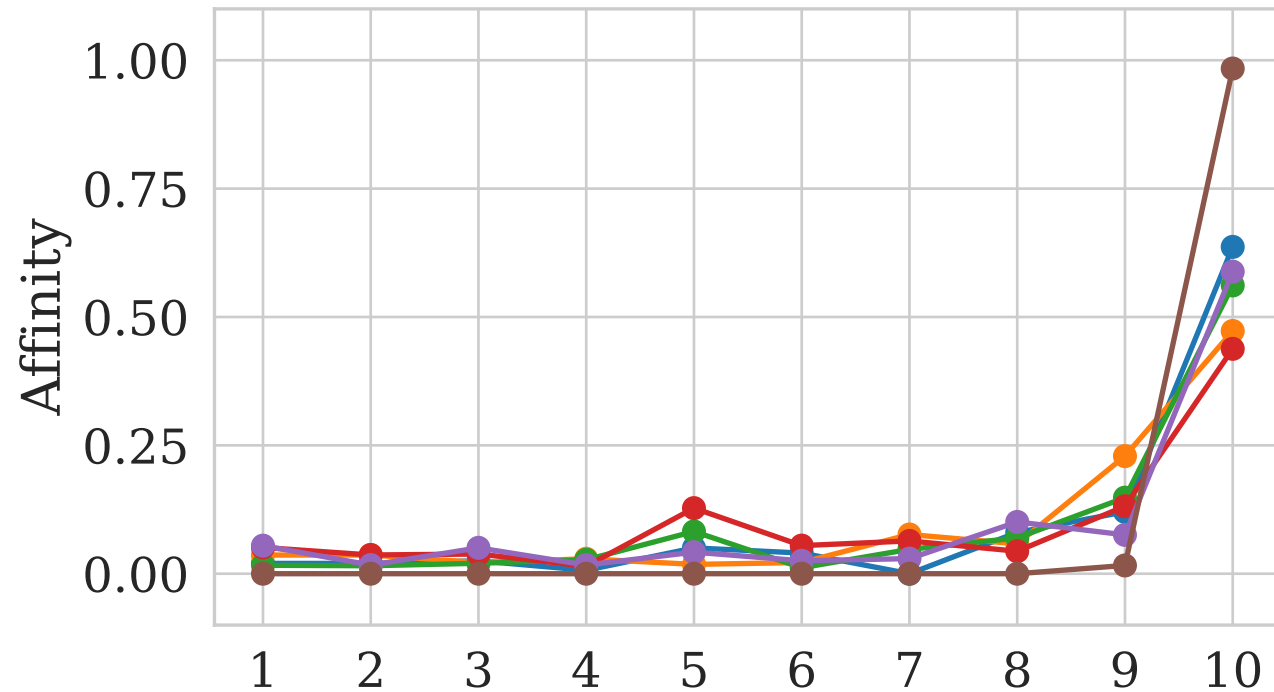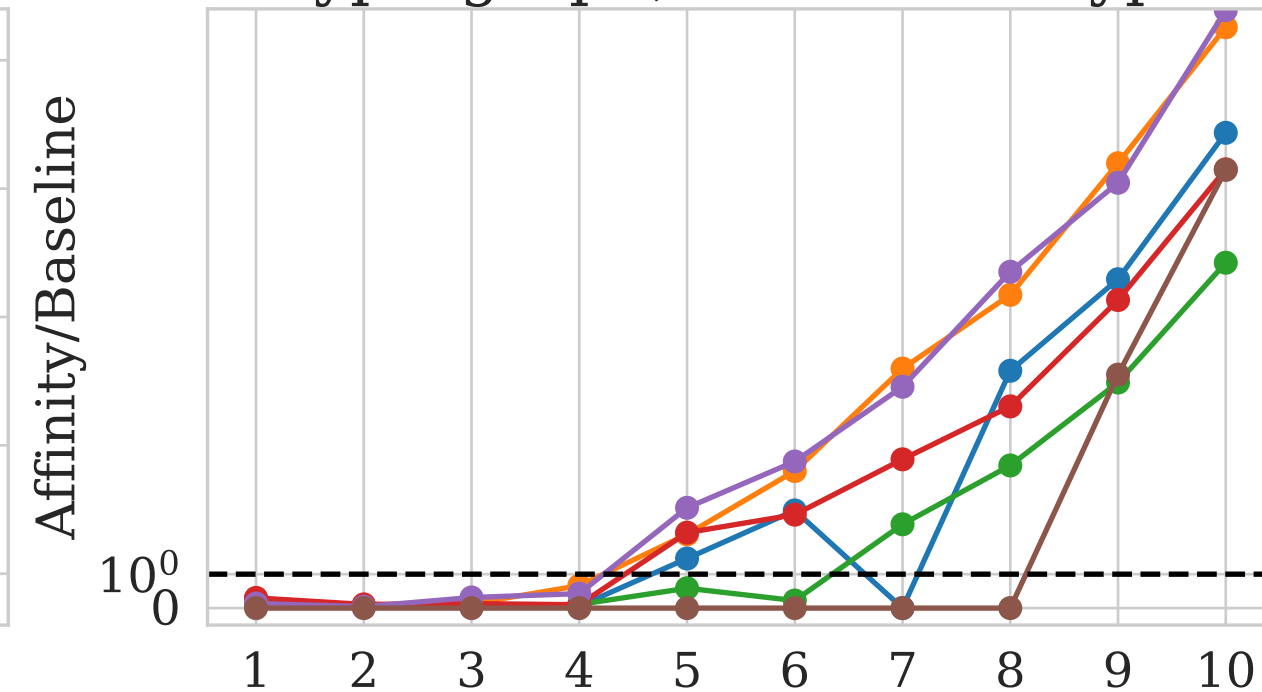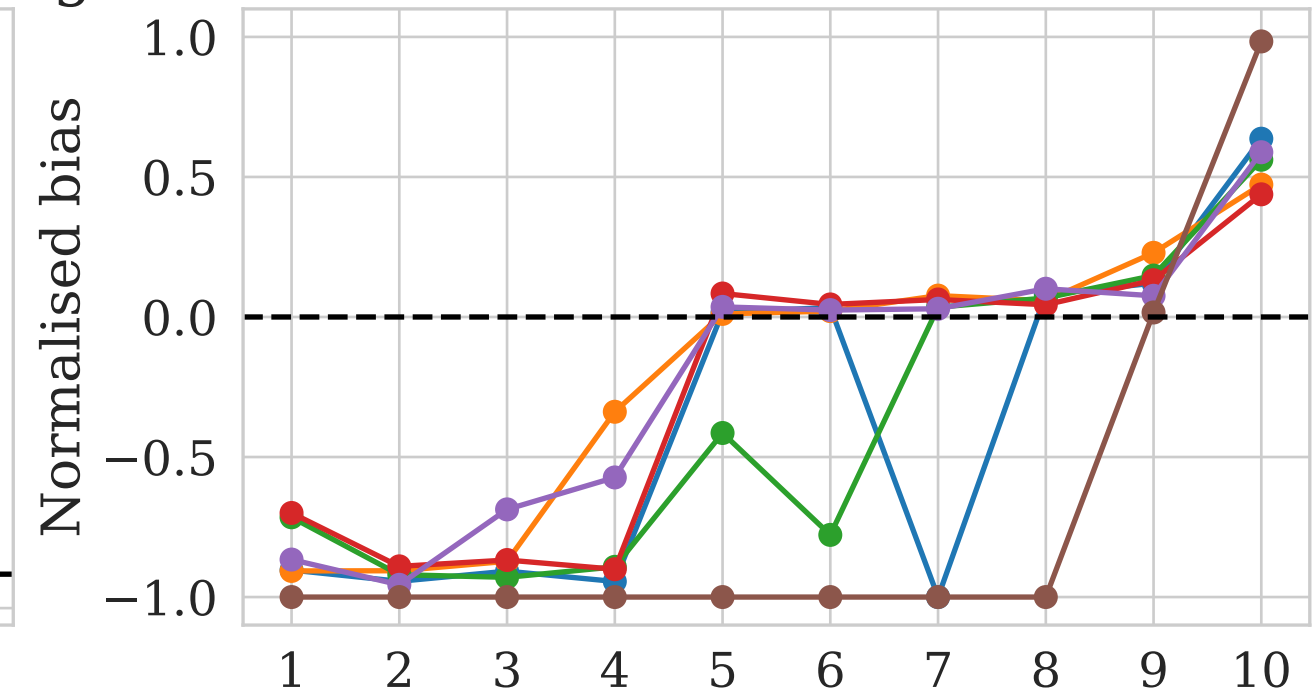

● Class 0
 ● Class 1
 ● Class 2
 ● Class 3
 ● Class 4
 ● Class 5

11-uniform hypergraph, number of hyperedges: 223

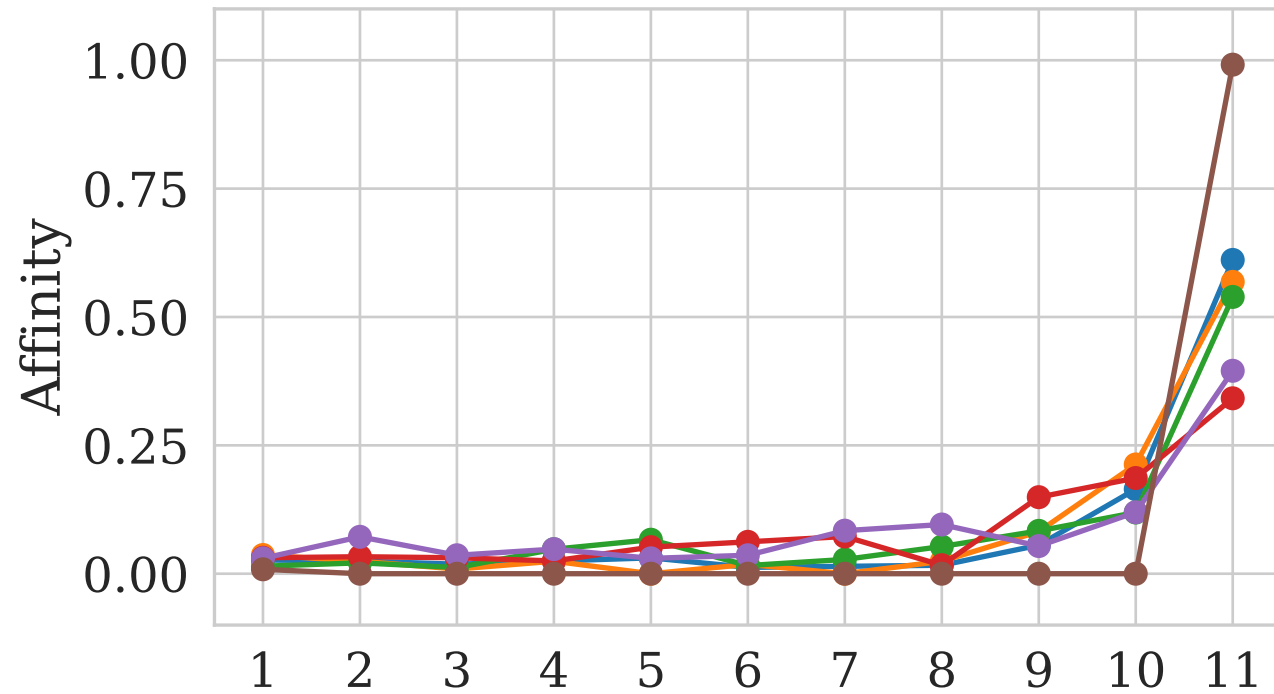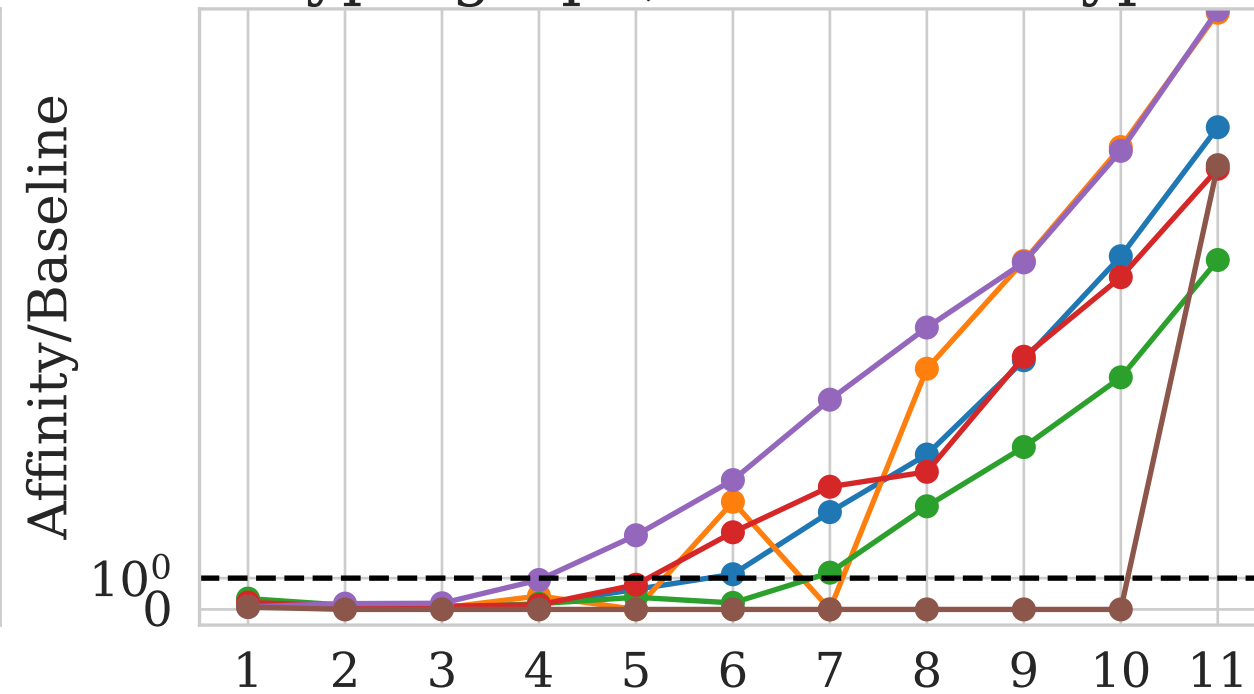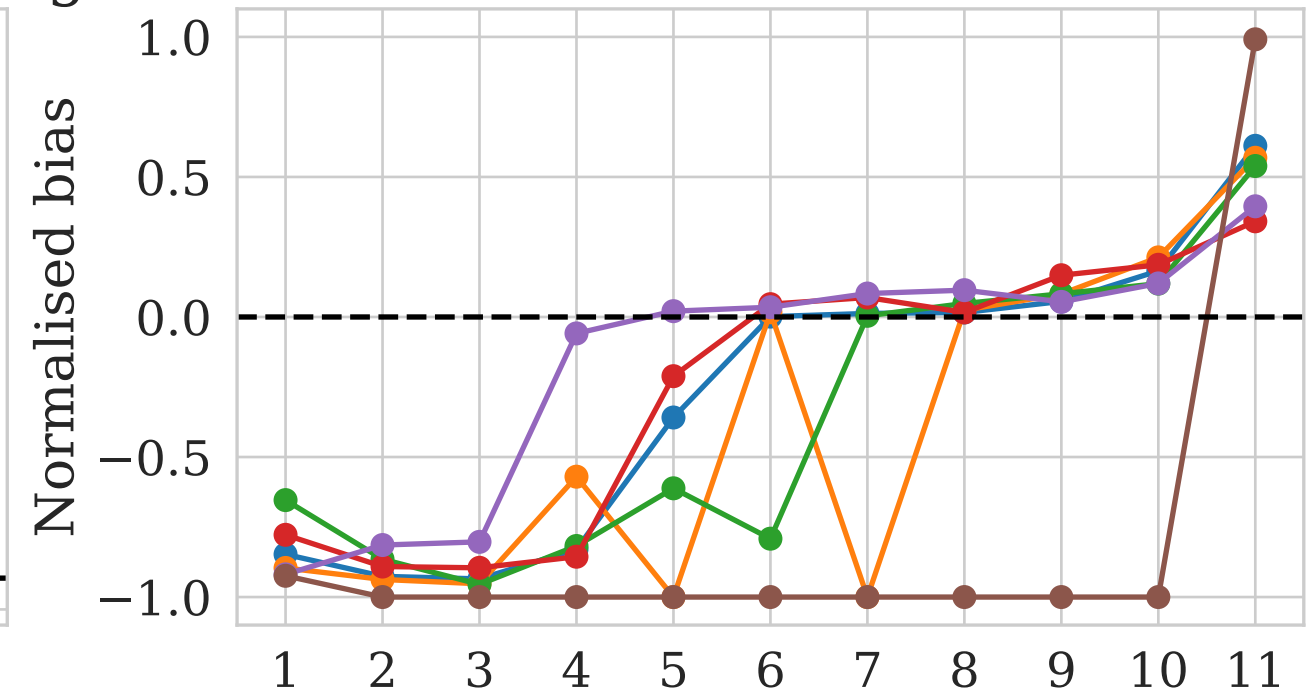

Class 0 Class 1 Class 2 Class 3 Class 4 Class 5

12-uniform hypergraph, number of hyperedges: 197

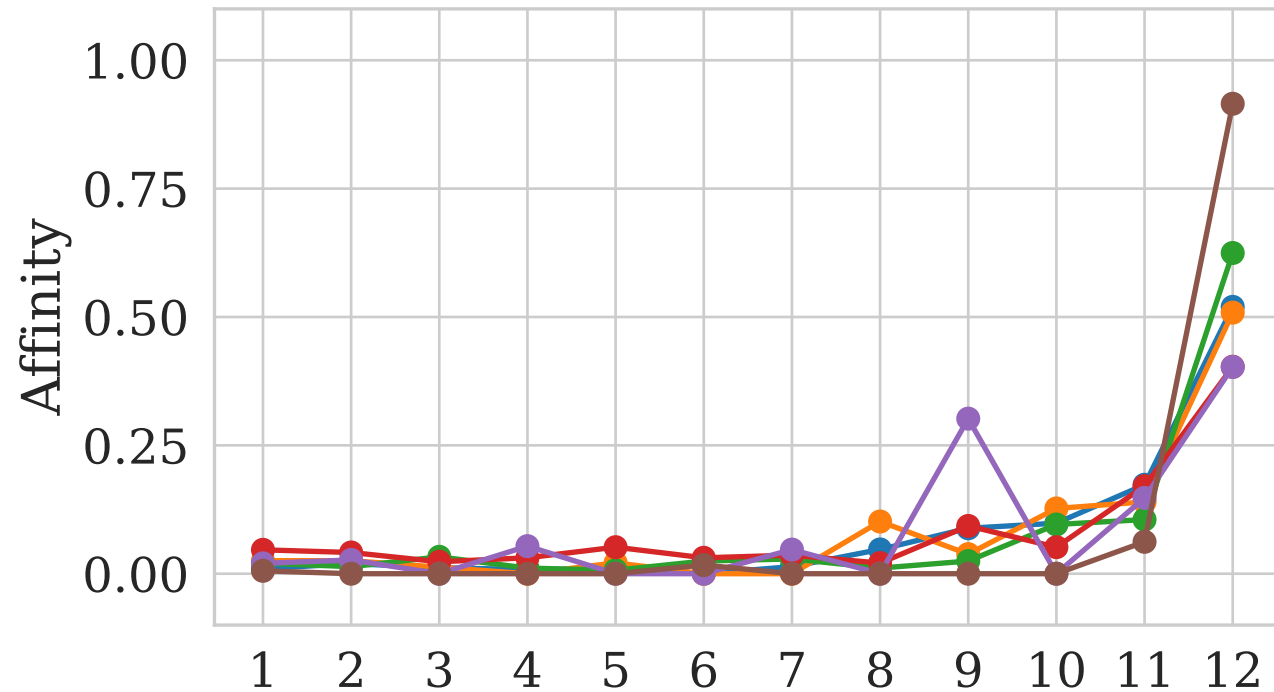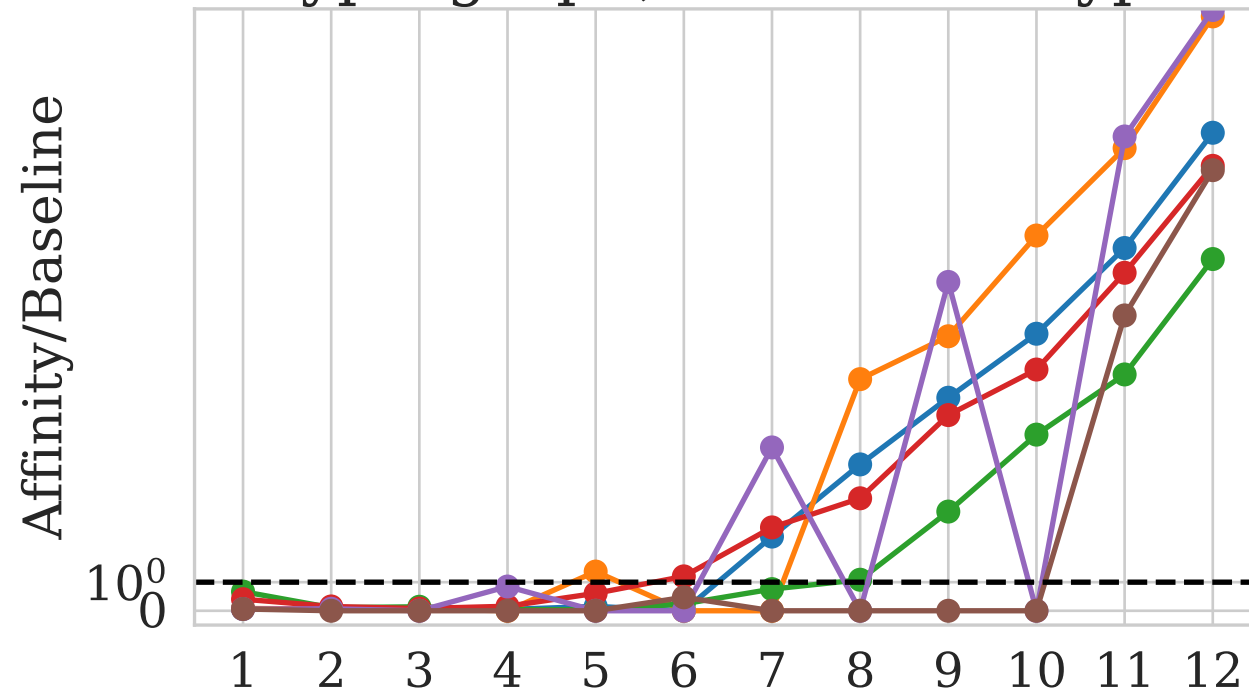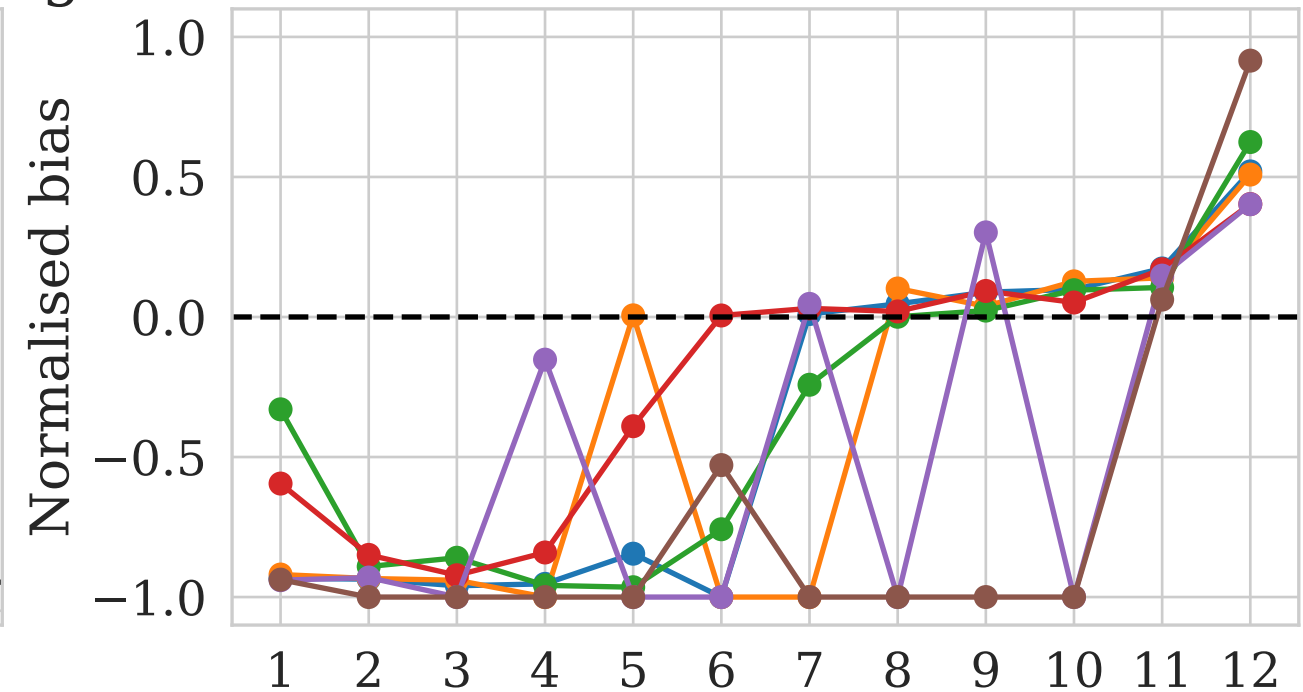

Class 0 Class 1 Class 2 Class 3 Class 4 Class 5

13-uniform hypergraph, number of hyperedges: 145

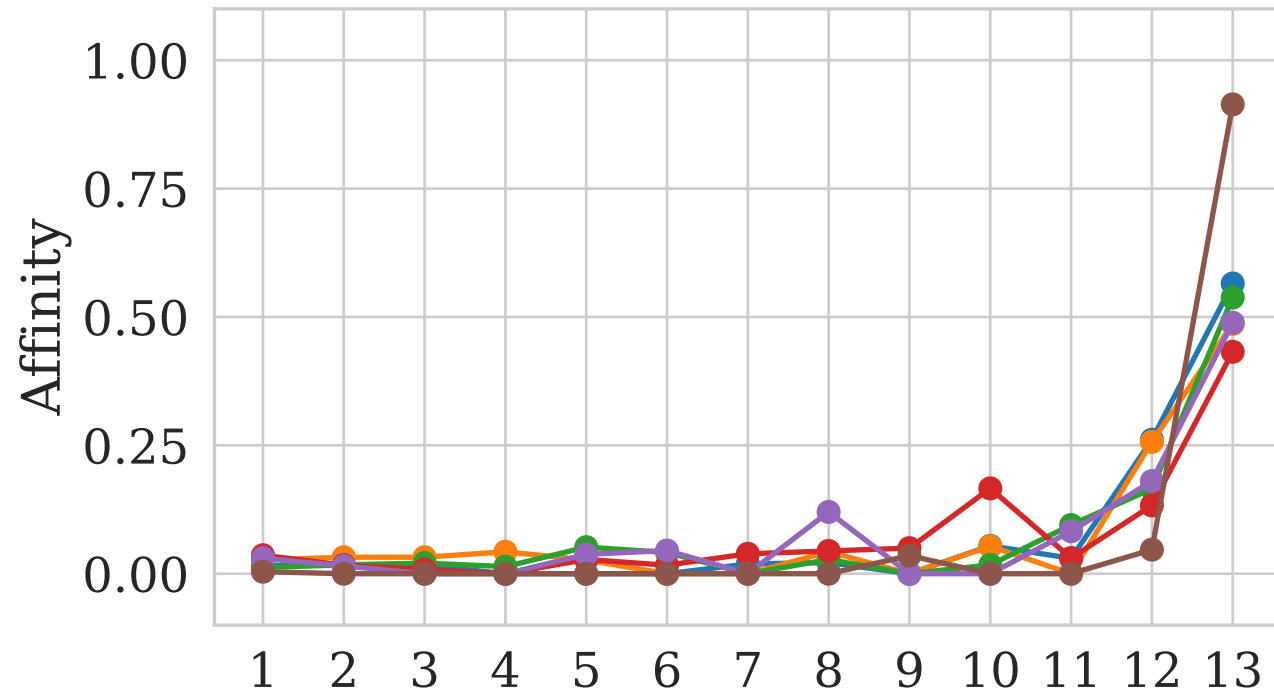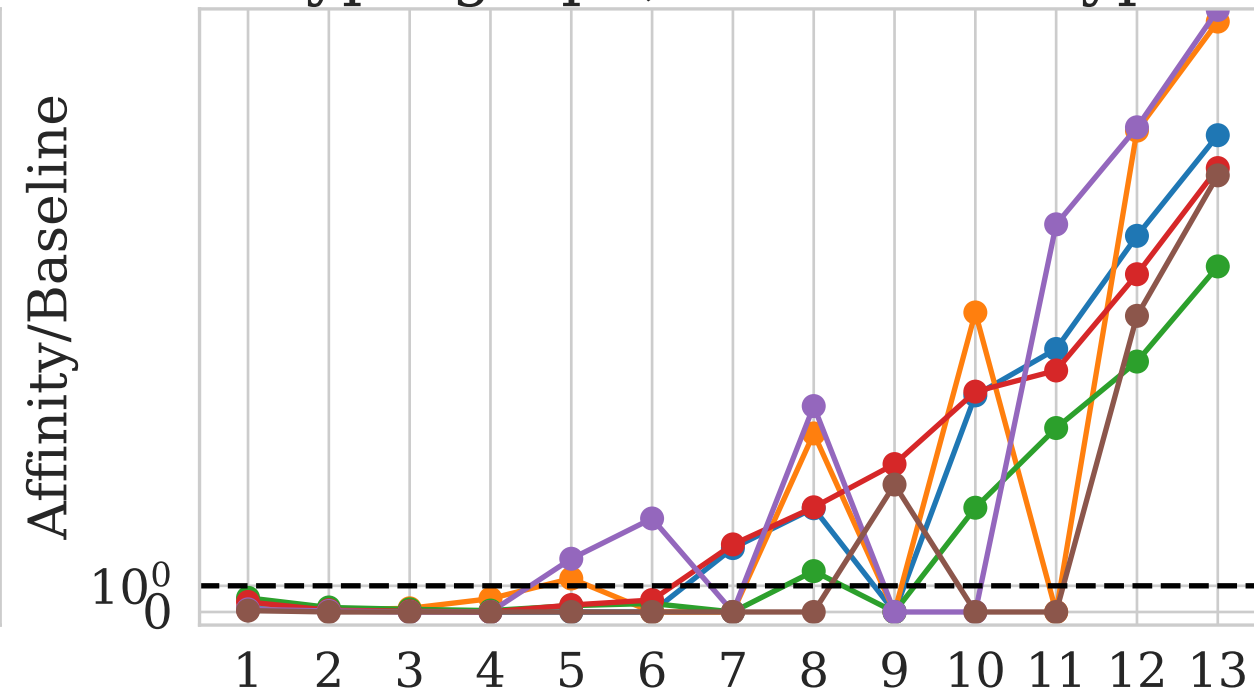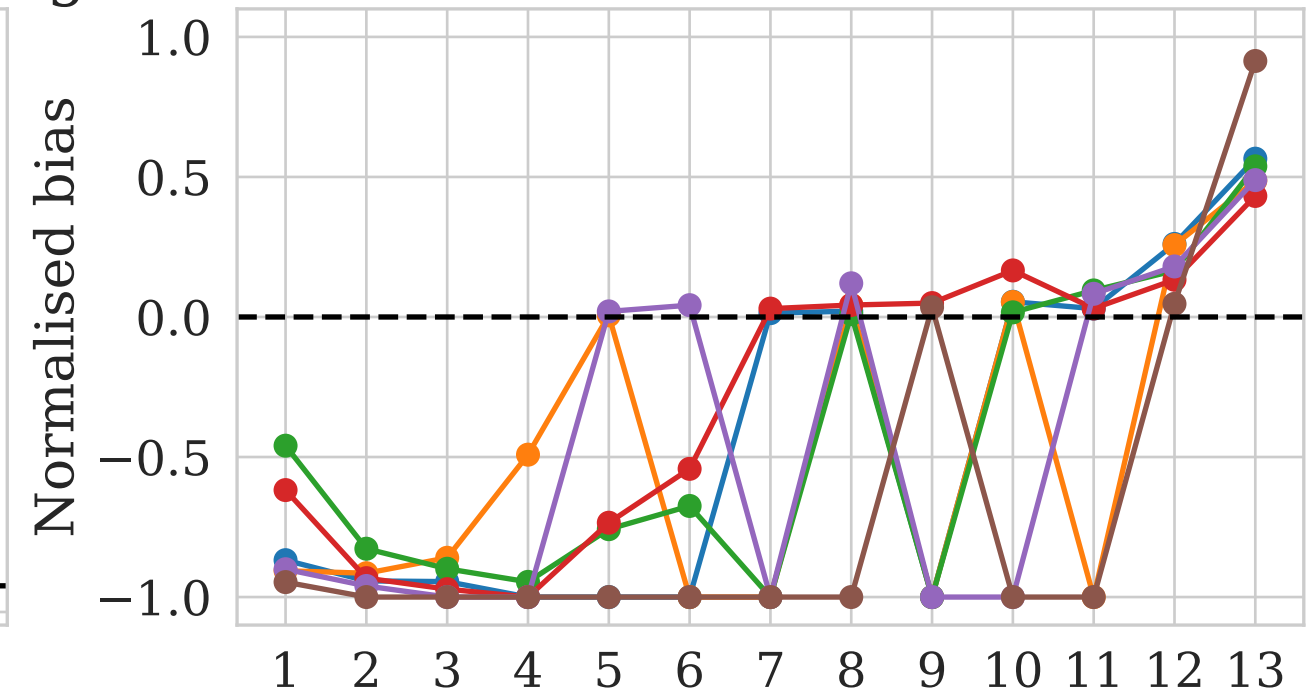

● Class 0   
 ● Class 1   
 ● Class 2   
 ● Class 3   
 ● Class 4   
 ● Class 5

14-uniform hypergraph, number of hyperedges: 121

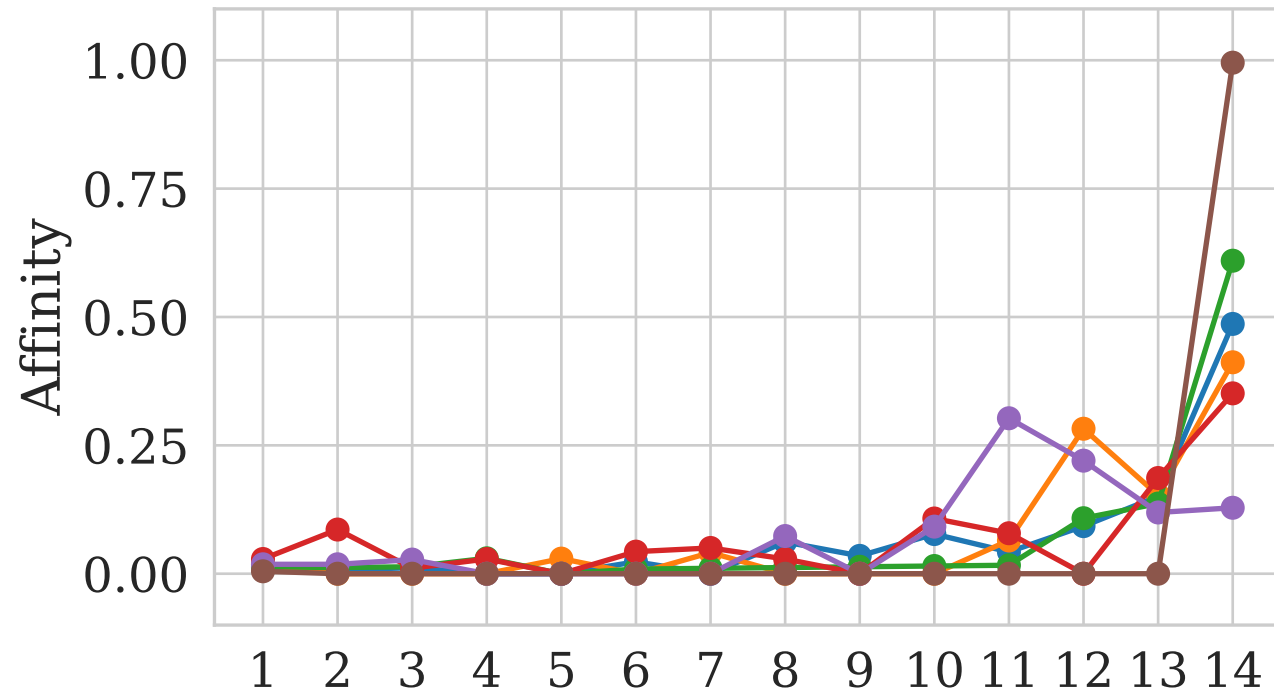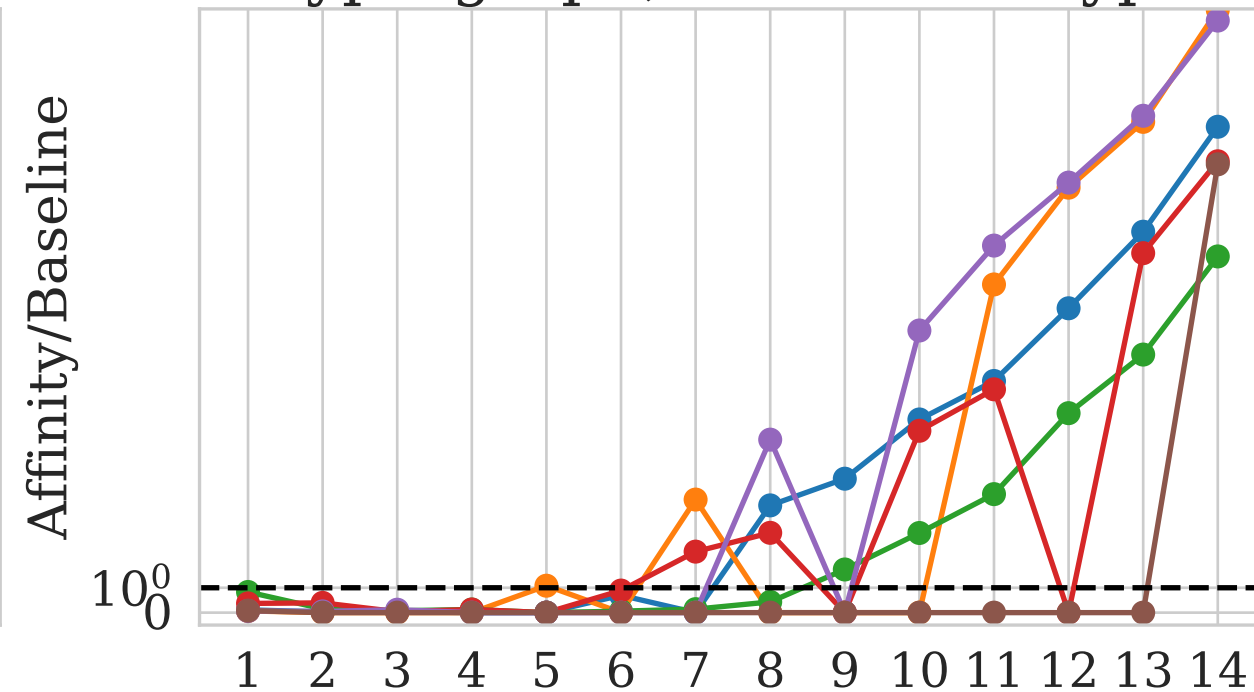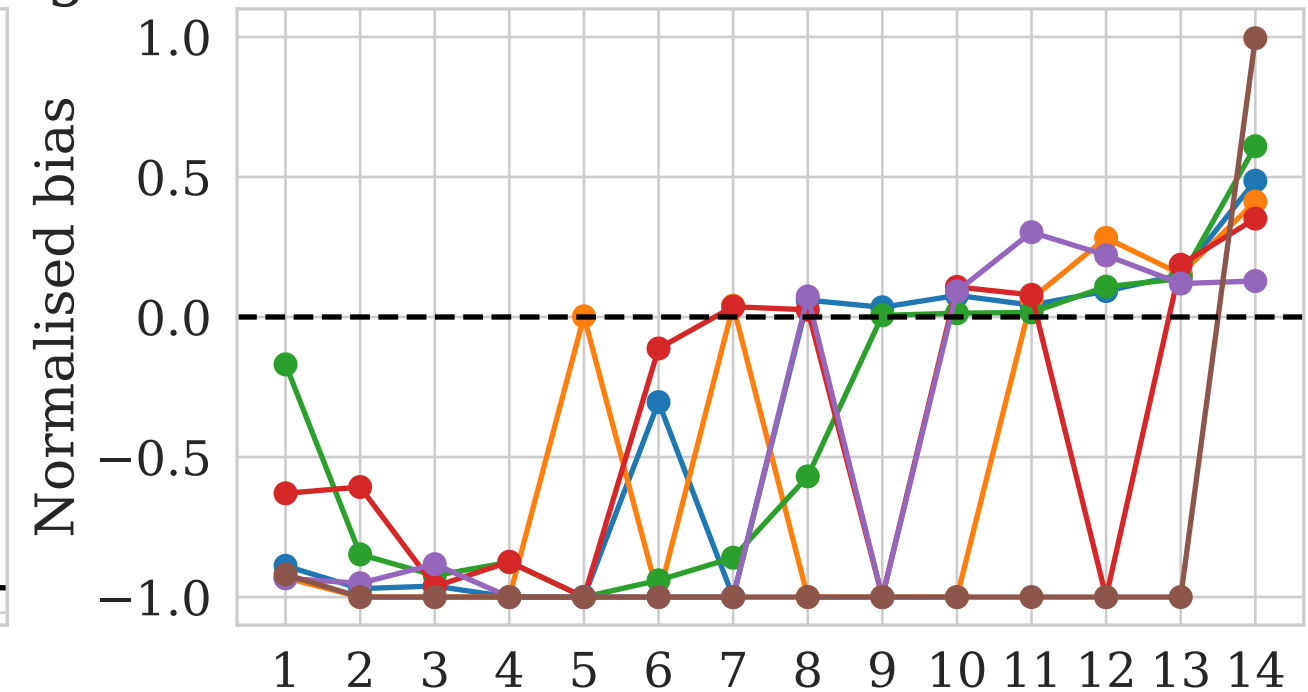

Class 0 Class 1 Class 2 Class 3 Class 4 Class 5

15-uniform hypergraph, number of hyperedges: 114

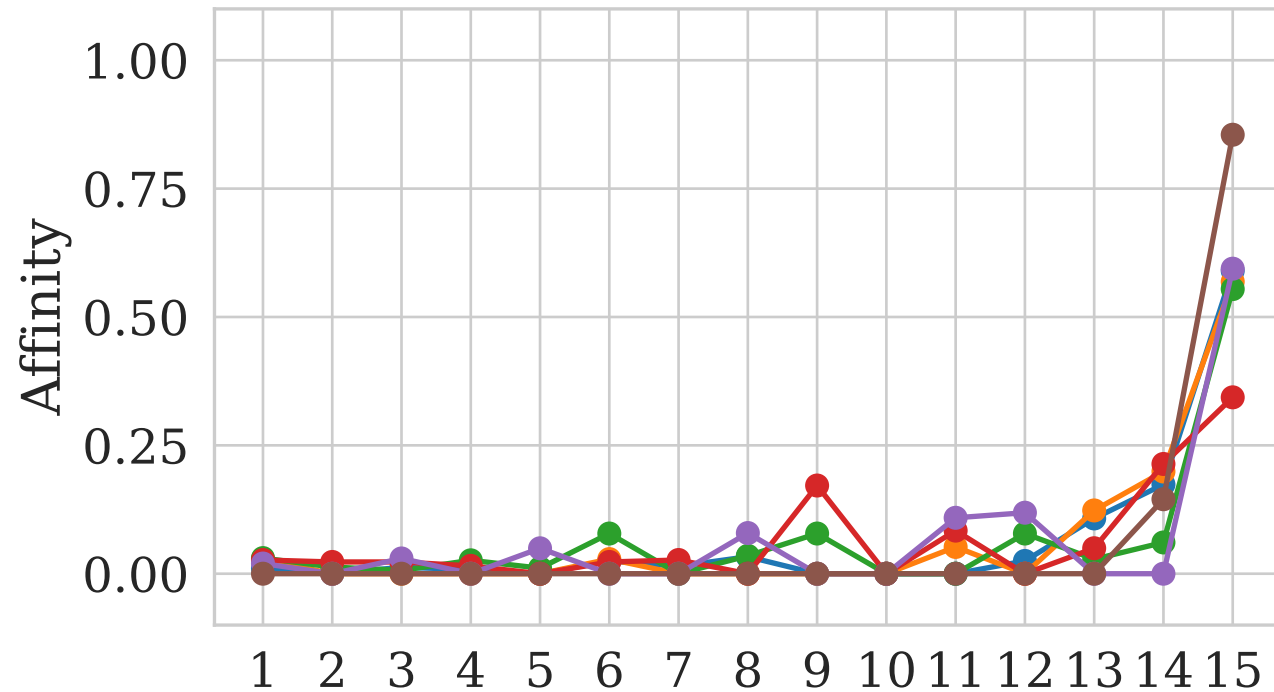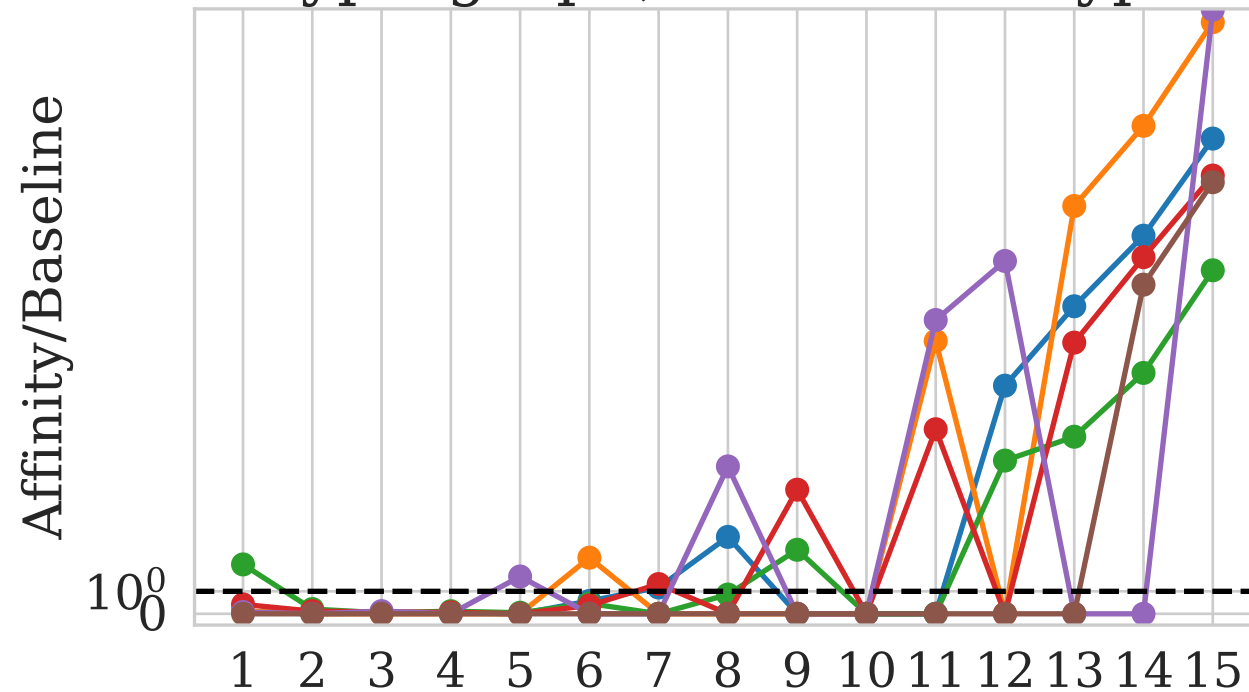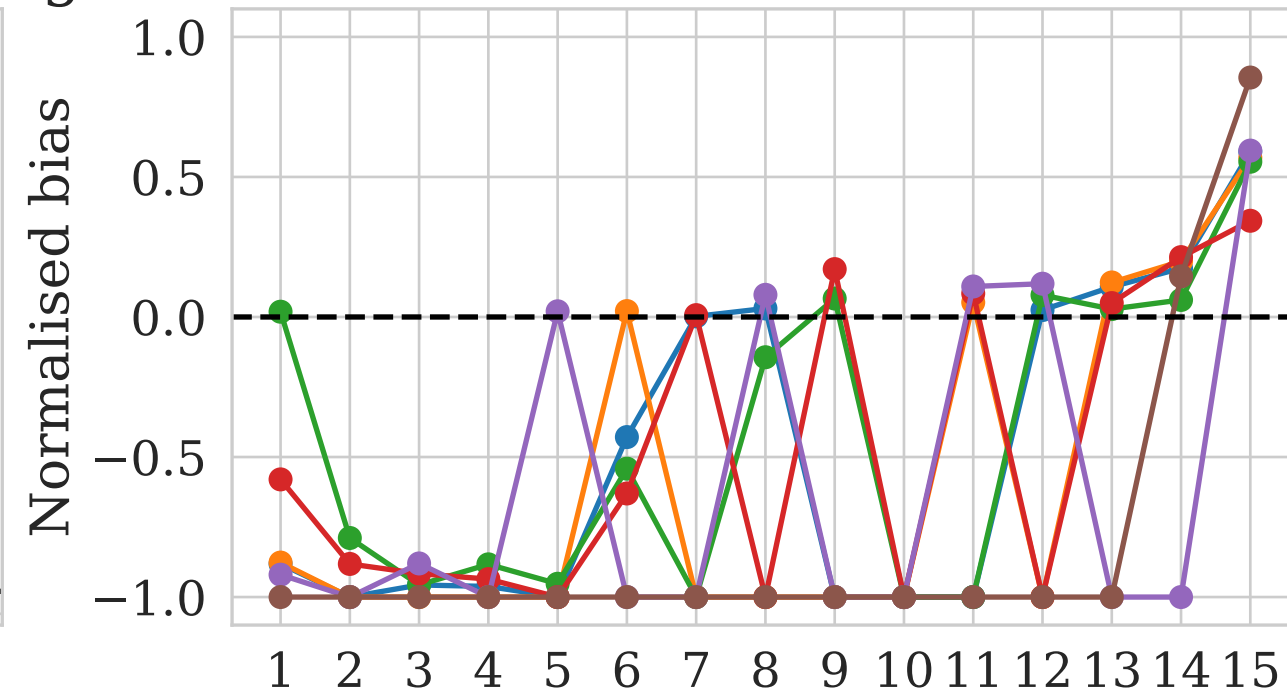

Class 0 Class 1 Class 2 Class 3 Class 4 Class 5

17-uniform hypergraph, number of hyperedges: 91

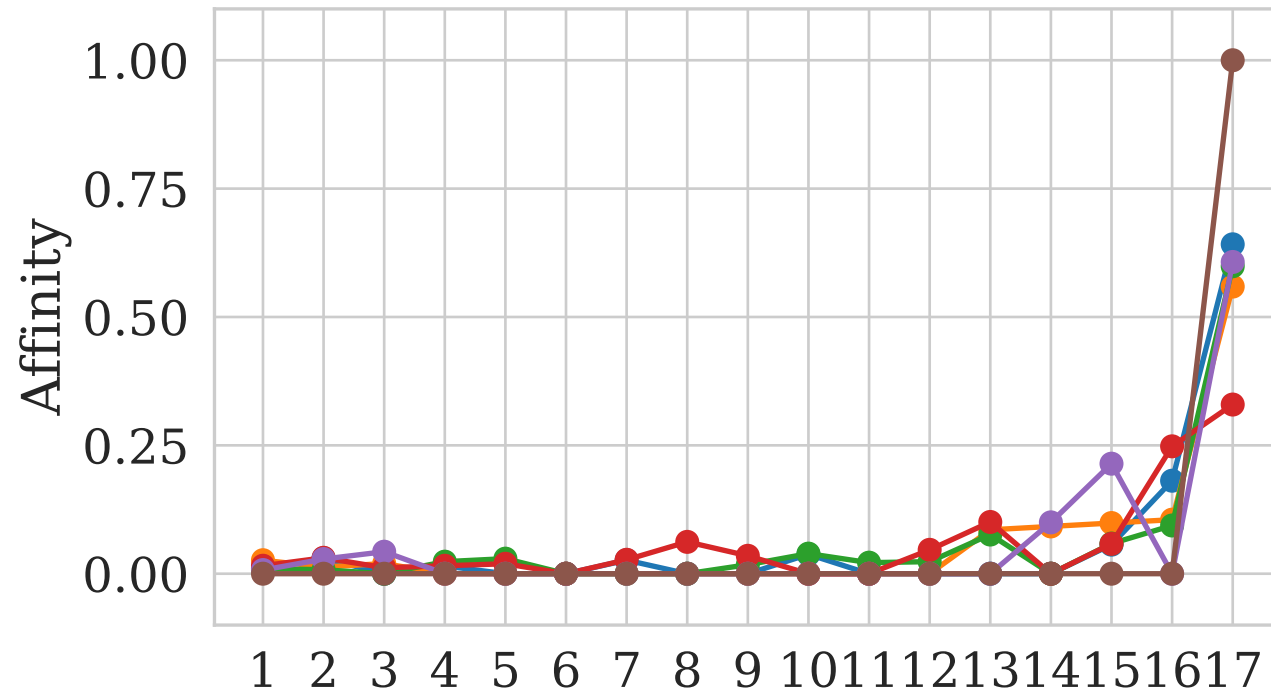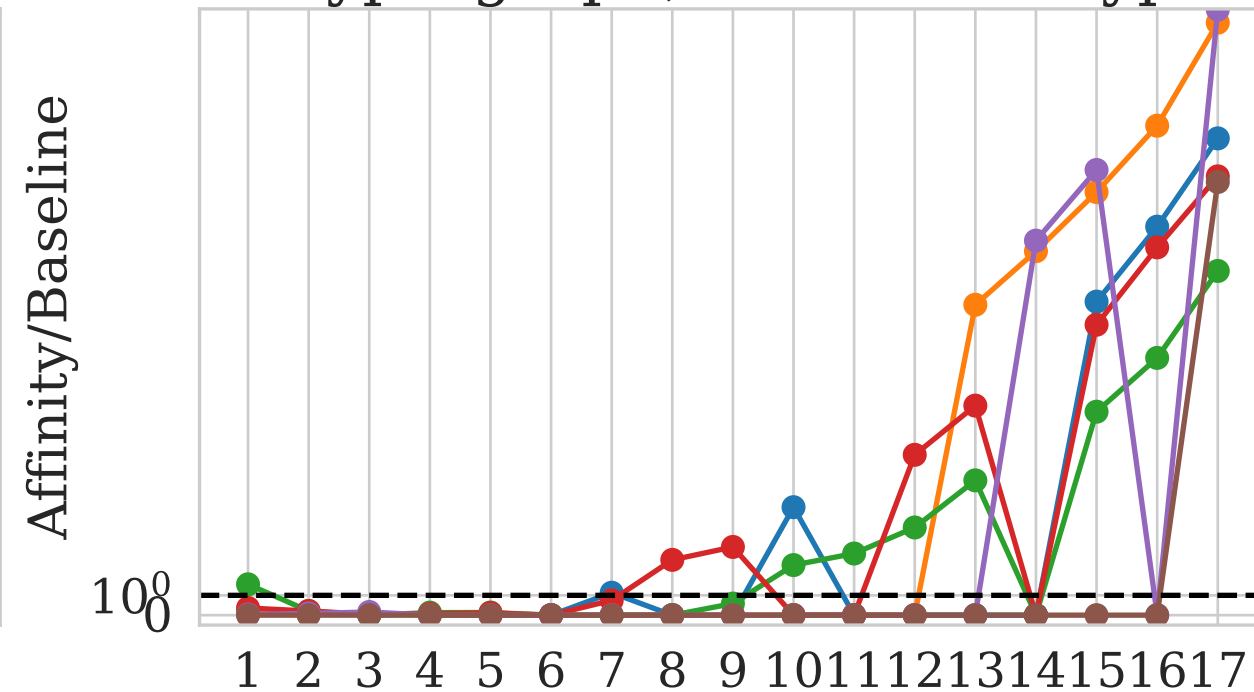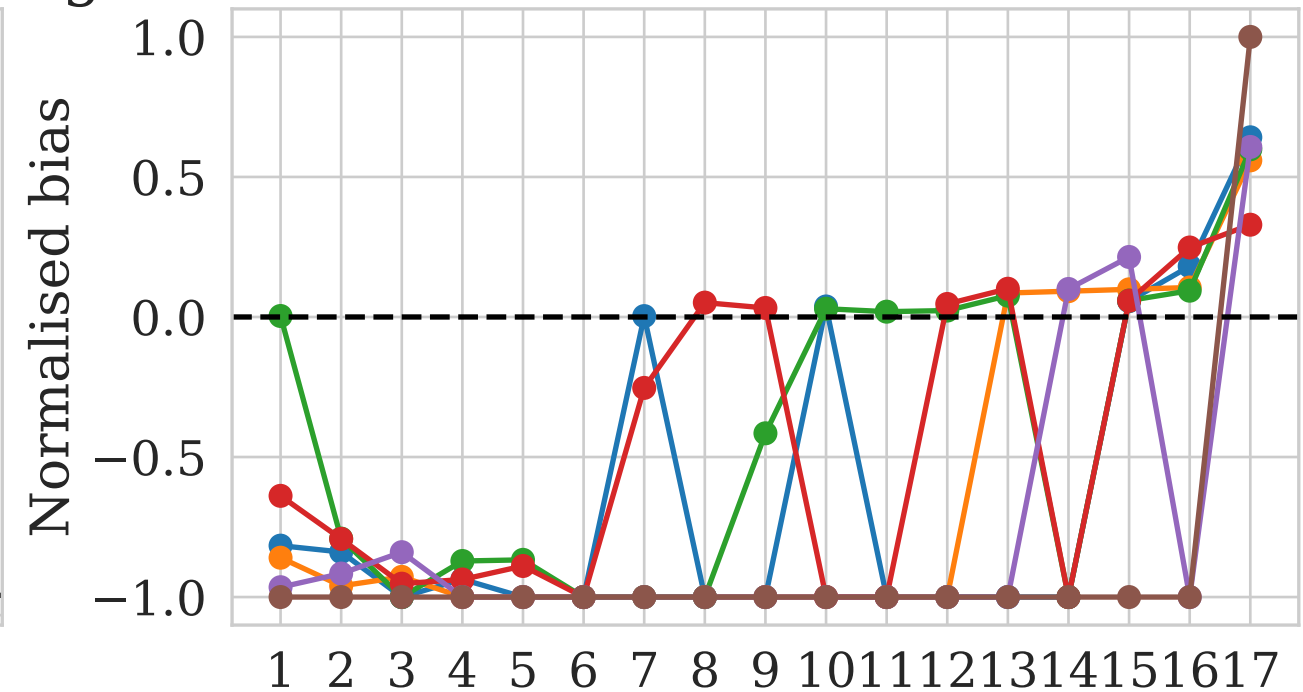

16-uniform hypergraph, number of hyperedges: 81

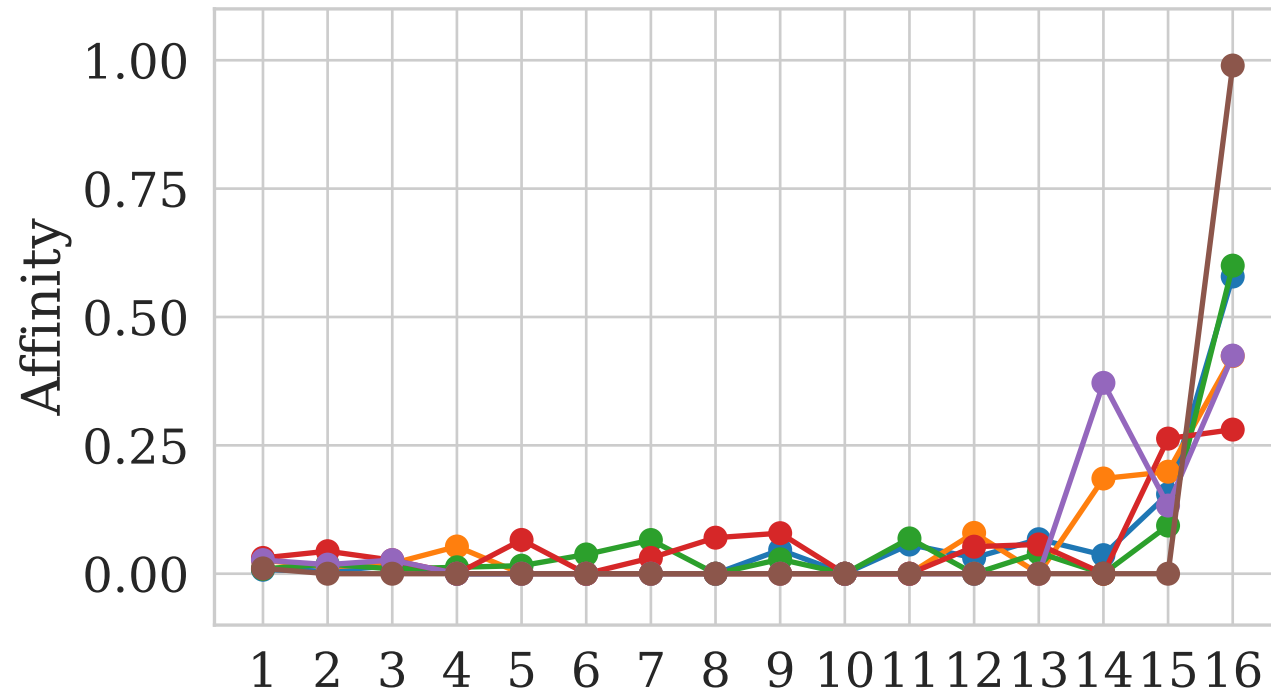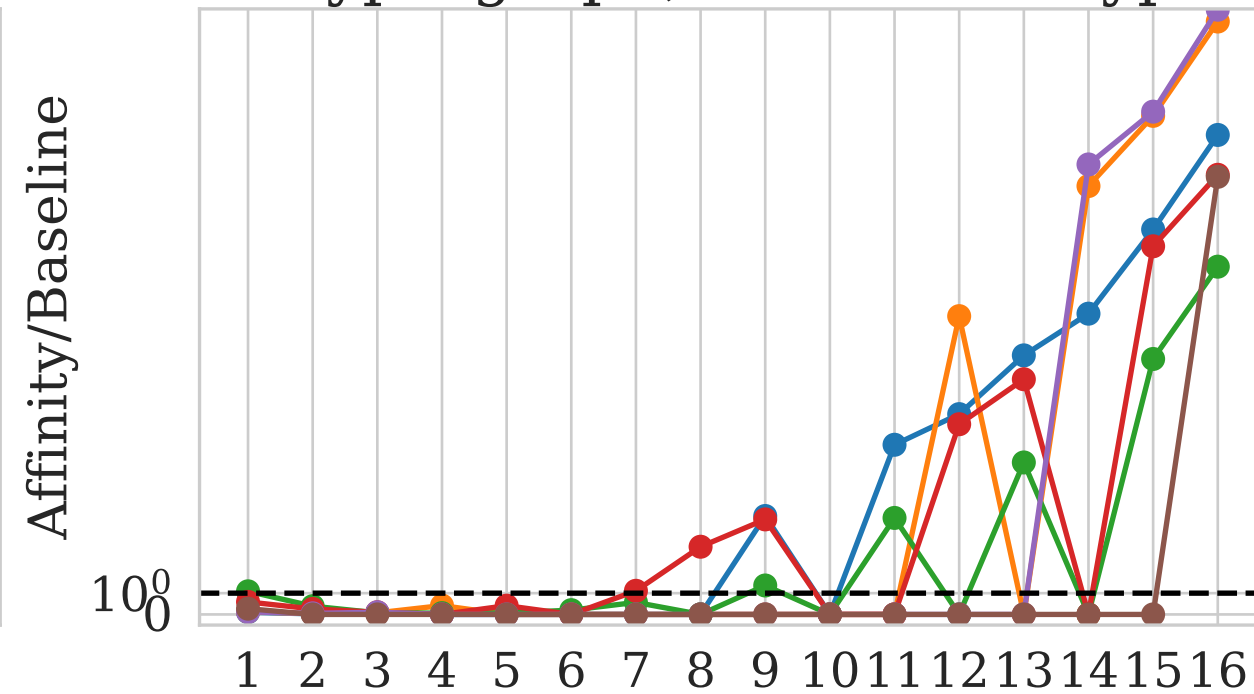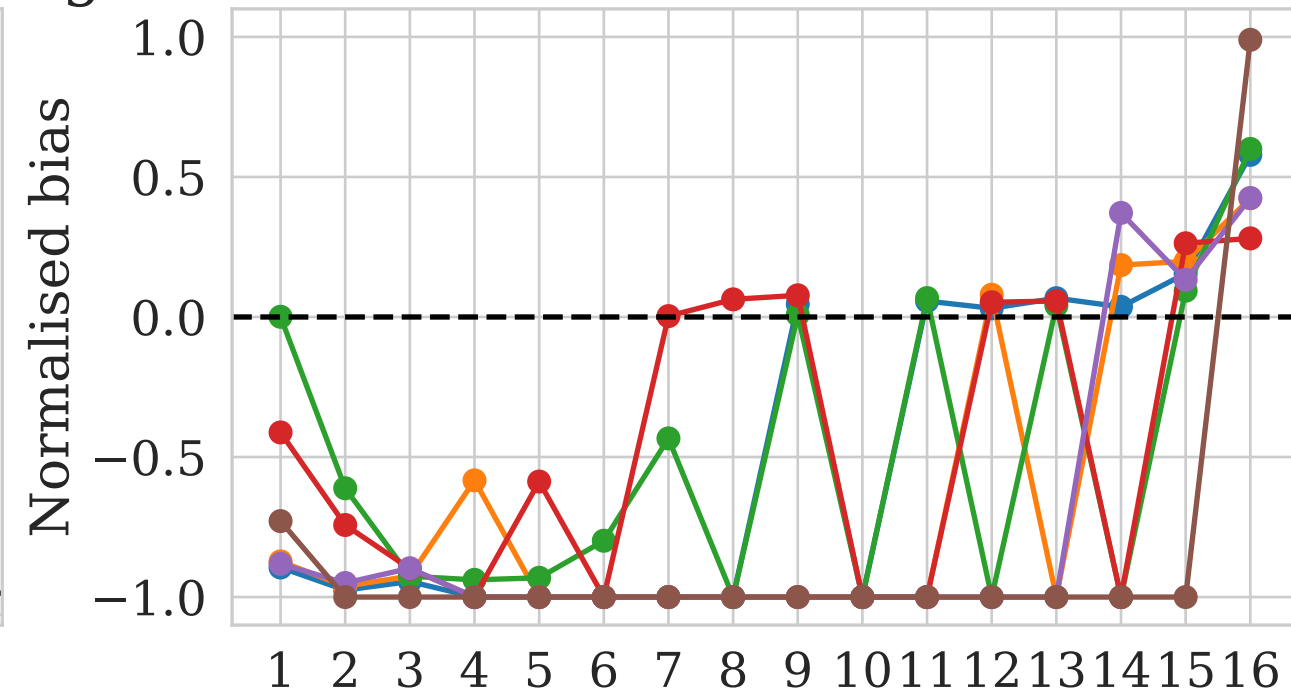

Class 0 Class 1 Class 2 Class 3 Class 4 Class 5



18-uniform hypergraph, number of hyperedges: 66

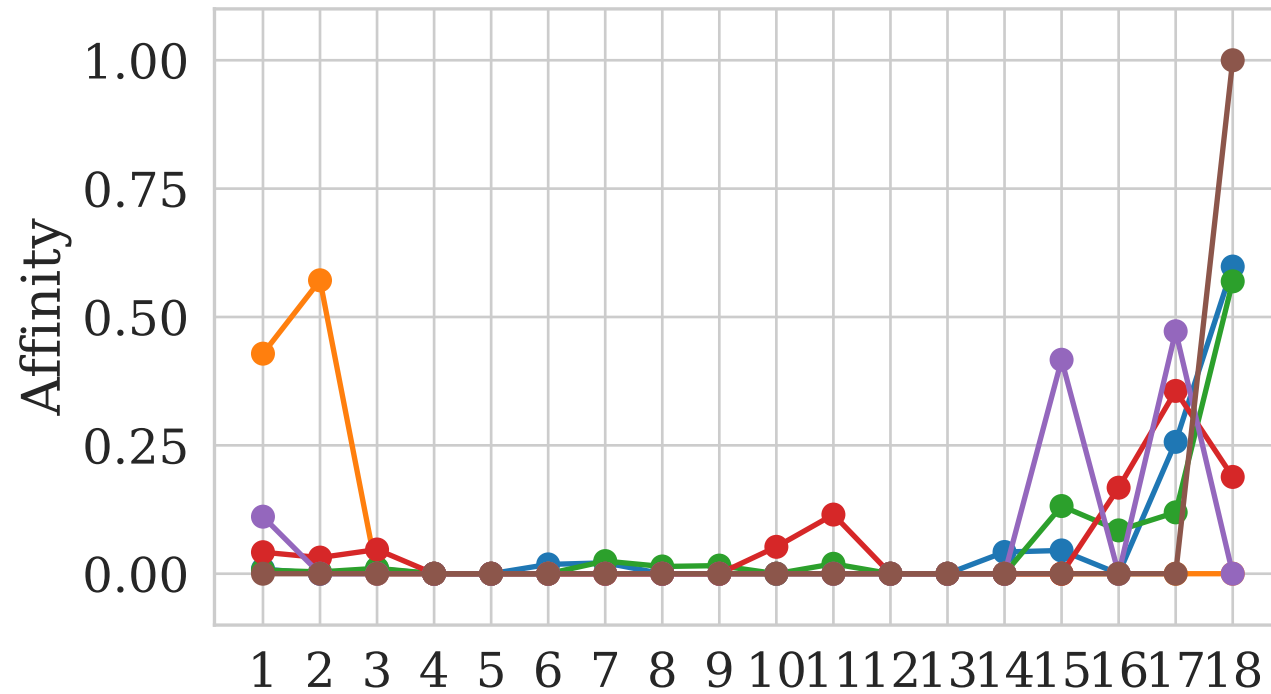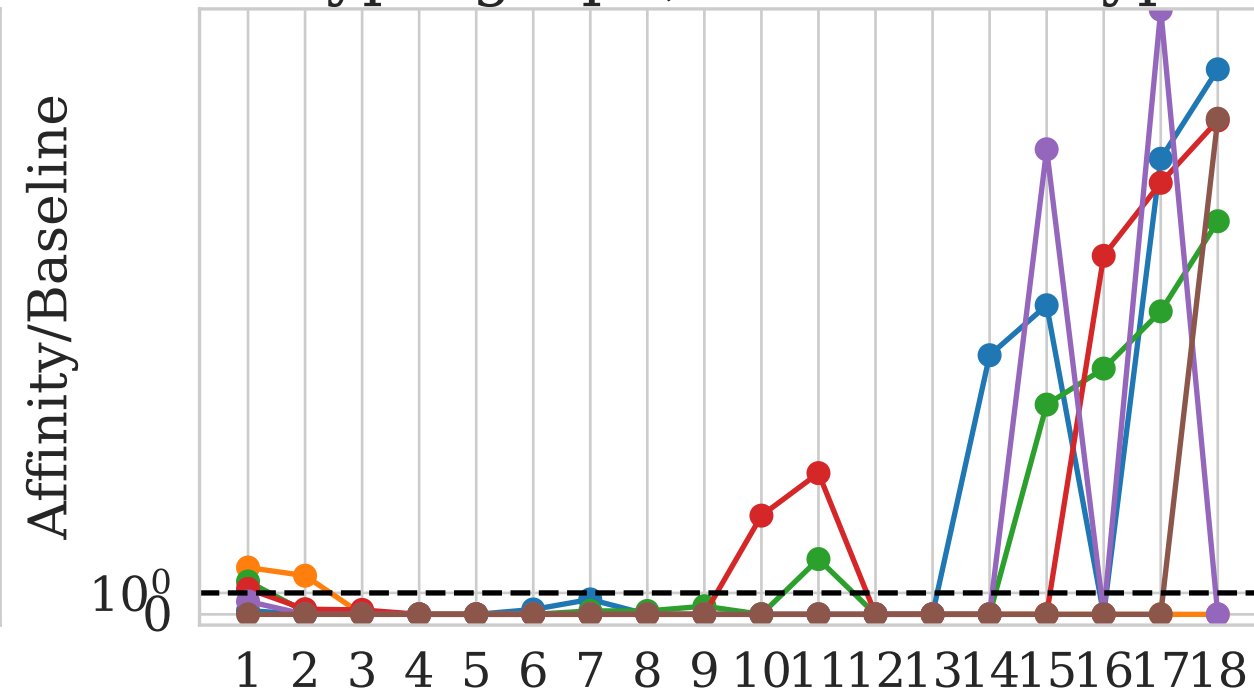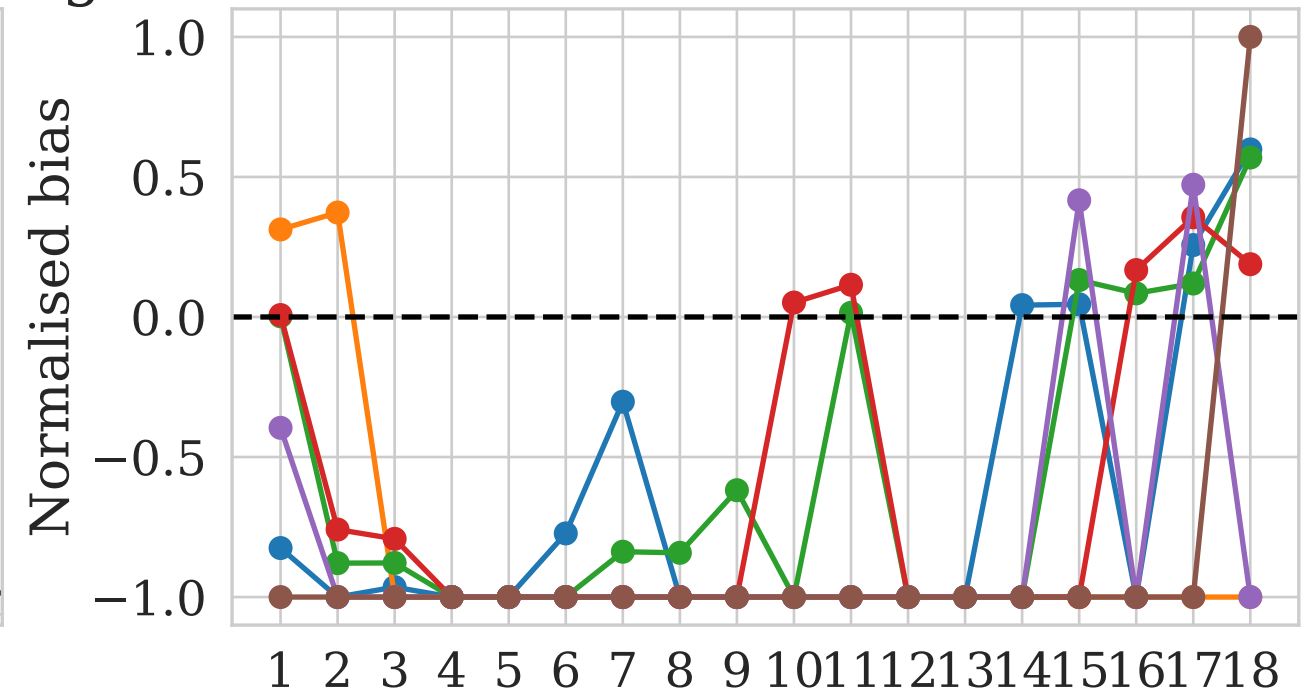

Class 0 Class 1 Class 2 Class 3 Class 4 Class 5

19-uniform hypergraph, number of hyperedges: 59

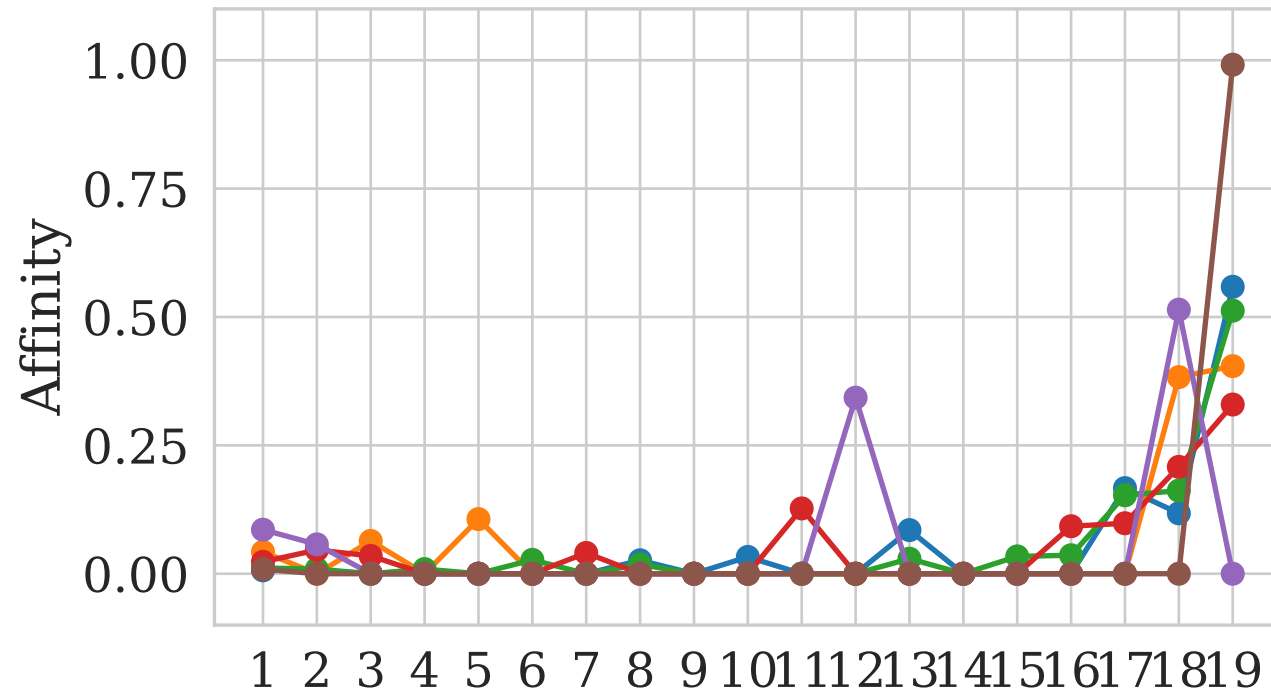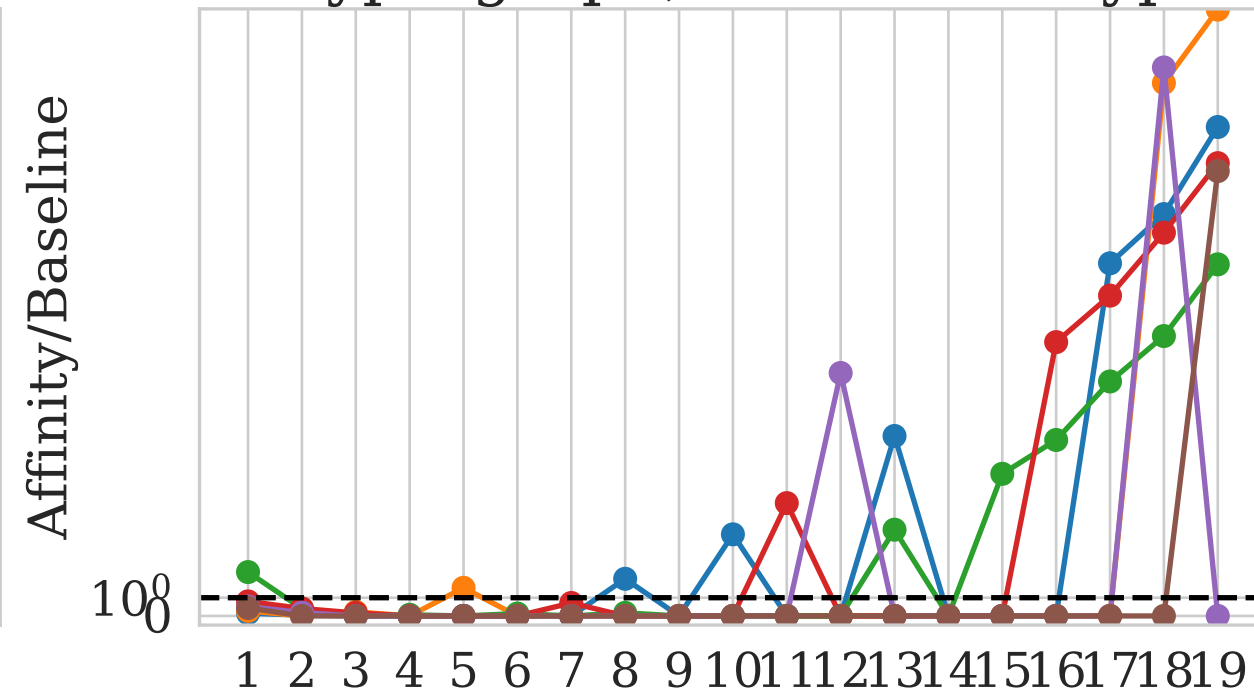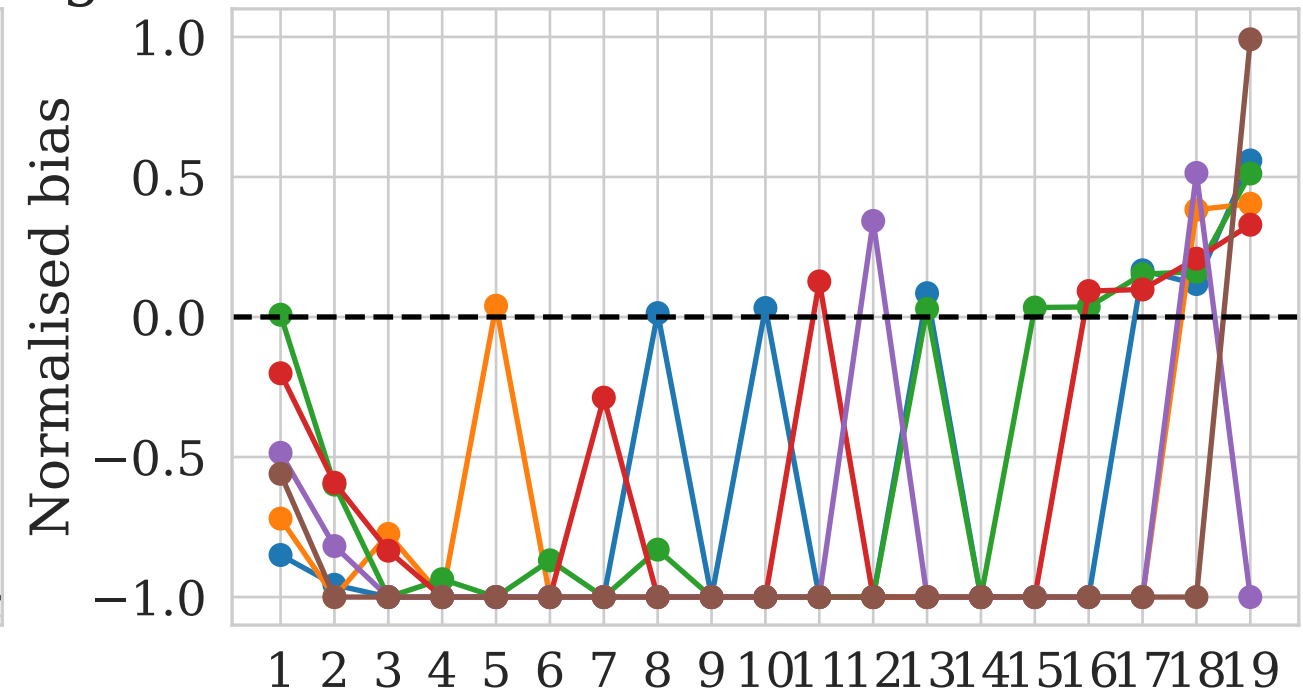

● Class 0
 ● Class 1
 ● Class 2
 ● Class 3
 ● Class 4
 ● Class 5

20-uniform hypergraph, number of hyperedges: 48

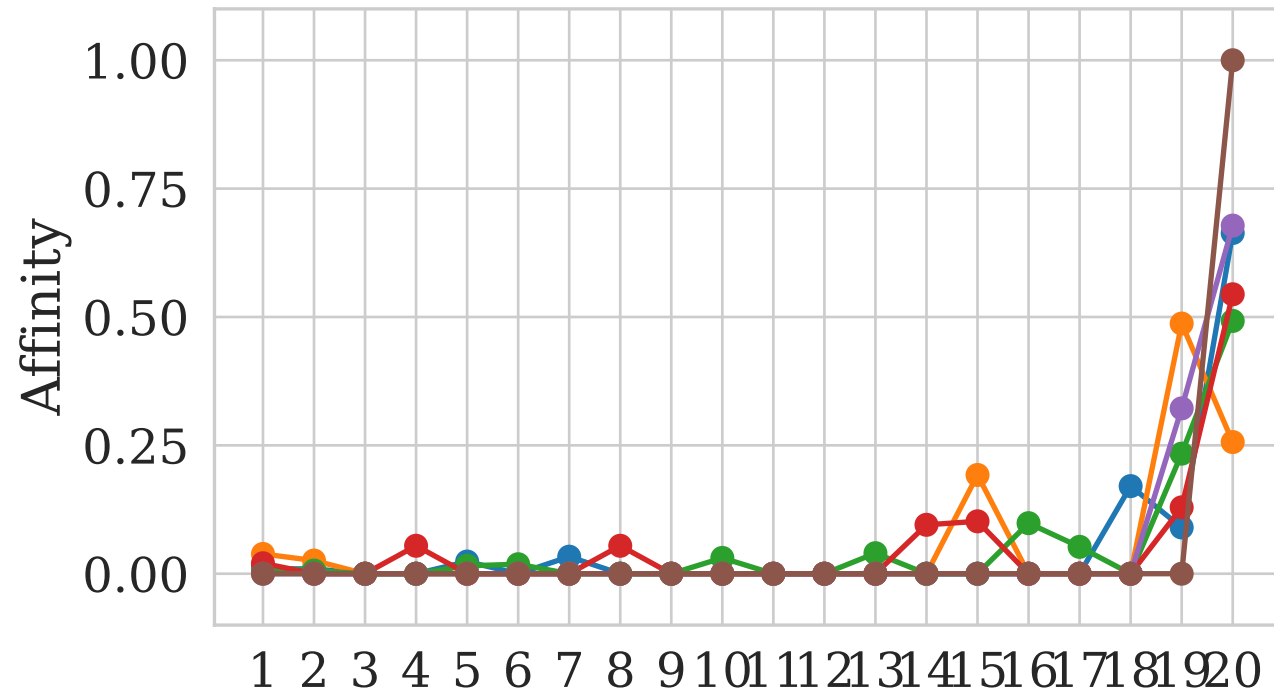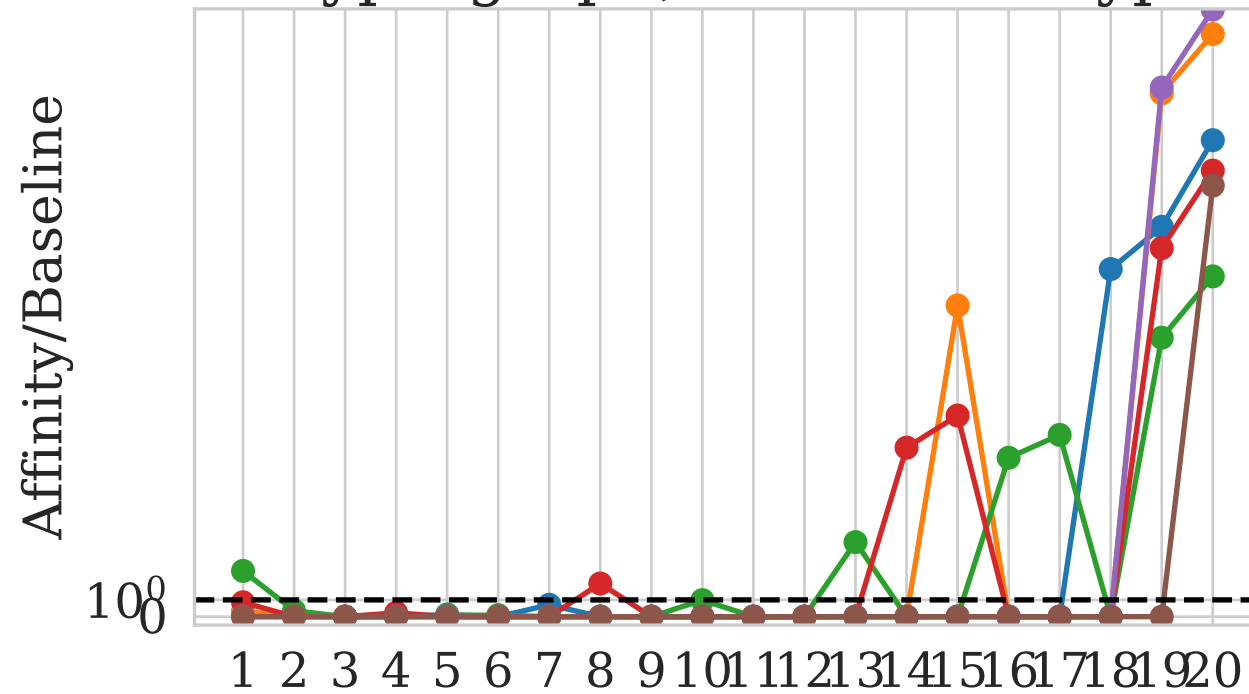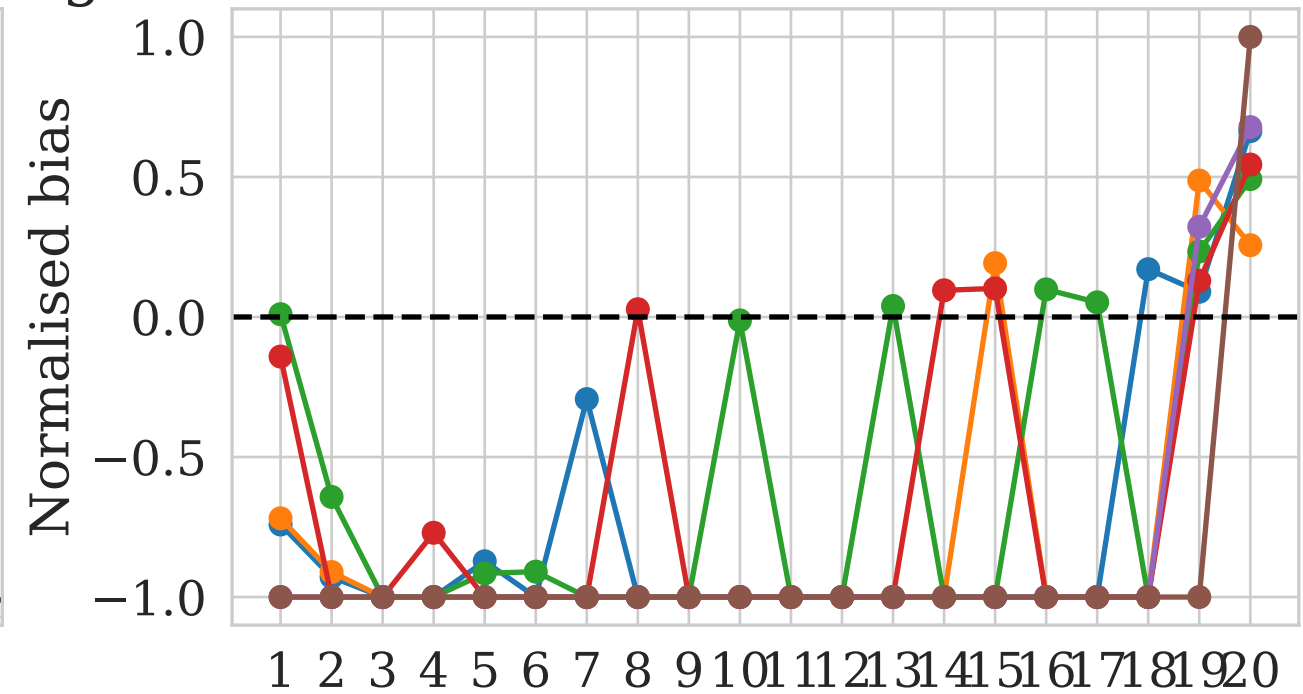

Class 0 Class 1 Class 2 Class 3 Class 4 Class 5

21-uniform hypergraph, number of hyperedges: 47

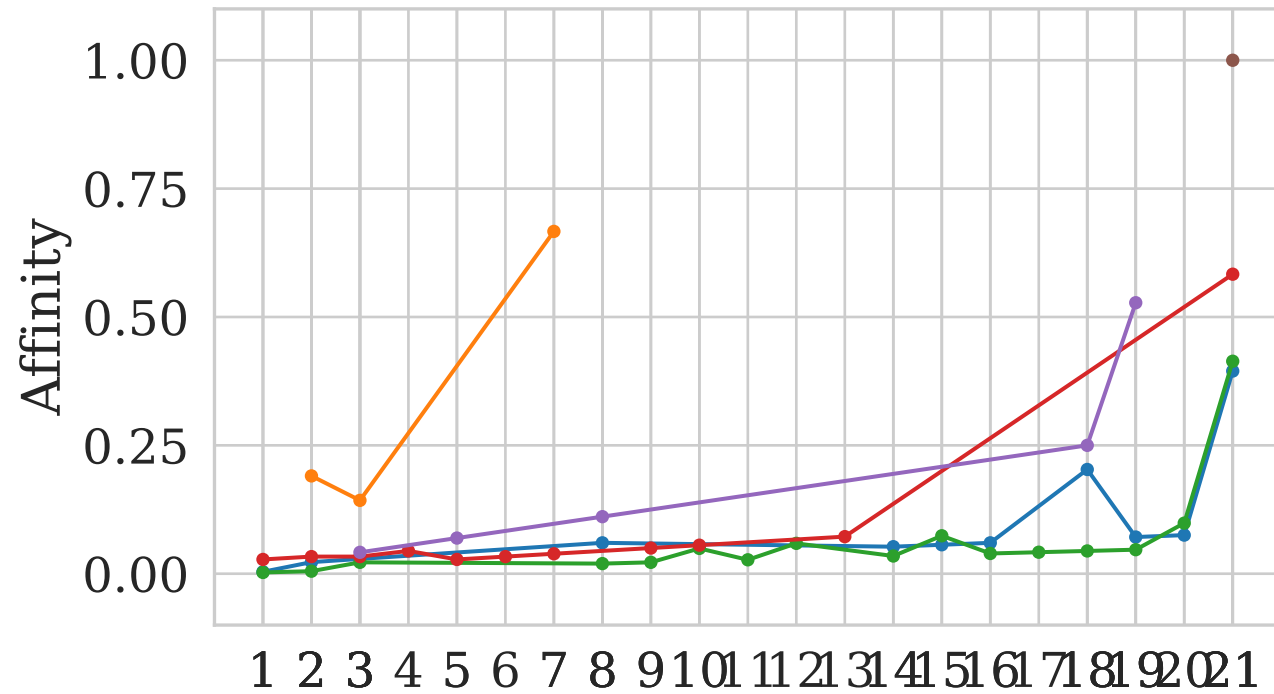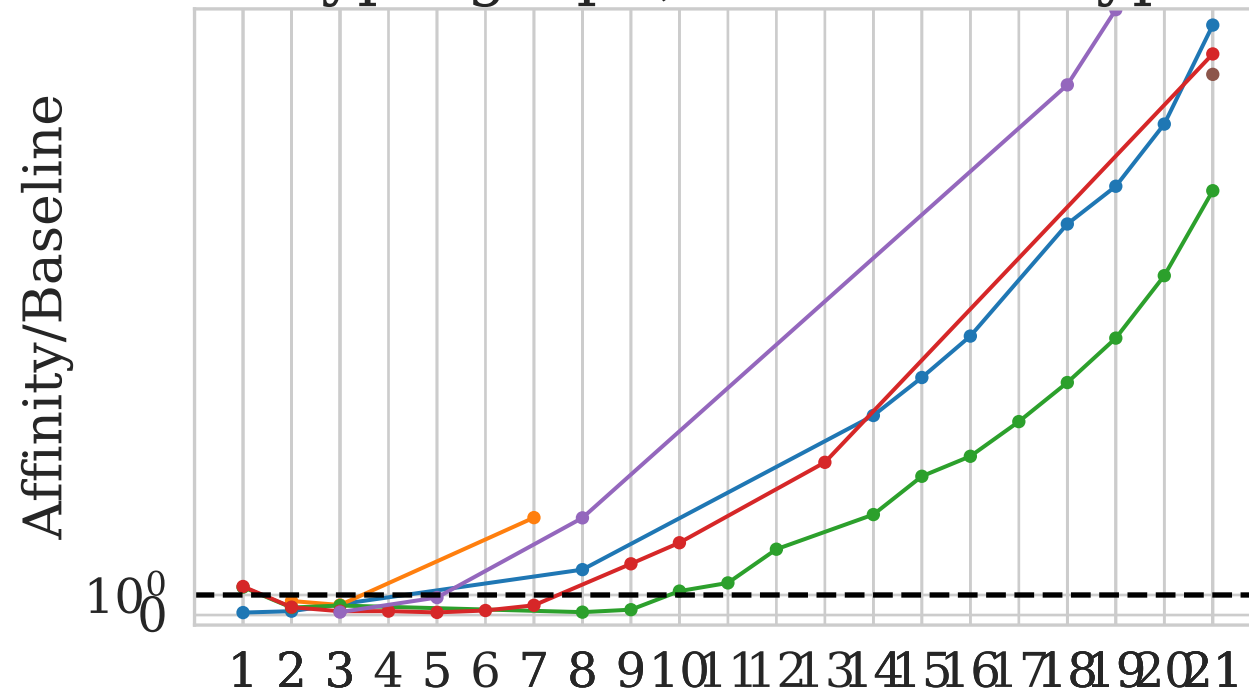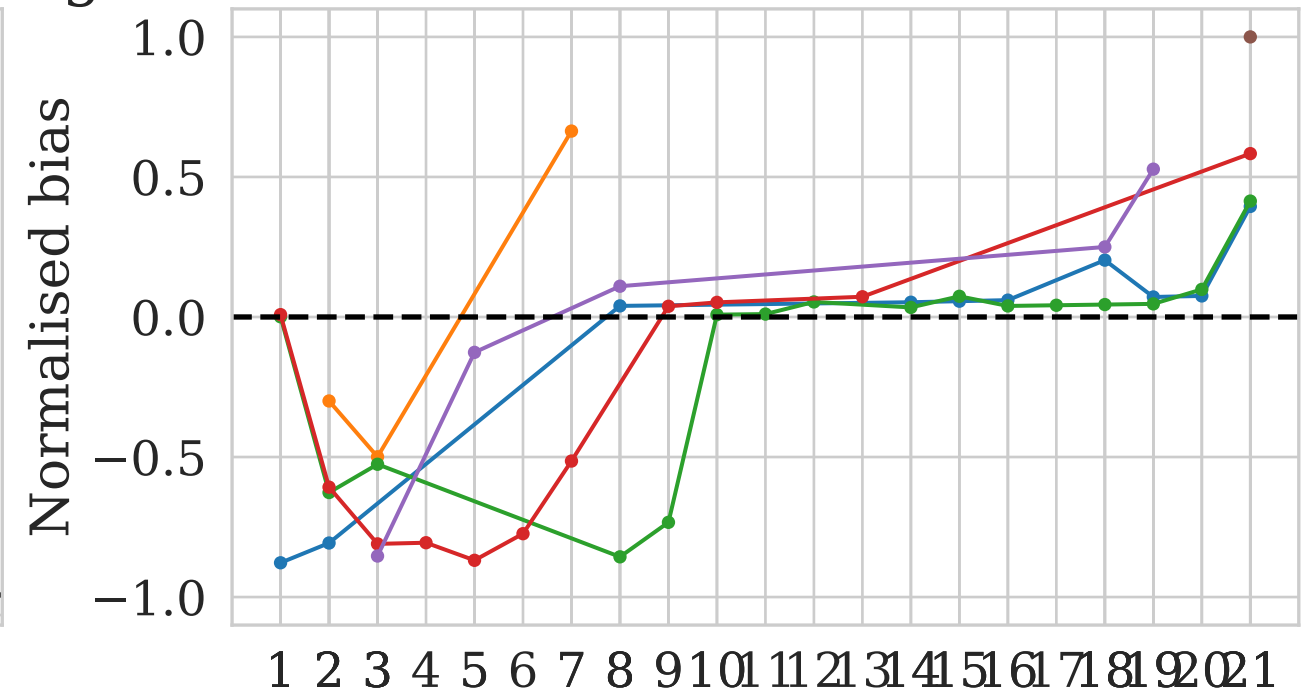

Class 0 Class 1 Class 2 Class 3 Class 4 Class 5

22-uniform hypergraph, number of hyperedges: 41

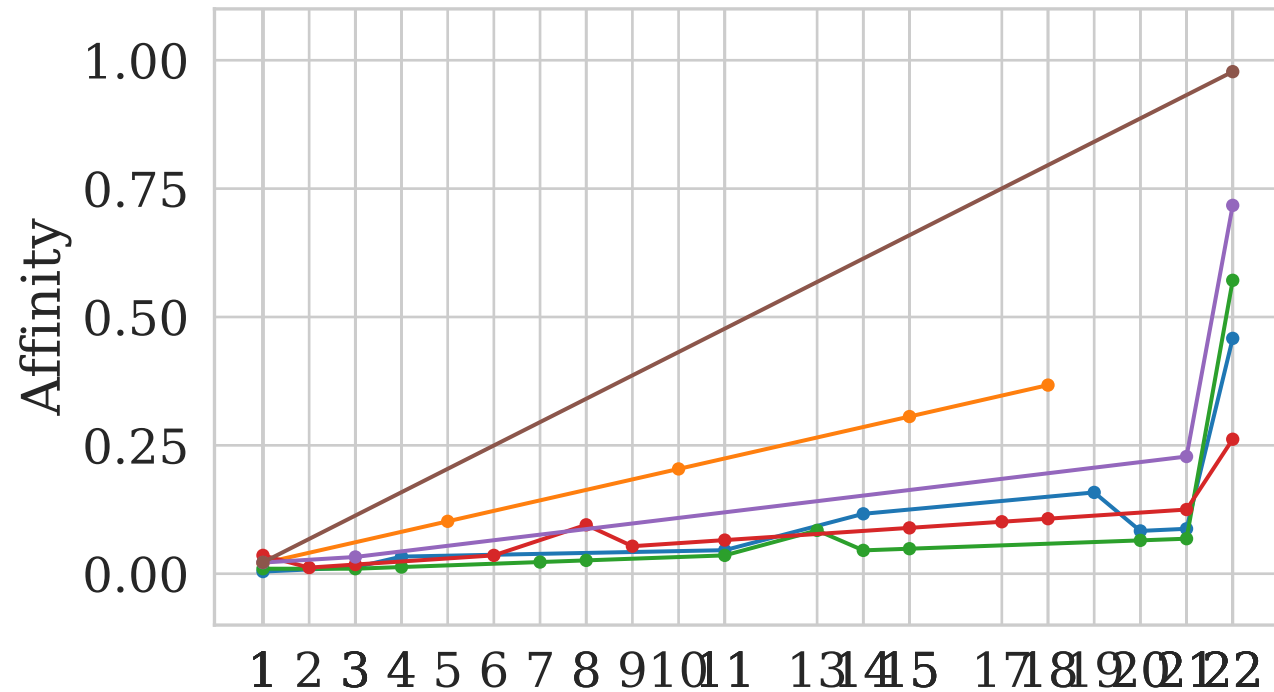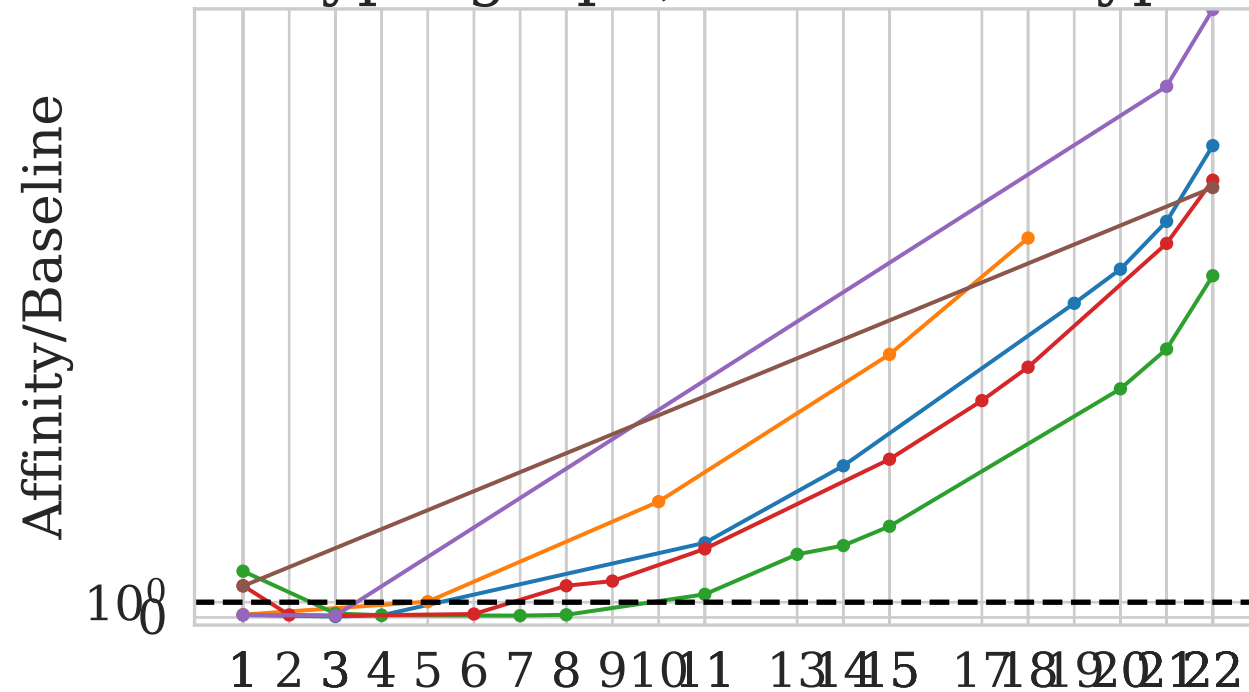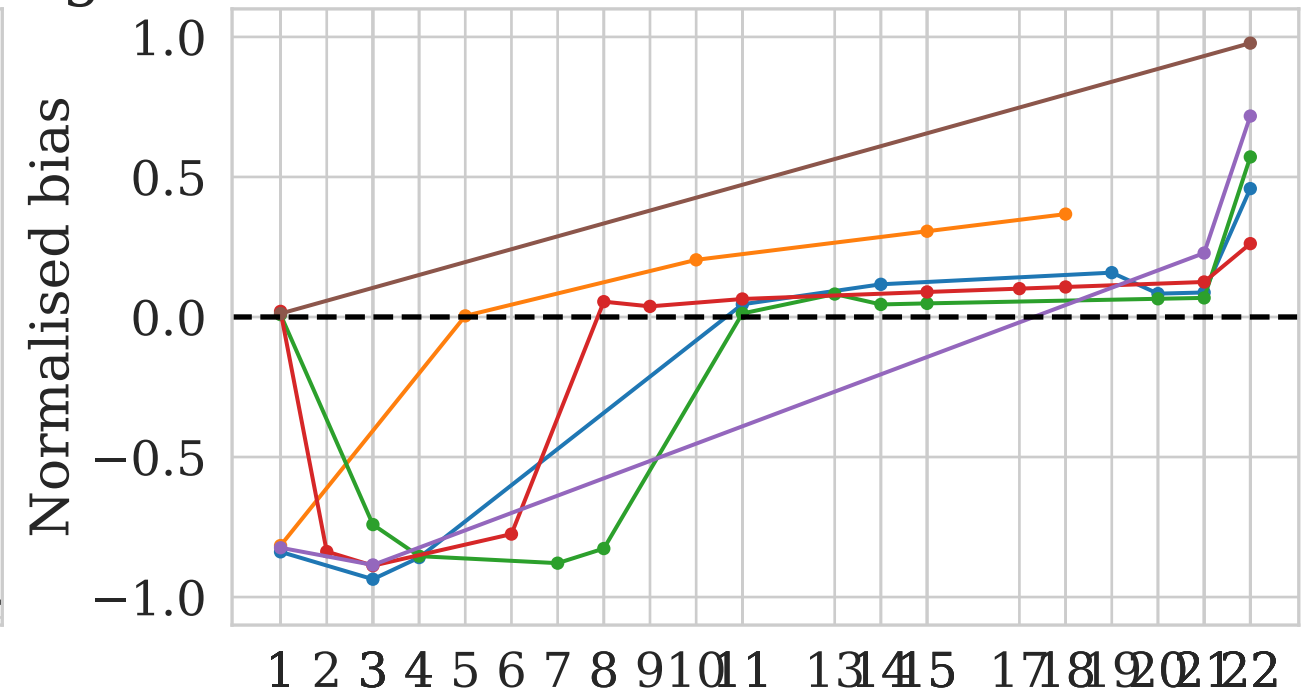

Class 0 Class 1 Class 2 Class 3 Class 4 Class 5

23-uniform hypergraph, number of hyperedges: 33

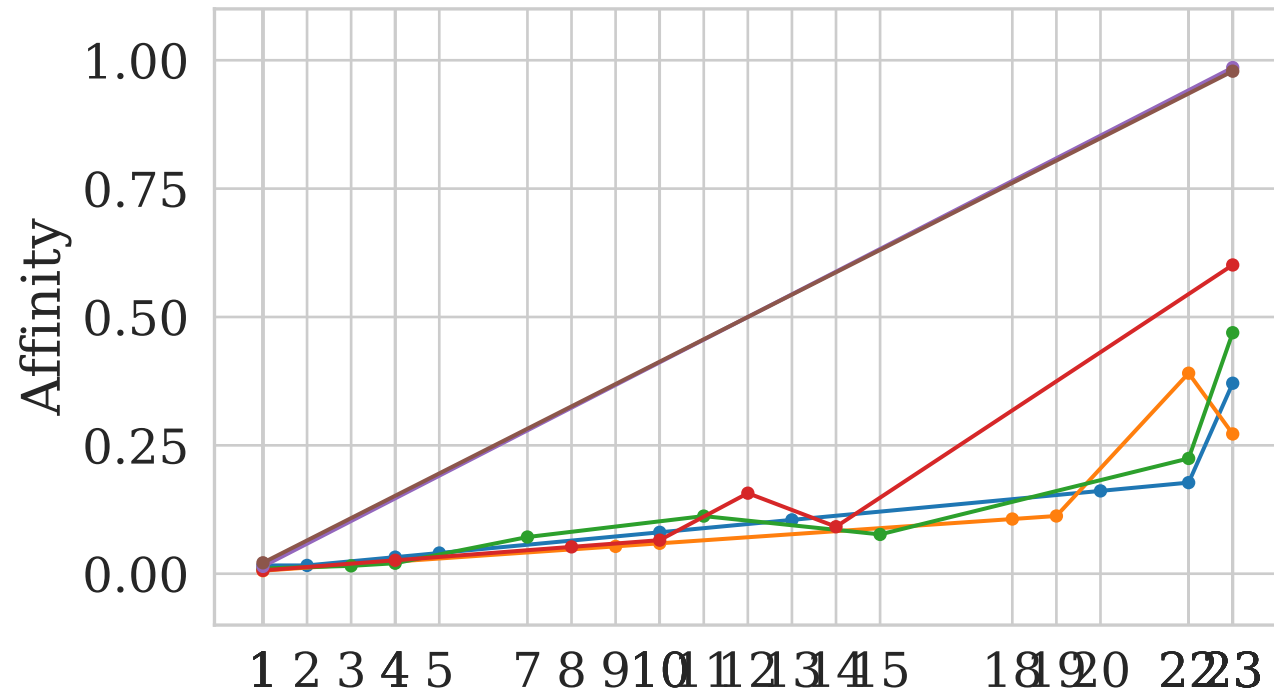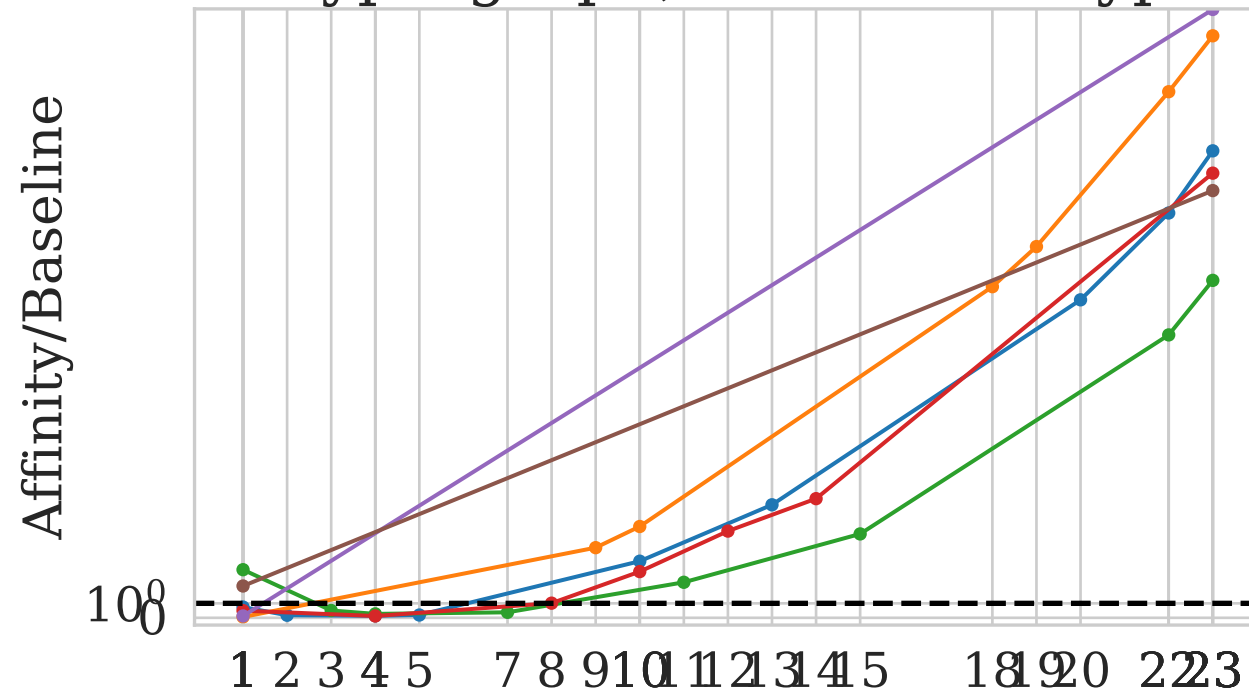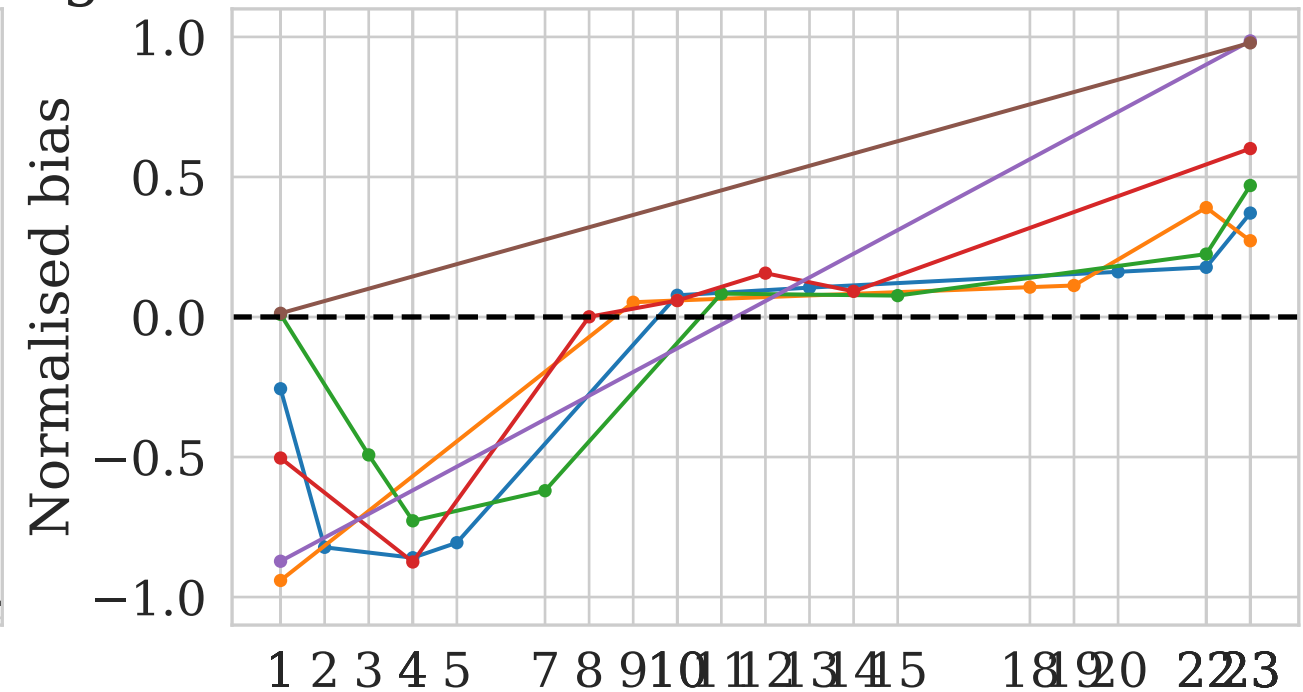

Class 0 Class 1 Class 2 Class 3 Class 4 Class 5

24-uniform hypergraph, number of hyperedges: 33

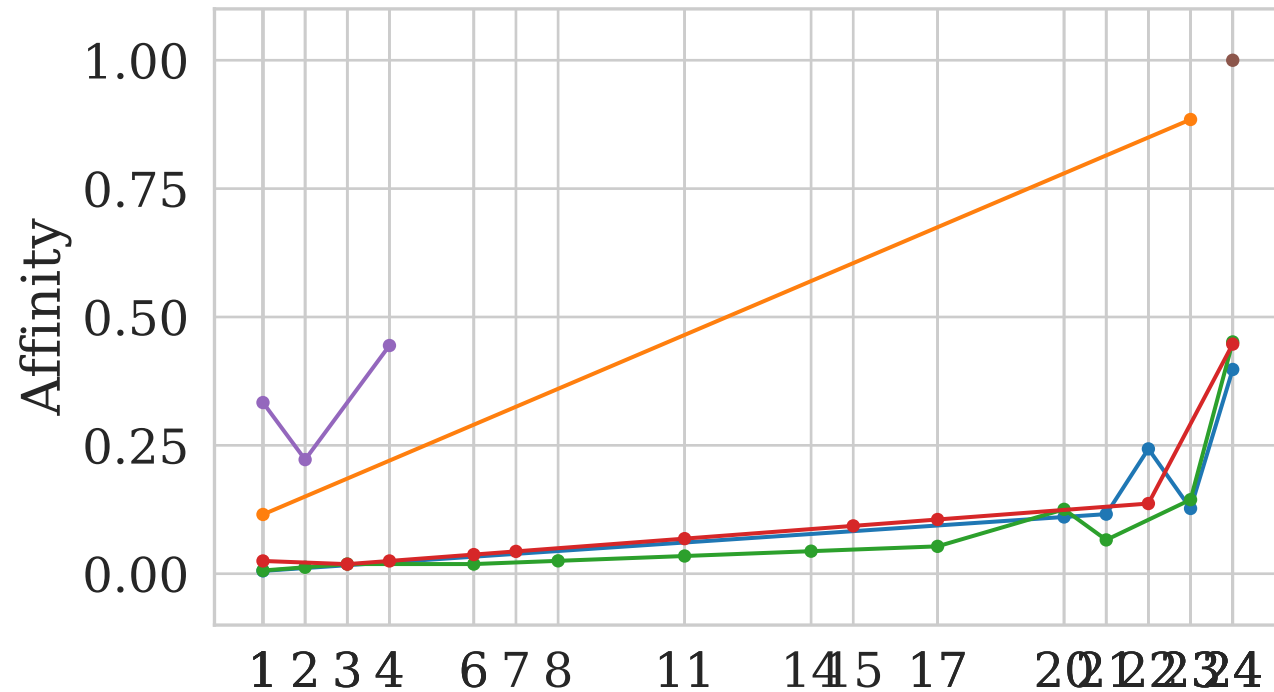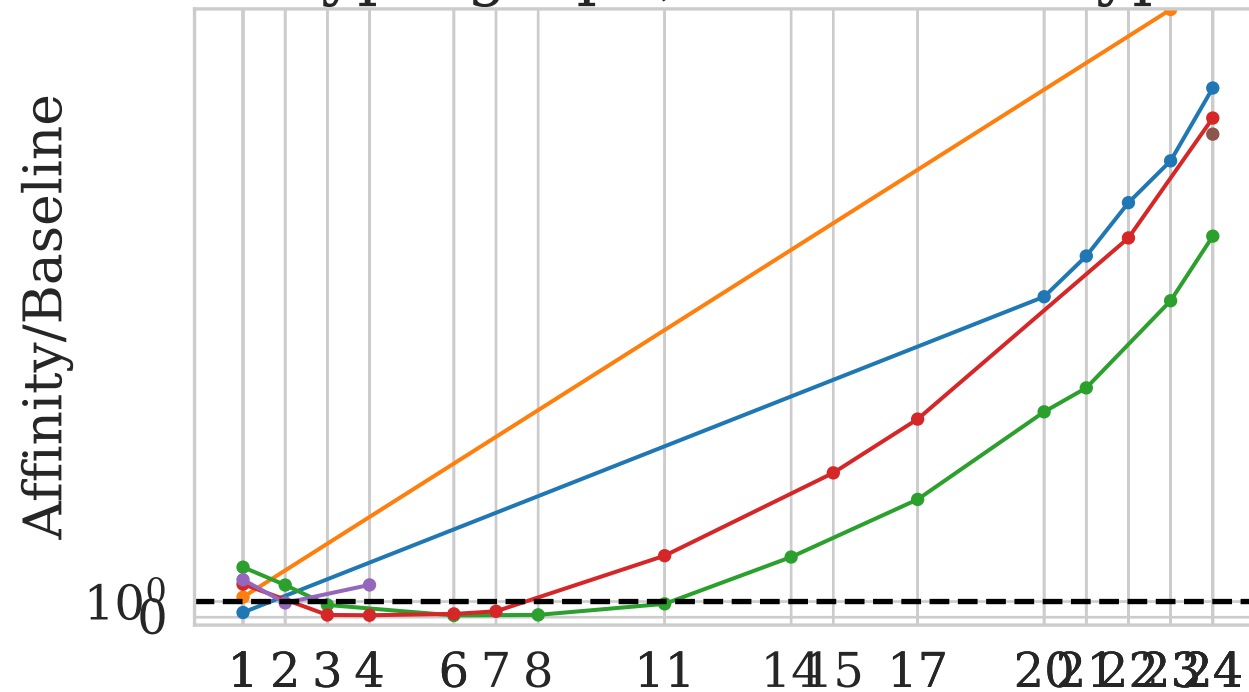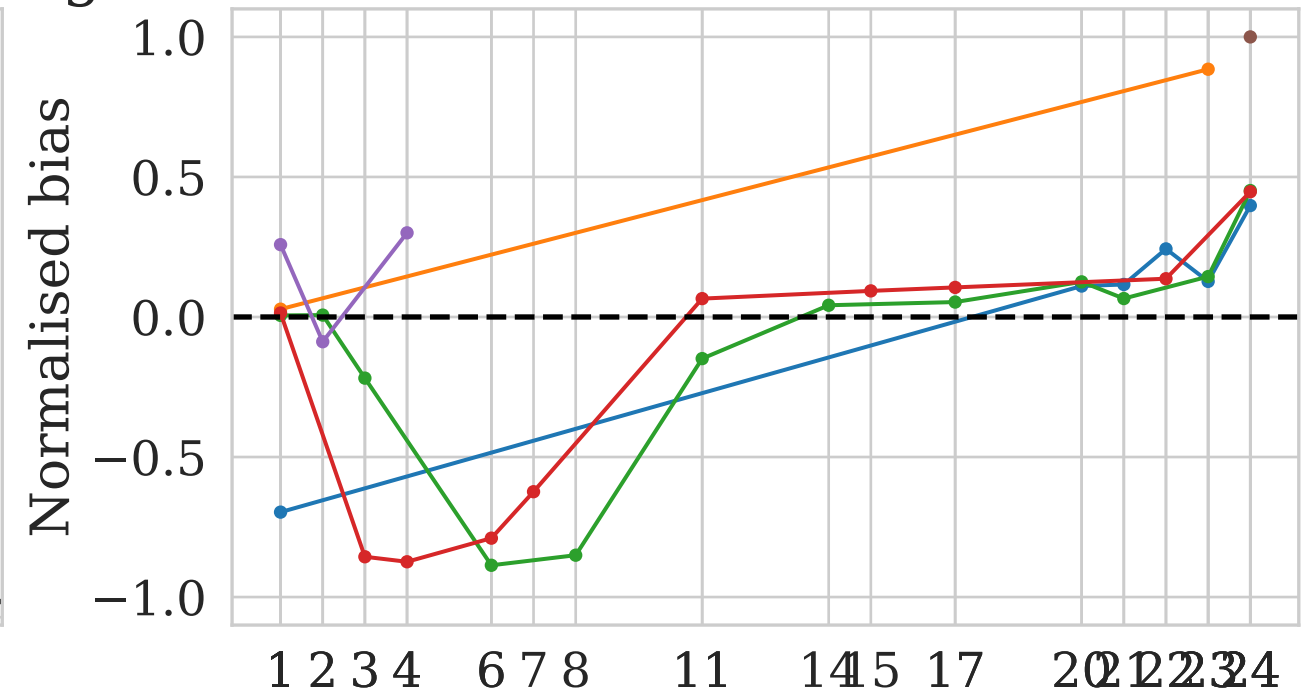

27-uniform hypergraph, number of hyperedges: 25

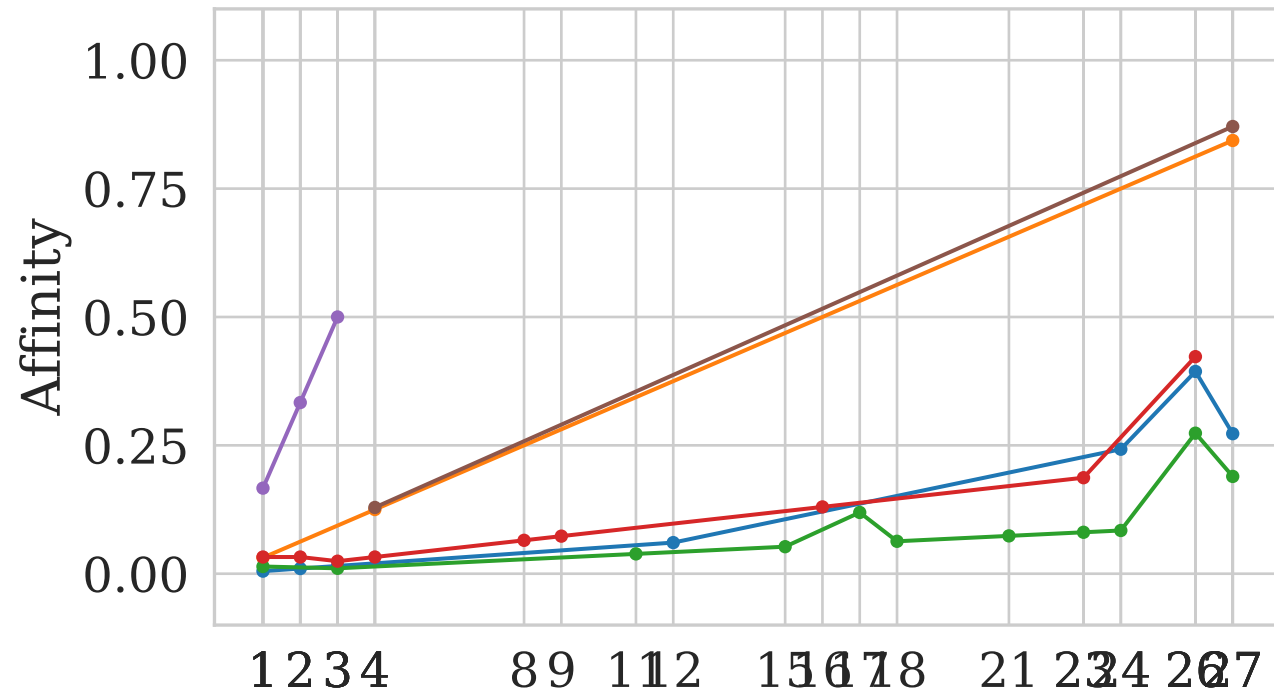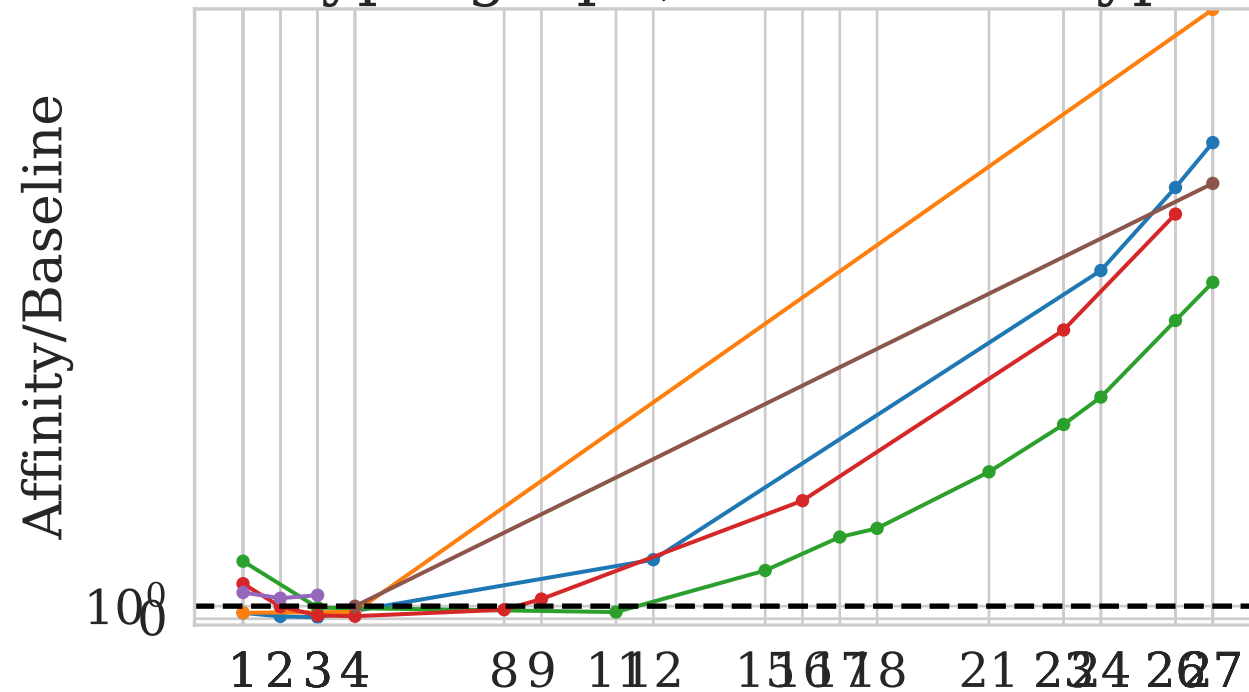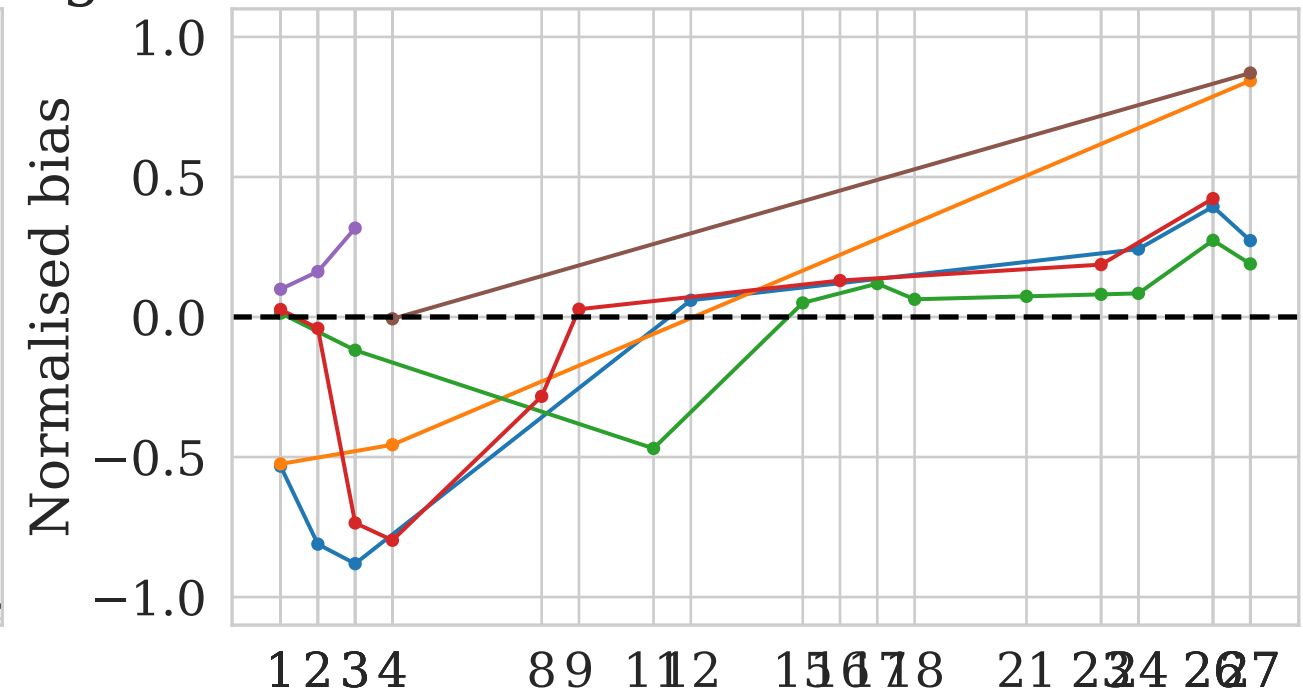

Class 0 Class 1 Class 2 Class 3 Class 4 Class 5



25-uniform hypergraph, number of hyperedges: 19

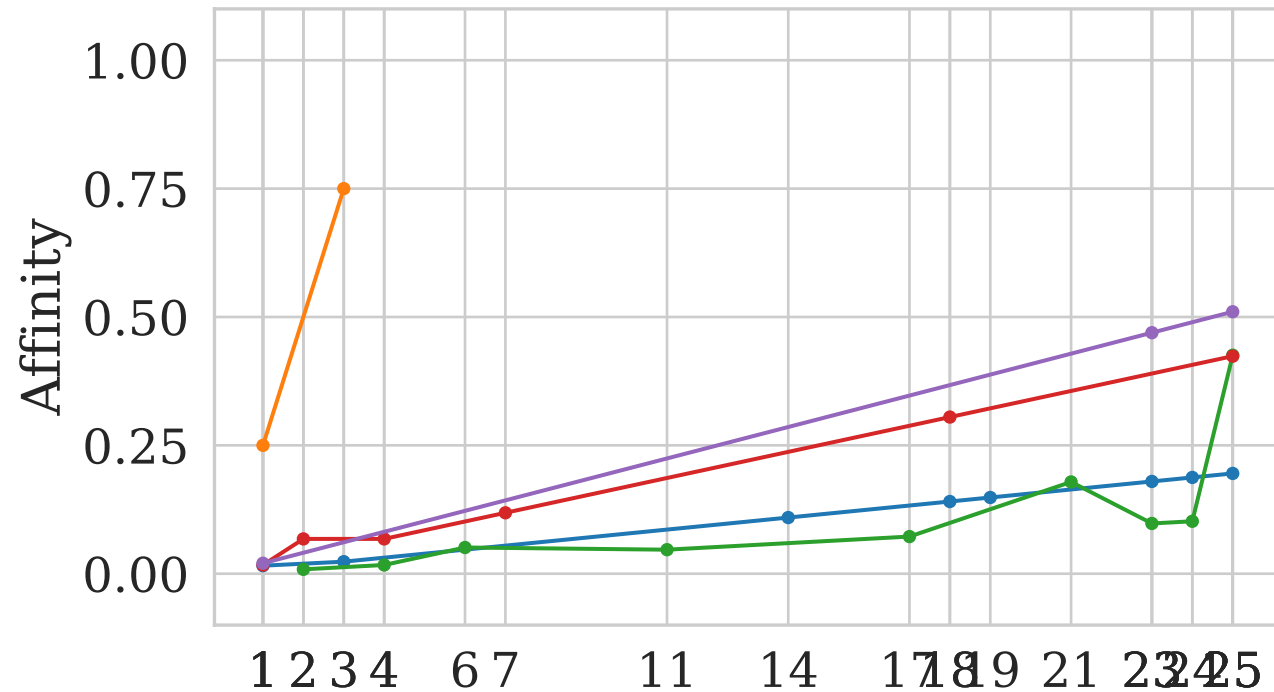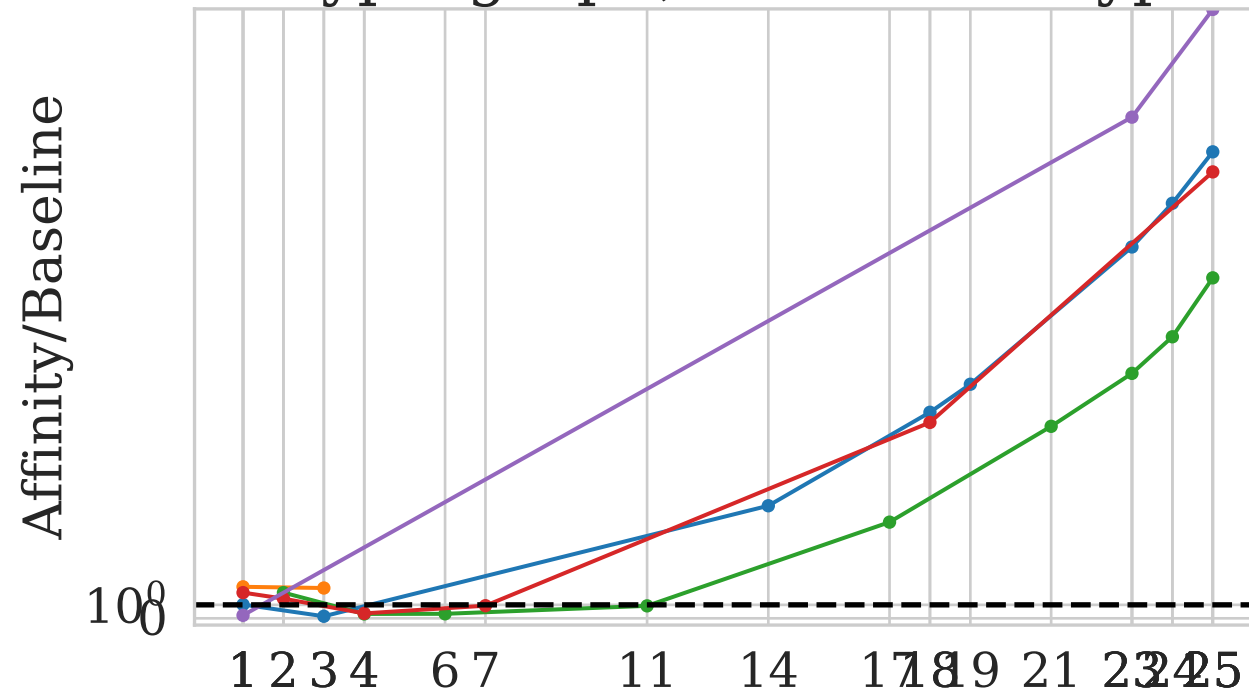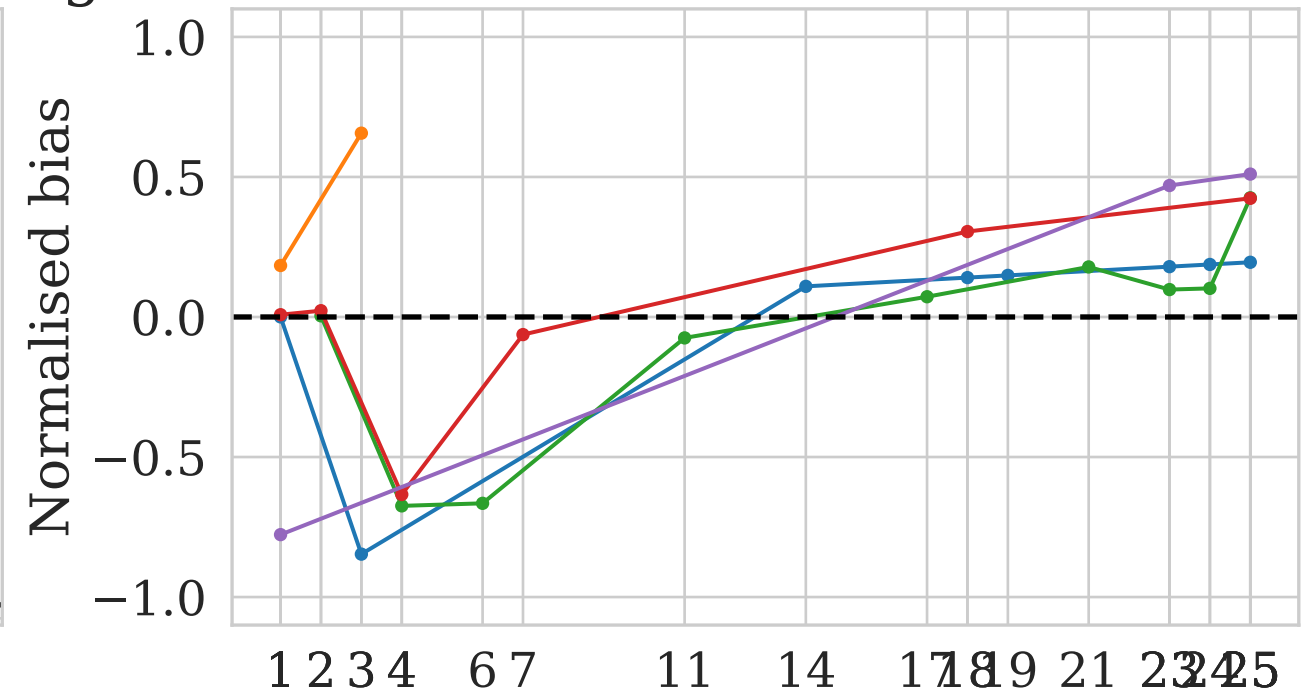

Class 0   Class 1   Class 2   Class 3   Class 4   Class 5

26-uniform hypergraph, number of hyperedges: 18

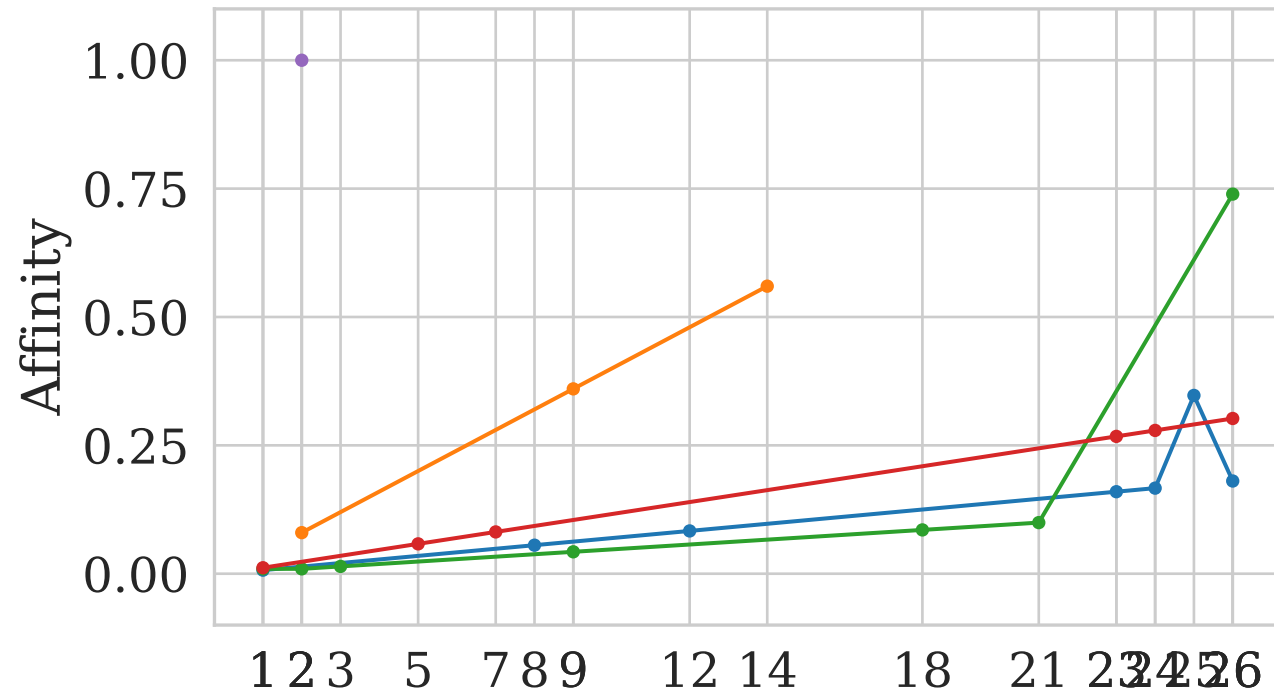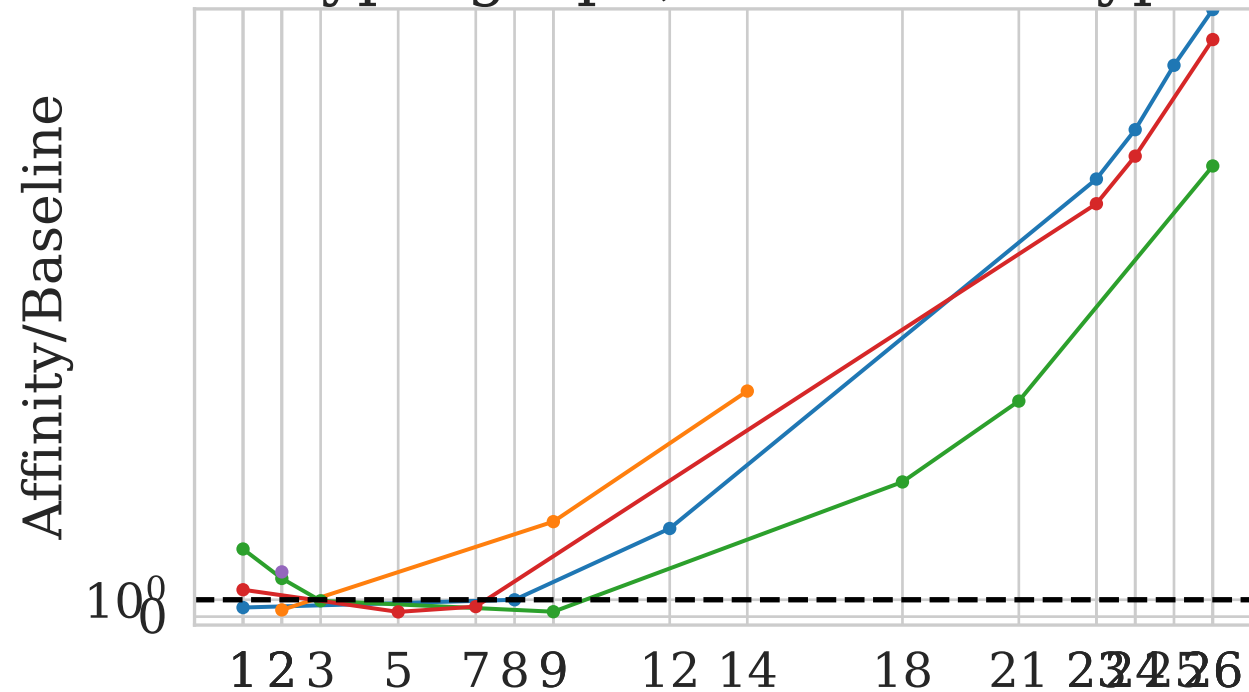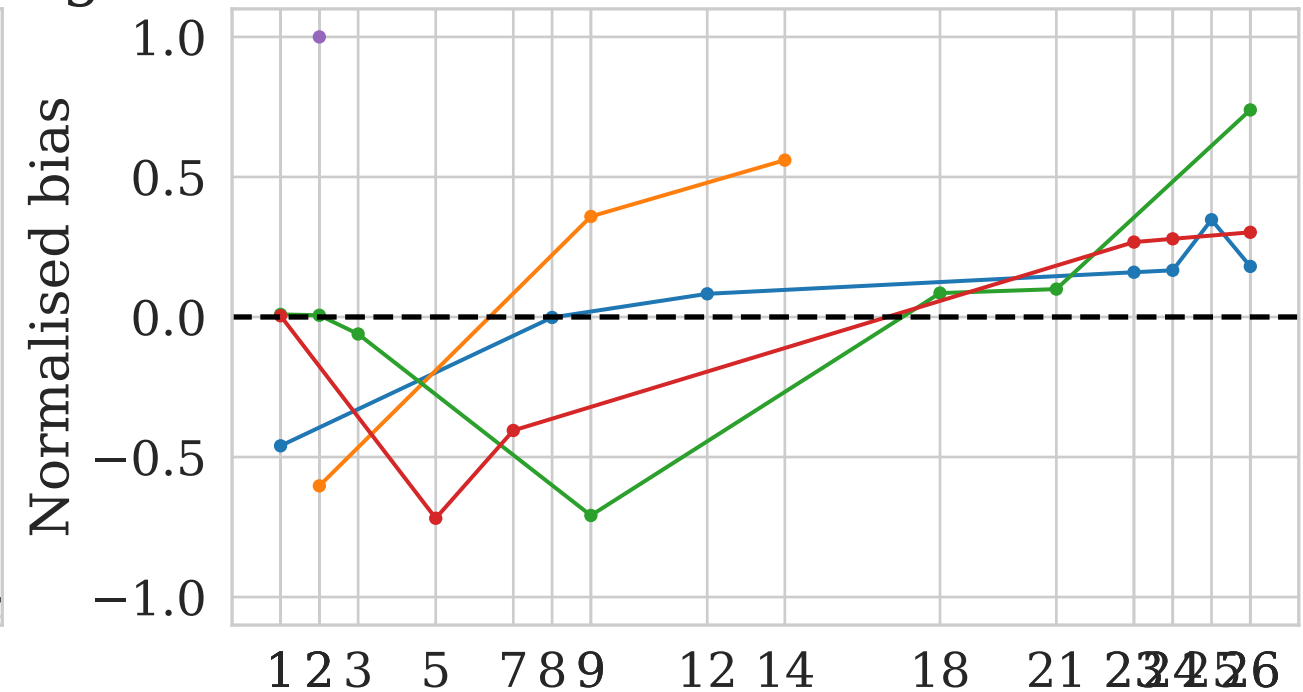

Class 0 Class 1 Class 2 Class 3 Class 4 Class 5

28-uniform hypergraph, number of hyperedges: 18

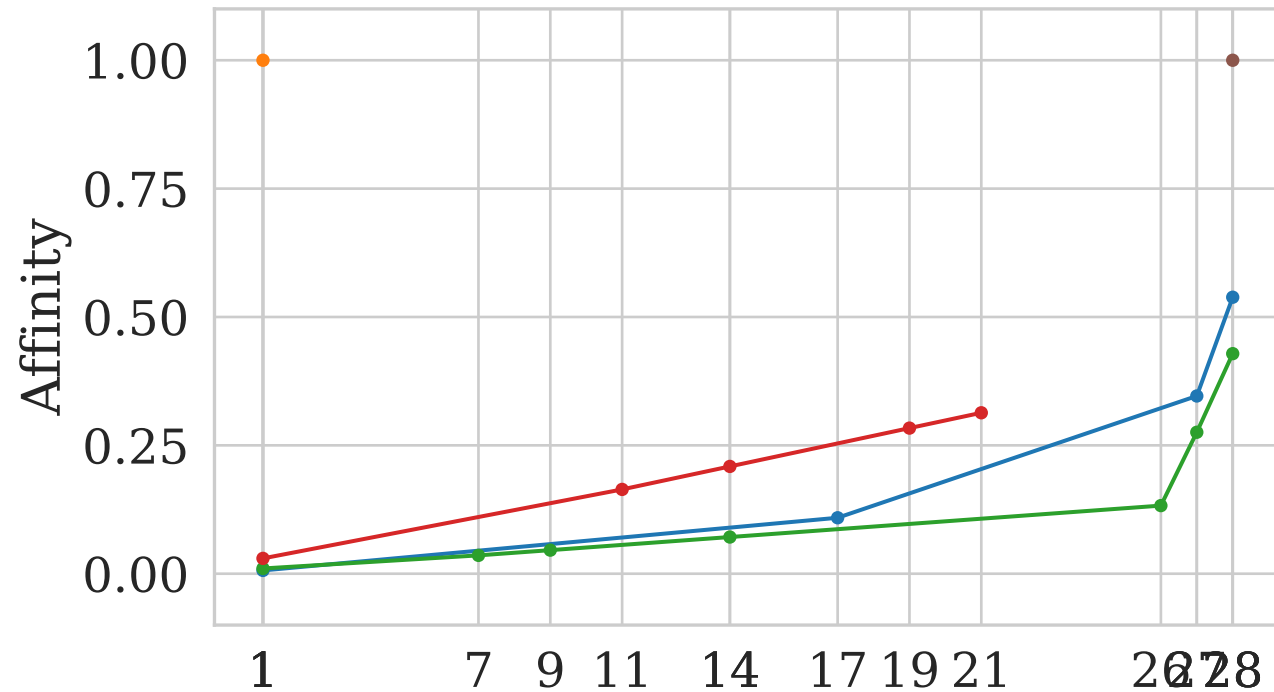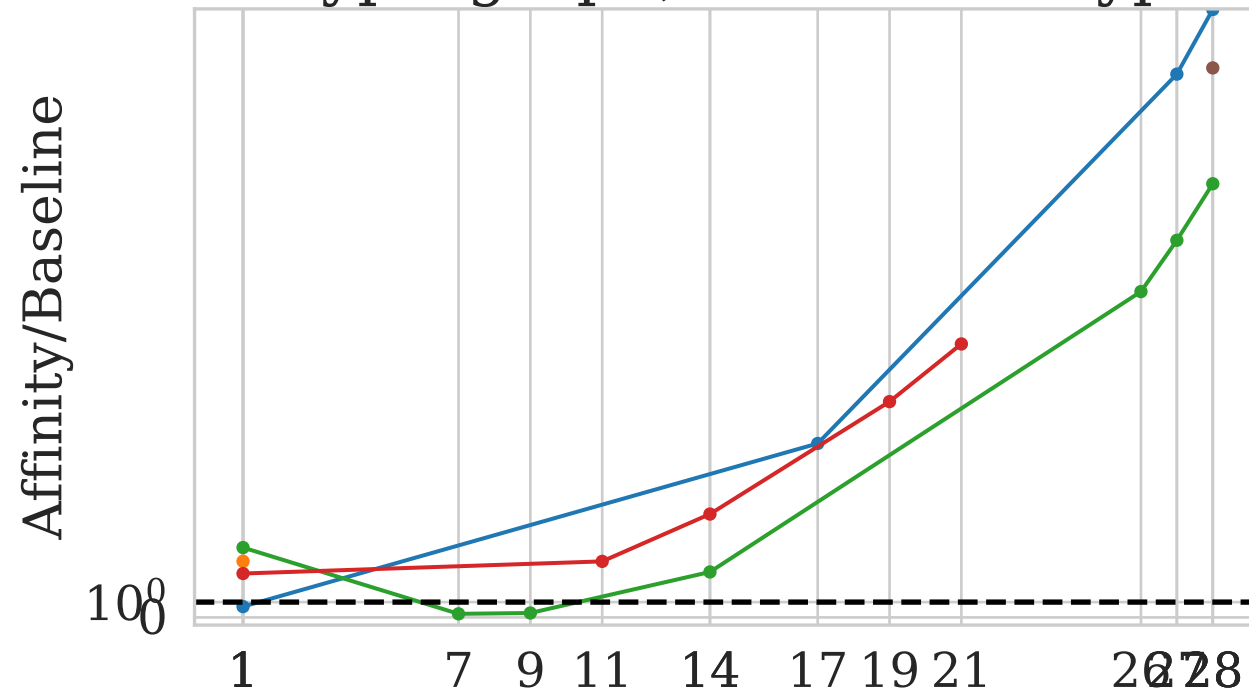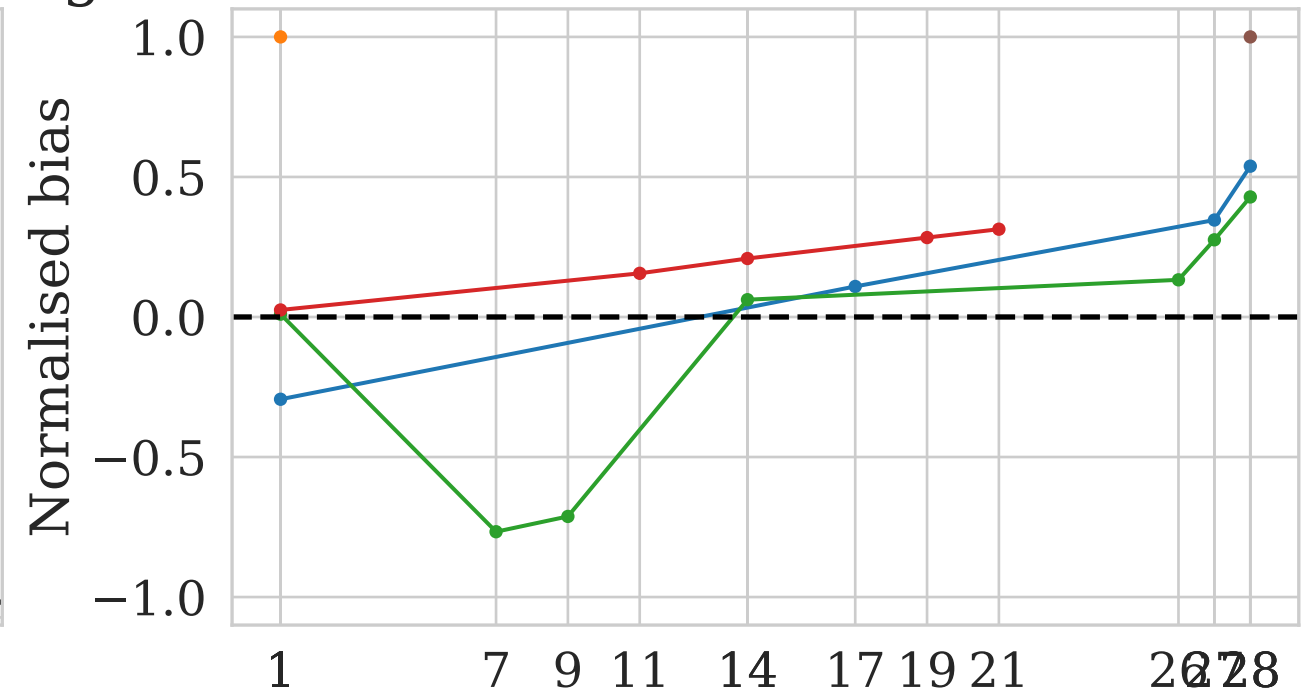

—●— Class 0   
 —●— Class 1   
 —●— Class 2   
 —●— Class 3   
 —●— Class 4   
 —●— Class 5

32-uniform hypergraph, number of hyperedges: 16

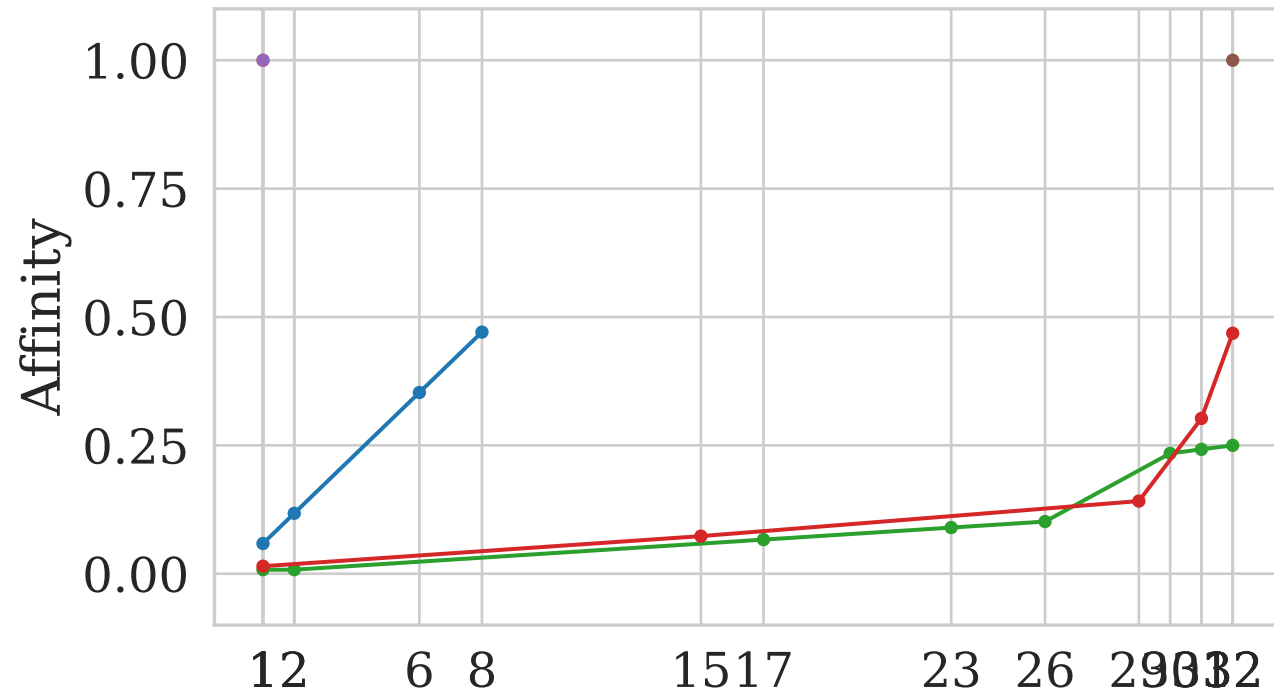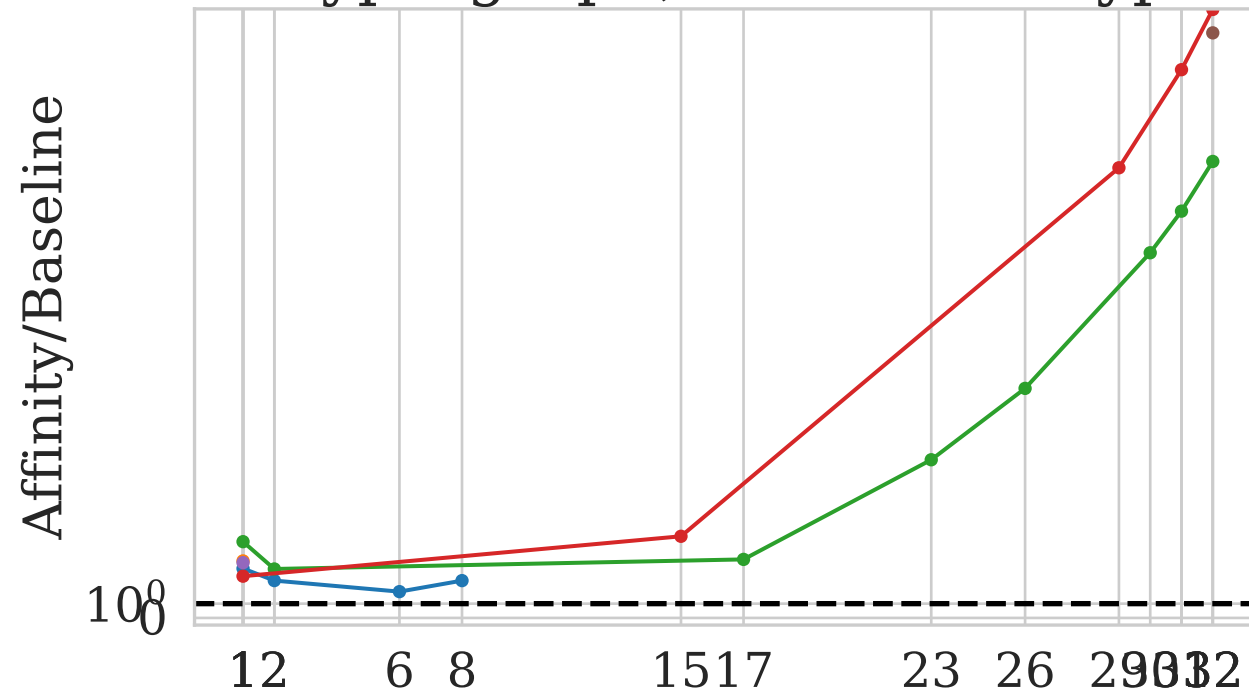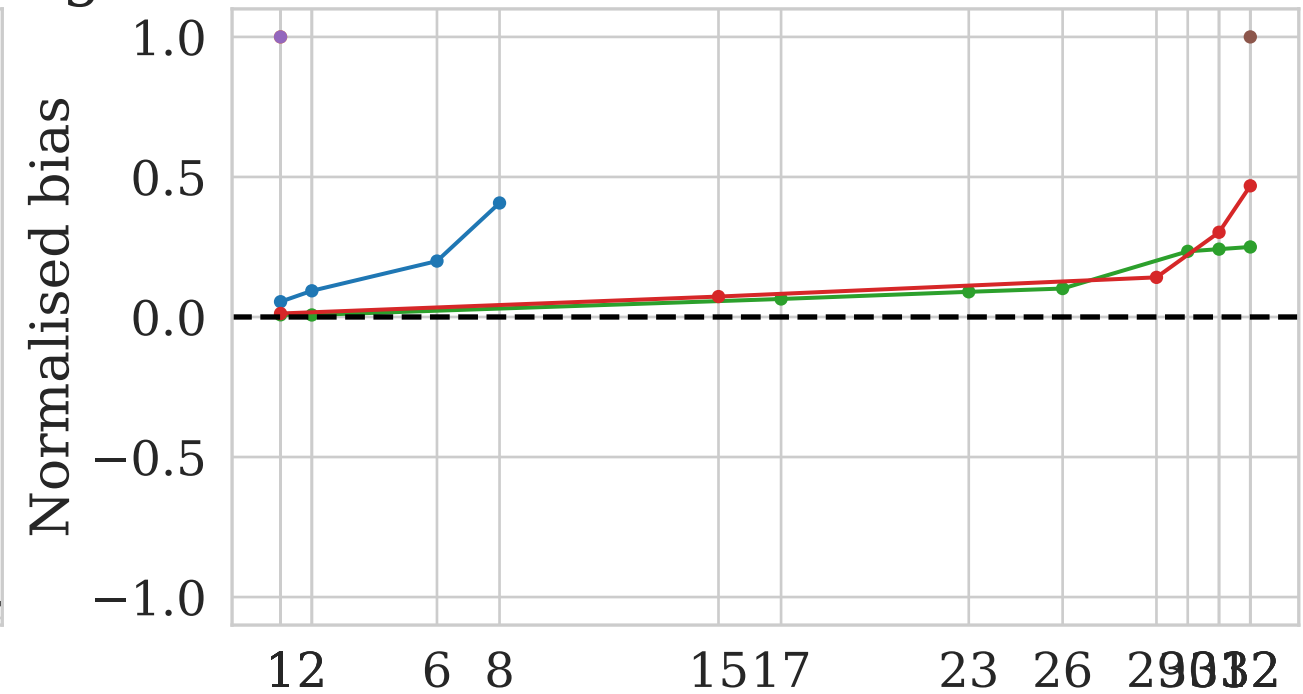

Class 0 Class 1 Class 2 Class 3 Class 4 Class 5

30-uniform hypergraph, number of hyperedges: 14

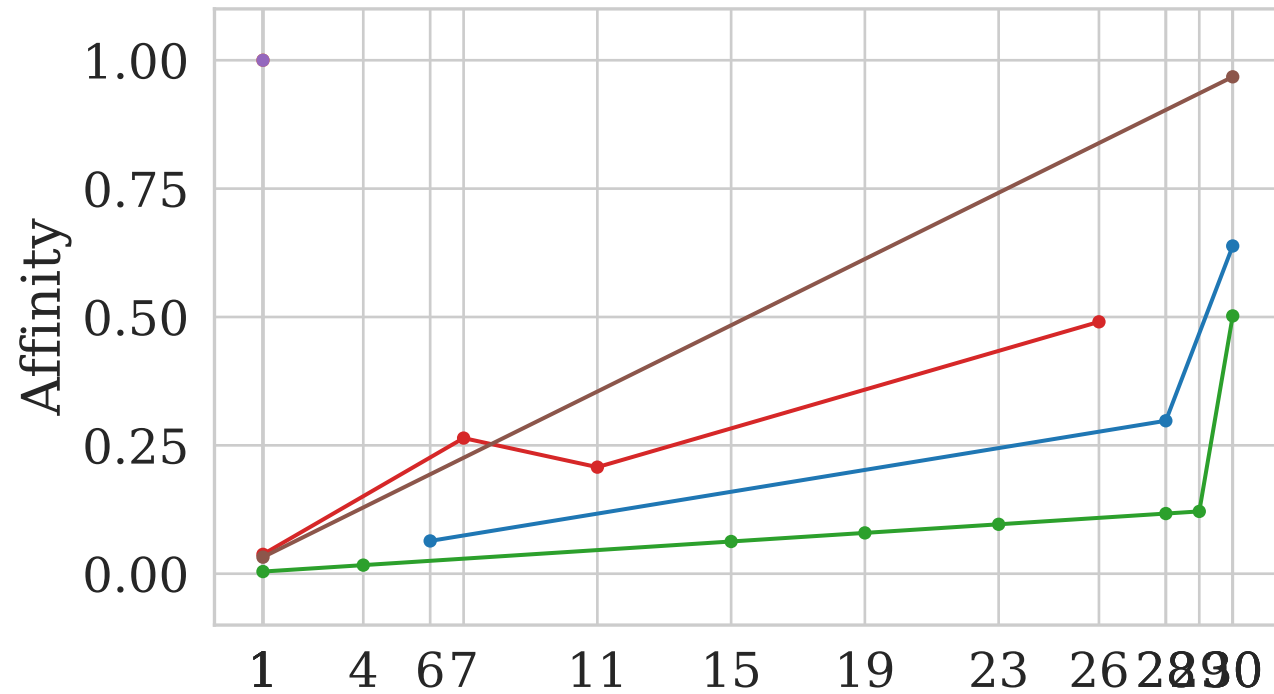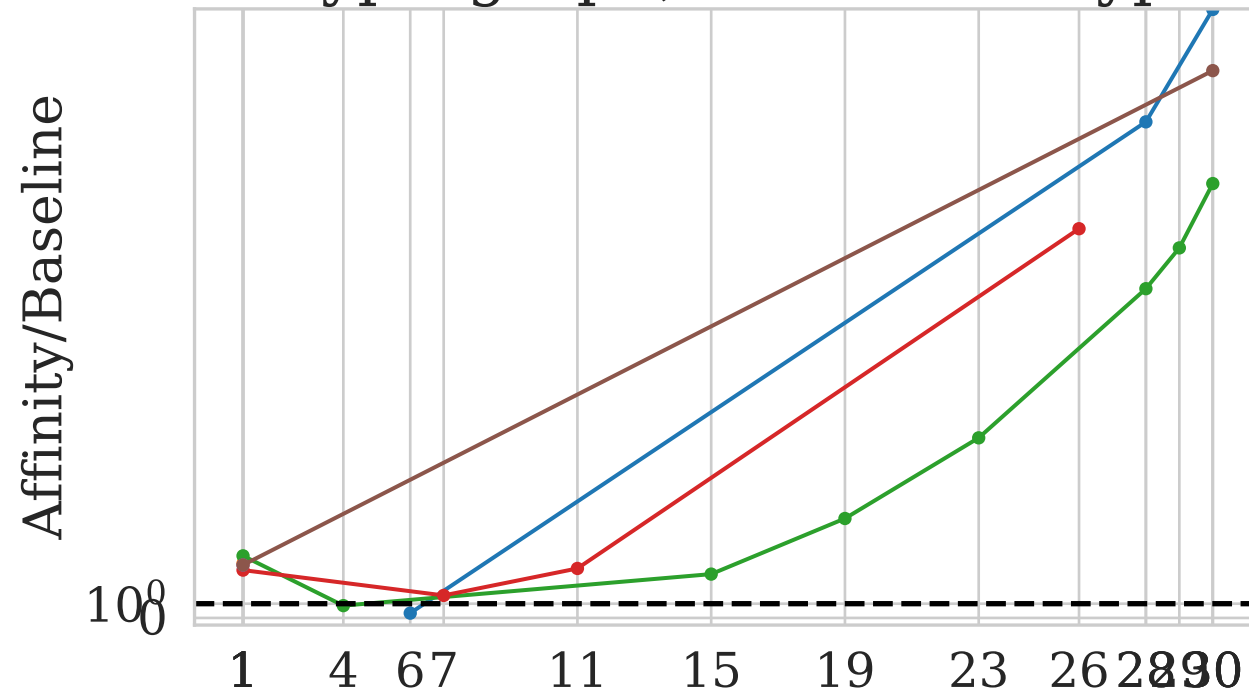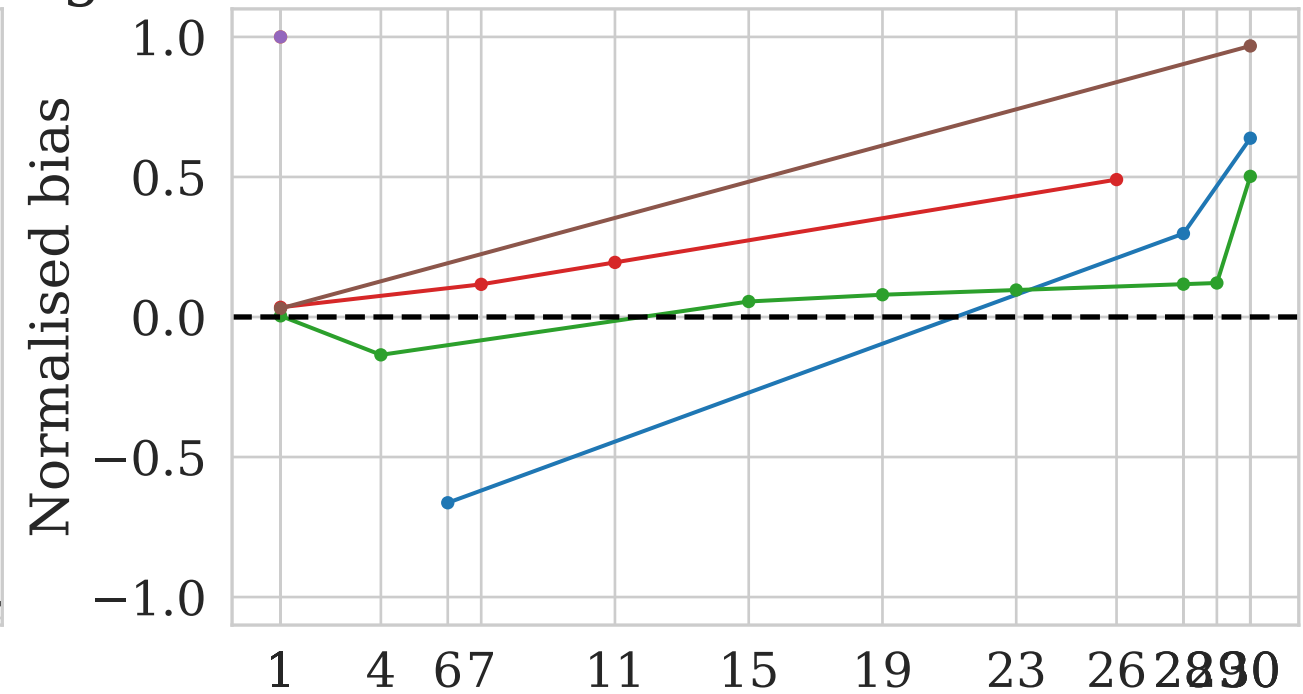

Class 0 Class 1 Class 2 Class 3 Class 4 Class 5

29-uniform hypergraph, number of hyperedges: 13

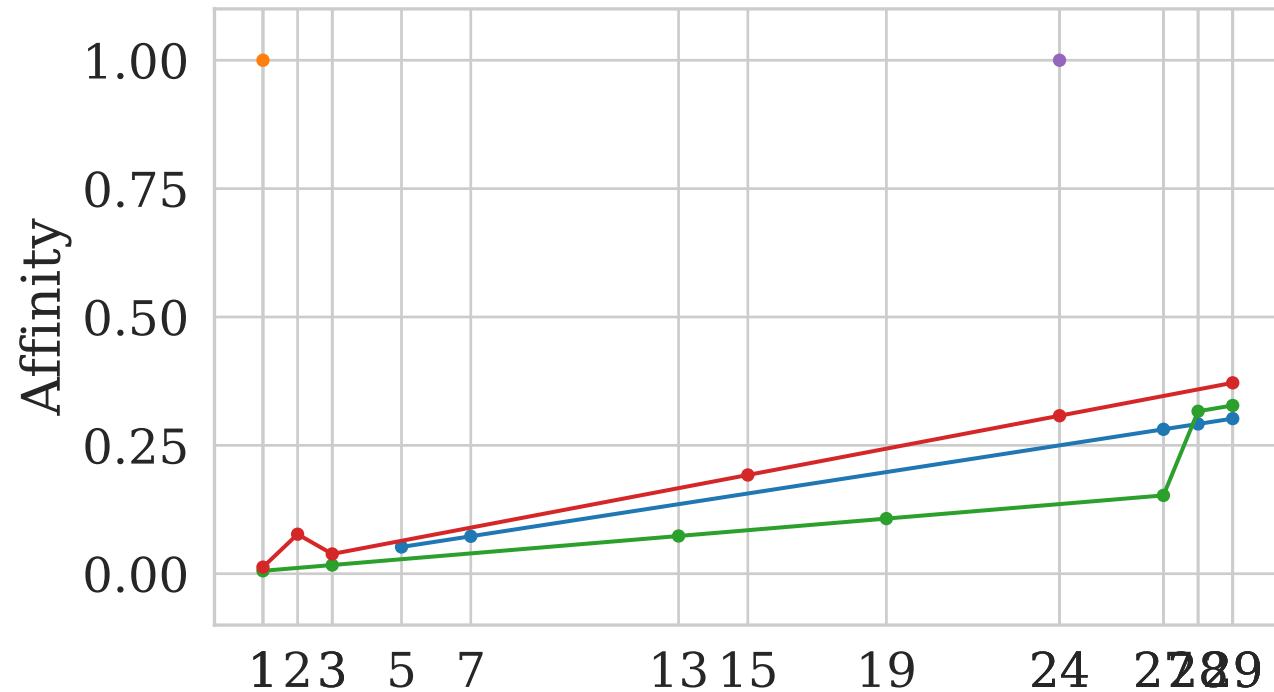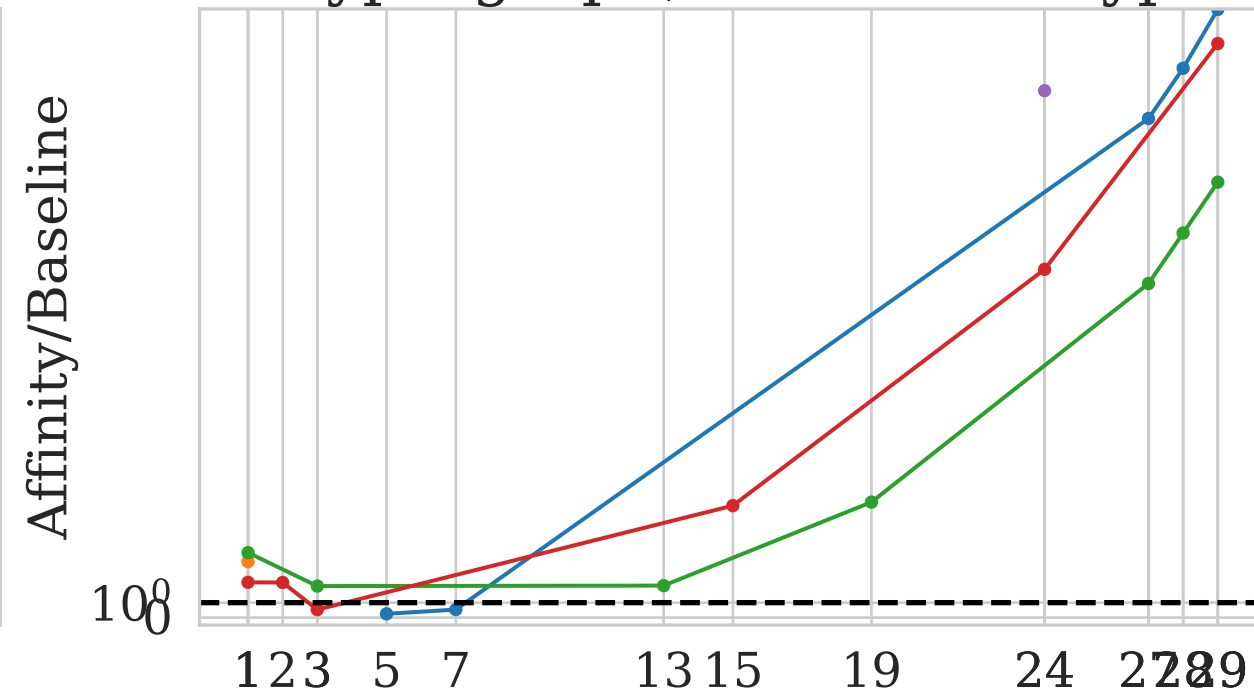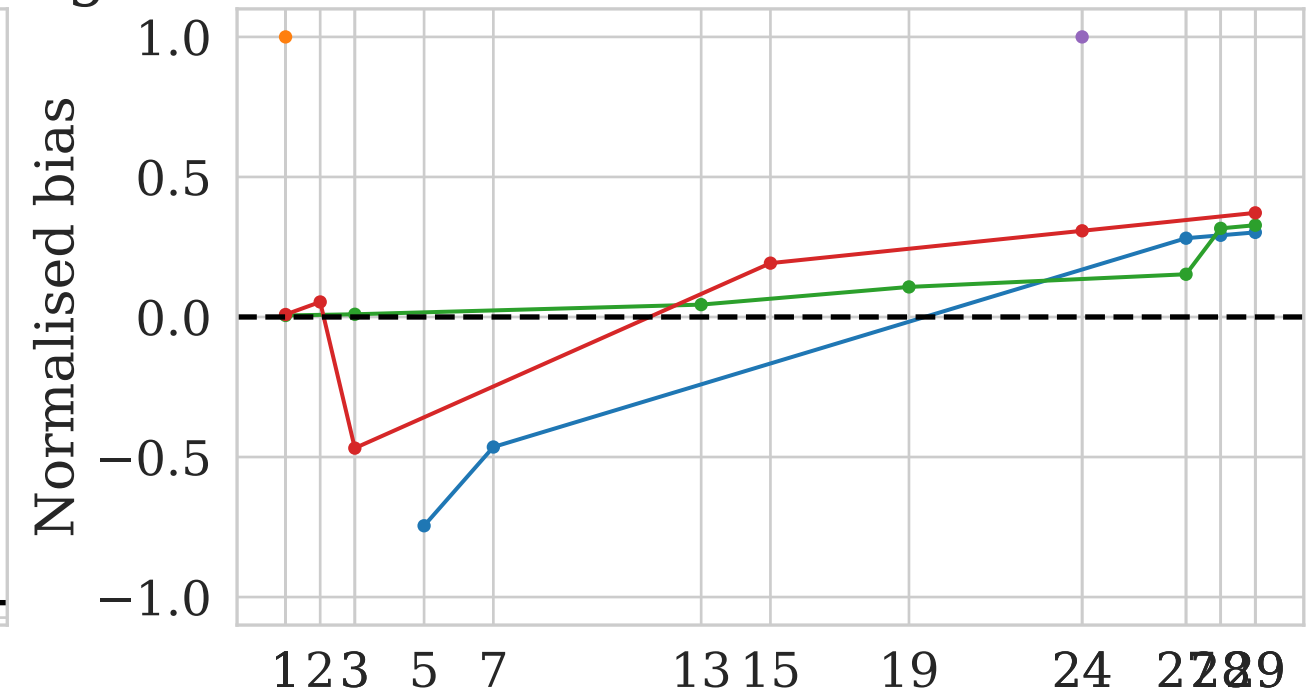

Class 0 Class 1 Class 2 Class 3 Class 4 Class 5

31-uniform hypergraph, number of hyperedges: 13

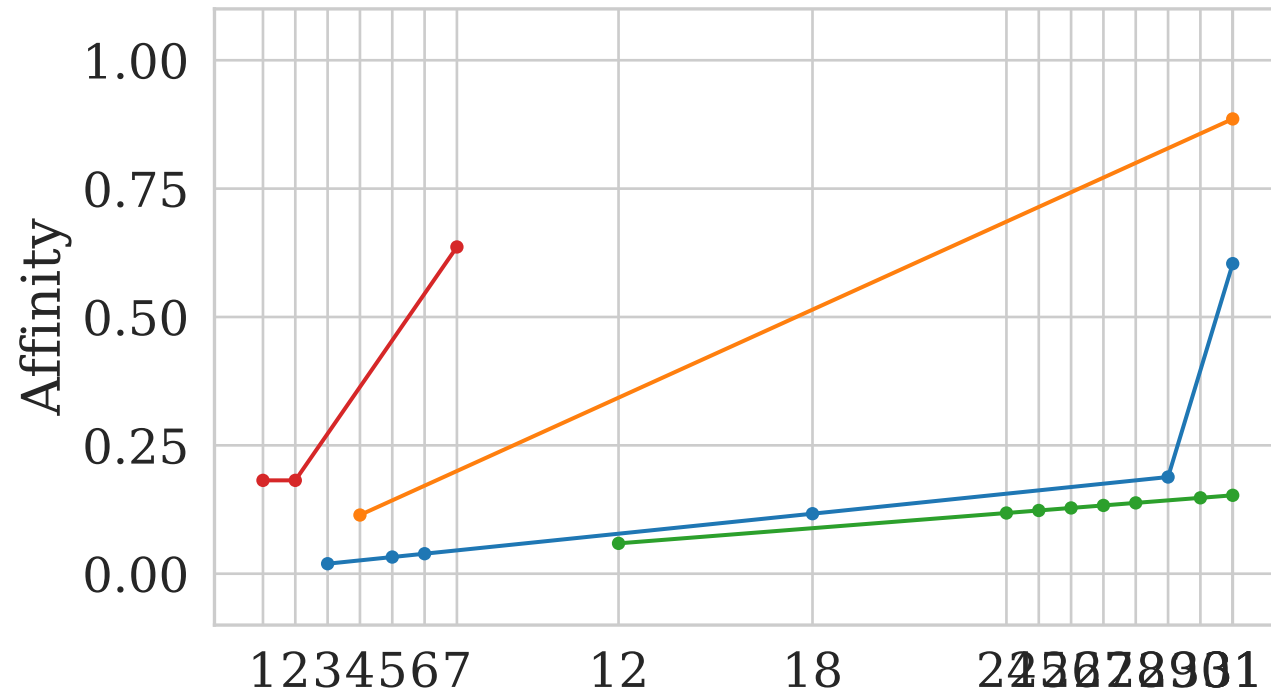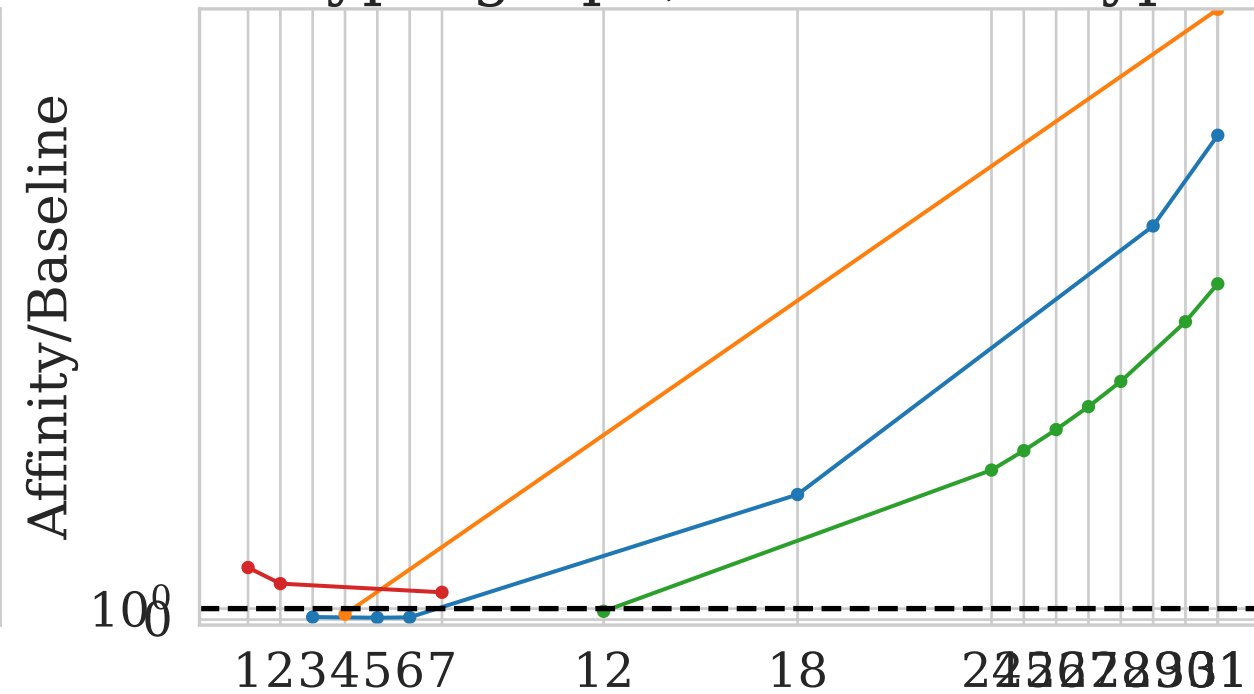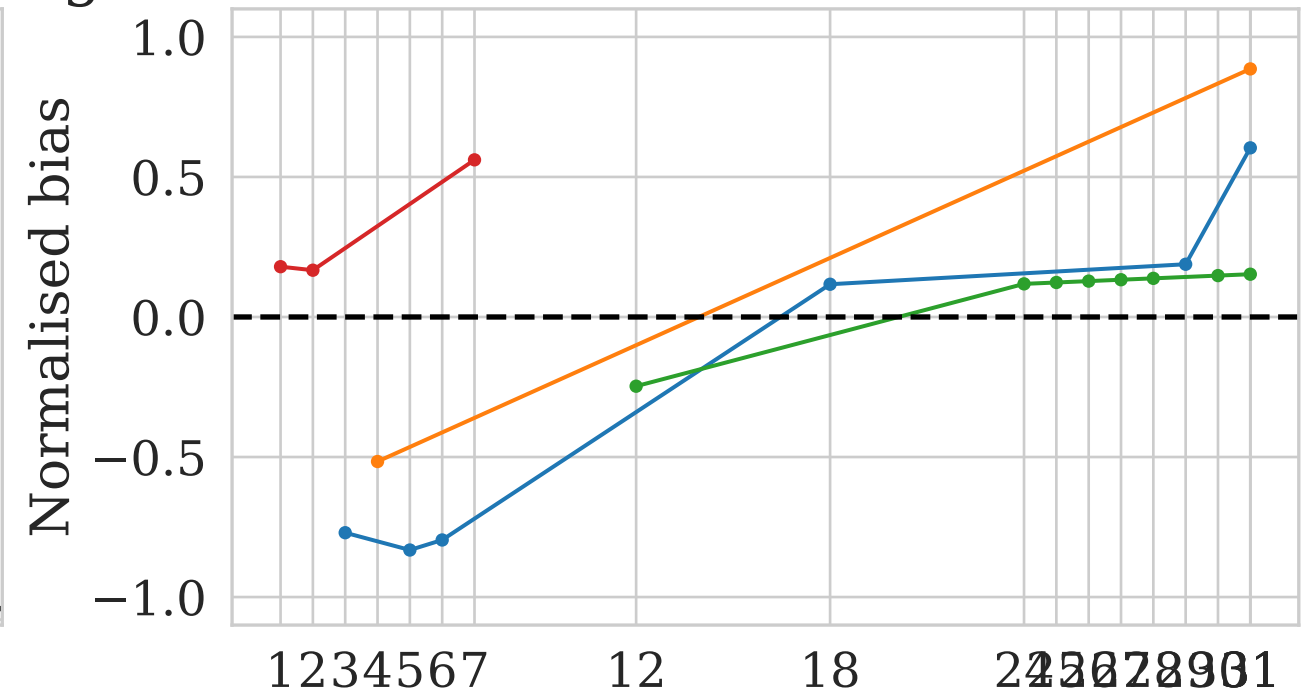

Class 0 Class 1 Class 2 Class 3 Class 4 Class 5

34-uniform hypergraph, number of hyperedges: 11

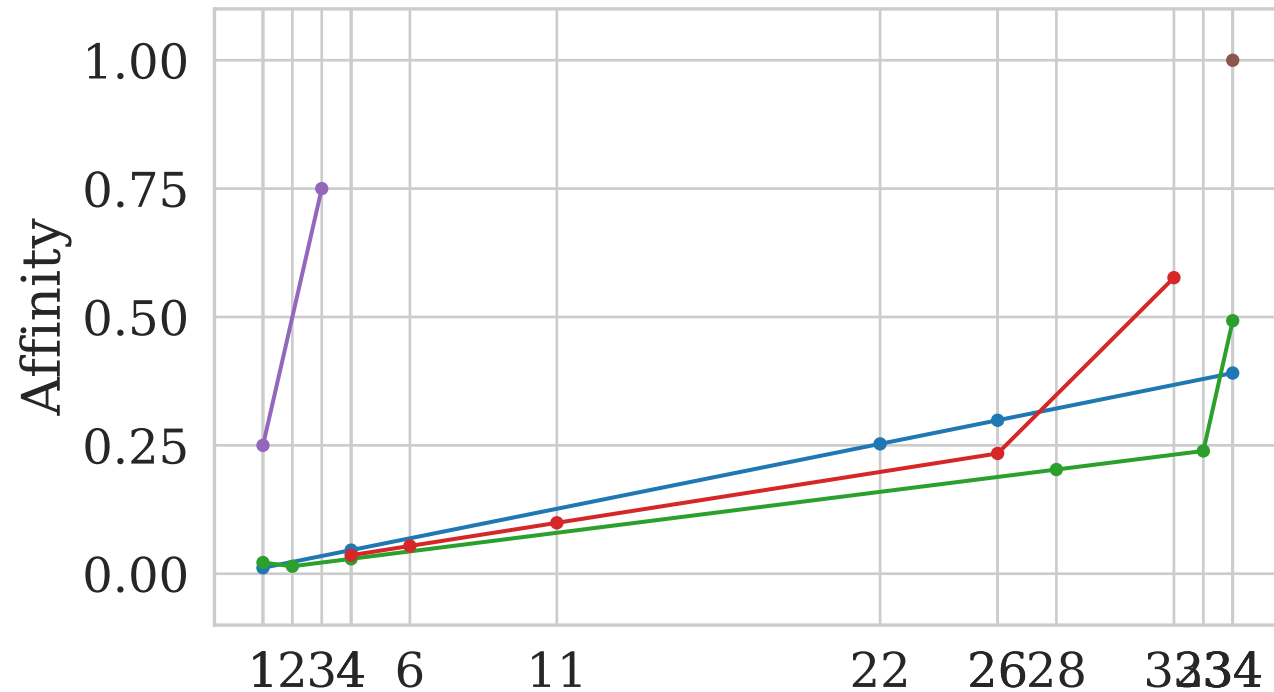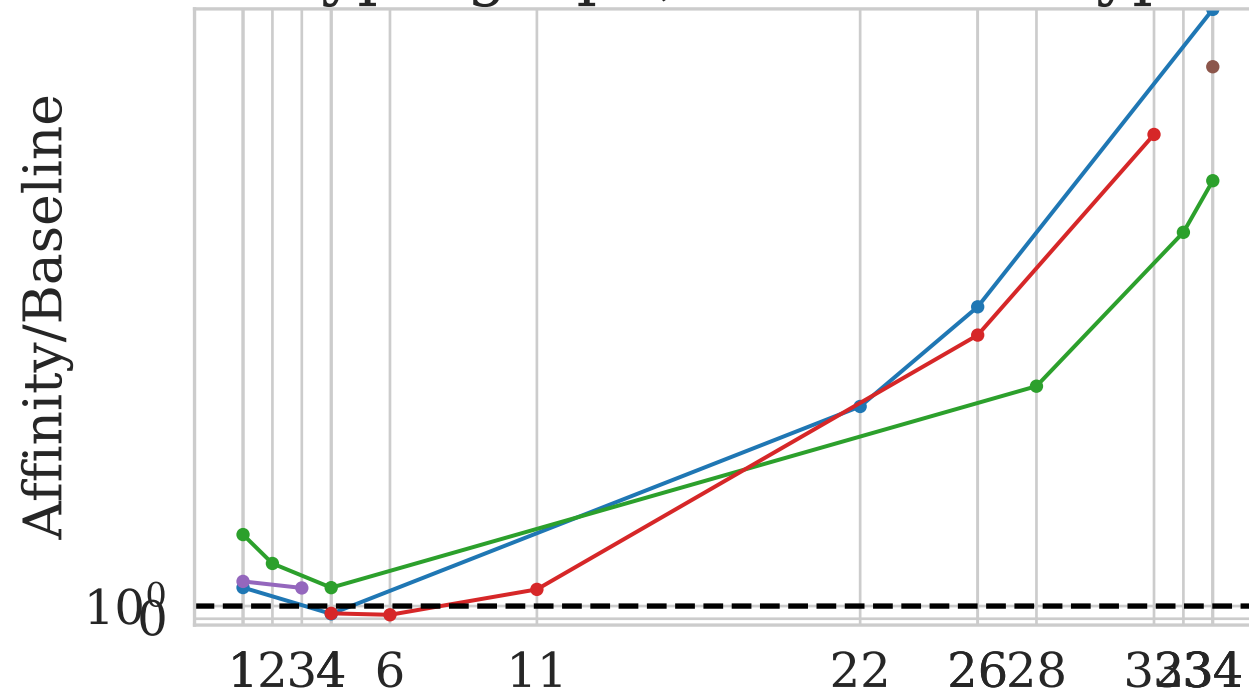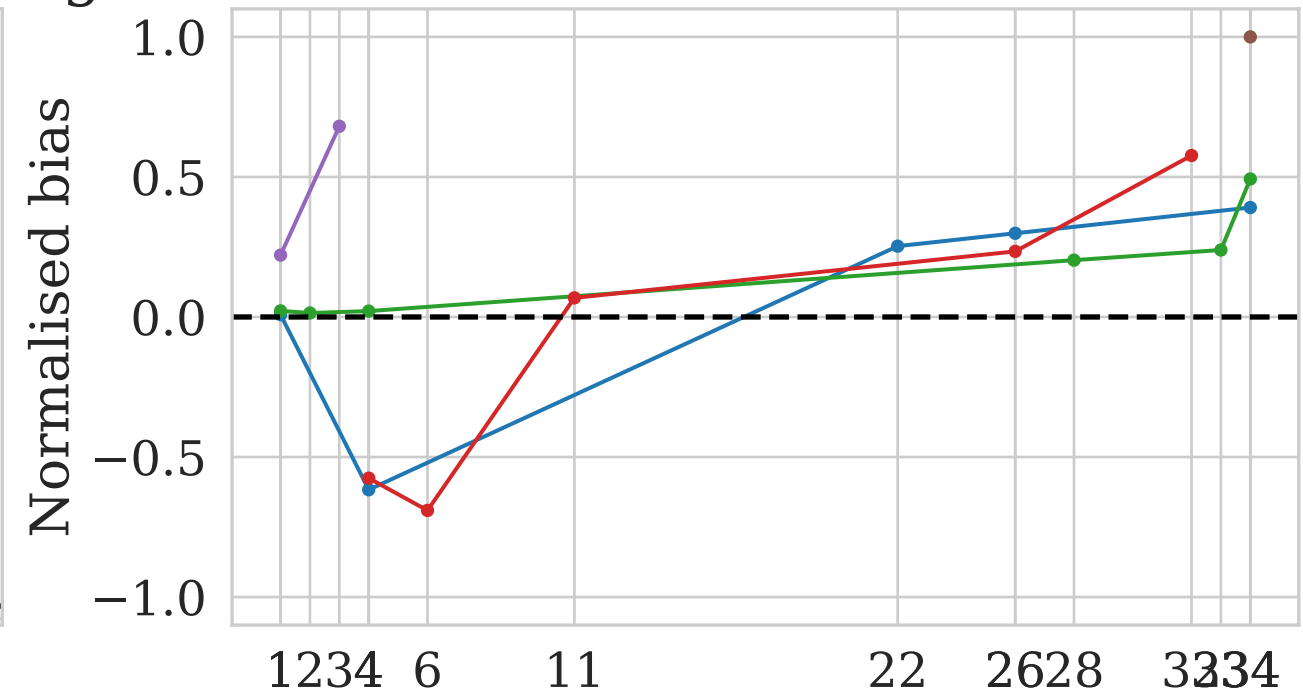

Class 0 Class 1 Class 2 Class 3 Class 4 Class 5



37-uniform hypergraph, number of hyperedges: 11

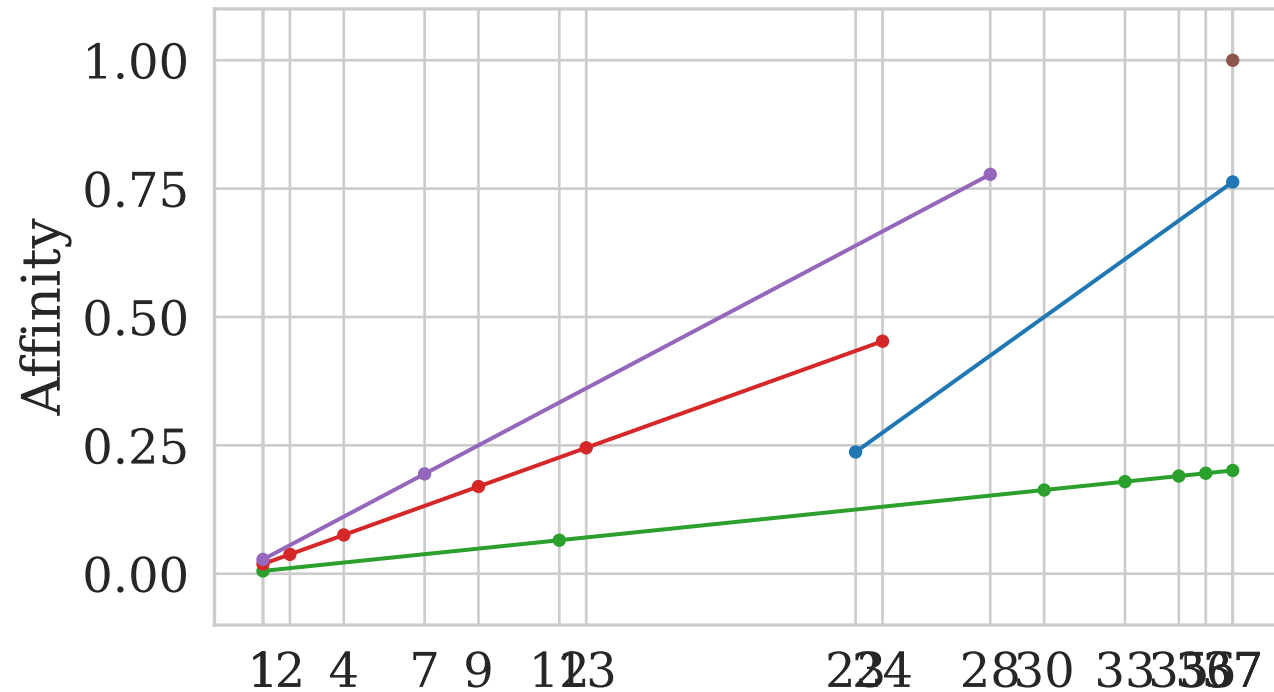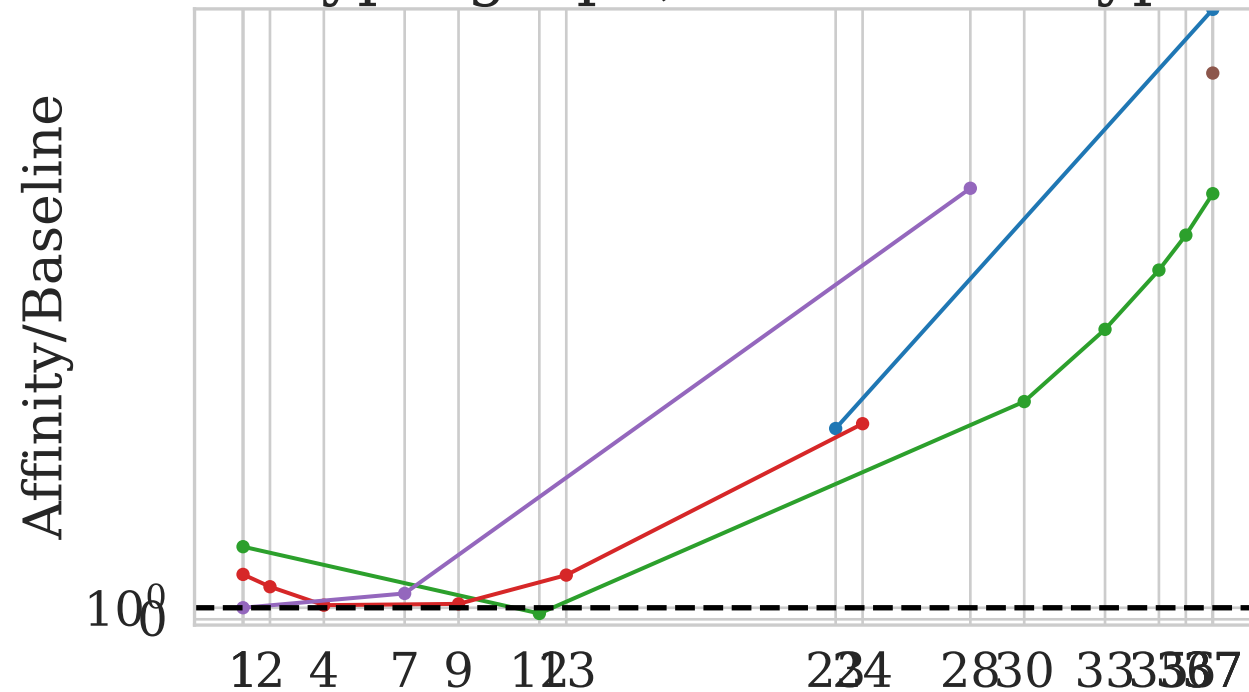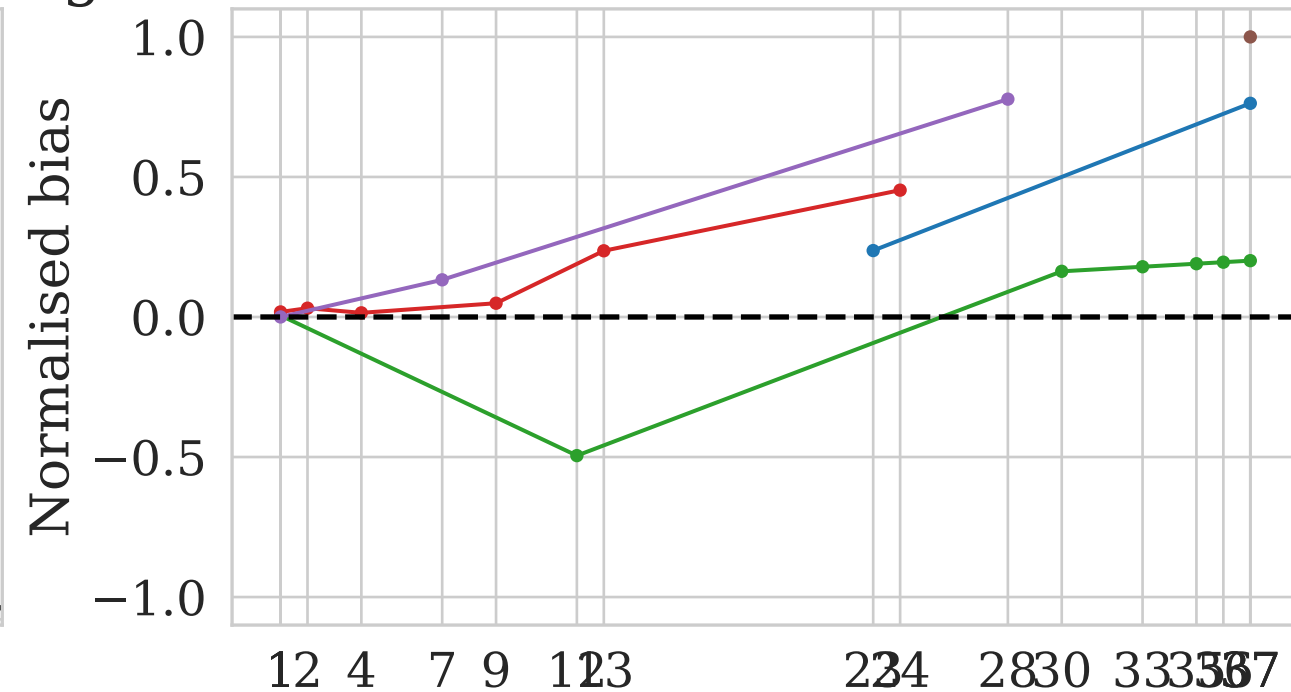

Class 0 Class 1 Class 2 Class 3 Class 4 Class 5

35-uniform hypergraph, number of hyperedges: 8

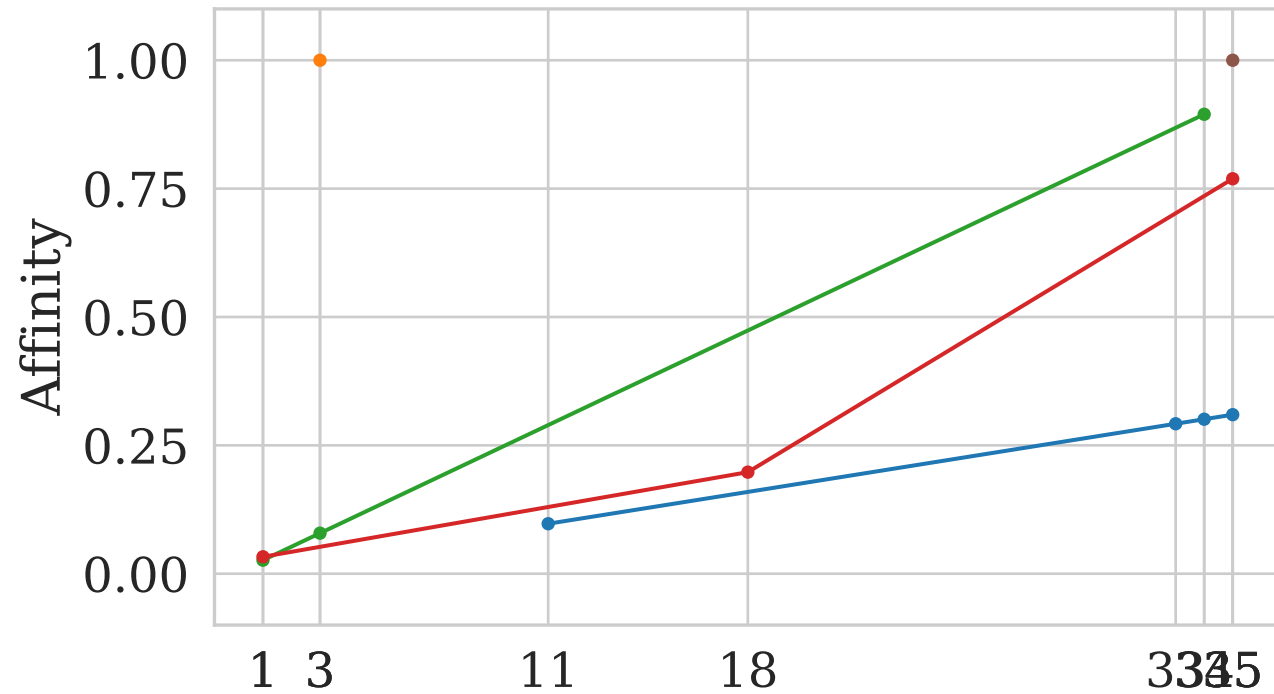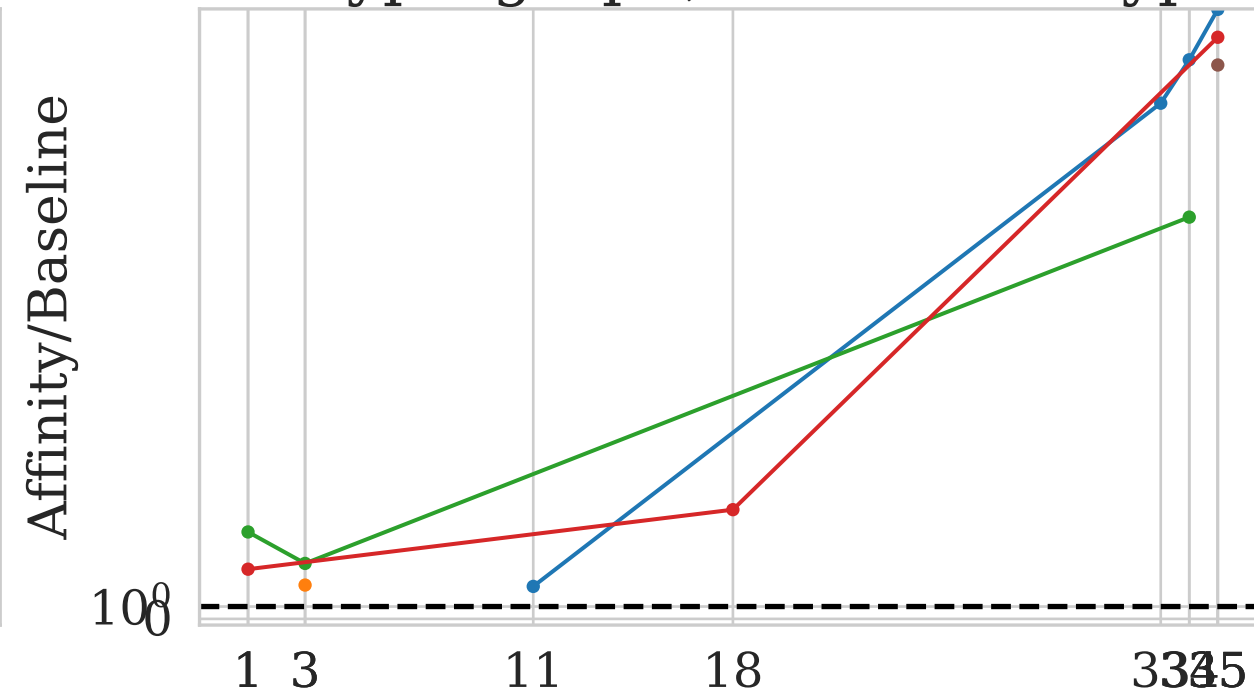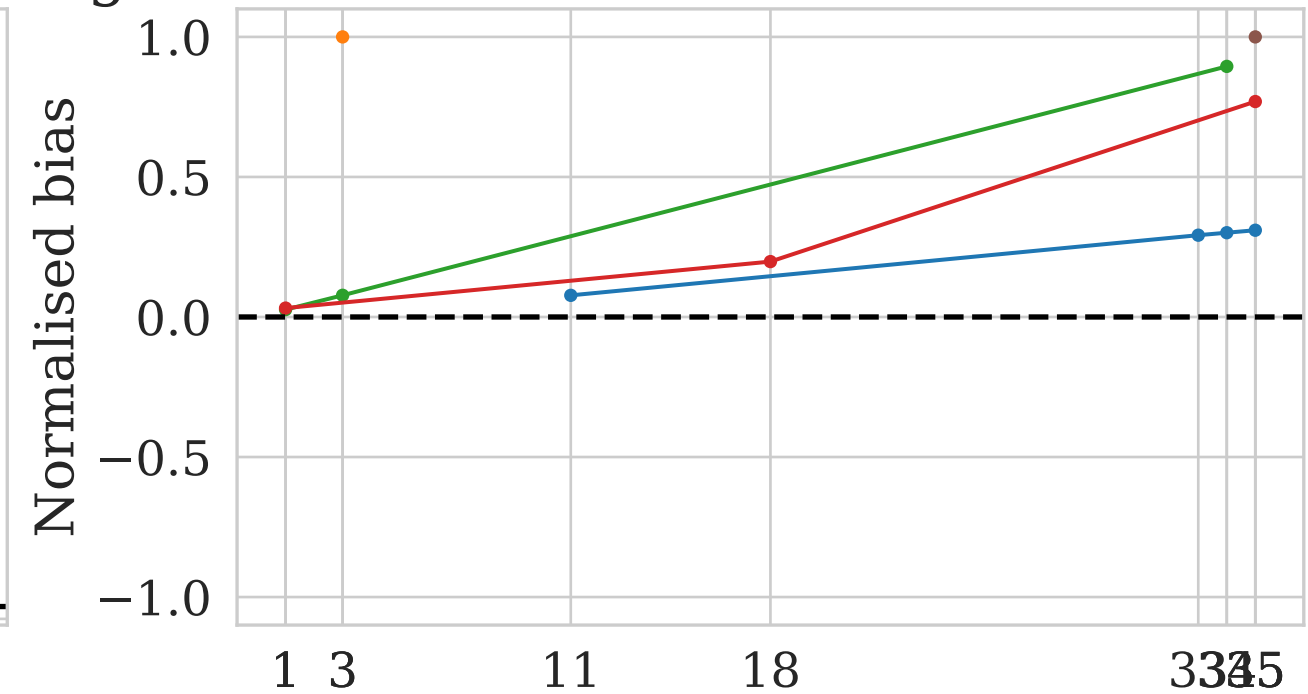

Class 0 Class 1 Class 2 Class 3 Class 4 Class 5

33-uniform hypergraph, number of hyperedges: 8

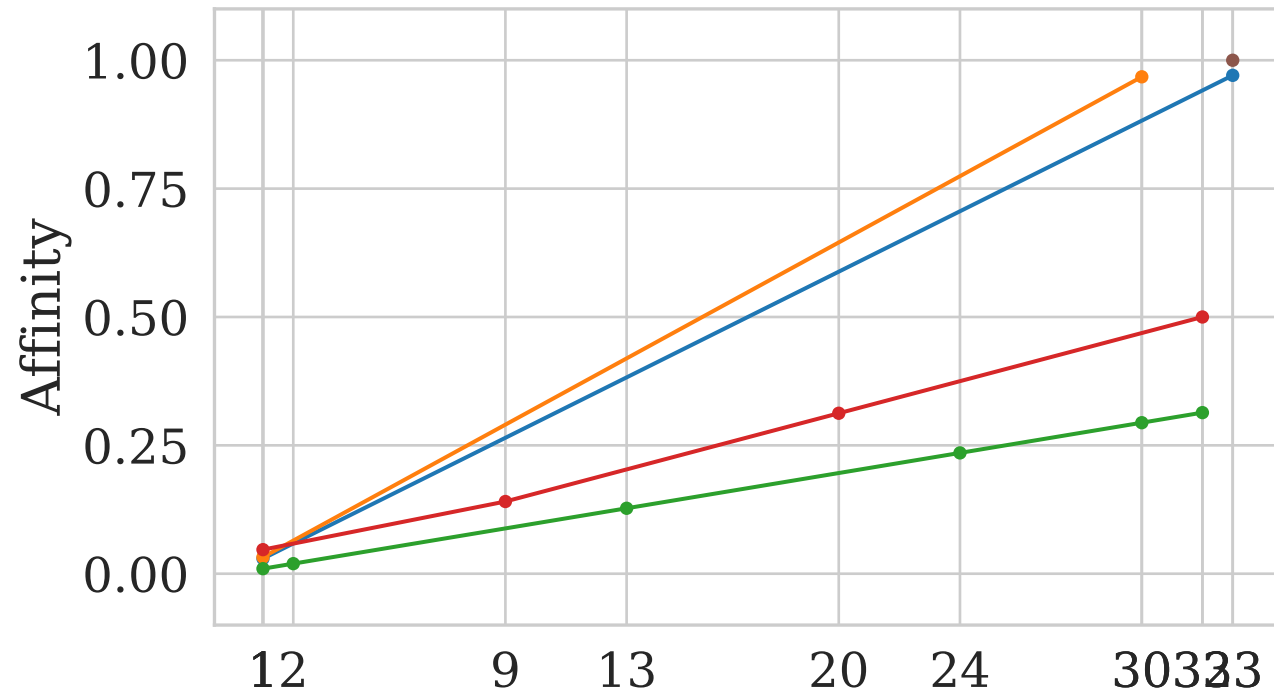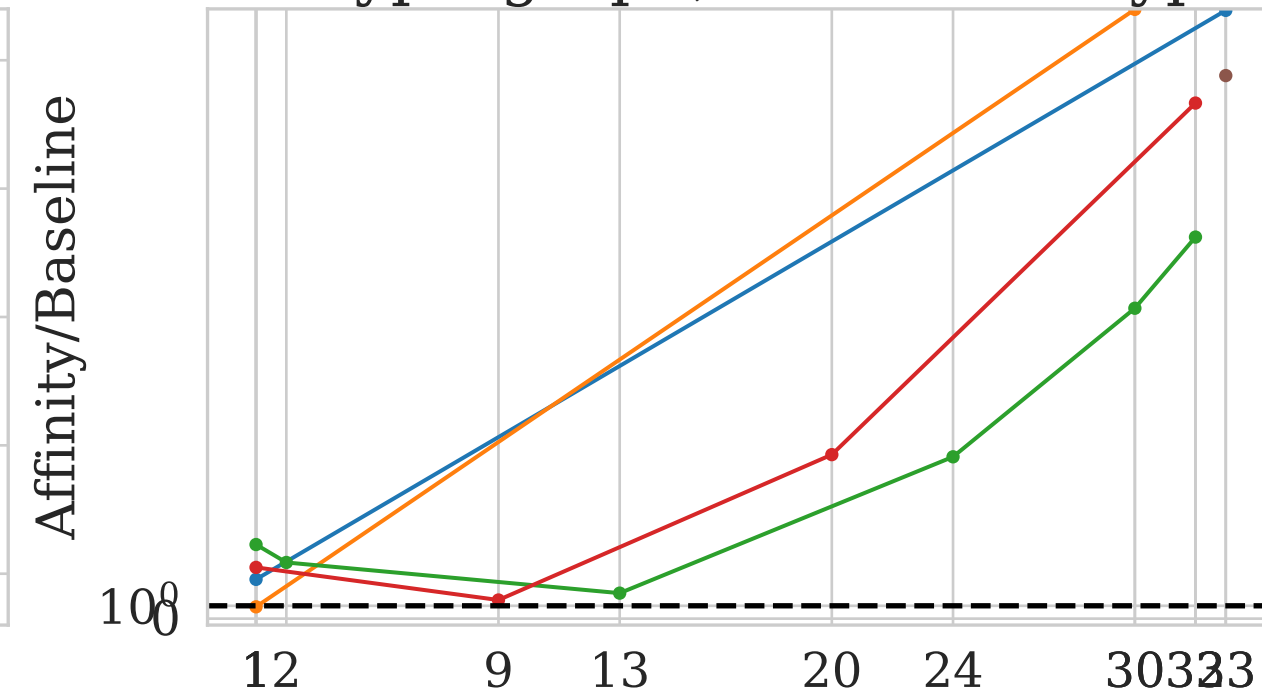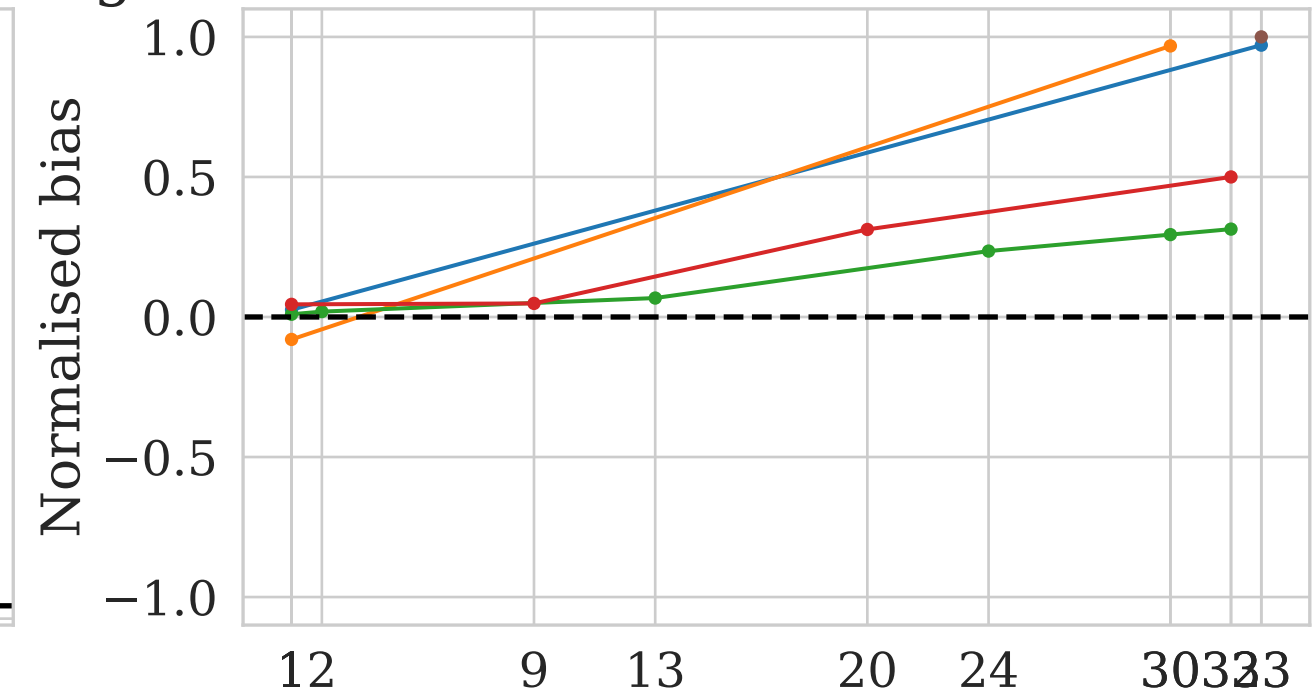

Class 0 Class 1 Class 2 Class 3 Class 4 Class 5

41-uniform hypergraph, number of hyperedges: 8

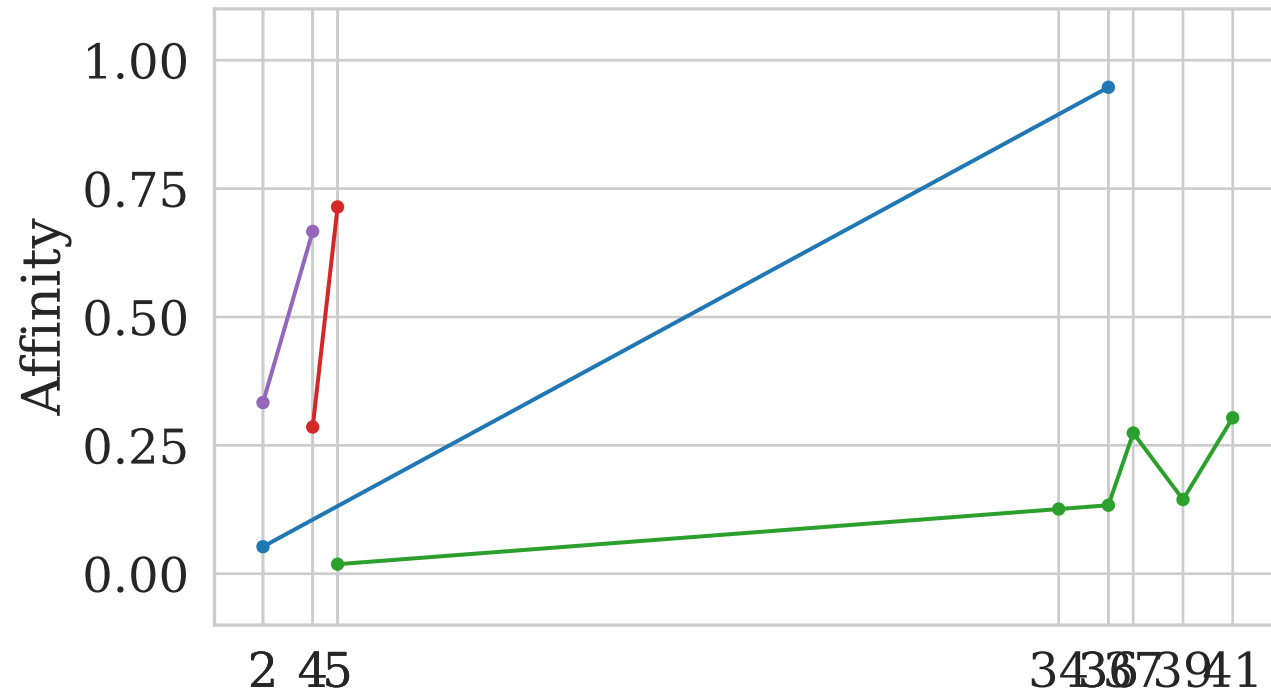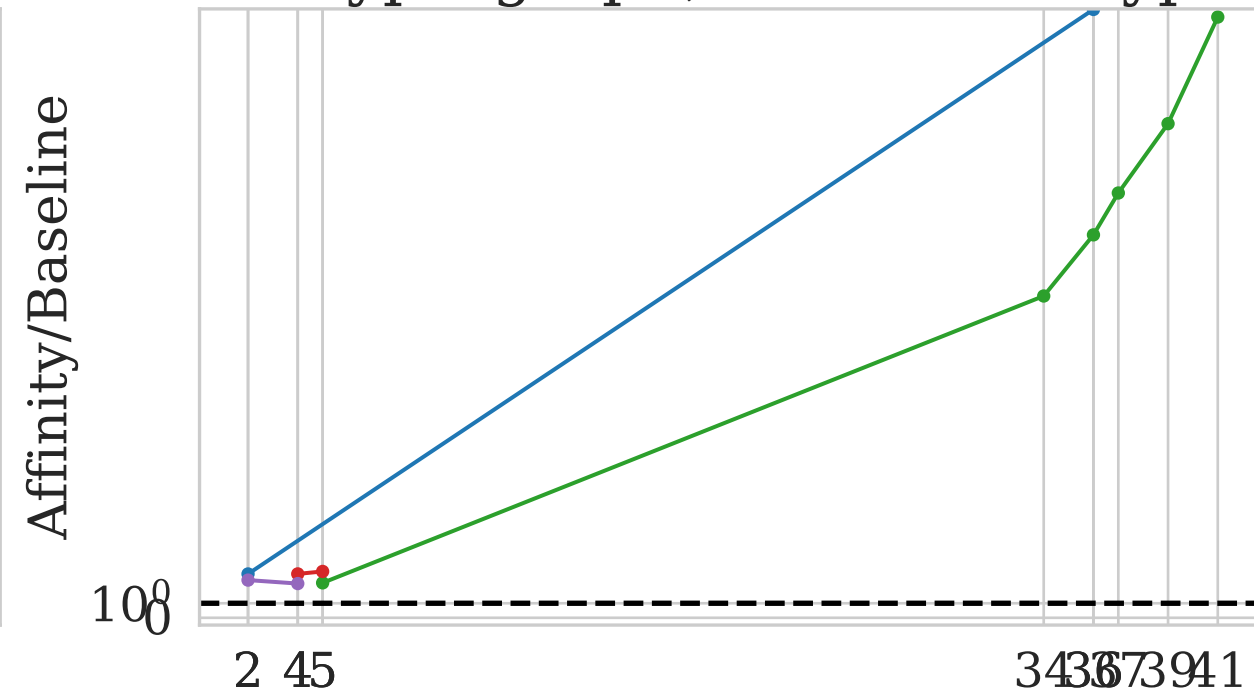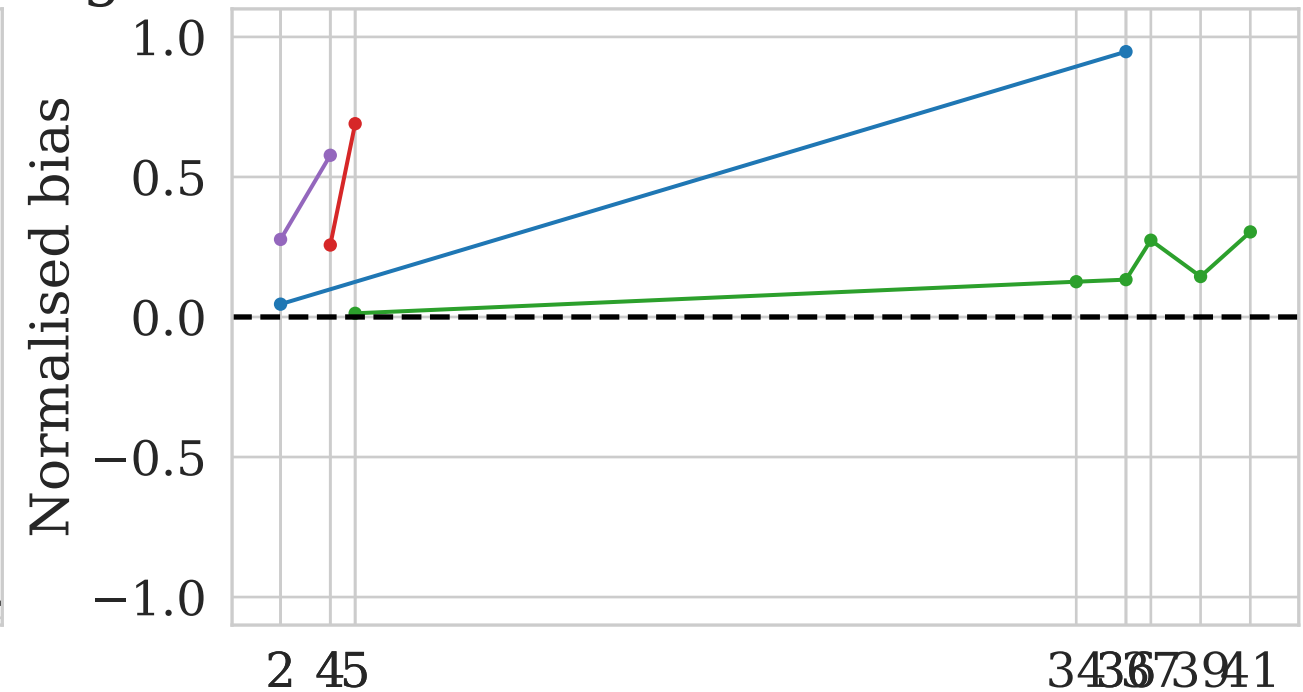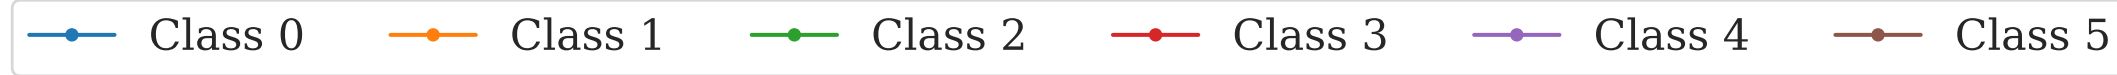

38-uniform hypergraph, number of hyperedges: 7

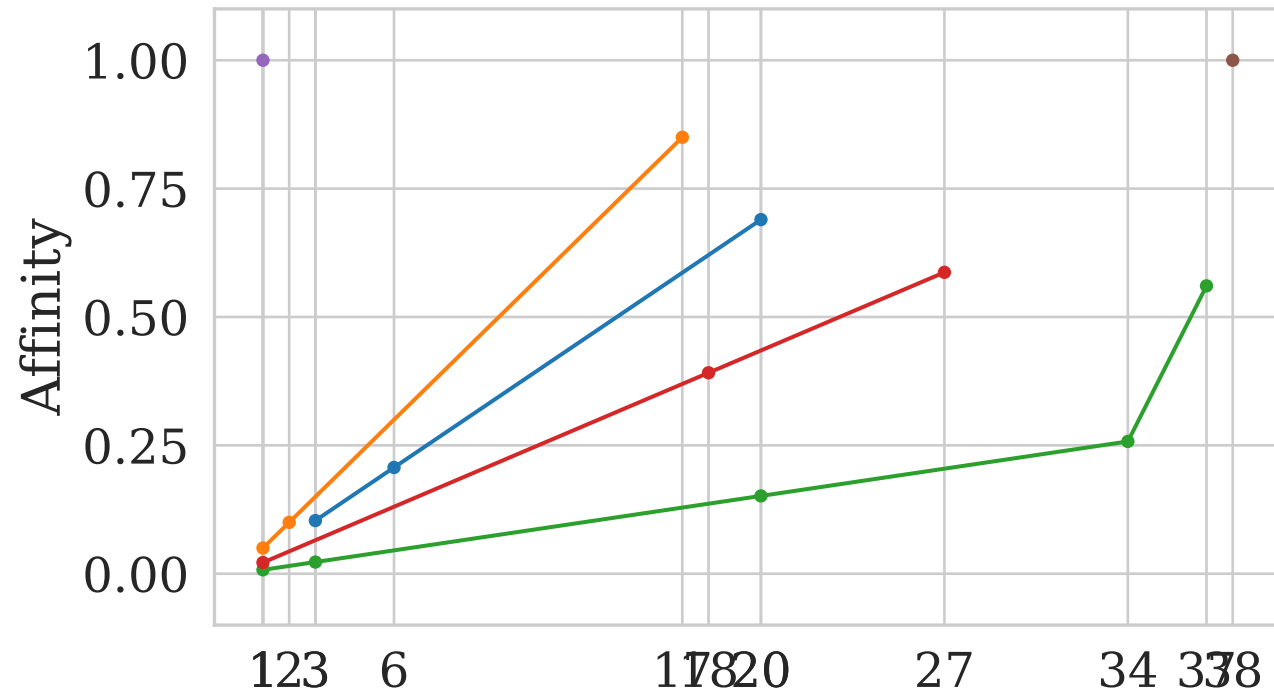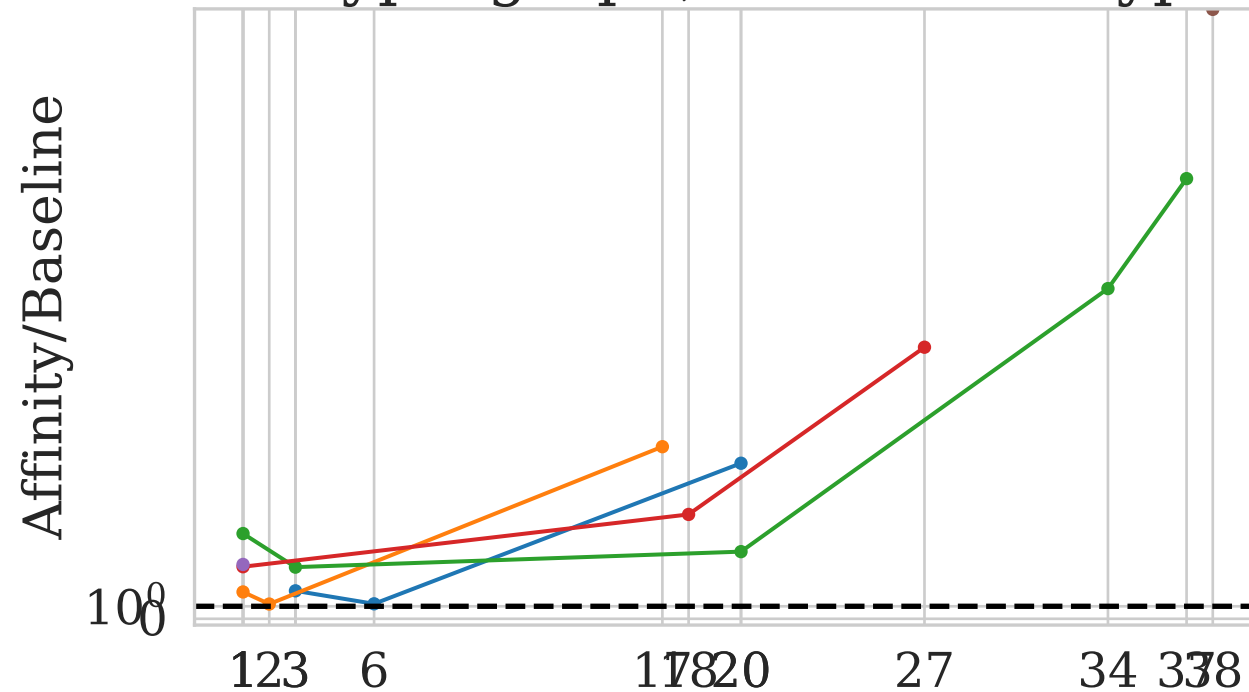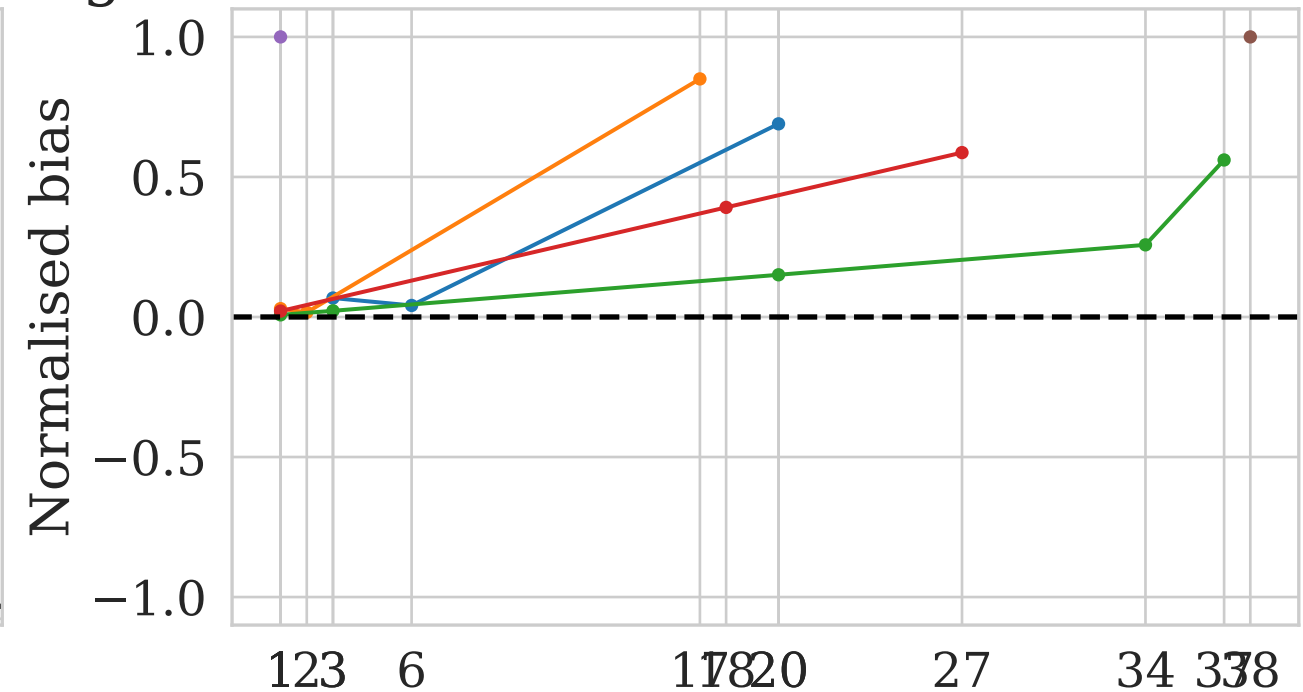

Class 0 Class 1 Class 2 Class 3 Class 4 Class 5

39-uniform hypergraph, number of hyperedges: 6

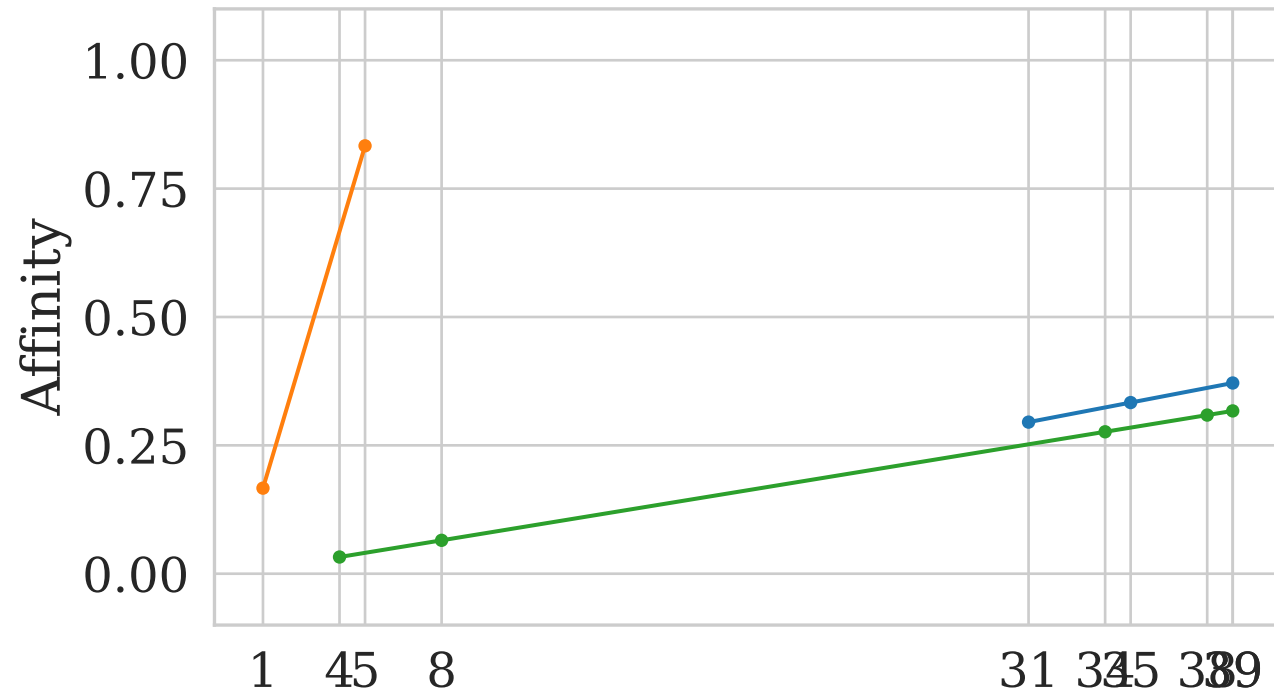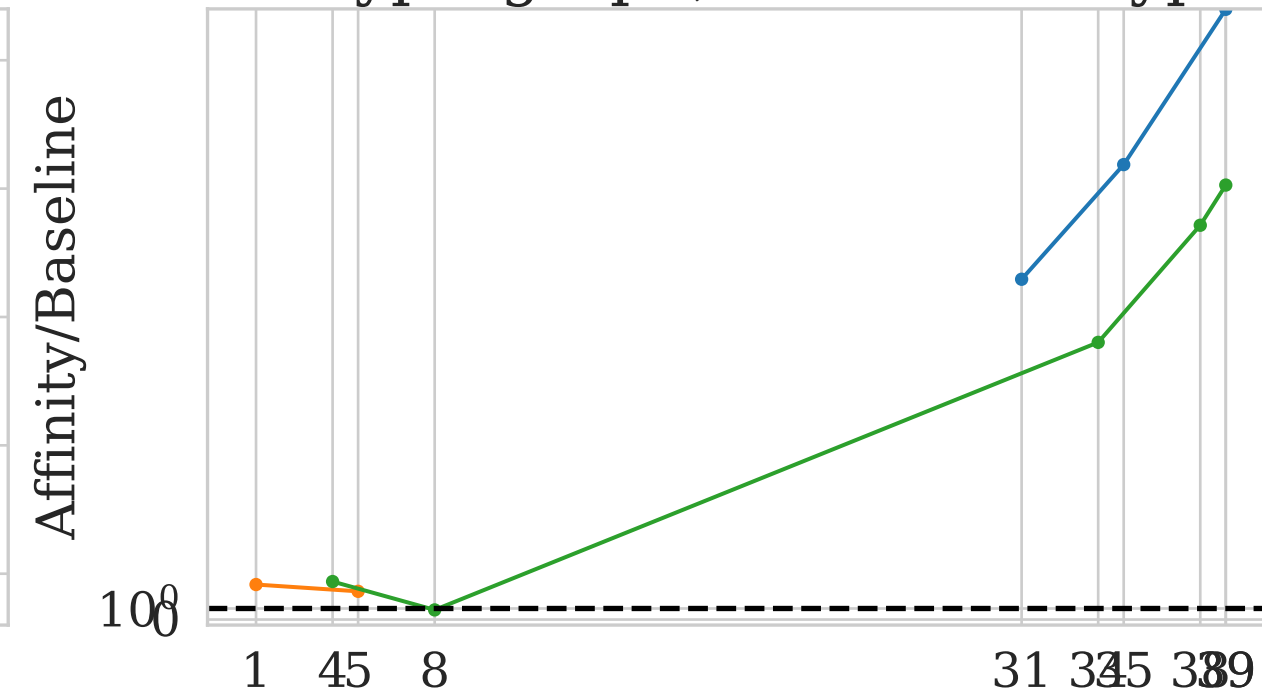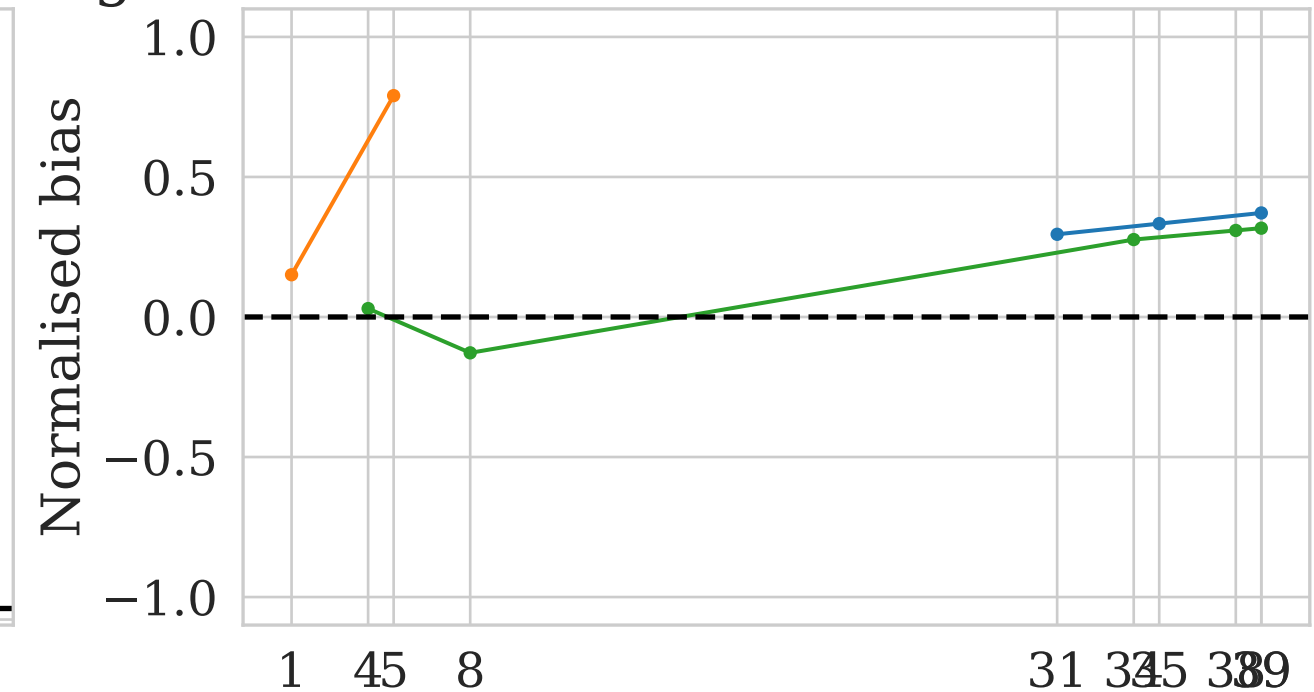

Class 0 Class 1 Class 2 Class 3 Class 4 Class 5

42-uniform hypergraph, number of hyperedges: 6

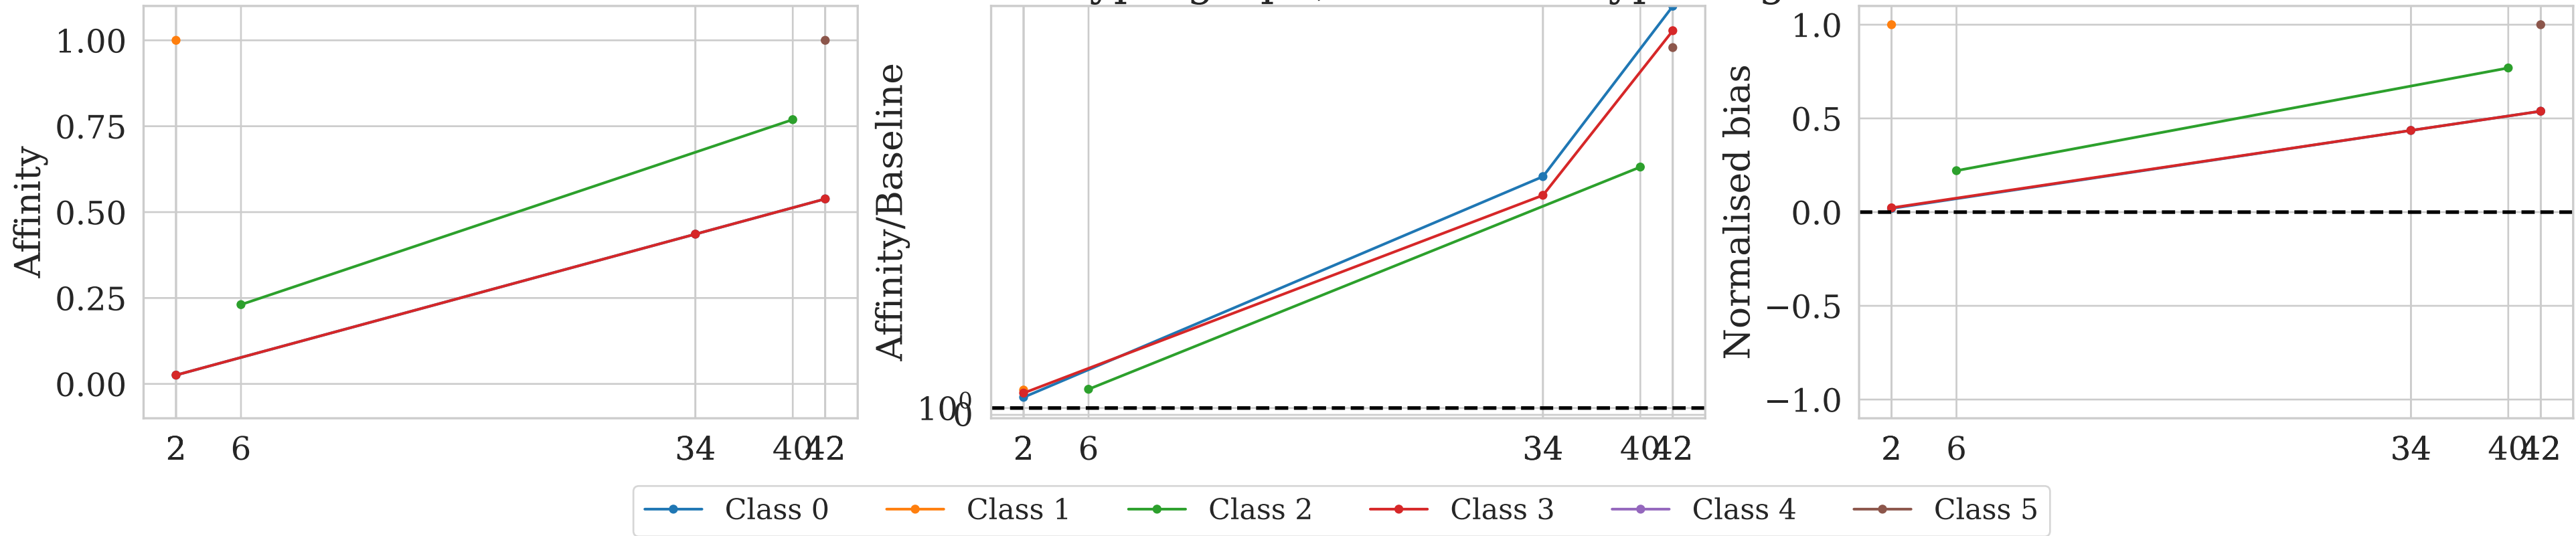

36-uniform hypergraph, number of hyperedges: 6

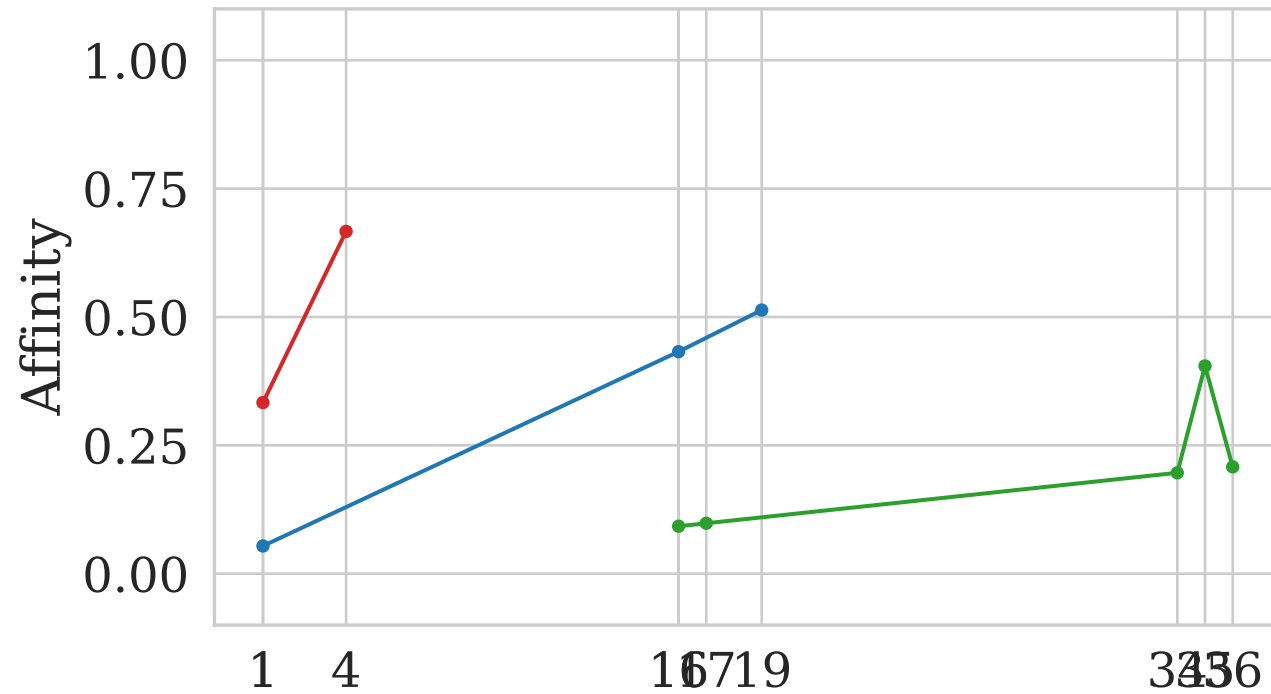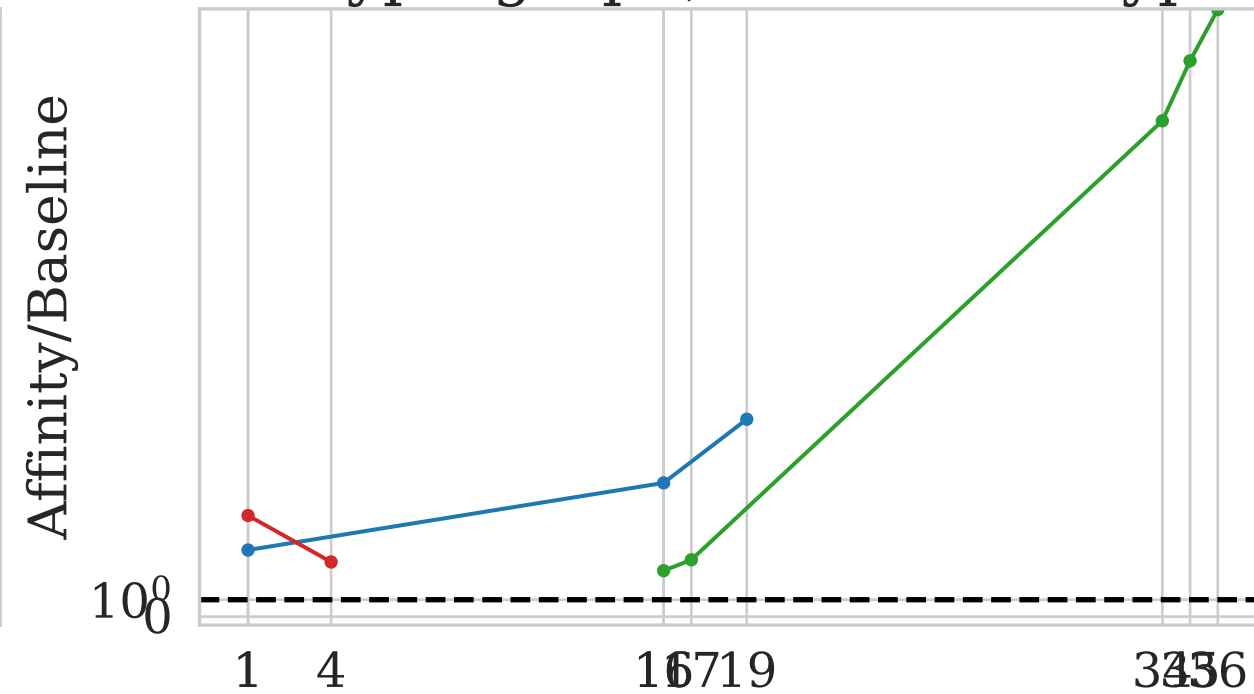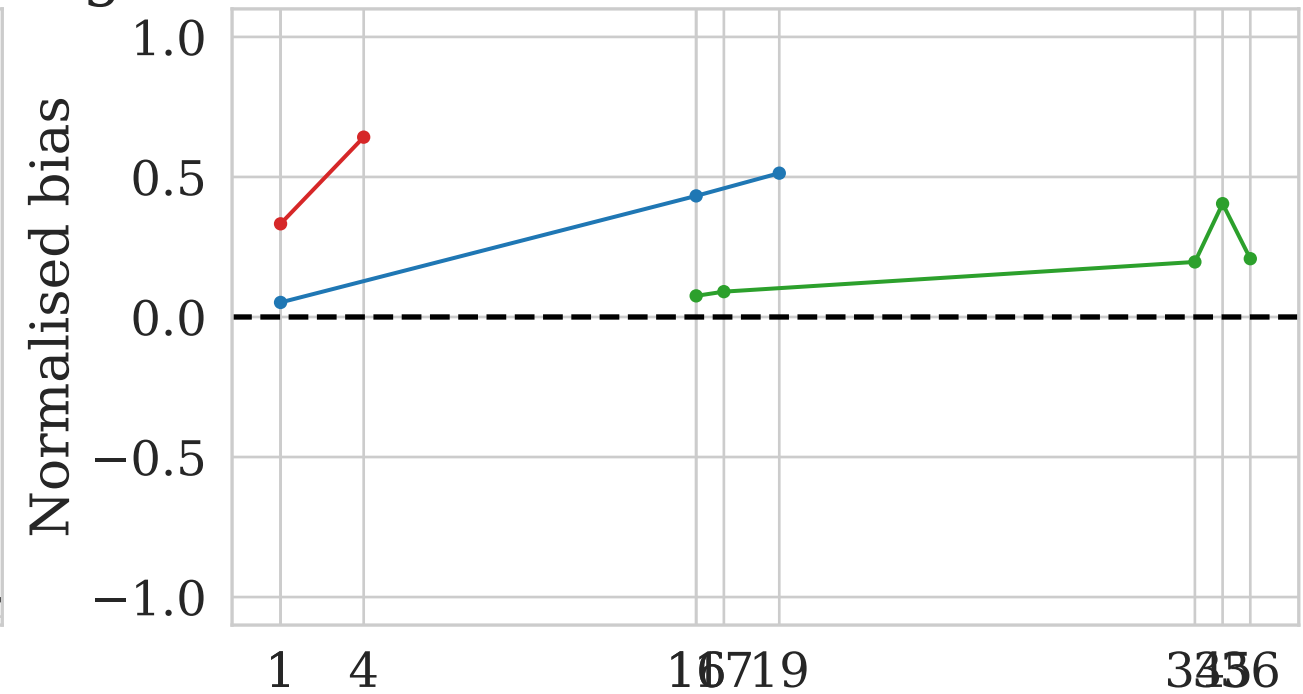

Class 0 Class 1 Class 2 Class 3 Class 4 Class 5



44-uniform hypergraph, number of hyperedges: 5

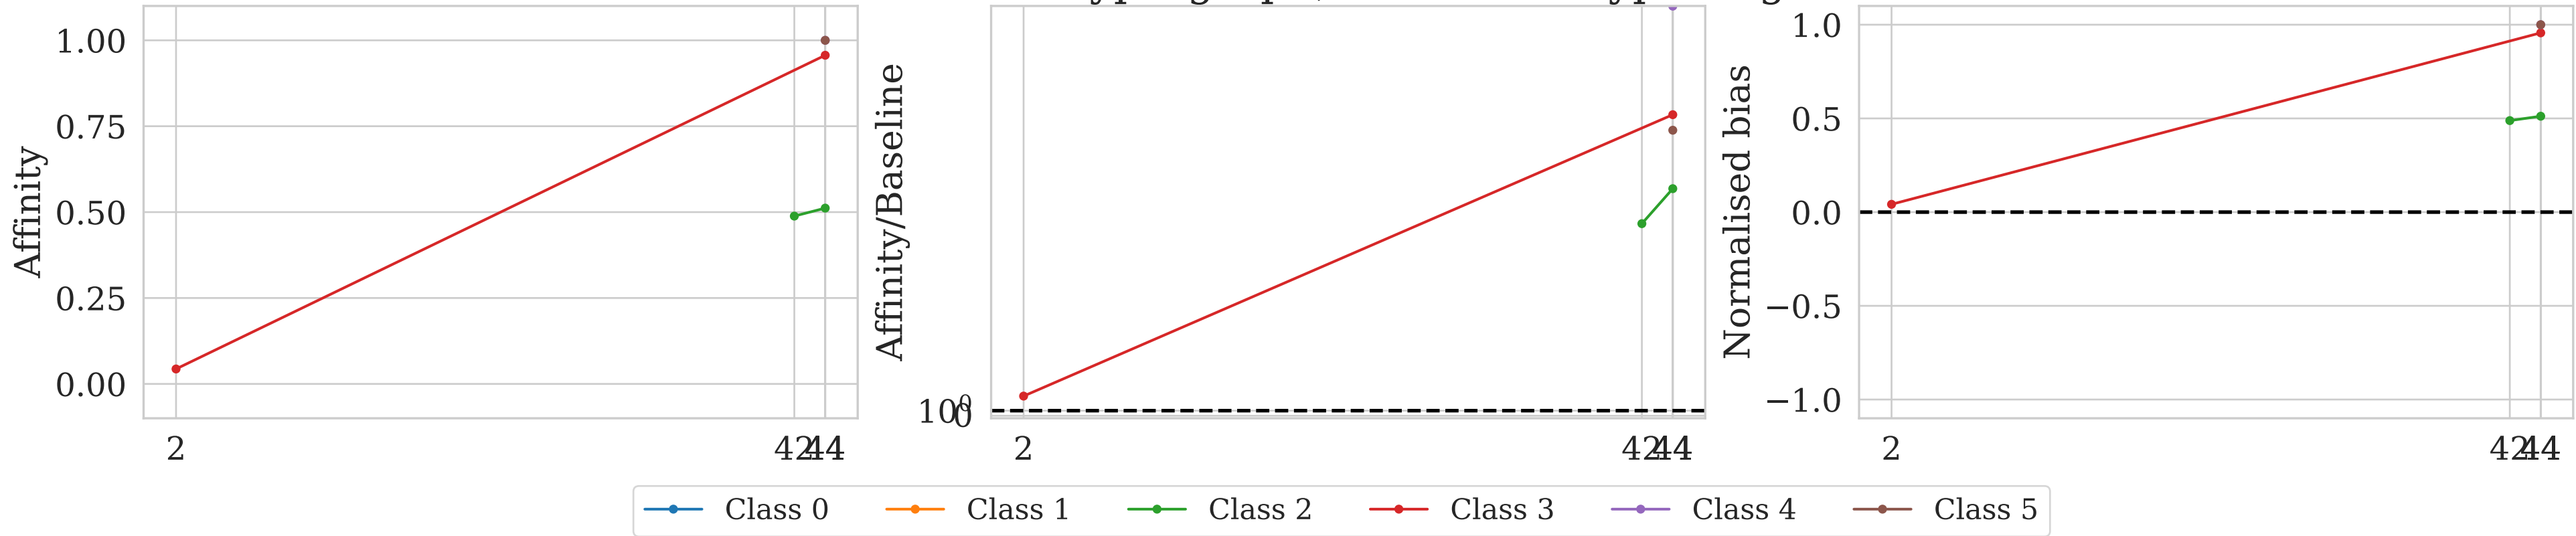

54-uniform hypergraph, number of hyperedges: 5

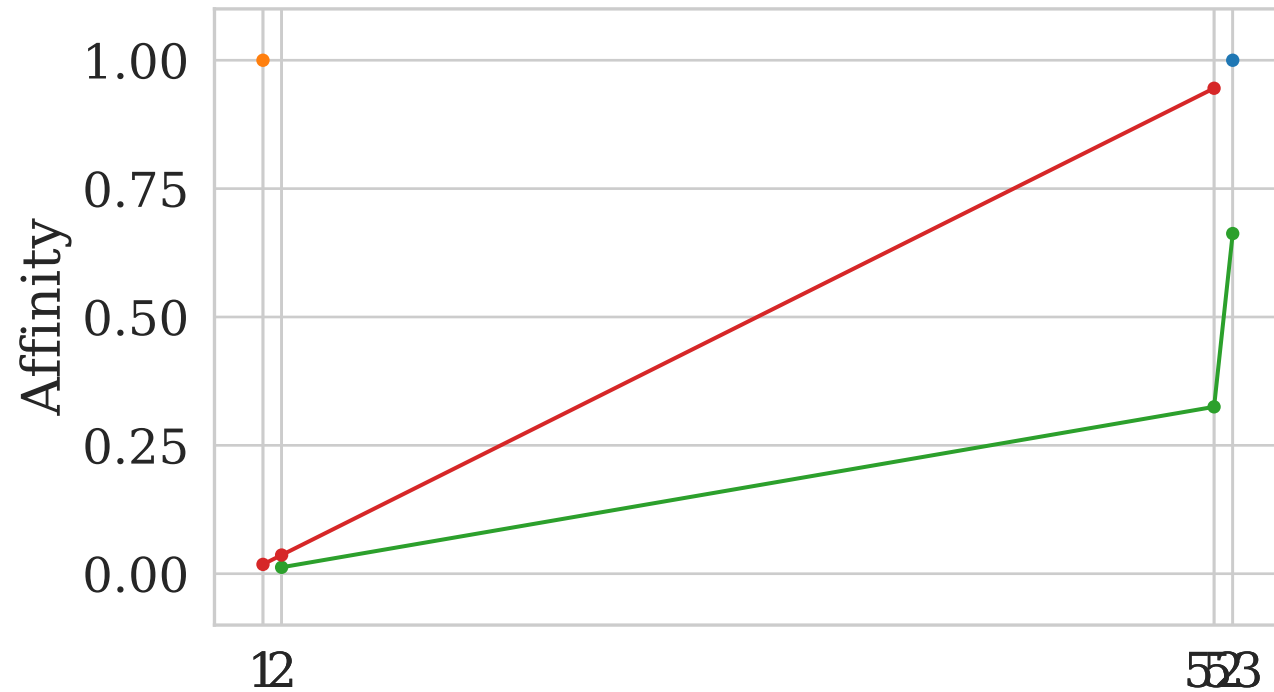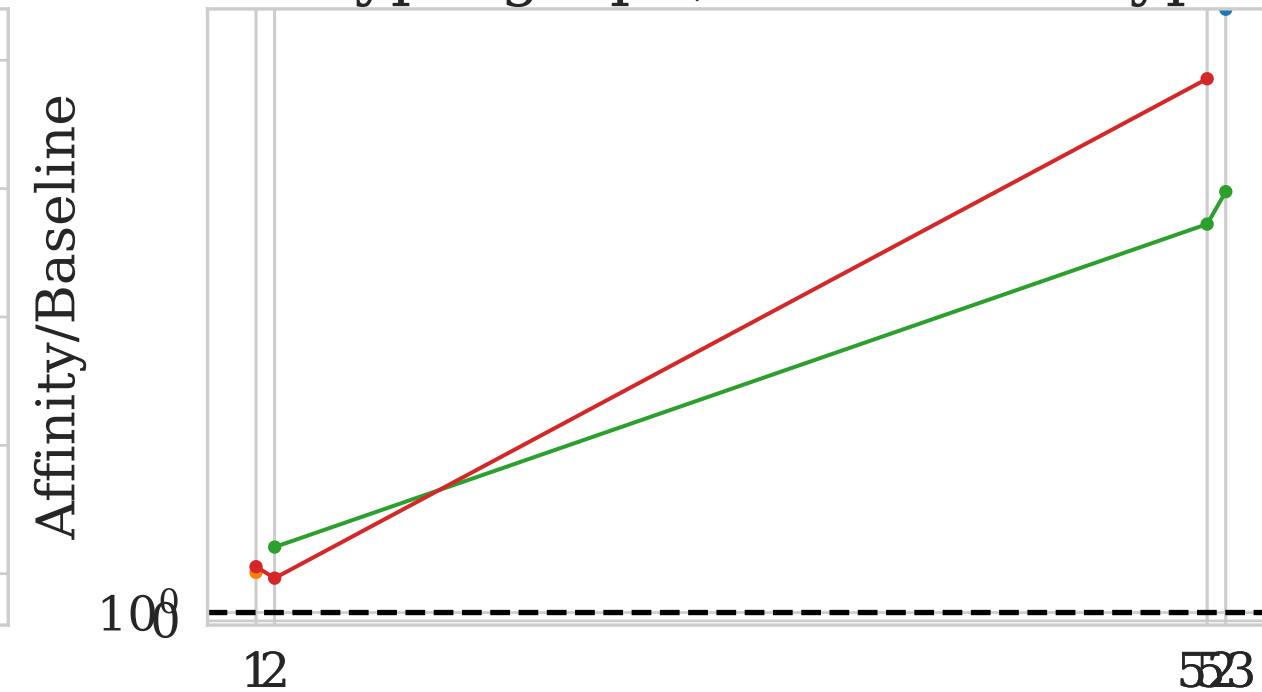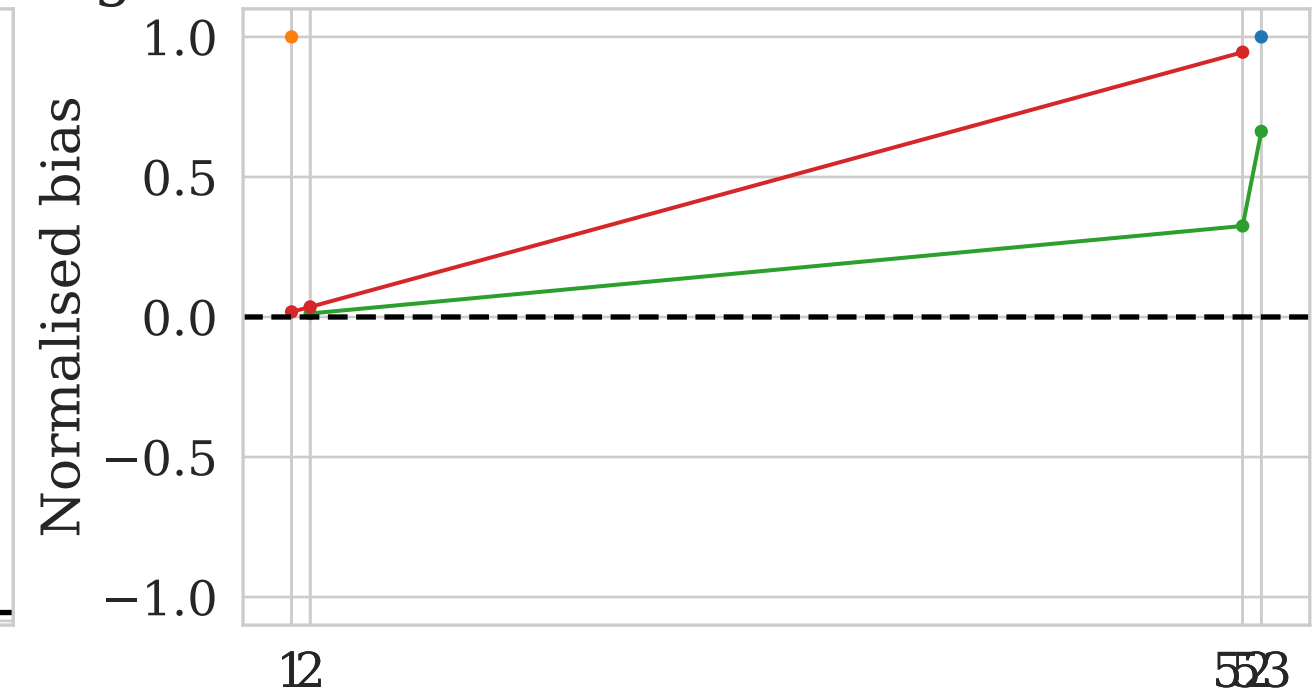

Class 0 Class 1 Class 2 Class 3 Class 4 Class 5

45-uniform hypergraph, number of hyperedges: 4

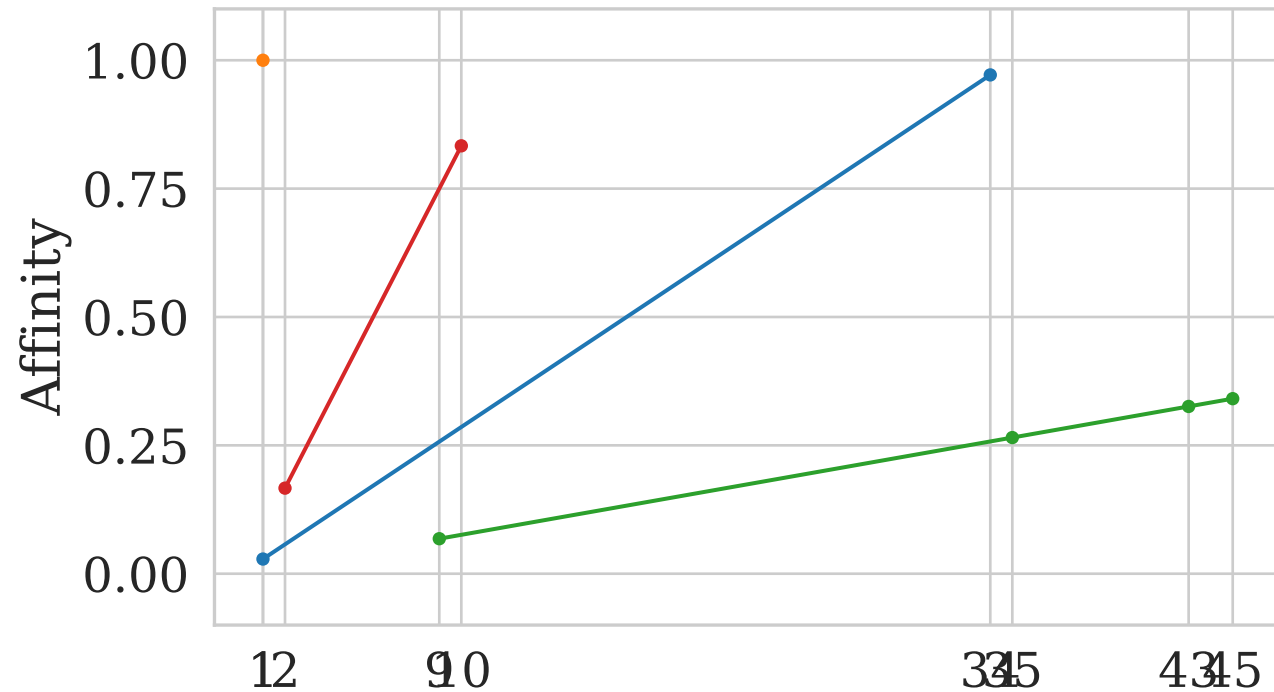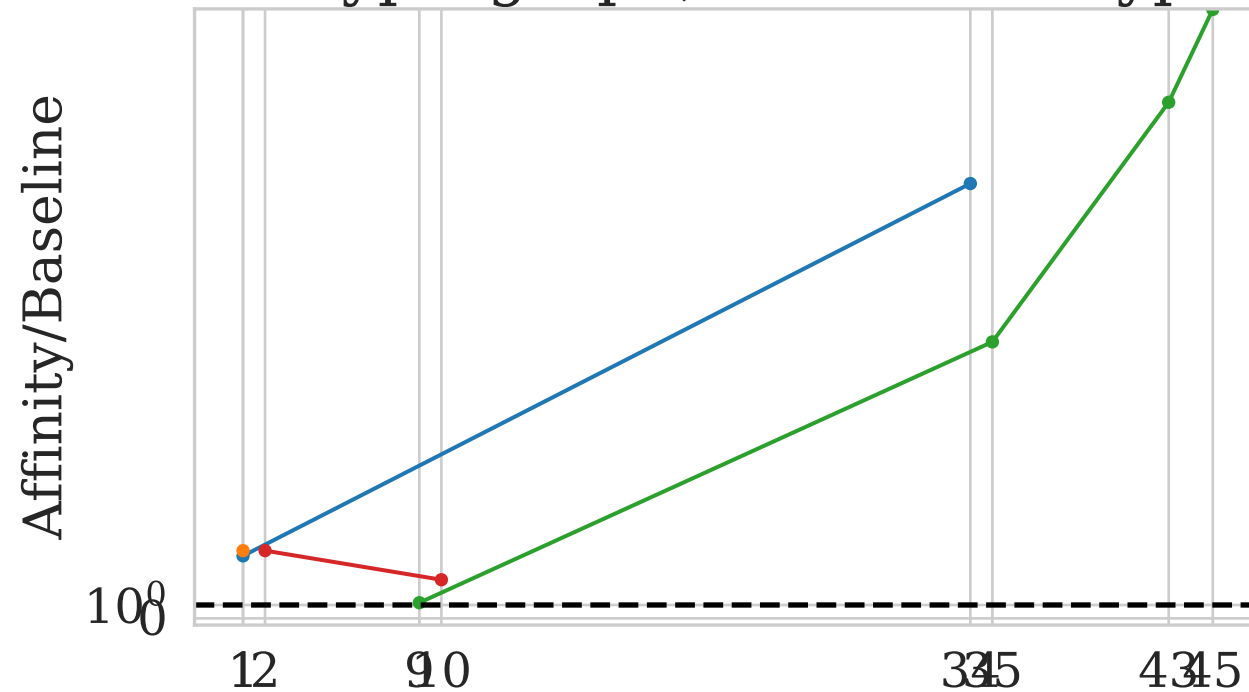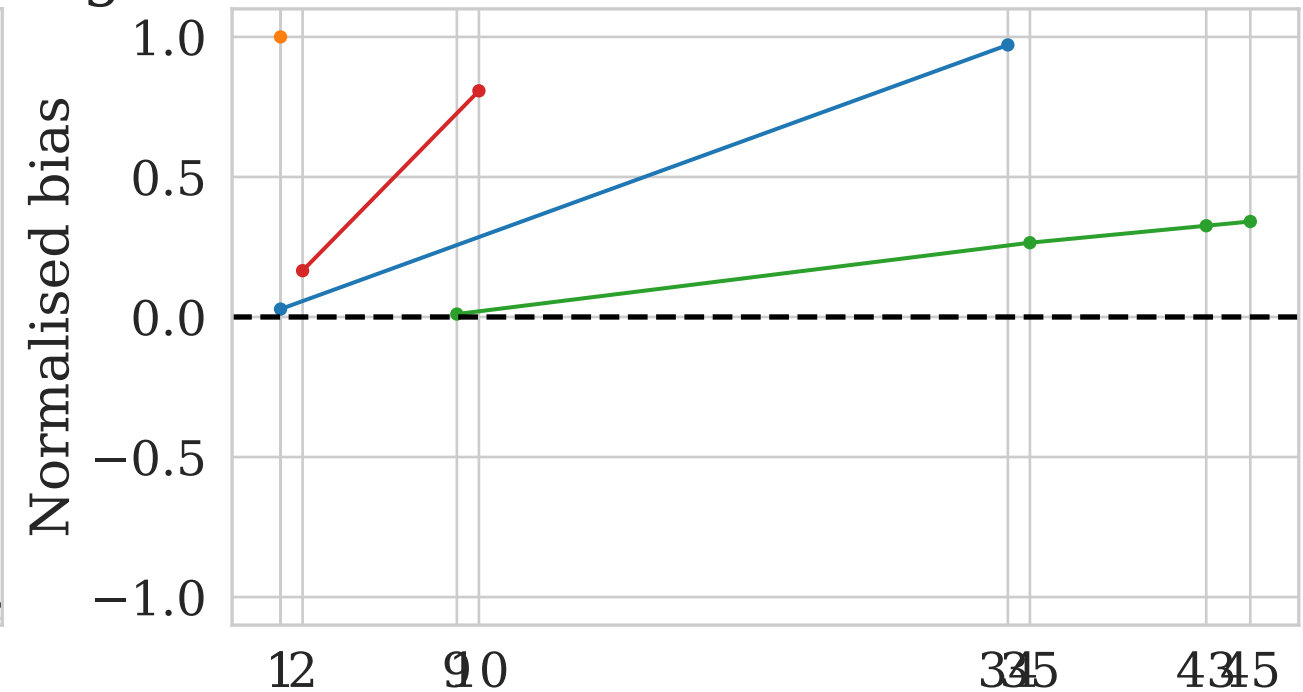

Class 0 Class 1 Class 2 Class 3 Class 4 Class 5

61-uniform hypergraph, number of hyperedges: 3

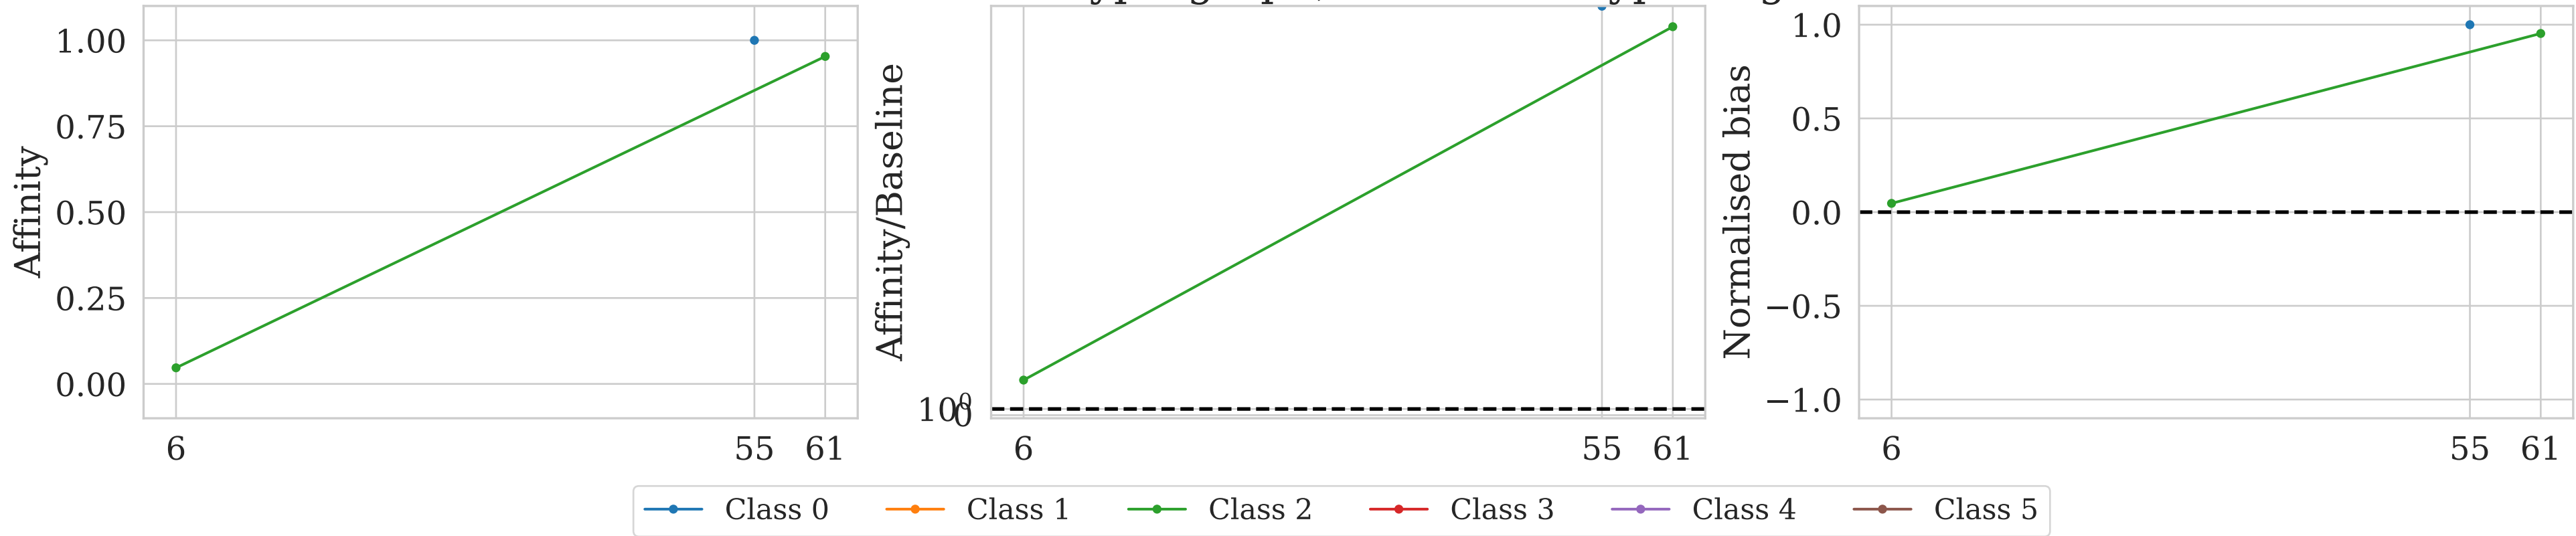

46-uniform hypergraph, number of hyperedges: 3

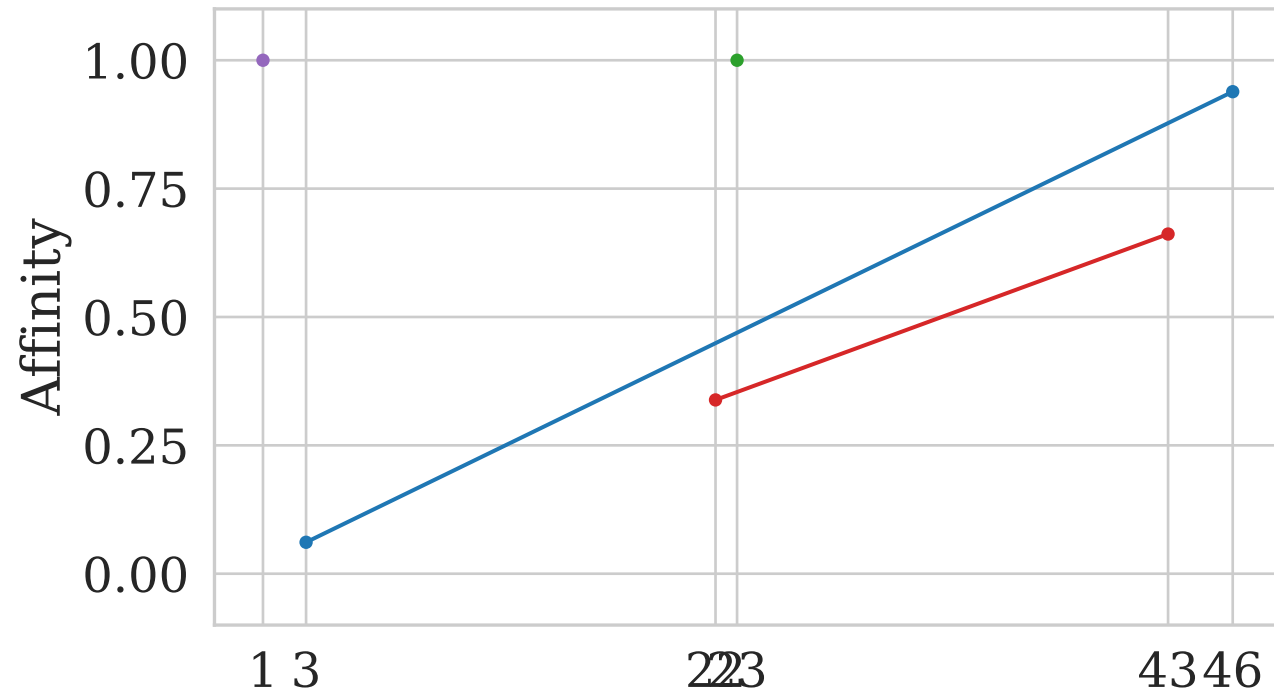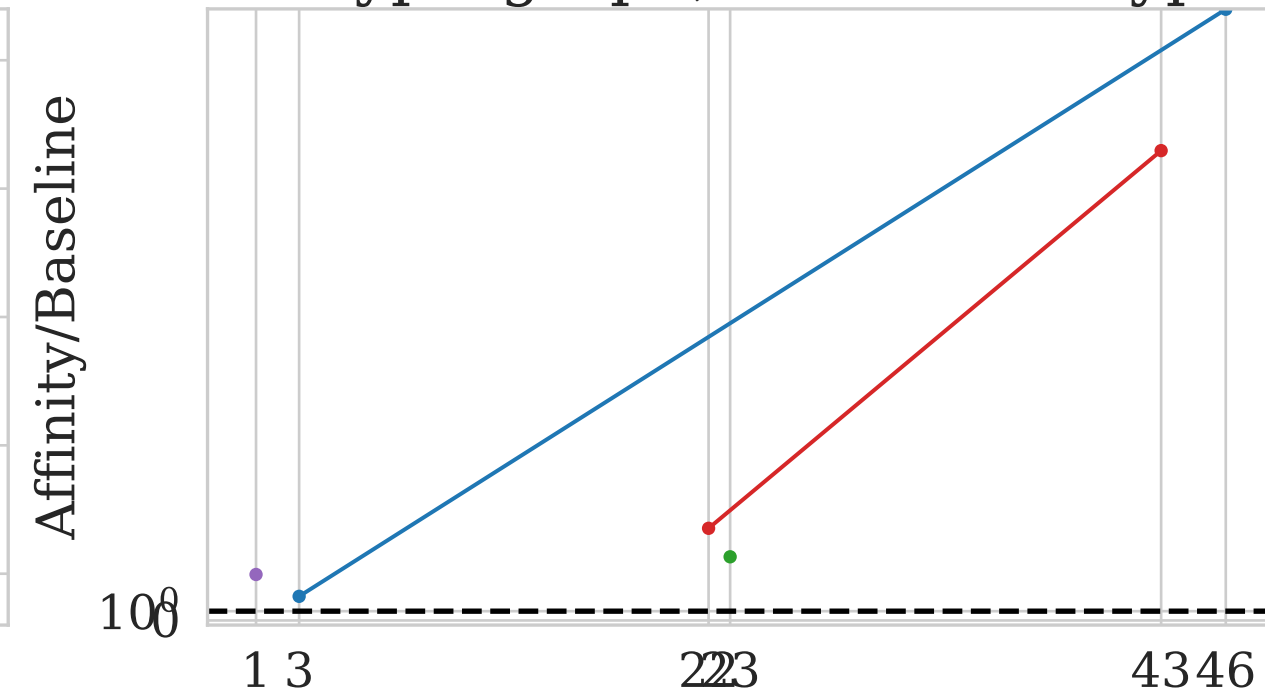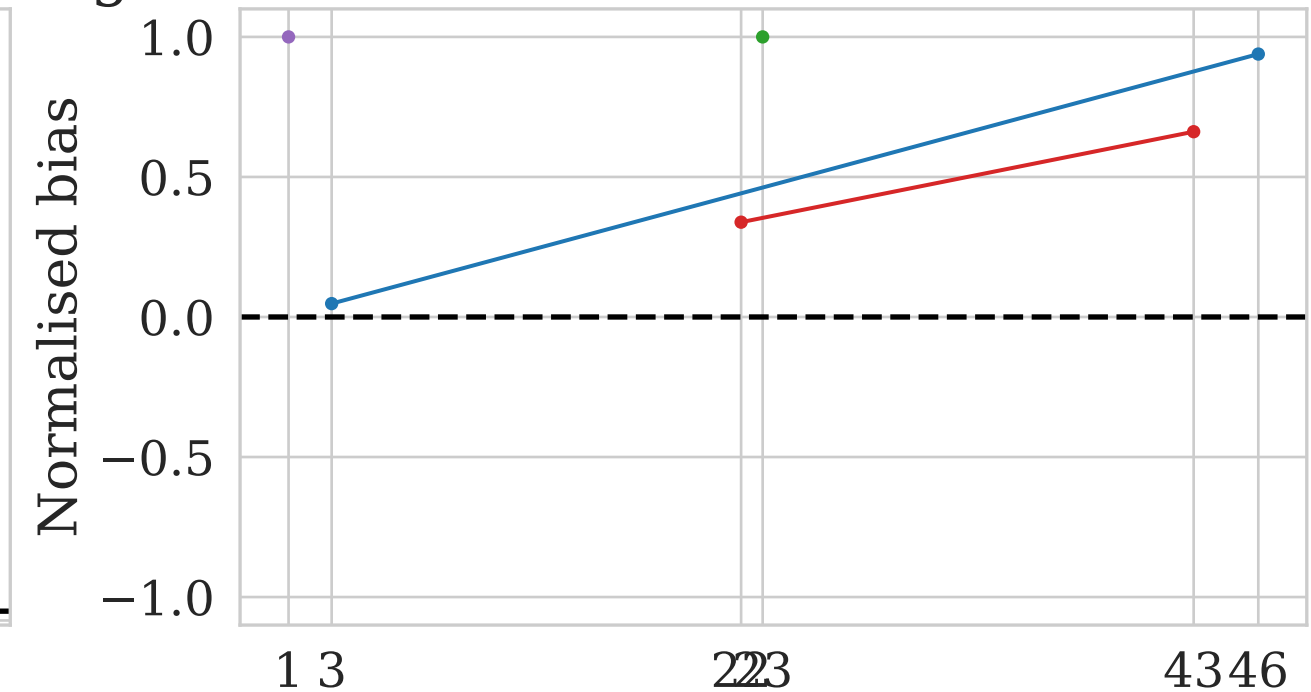

Class 0 Class 1 Class 2 Class 3 Class 4 Class 5

47-uniform hypergraph, number of hyperedges: 3

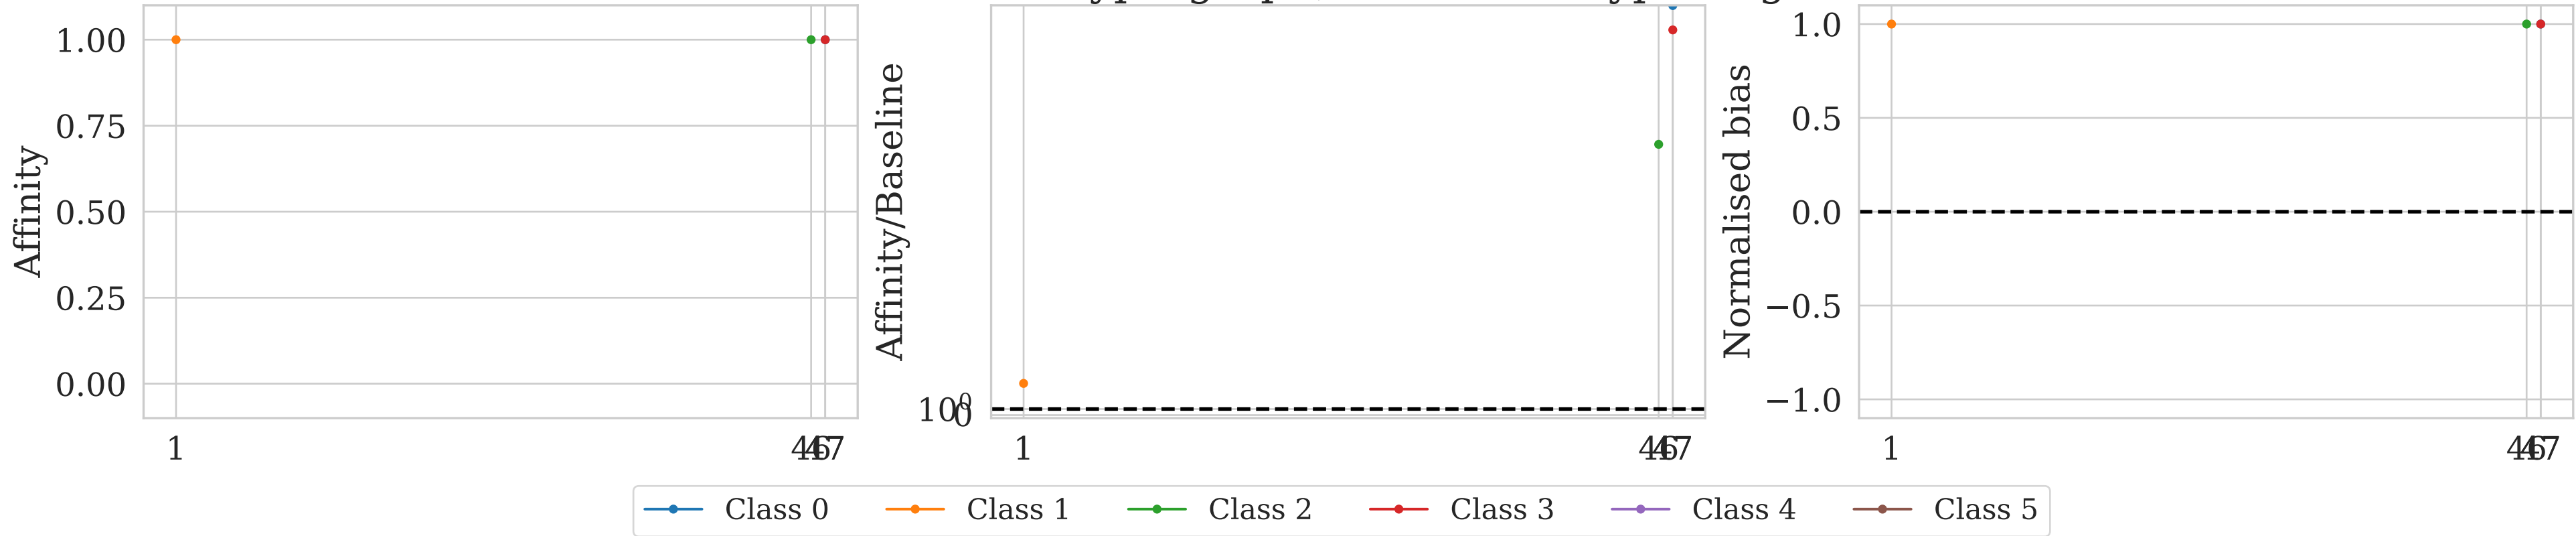

40-uniform hypergraph, number of hyperedges: 3

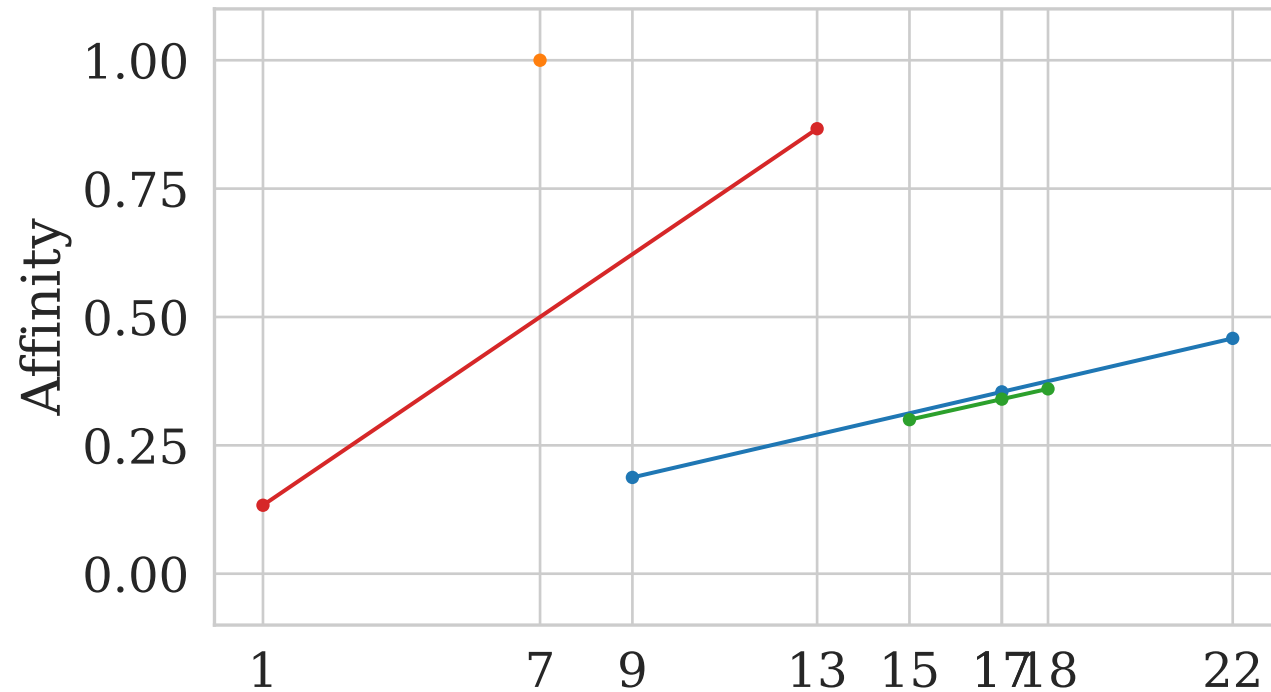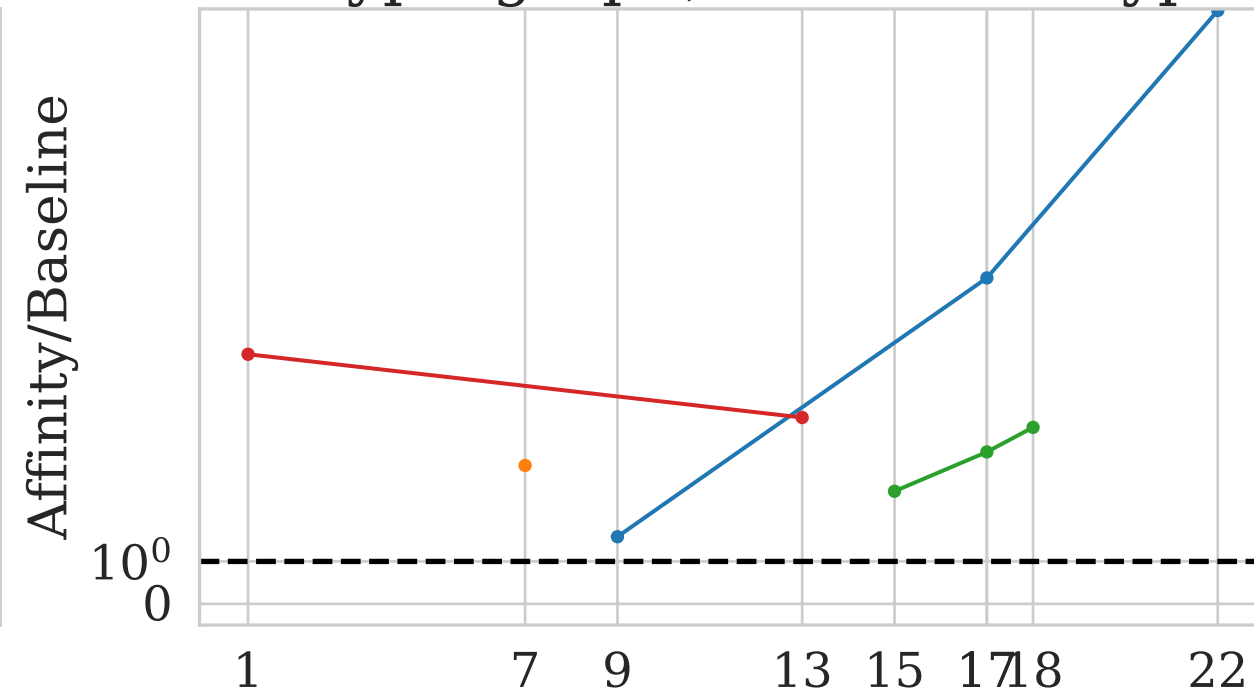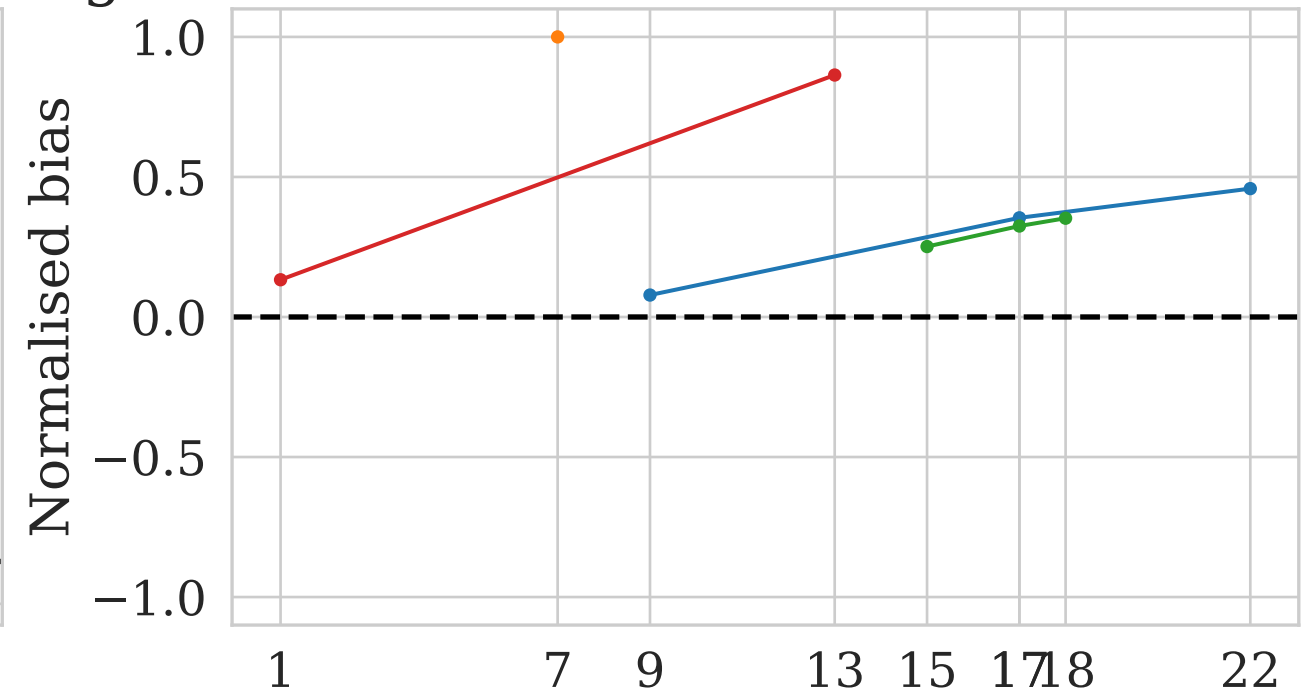

Class 0 Class 1 Class 2 Class 3 Class 4 Class 5

58-uniform hypergraph, number of hyperedges: 3

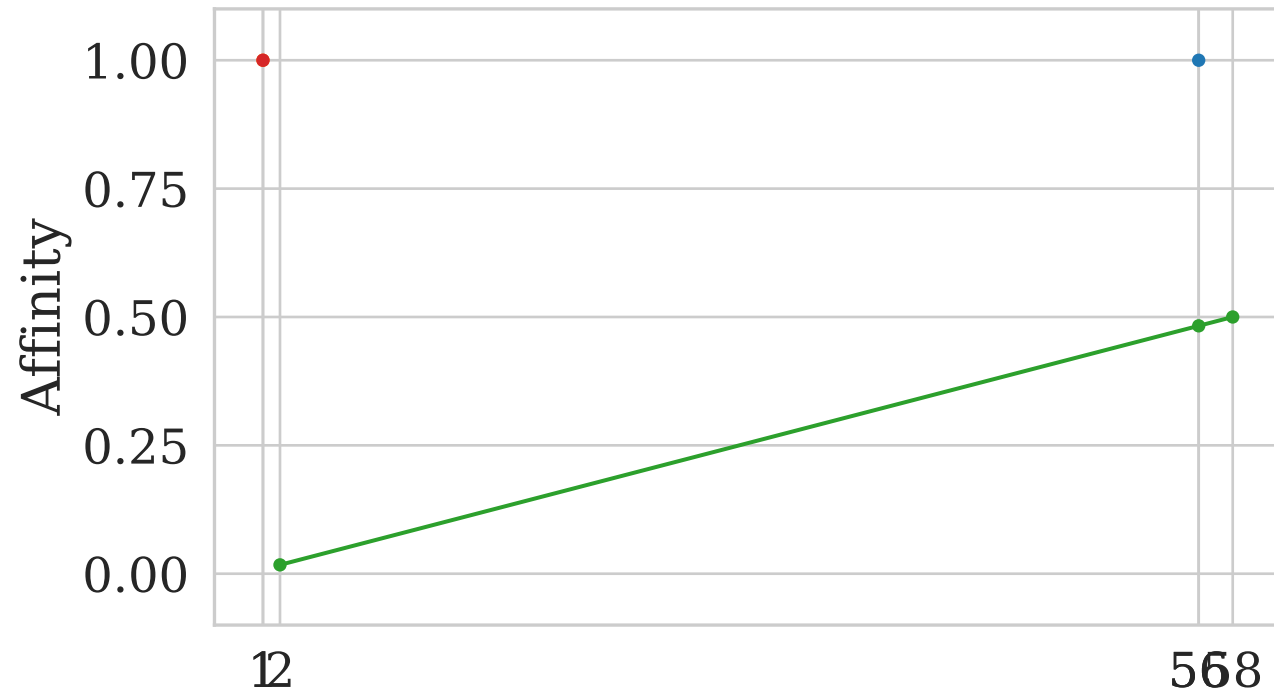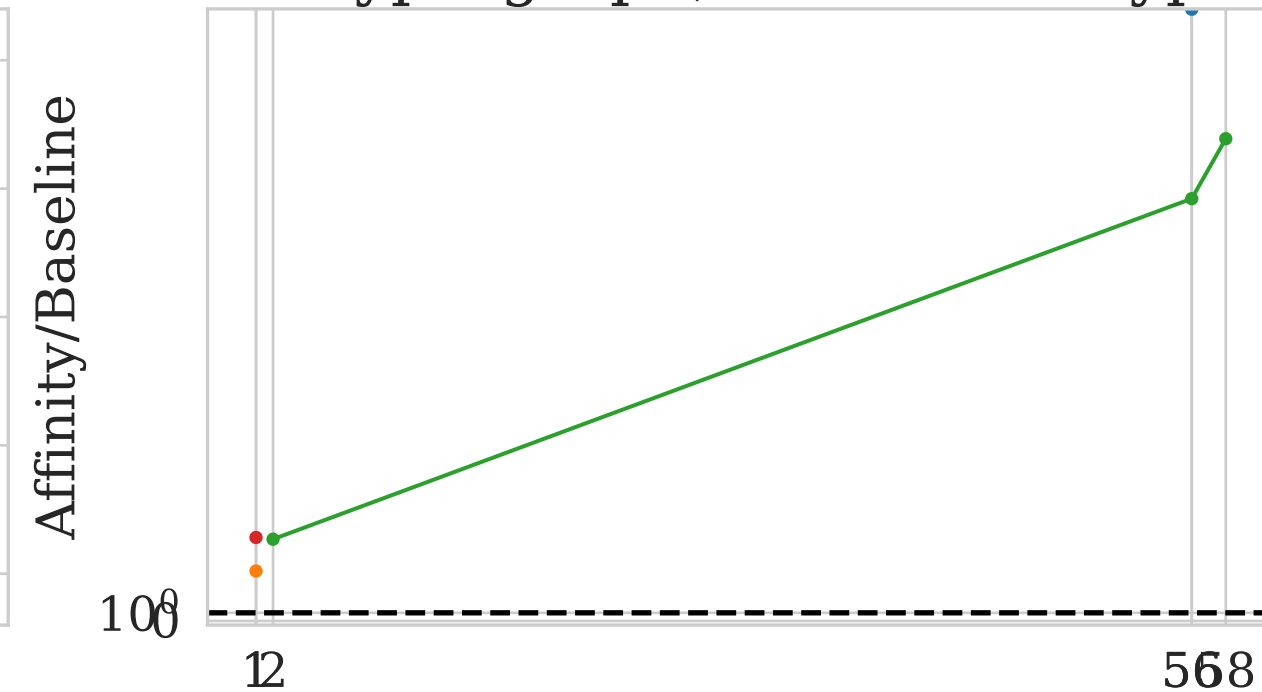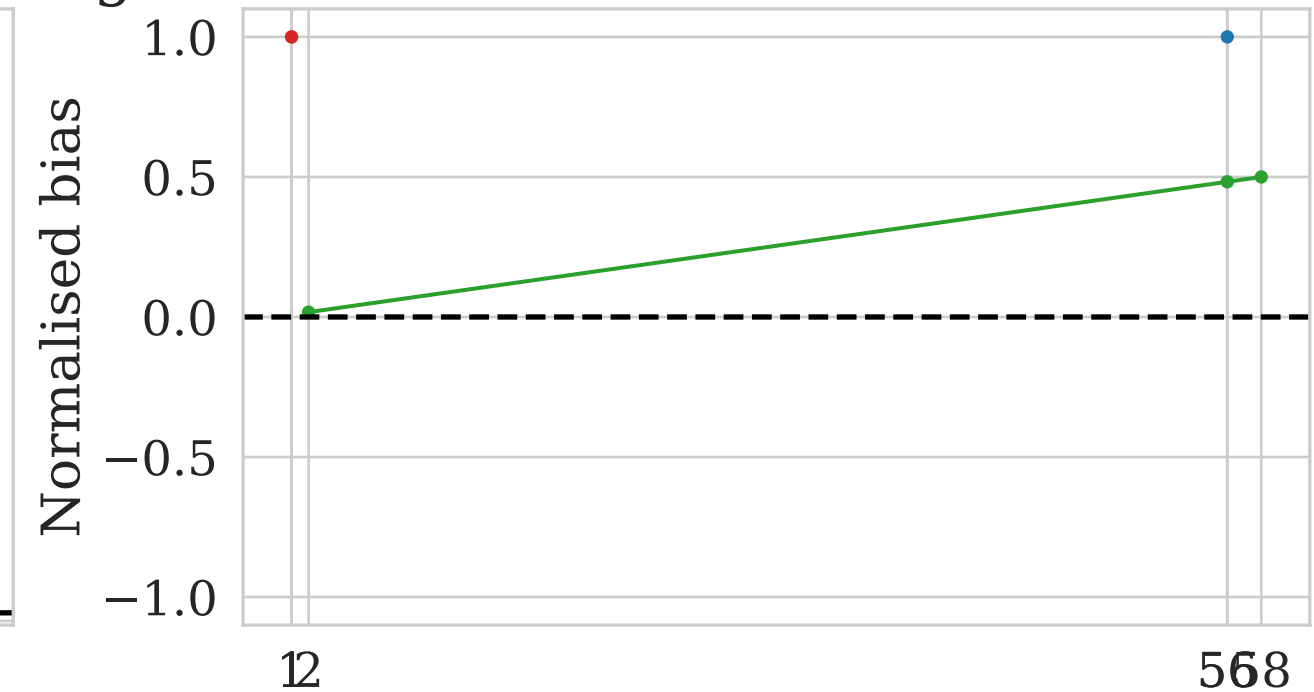

—●— Class 0
 —●— Class 1
 —●— Class 2
 —●— Class 3
 —●— Class 4
 —●— Class 5



56-uniform hypergraph, number of hyperedges: 2

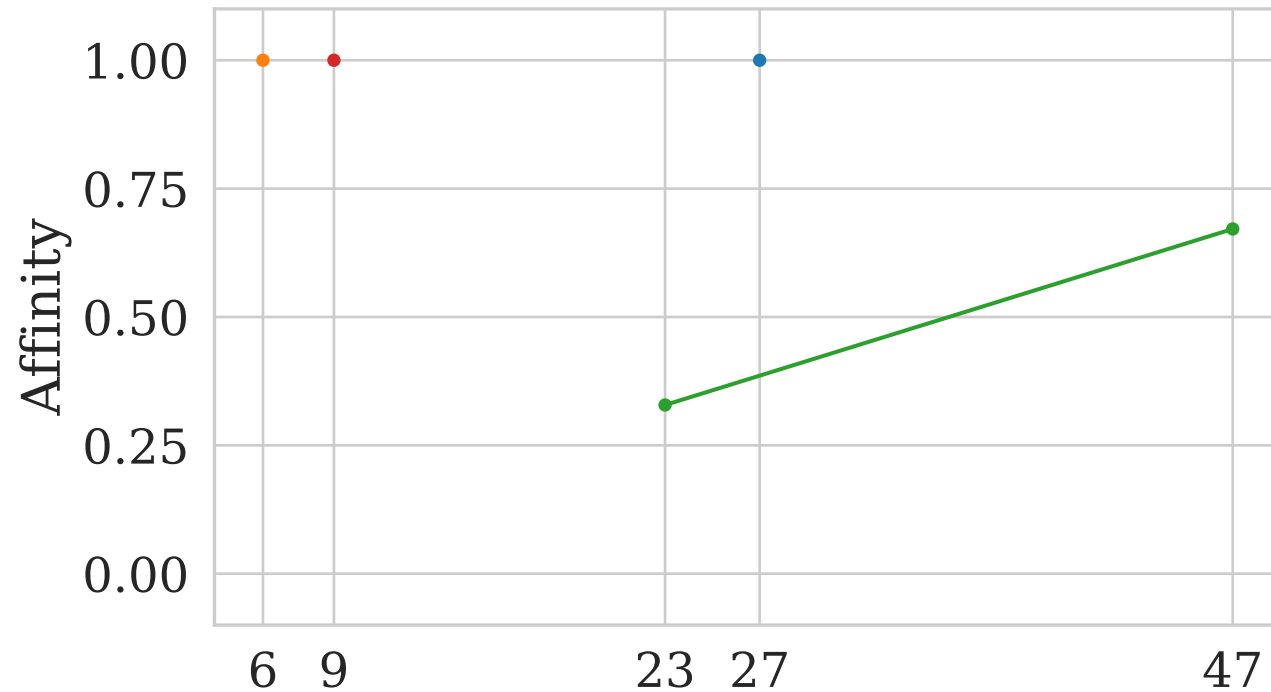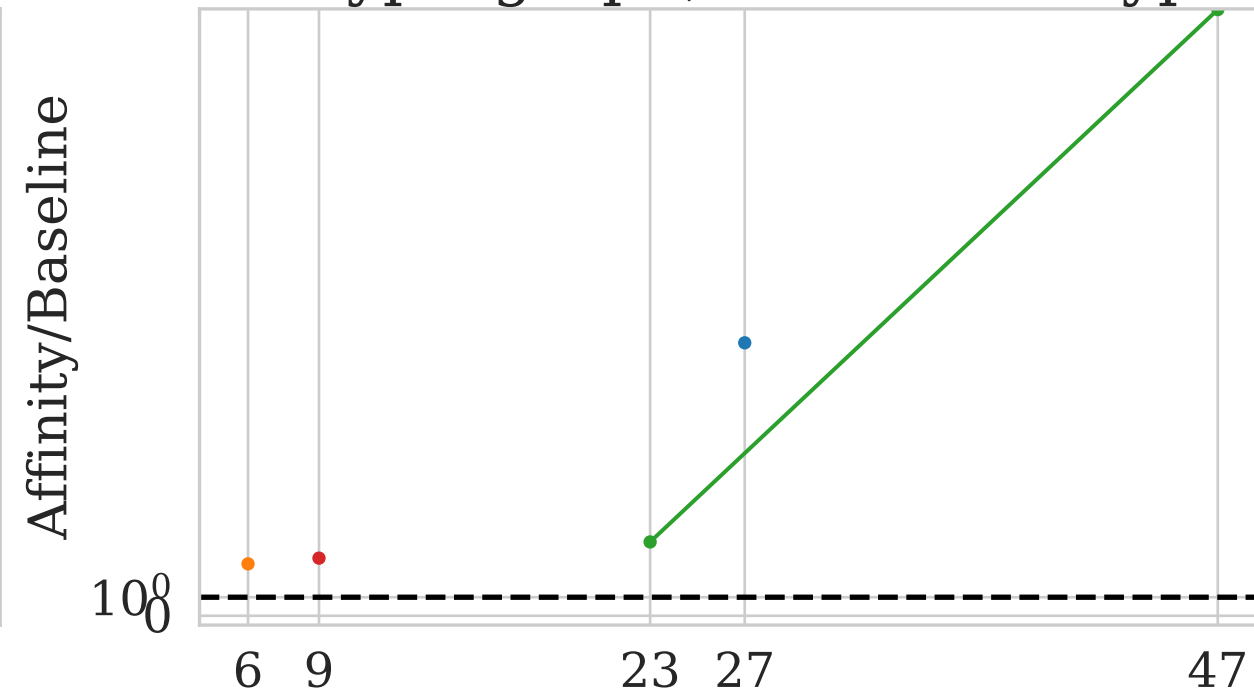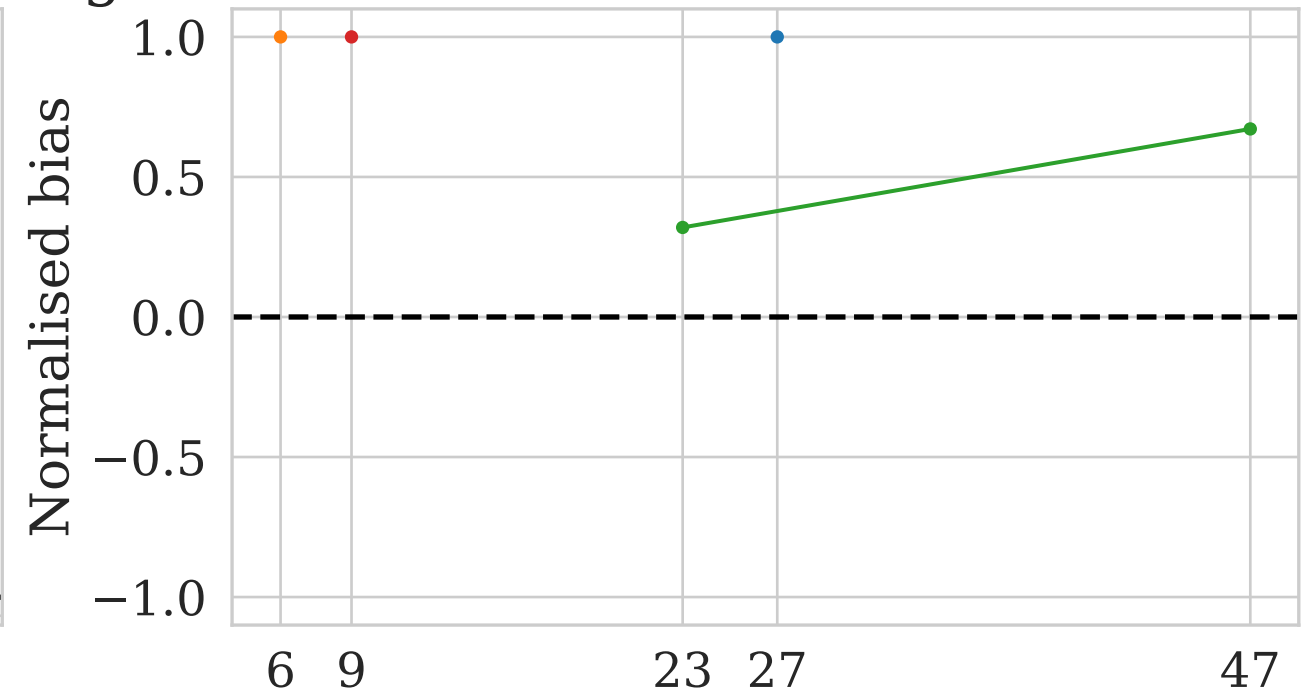

—●— Class 0   
 —●— Class 1   
 —●— Class 2   
 —●— Class 3   
 —●— Class 4   
 —●— Class 5

74-uniform hypergraph, number of hyperedges: 2

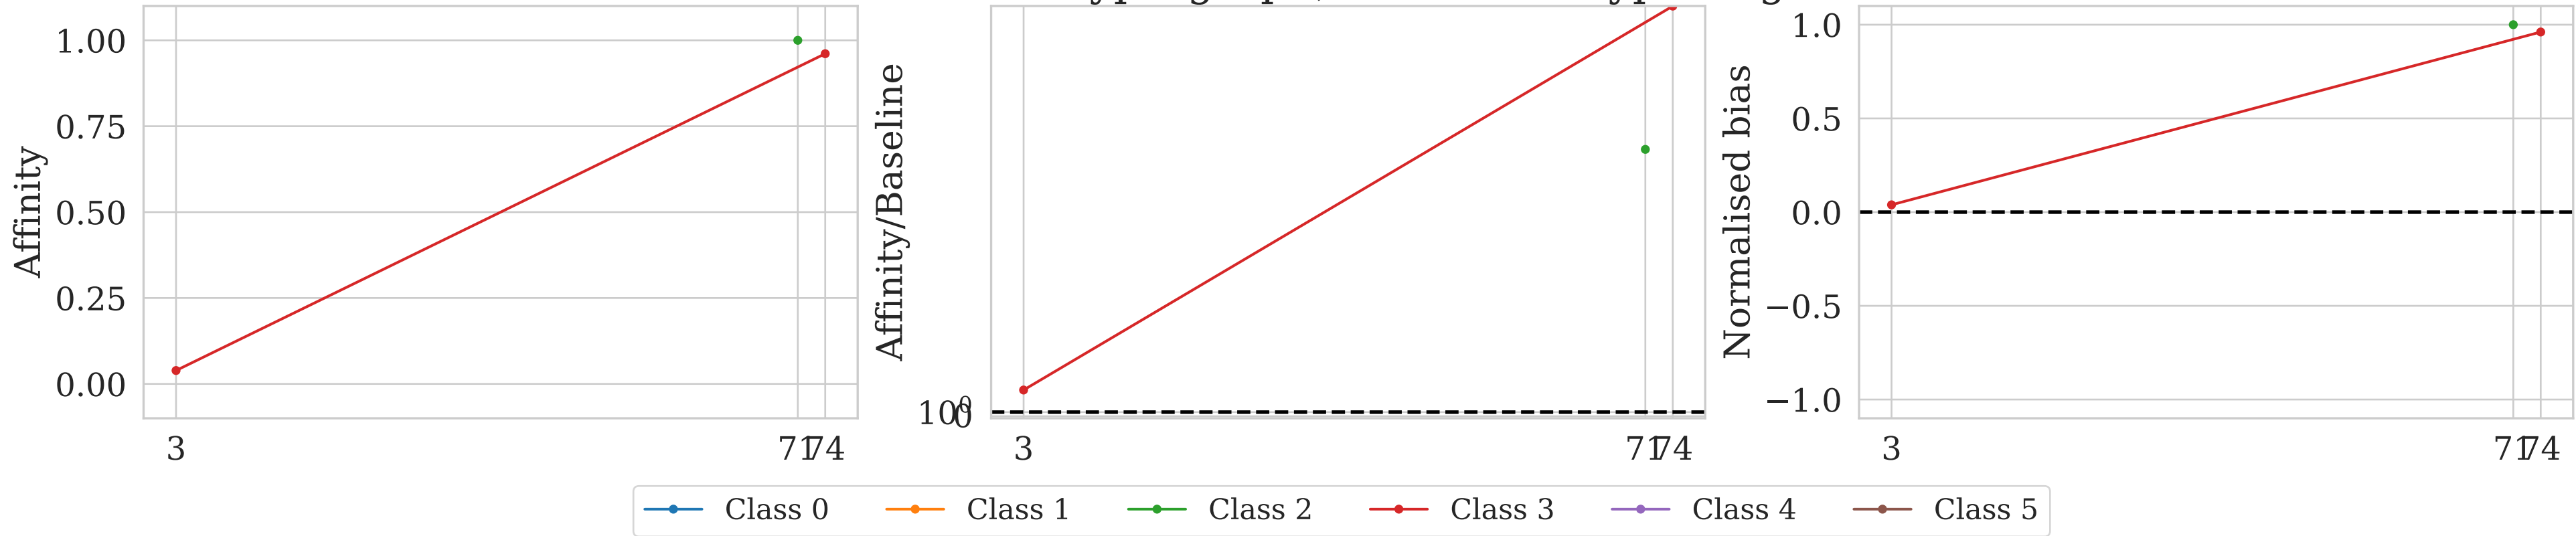

66-uniform hypergraph, number of hyperedges: 2

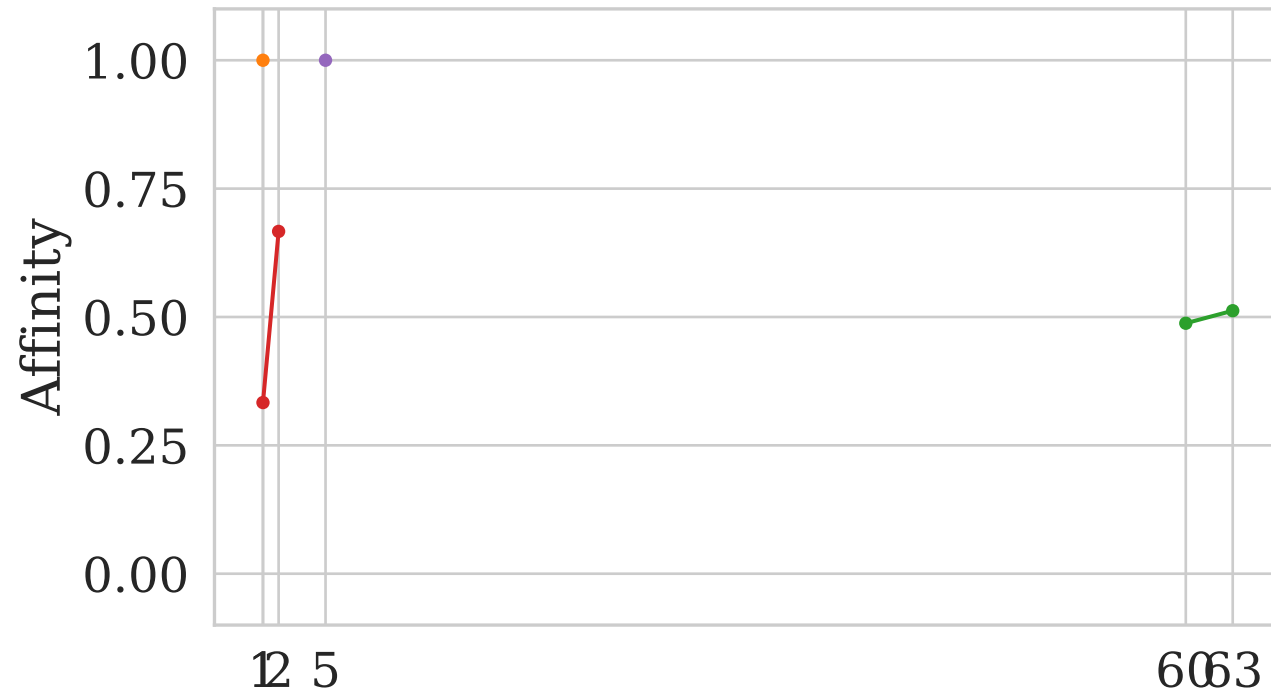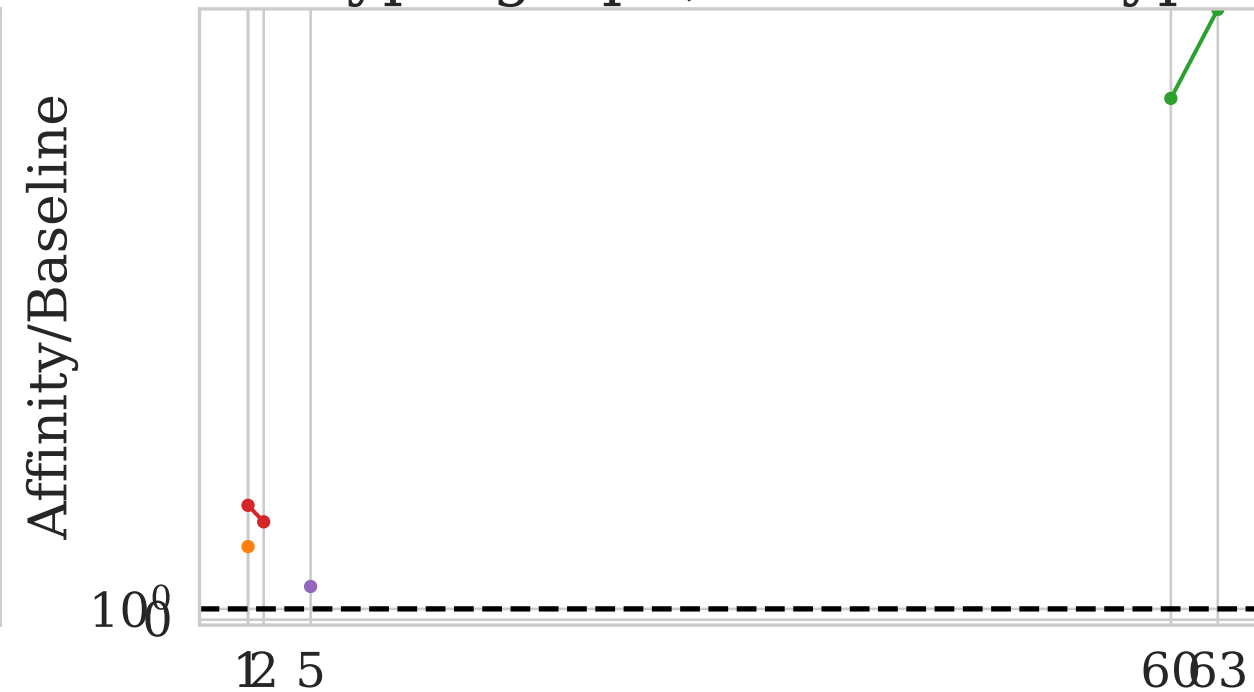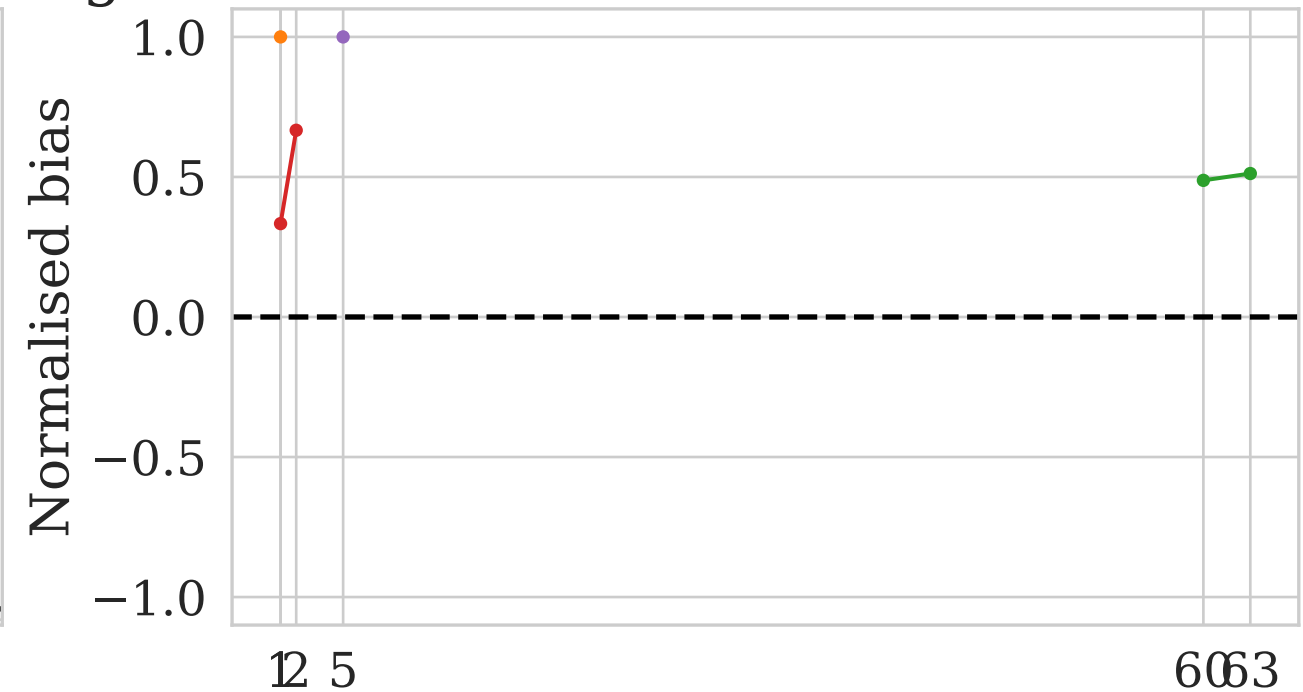

Class 0 Class 1 Class 2 Class 3 Class 4 Class 5

43-uniform hypergraph, number of hyperedges: 2

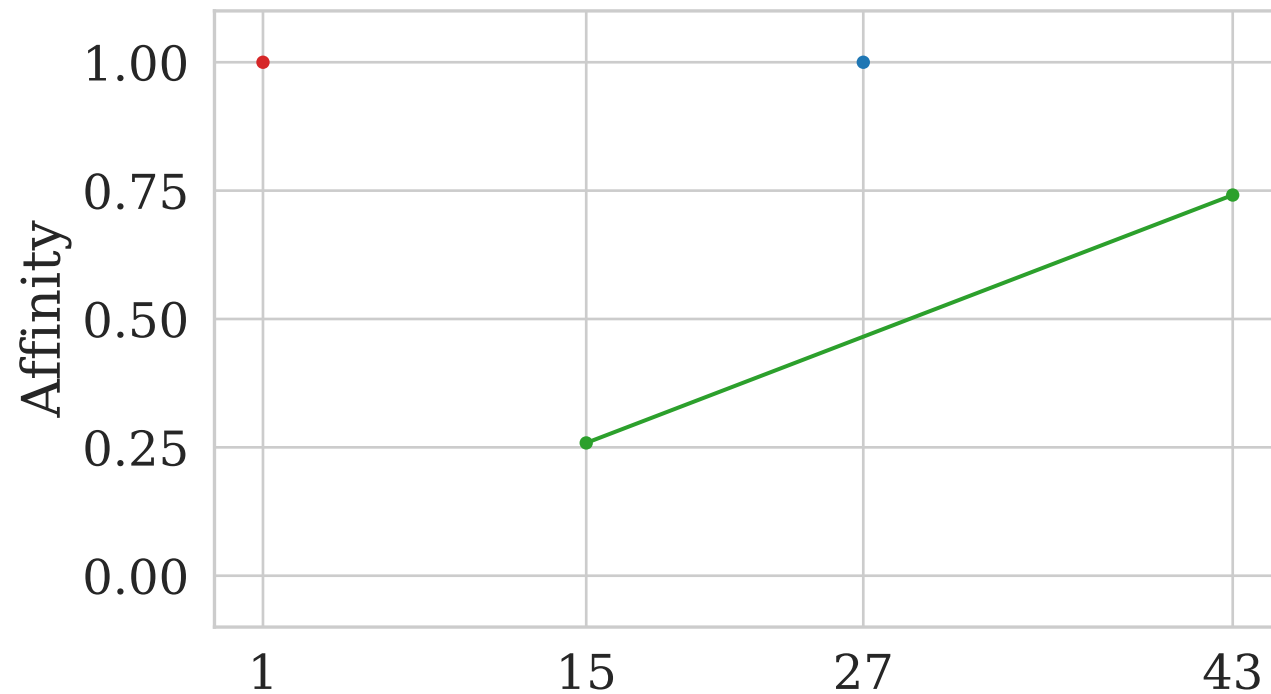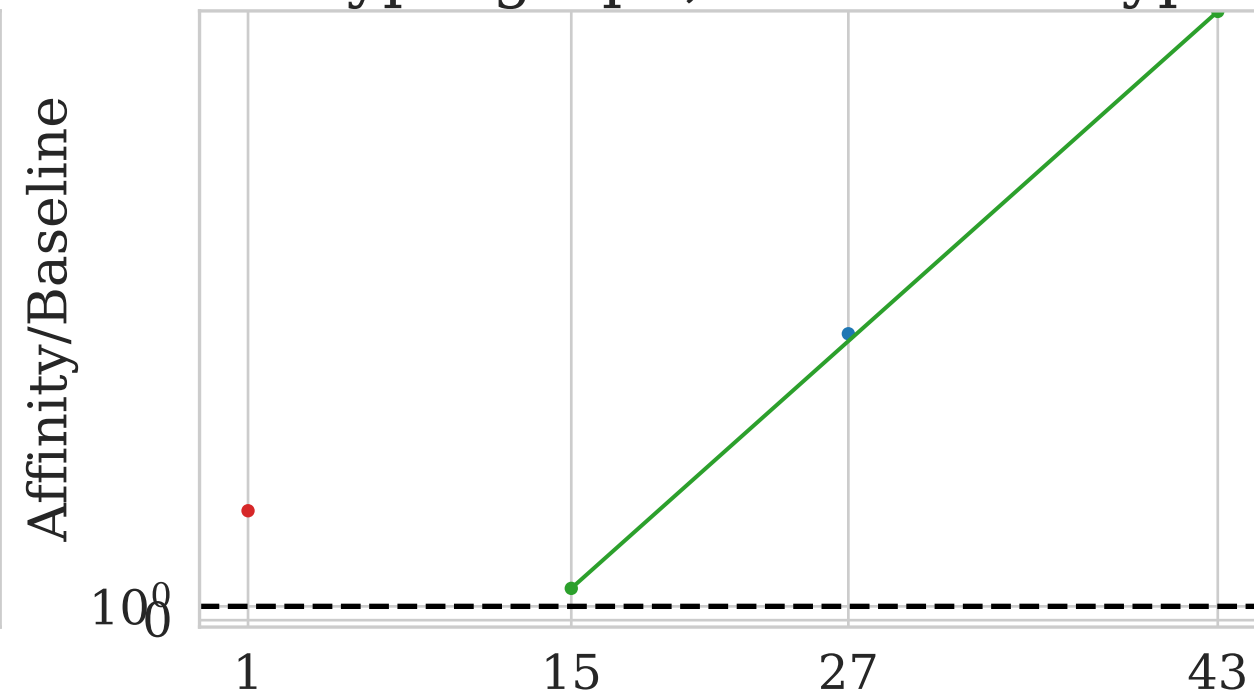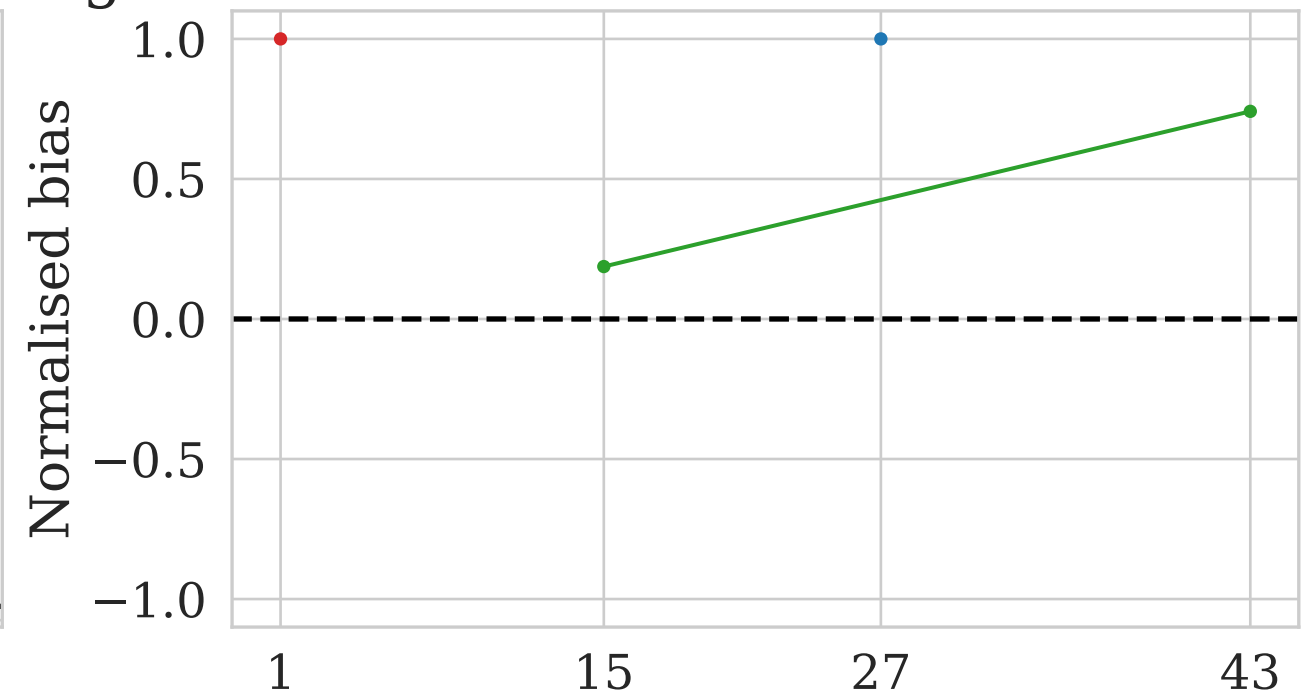

—●— Class 0
 —●— Class 1
 —●— Class 2
 —●— Class 3
 —●— Class 4
 —●— Class 5

51-uniform hypergraph, number of hyperedges: 2

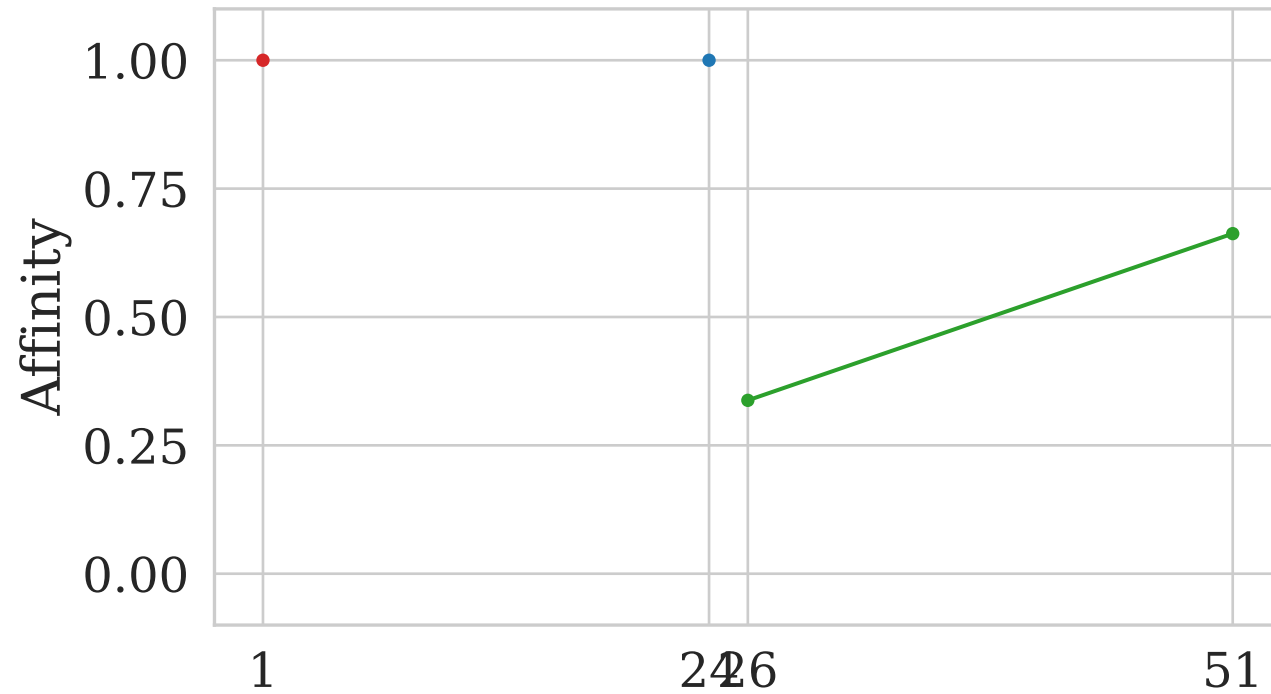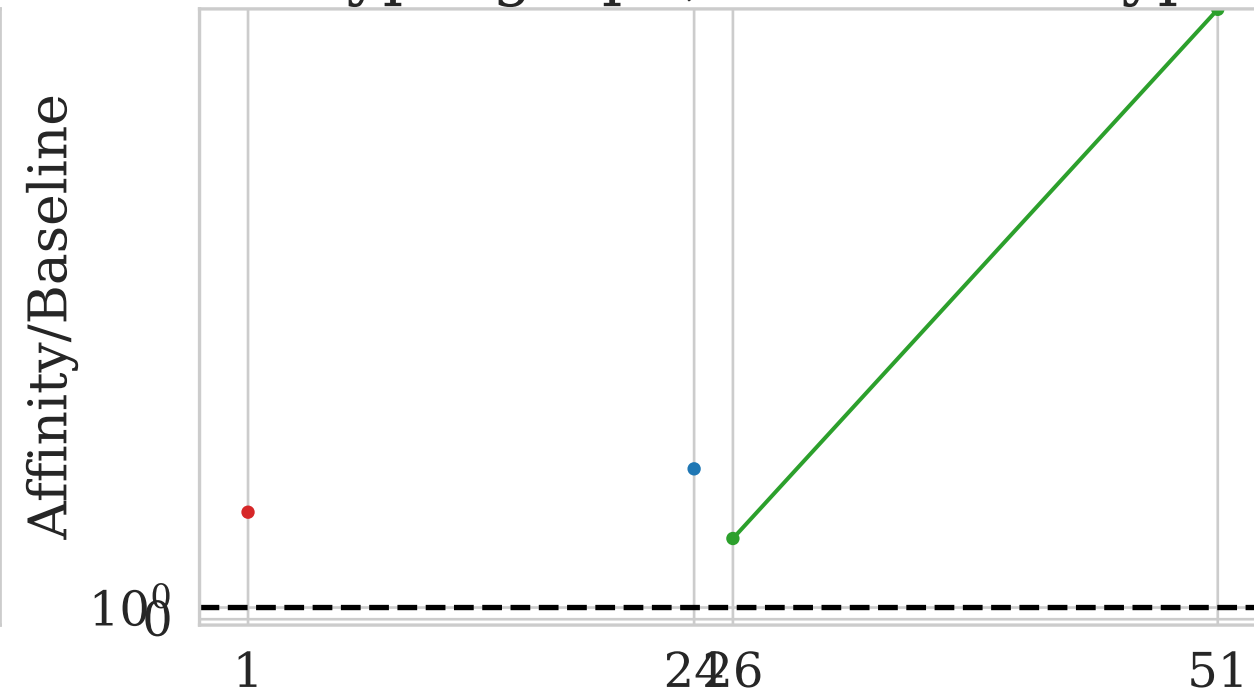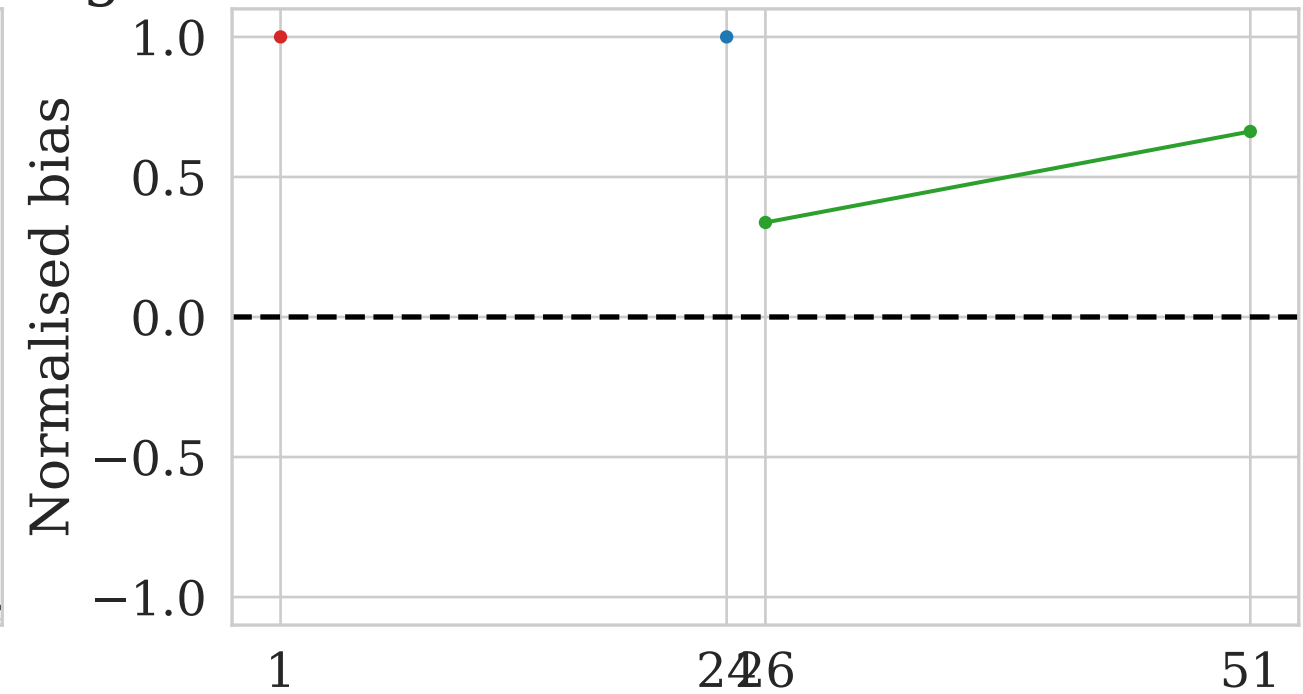

Class 0 Class 1 Class 2 Class 3 Class 4 Class 5

142-uniform hypergraph, number of hyperedges: 1

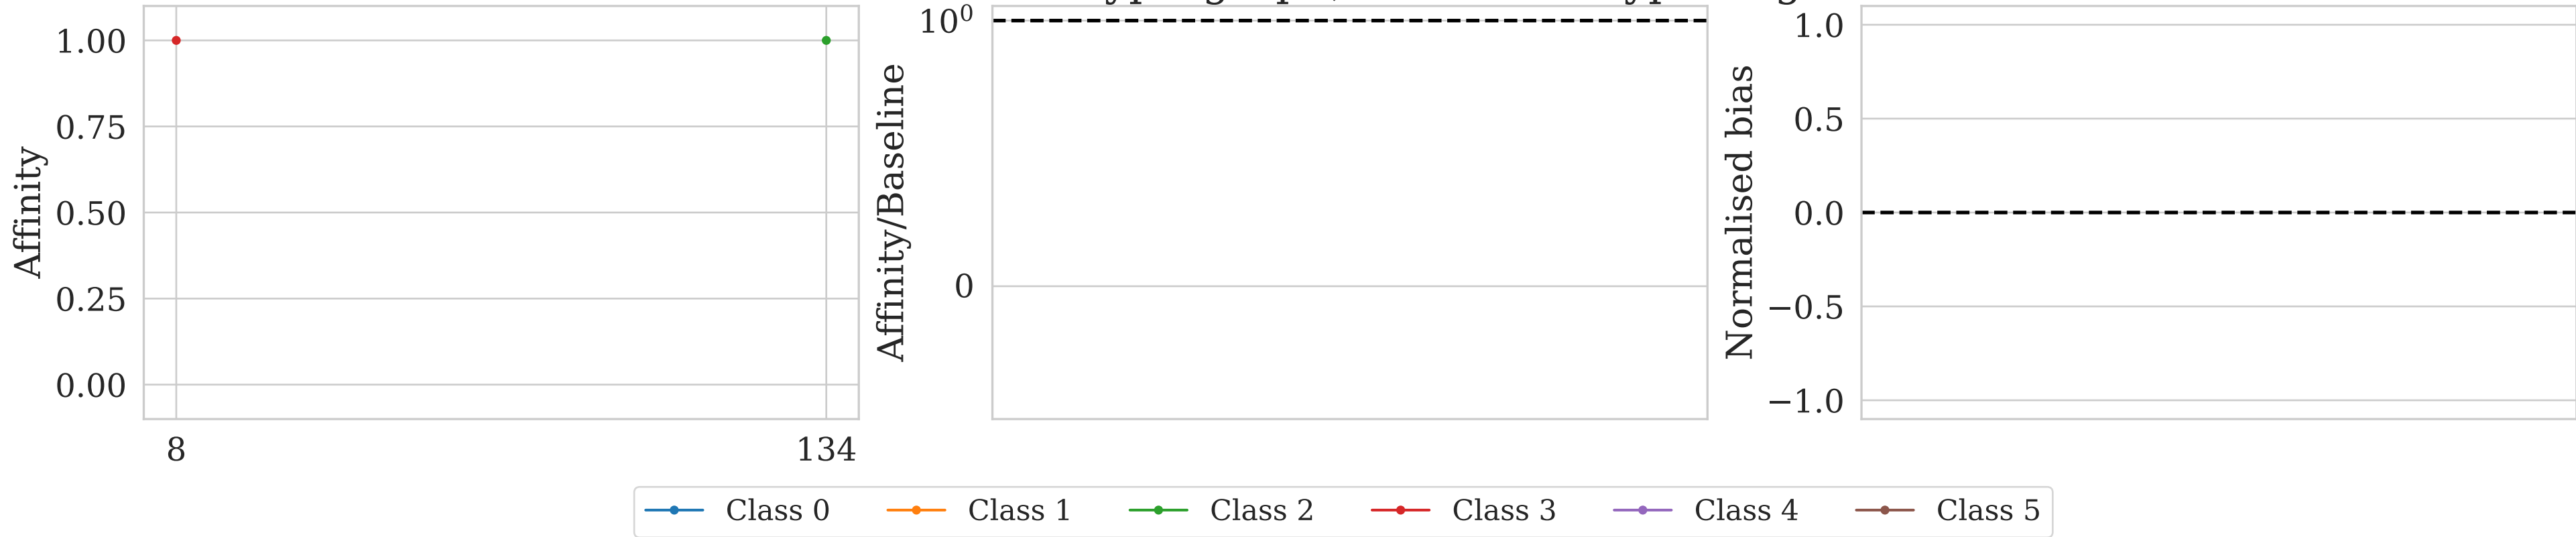

81-uniform hypergraph, number of hyperedges: 1

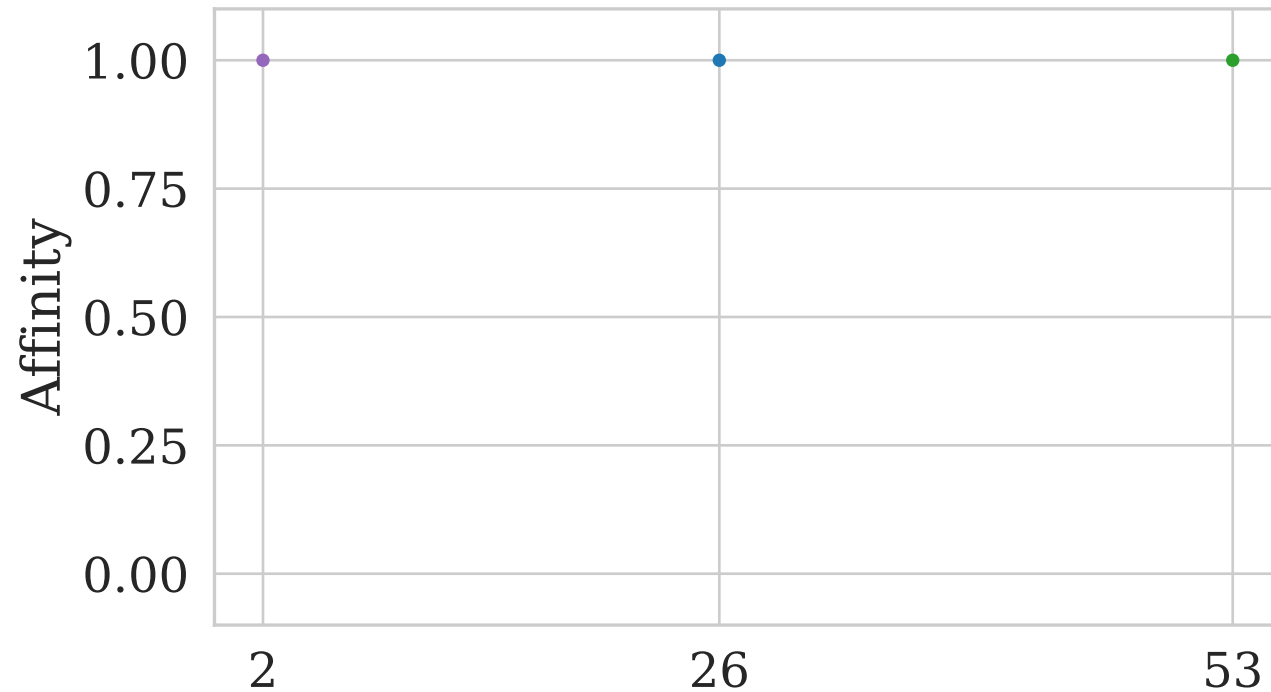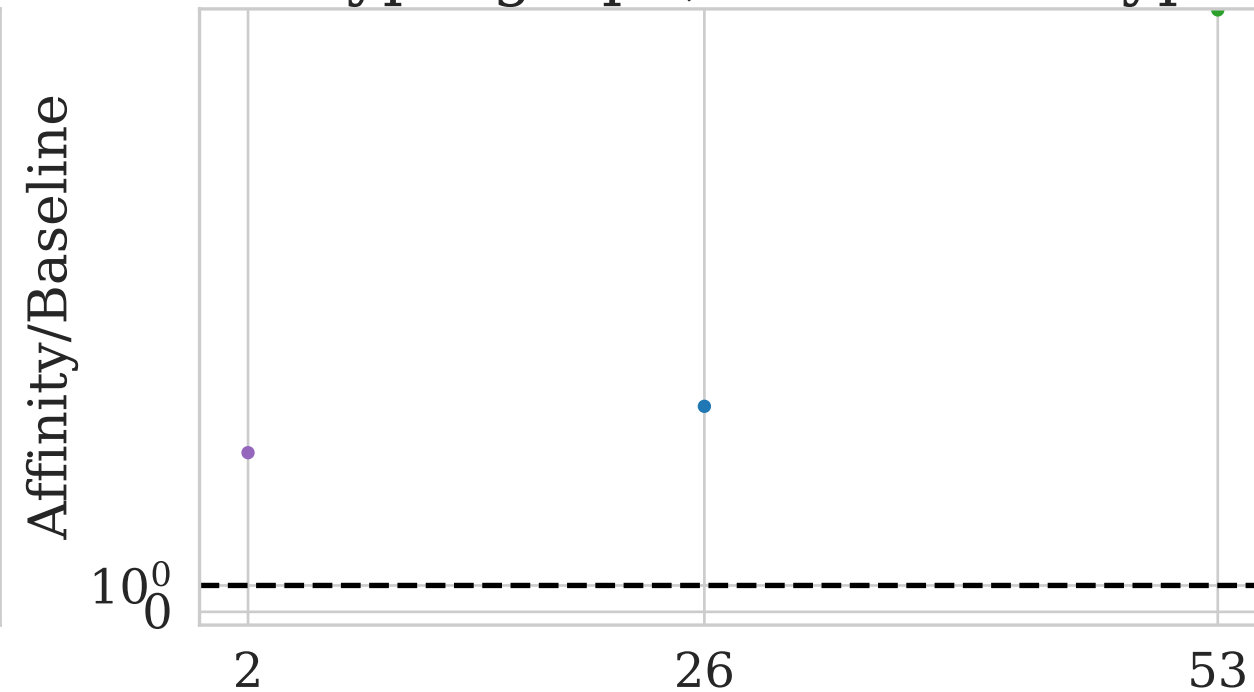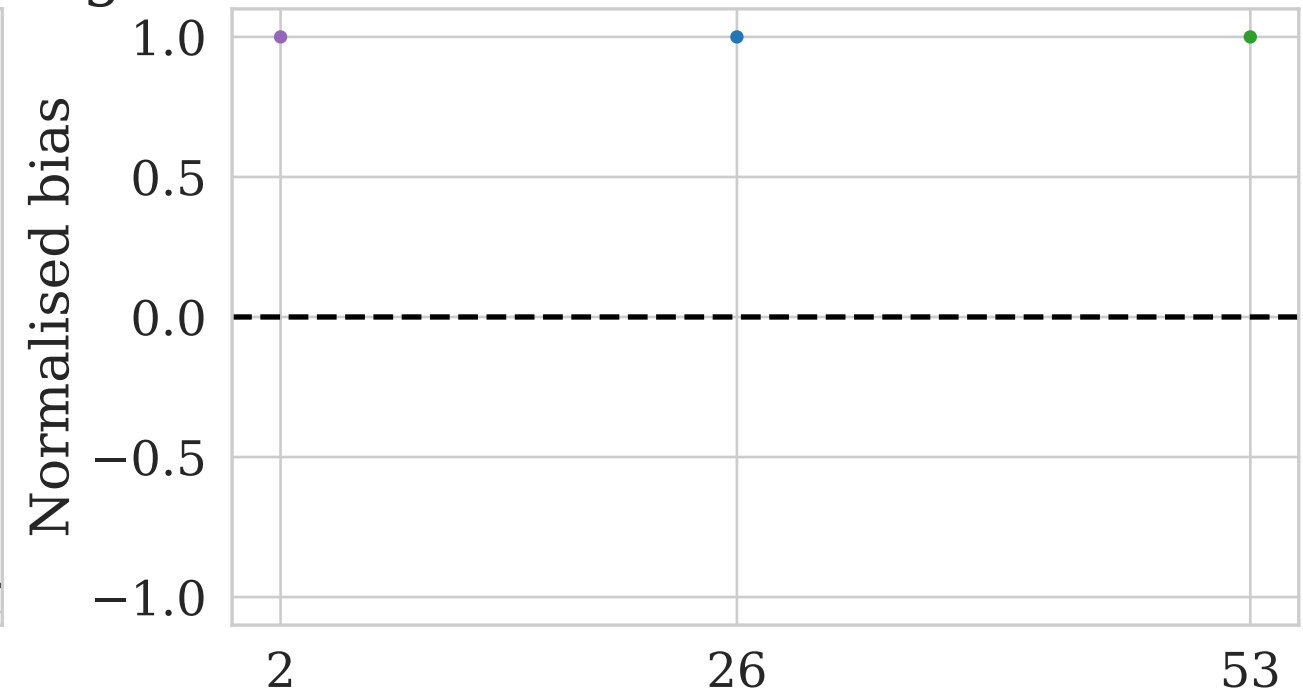

—●— Class 0  
 —●— Class 1  
 —●— Class 2  
 —●— Class 3  
 —●— Class 4  
 —●— Class 5

139-uniform hypergraph, number of hyperedges: 1

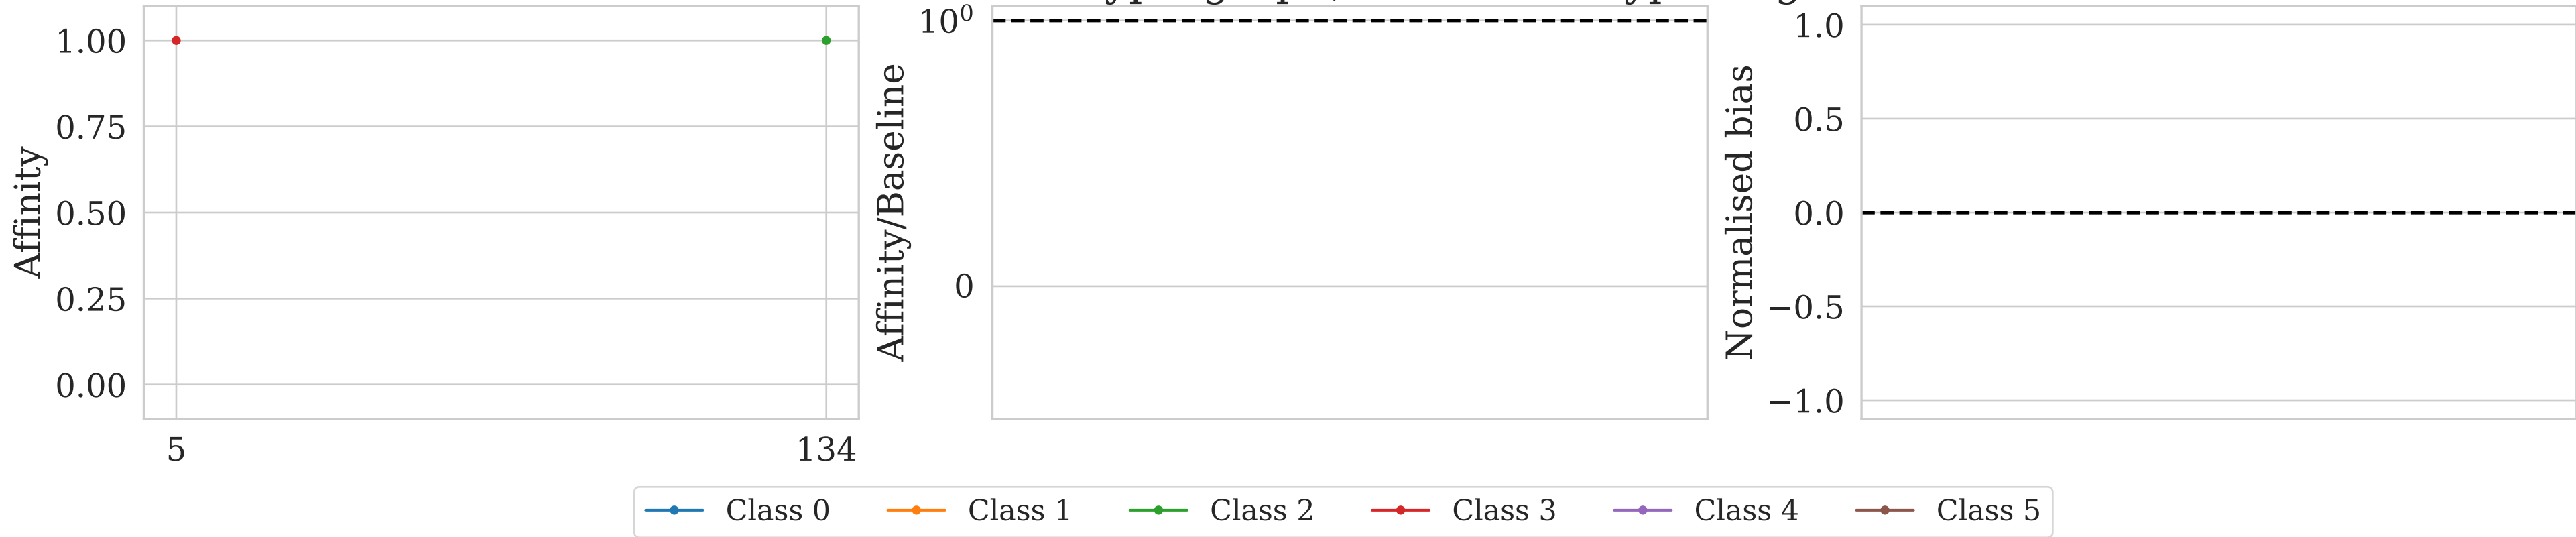



105-uniform hypergraph, number of hyperedges: 1

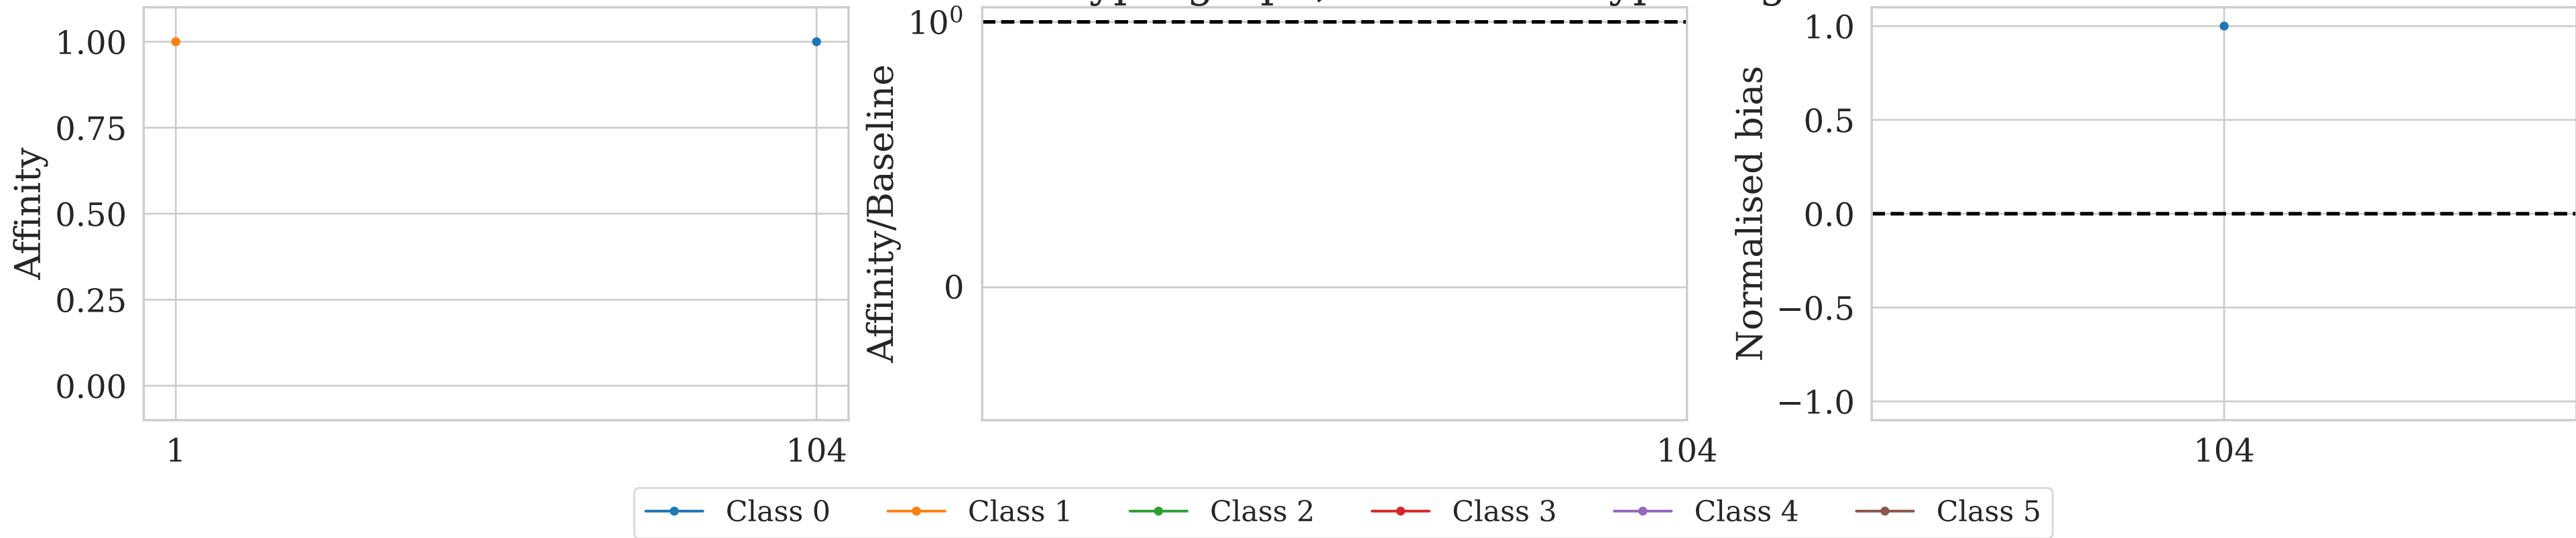

95-uniform hypergraph, number of hyperedges: 1

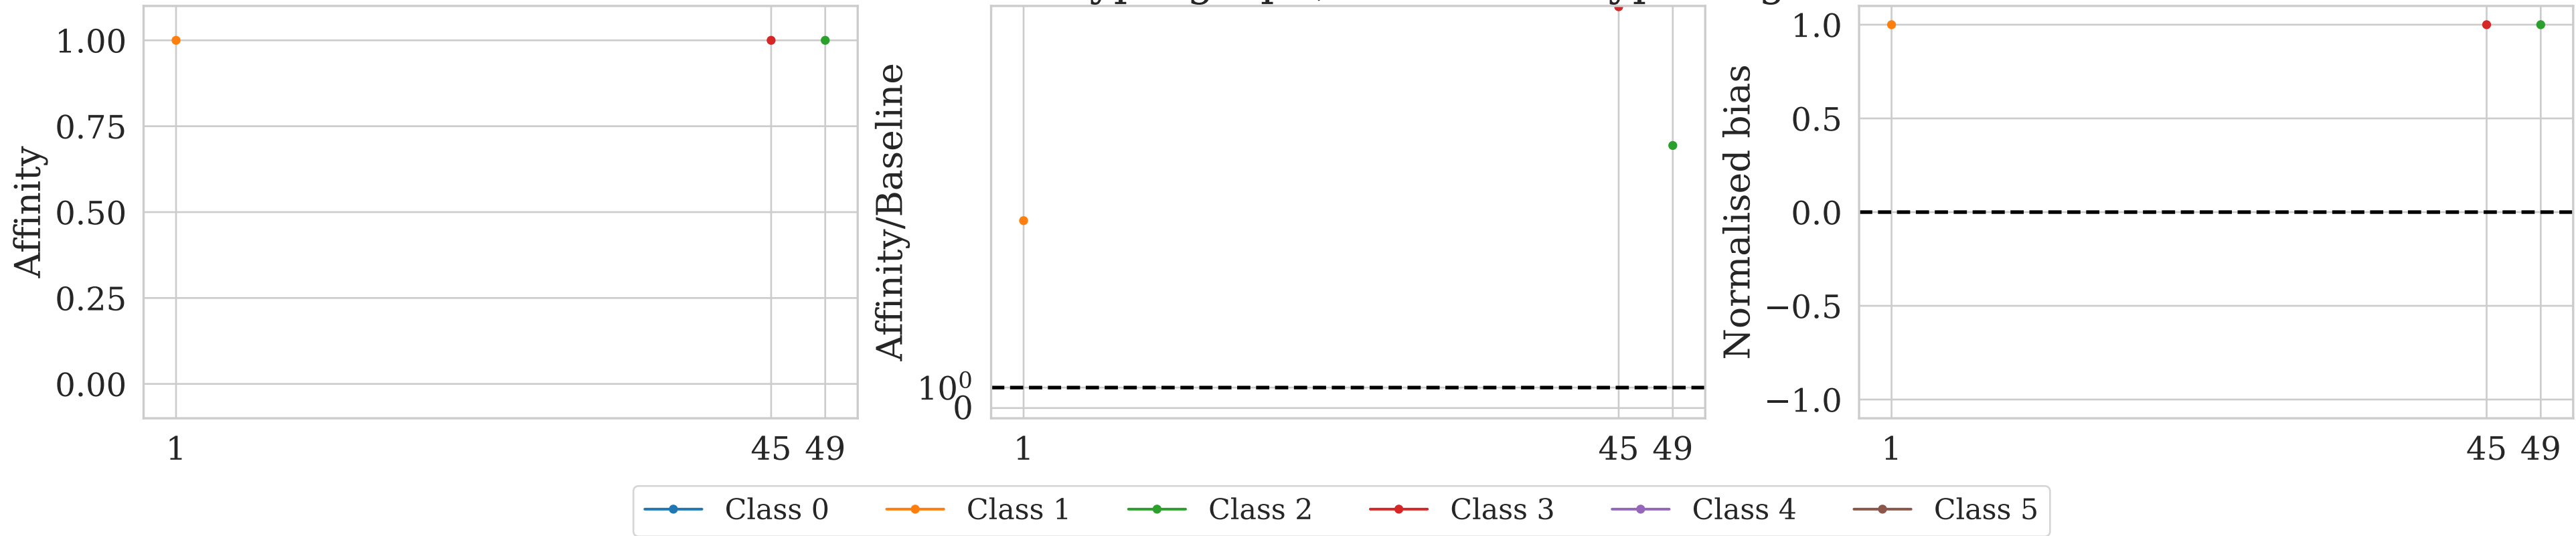

91-uniform hypergraph, number of hyperedges: 1

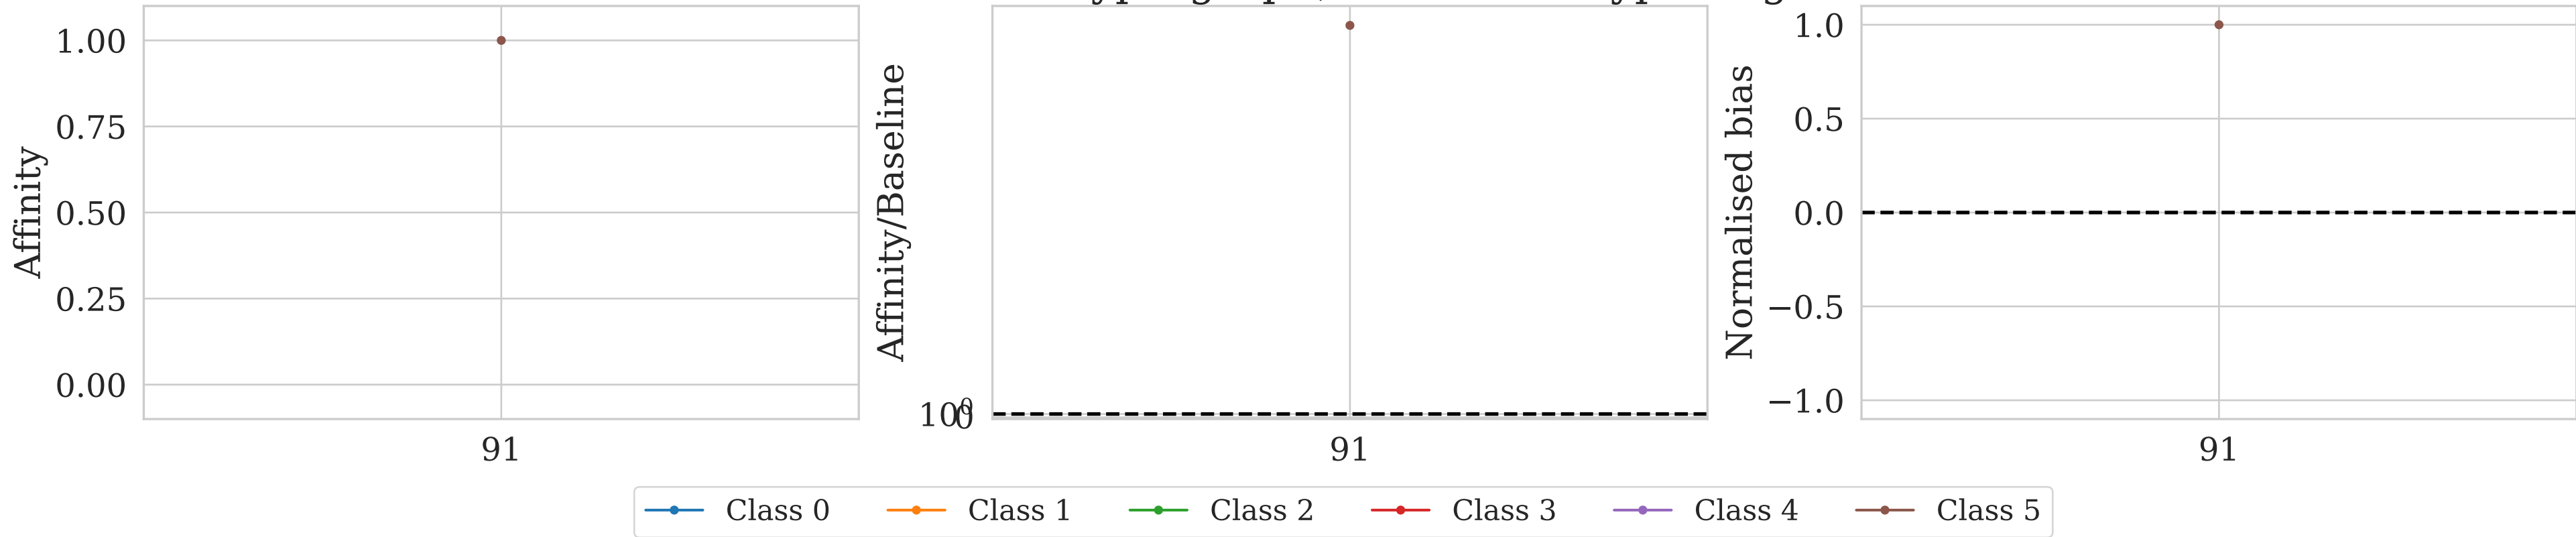

85-uniform hypergraph, number of hyperedges: 1

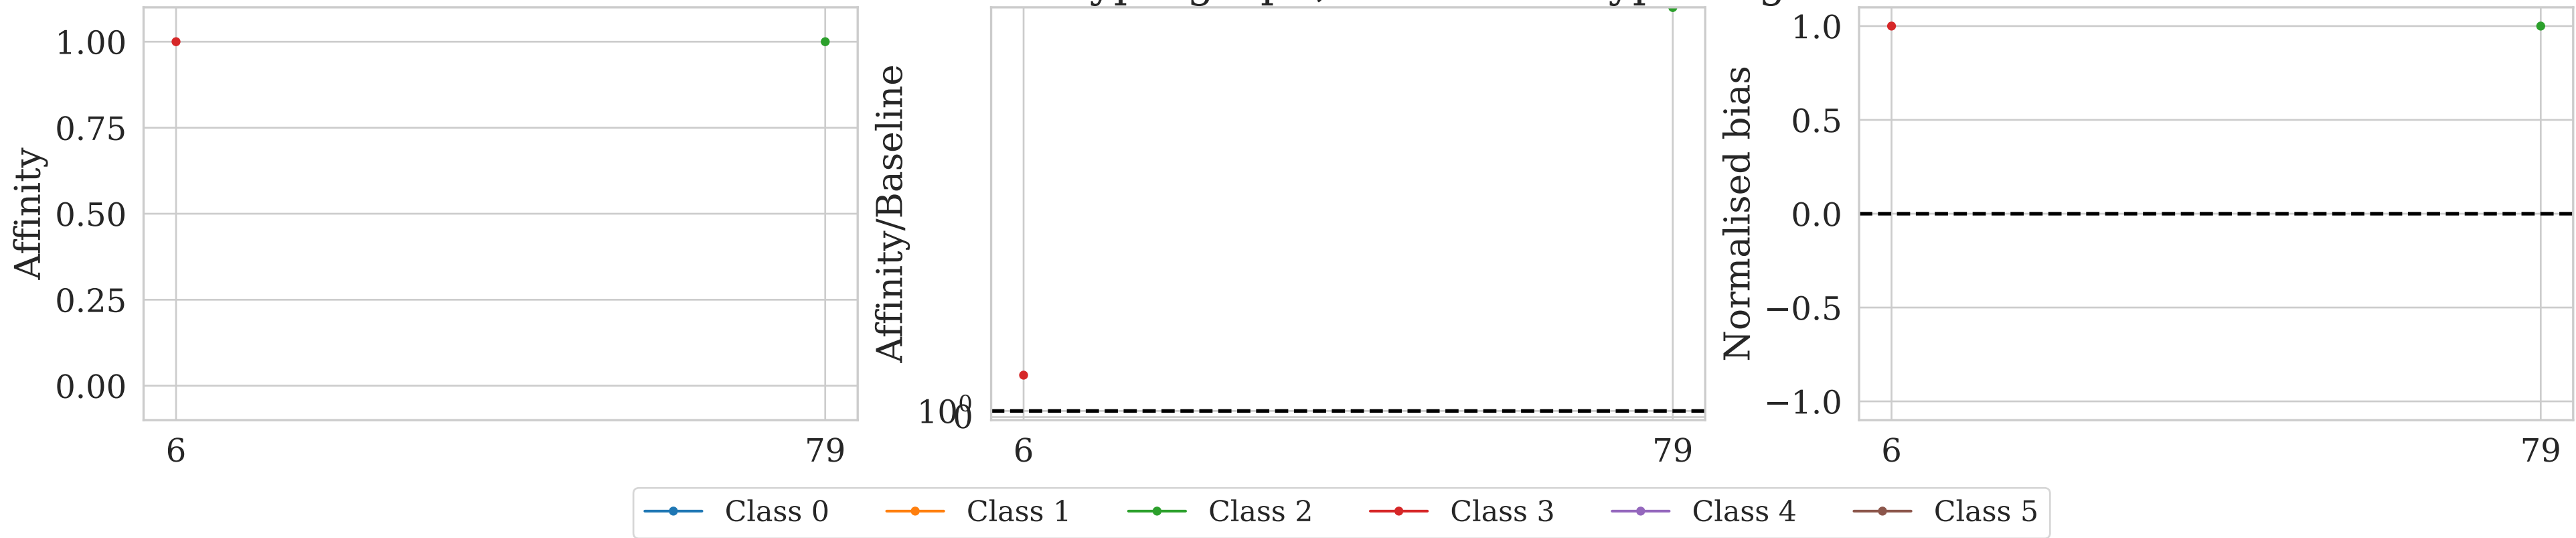

84-uniform hypergraph, number of hyperedges: 1

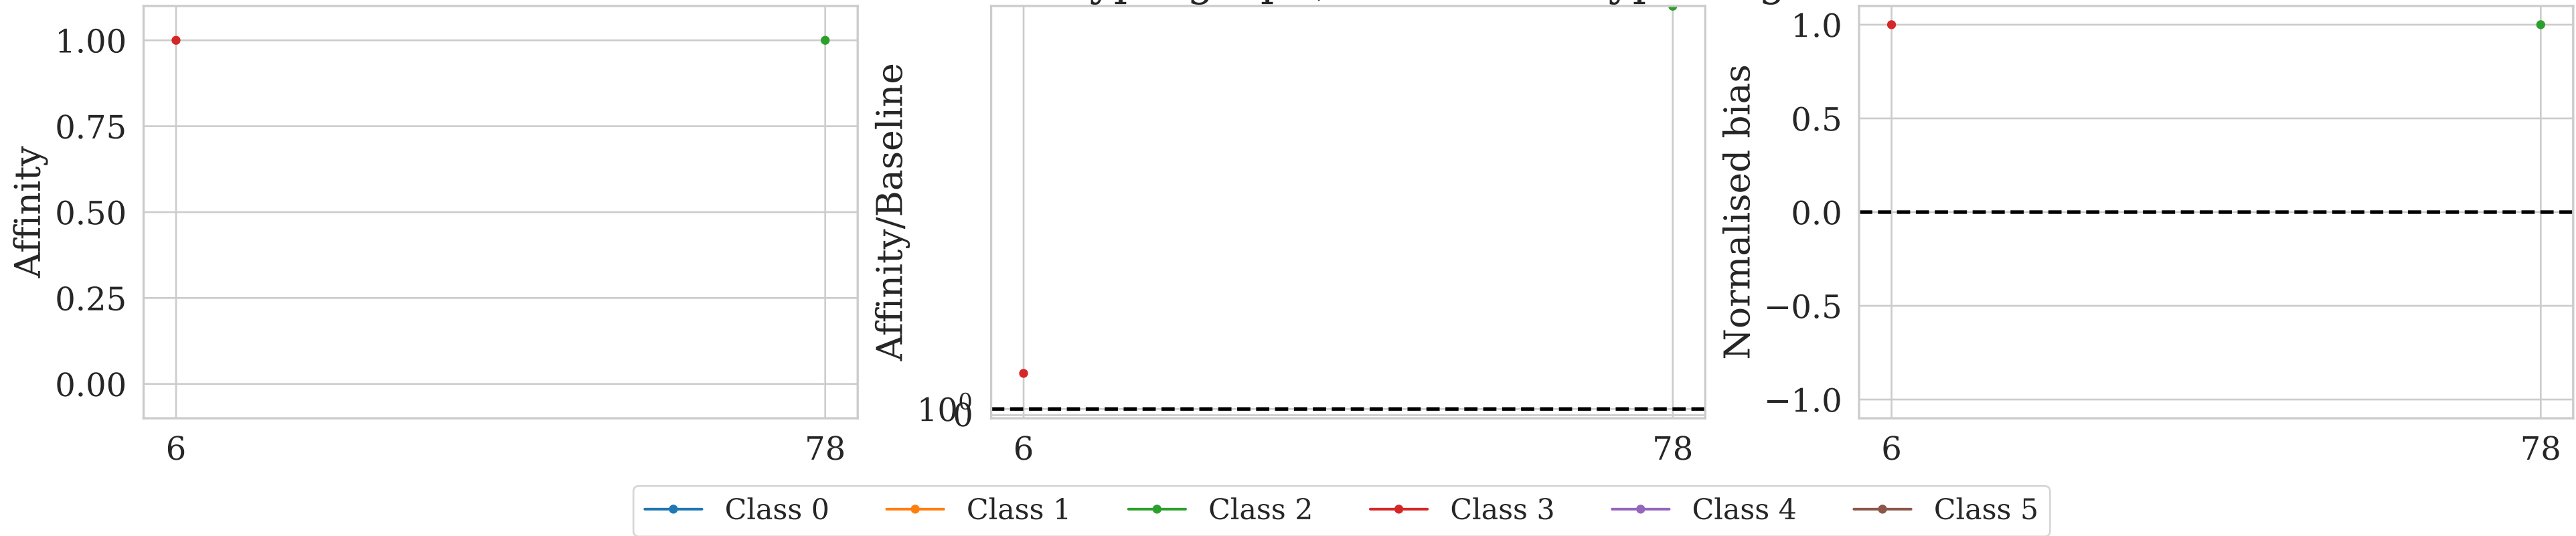

83-uniform hypergraph, number of hyperedges: 1

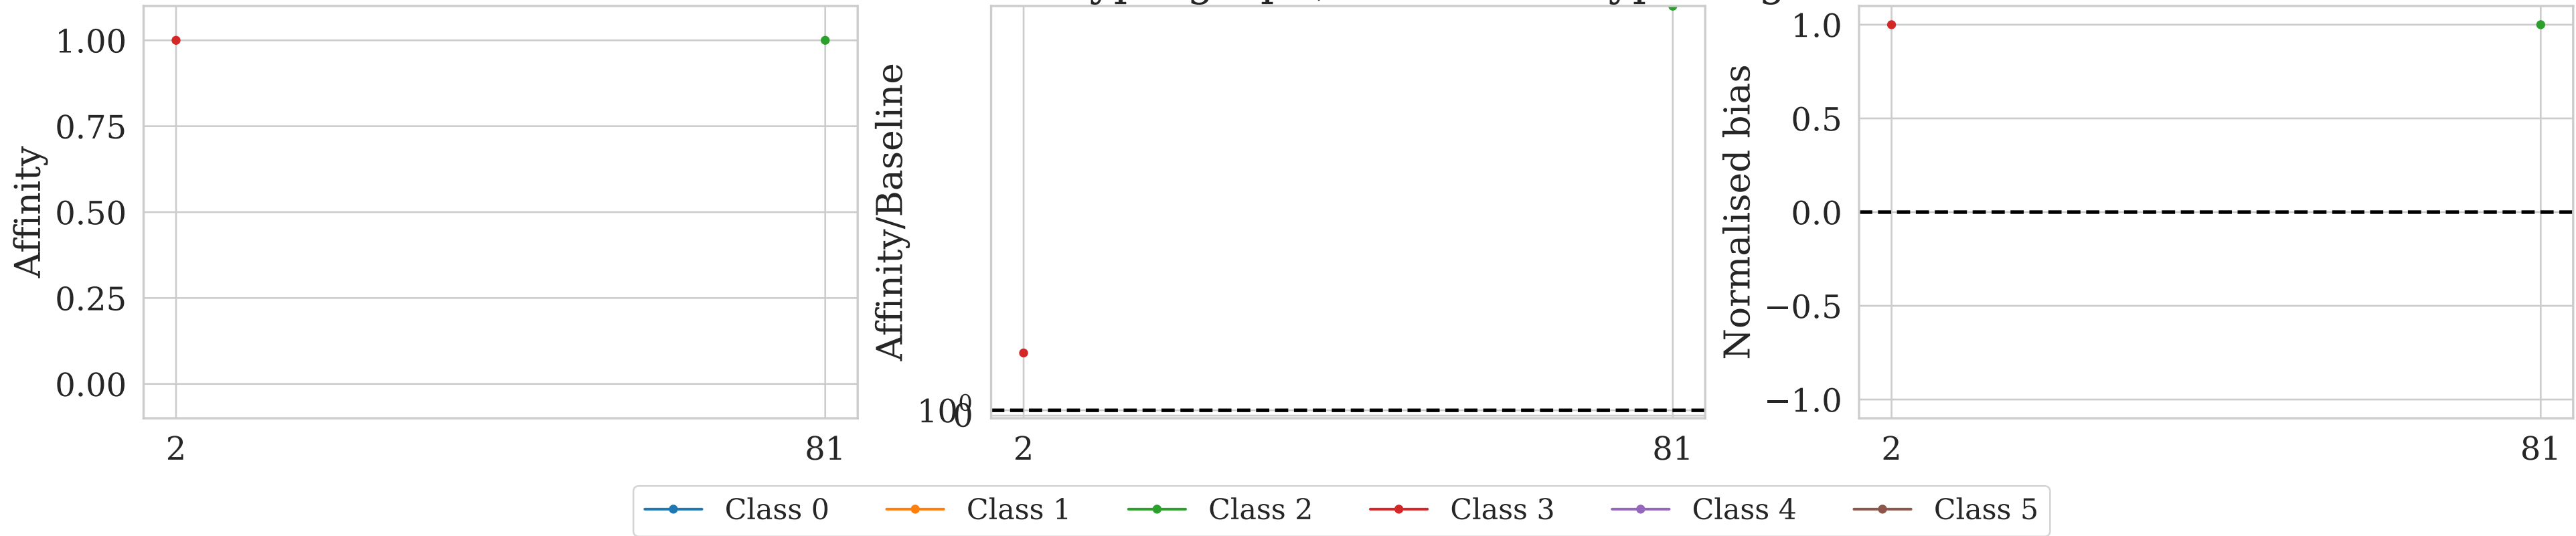

48-uniform hypergraph, number of hyperedges: 1

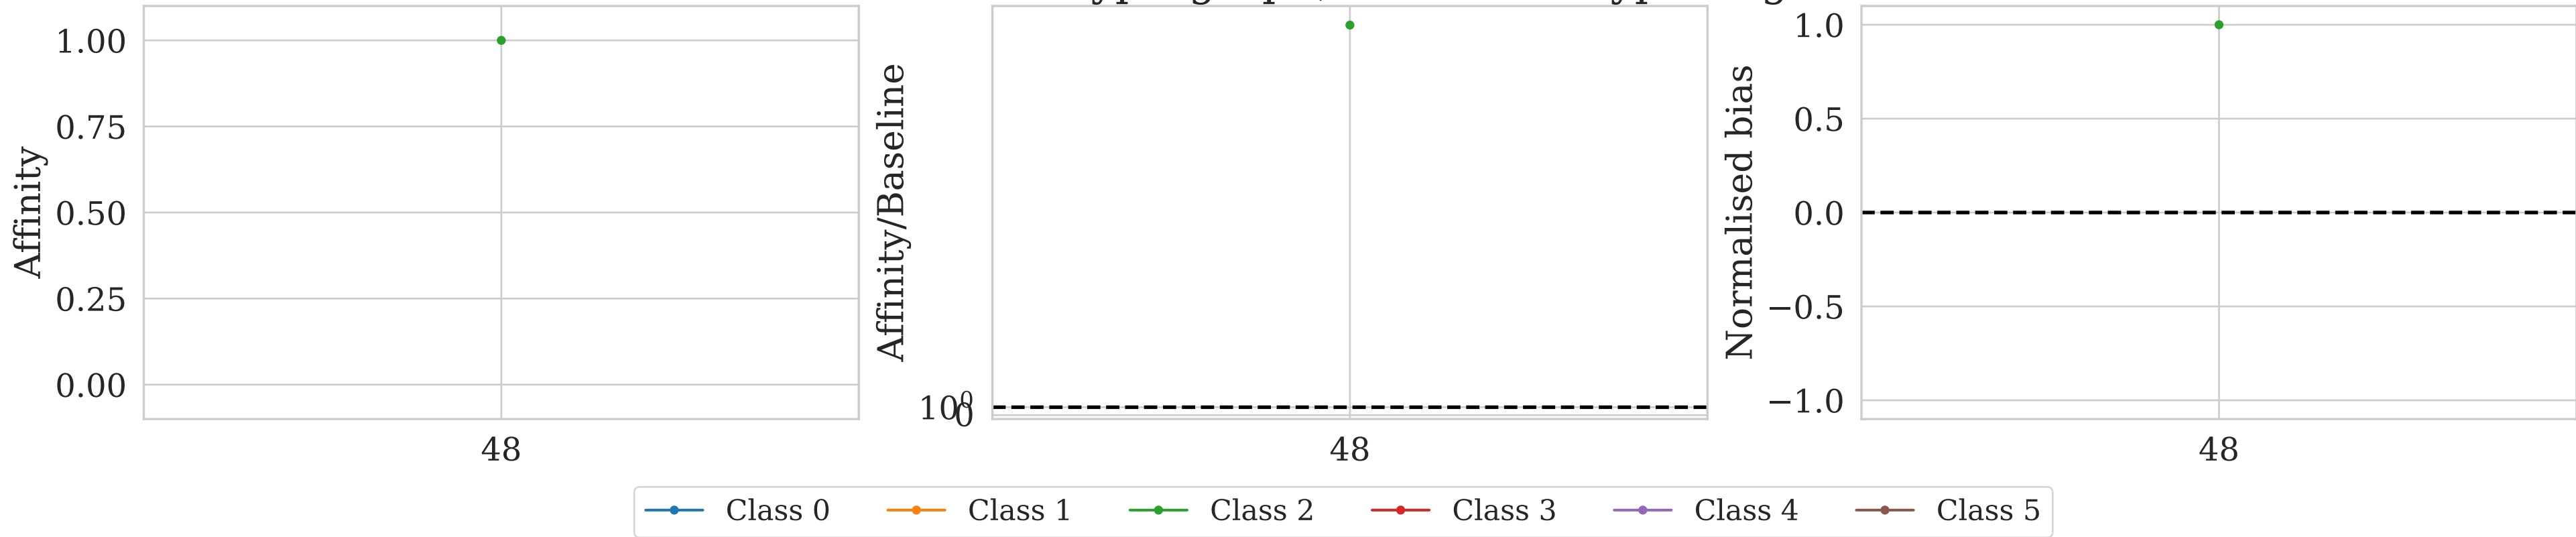

53-uniform hypergraph, number of hyperedges: 1

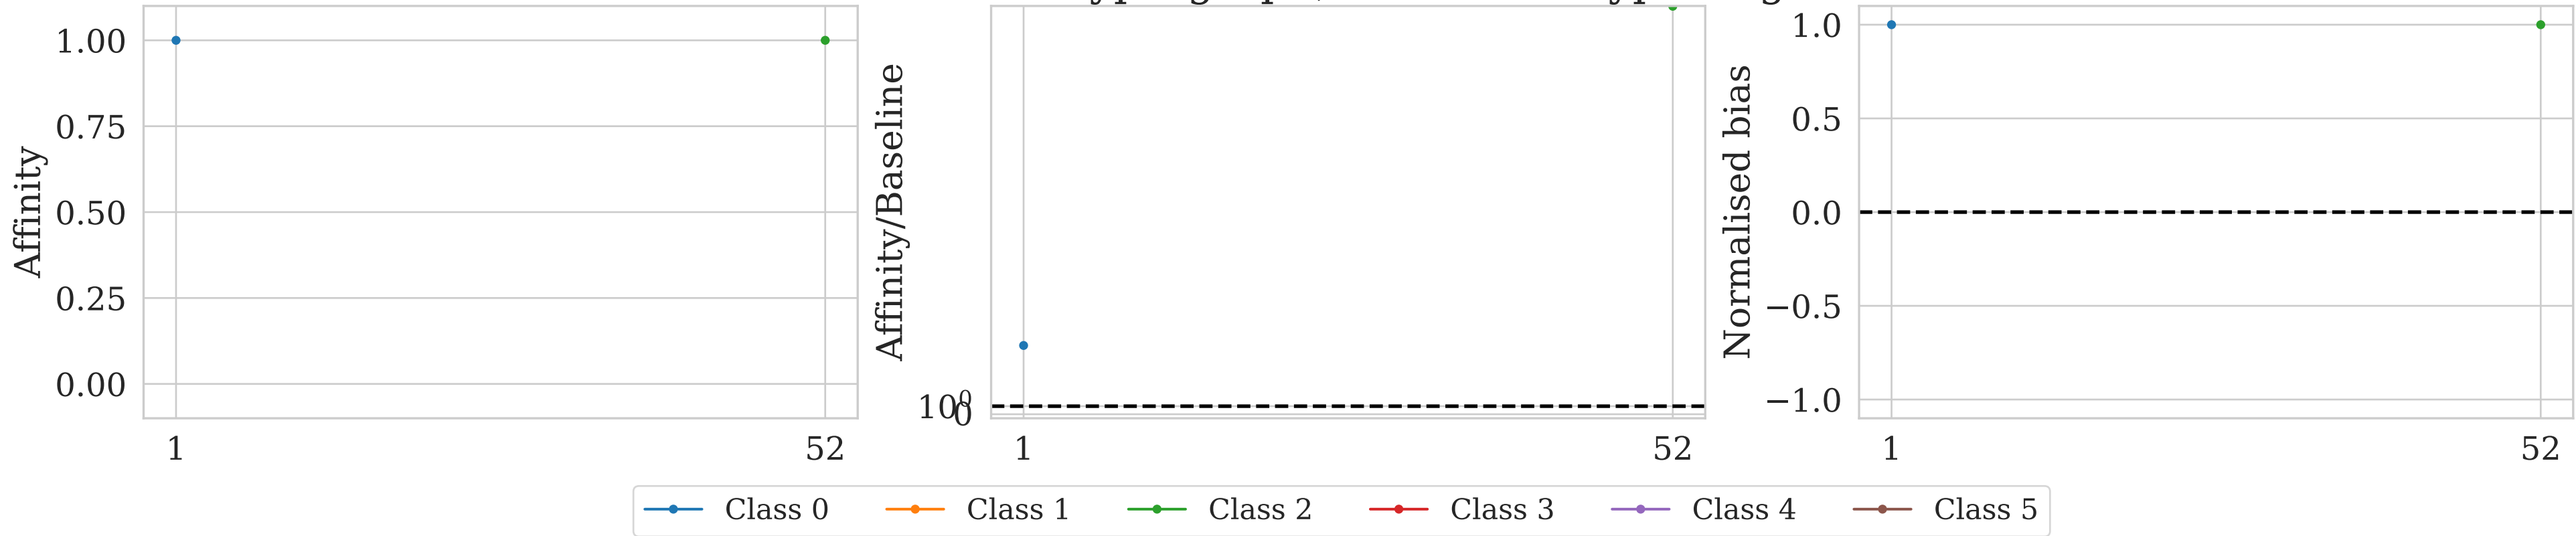



67-uniform hypergraph, number of hyperedges: 1

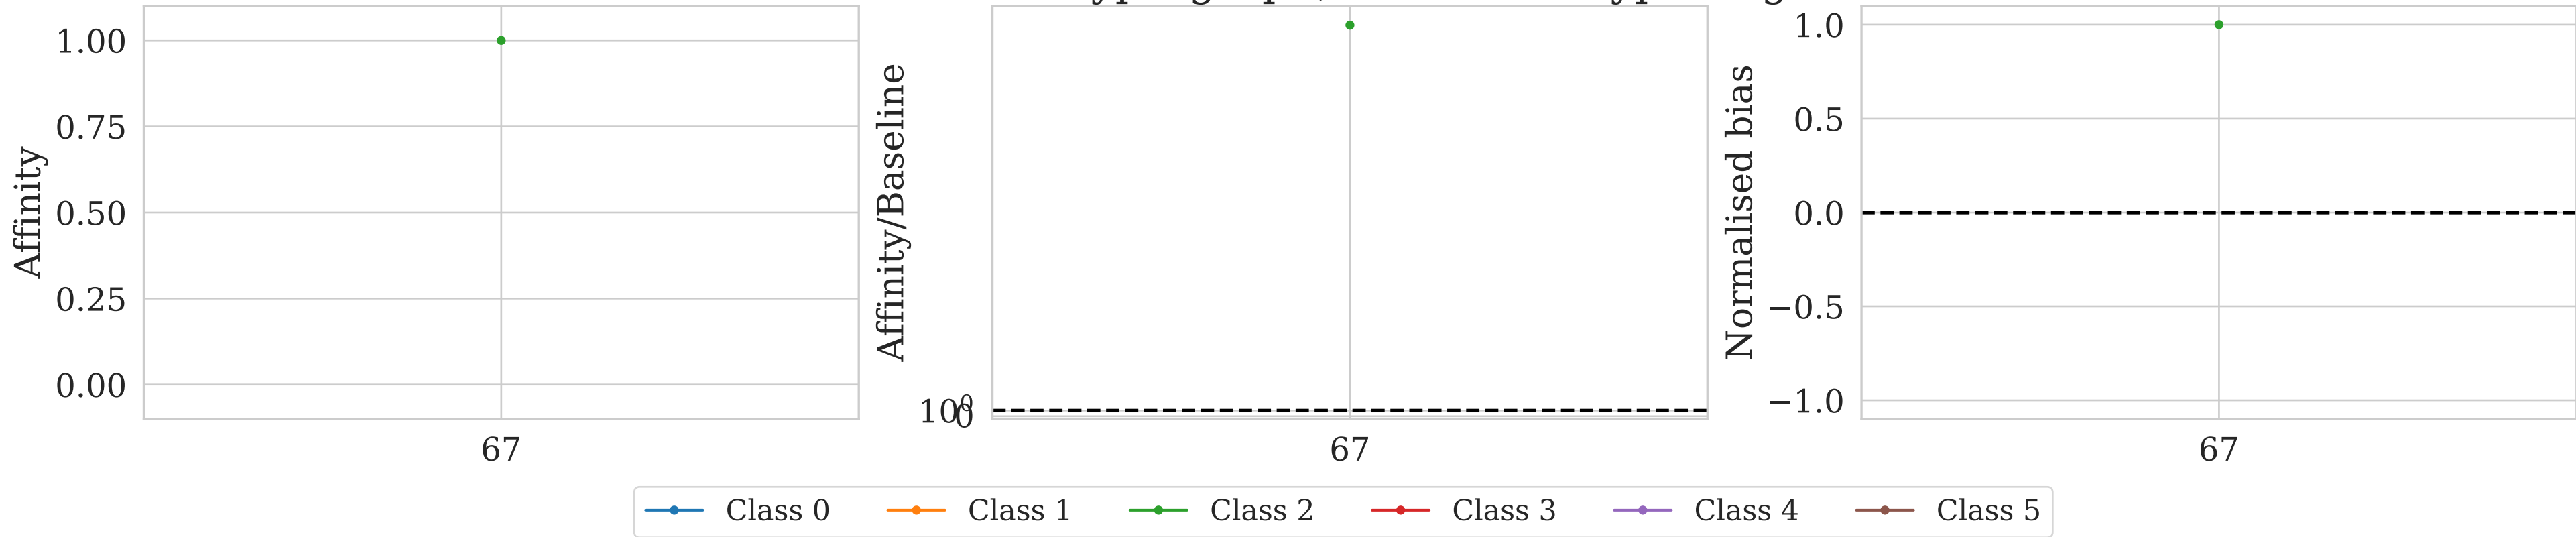

49-uniform hypergraph, number of hyperedges: 1

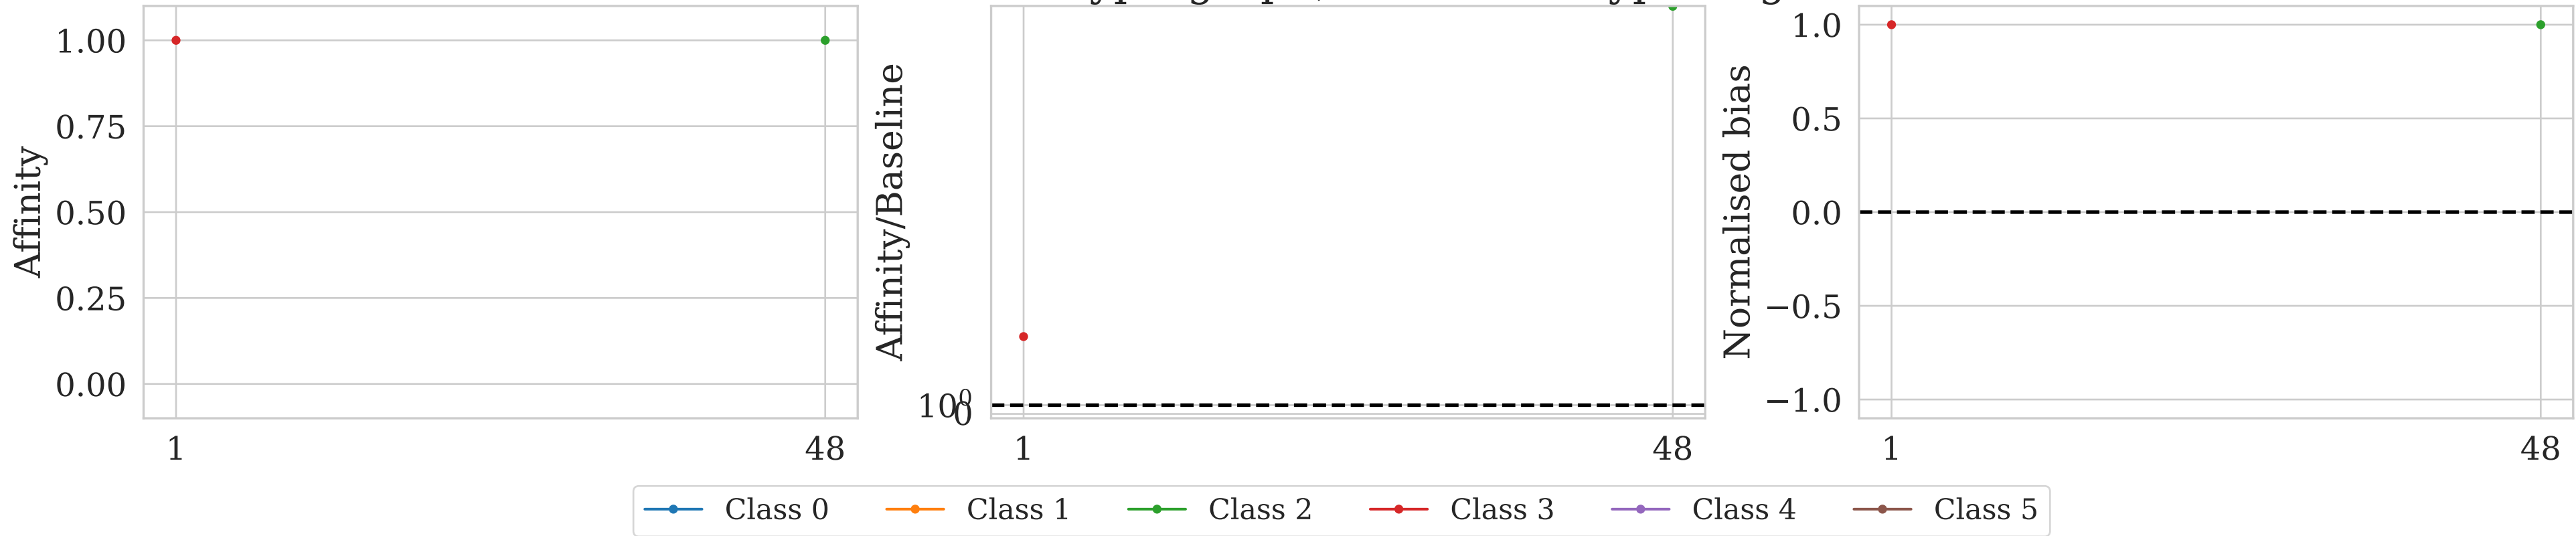

64-uniform hypergraph, number of hyperedges: 1

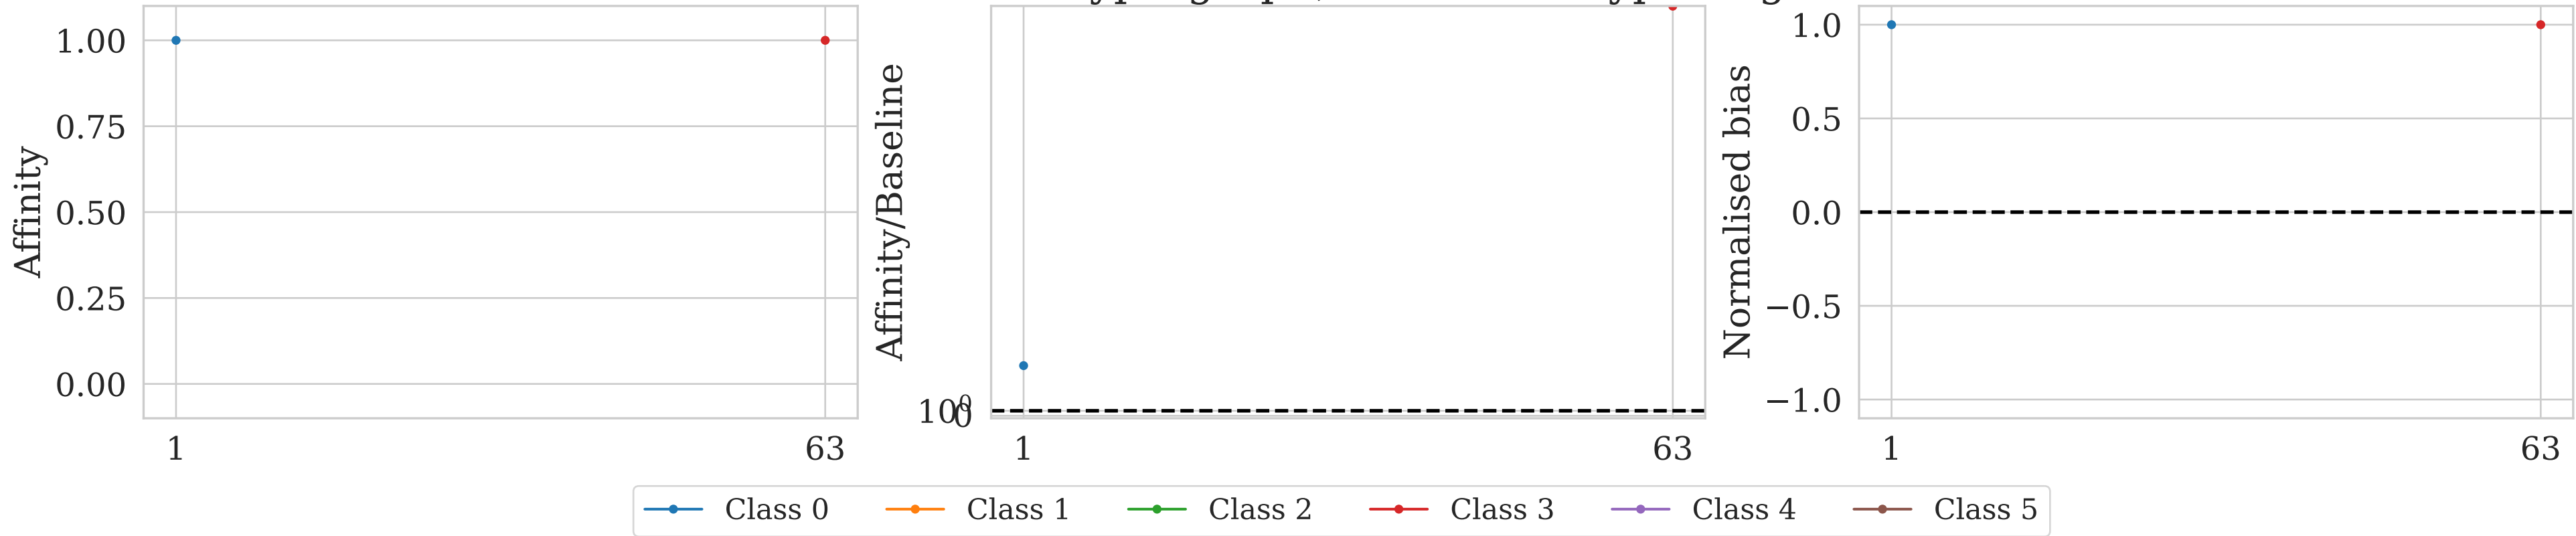

62-uniform hypergraph, number of hyperedges: 1

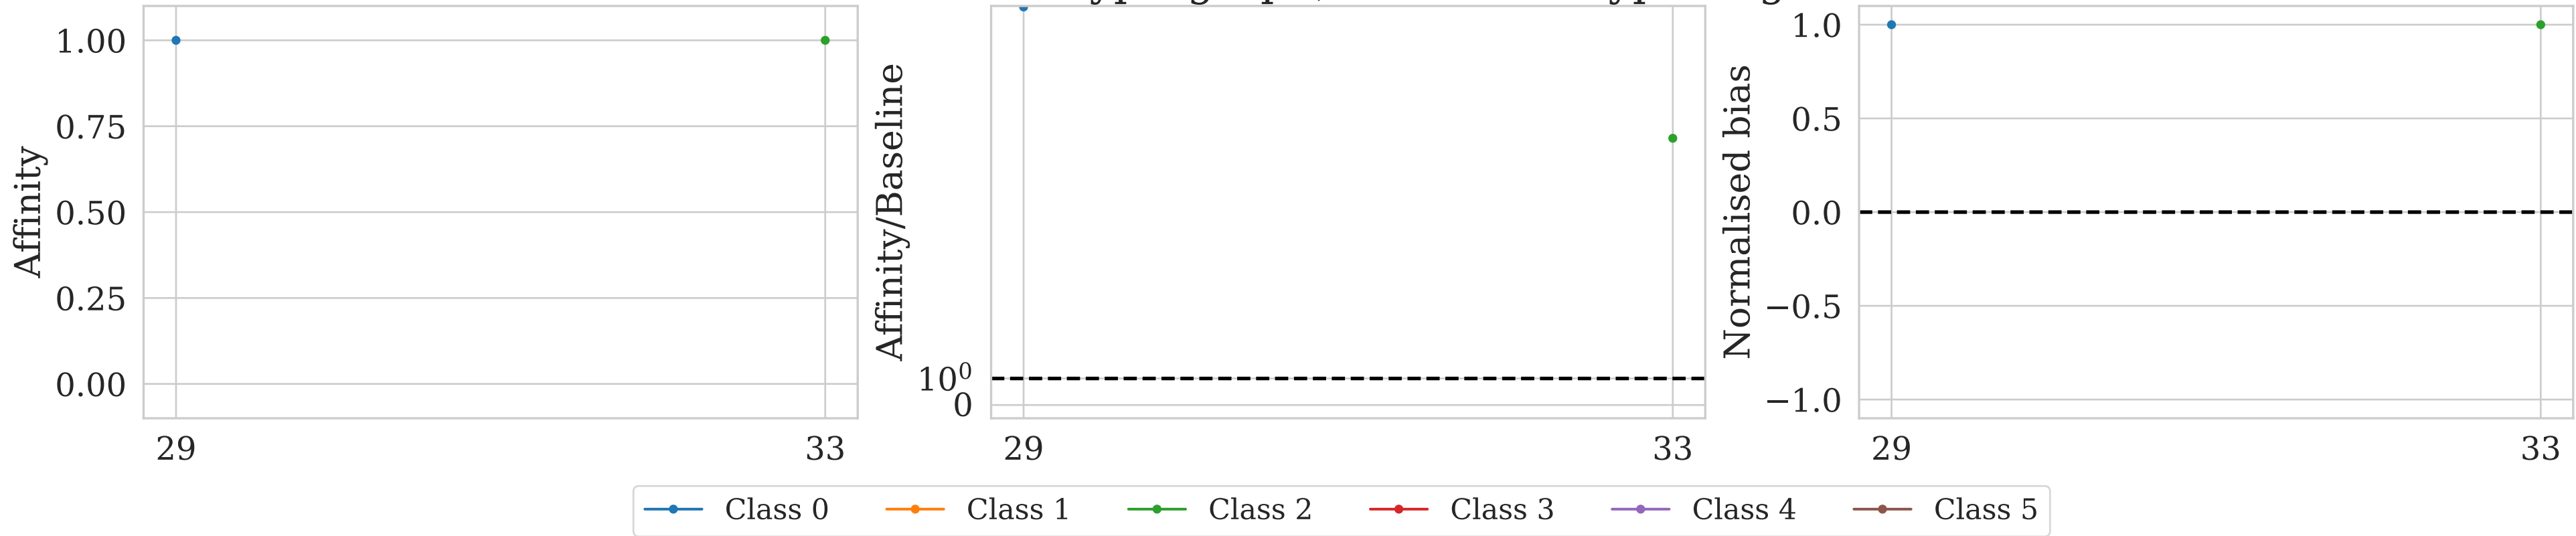

50-uniform hypergraph, number of hyperedges: 1

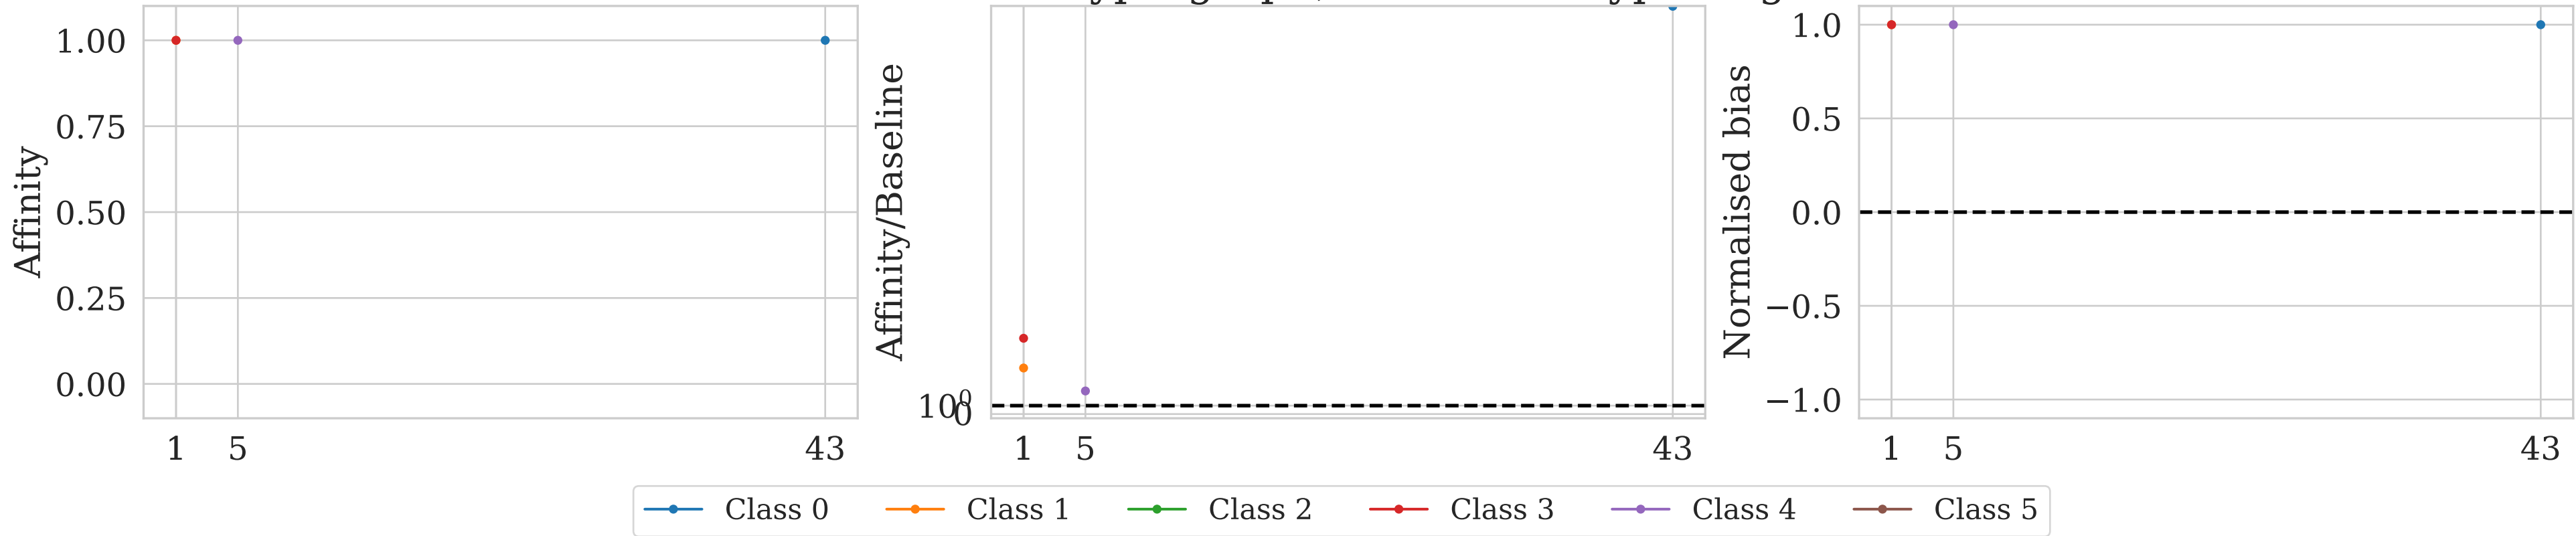

59-uniform hypergraph, number of hyperedges: 1

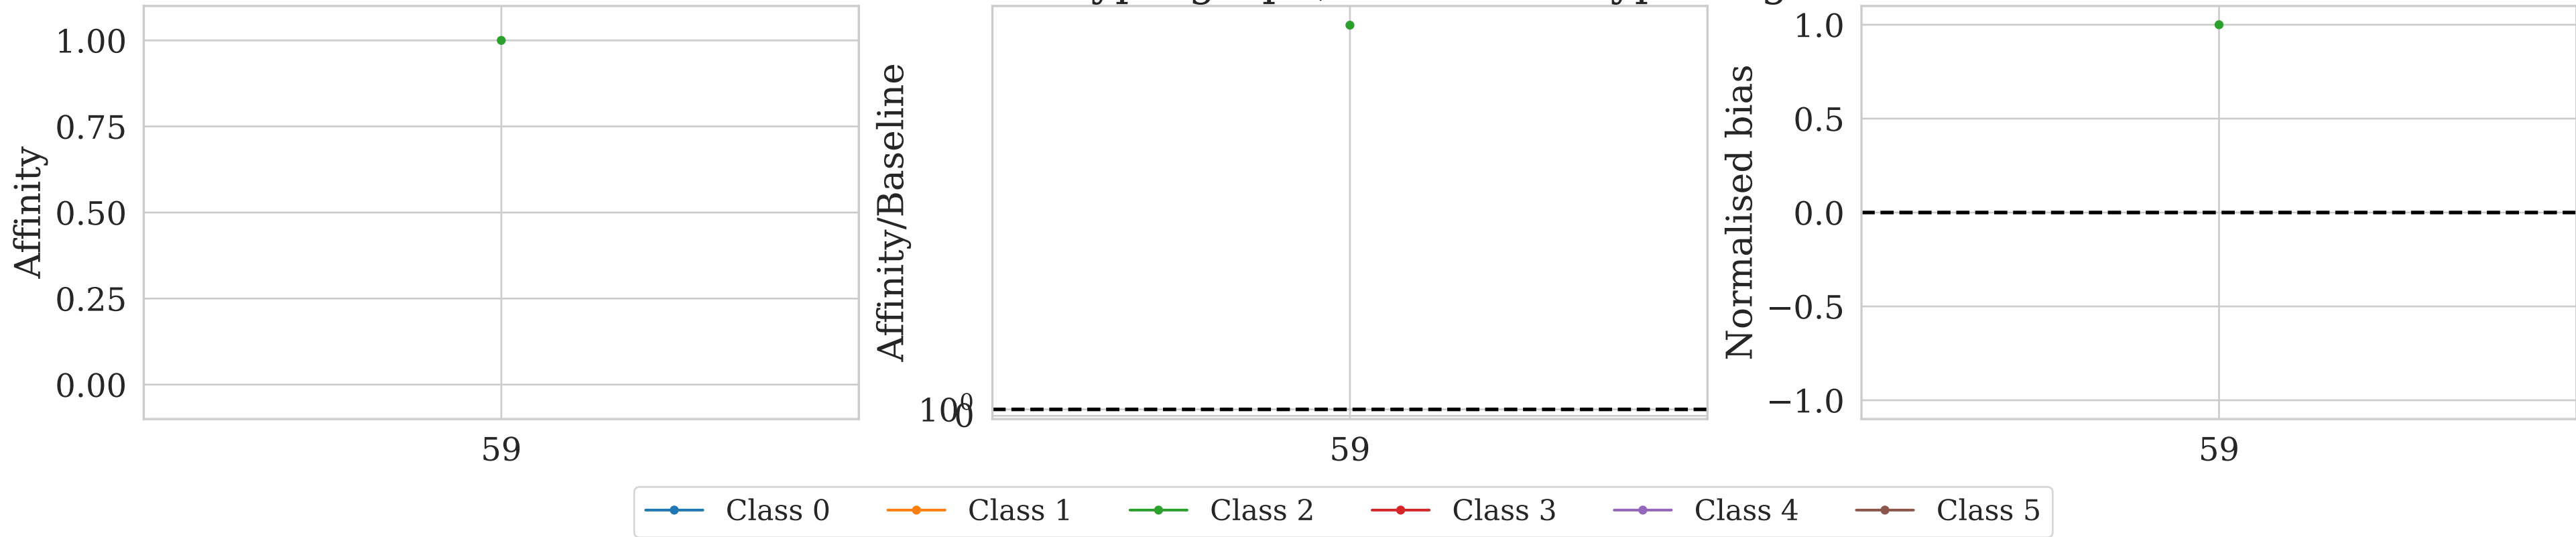

202-uniform hypergraph, number of hyperedges: 1

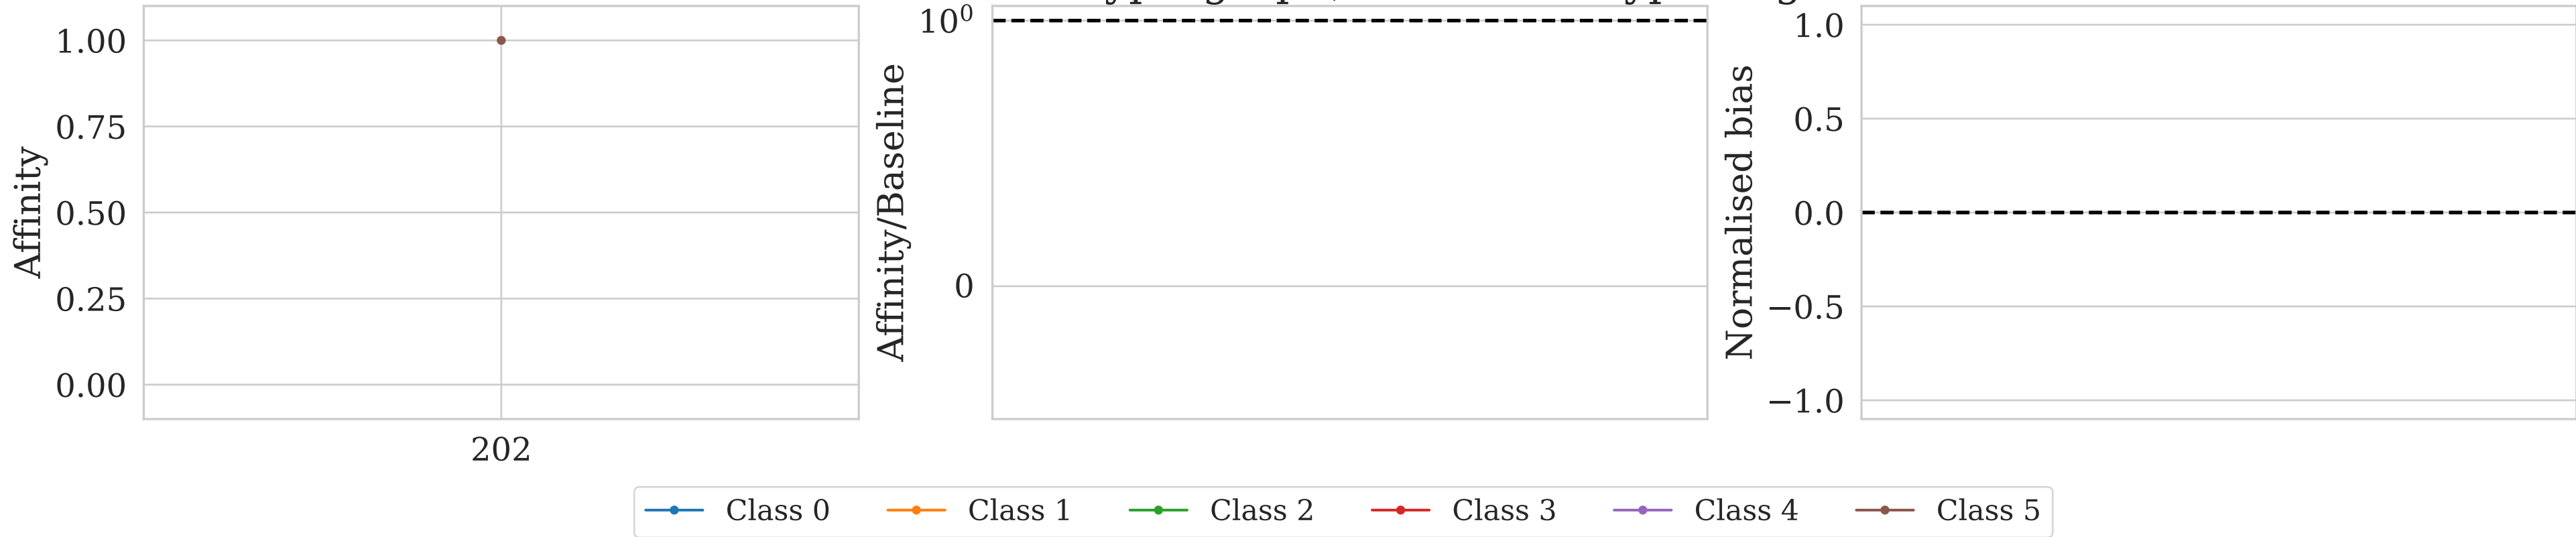

Supplement: supplementary_material [file attachment]
