# Supplementary material
Source: ML conference proceedings conference paper supplement (https://openreview.net/forum?id=YPpkFqMX6V)
Supplement: supplementary_material [file attachment]

192-uniform hypergraph, number of hyperedges: 26

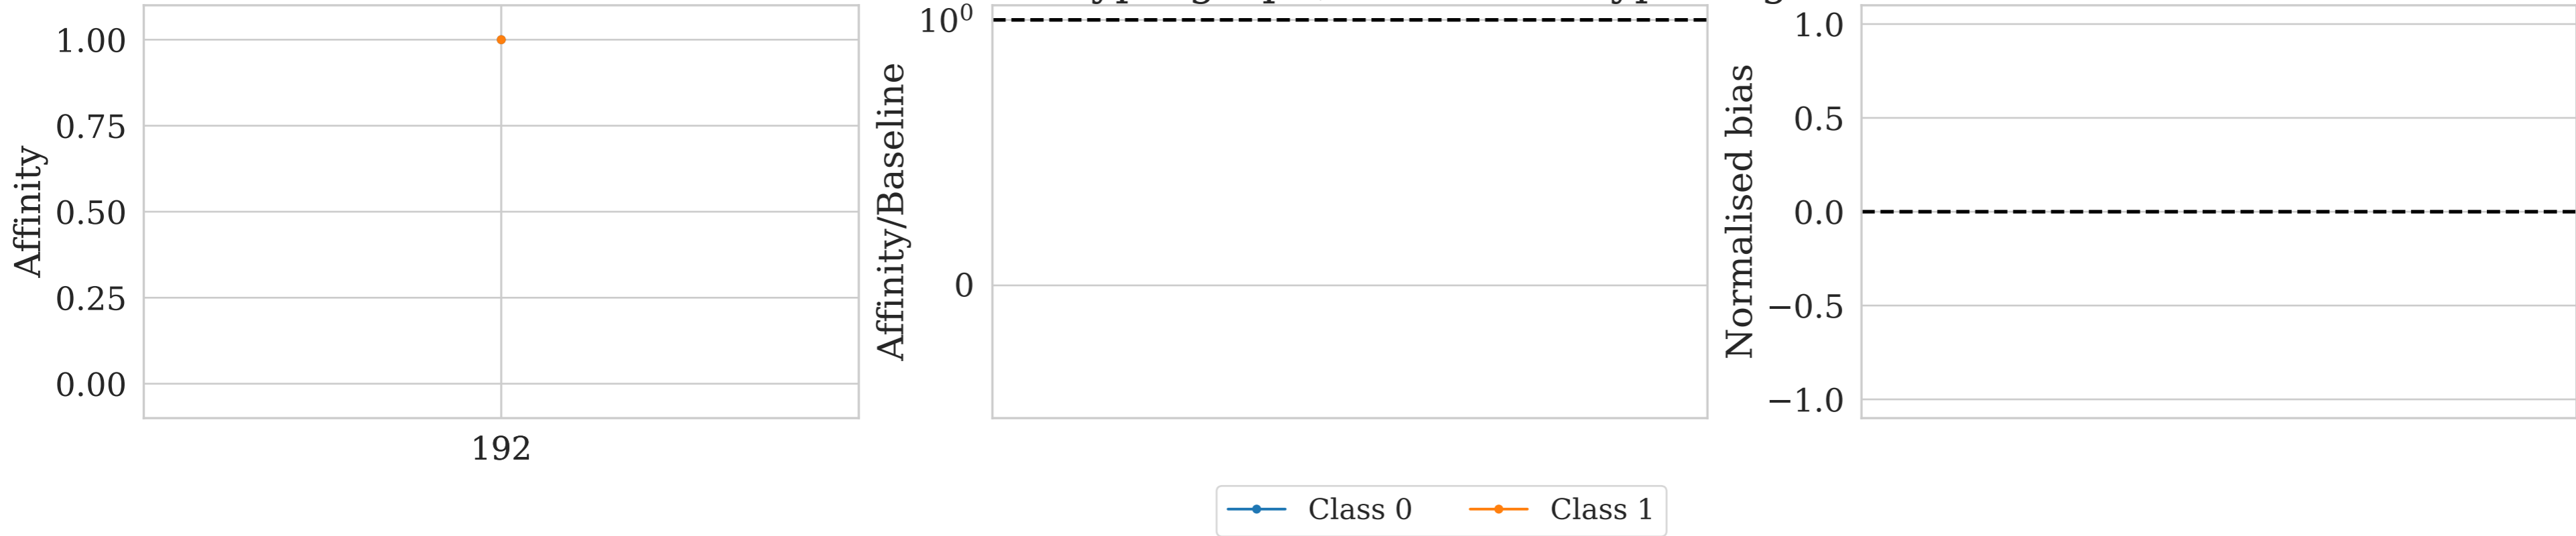

24-uniform hypergraph, number of hyperedges: 26

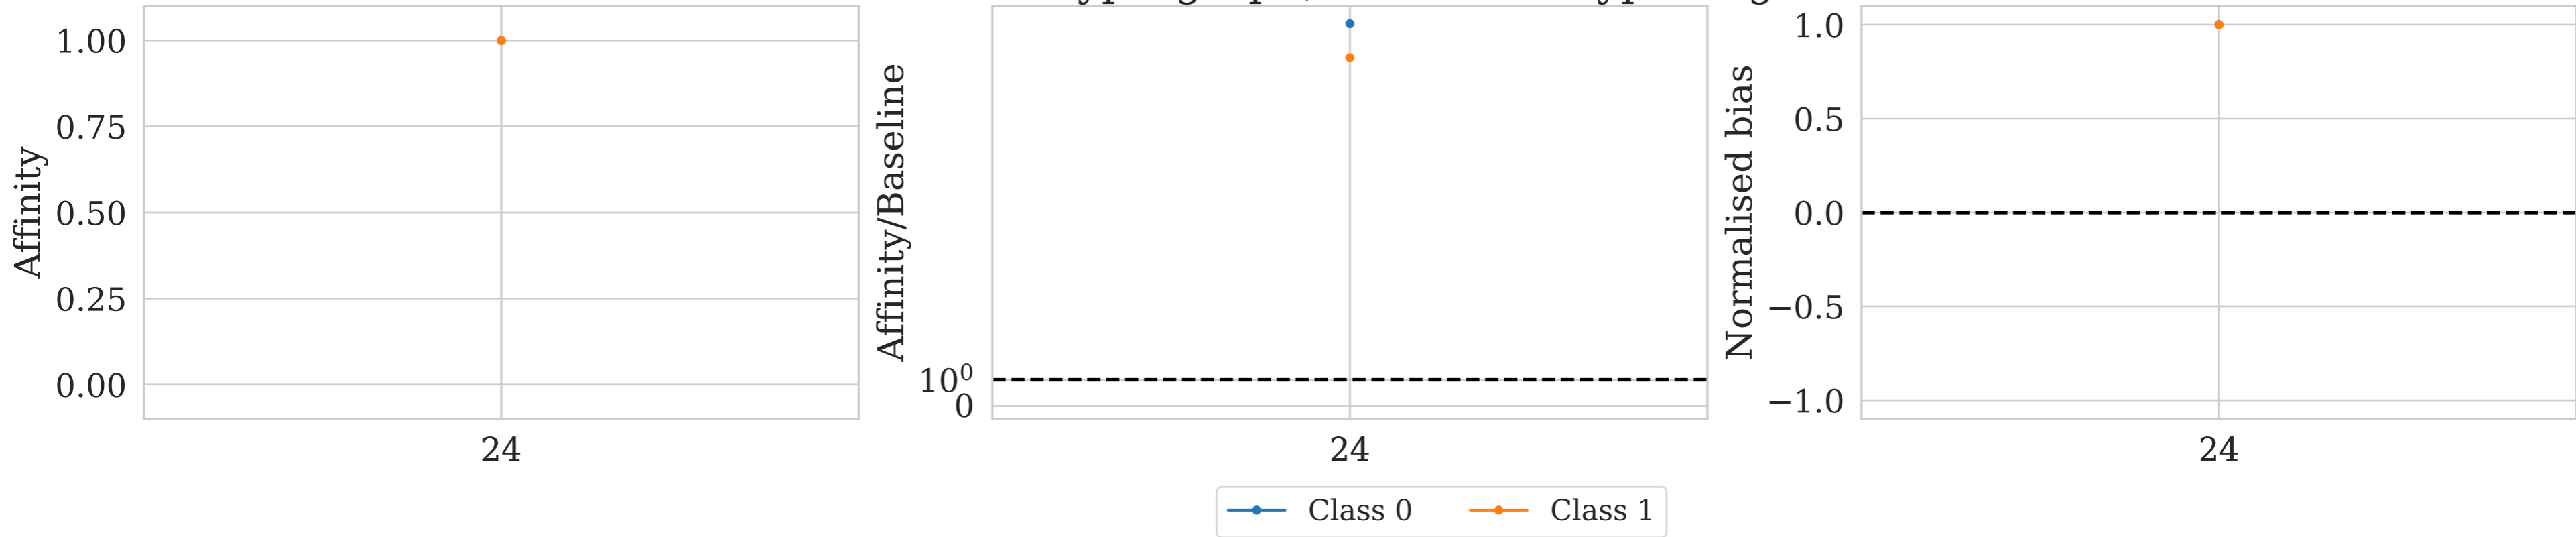

8-uniform hypergraph, number of hyperedges: 23

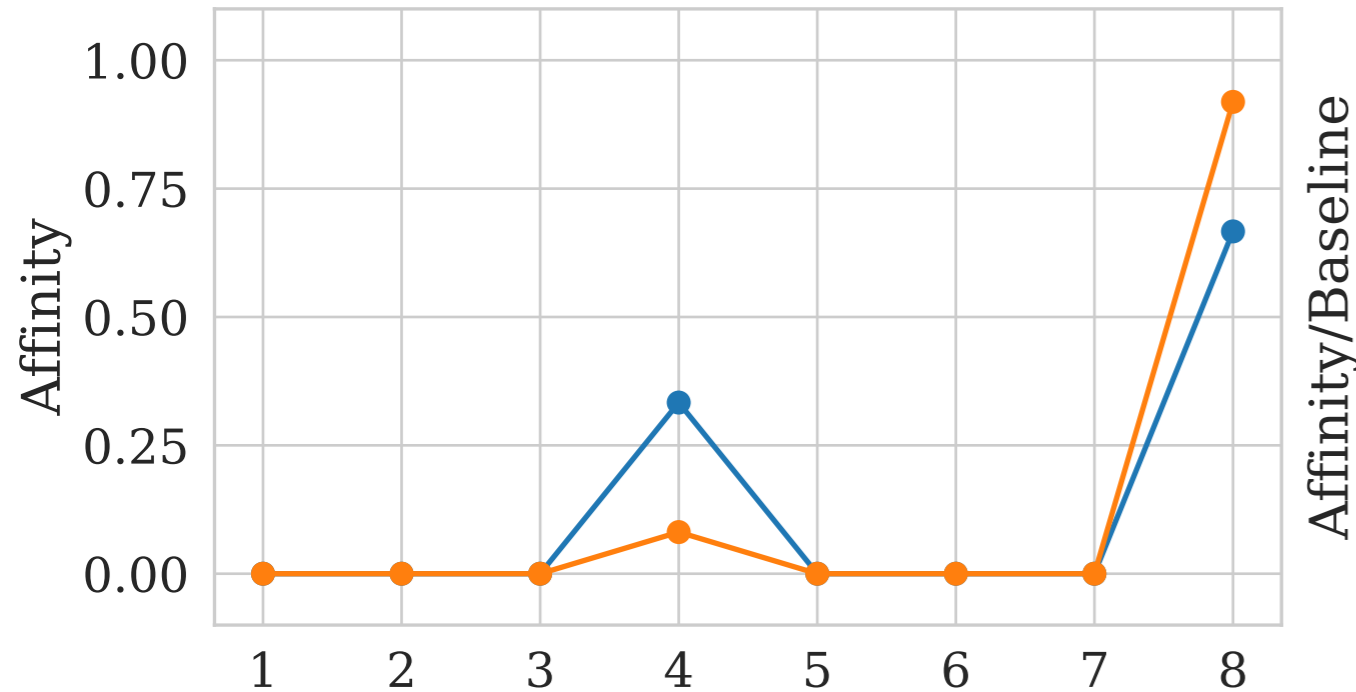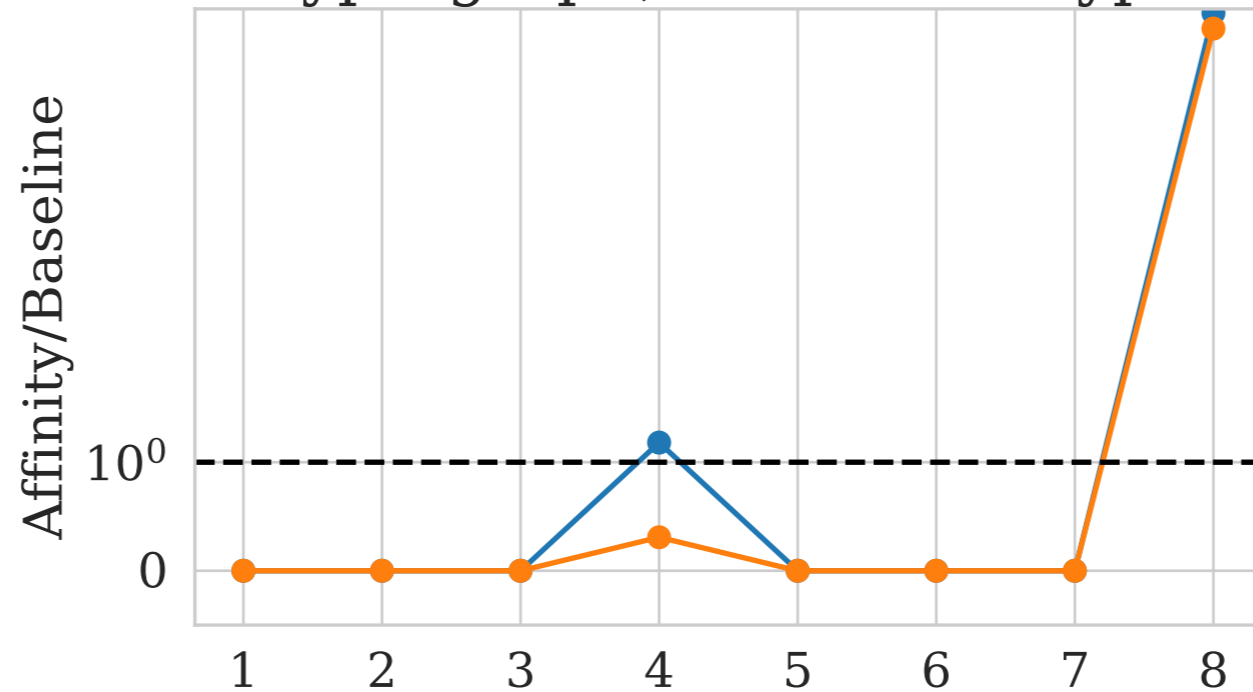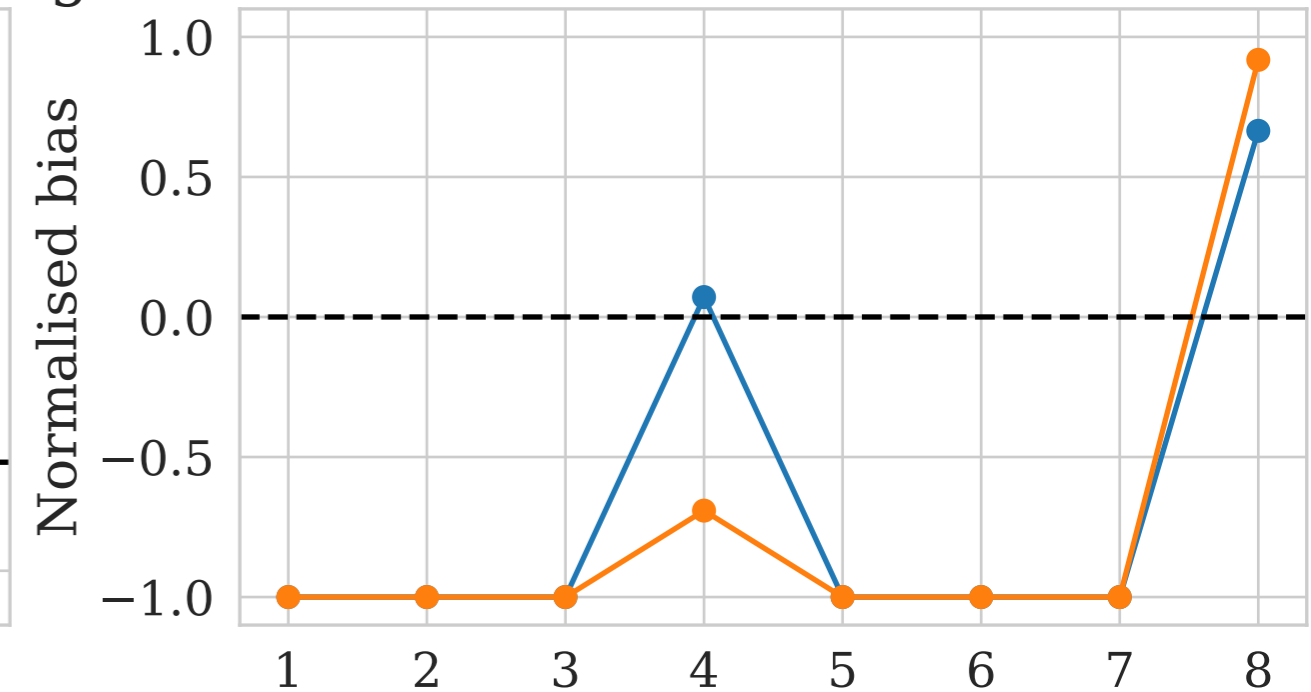

Class 0 Class 1

144-uniform hypergraph, number of hyperedges: 20

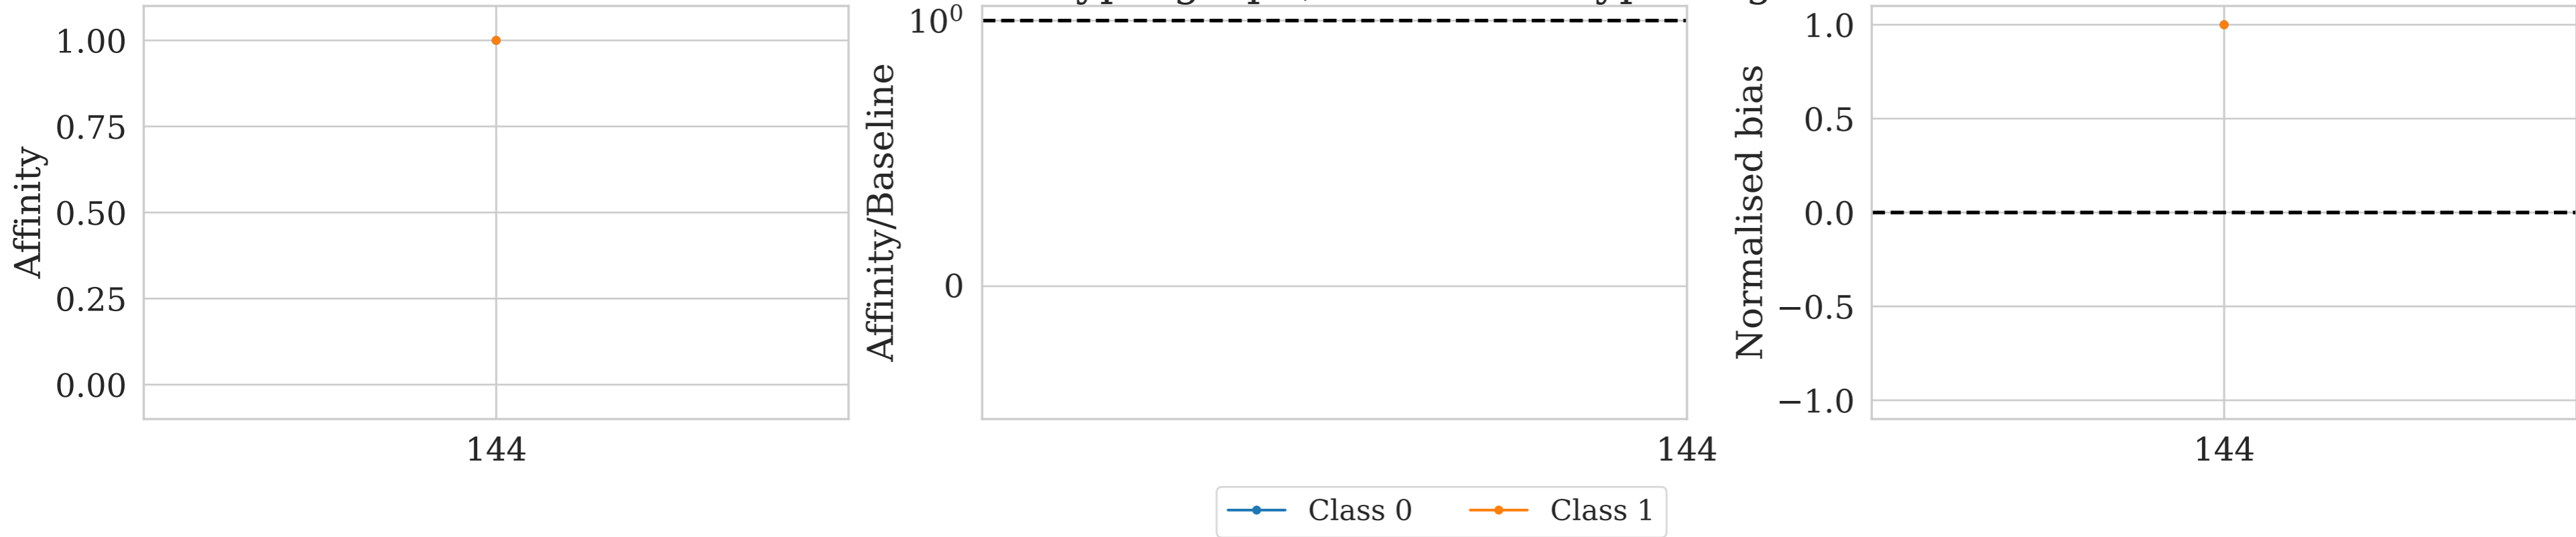

64-uniform hypergraph, number of hyperedges: 17

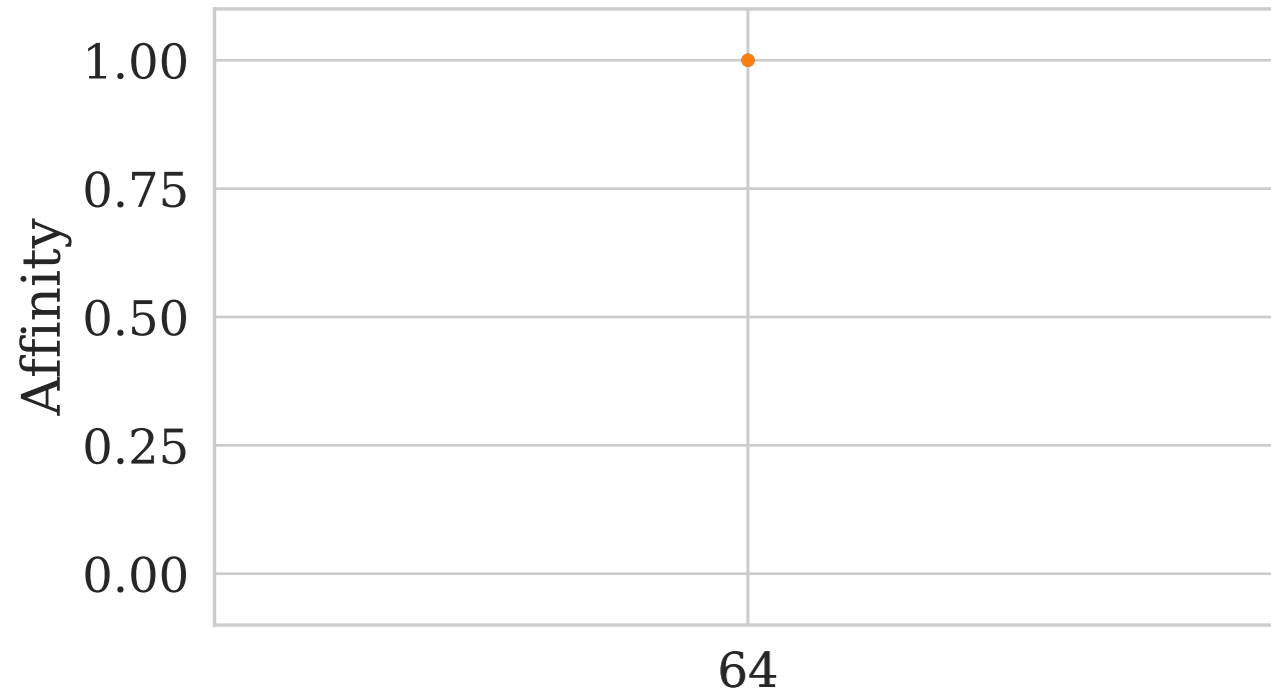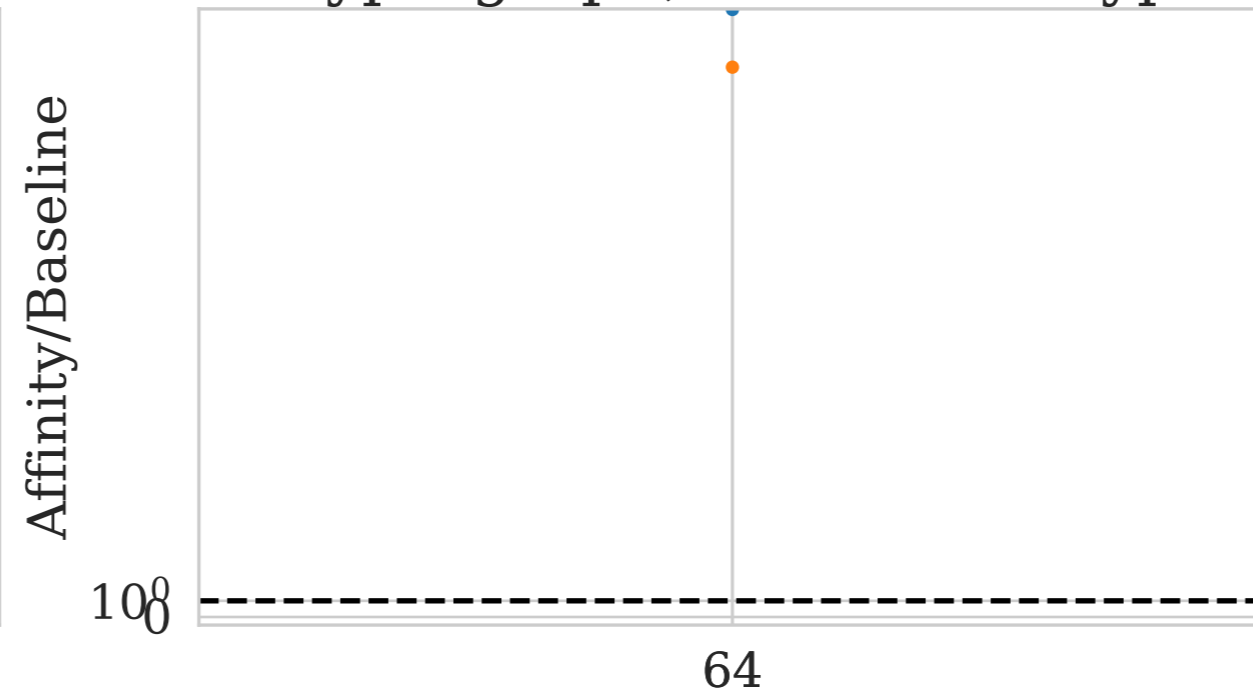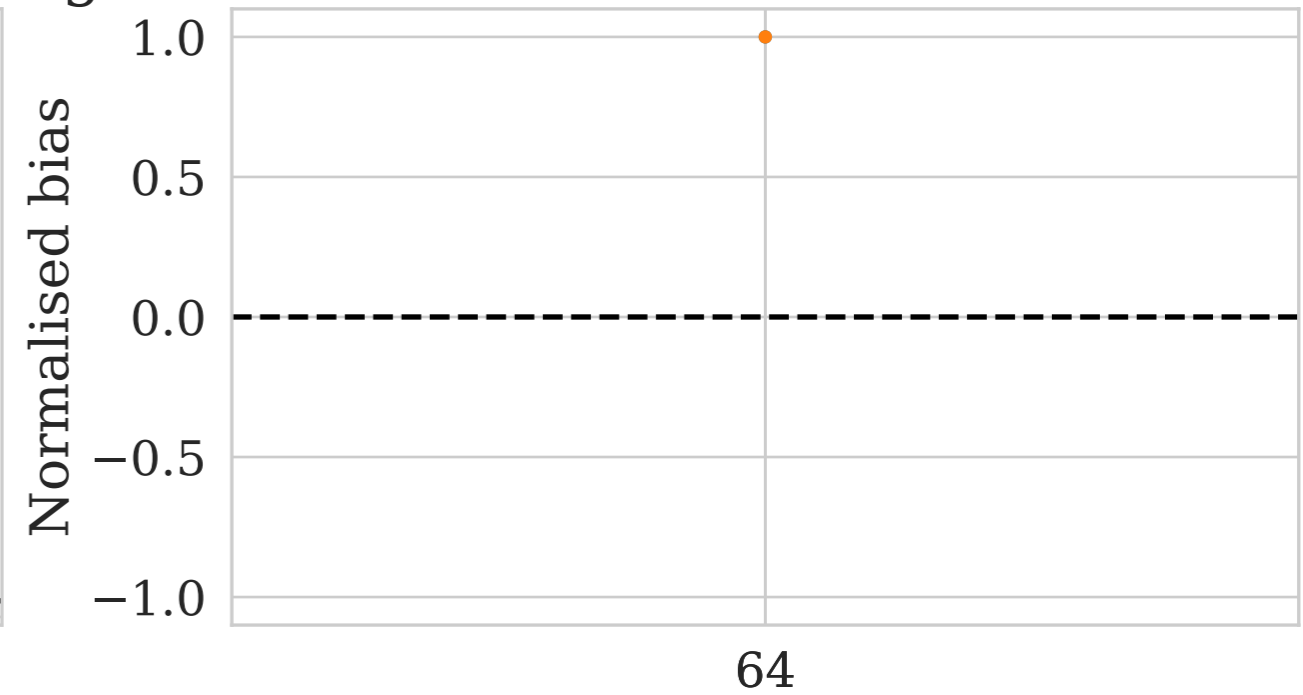

Class 0 Class 1

108-uniform hypergraph, number of hyperedges: 17

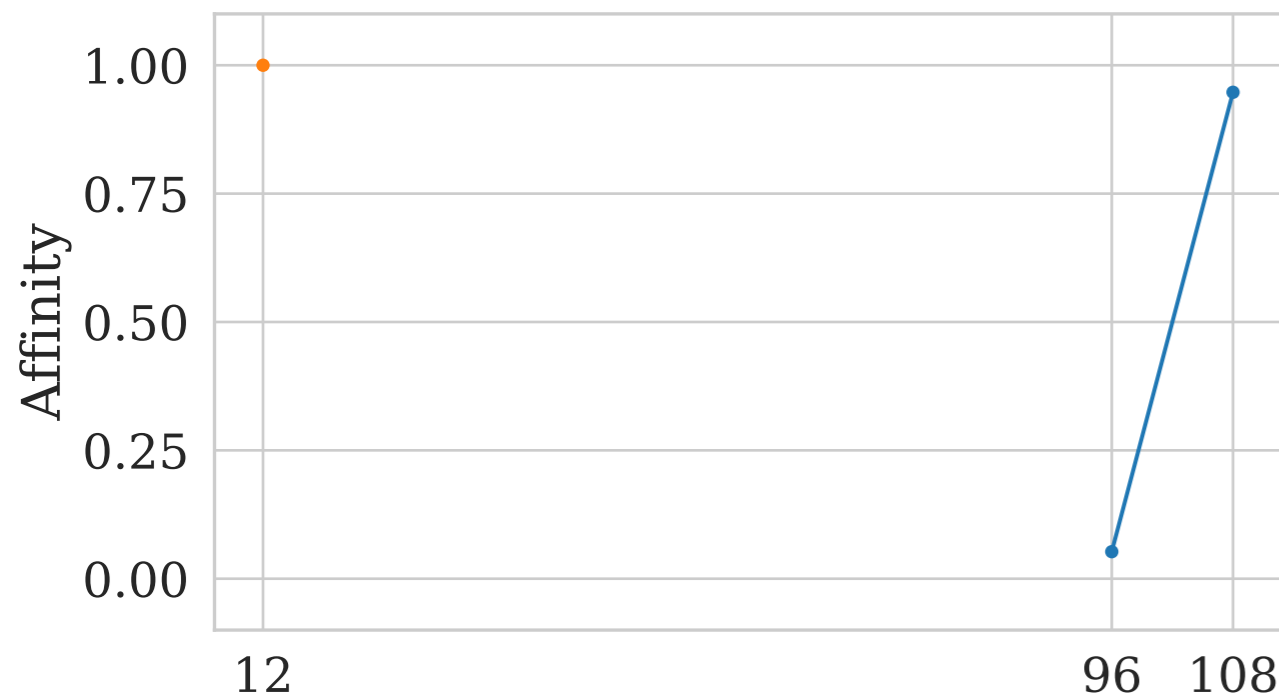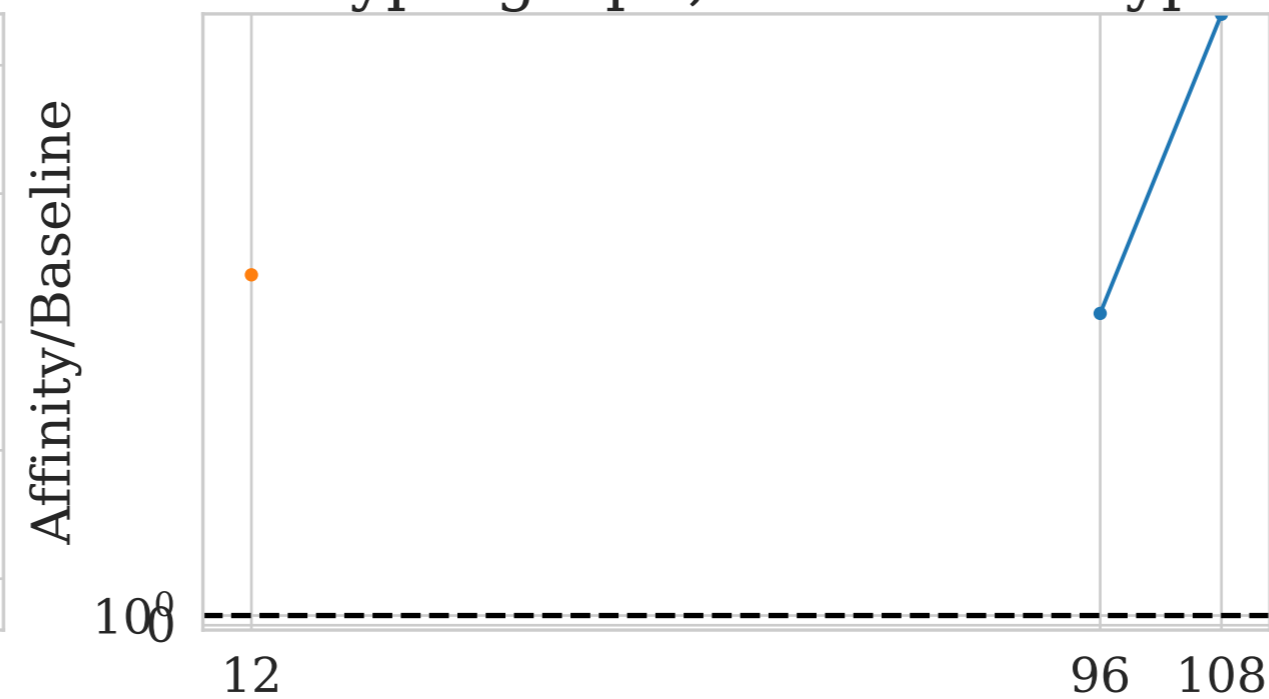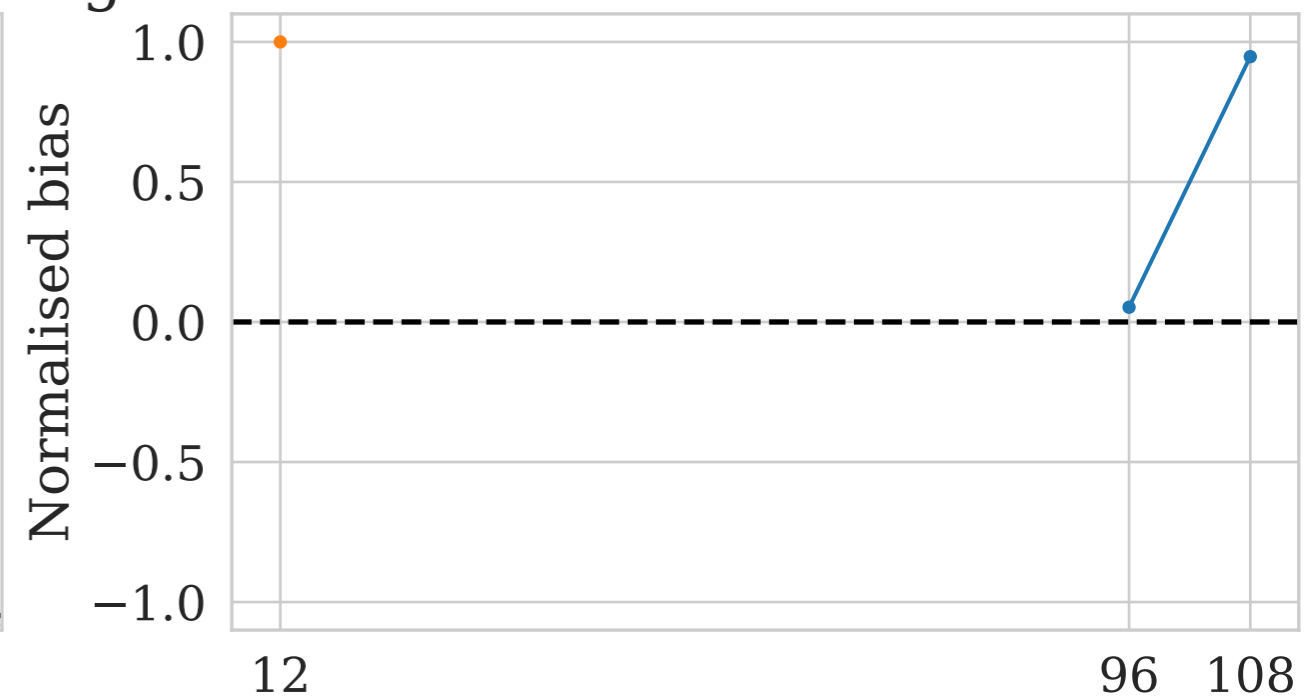

Class 0 Class 1

48-uniform hypergraph, number of hyperedges: 12

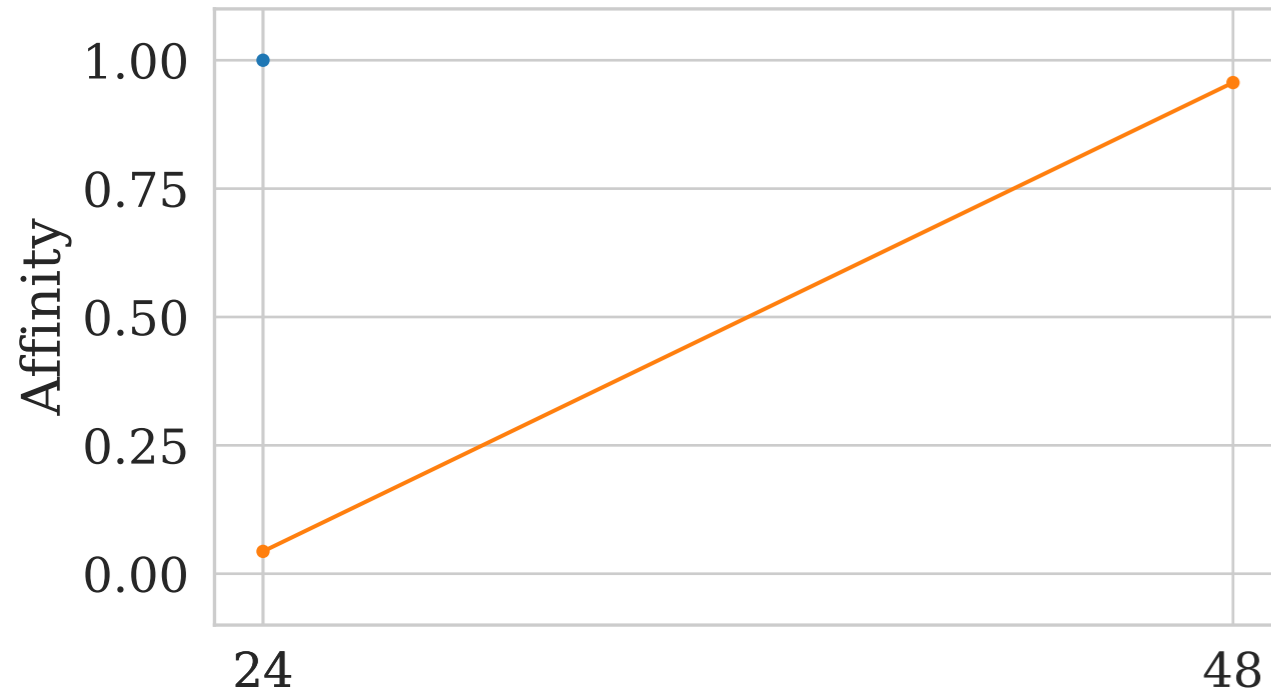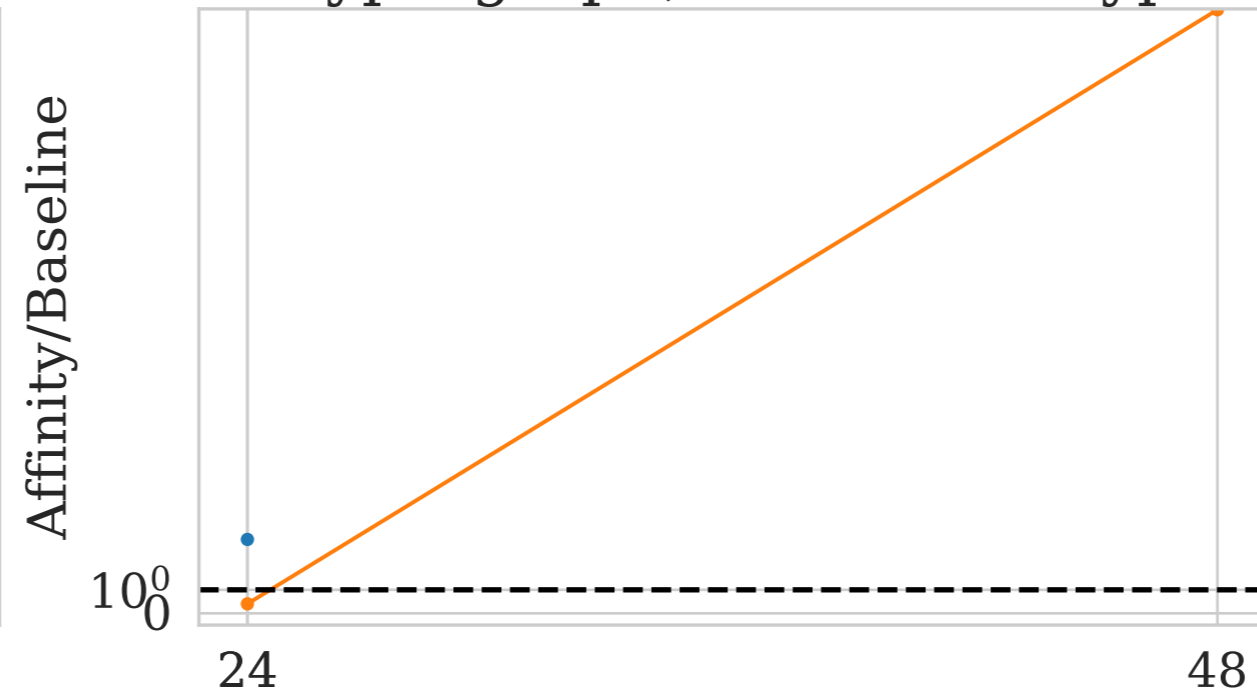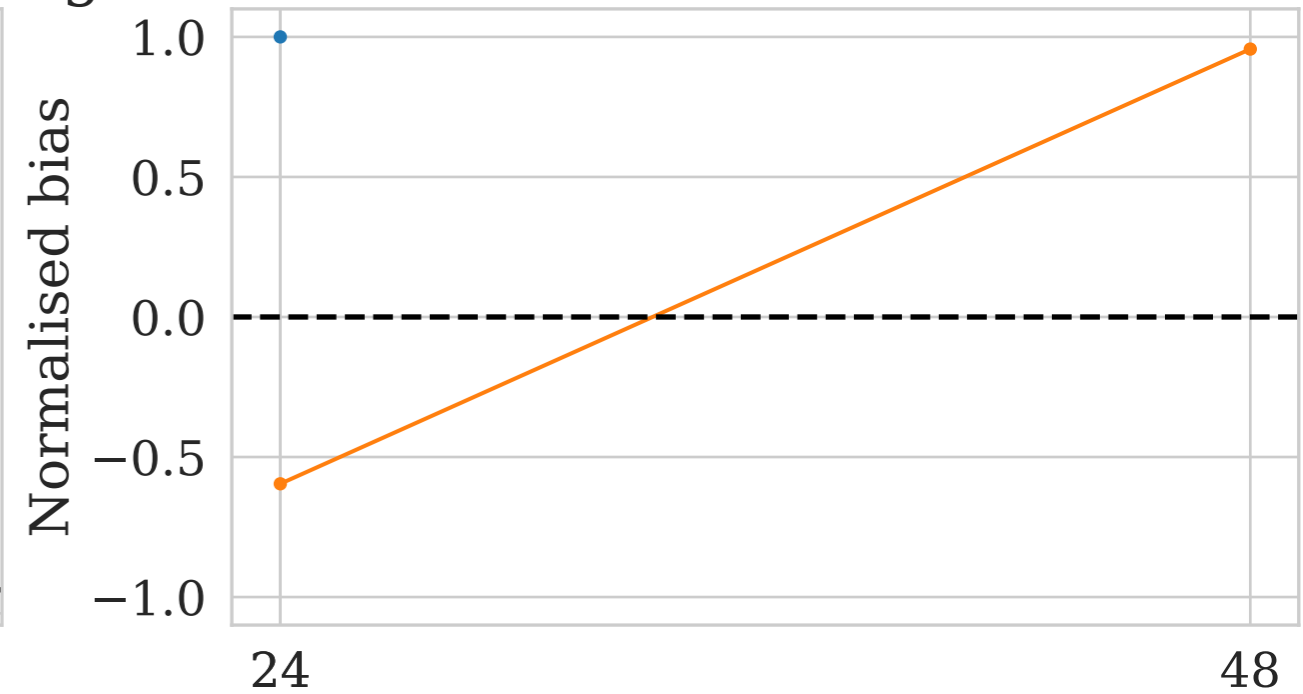

Class 0 Class 1

12-uniform hypergraph, number of hyperedges: 10

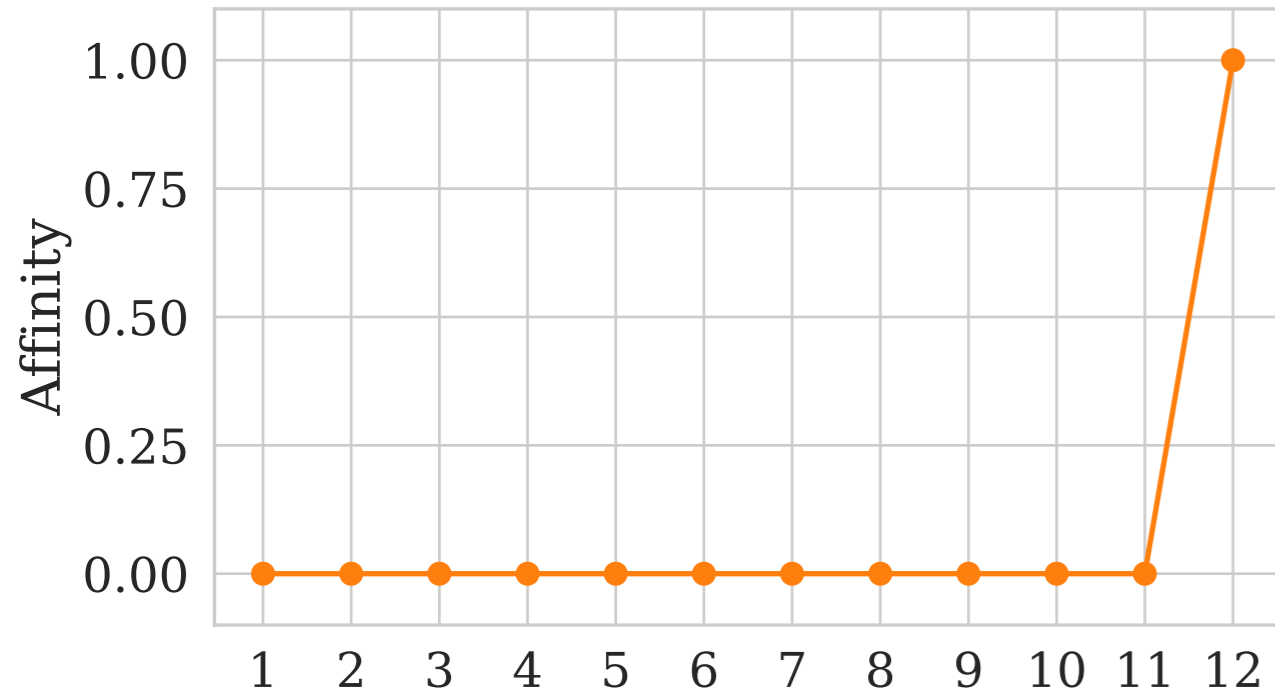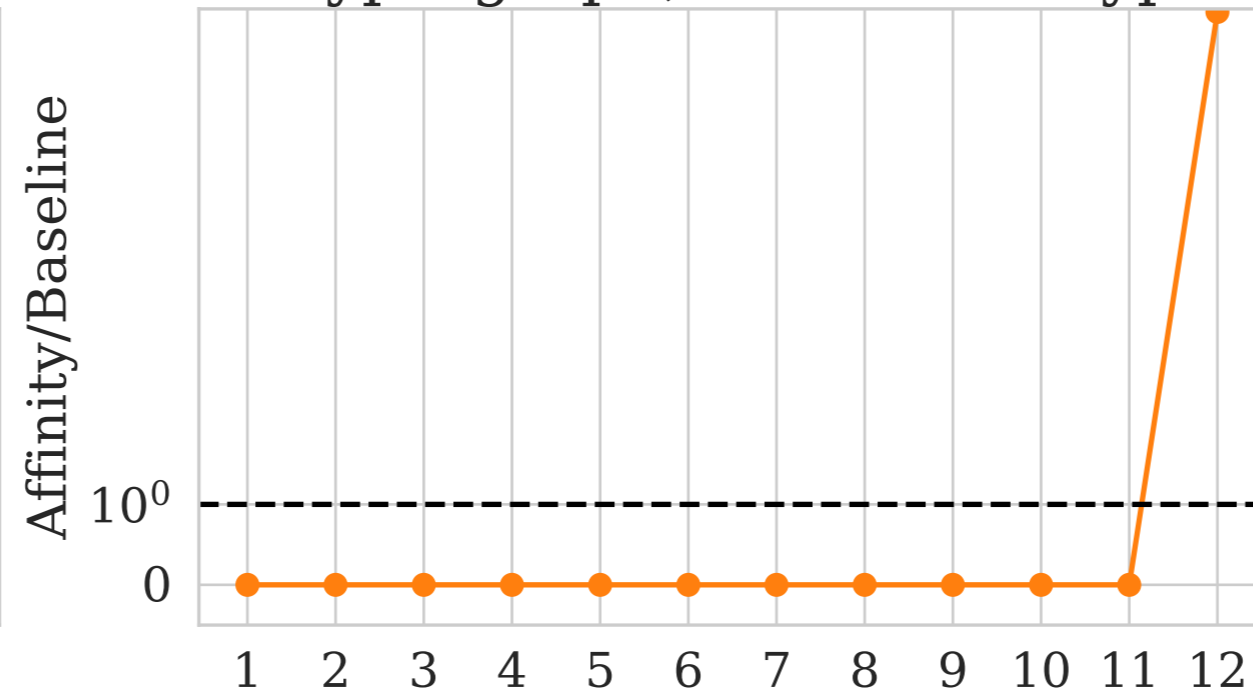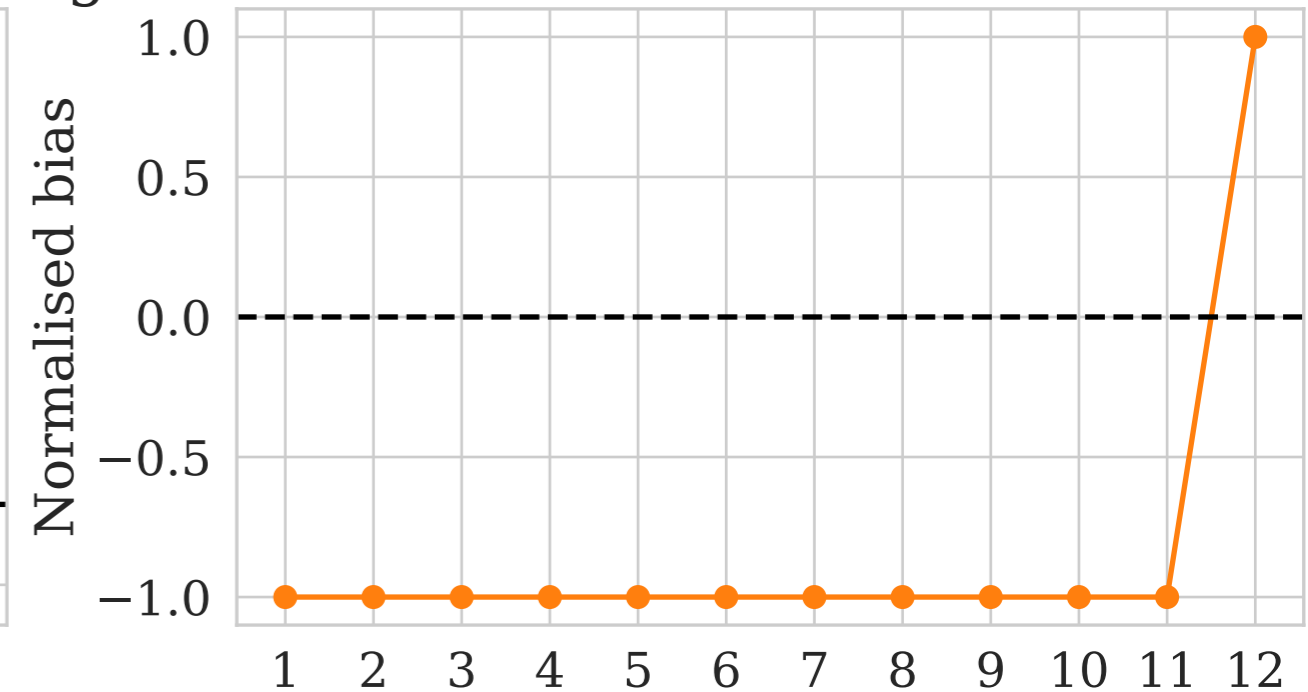

Class 0 Class 1

72-uniform hypergraph, number of hyperedges: 10

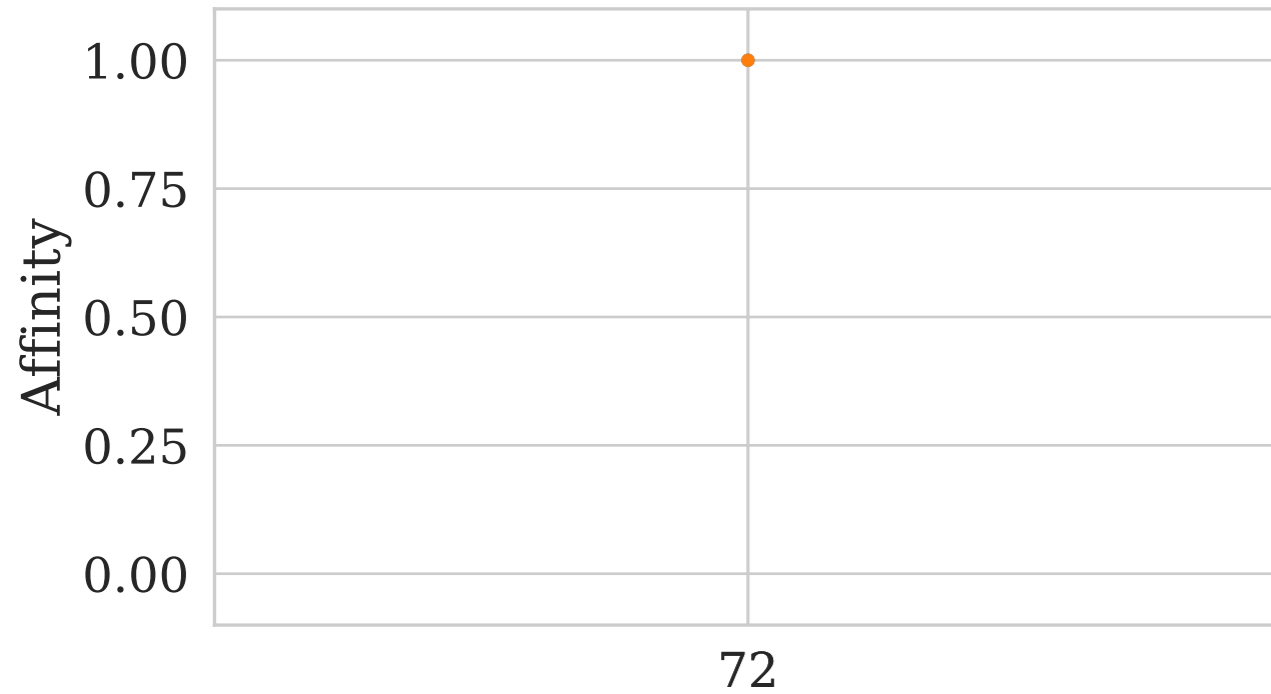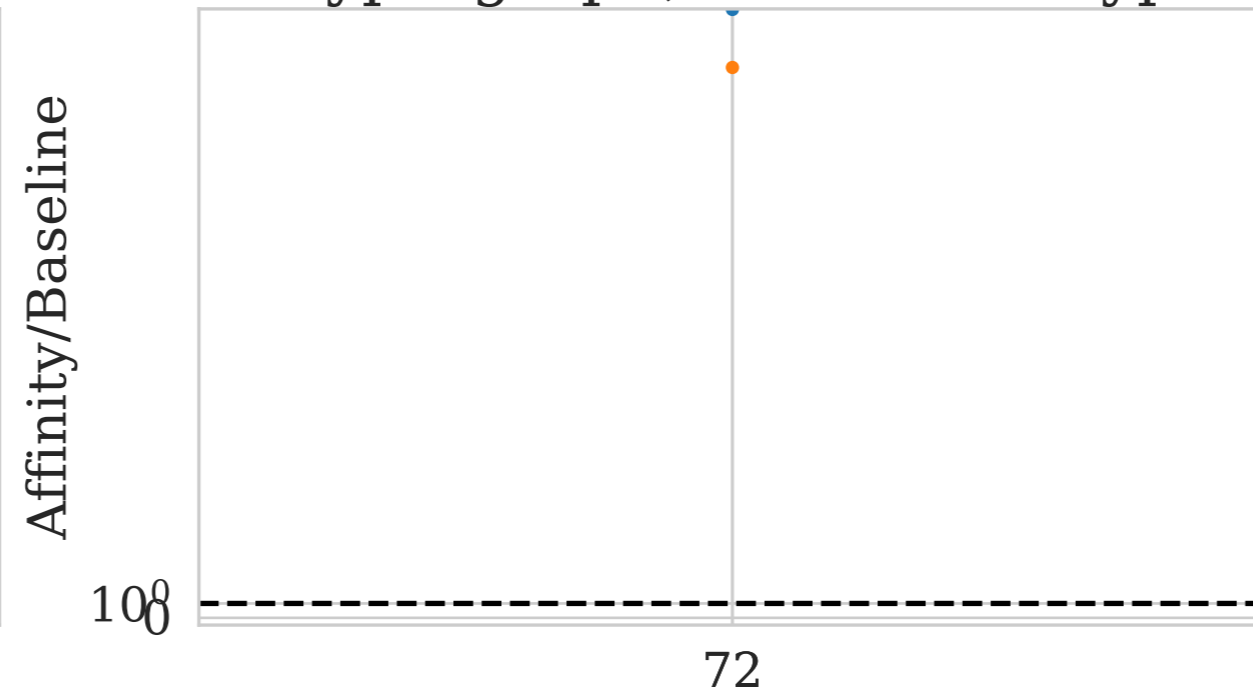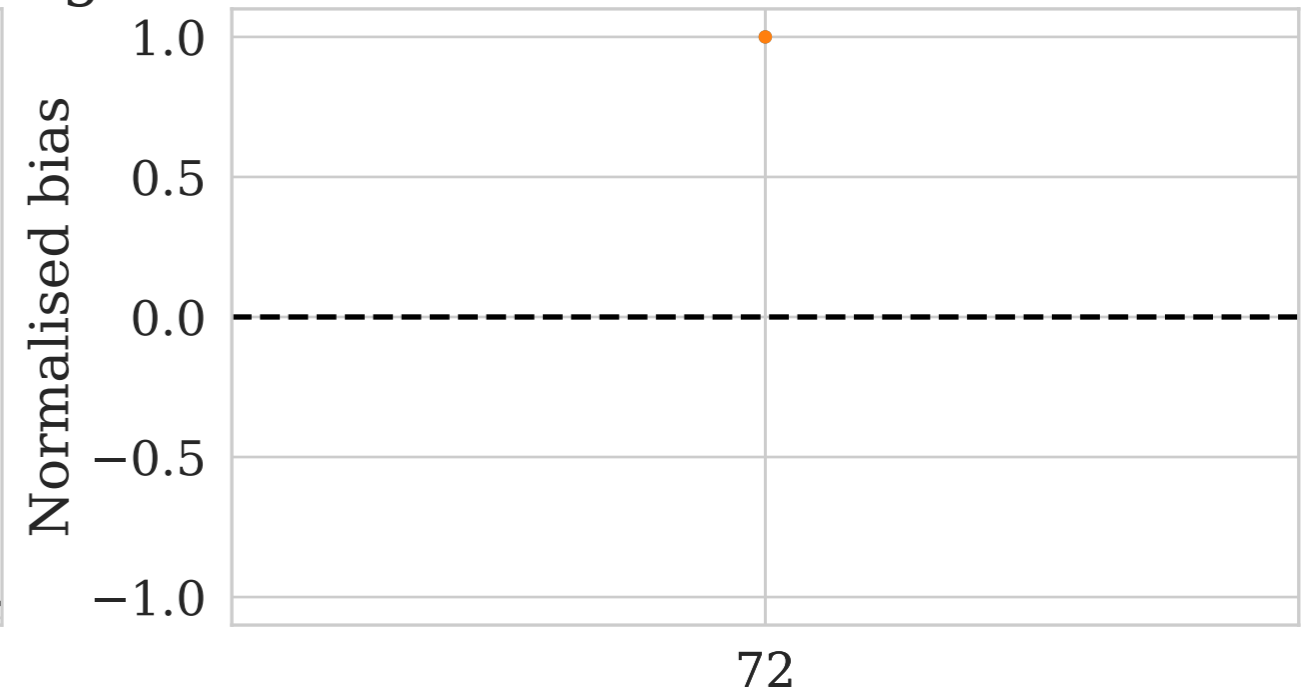

Class 0 Class 1

2-uniform hypergraph, number of hyperedges: 8

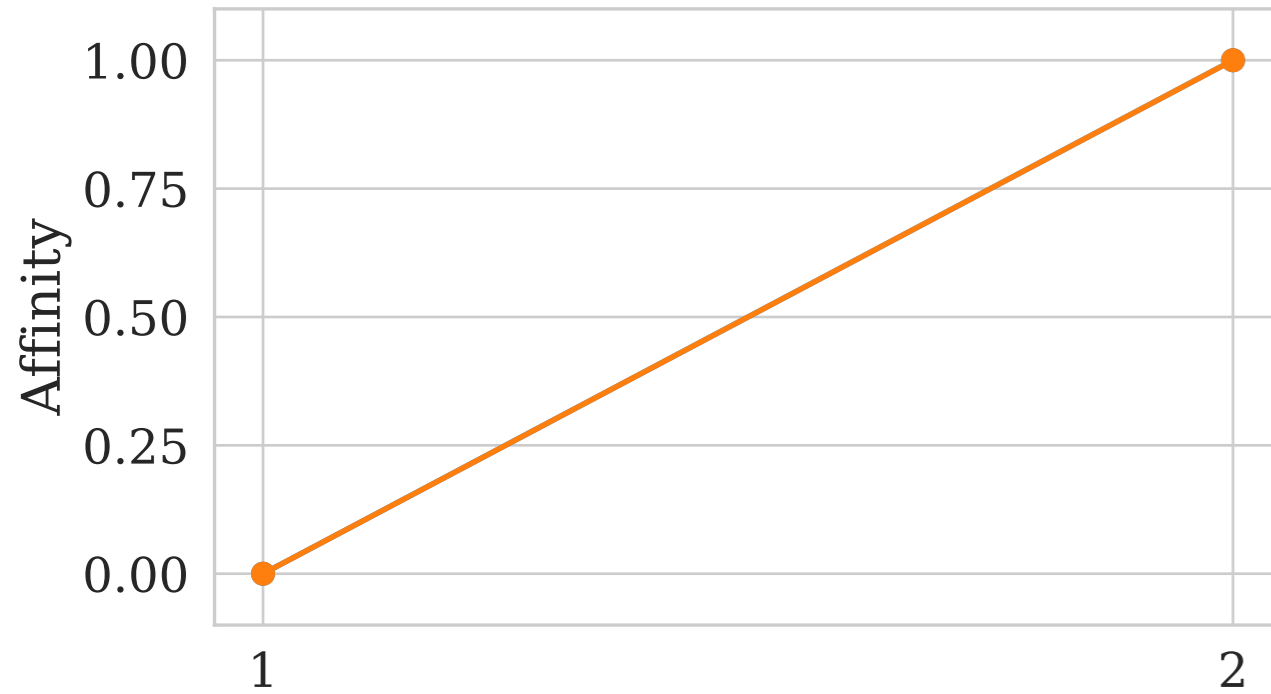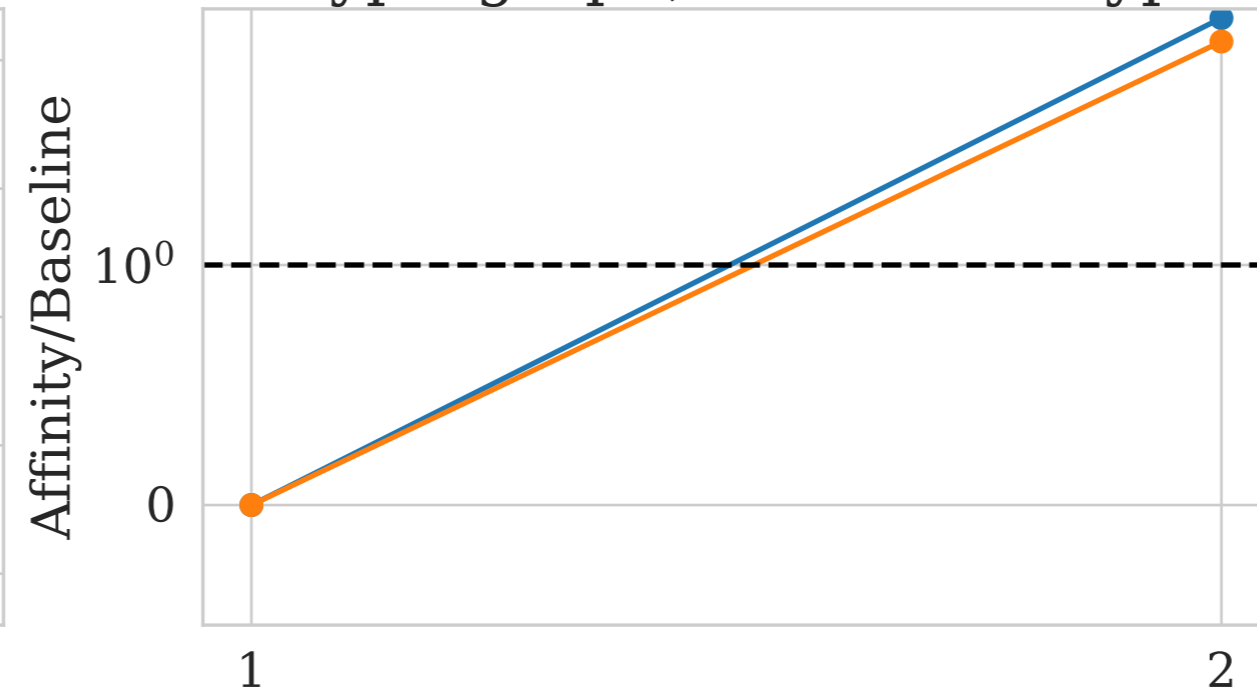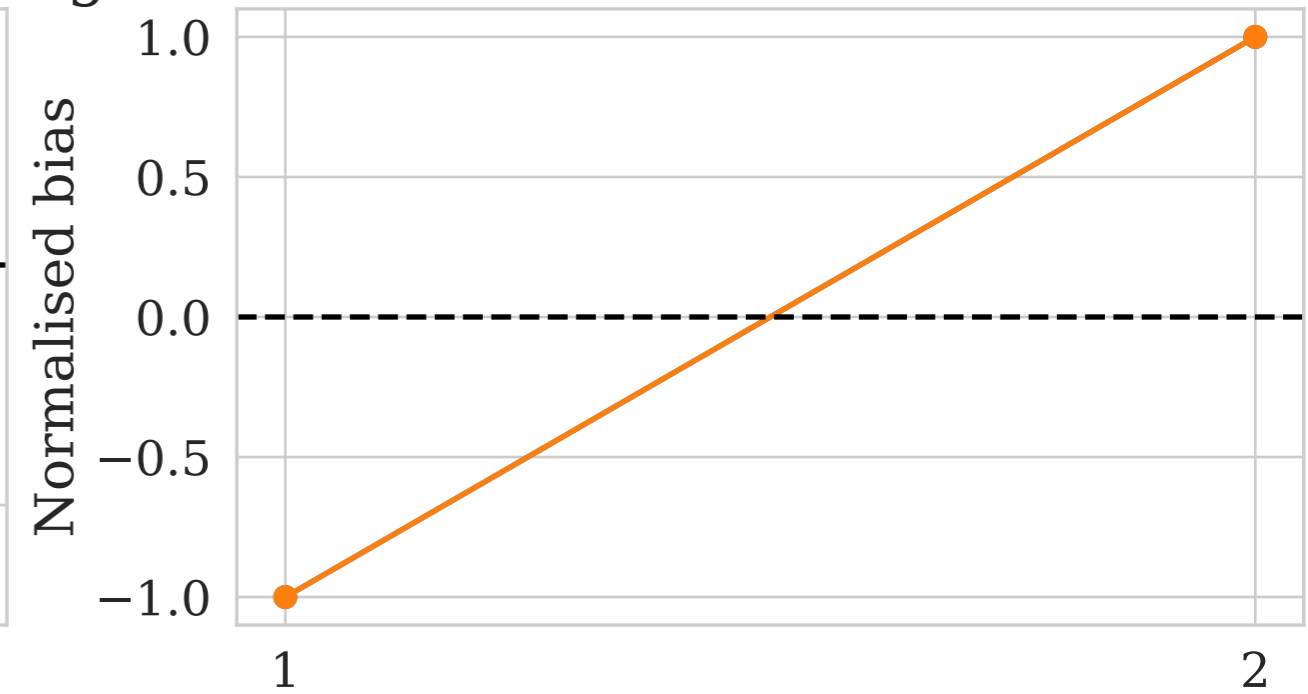

Class 0 Class 1

16-uniform hypergraph, number of hyperedges: 8

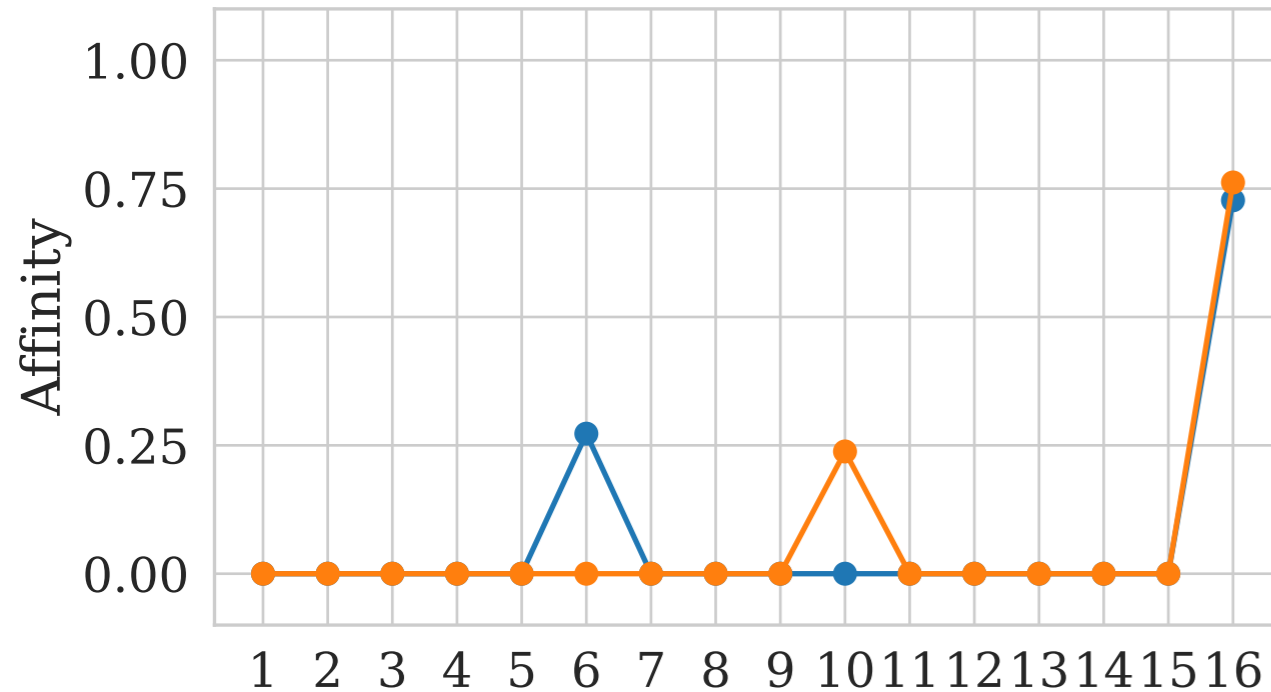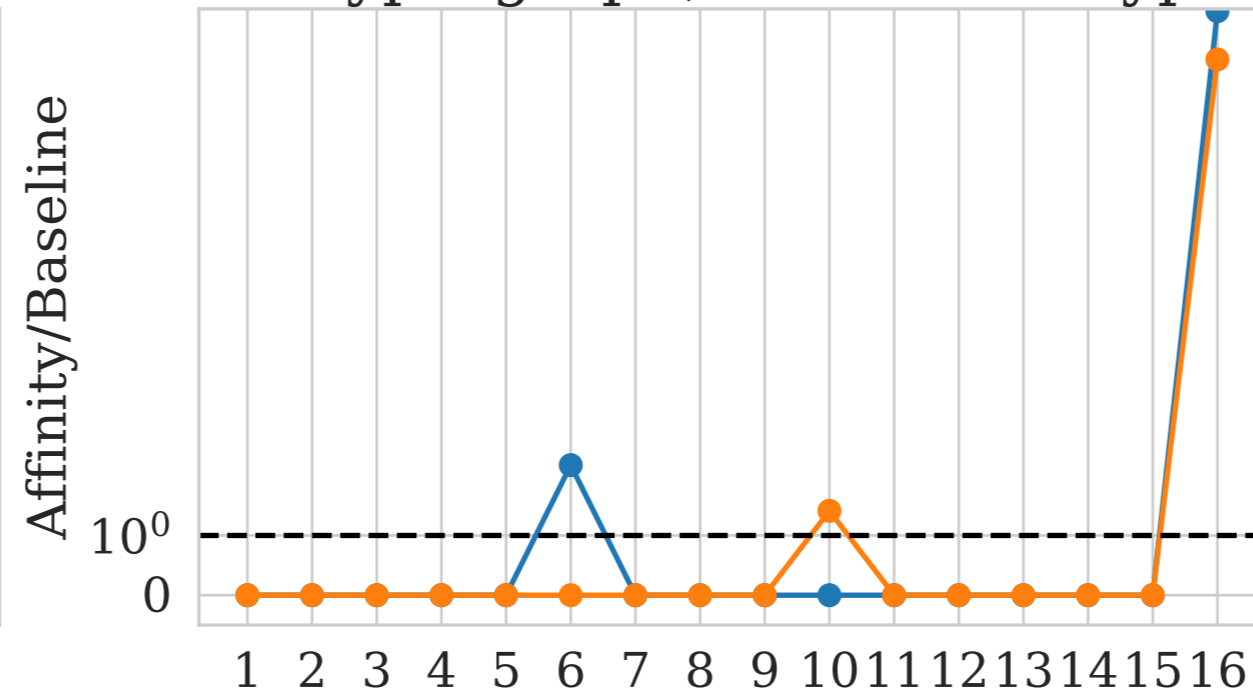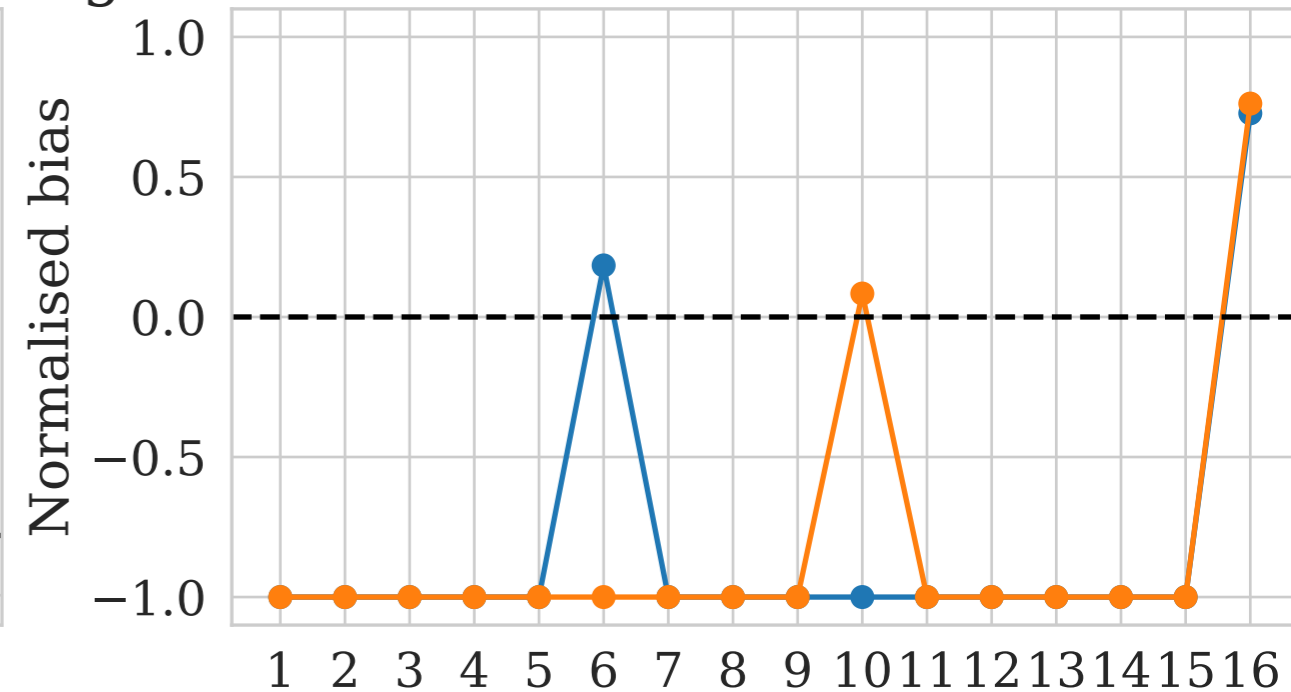

Class 0 Class 1

4-uniform hypergraph, number of hyperedges: 7

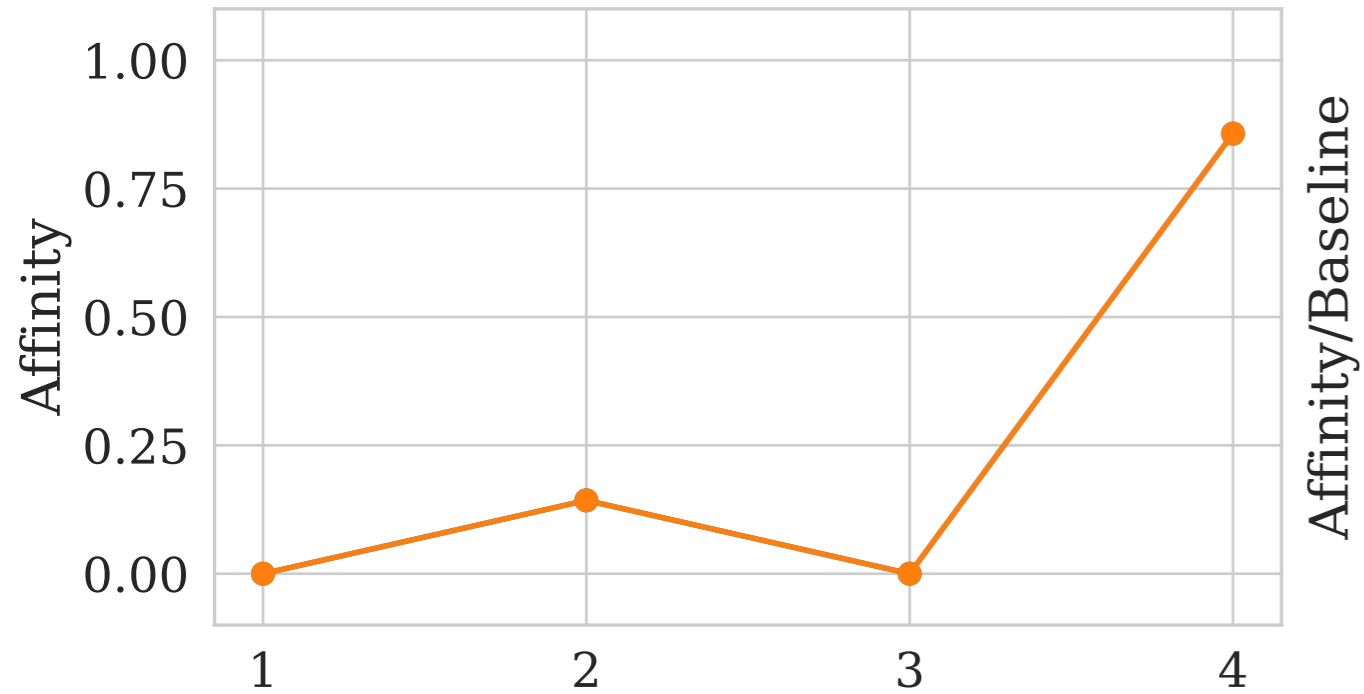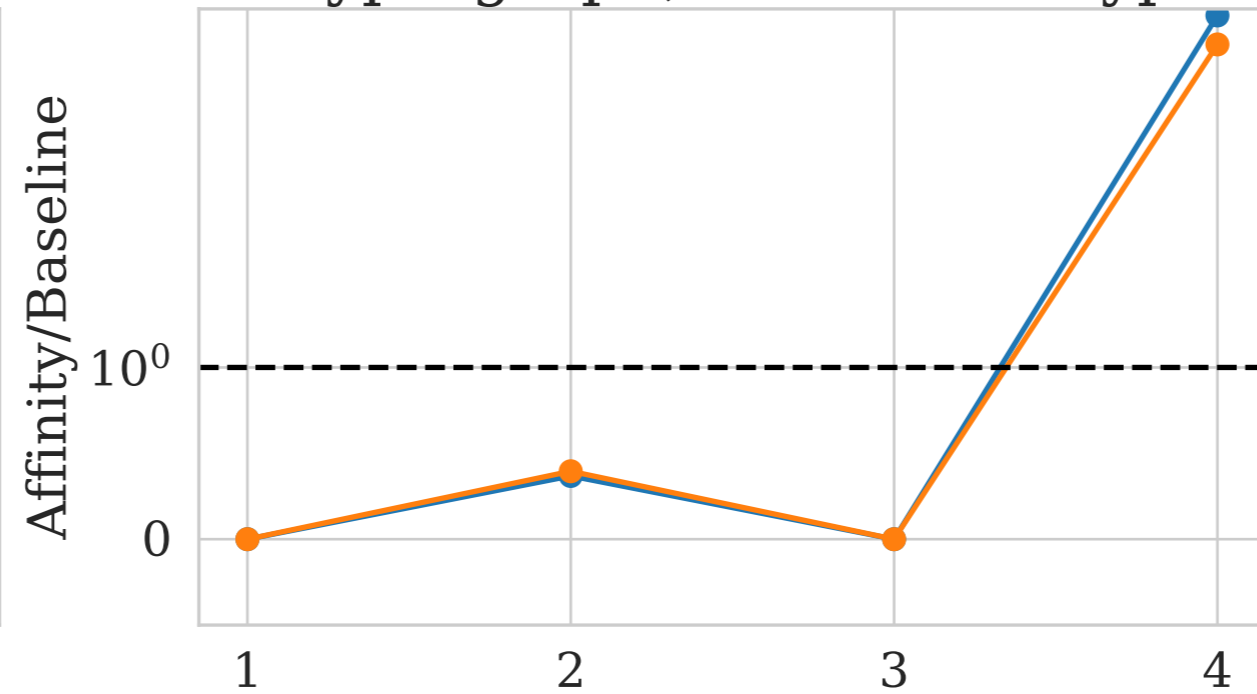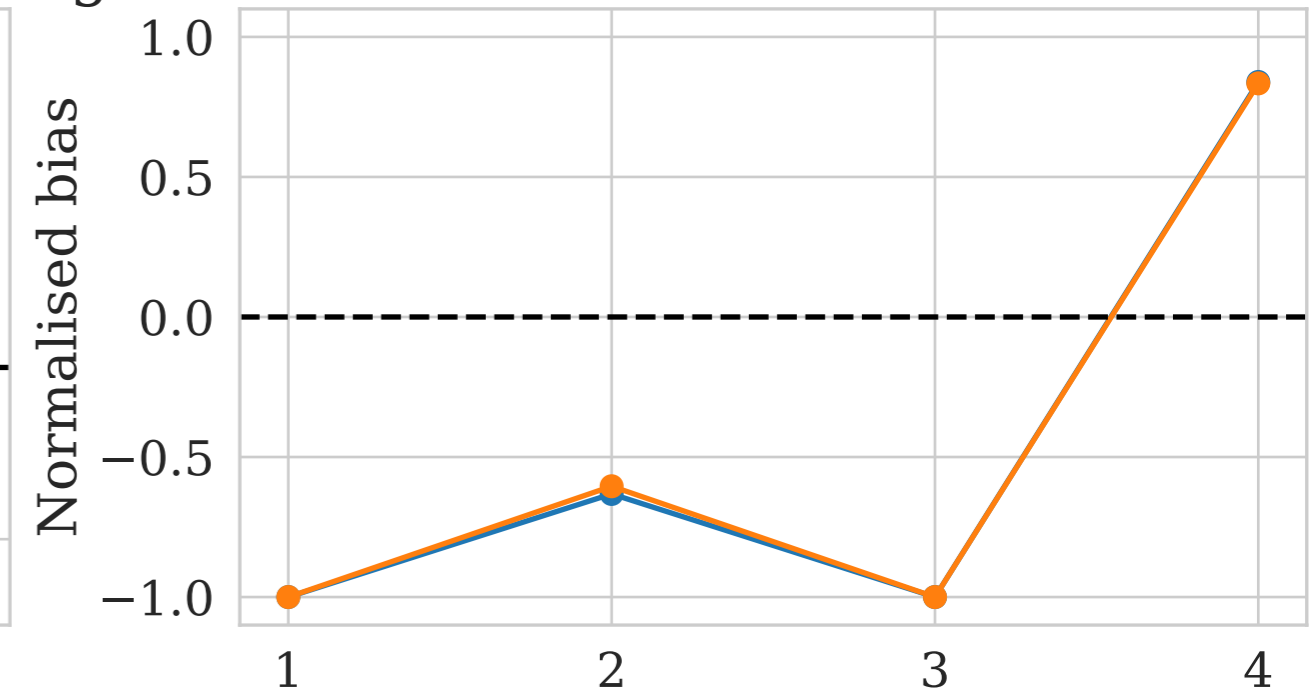

Class 0 Class 1

36-uniform hypergraph, number of hyperedges: 6

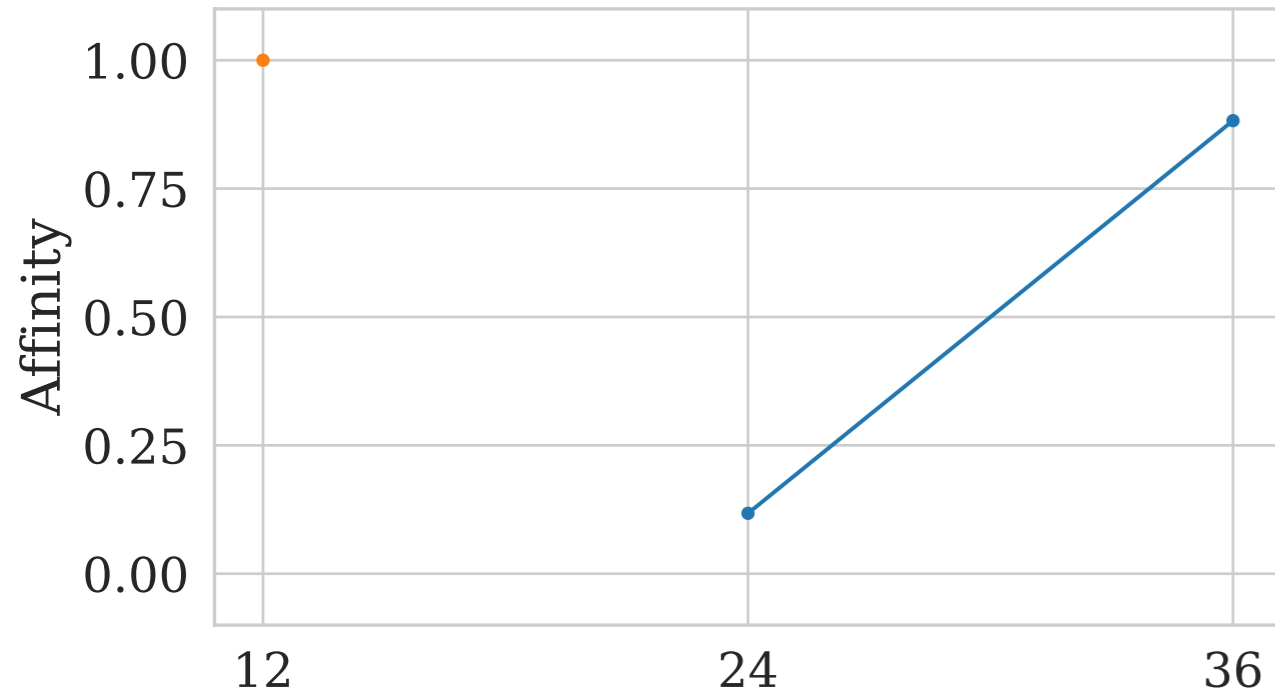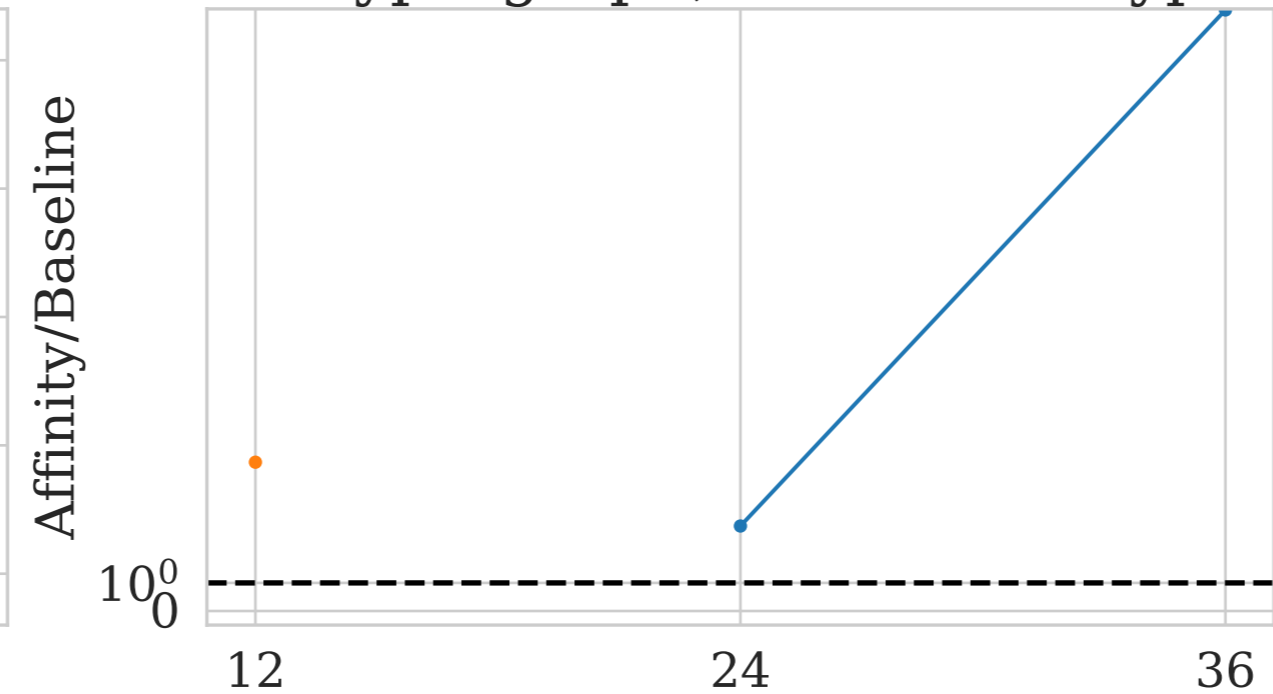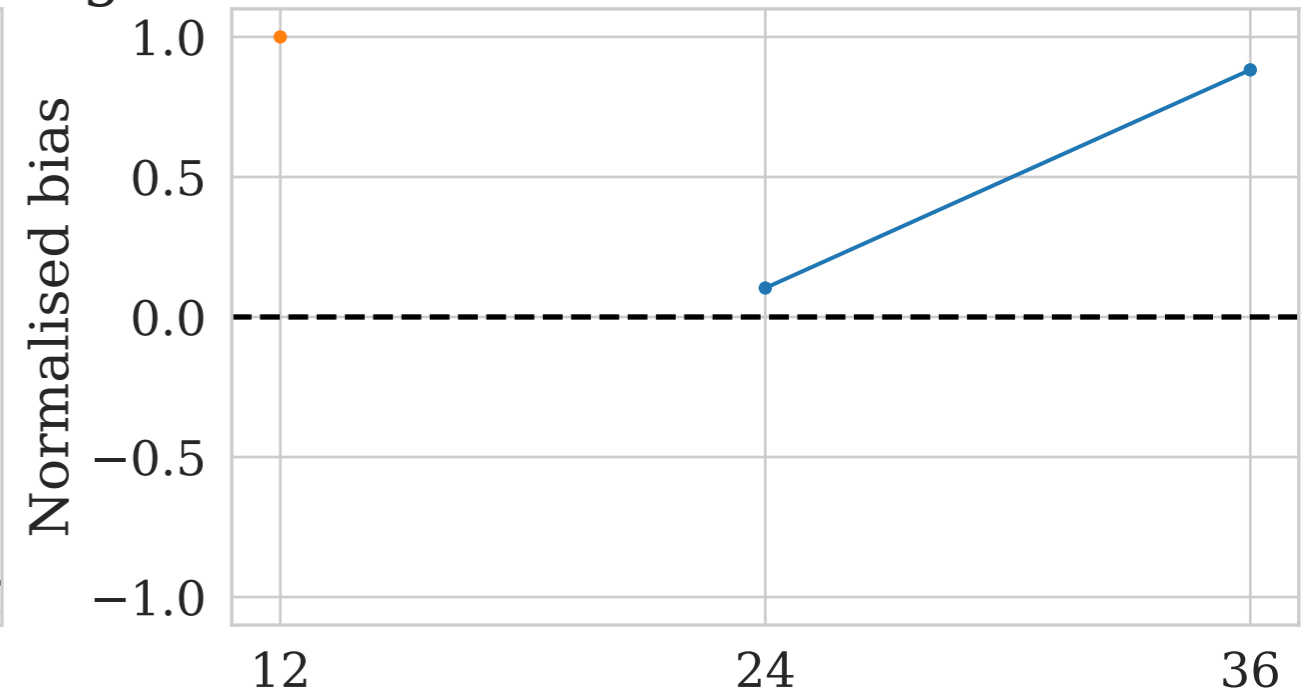

Class 0 Class 1

96-uniform hypergraph, number of hyperedges: 6

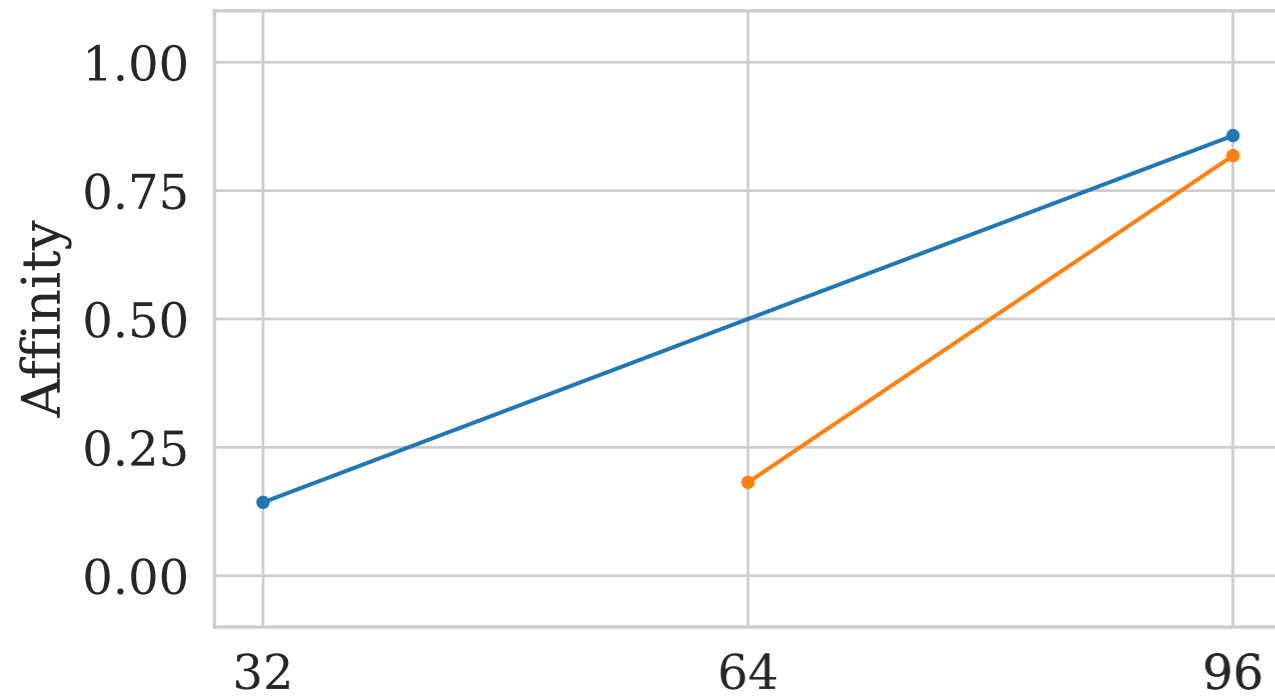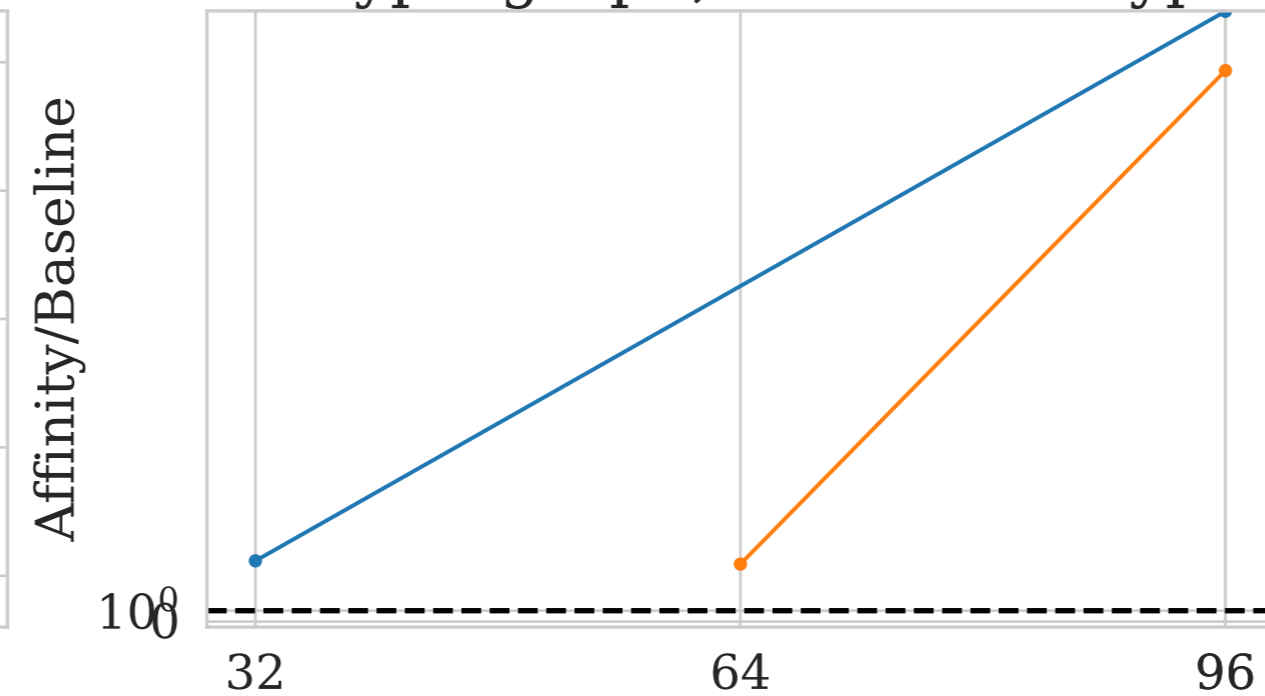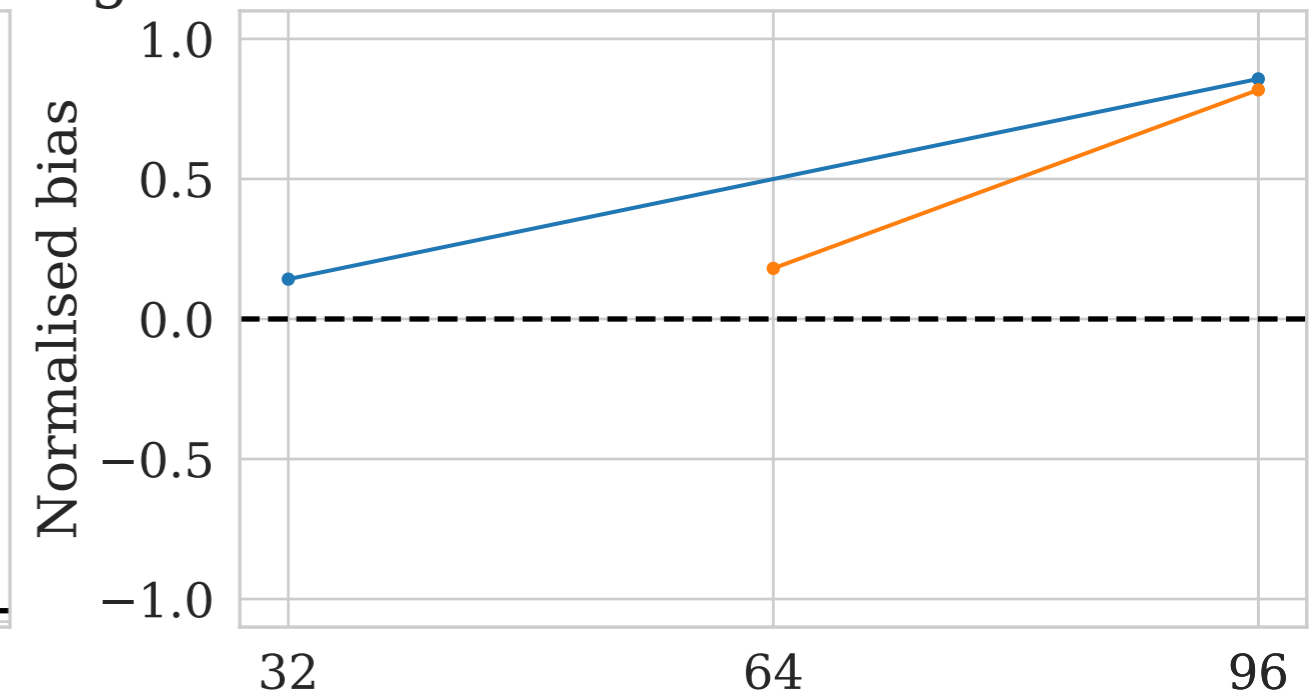

Class 0 Class 1

6-uniform hypergraph, number of hyperedges: 5

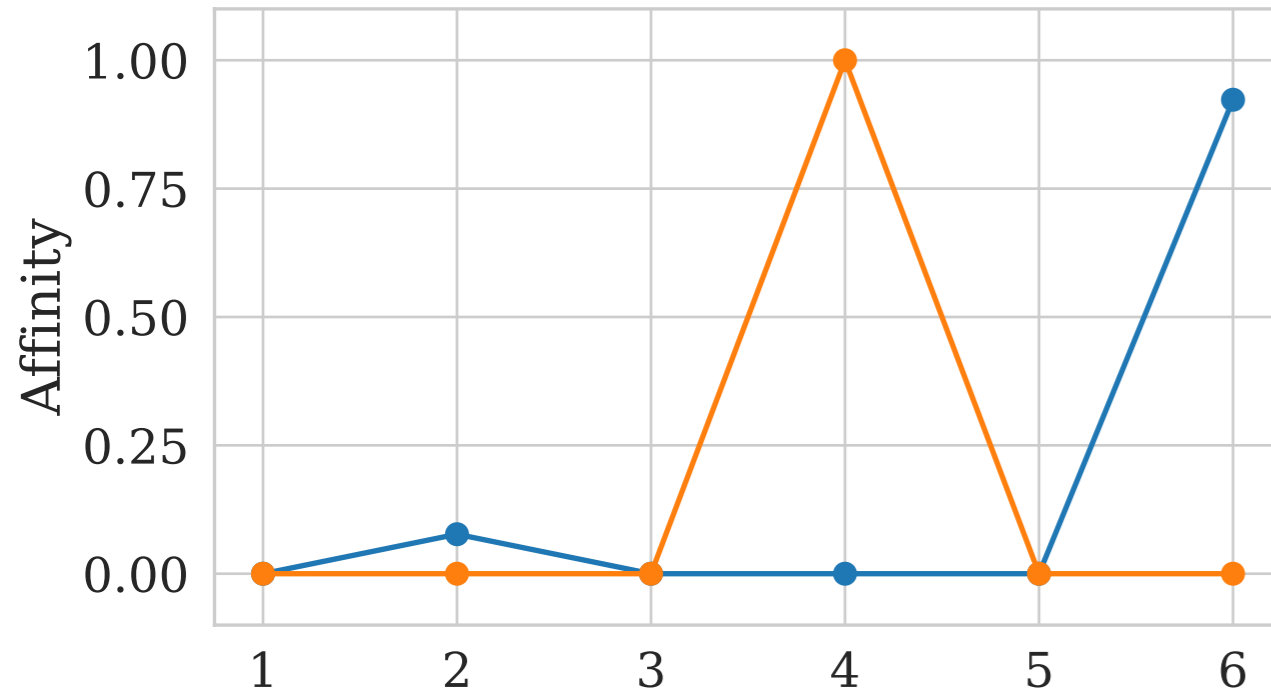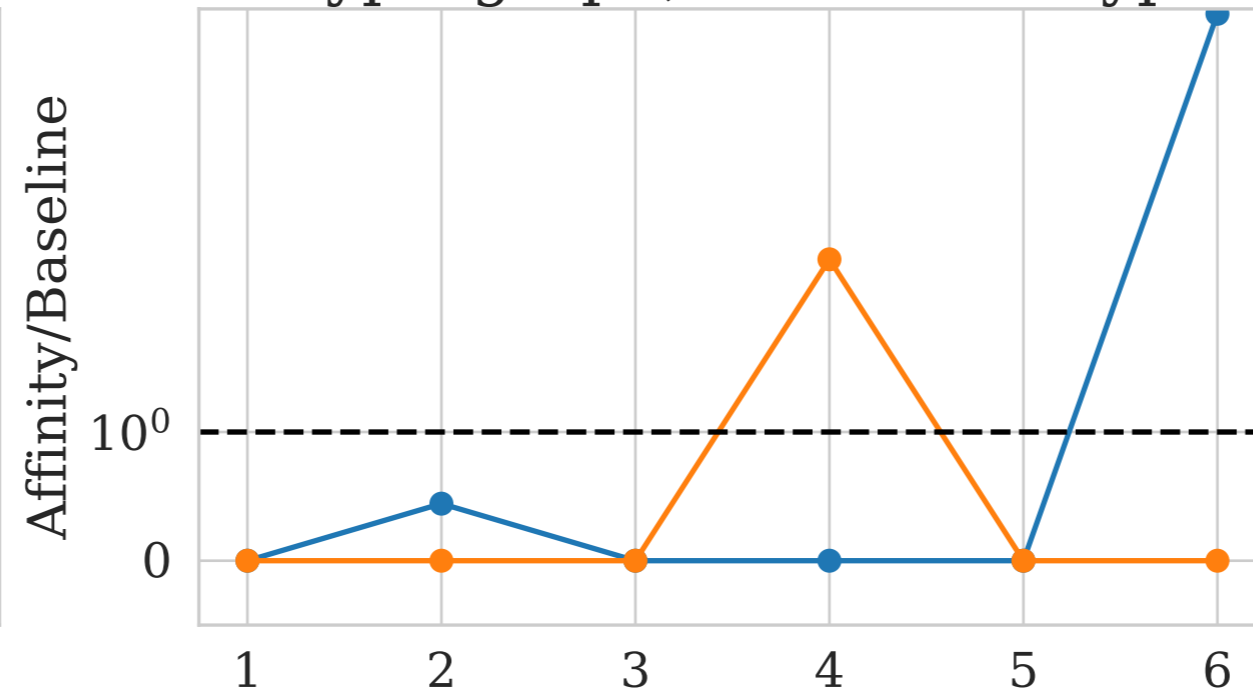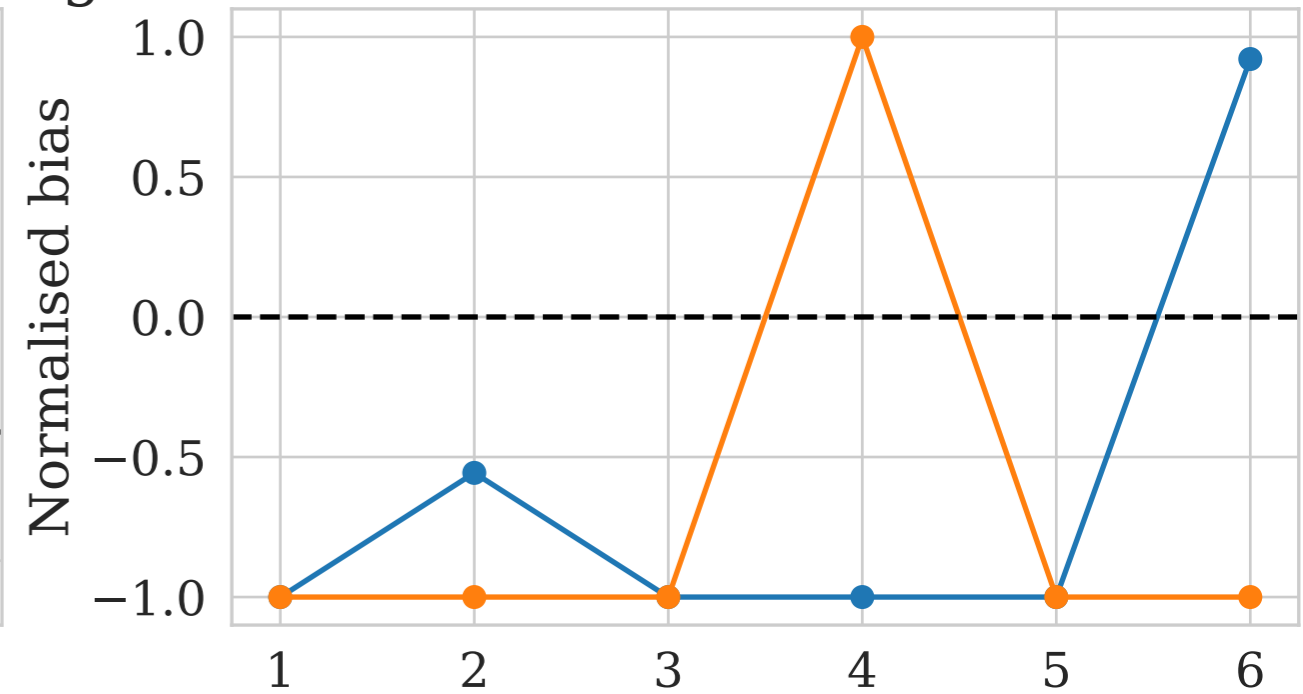

Class 0 Class 1

120-uniform hypergraph, number of hyperedges: 4

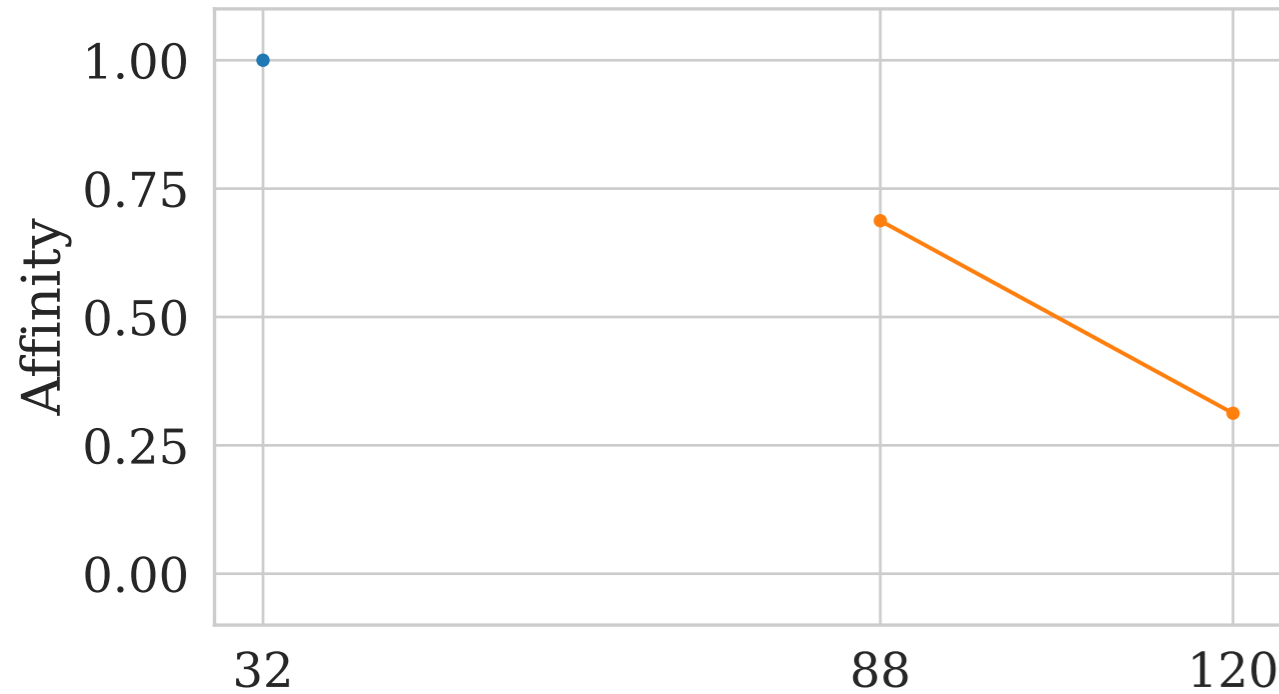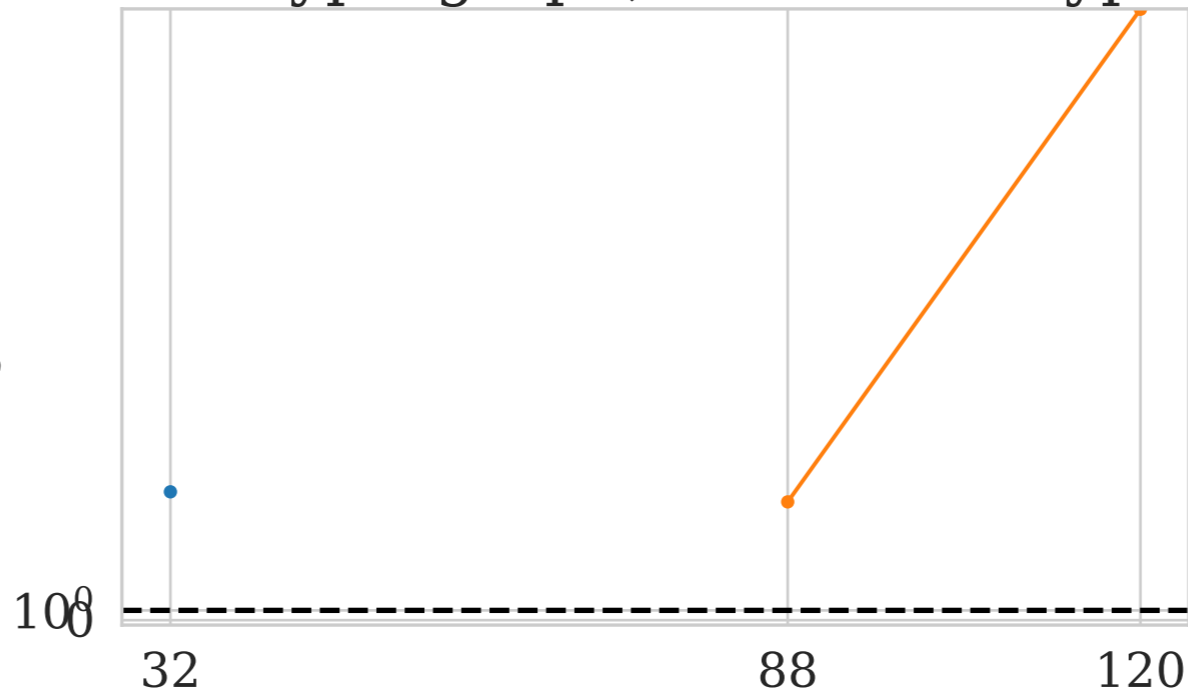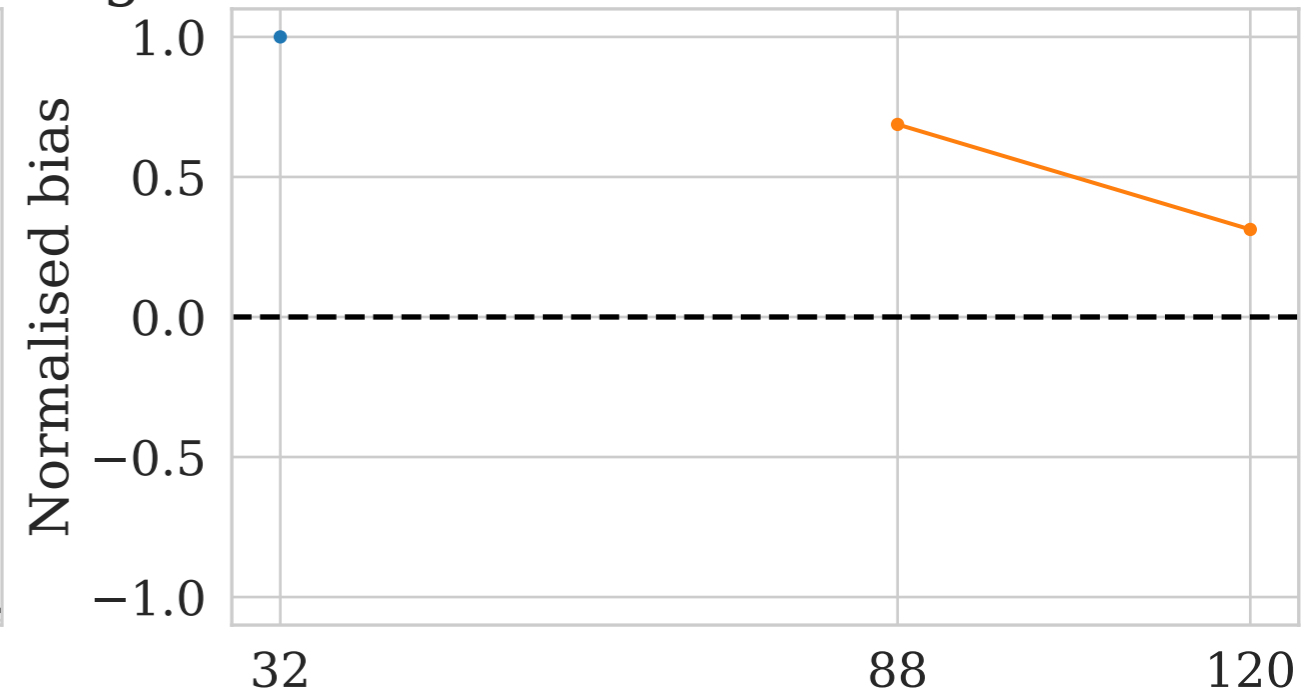

Class 0 Class 1

156-uniform hypergraph, number of hyperedges: 4

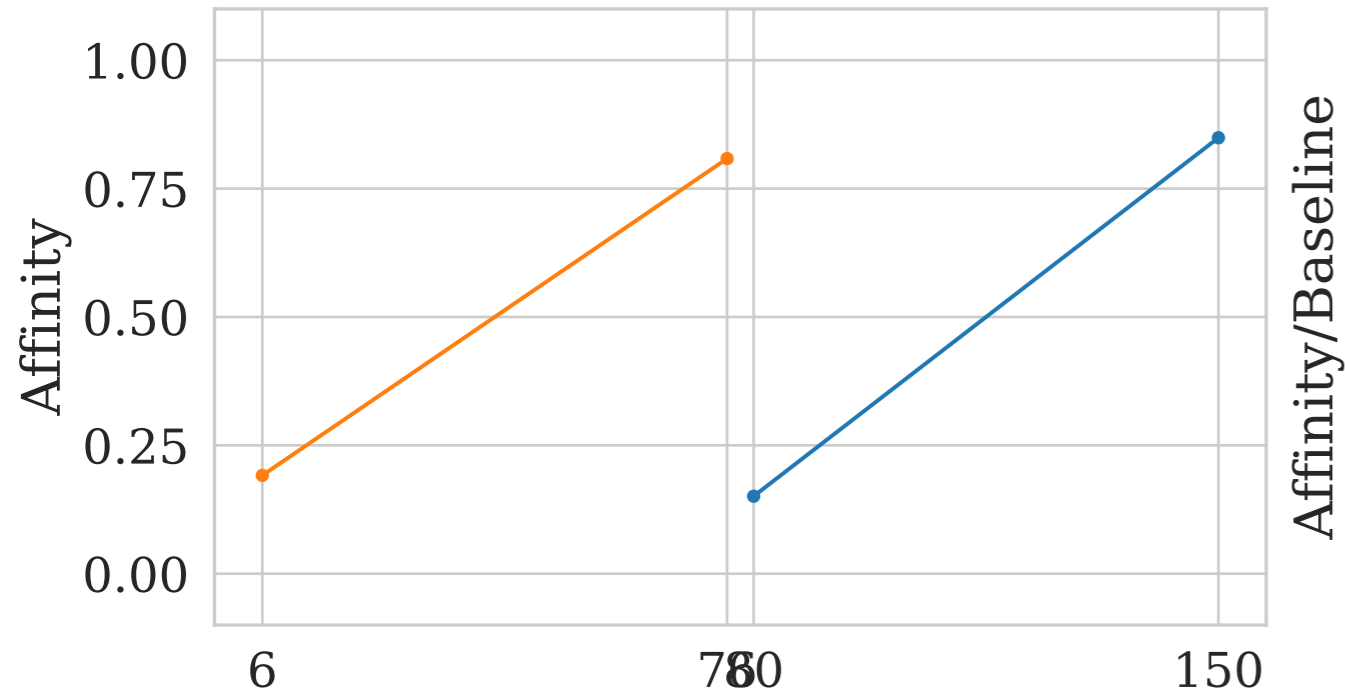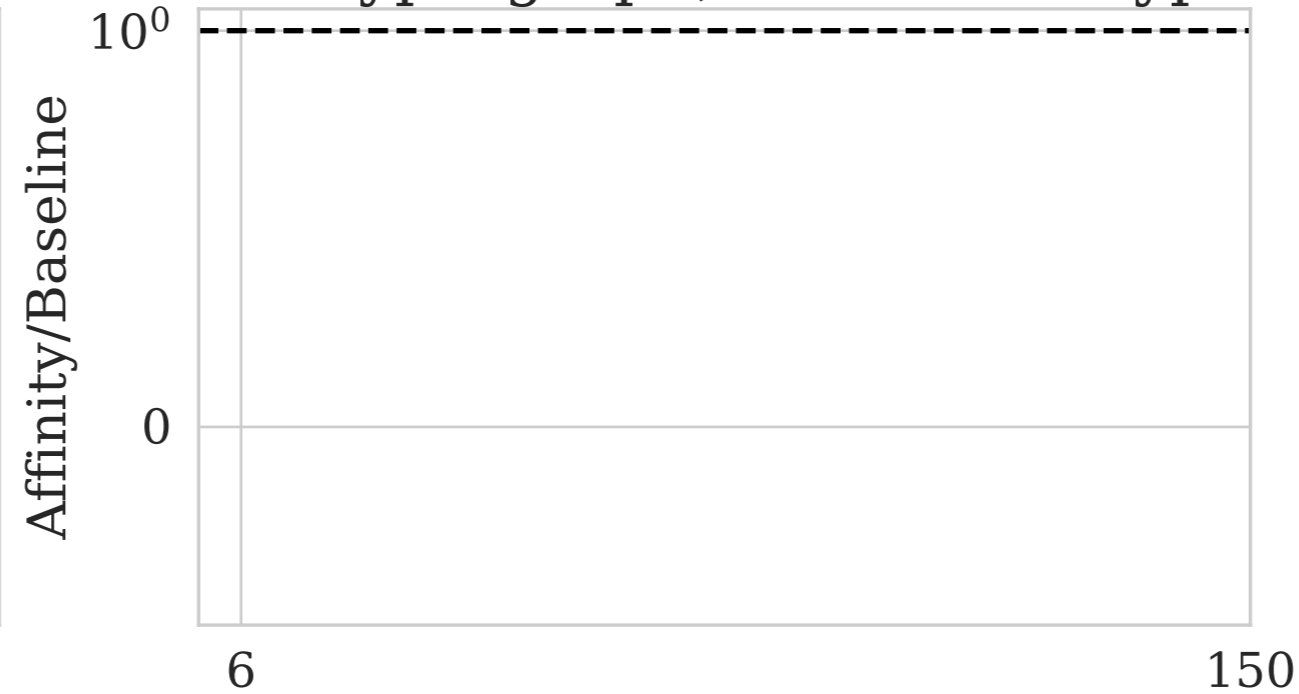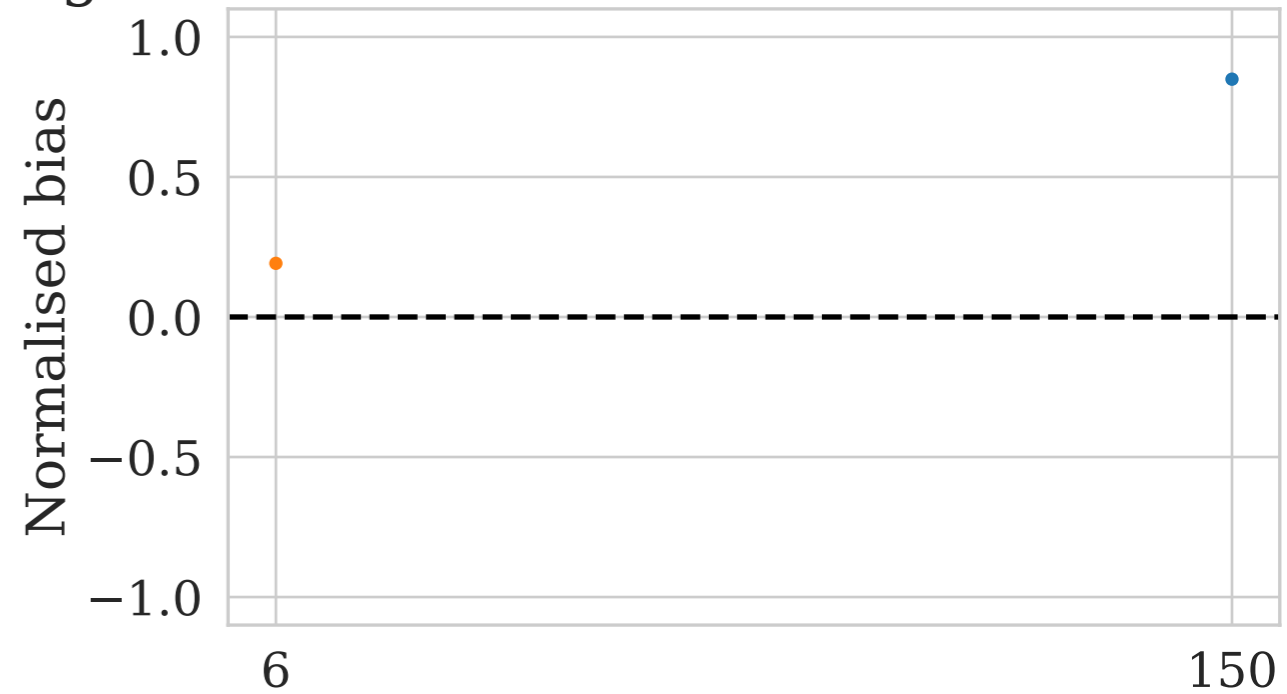

Class 0 Class 1

384-uniform hypergraph, number of hyperedges: 3

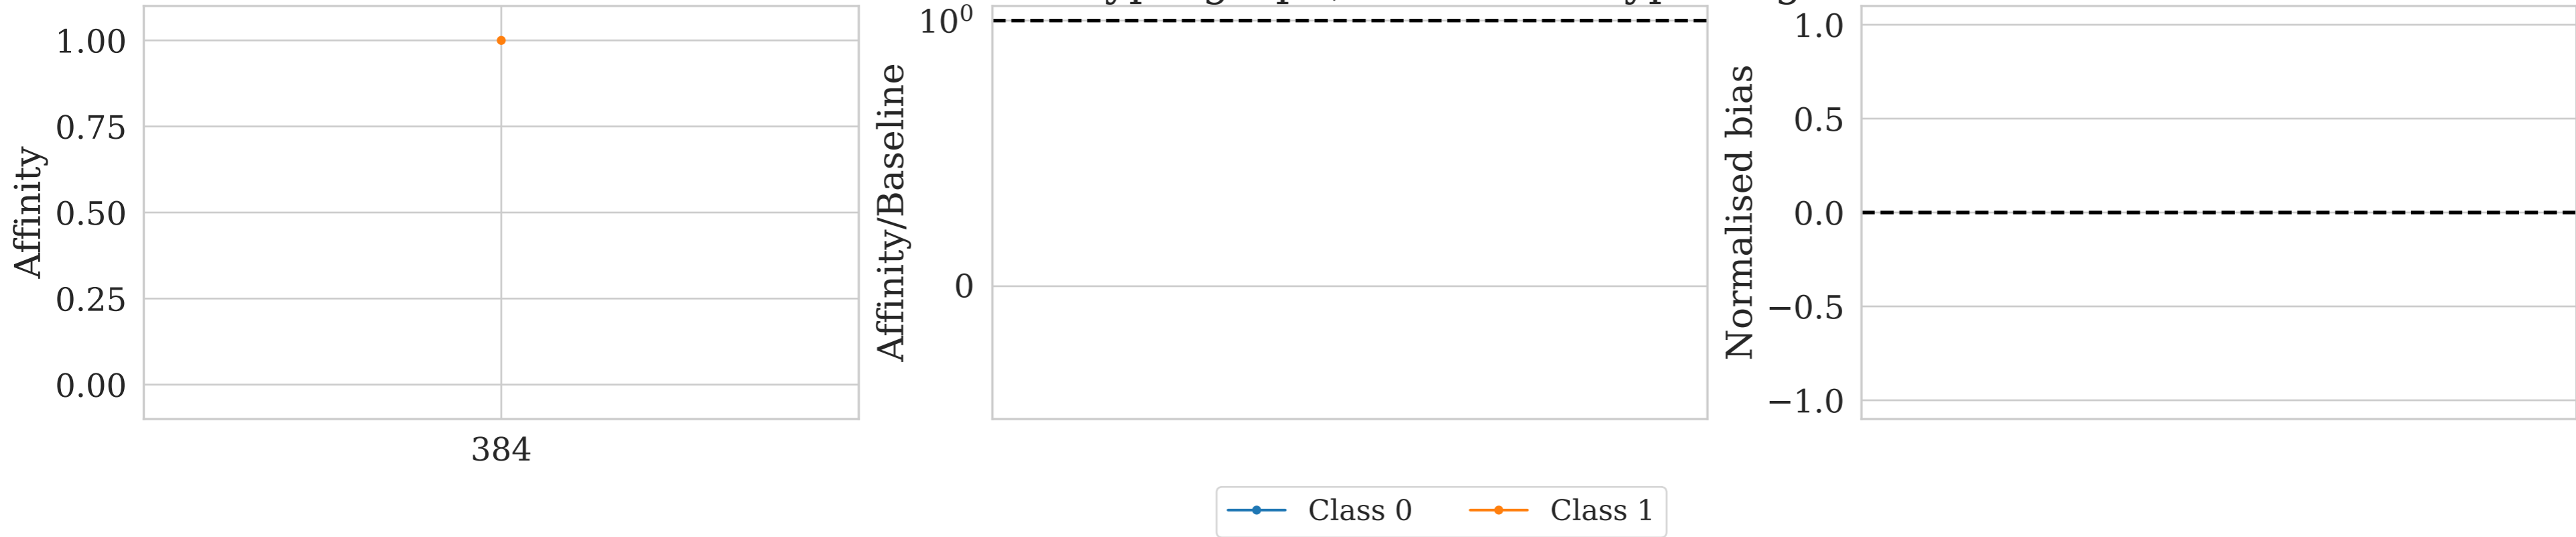

216-uniform hypergraph, number of hyperedges: 3

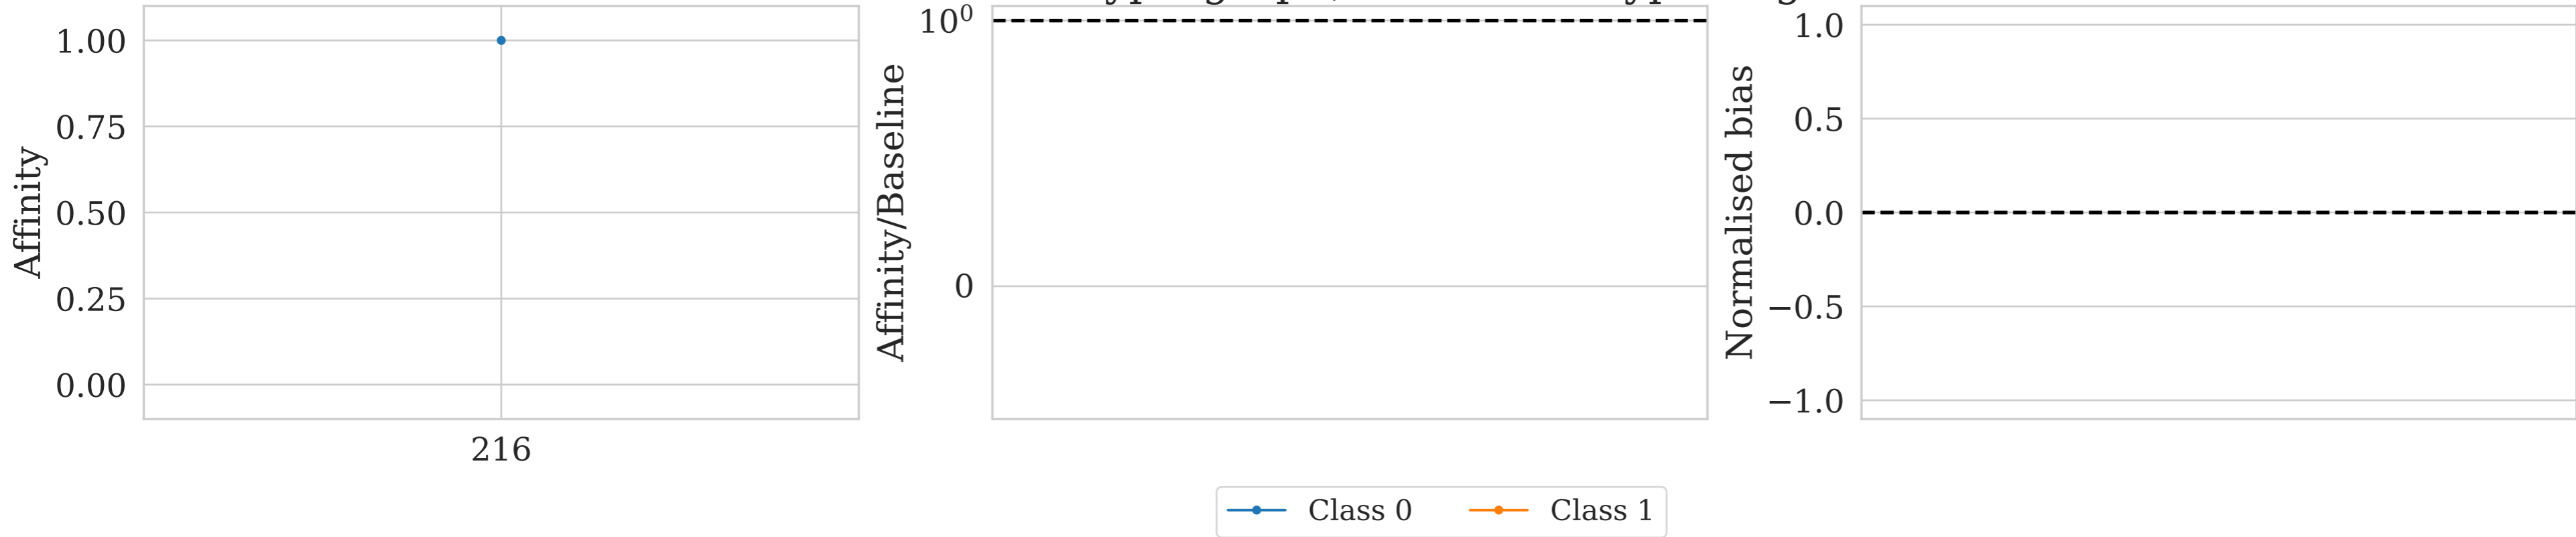

56-uniform hypergraph, number of hyperedges: 3

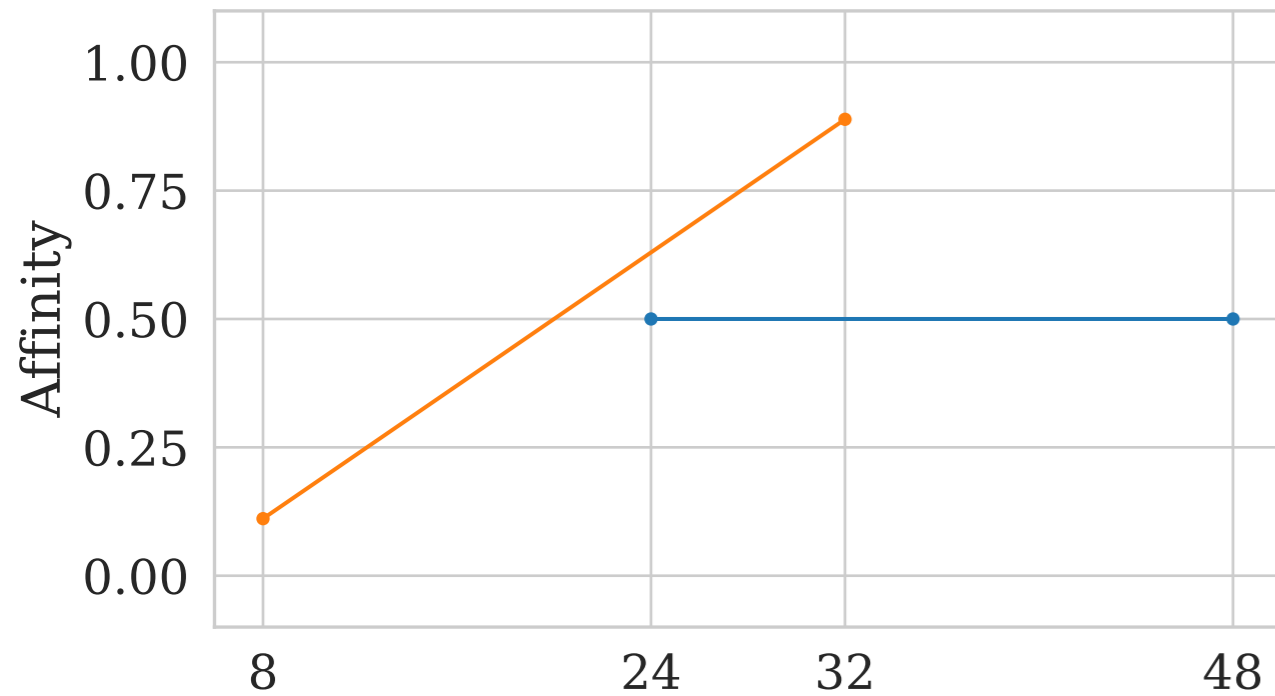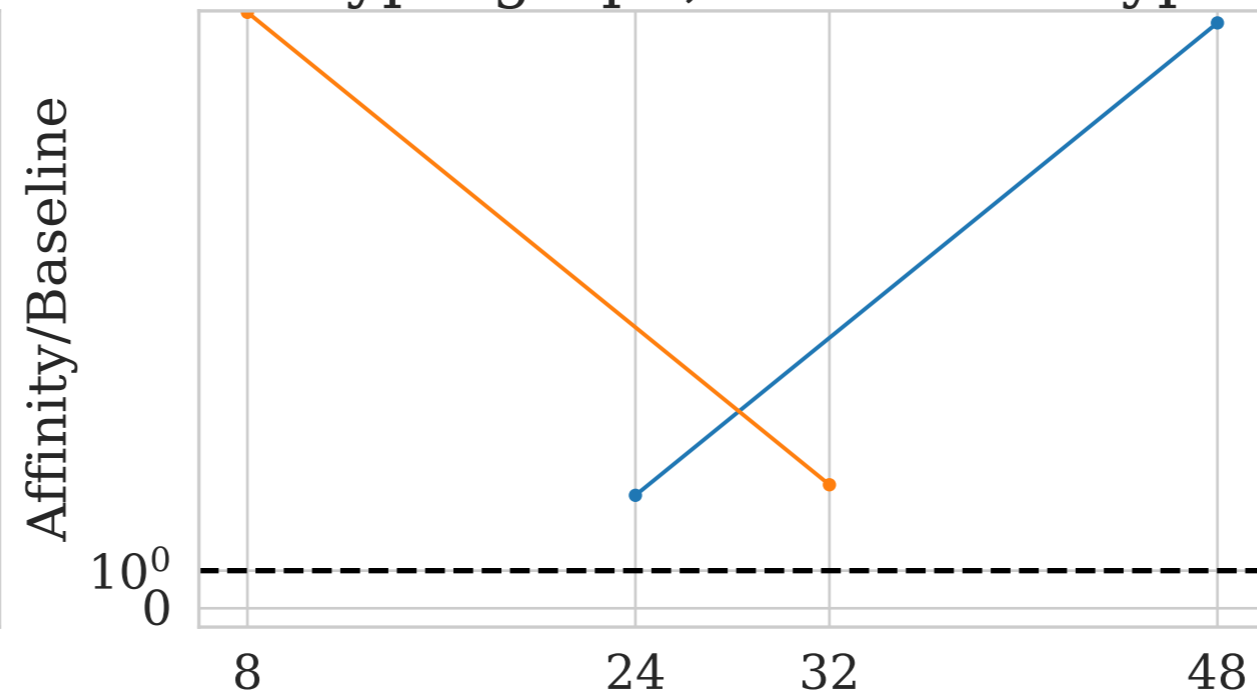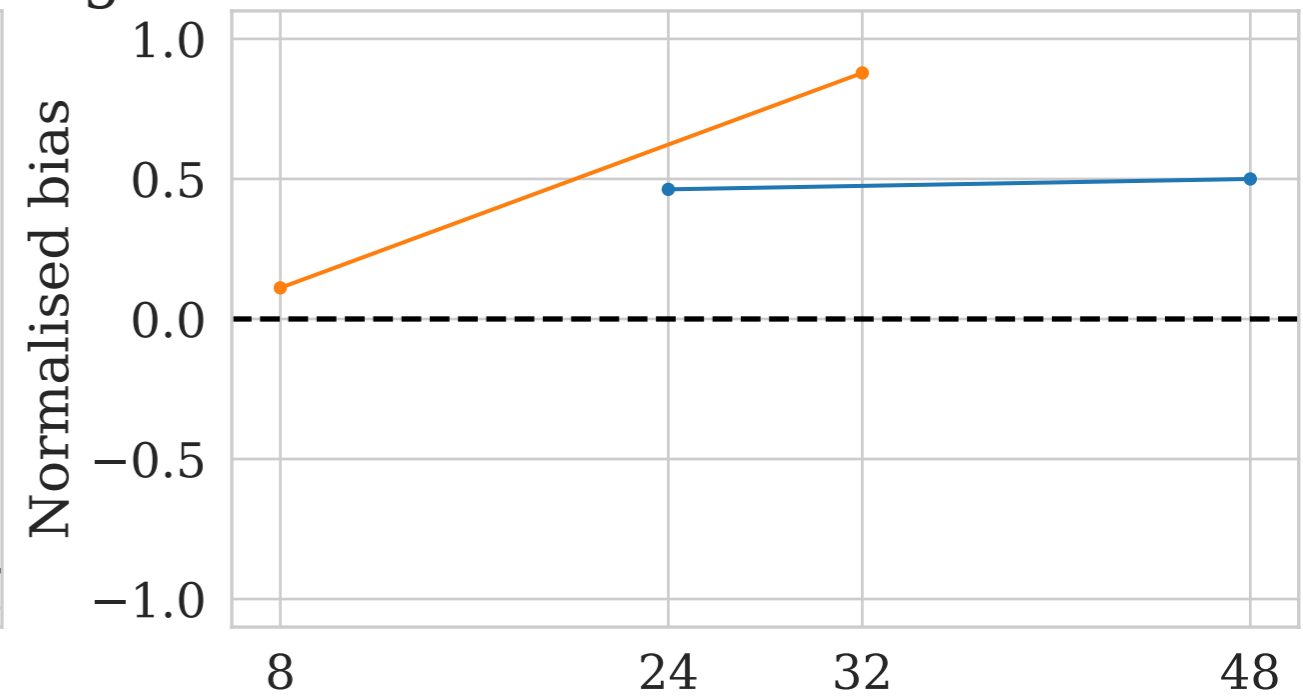

Class 0 Class 1

50-uniform hypergraph, number of hyperedges: 3

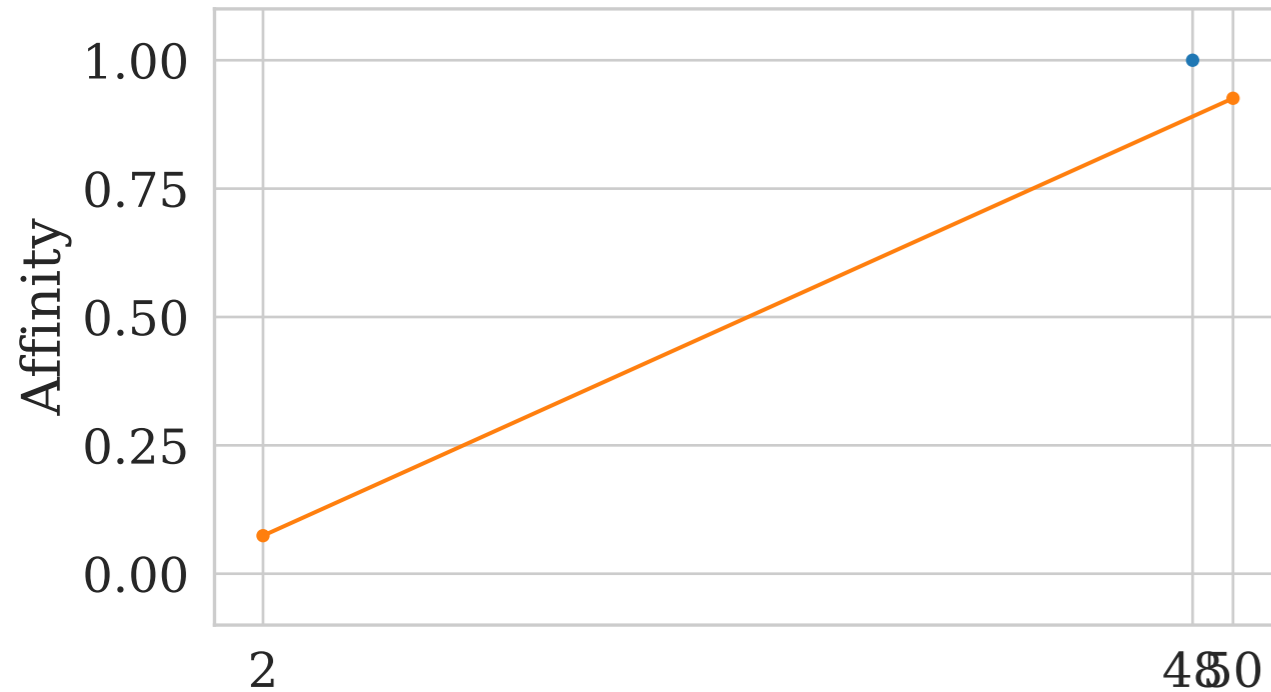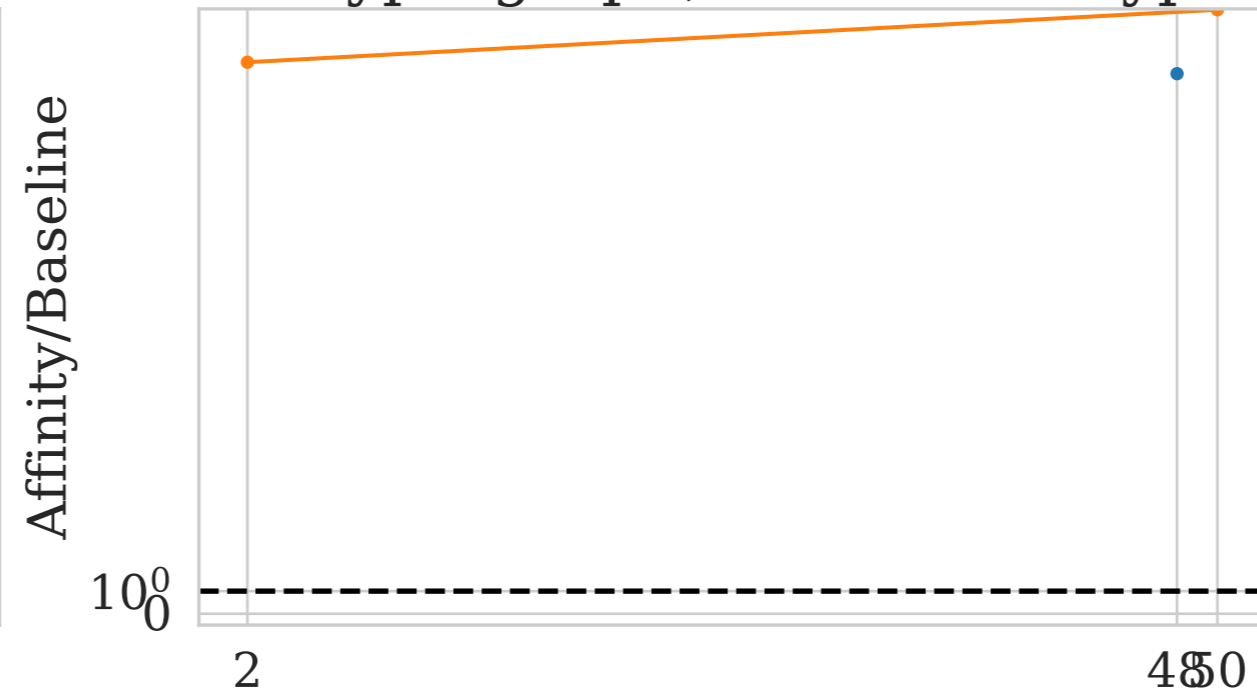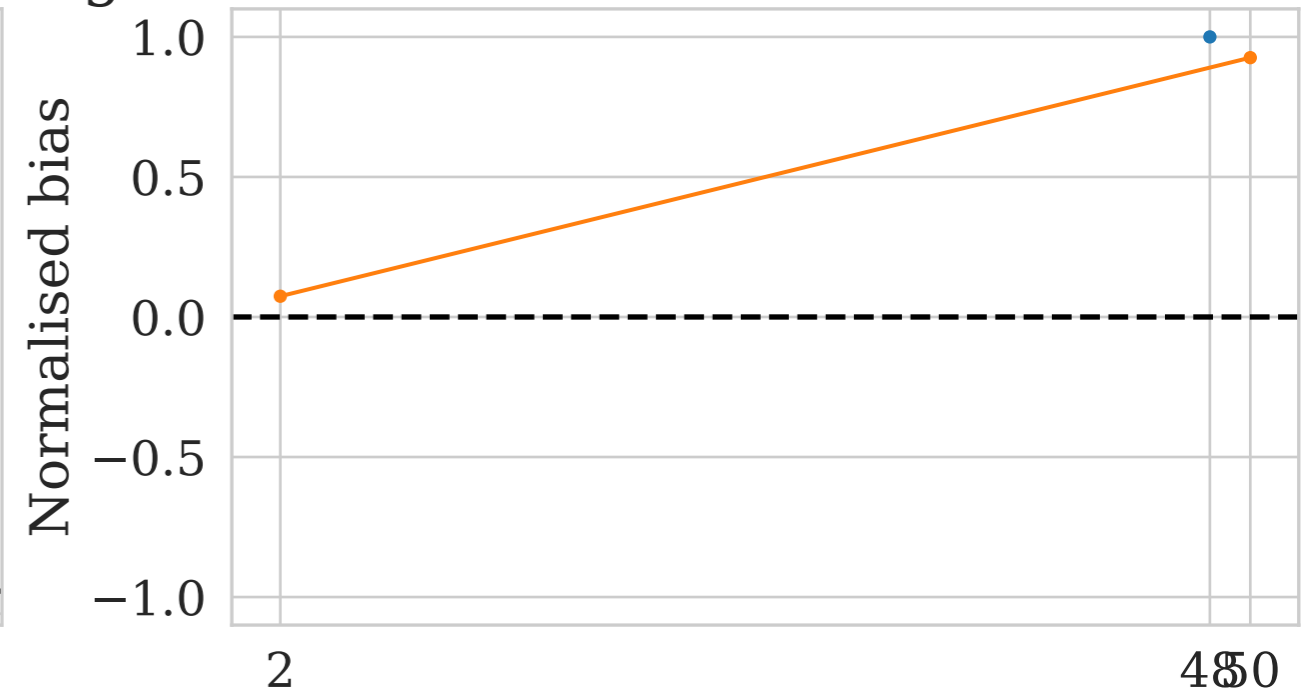

Class 0 Class 1

88-uniform hypergraph, number of hyperedges: 3

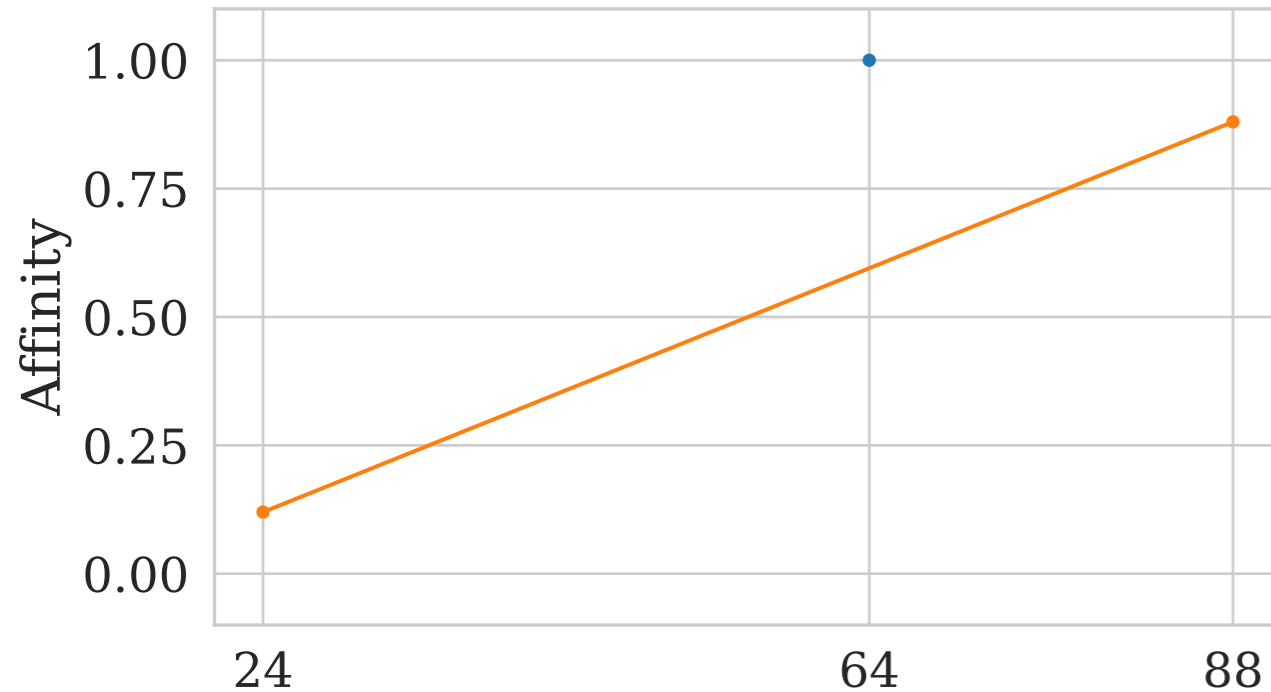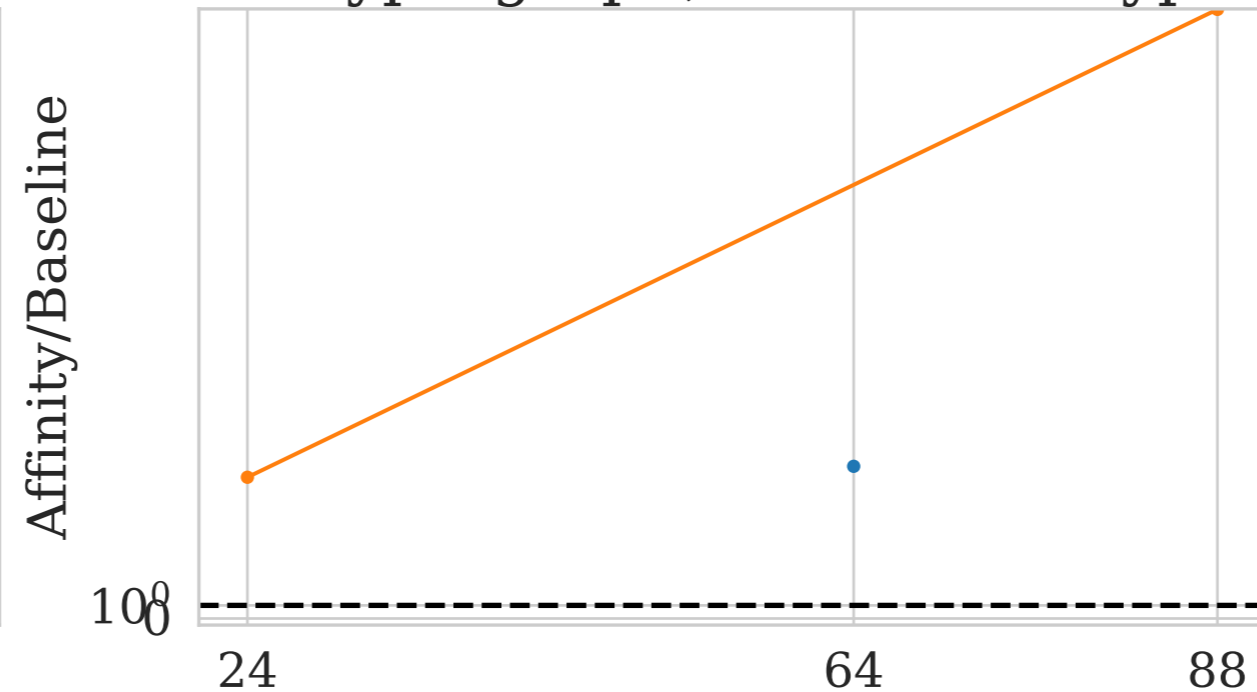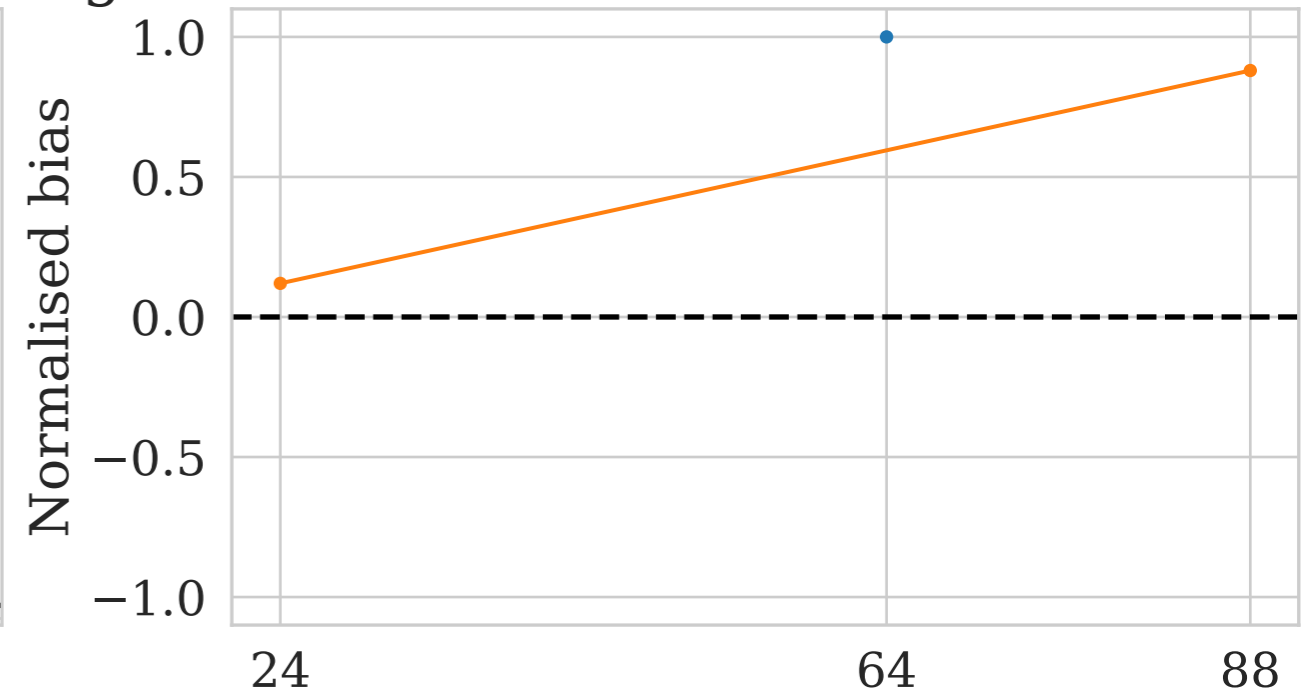

Class 0 Class 1

112-uniform hypergraph, number of hyperedges: 3

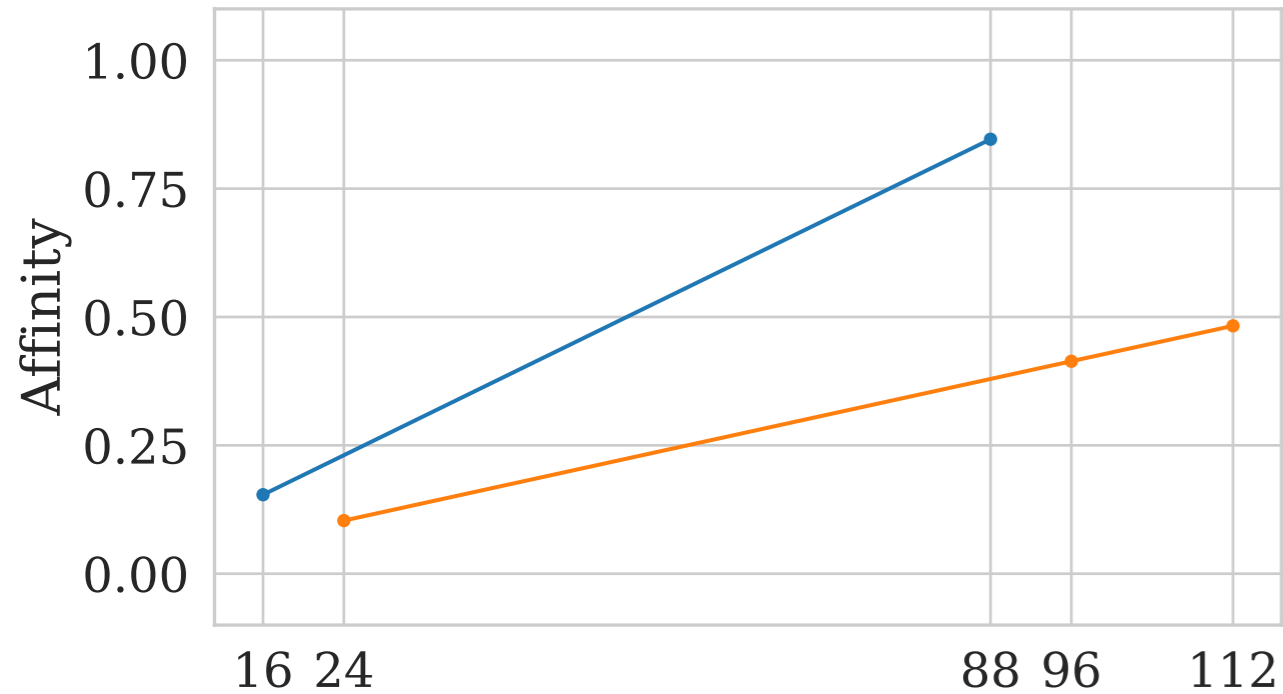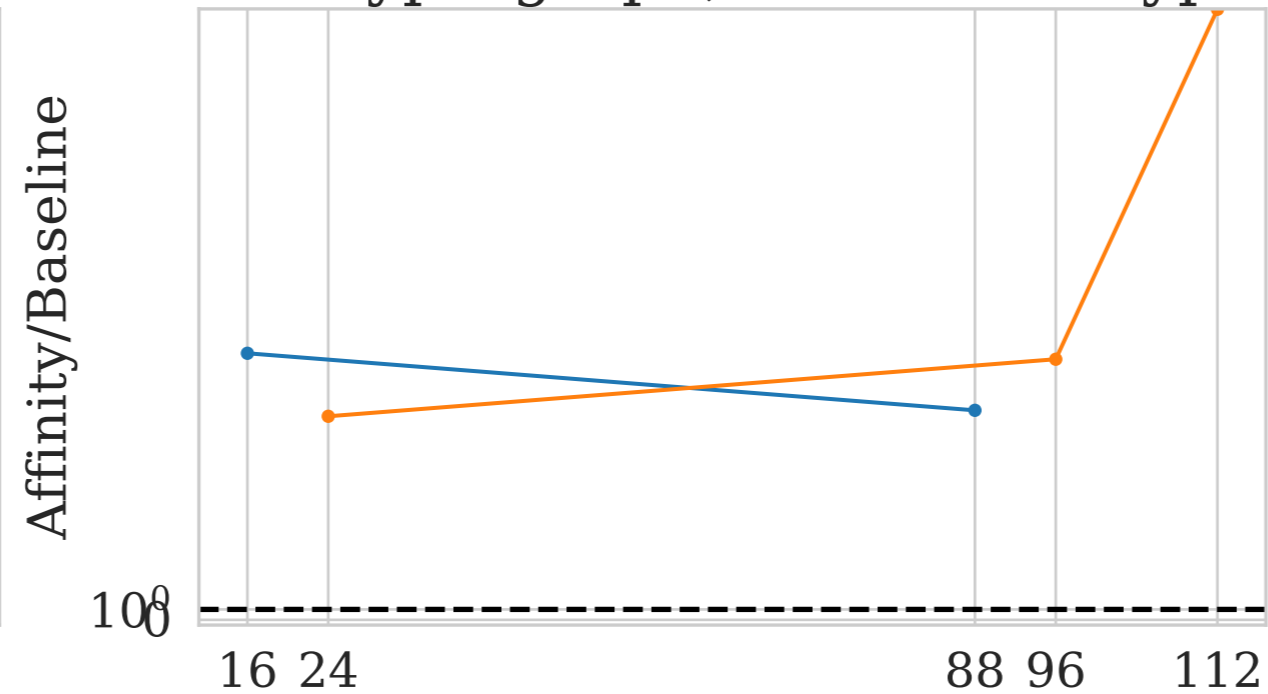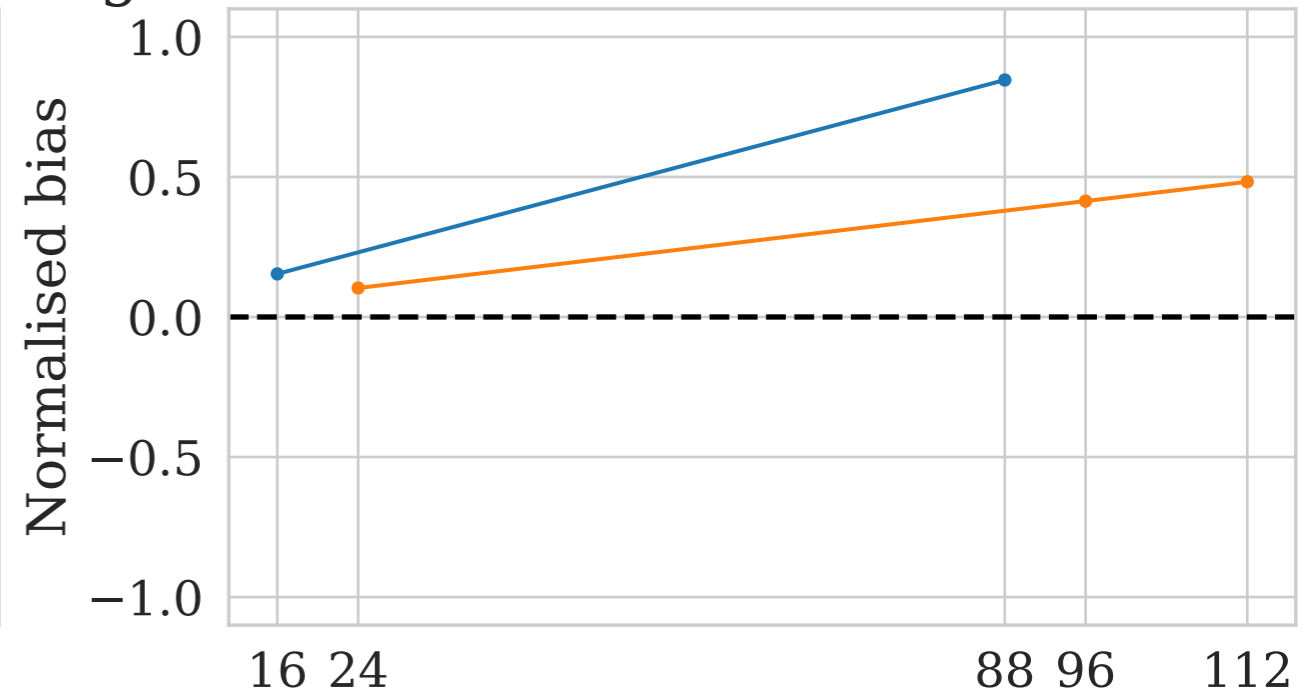

Class 0 Class 1

164-uniform hypergraph, number of hyperedges: 3

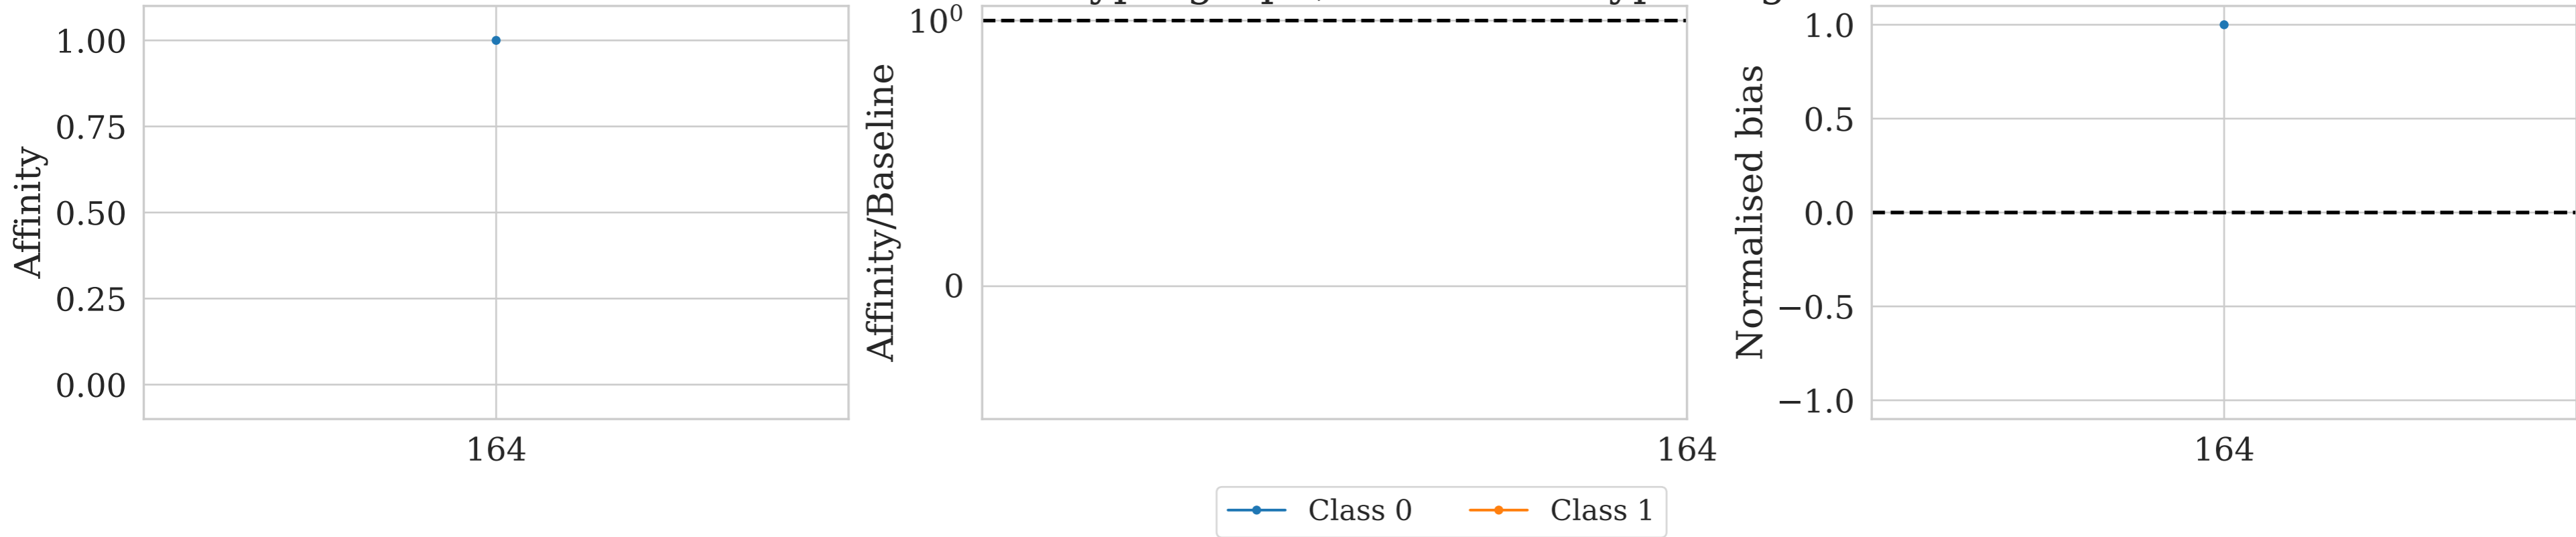

148-uniform hypergraph, number of hyperedges: 3

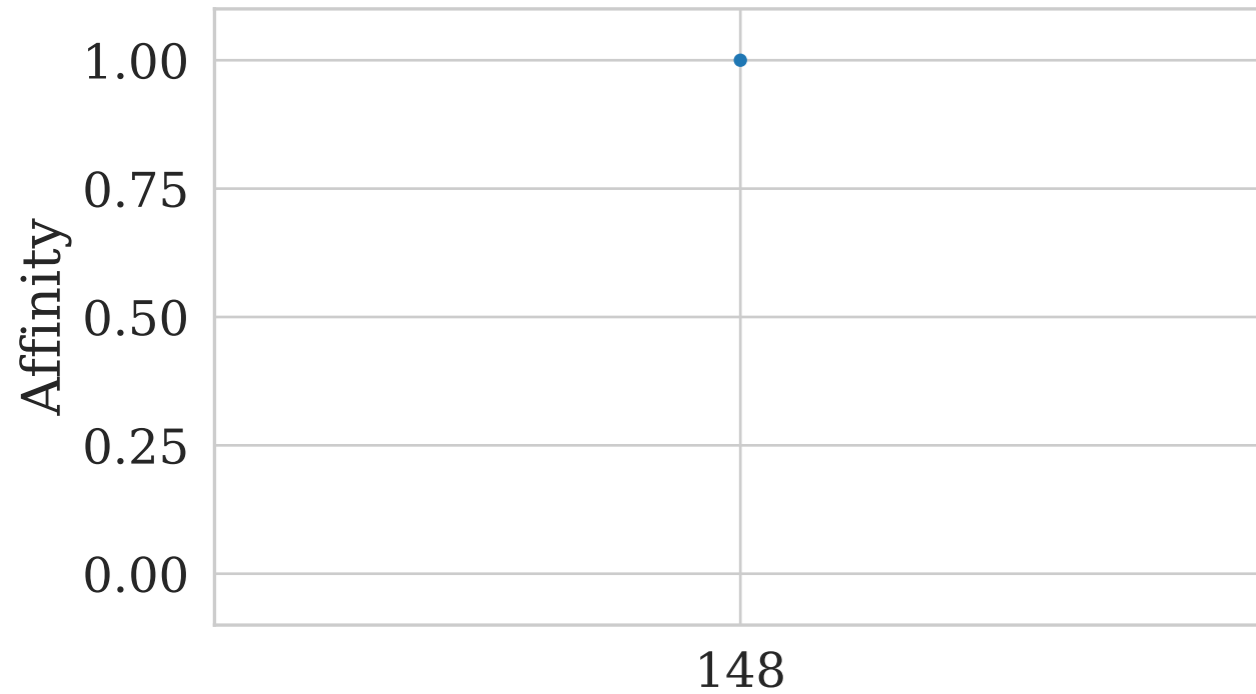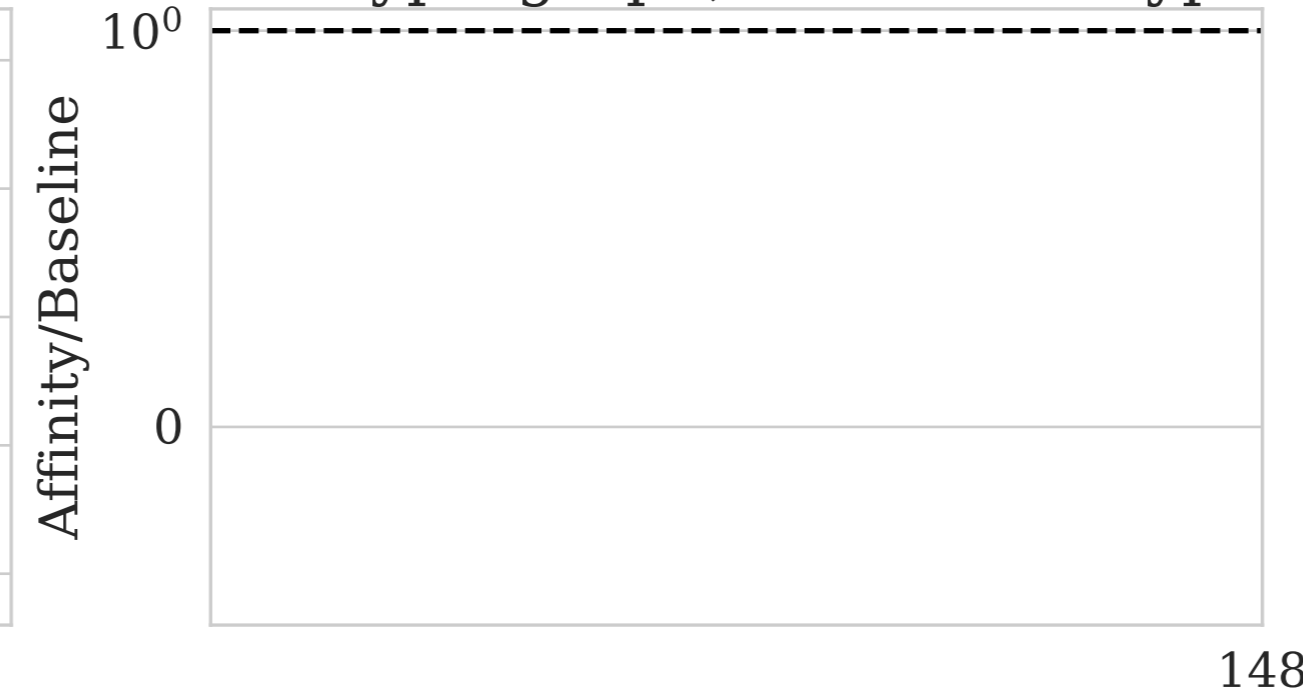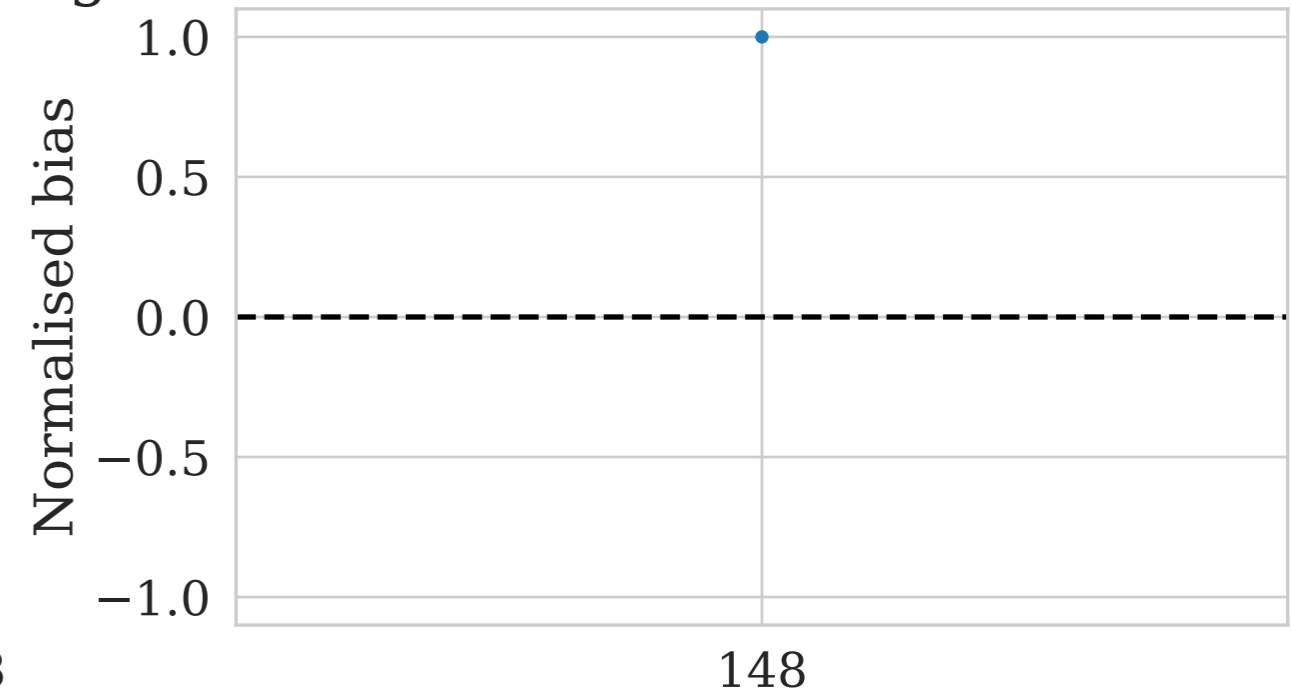

Class 0    Class 1

288-uniform hypergraph, number of hyperedges: 3

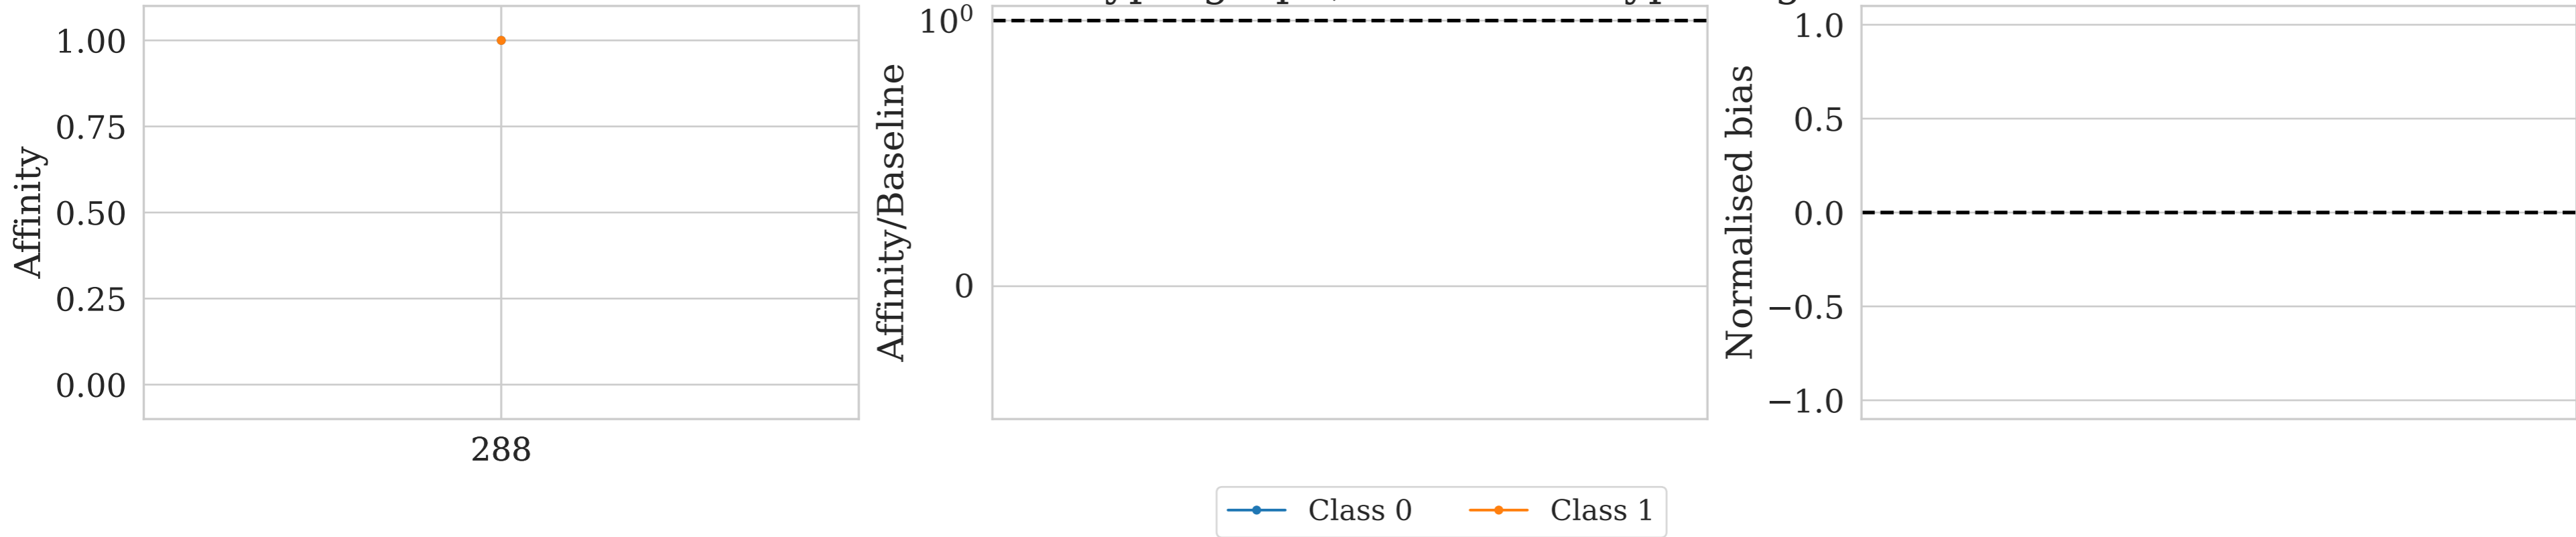

10-uniform hypergraph, number of hyperedges: 2

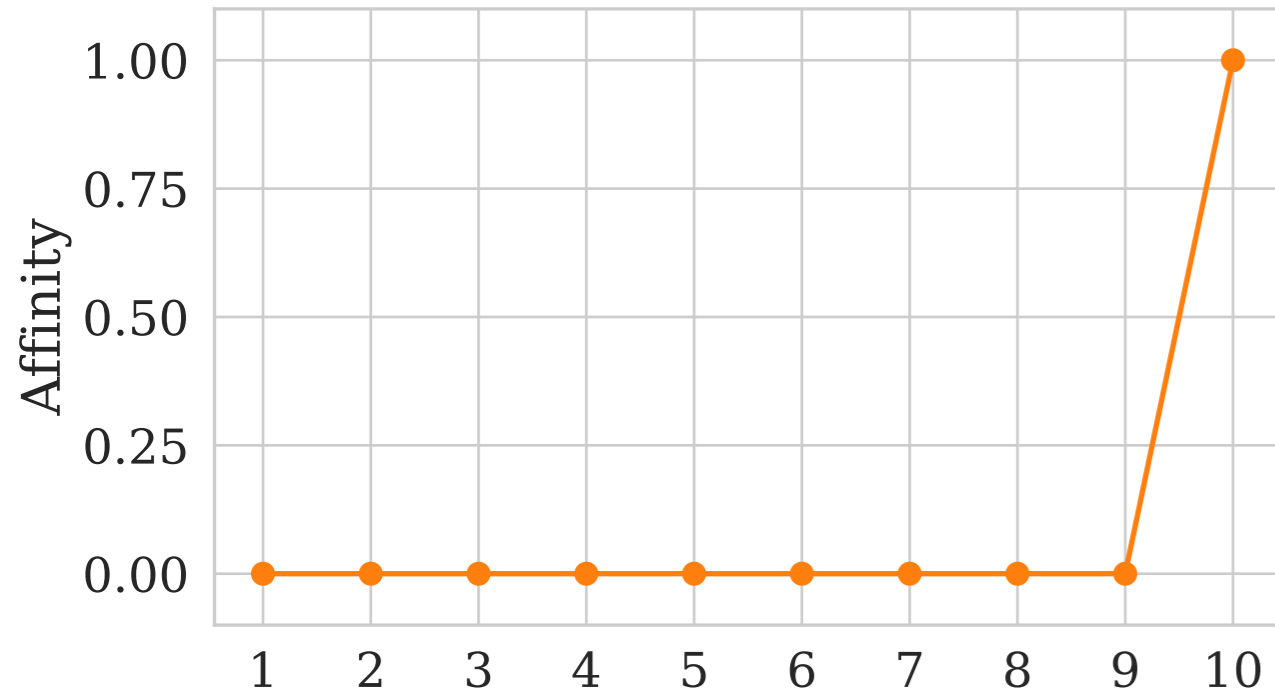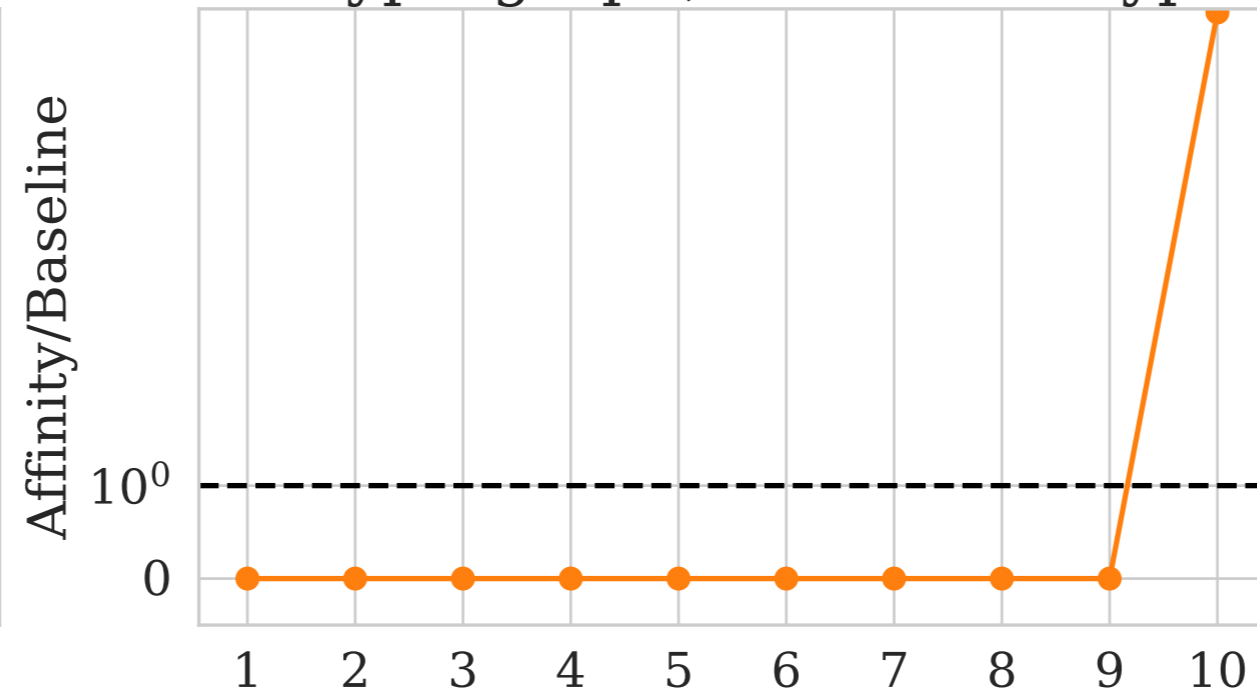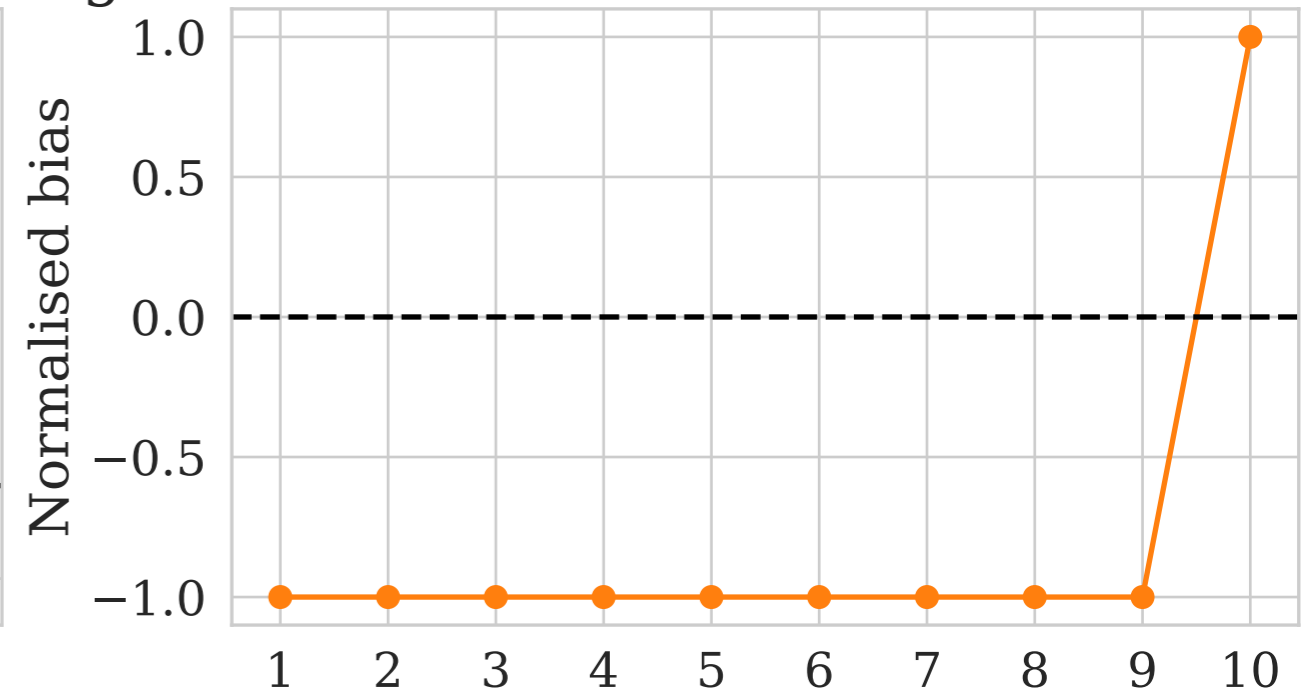

Class 0 Class 1

146-uniform hypergraph, number of hyperedges: 2

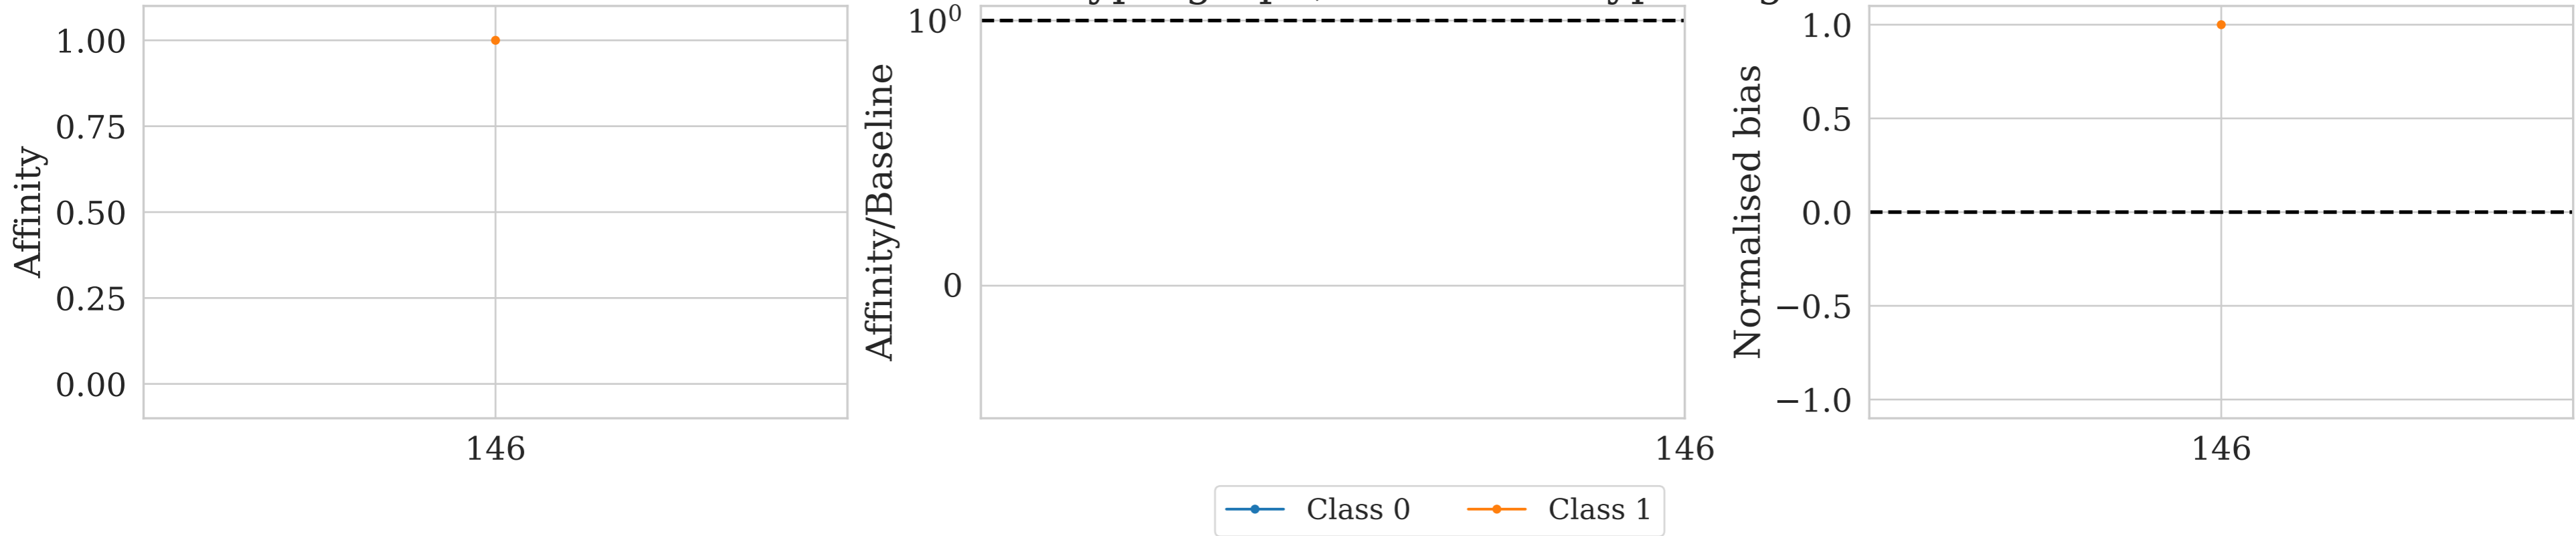

528-uniform hypergraph, number of hyperedges: 2

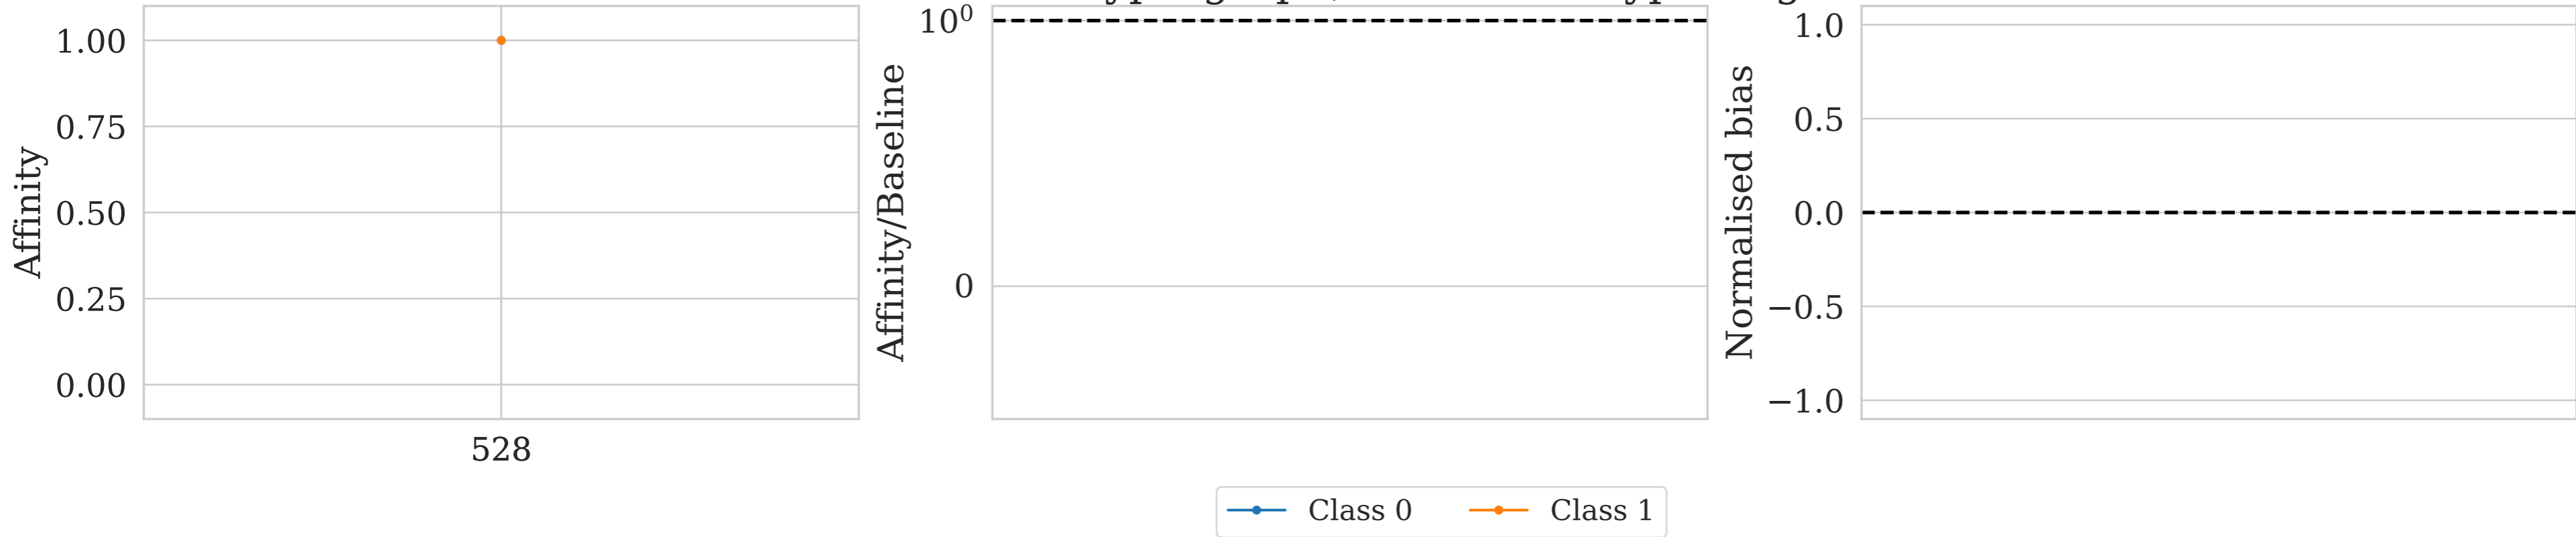

86-uniform hypergraph, number of hyperedges: 2

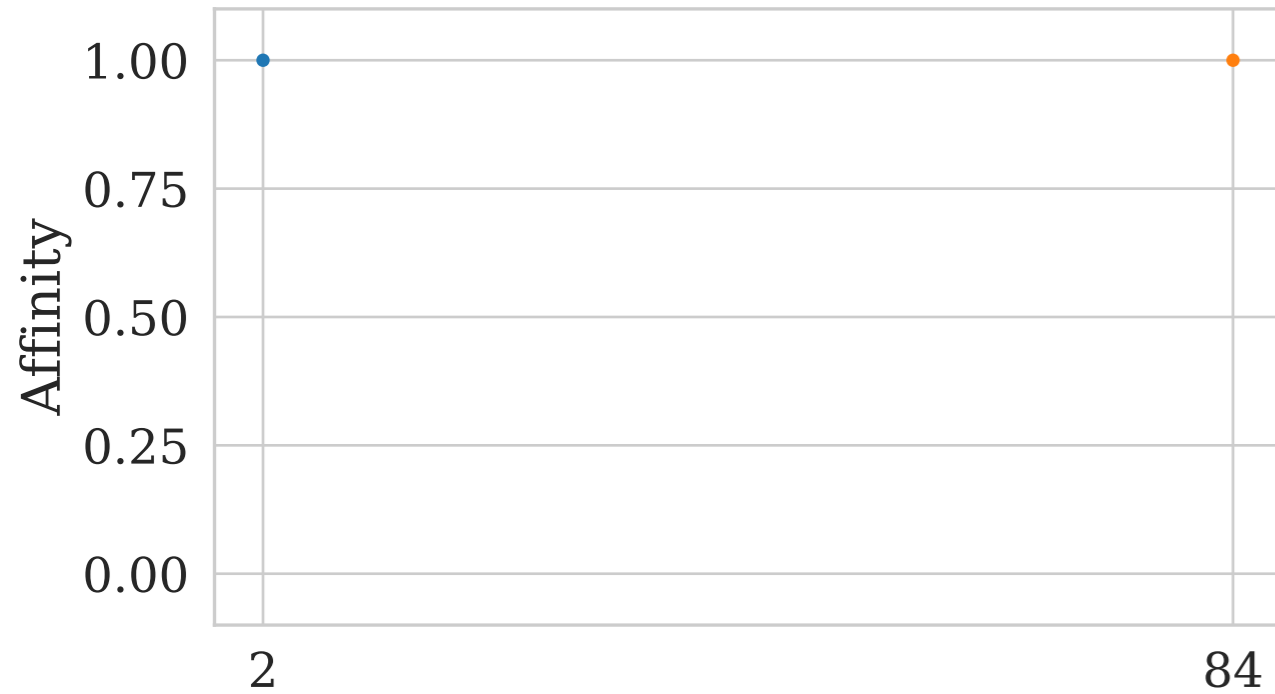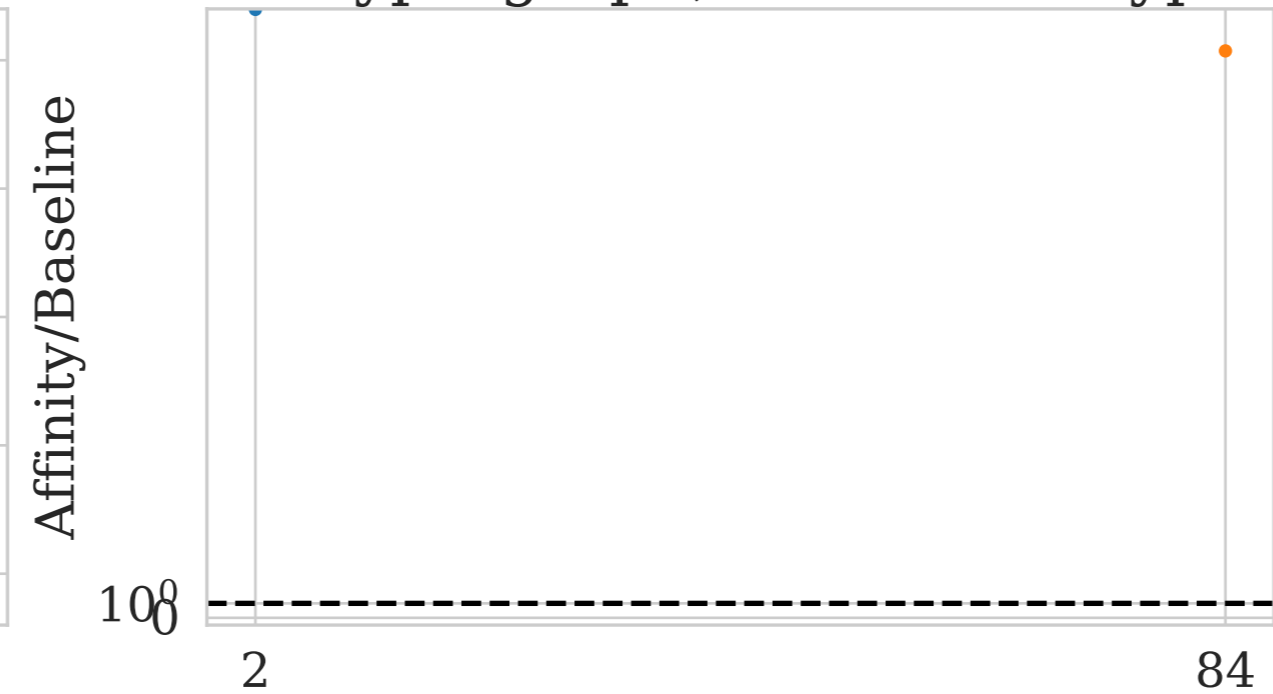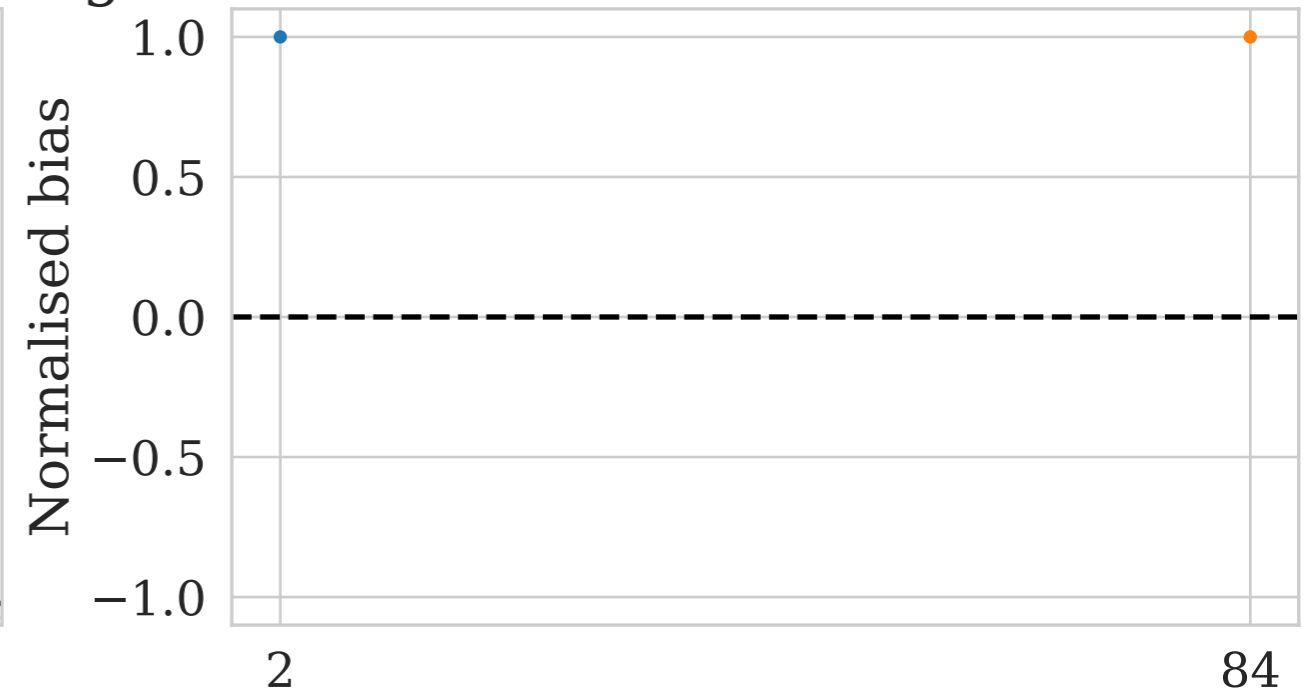

Class 0 Class 1

42-uniform hypergraph, number of hyperedges: 2

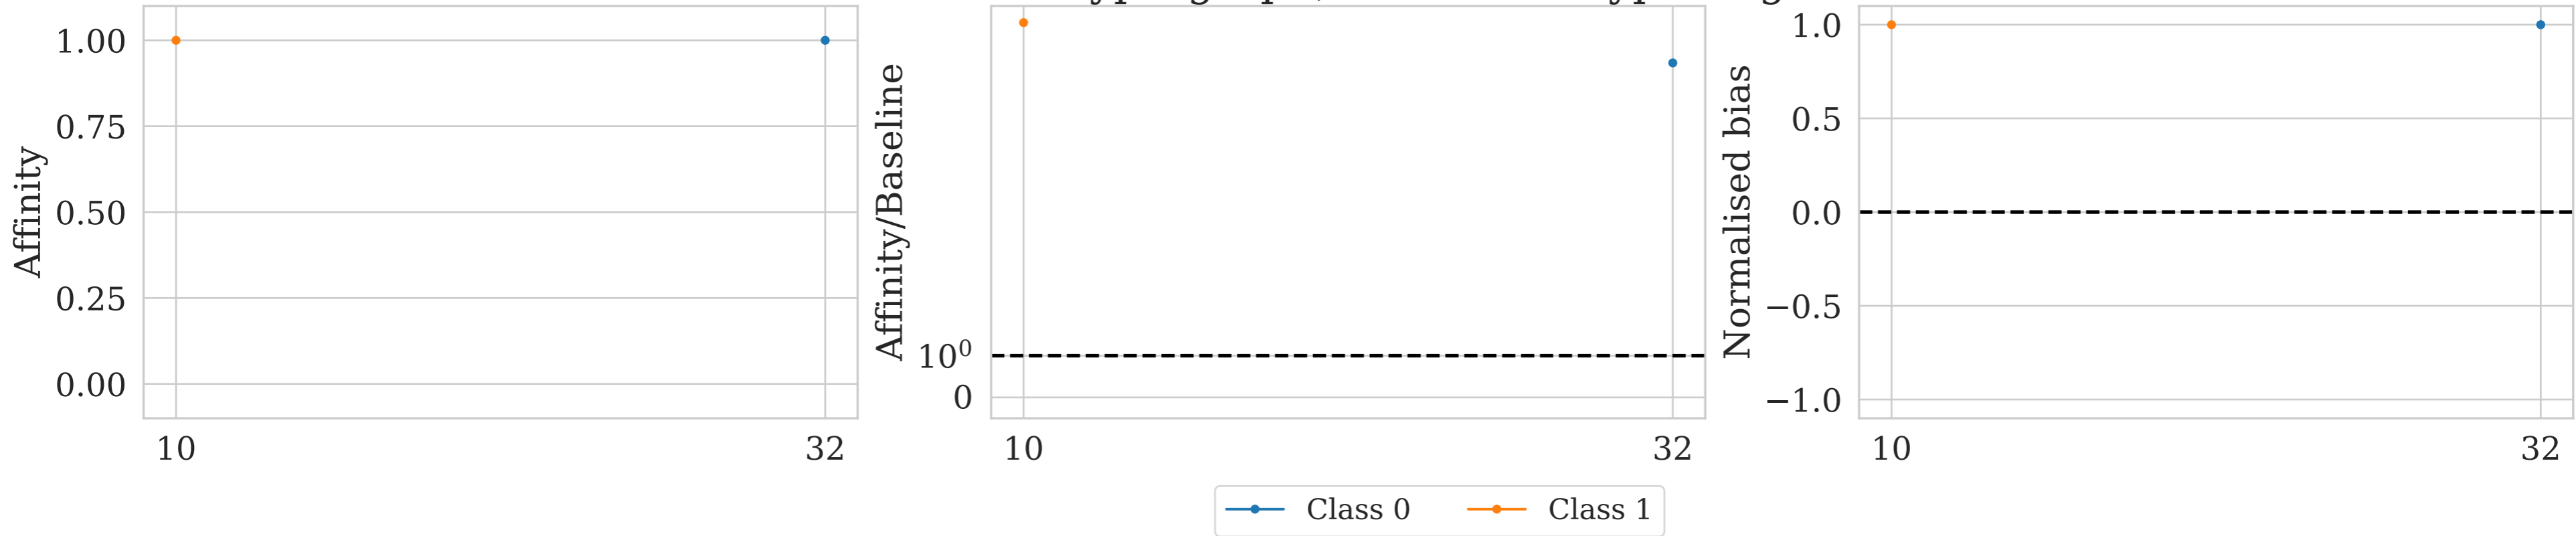

32-uniform hypergraph, number of hyperedges: 2

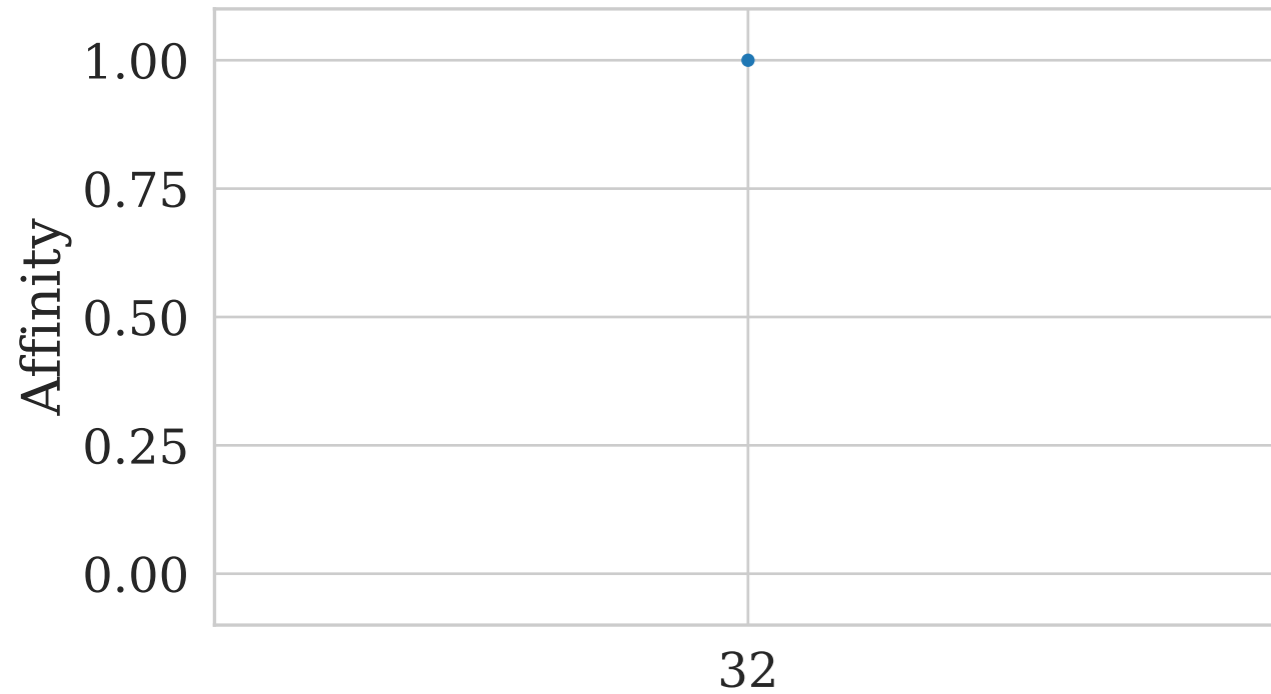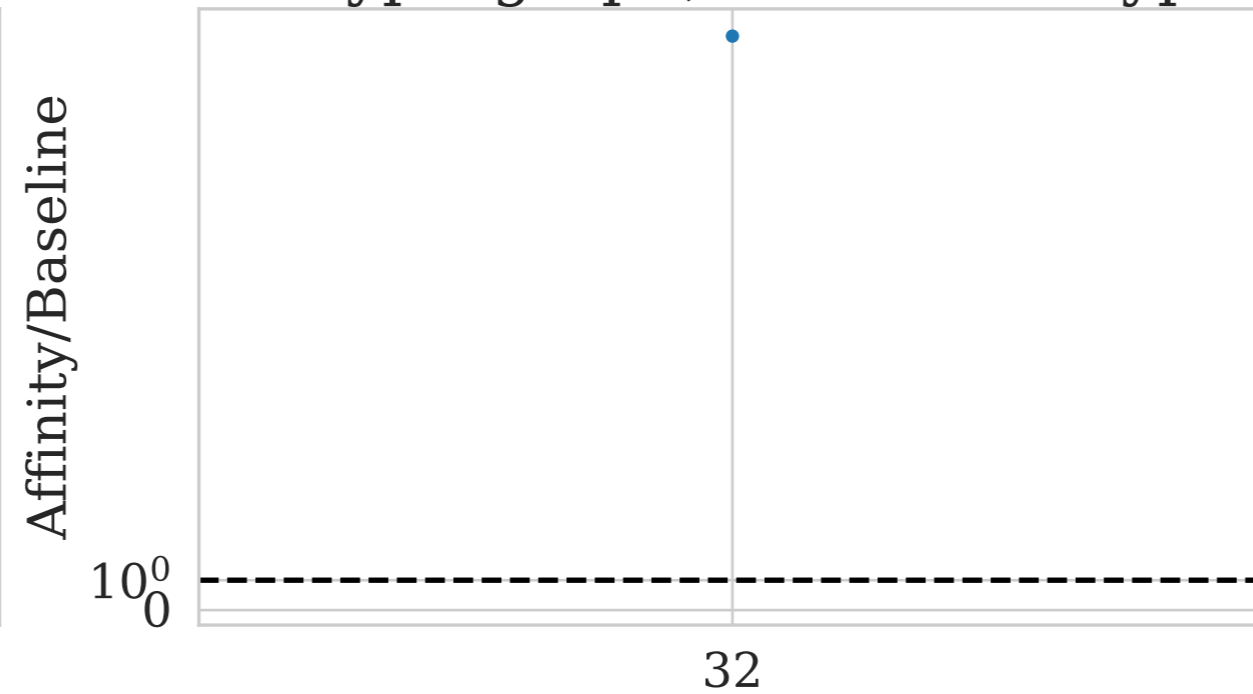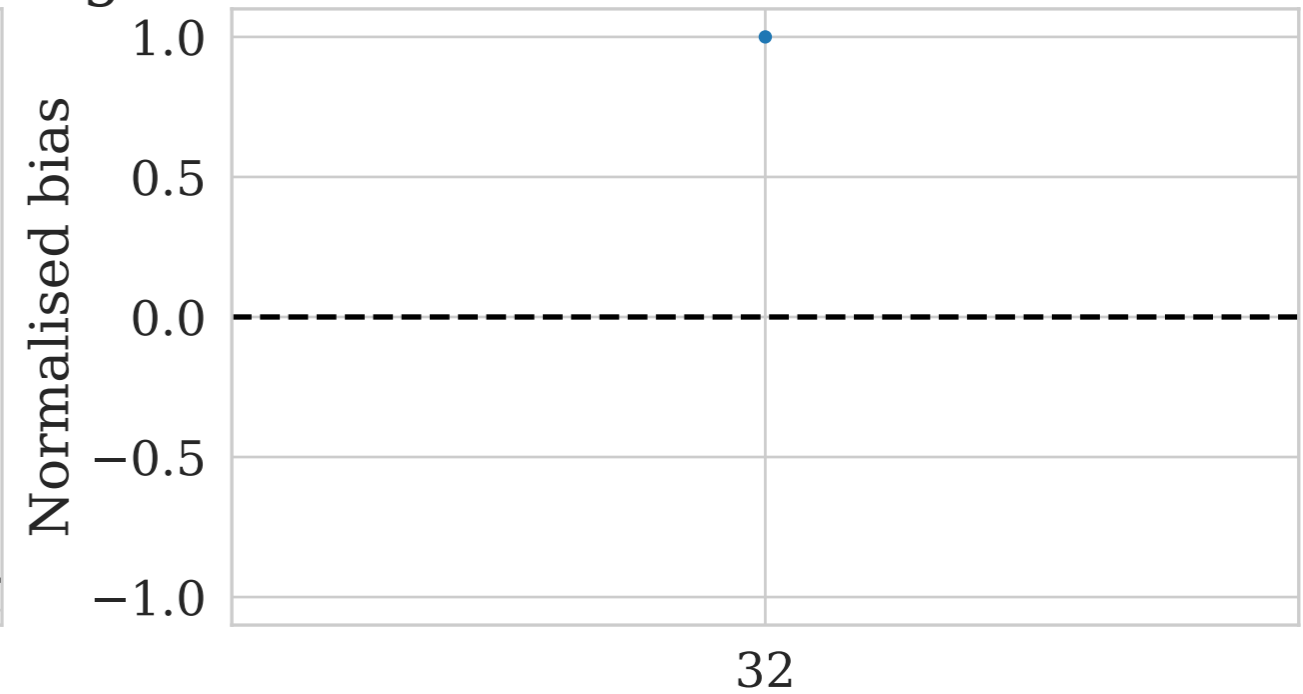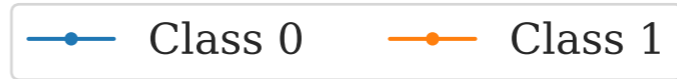

408-uniform hypergraph, number of hyperedges: 2

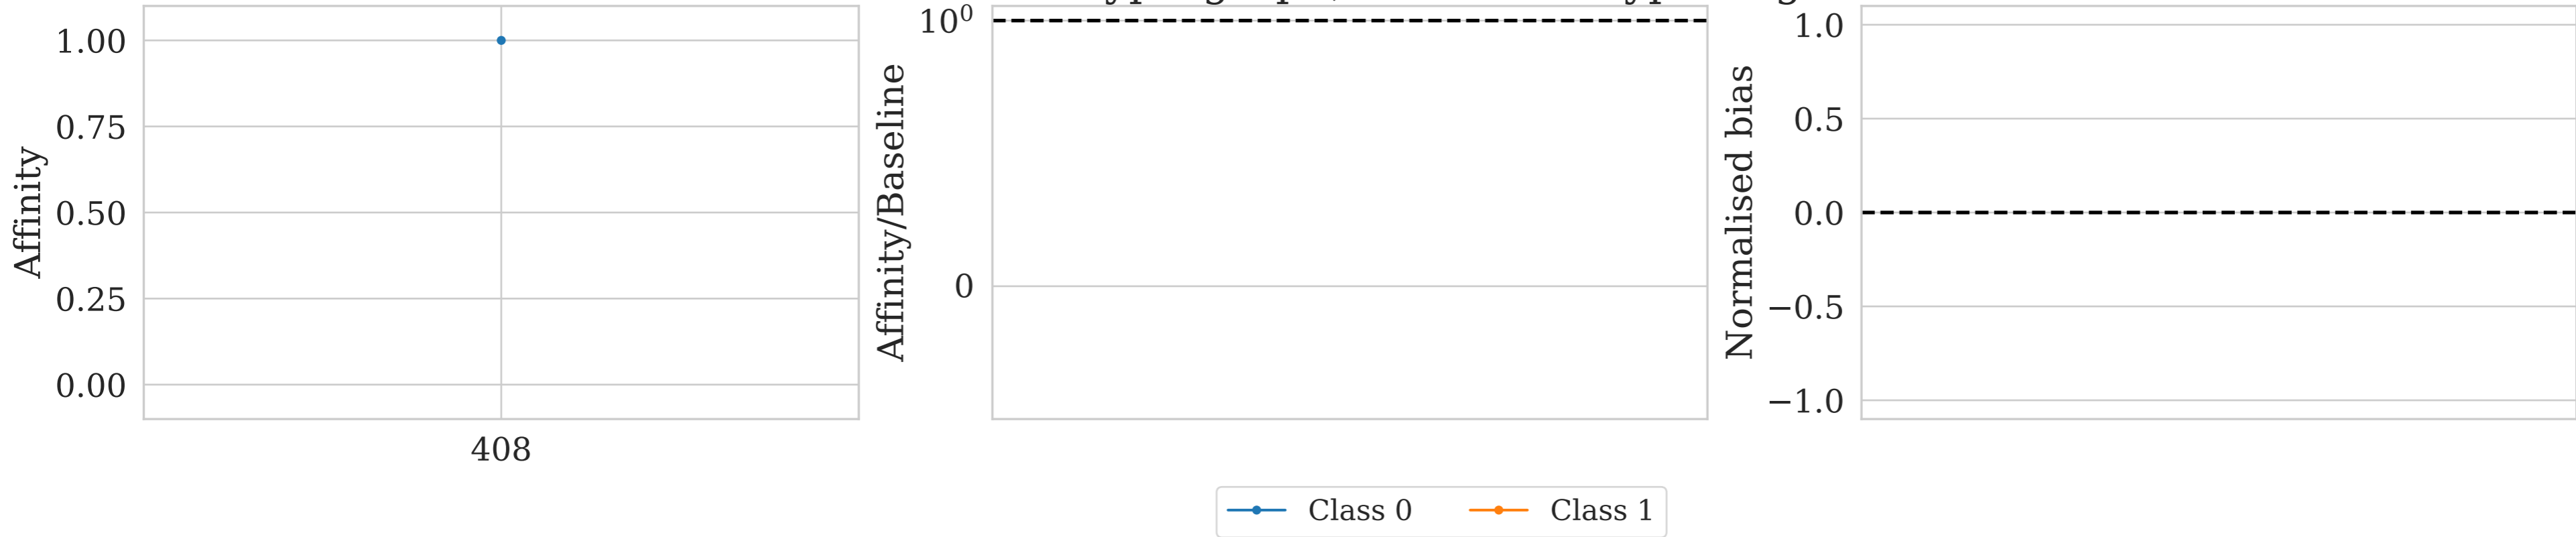

258-uniform hypergraph, number of hyperedges: 2

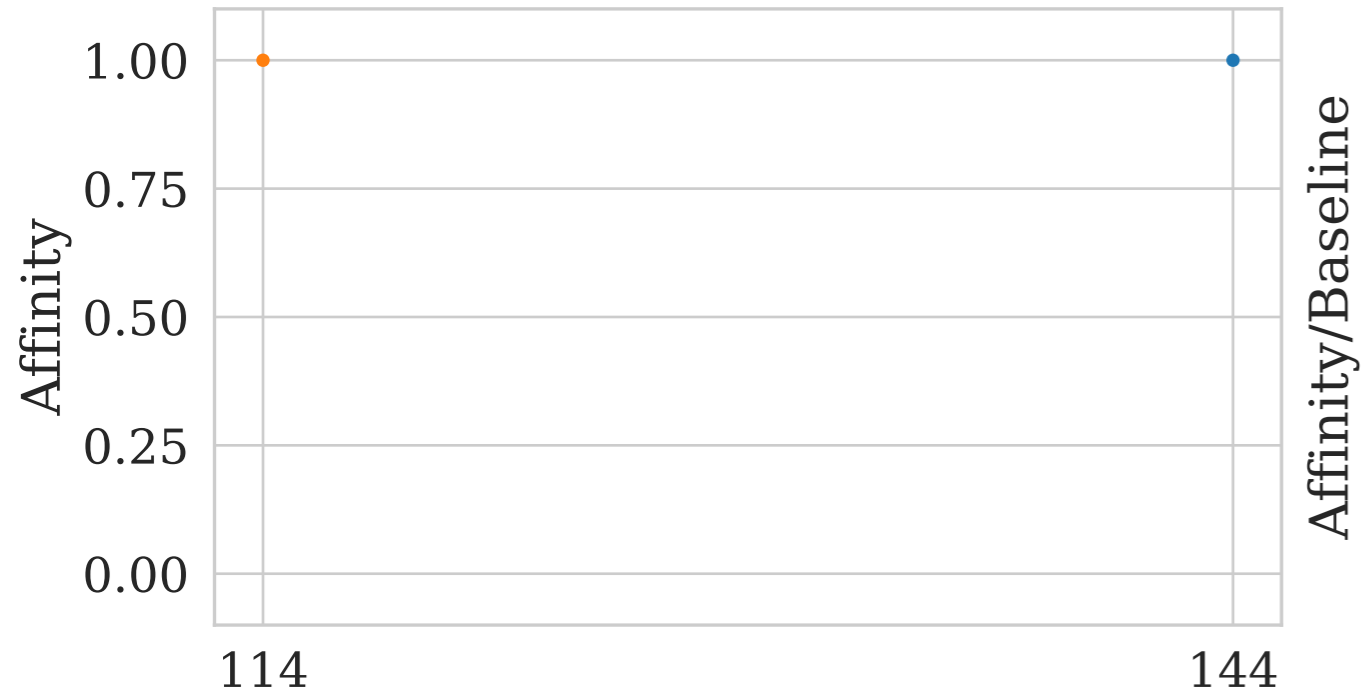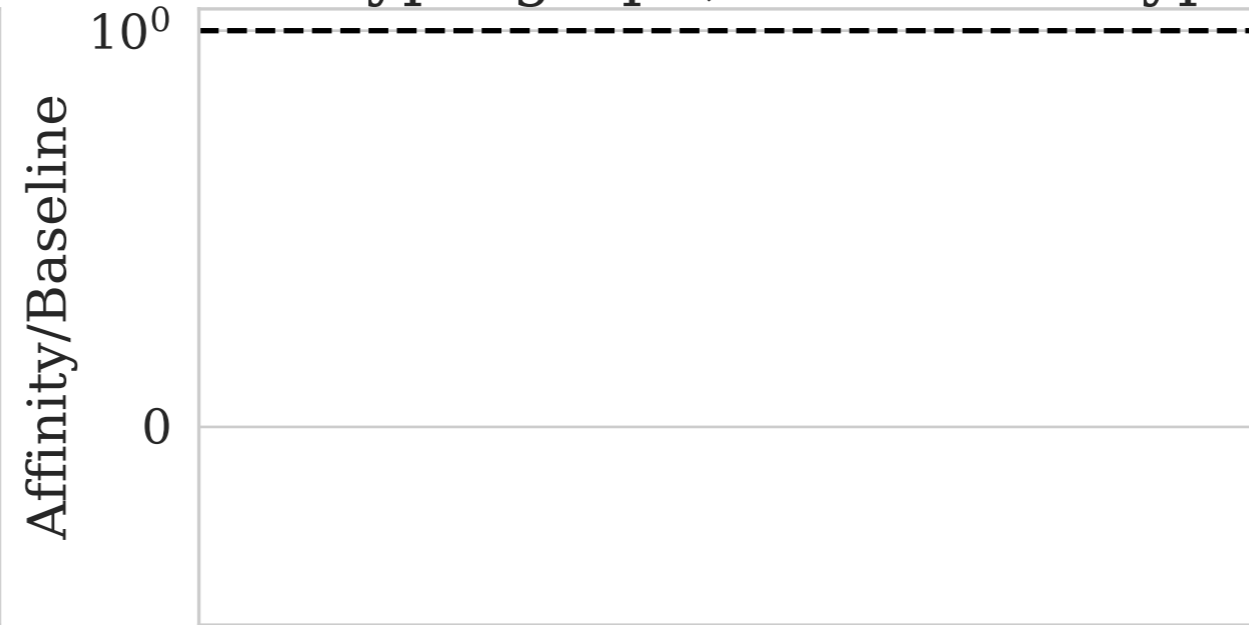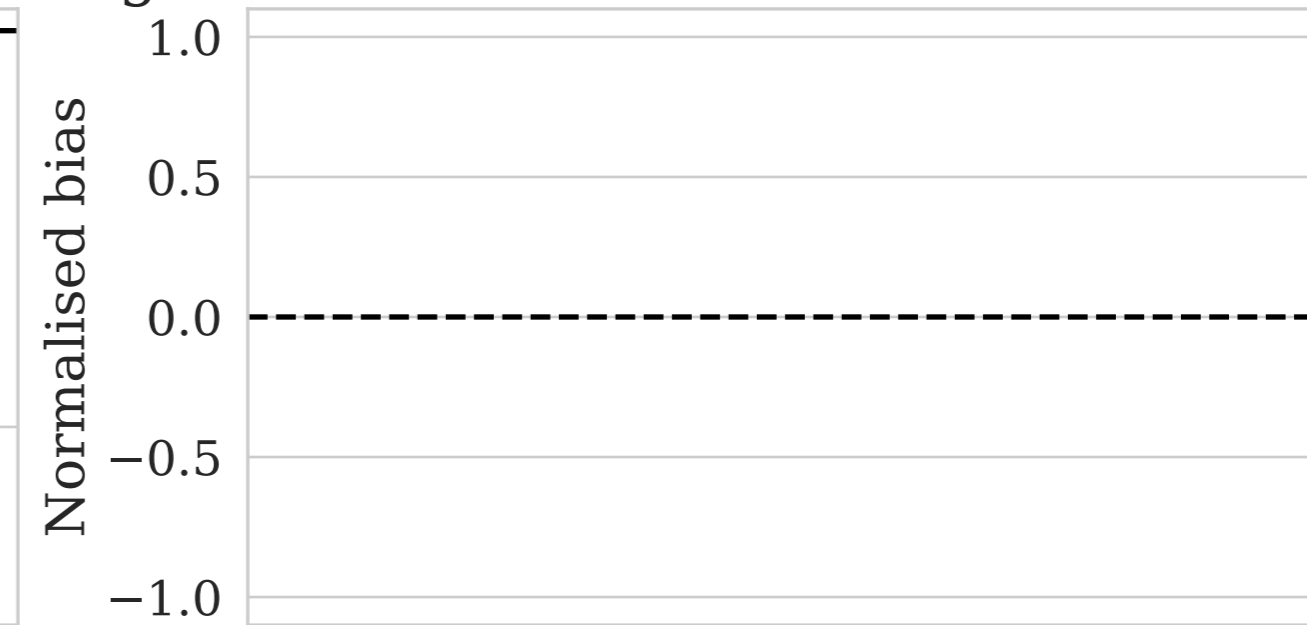

Class 0 Class 1

152-uniform hypergraph, number of hyperedges: 2

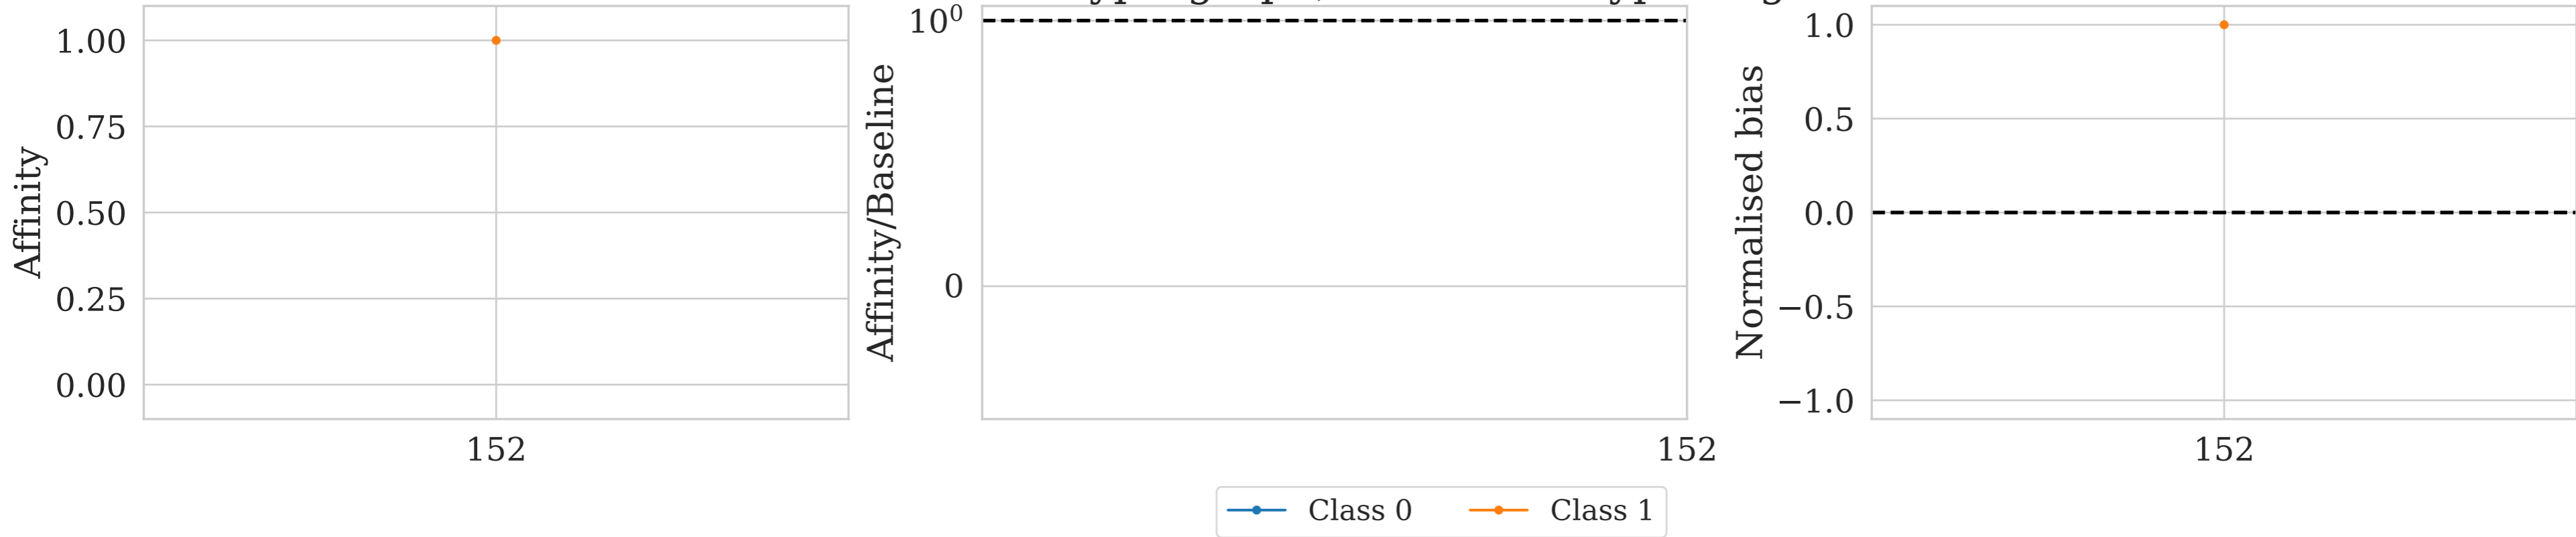

9-uniform hypergraph, number of hyperedges: 2

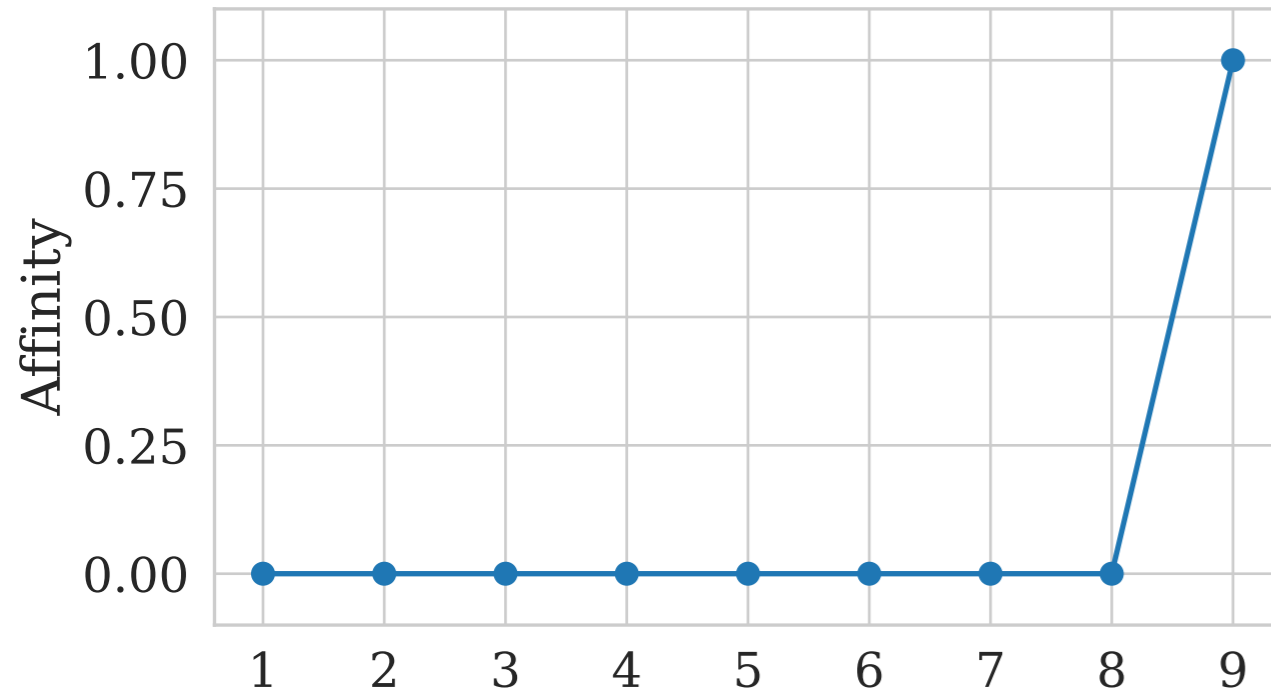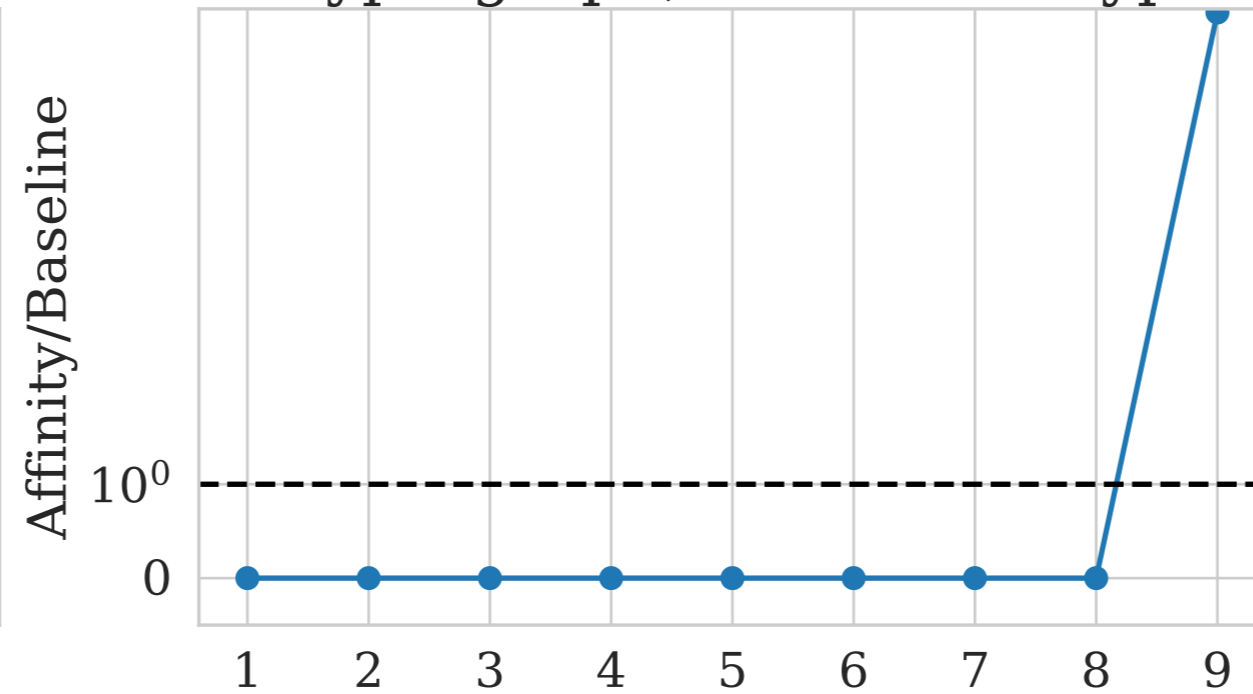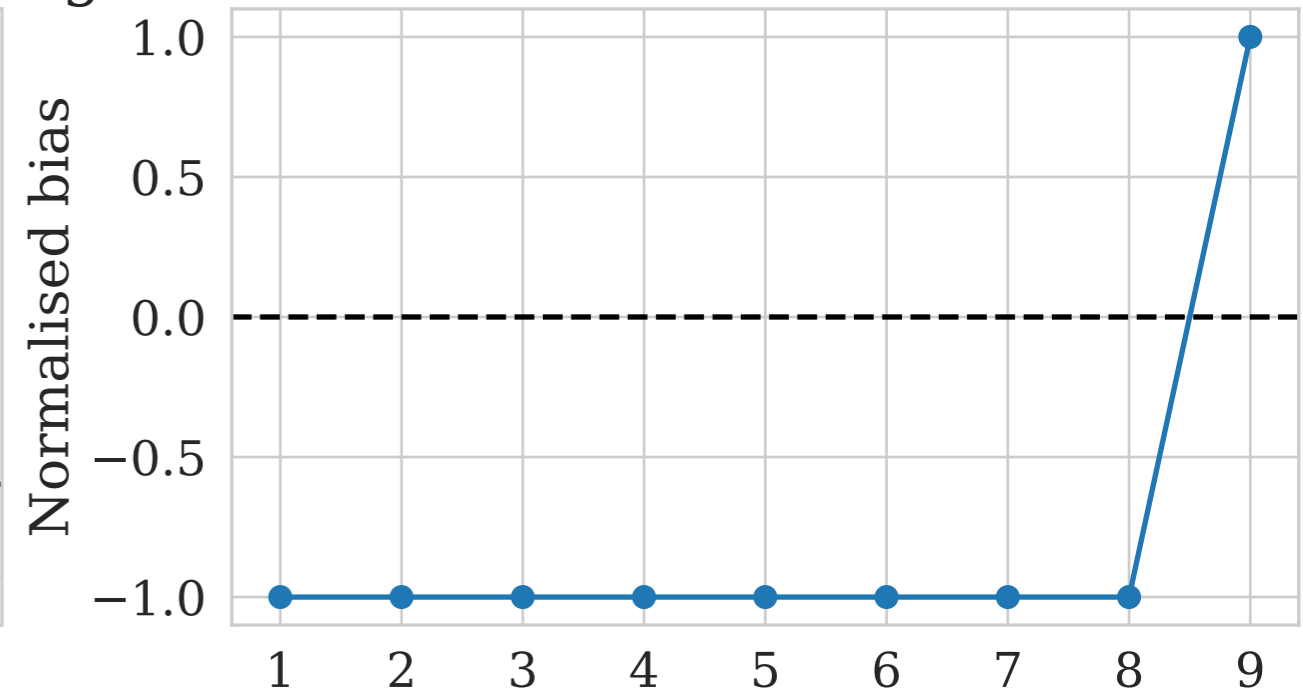

Class 0 Class 1

162-uniform hypergraph, number of hyperedges: 2

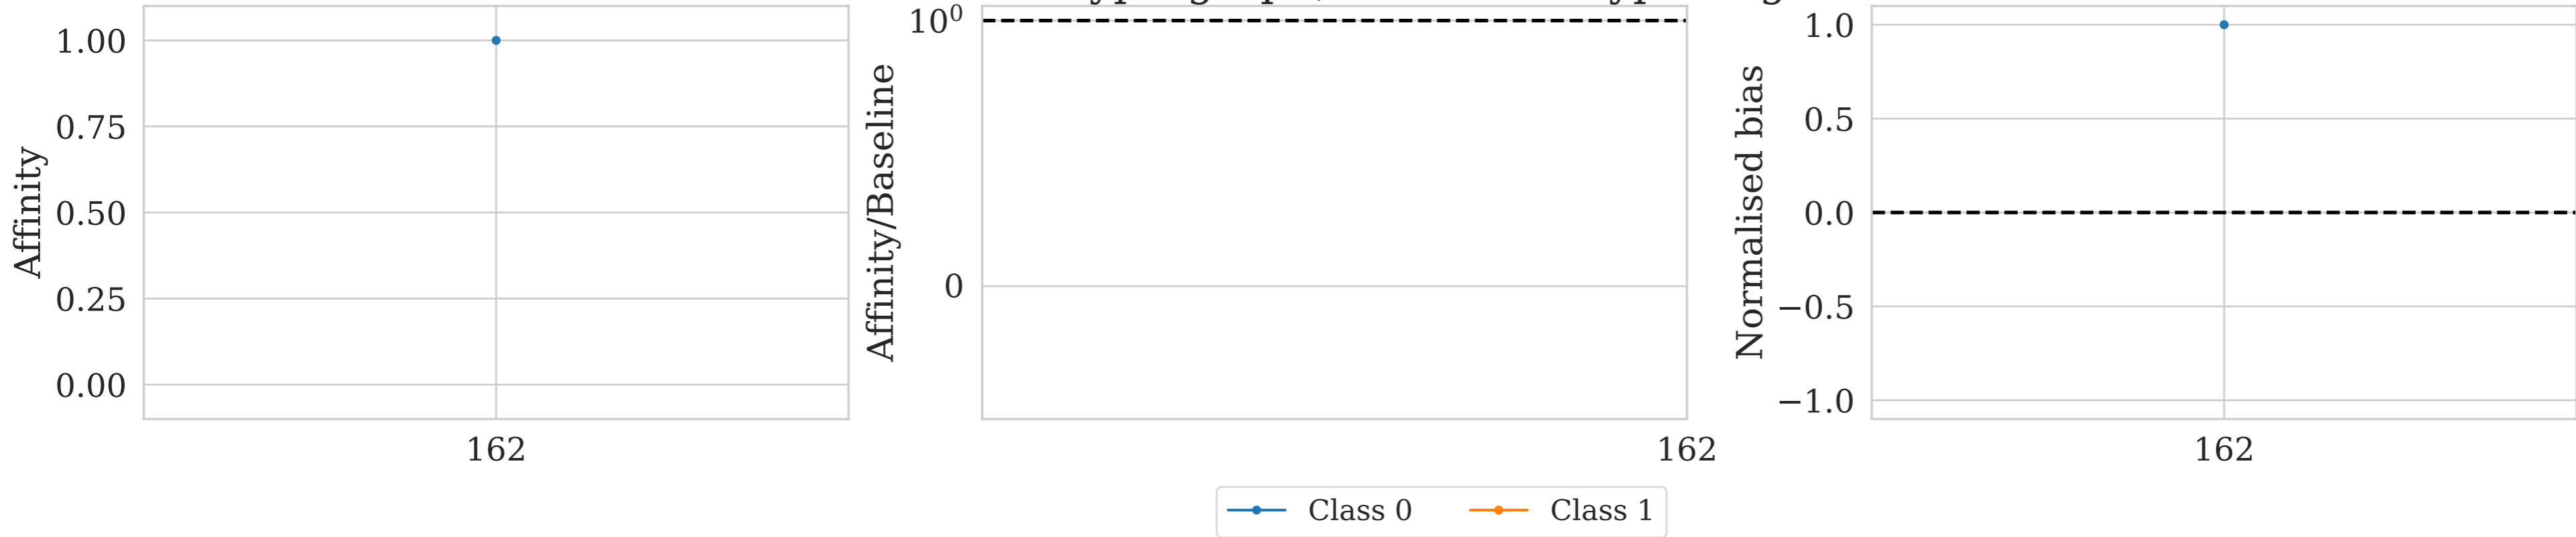

234-uniform hypergraph, number of hyperedges: 2

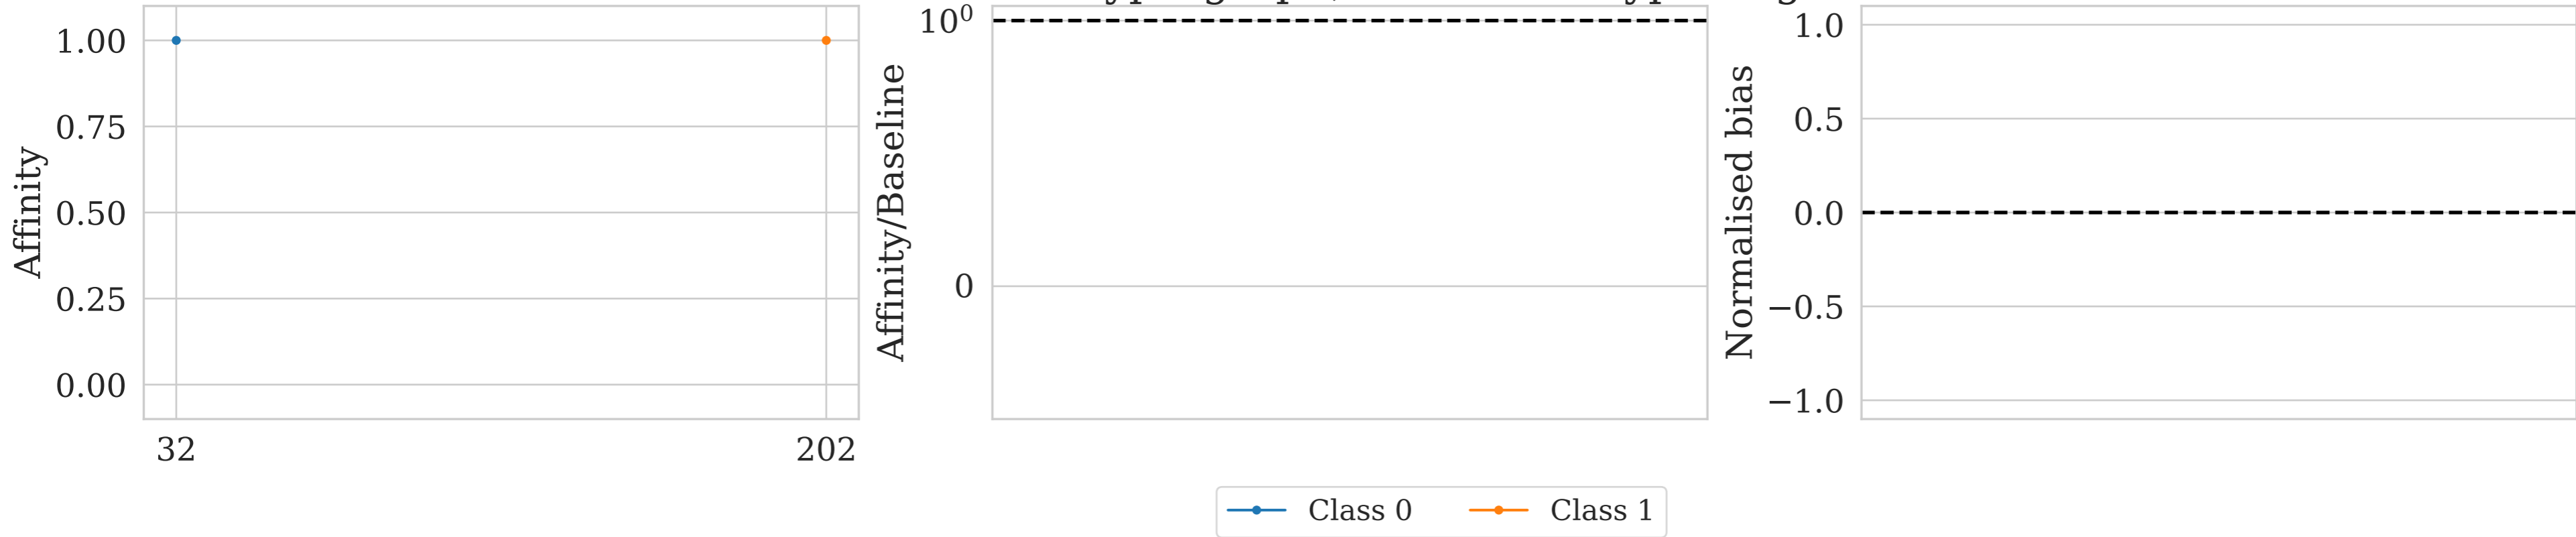

14-uniform hypergraph, number of hyperedges: 1

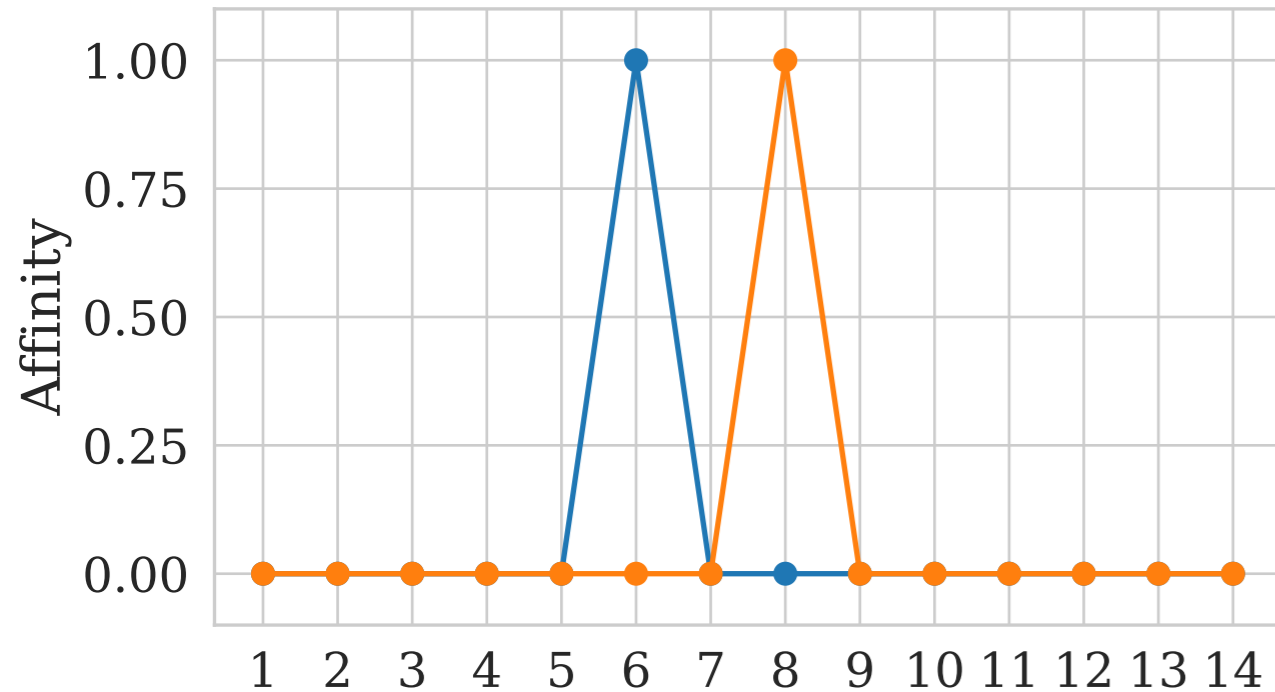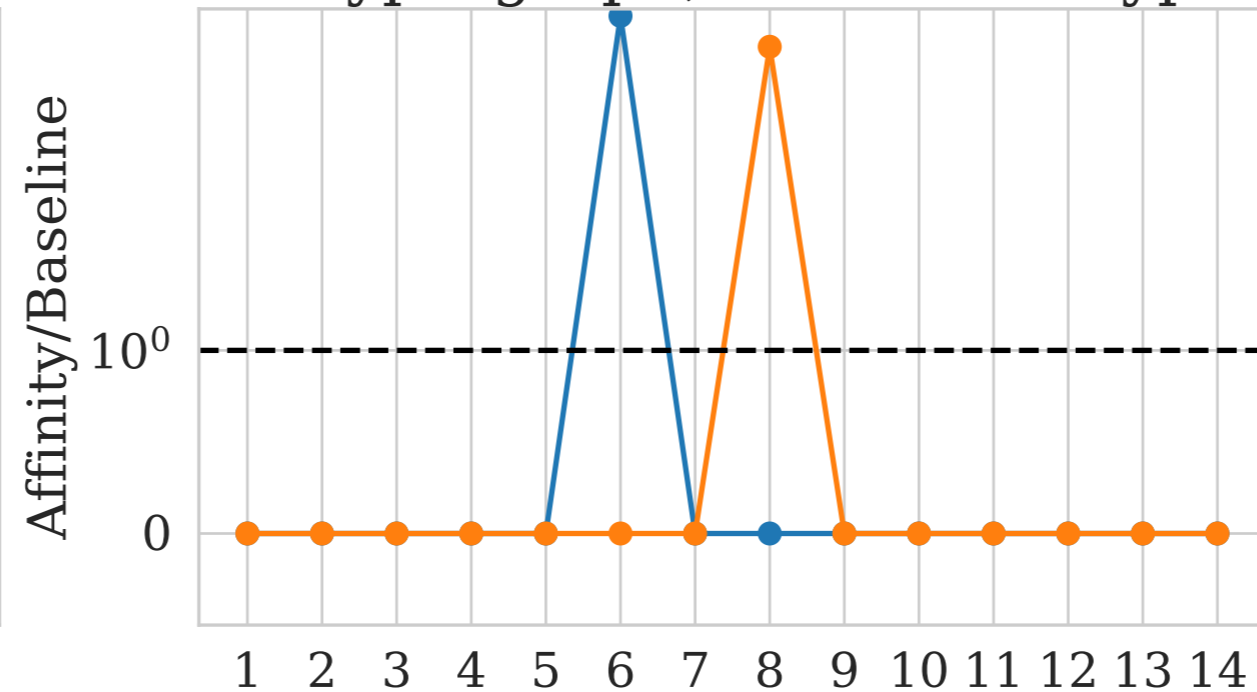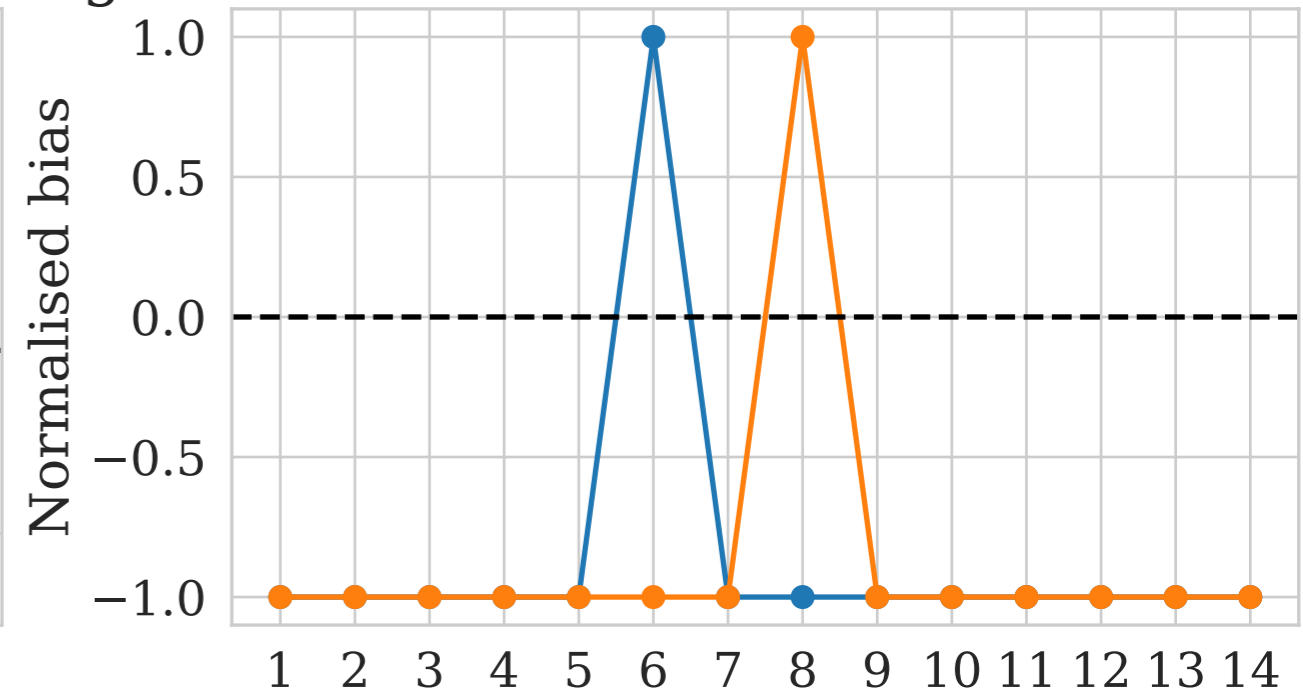

Class 0 Class 1

920-uniform hypergraph, number of hyperedges: 1

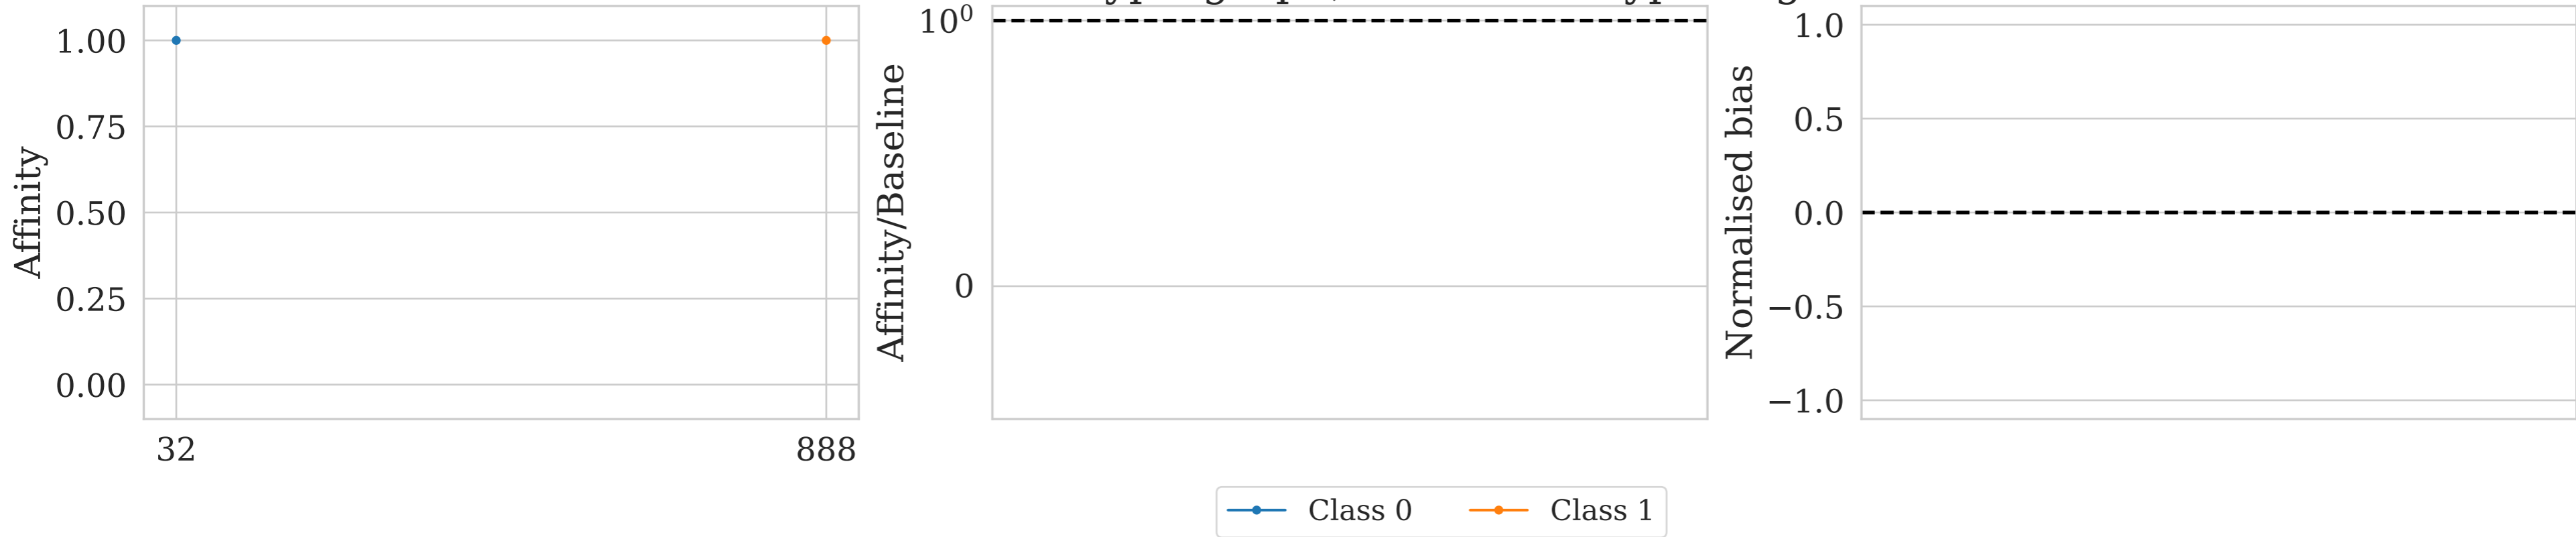

897-uniform hypergraph, number of hyperedges: 1

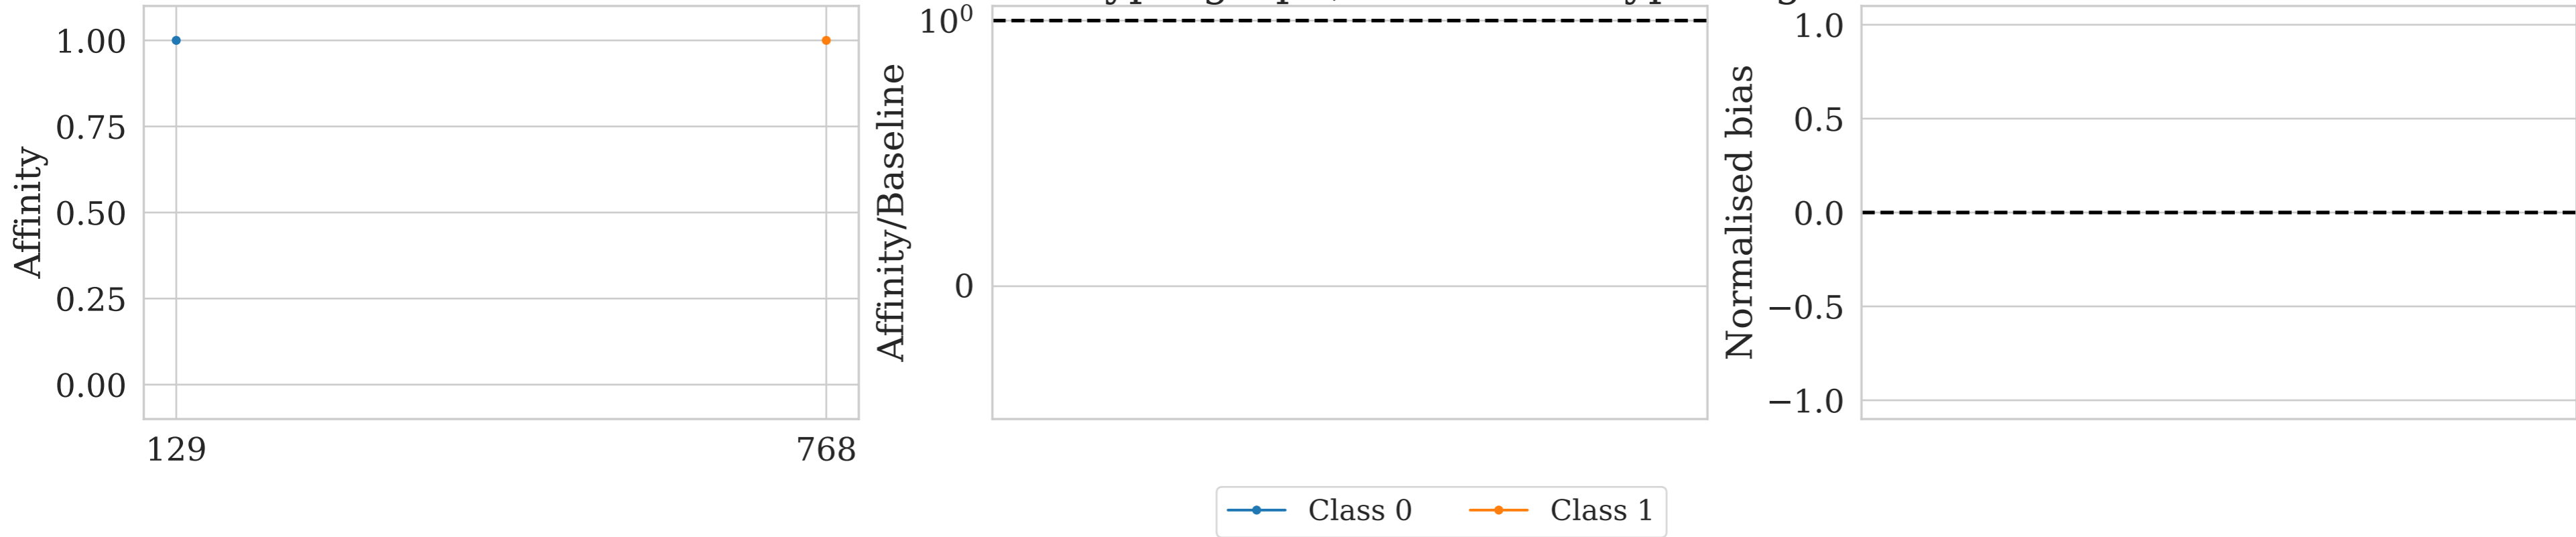

584-uniform hypergraph, number of hyperedges: 1

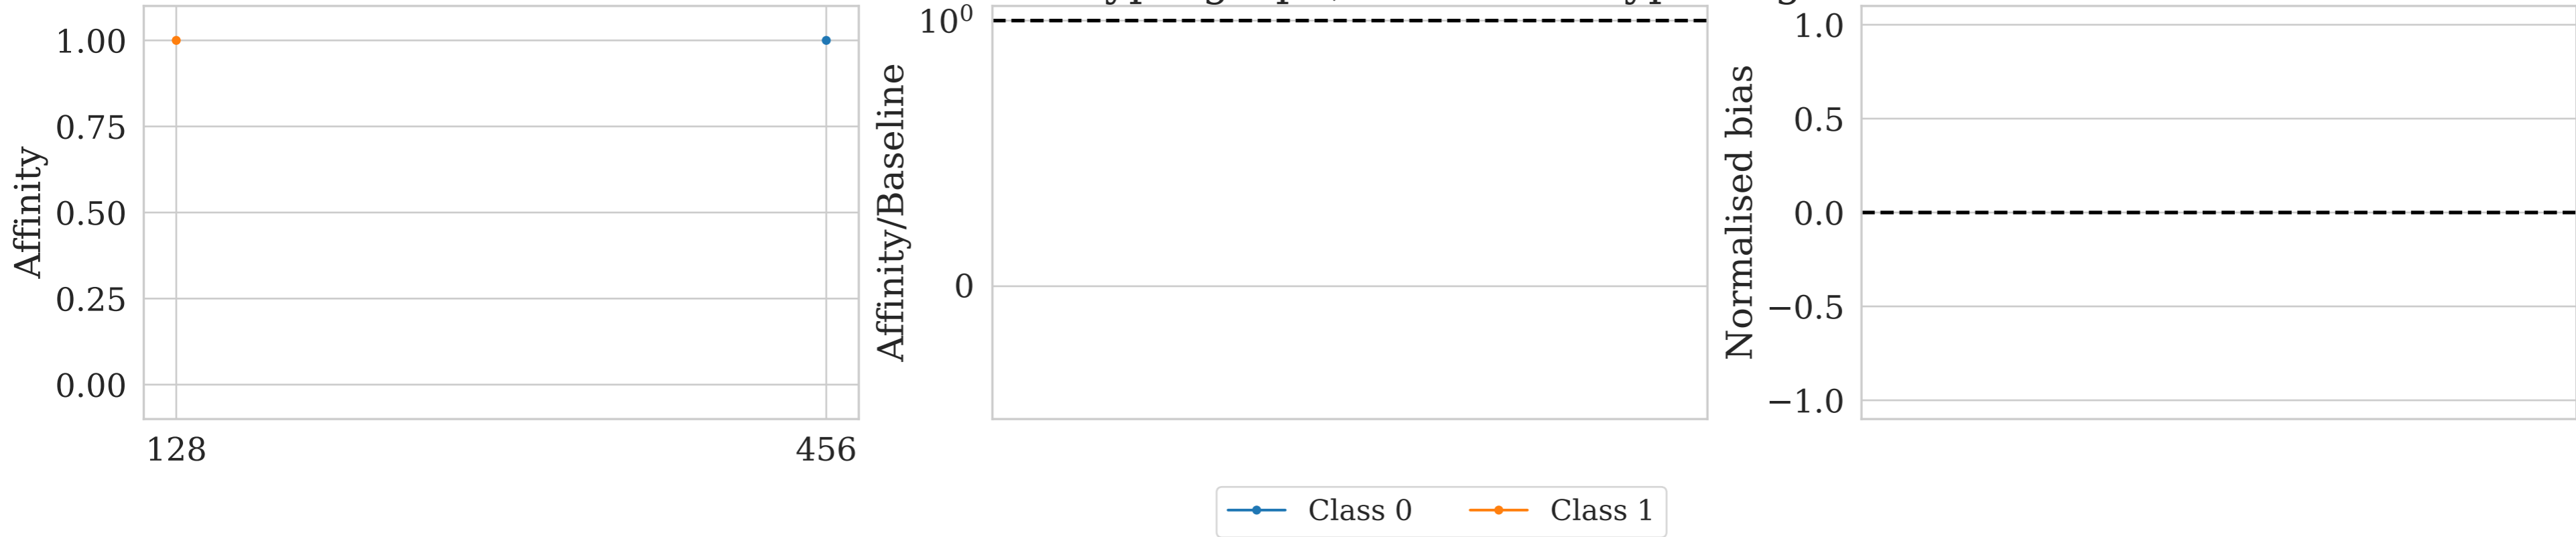

896-uniform hypergraph, number of hyperedges: 1

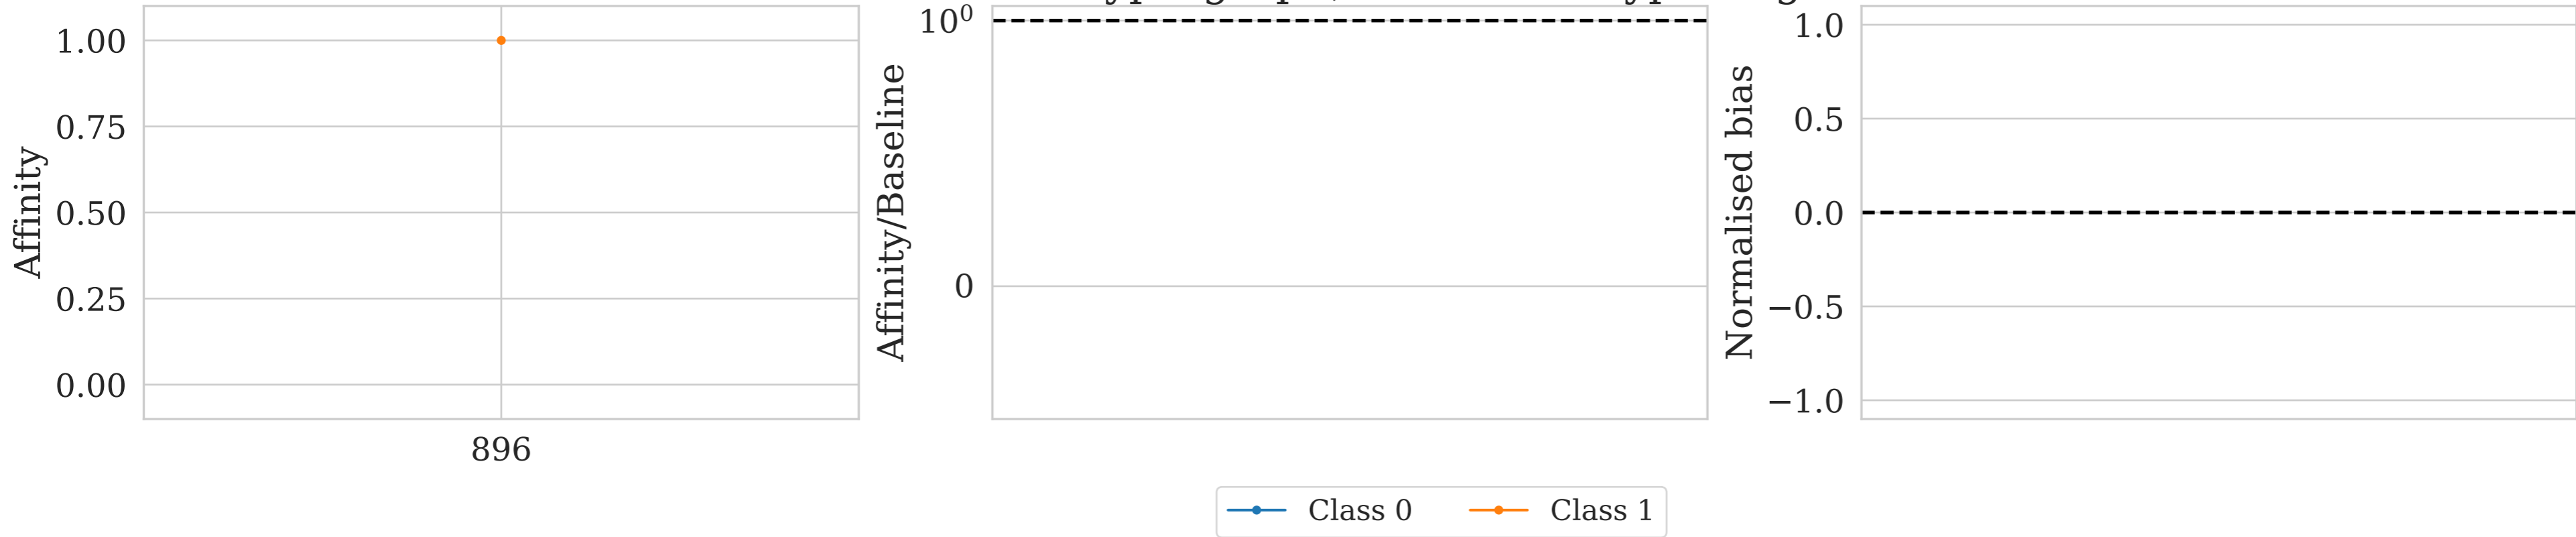

39-uniform hypergraph, number of hyperedges: 1

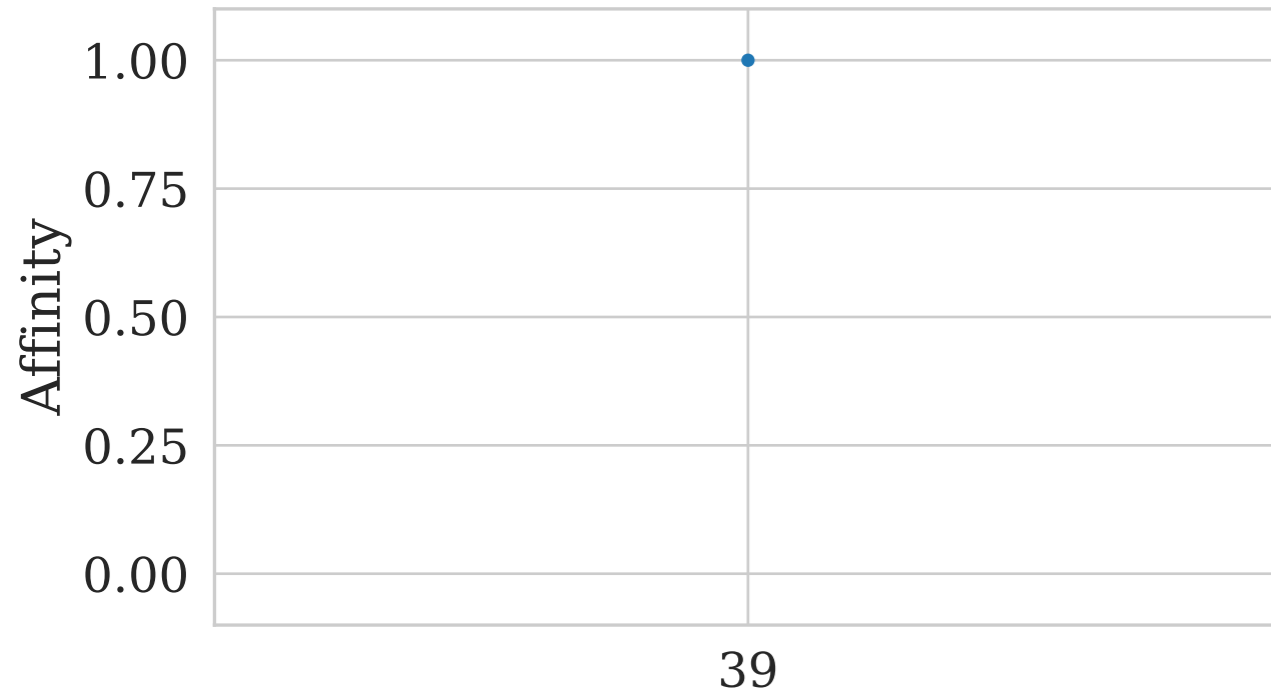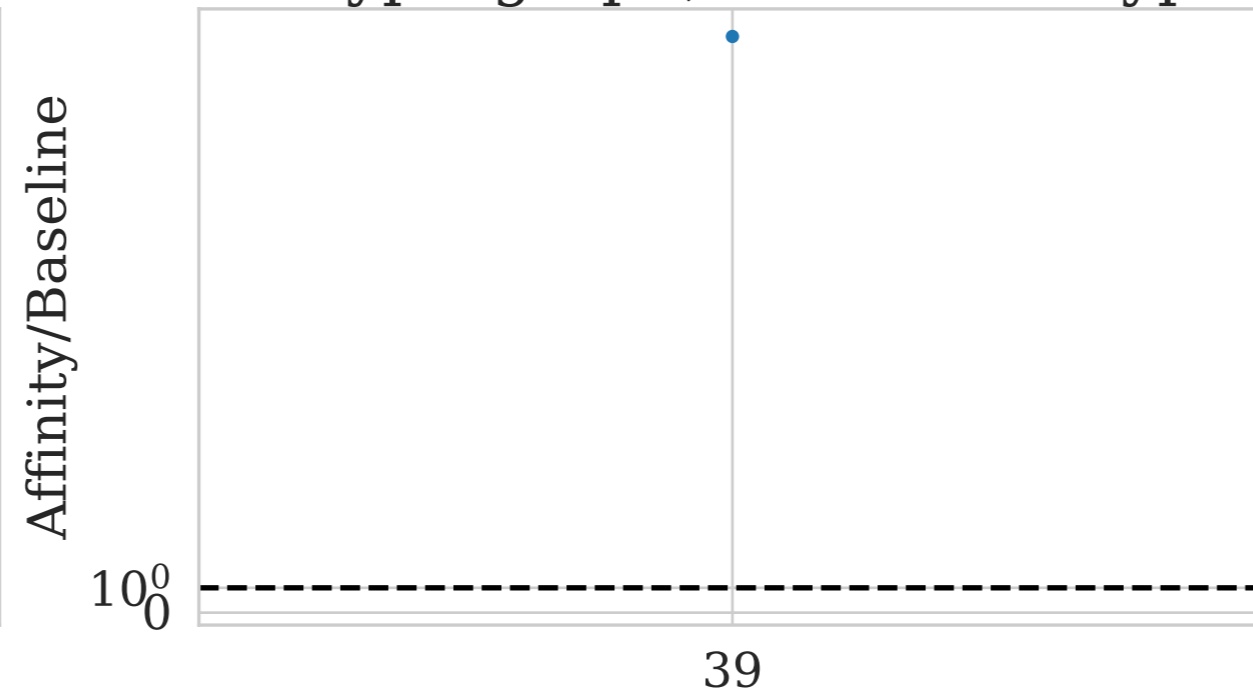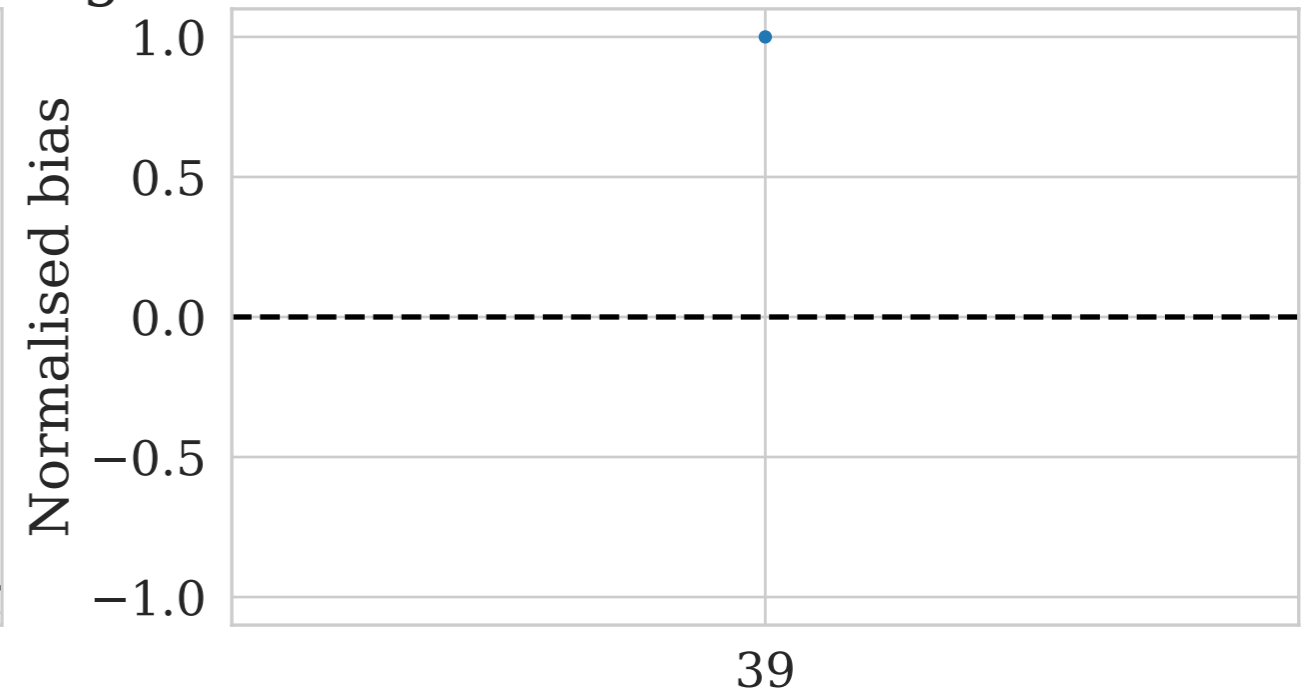

Class 0    Class 1

1296-uniform hypergraph, number of hyperedges: 1

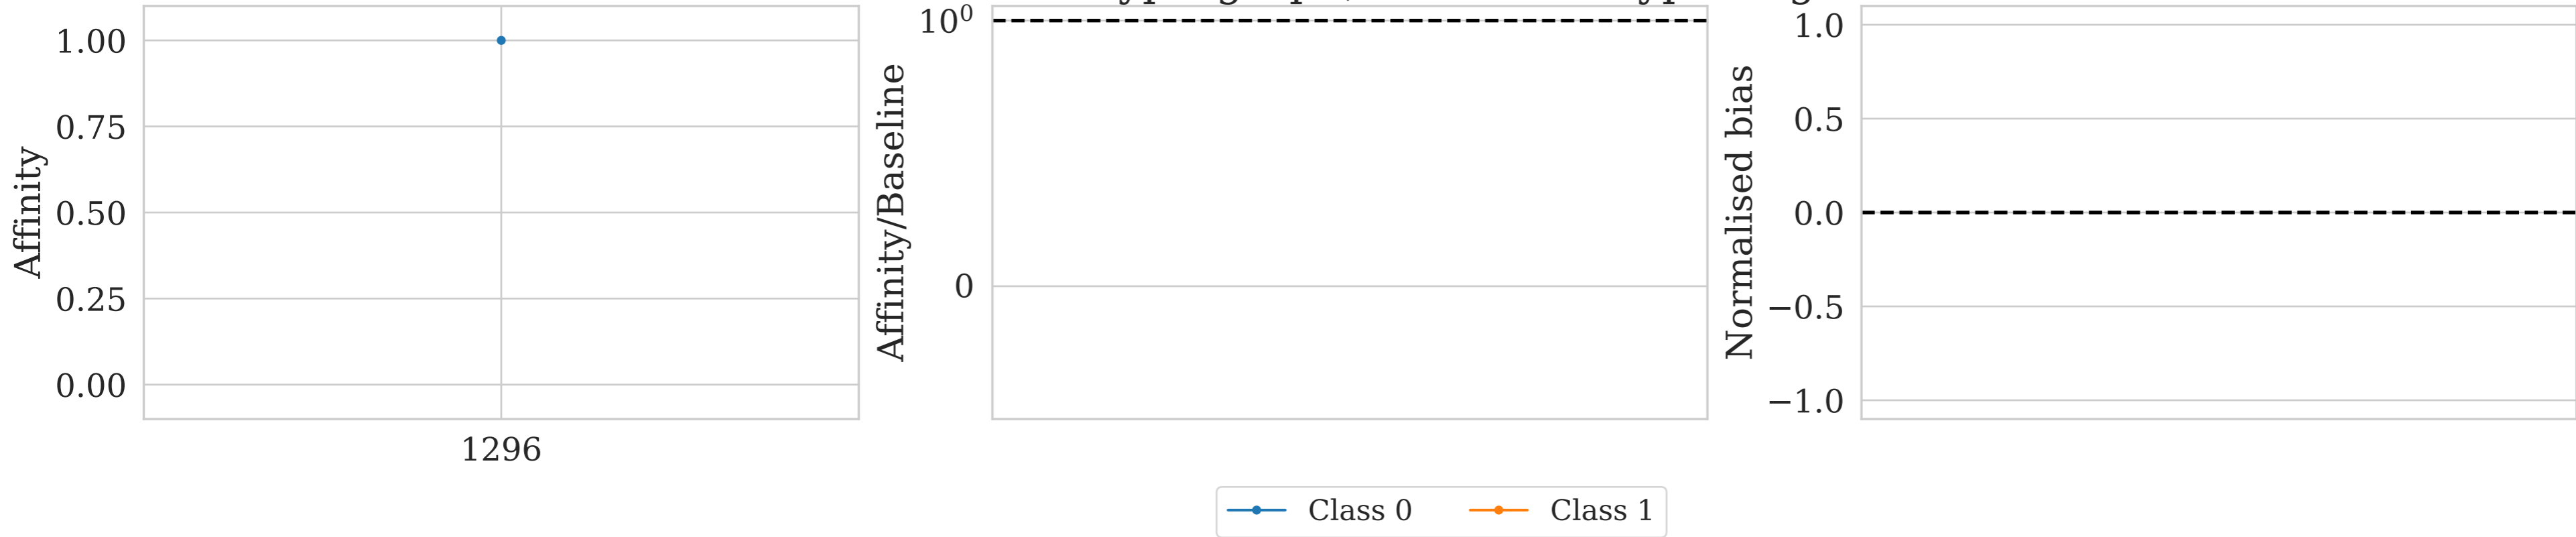

624-uniform hypergraph, number of hyperedges: 1

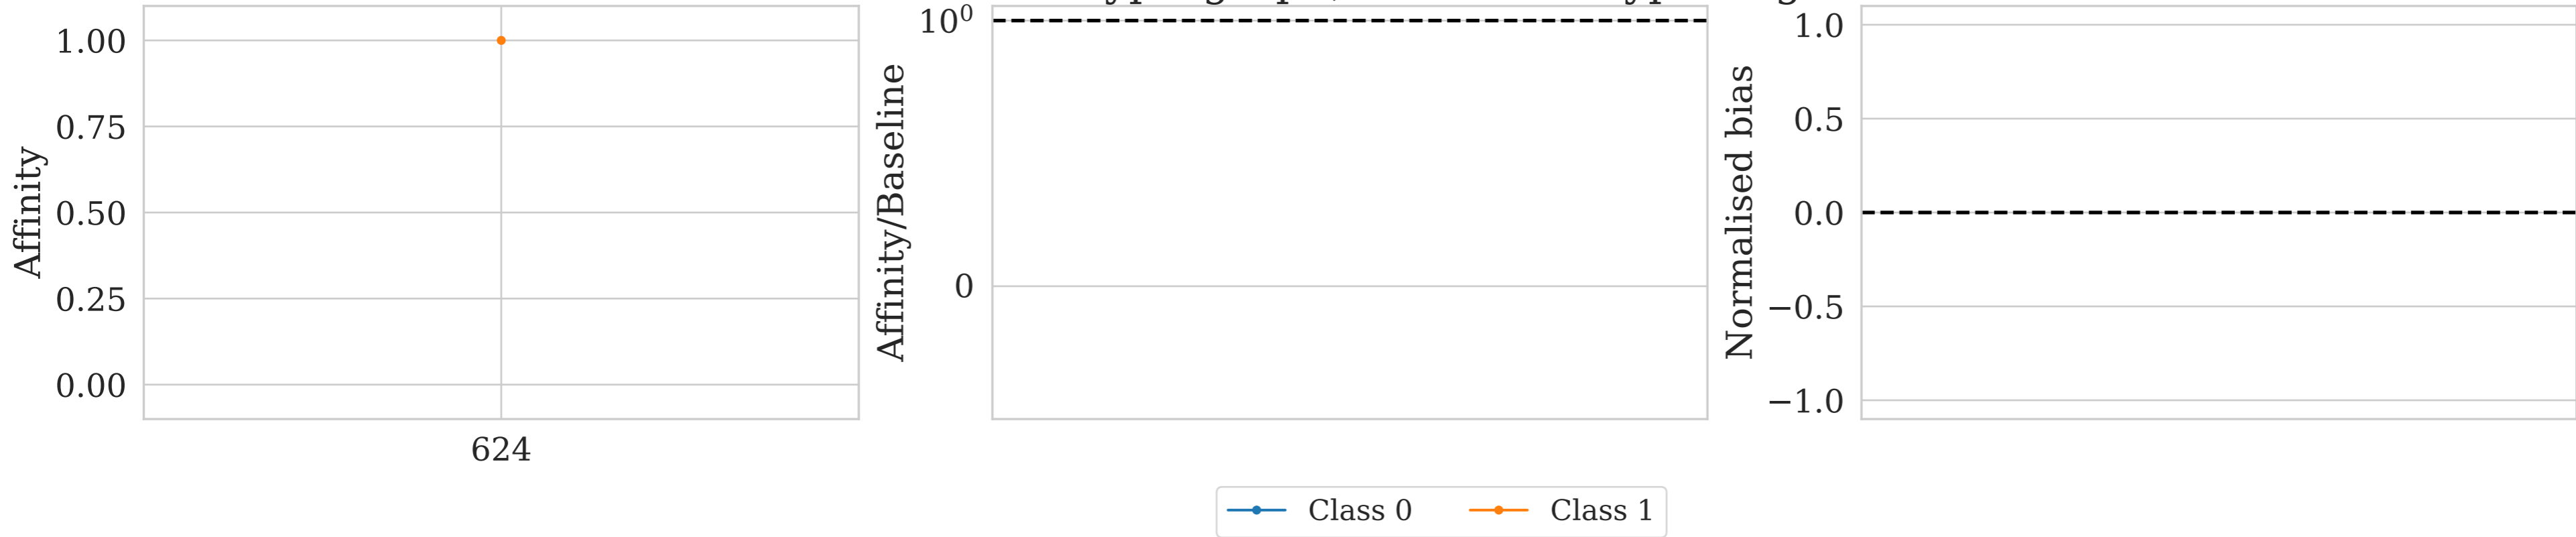

1488-uniform hypergraph, number of hyperedges: 1

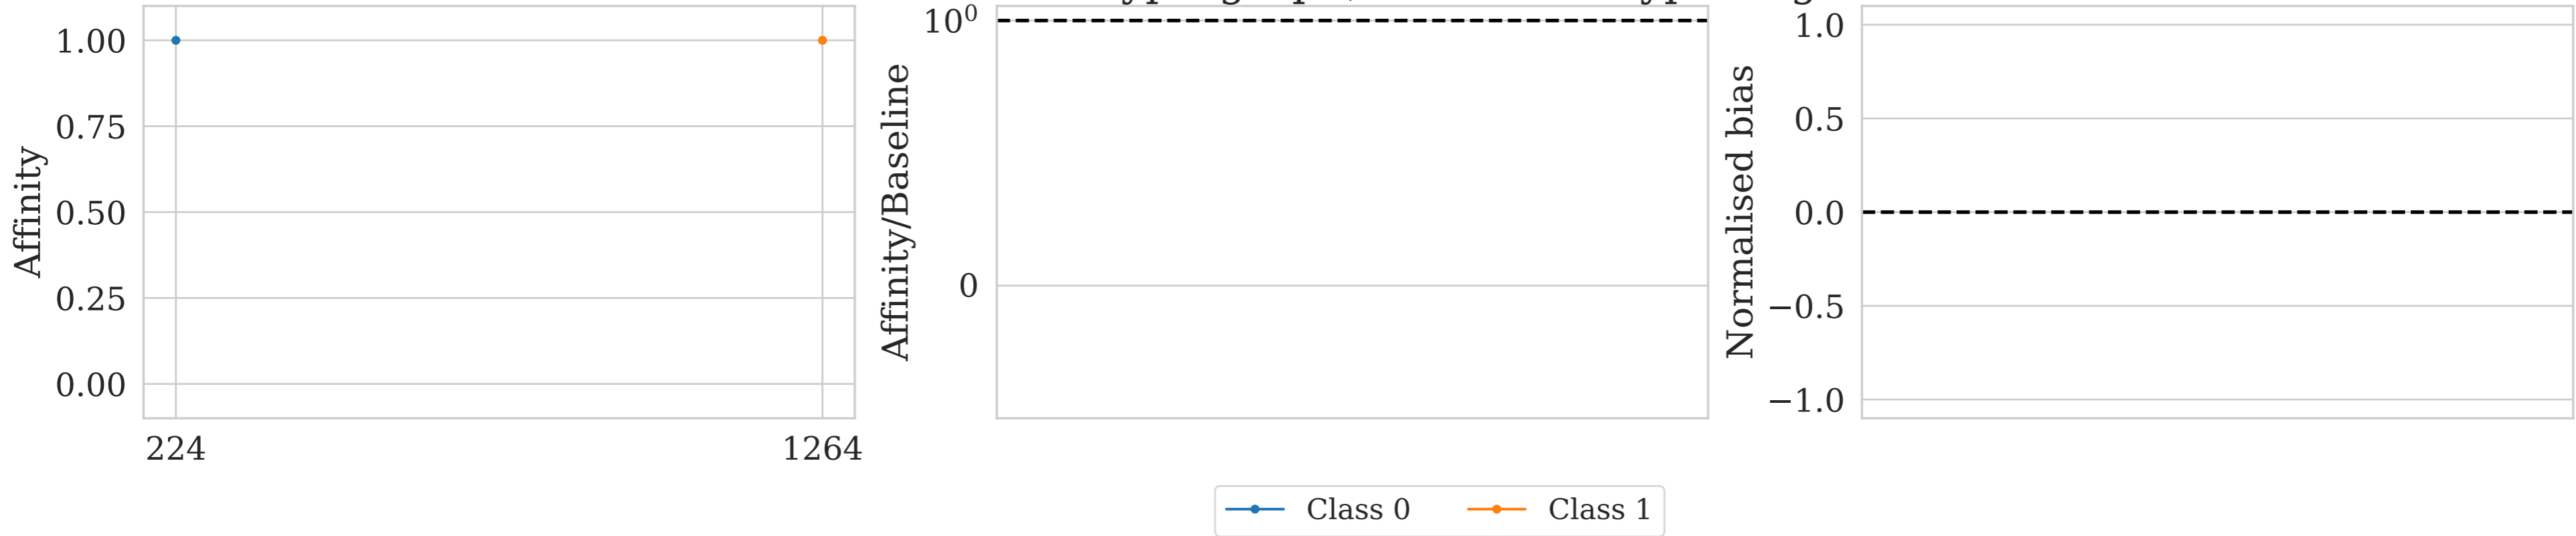

1024-uniform hypergraph, number of hyperedges: 1

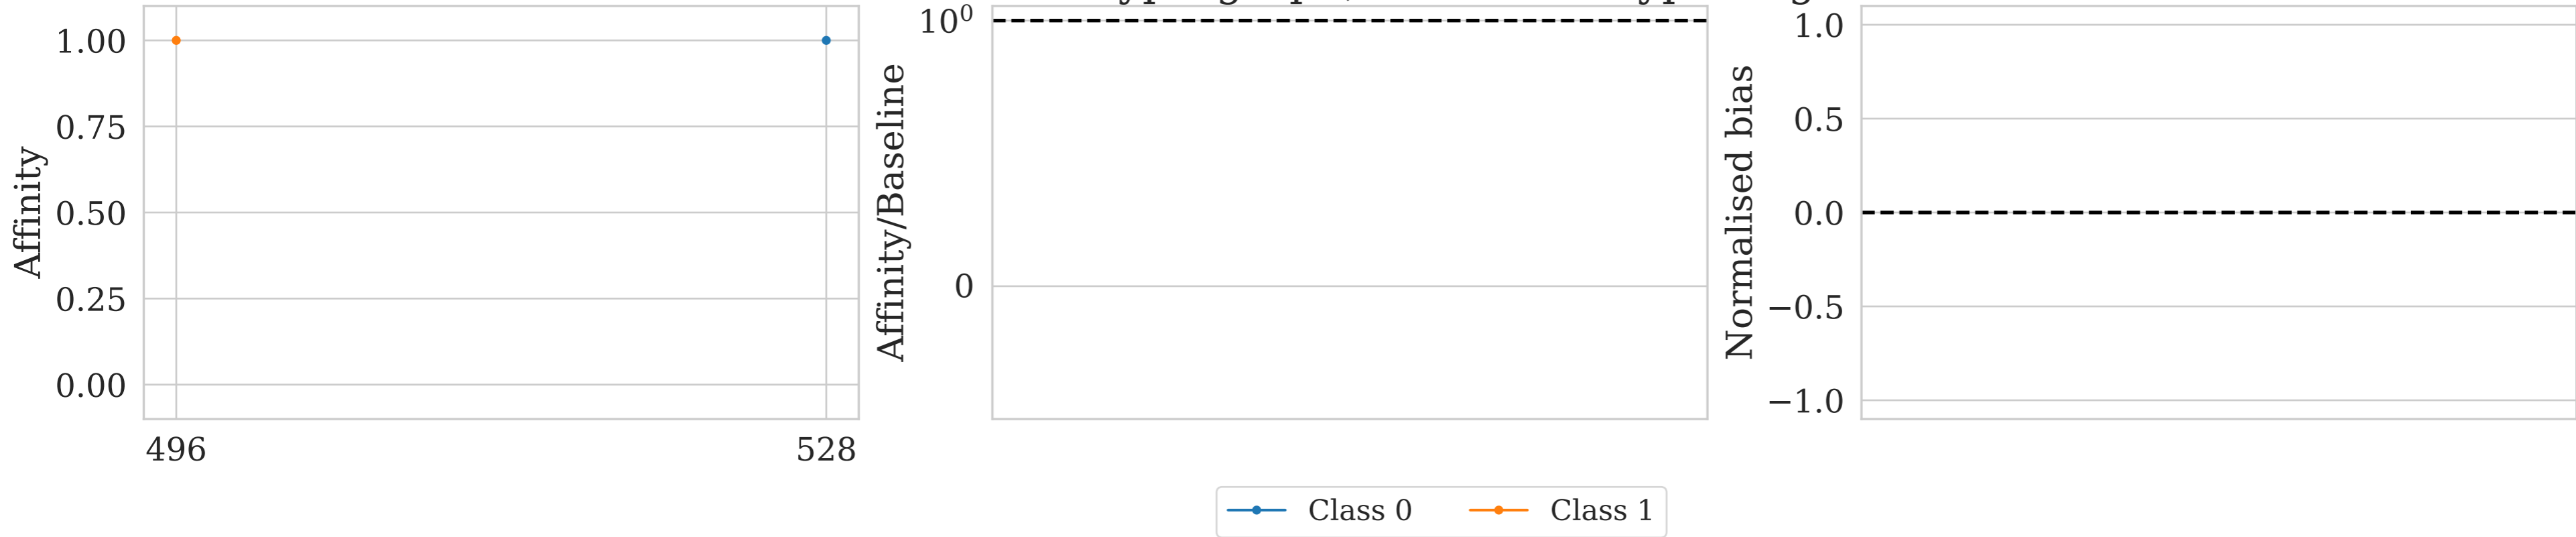

1536-uniform hypergraph, number of hyperedges: 1

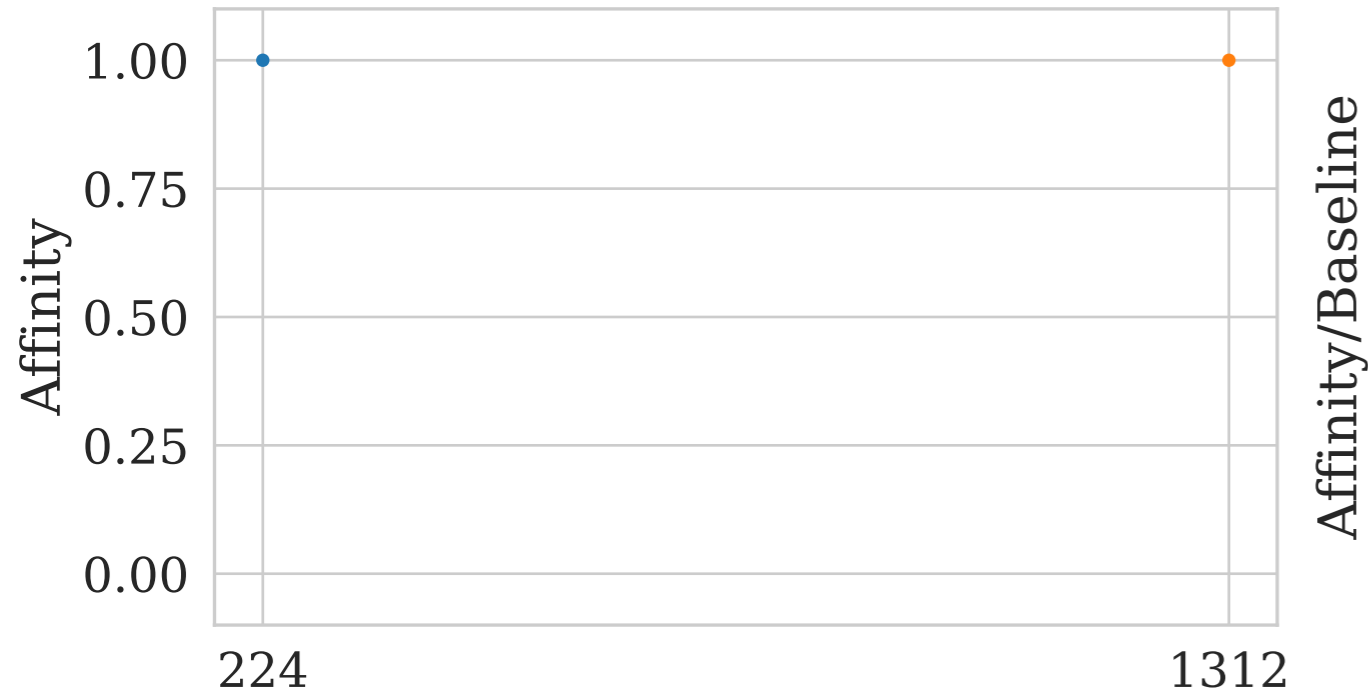

Affinity/Baseline

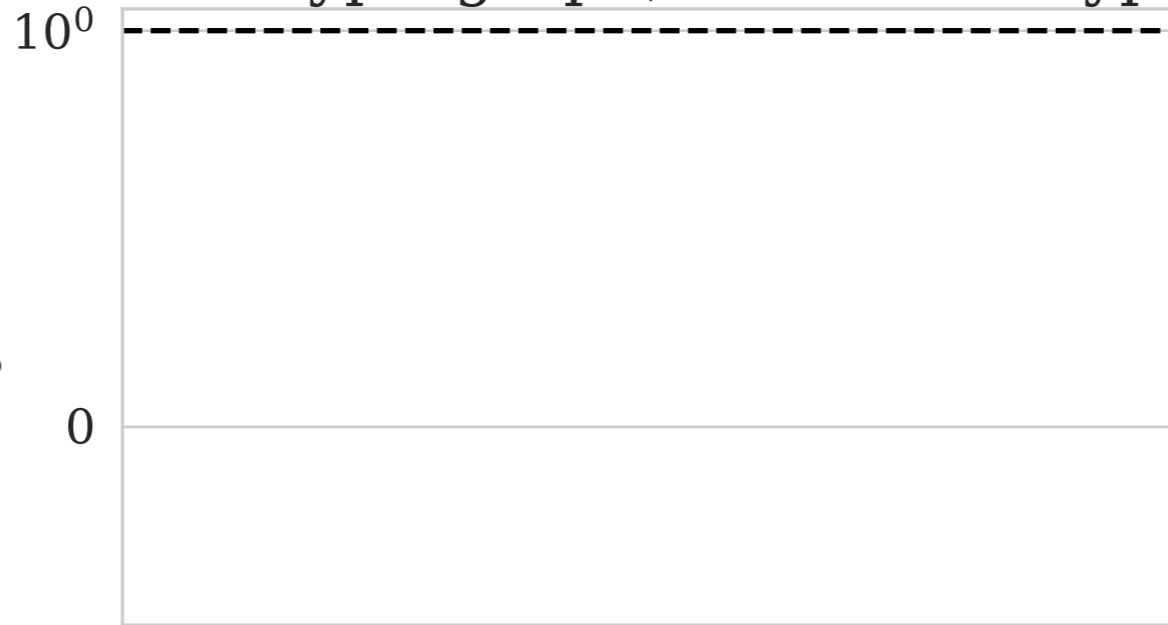

Normalised bias

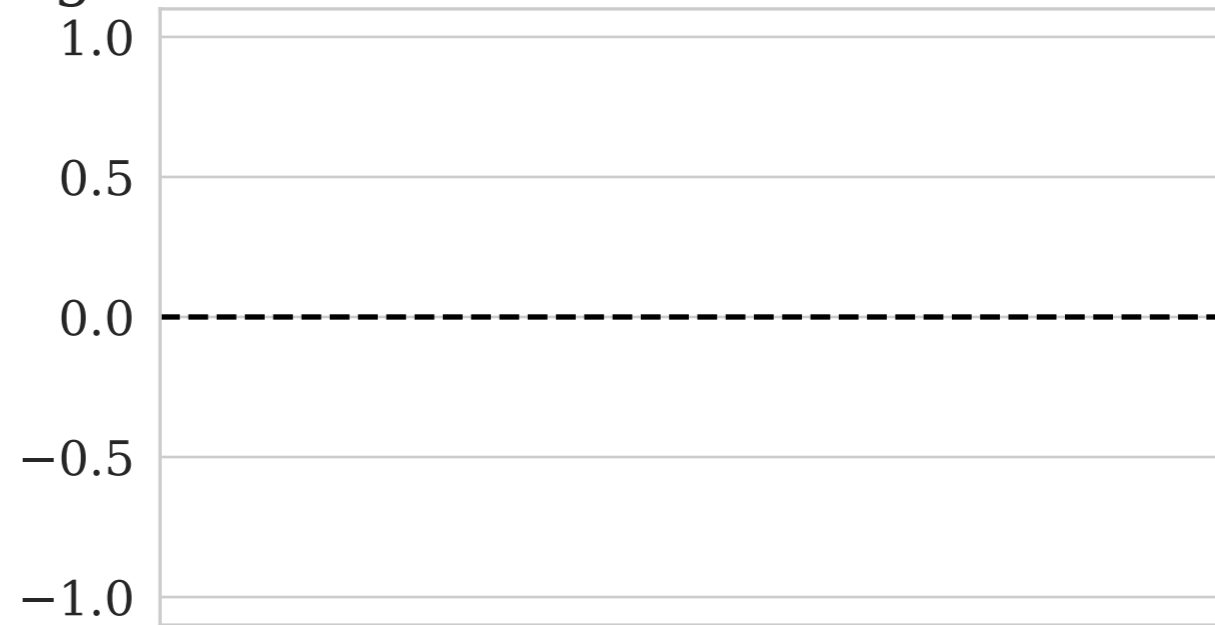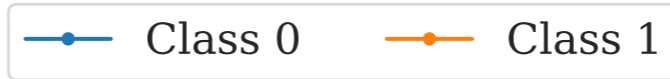

62-uniform hypergraph, number of hyperedges: 1

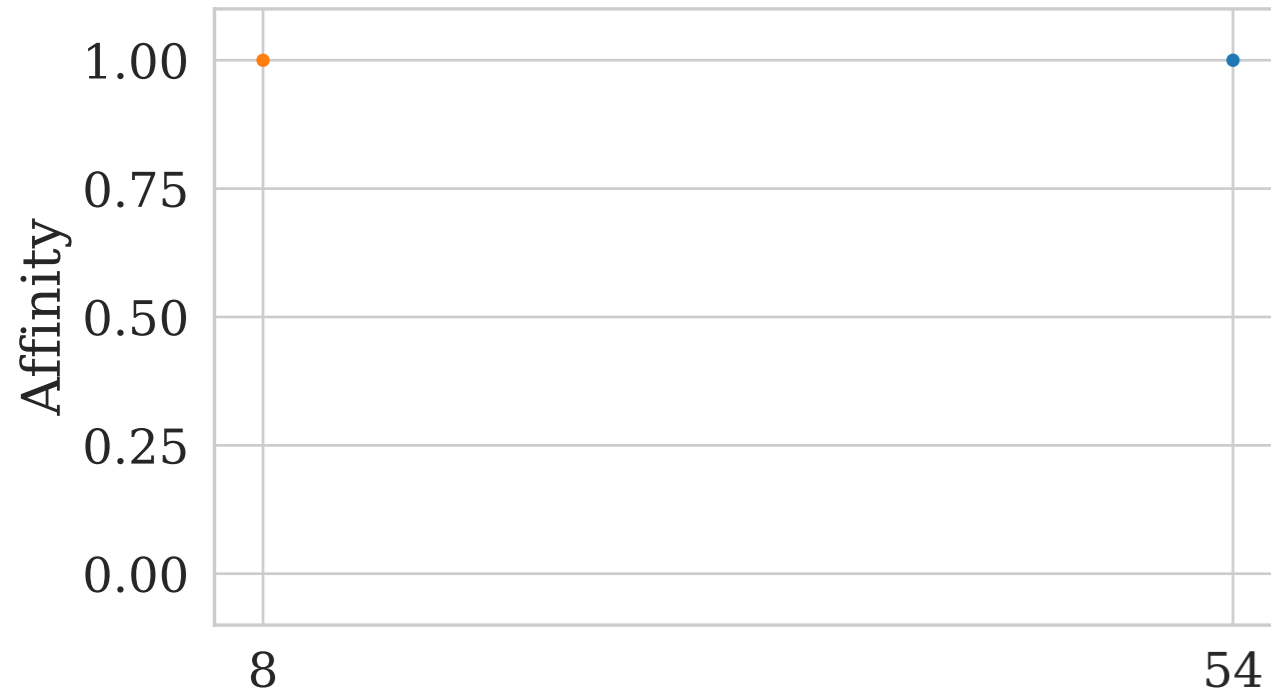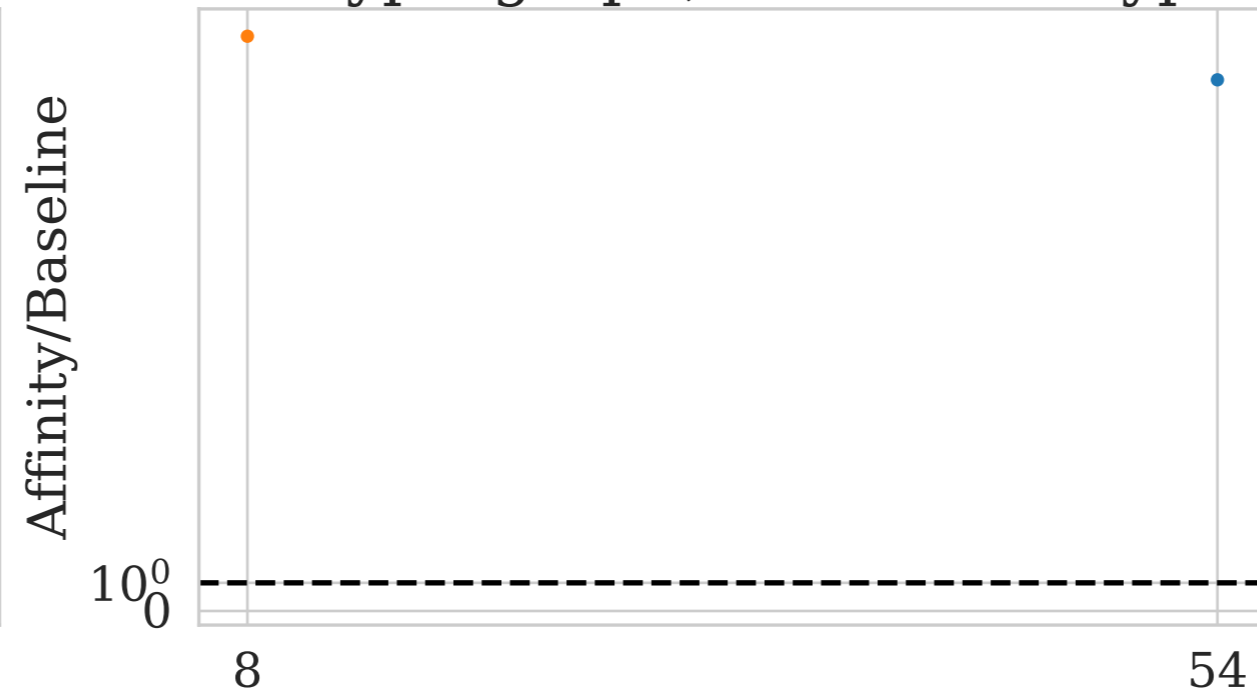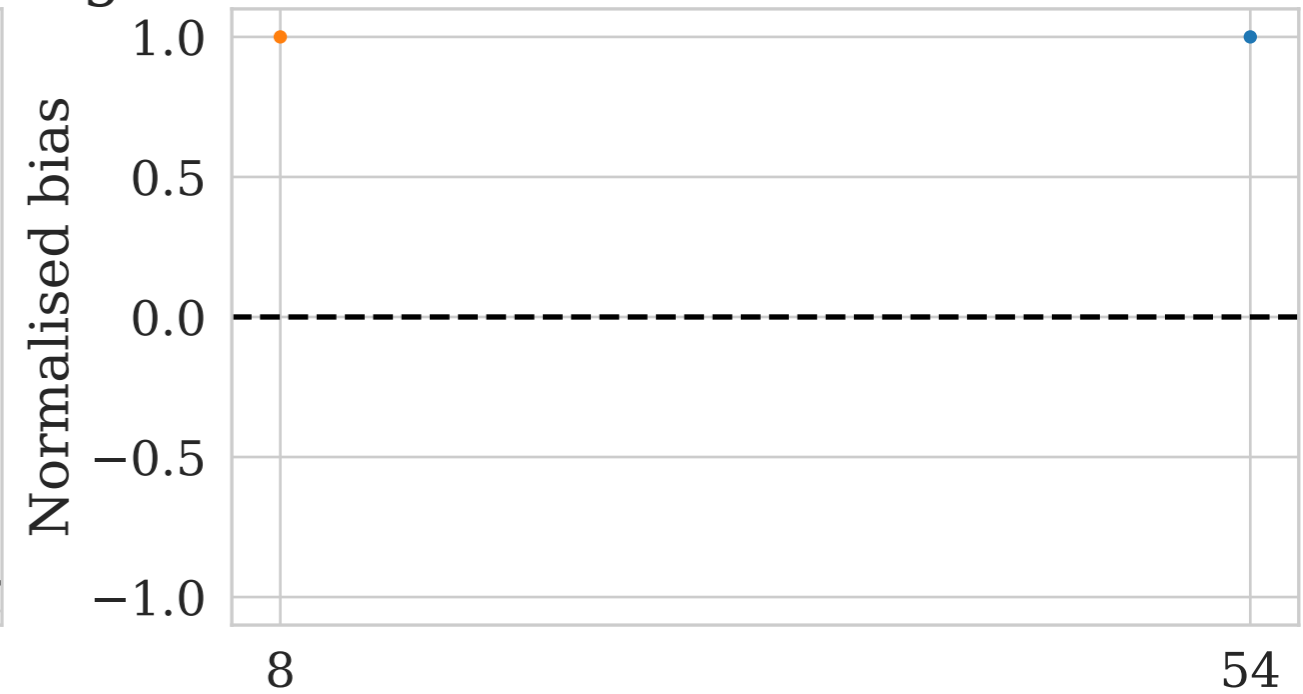

Class 0 Class 1

92-uniform hypergraph, number of hyperedges: 1

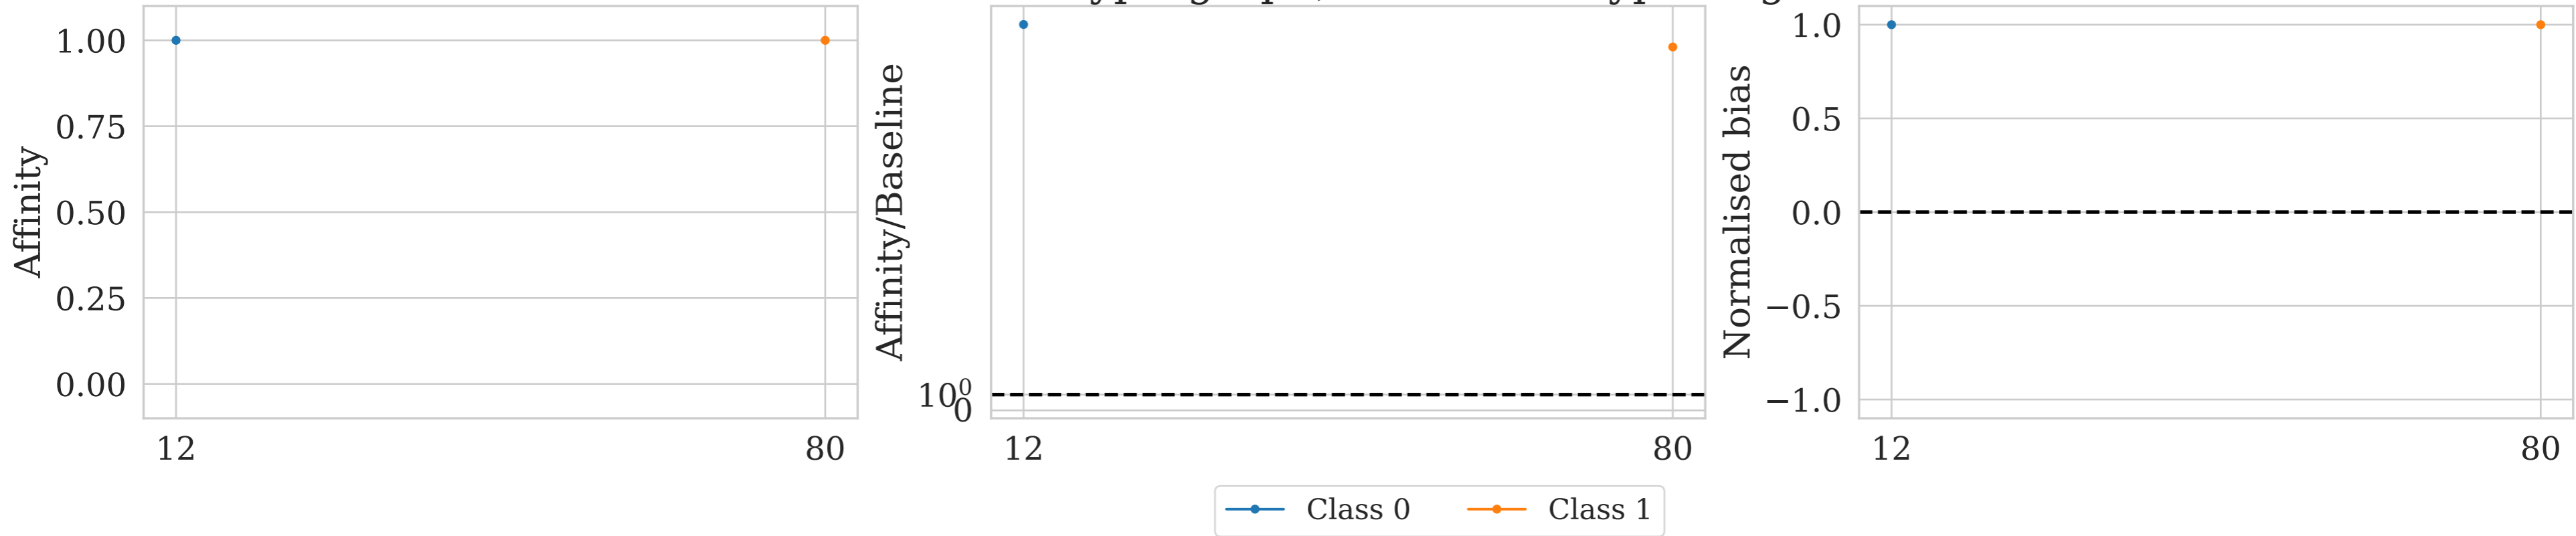

70-uniform hypergraph, number of hyperedges: 1

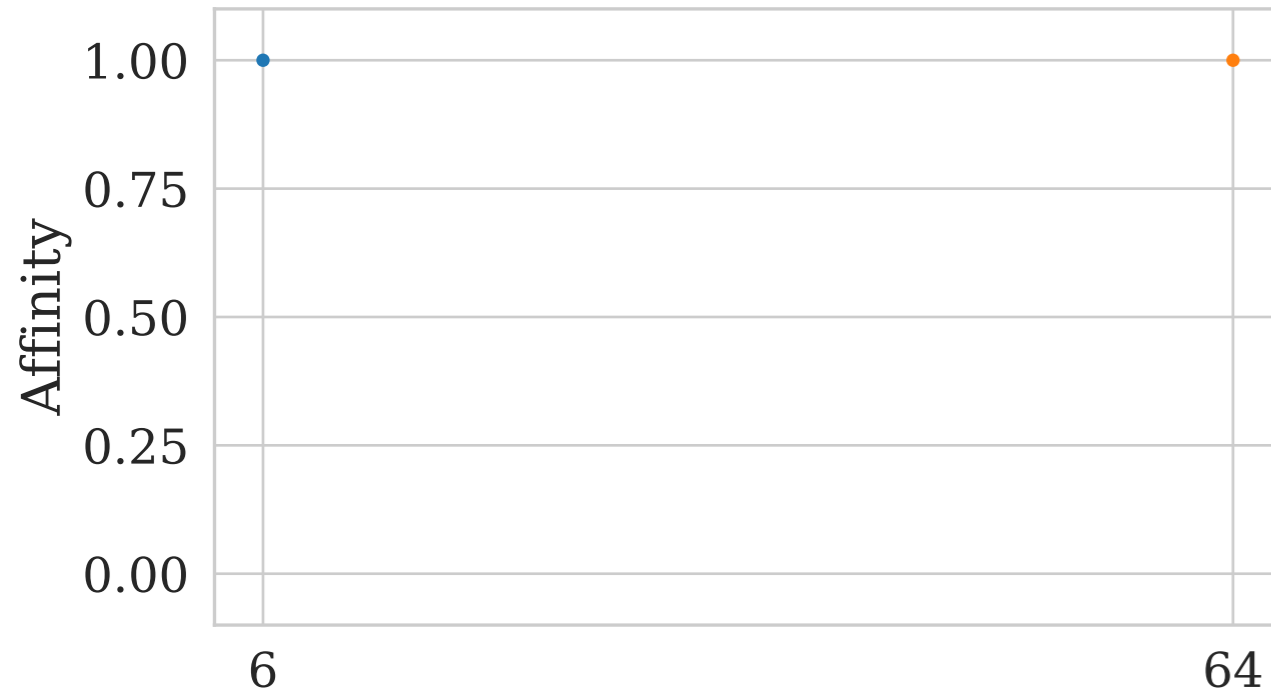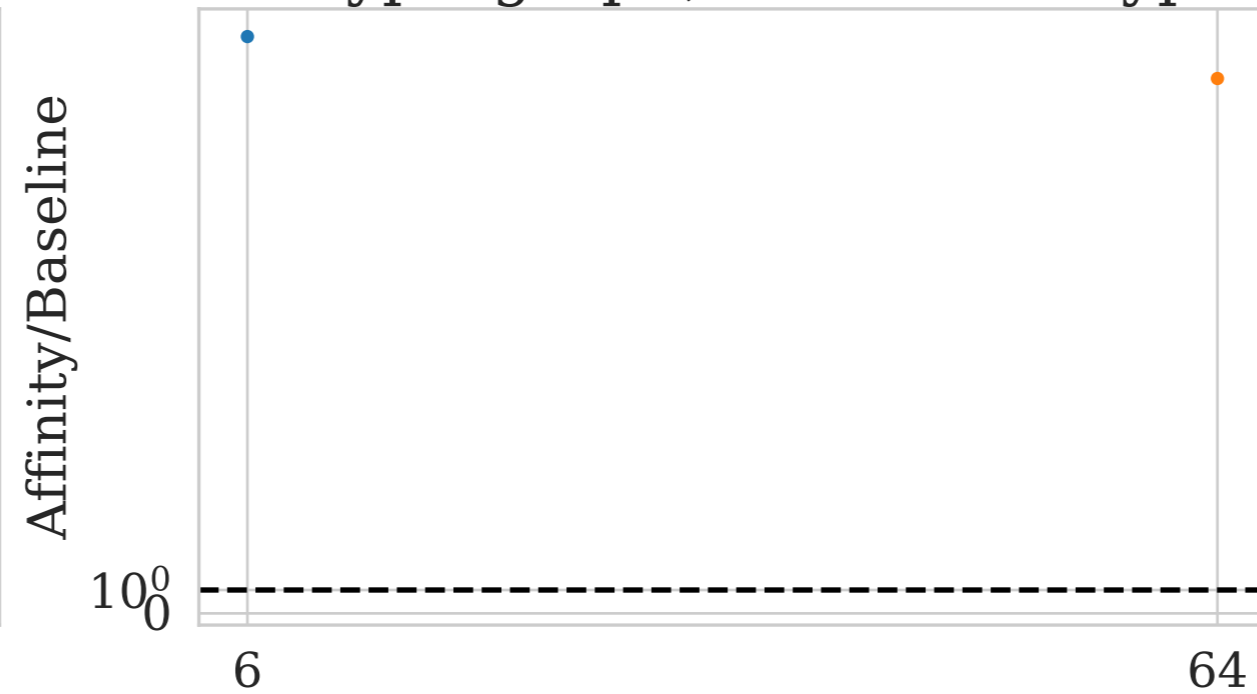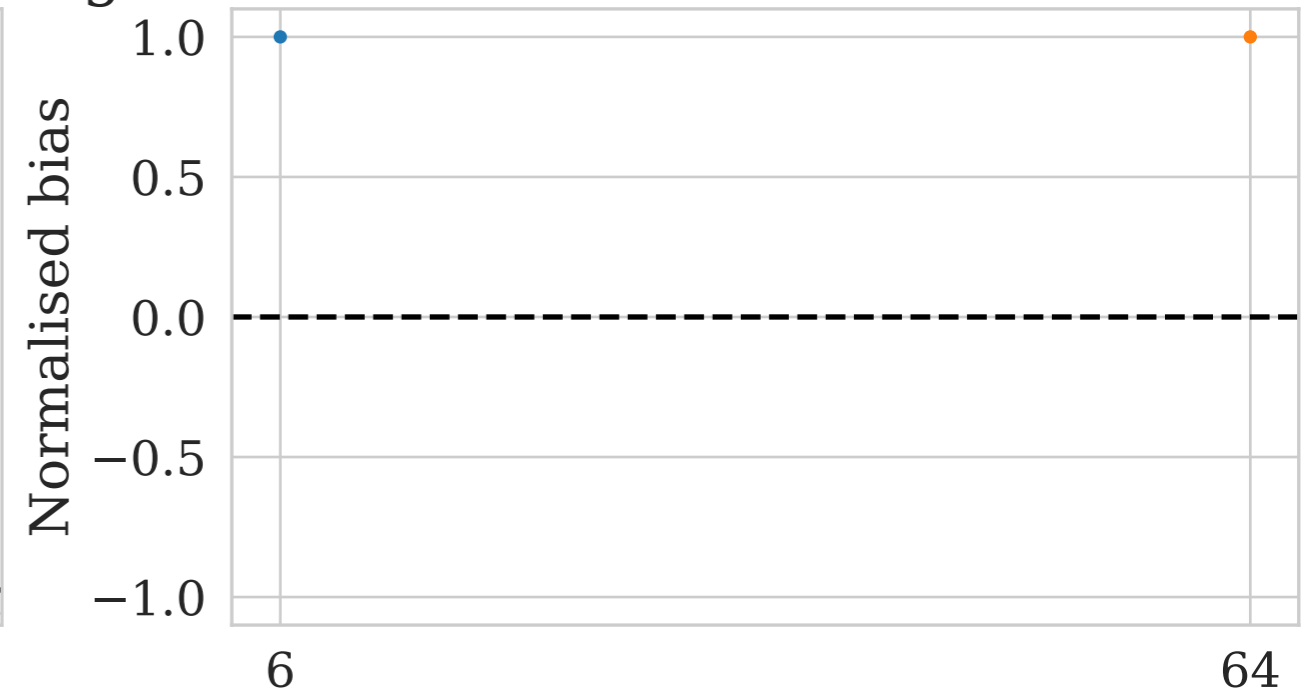

Class 0 Class 1

1728-uniform hypergraph, number of hyperedges: 1

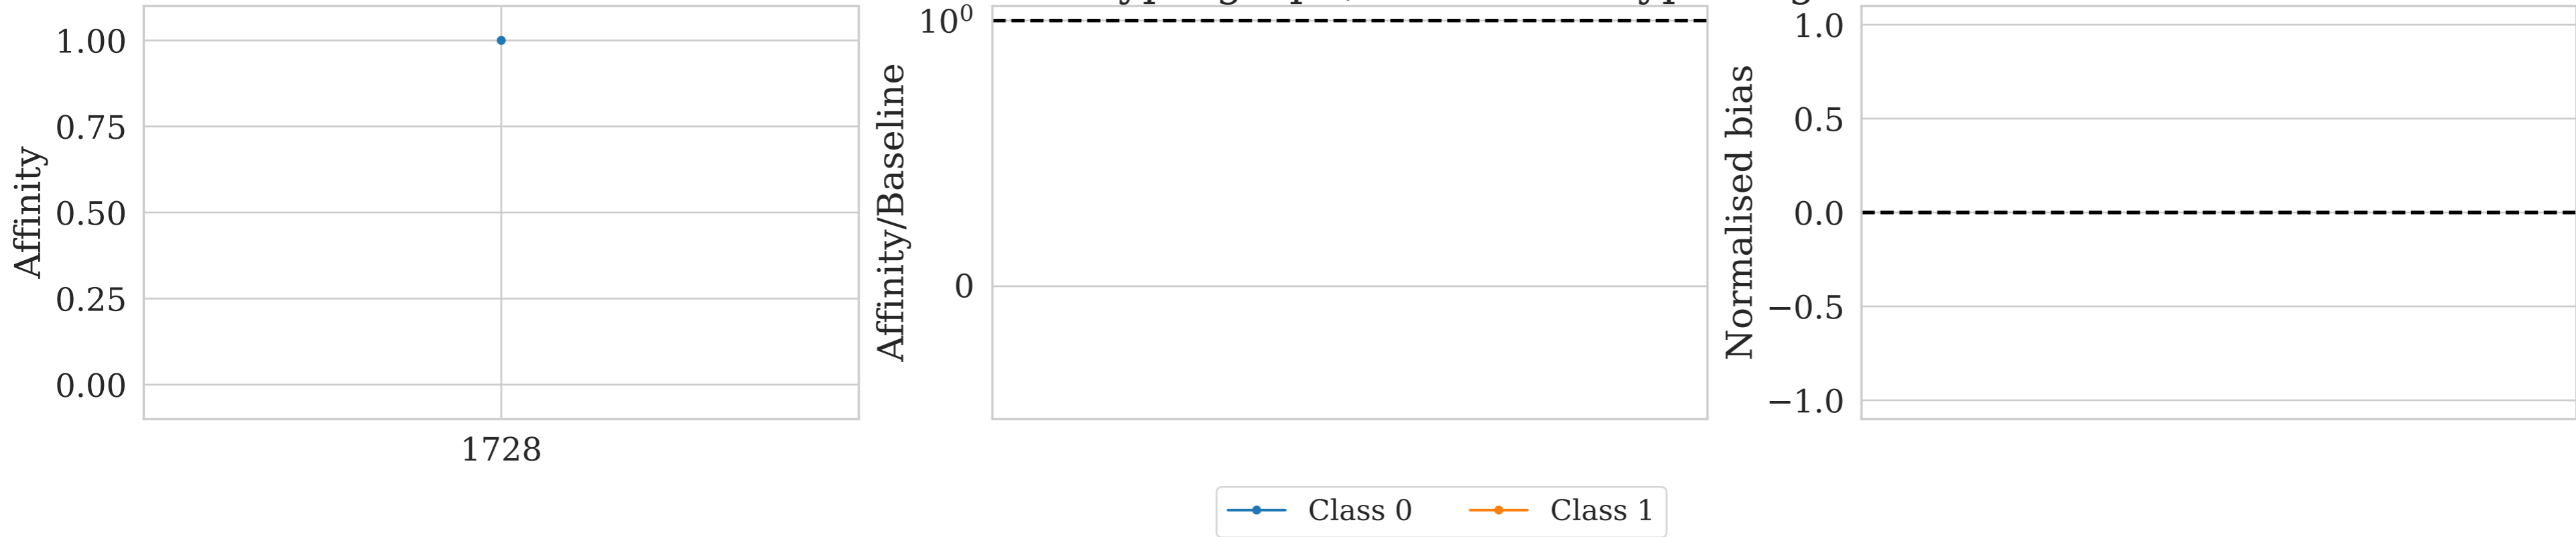

352-uniform hypergraph, number of hyperedges: 1

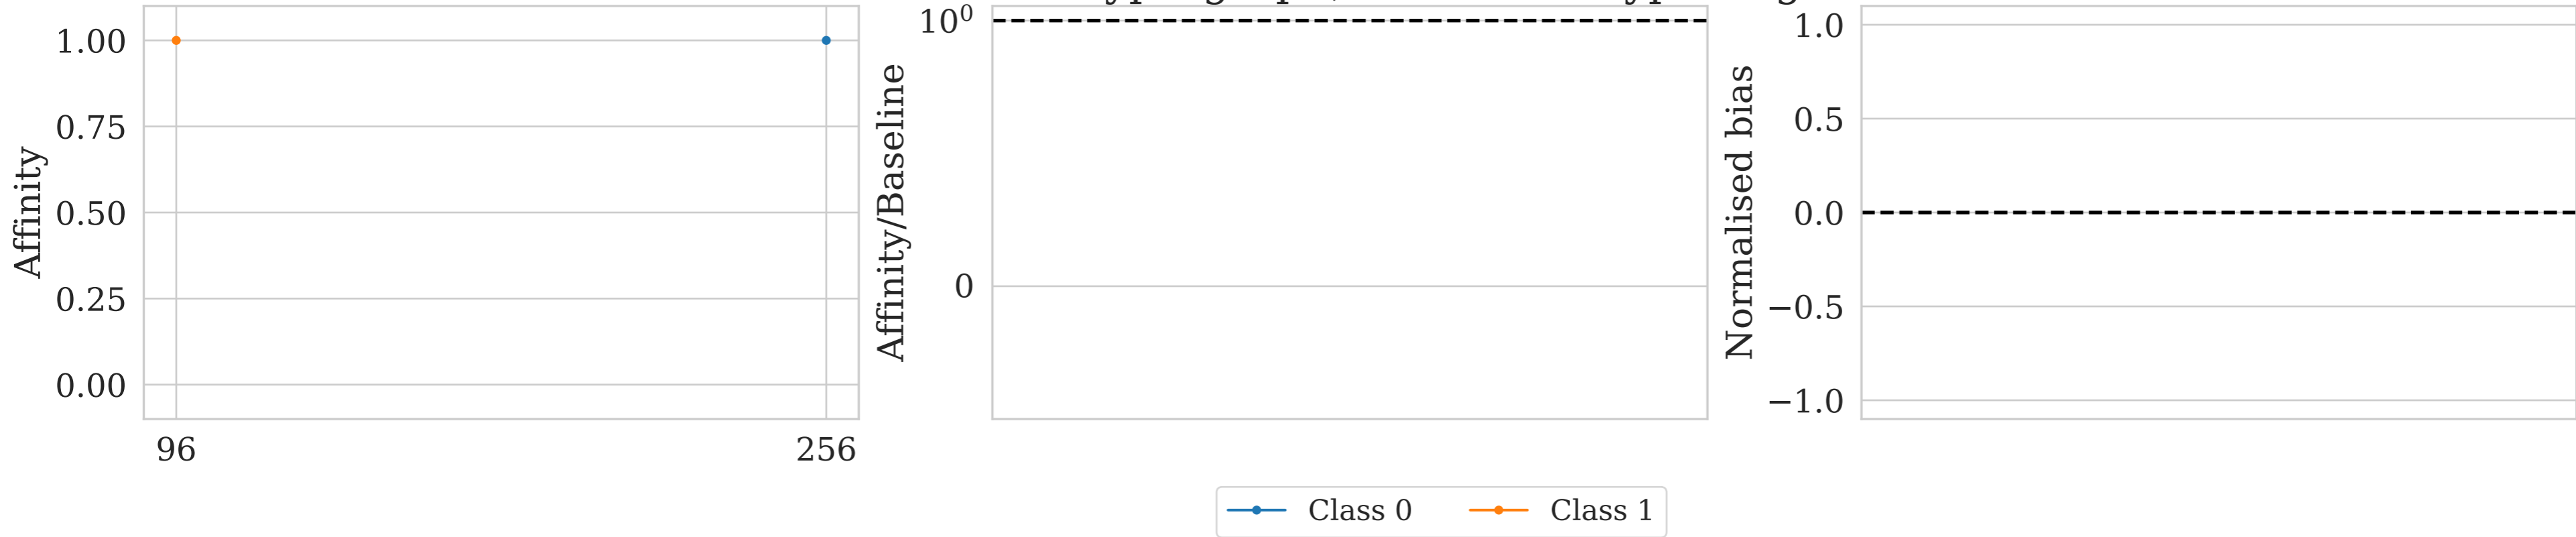

336-uniform hypergraph, number of hyperedges: 1

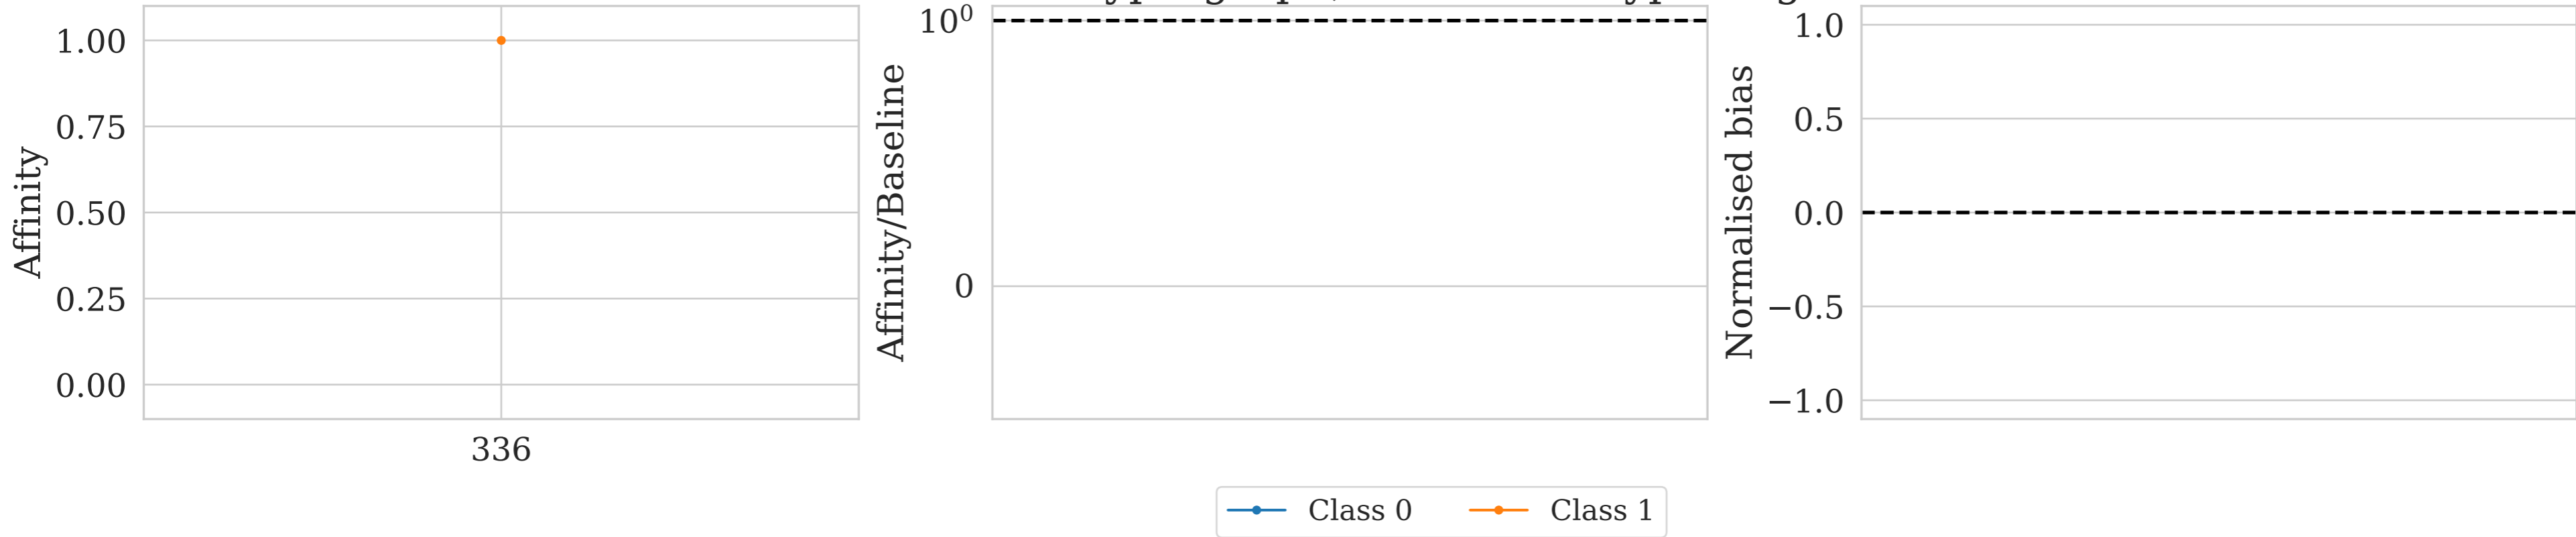

304-uniform hypergraph, number of hyperedges: 1

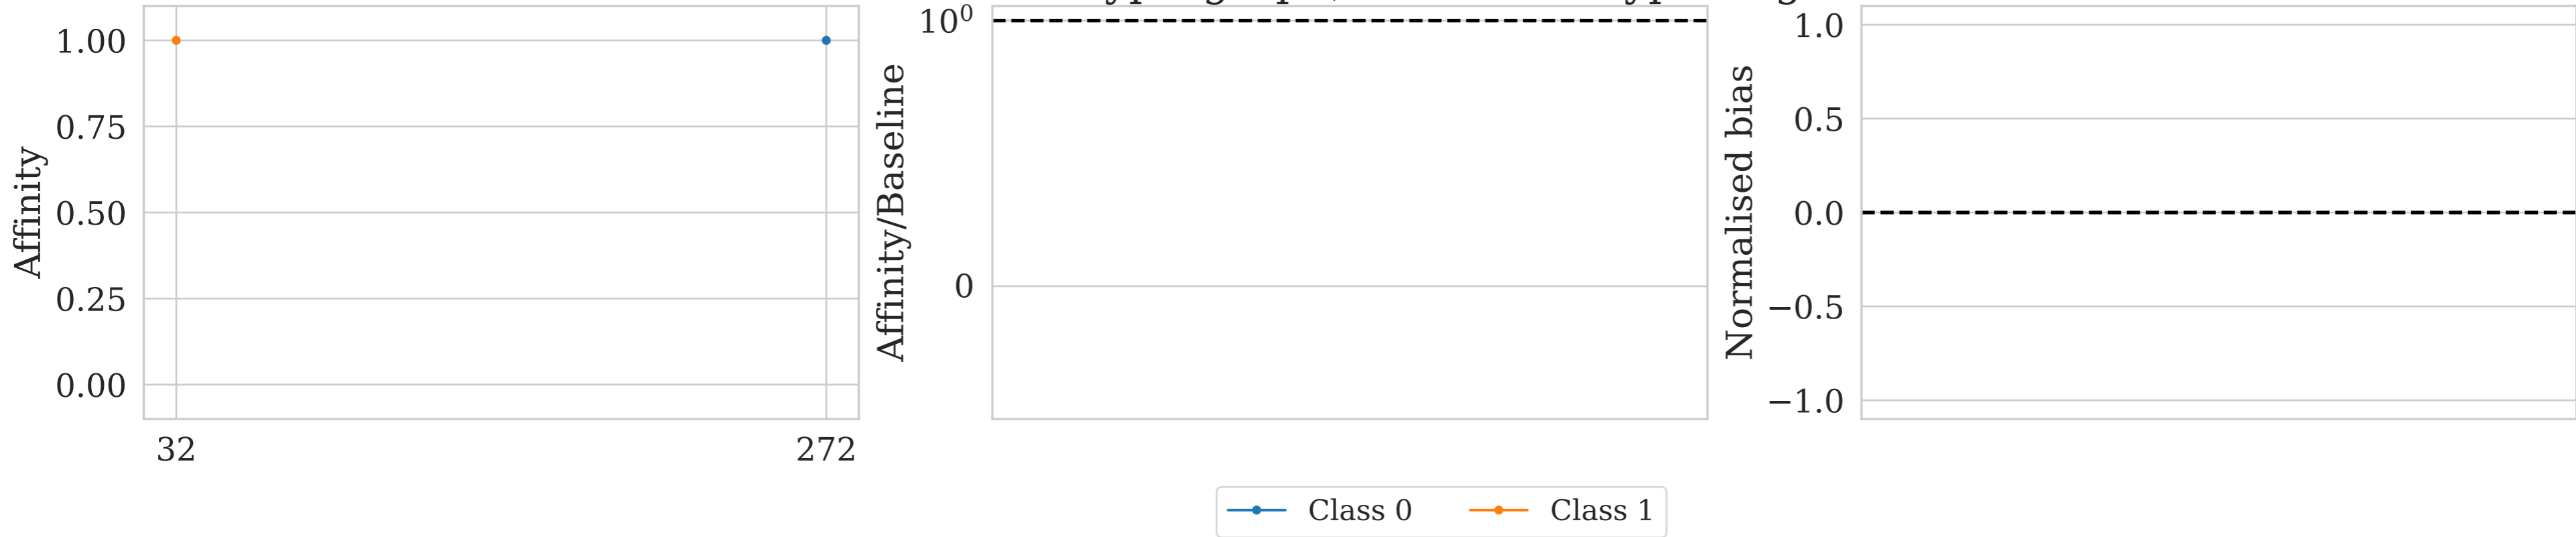

298-uniform hypergraph, number of hyperedges: 1

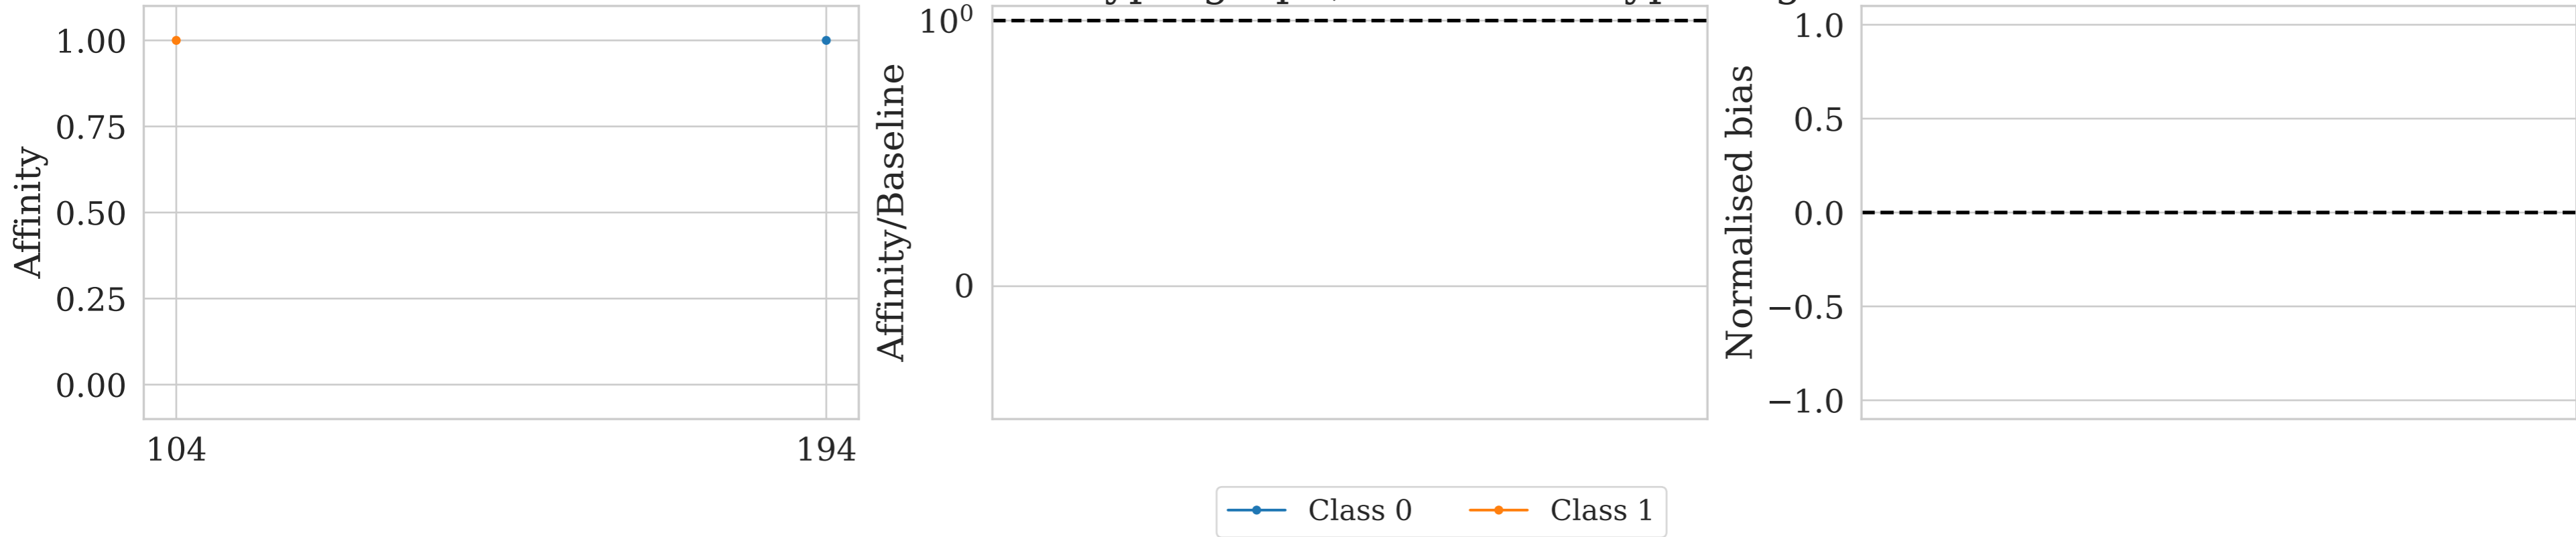

242-uniform hypergraph, number of hyperedges: 1

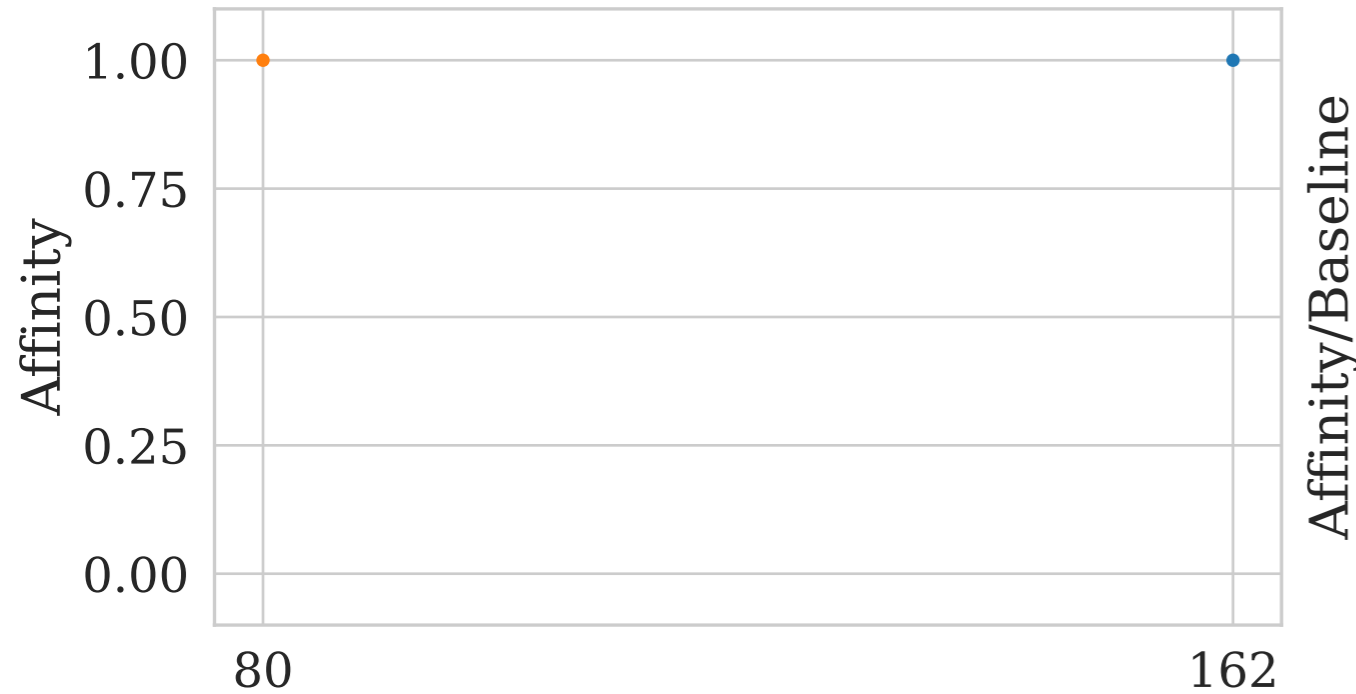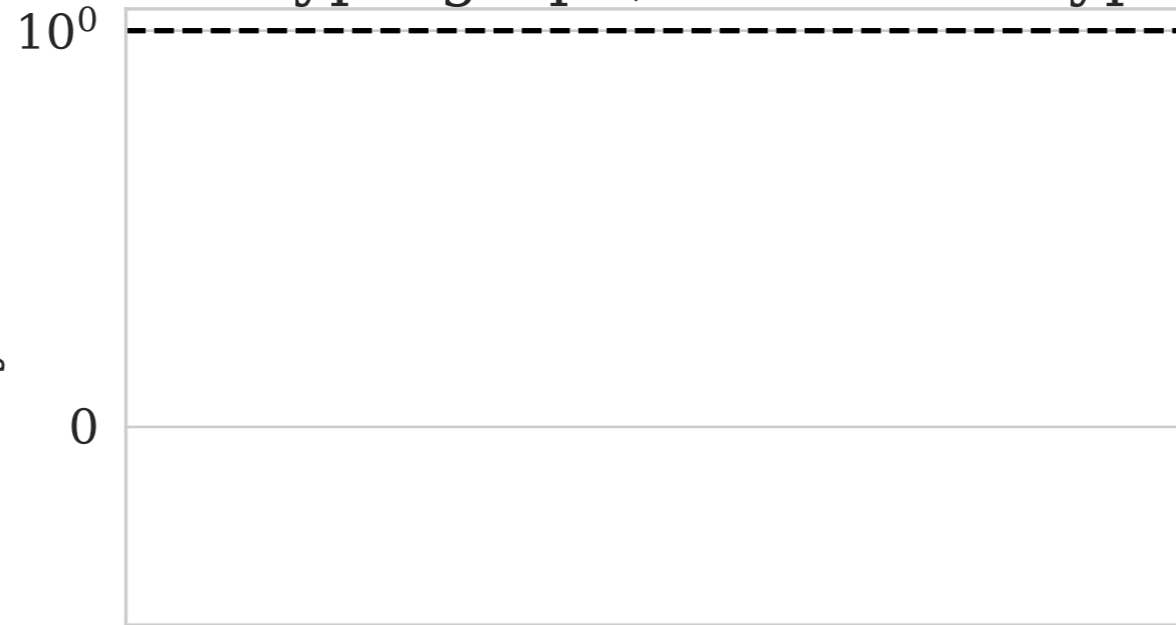

Class 0 Class 1

194-uniform hypergraph, number of hyperedges: 1

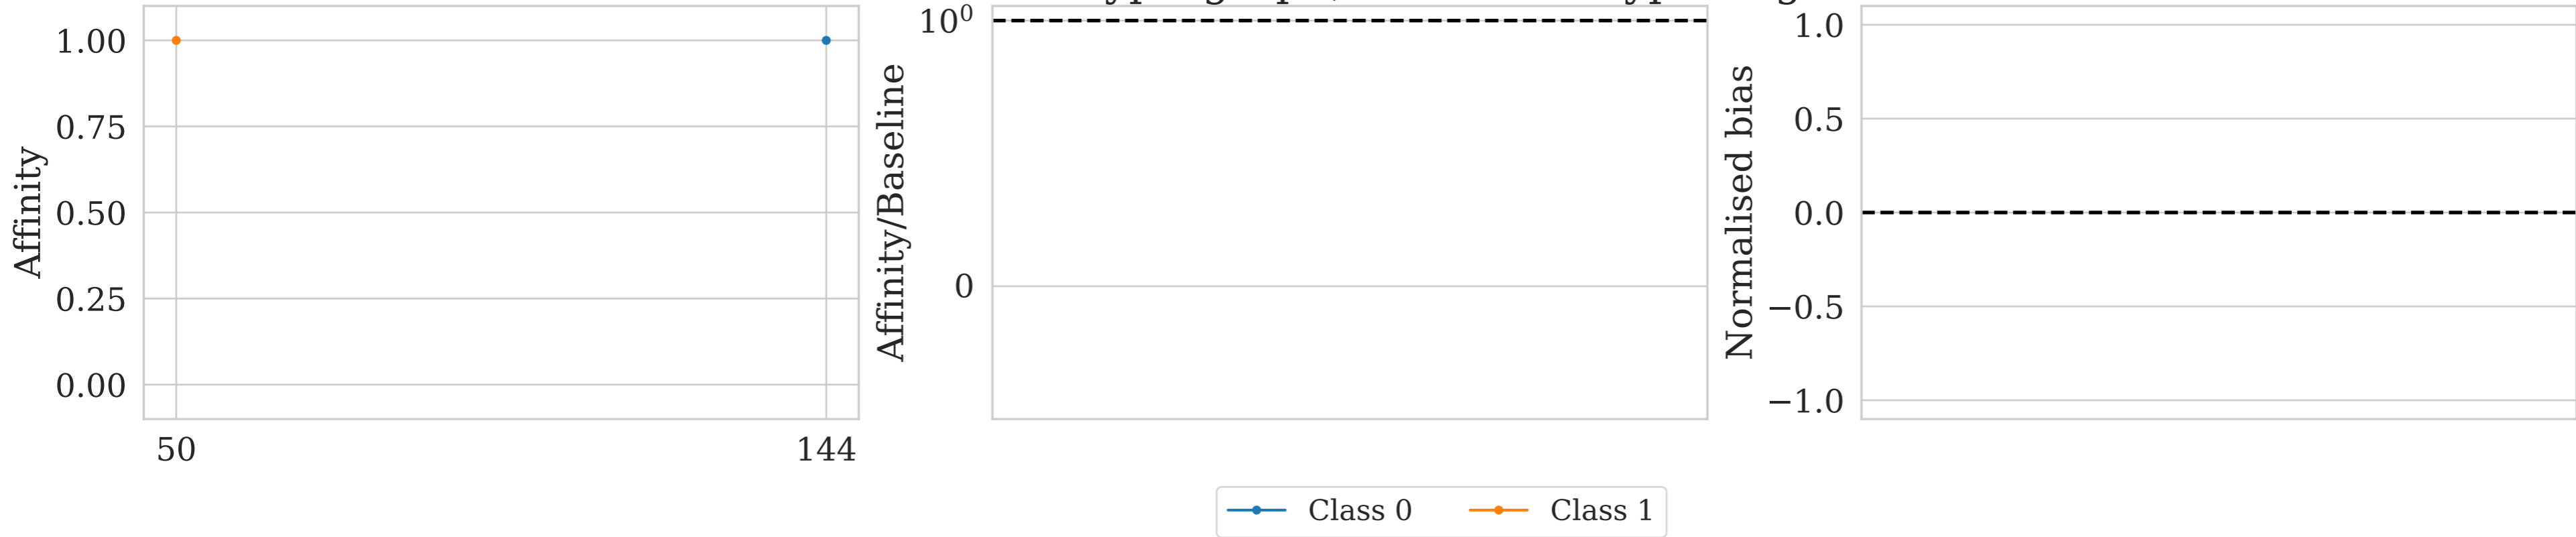

166-uniform hypergraph, number of hyperedges: 1

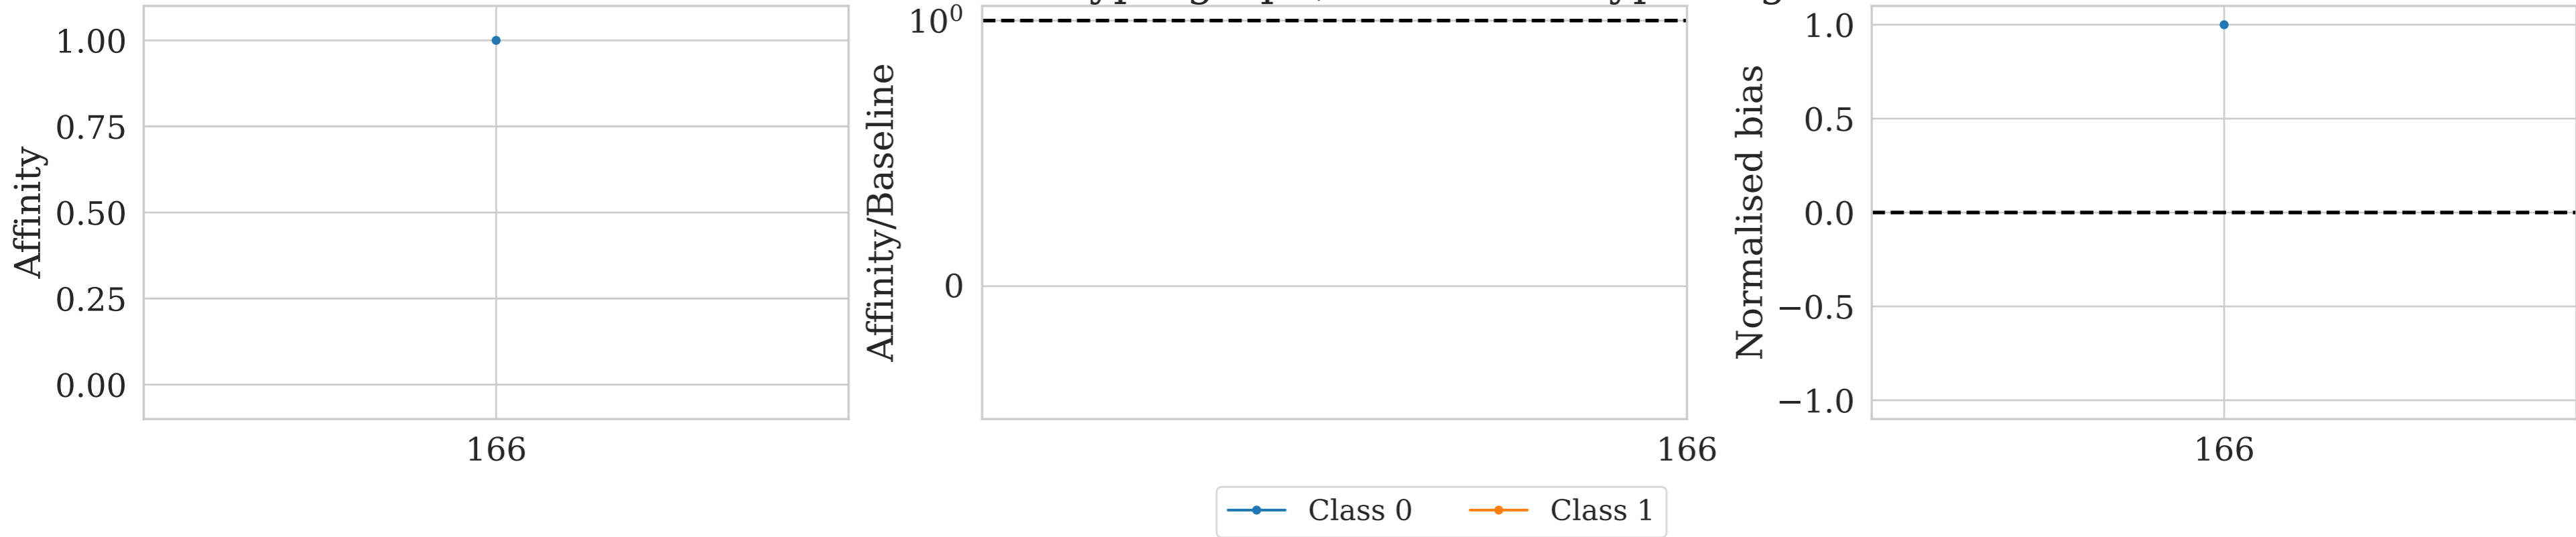

128-uniform hypergraph, number of hyperedges: 1

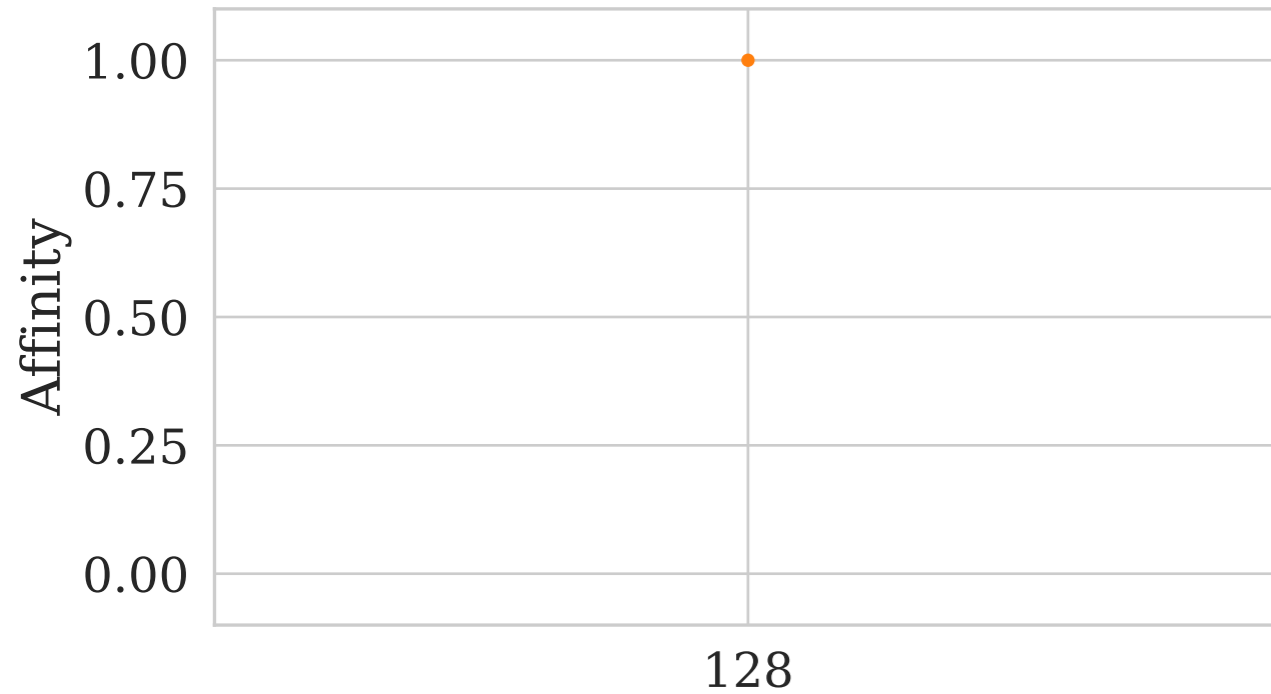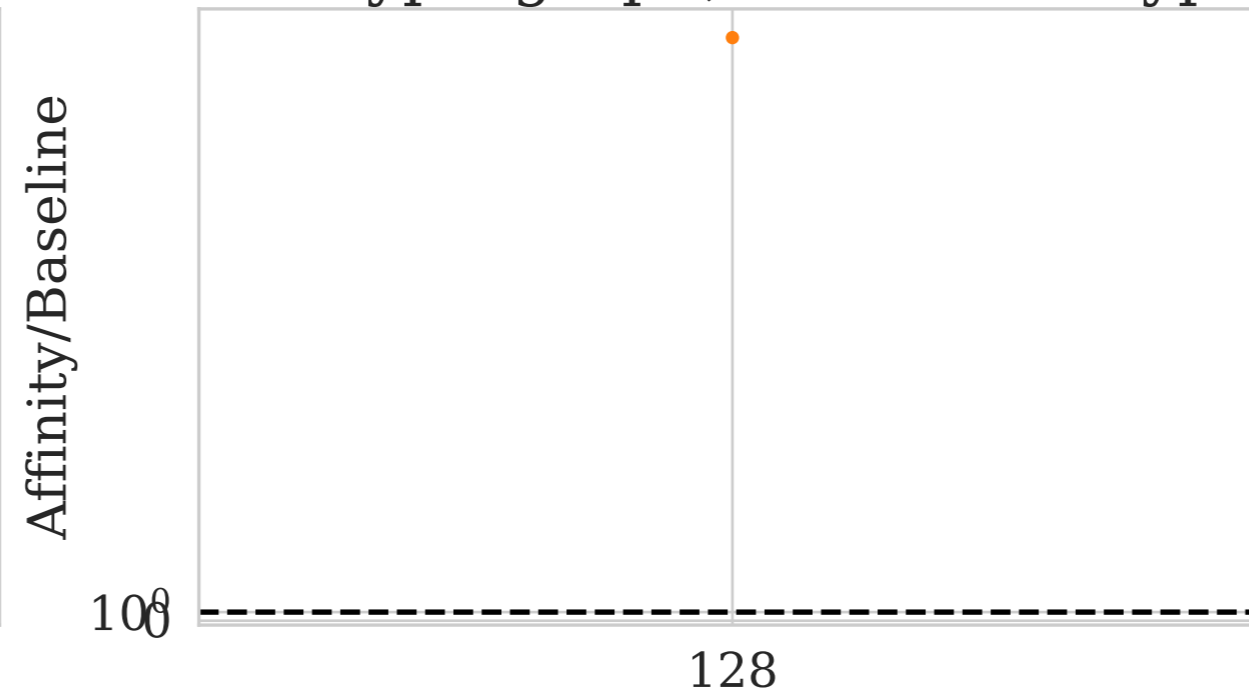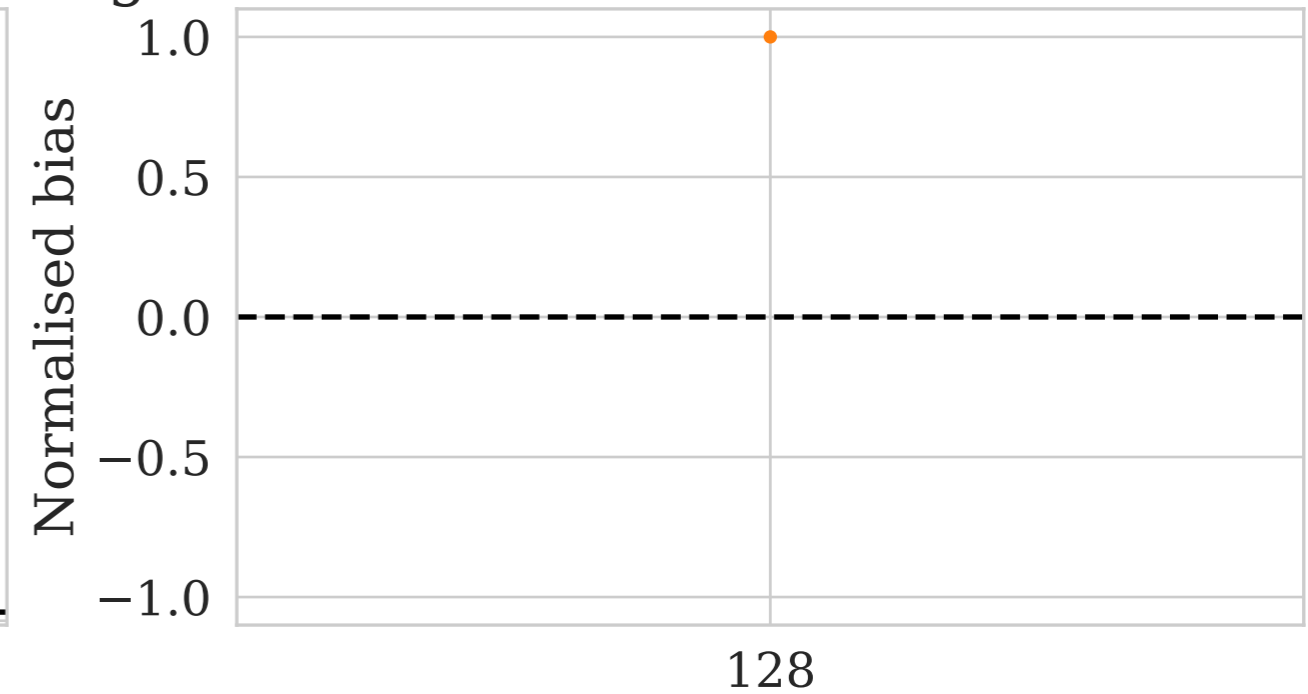

Class 0 Class 1

71-uniform hypergraph, number of hyperedges: 1

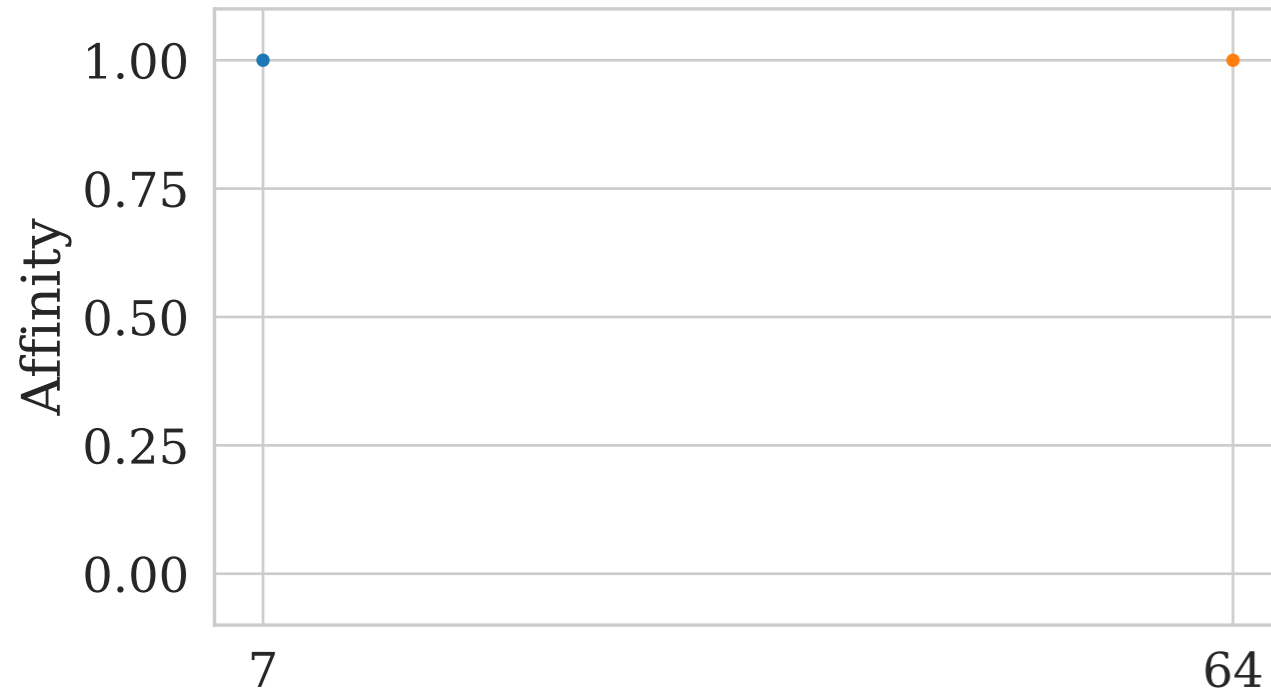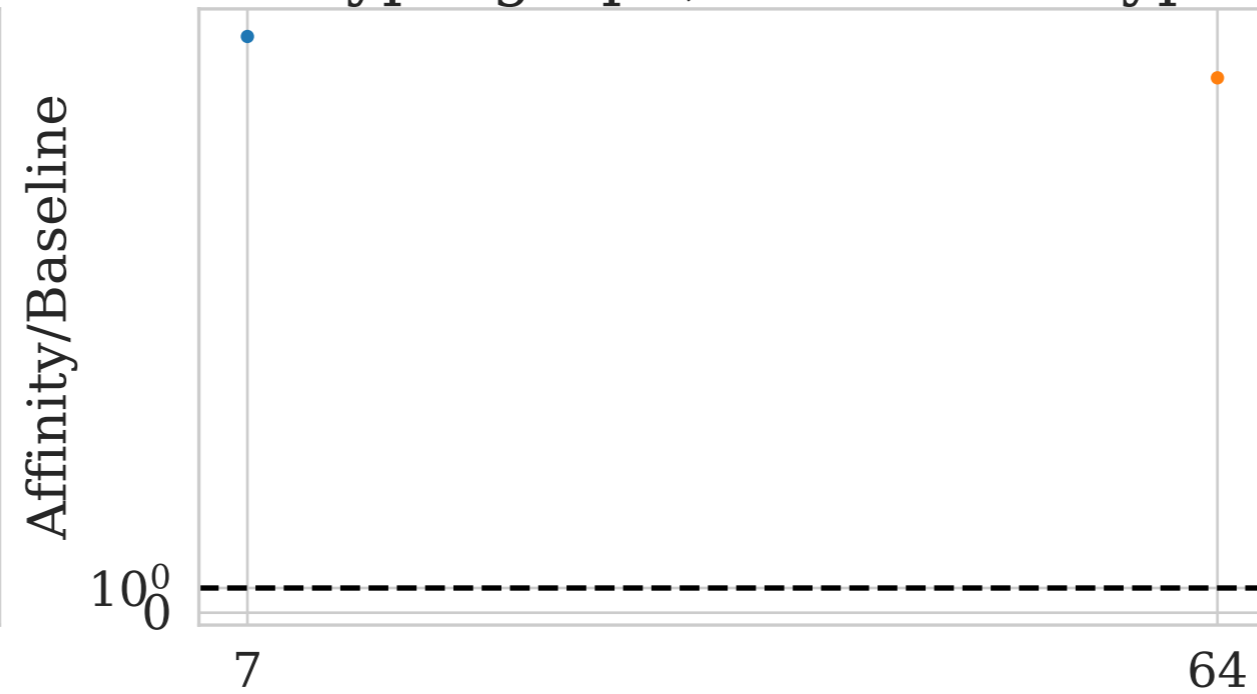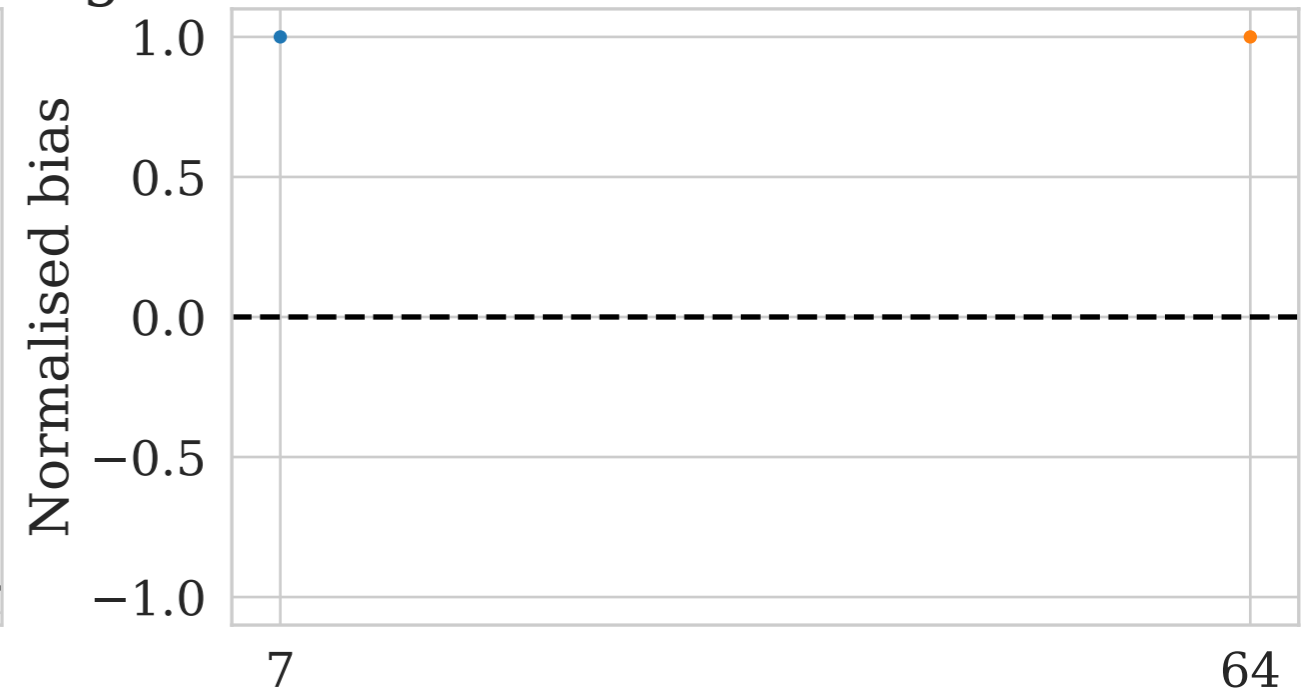

Class 0 Class 1

124-uniform hypergraph, number of hyperedges: 1

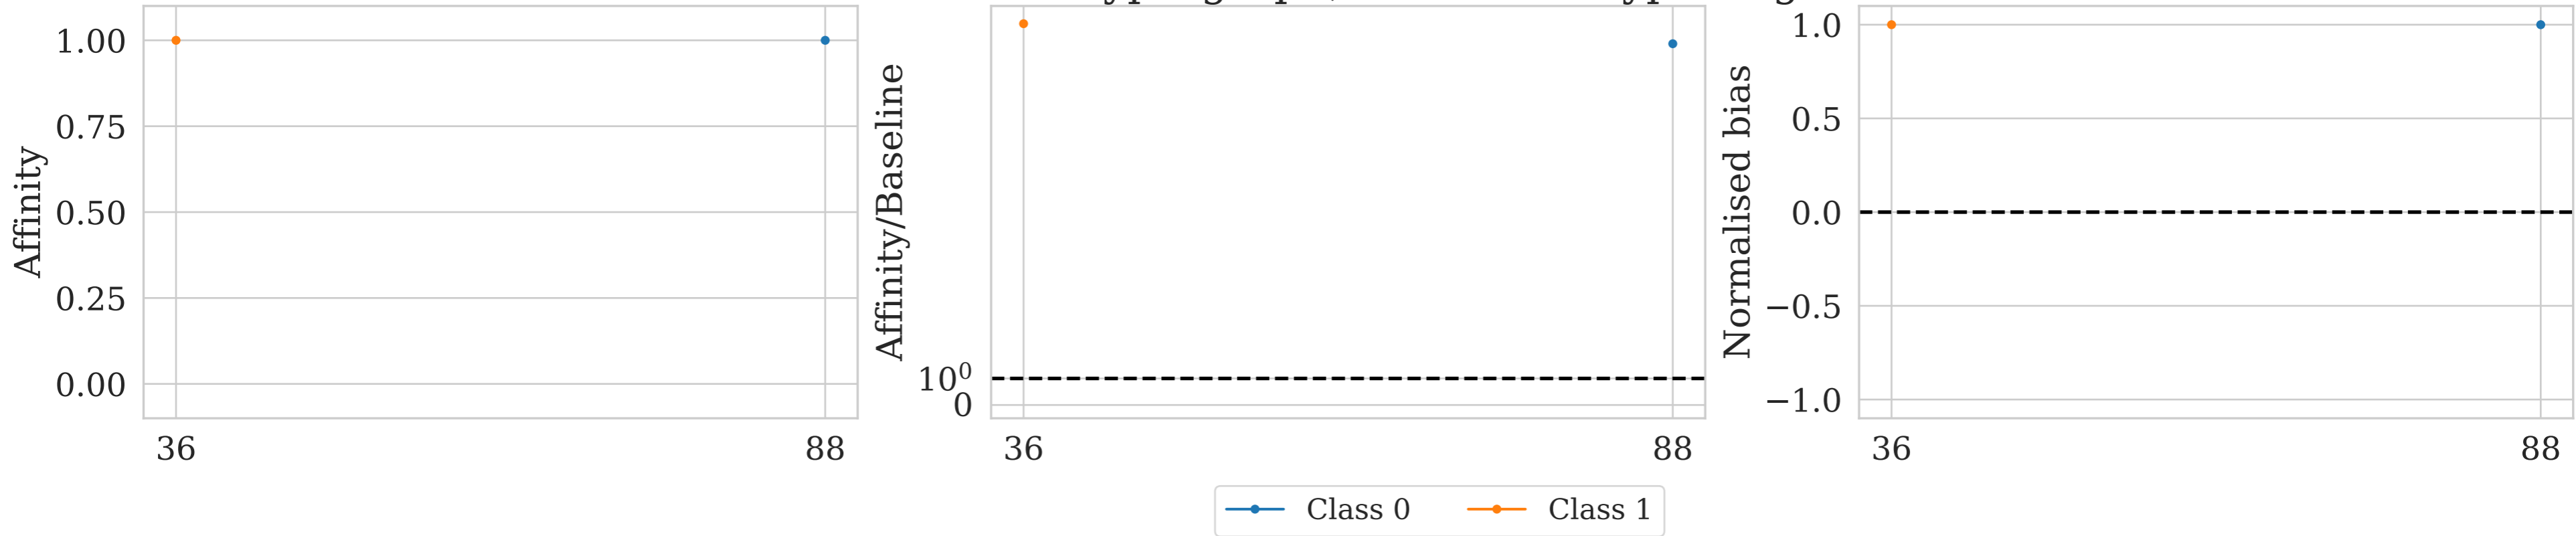

432-uniform hypergraph, number of hyperedges: 1

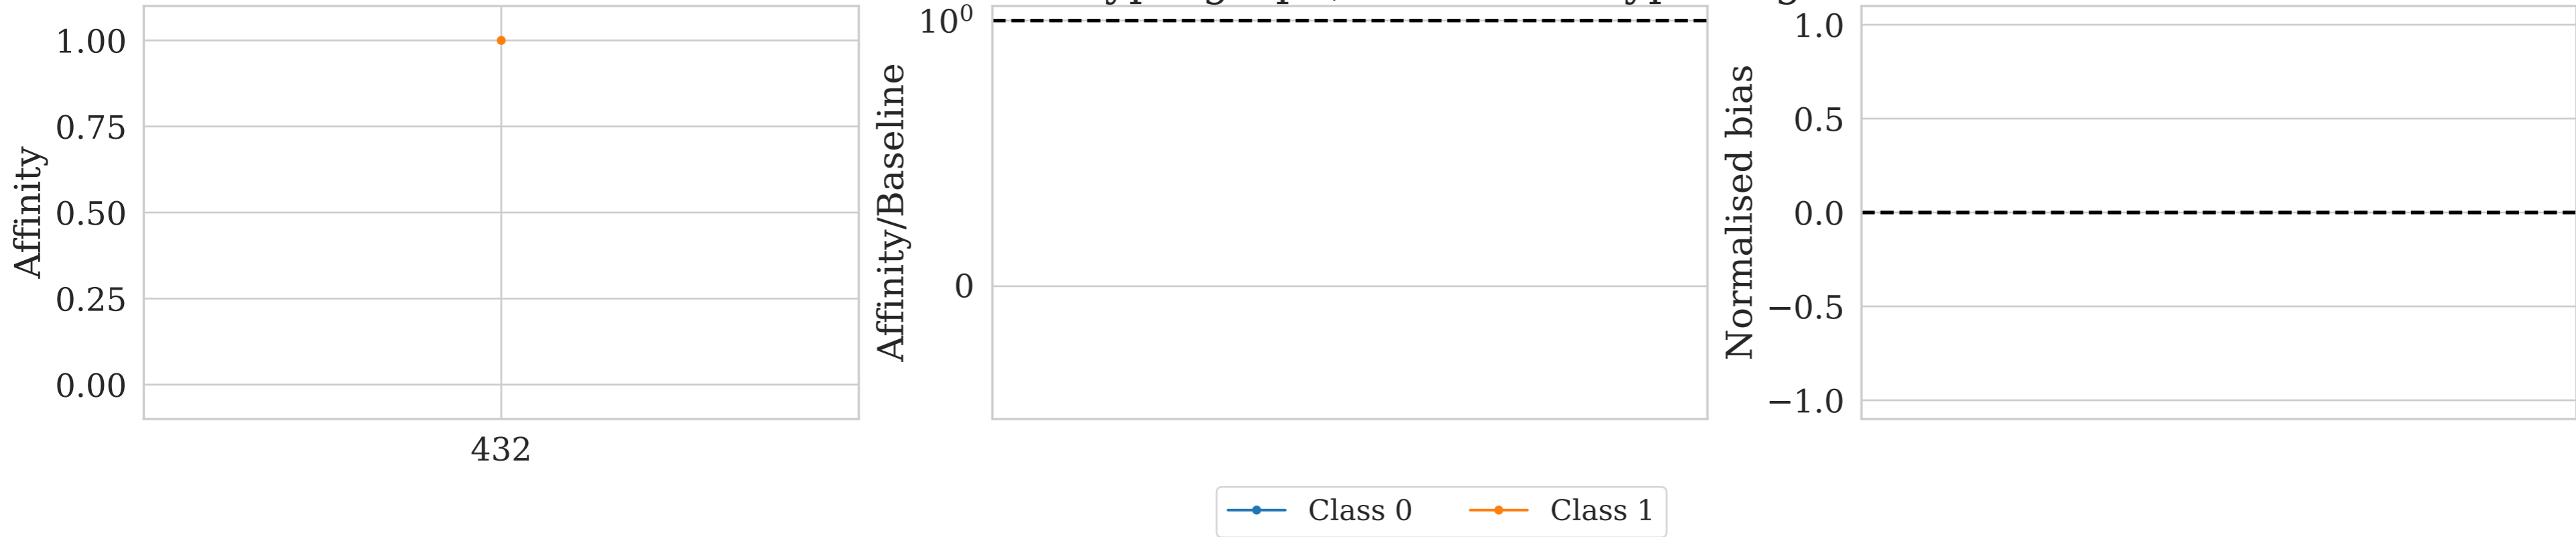

98-uniform hypergraph, number of hyperedges: 1

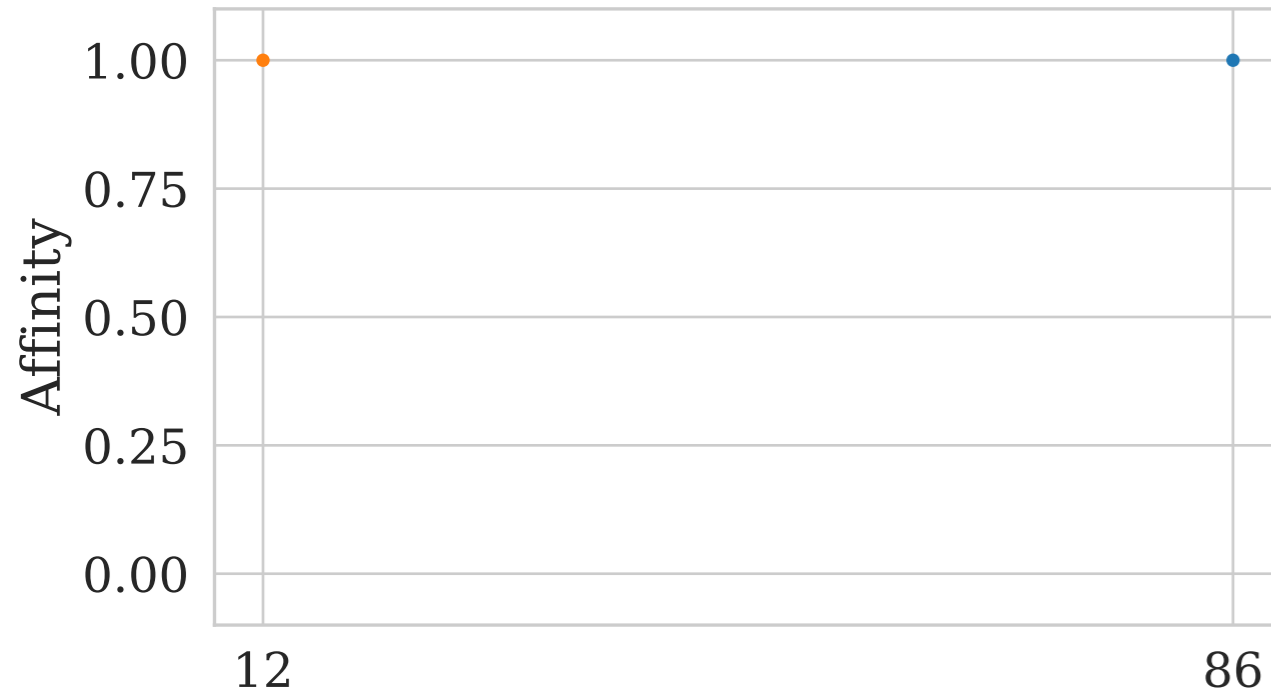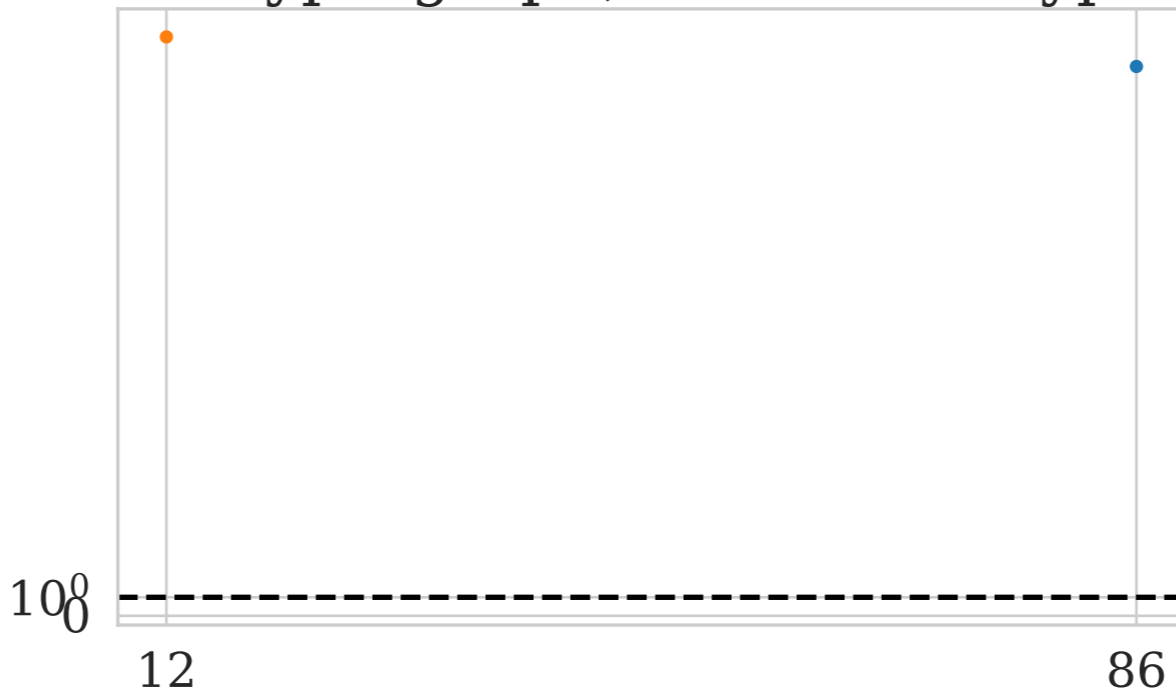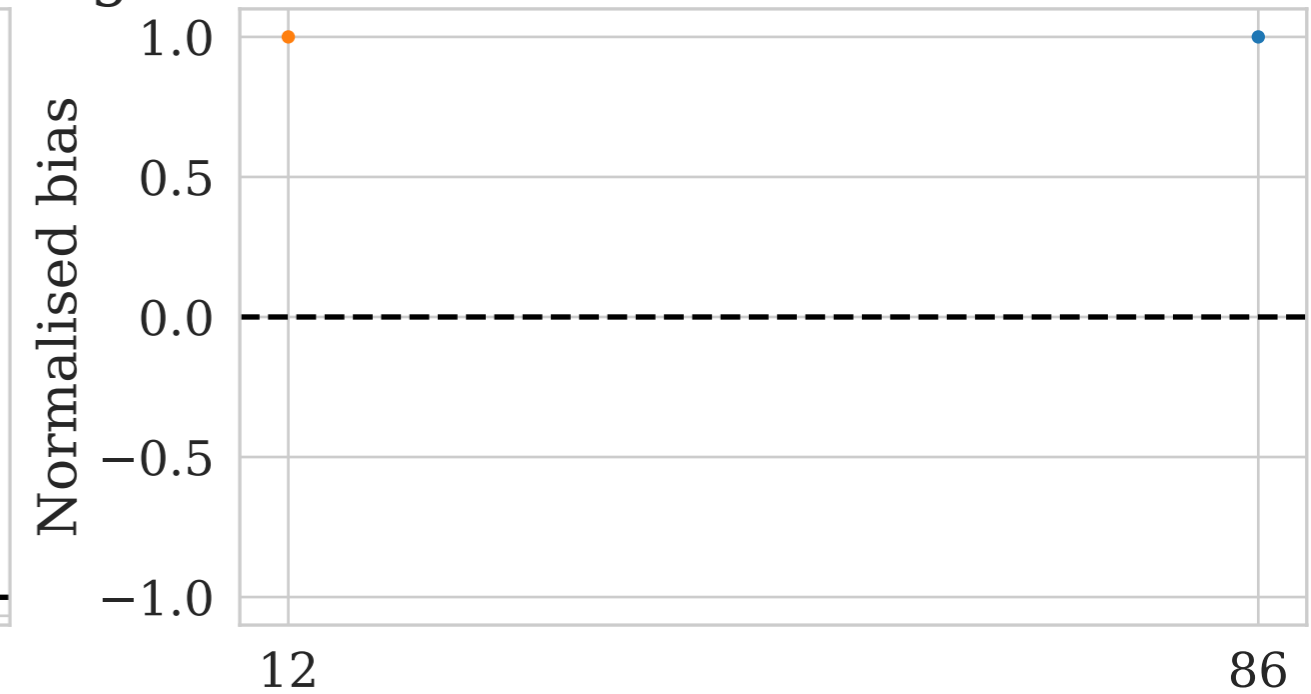

Class 0 Class 1

512-uniform hypergraph, number of hyperedges: 1

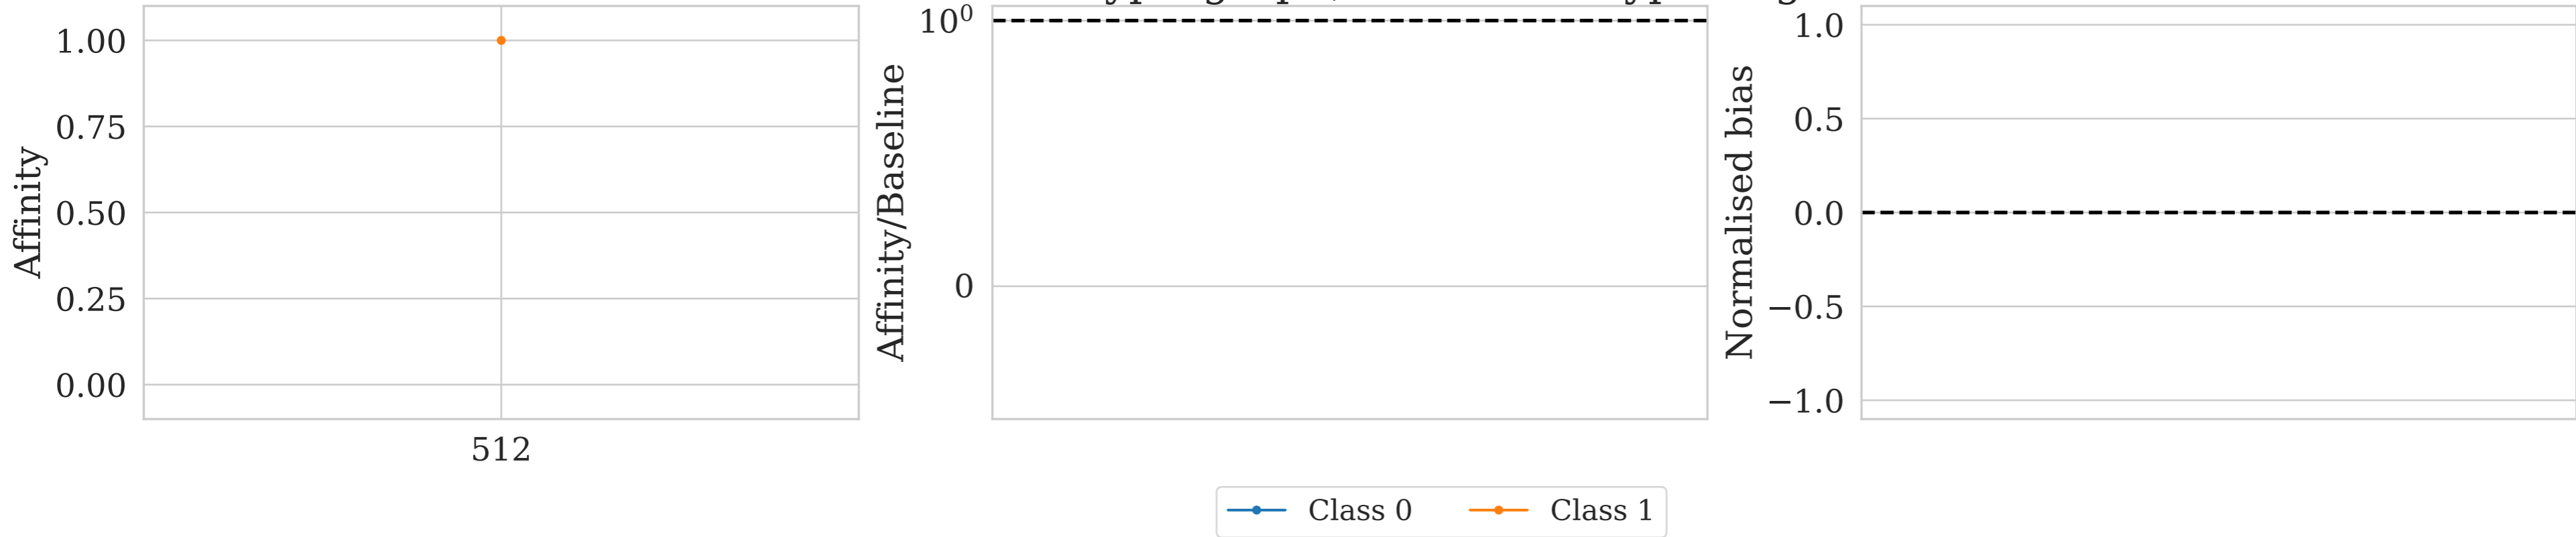

360-uniform hypergraph, number of hyperedges: 1

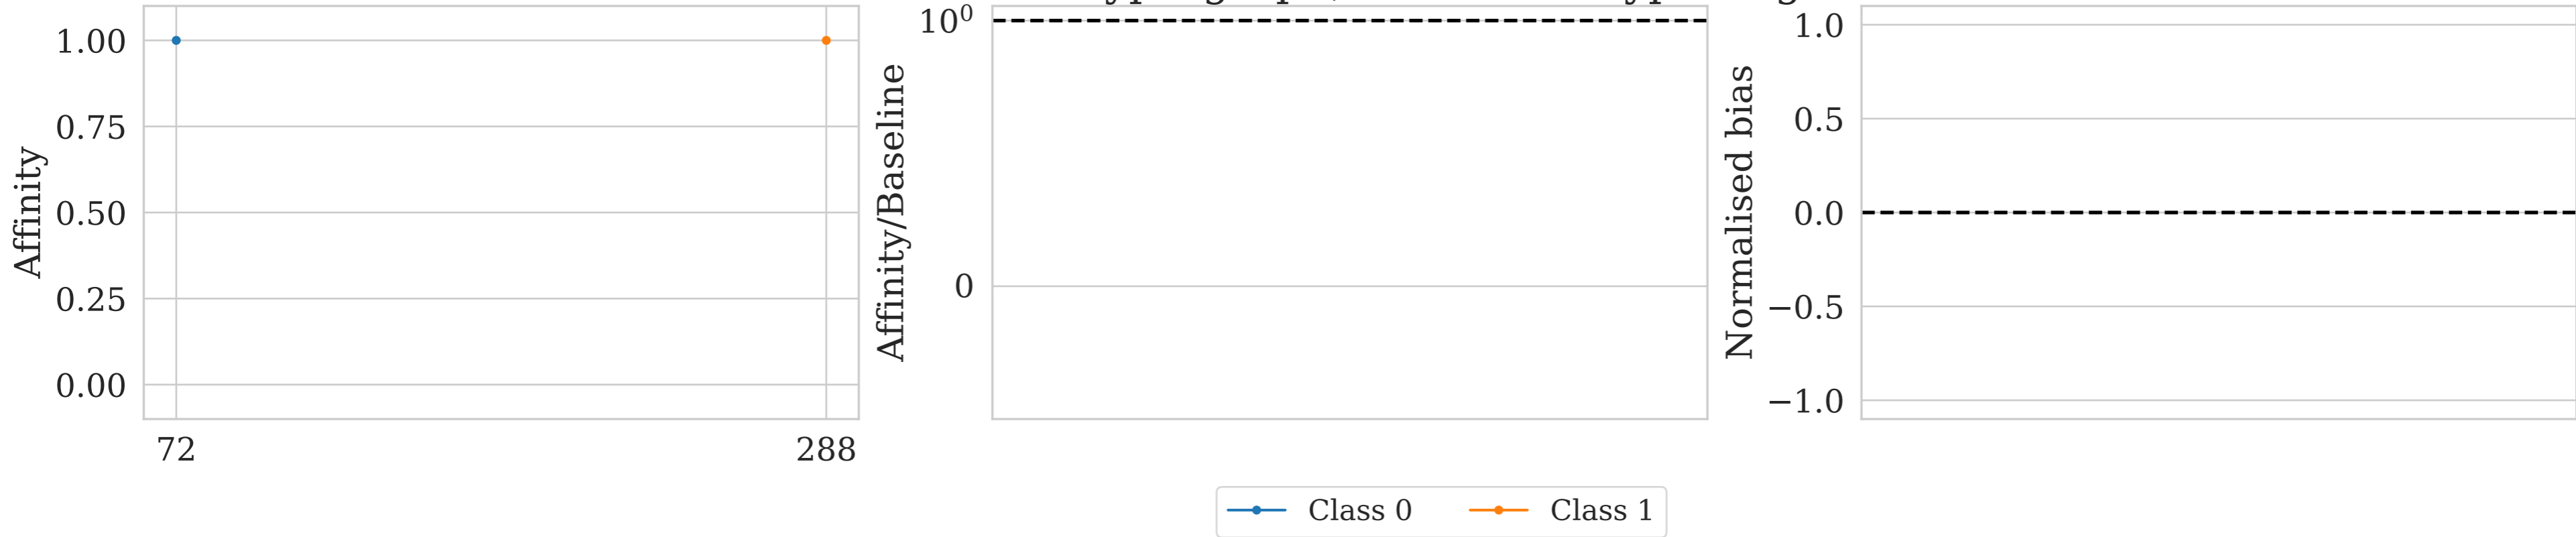

76-uniform hypergraph, number of hyperedges: 1

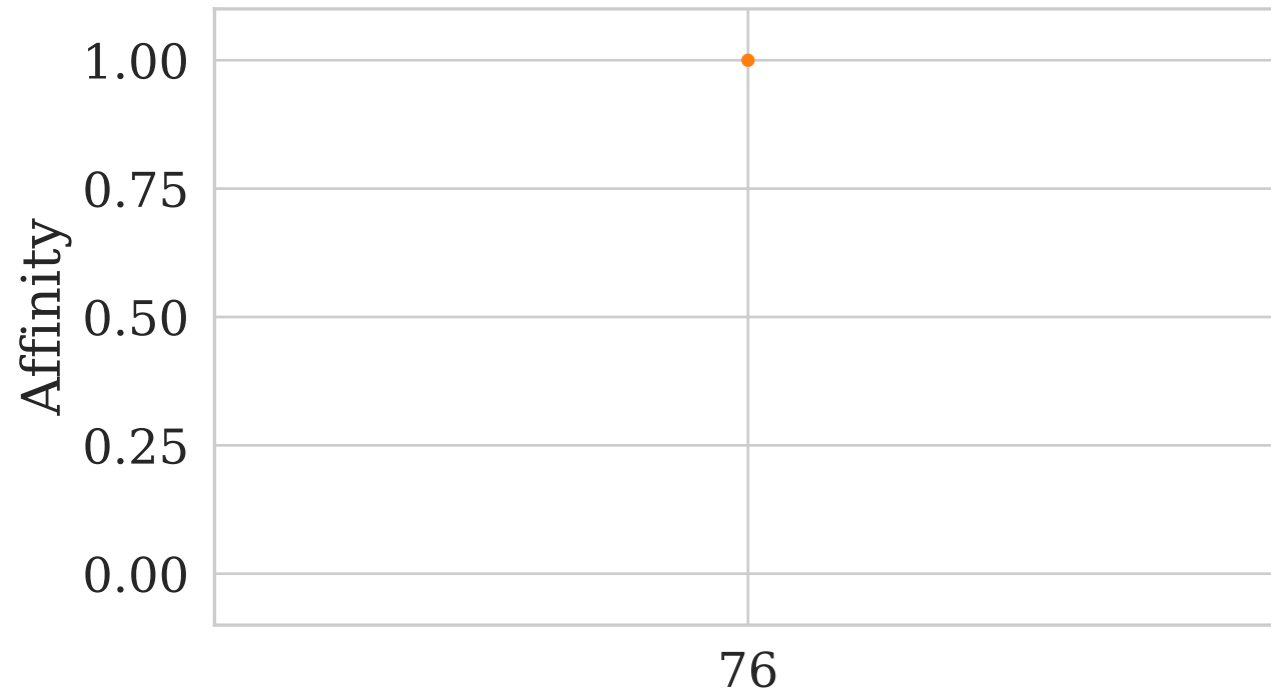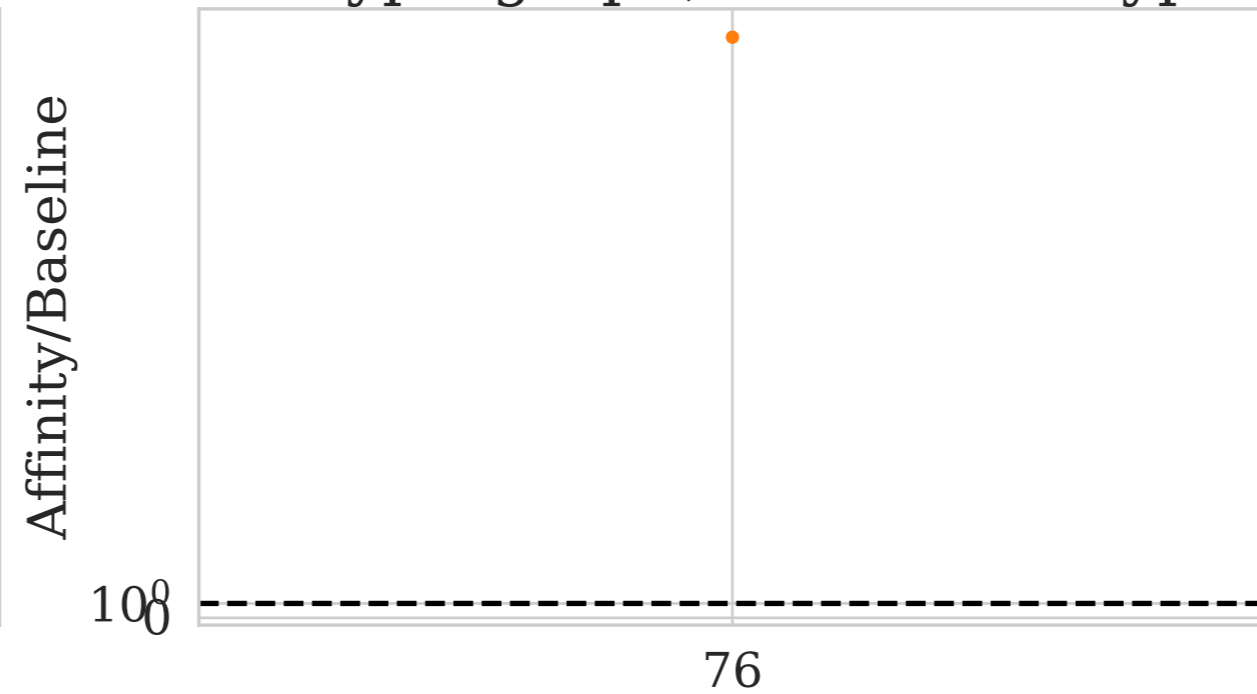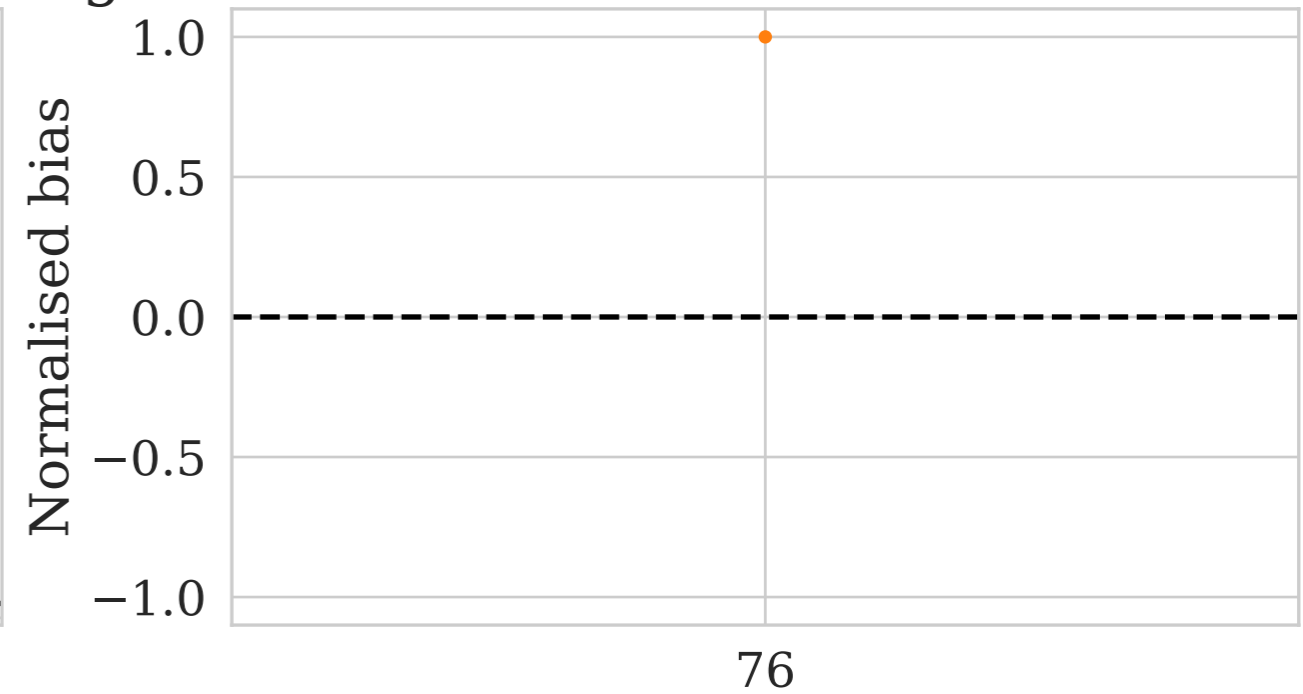

Class 0    Class 1

73-uniform hypergraph, number of hyperedges: 1

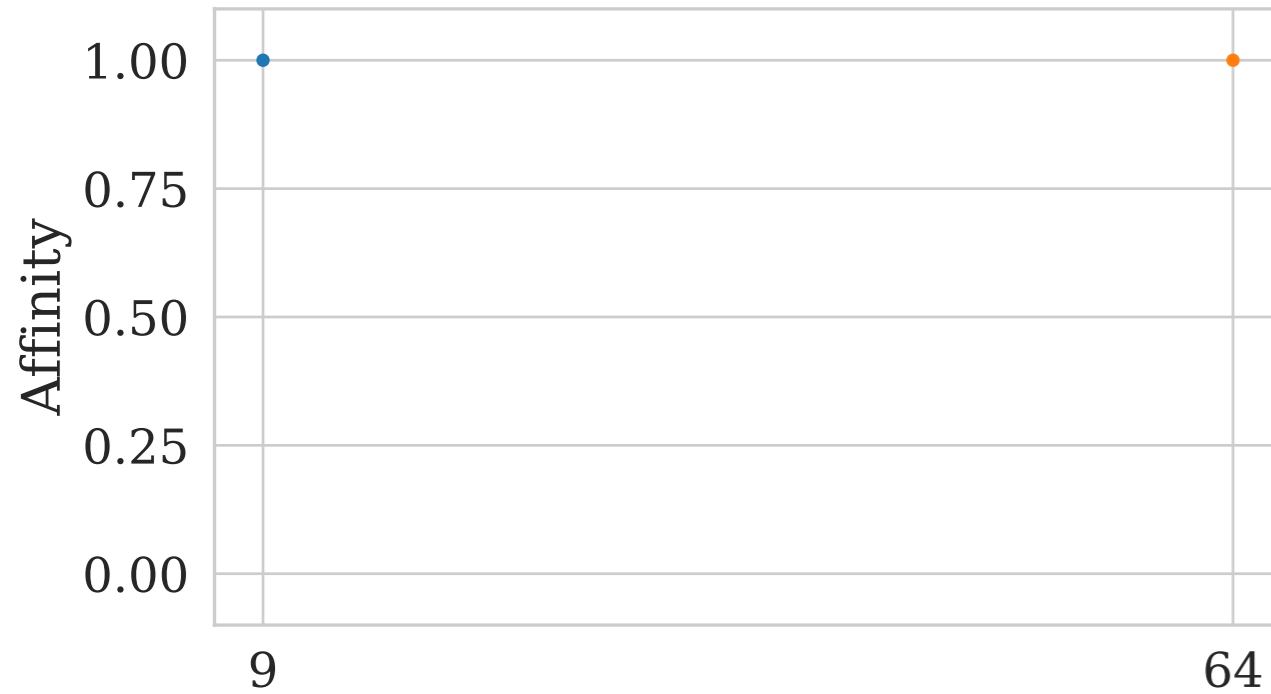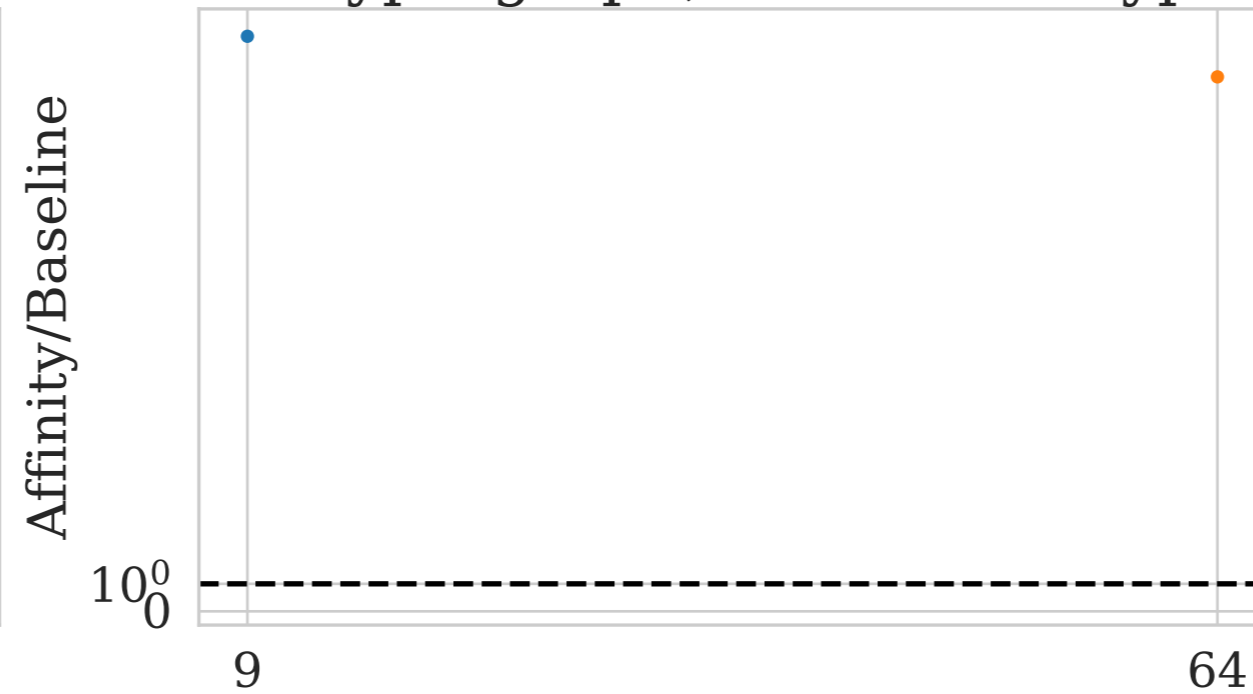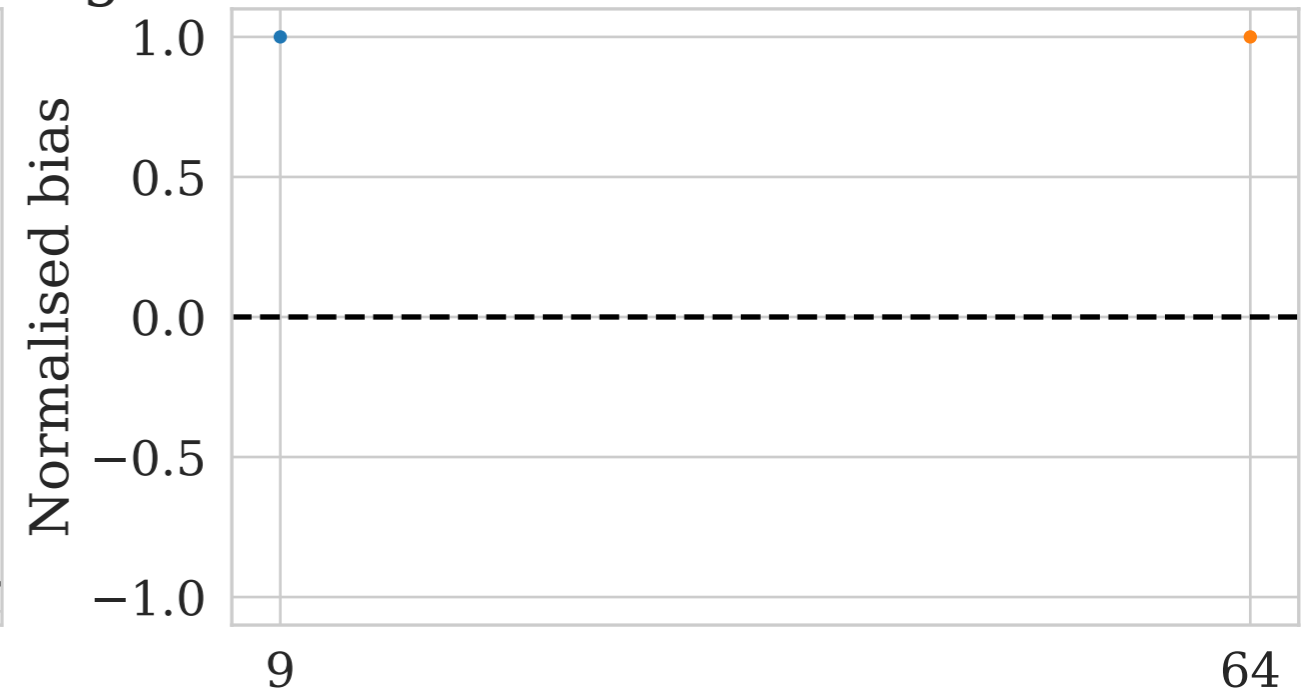

Class 0 Class 1

1808-uniform hypergraph, number of hyperedges: 1

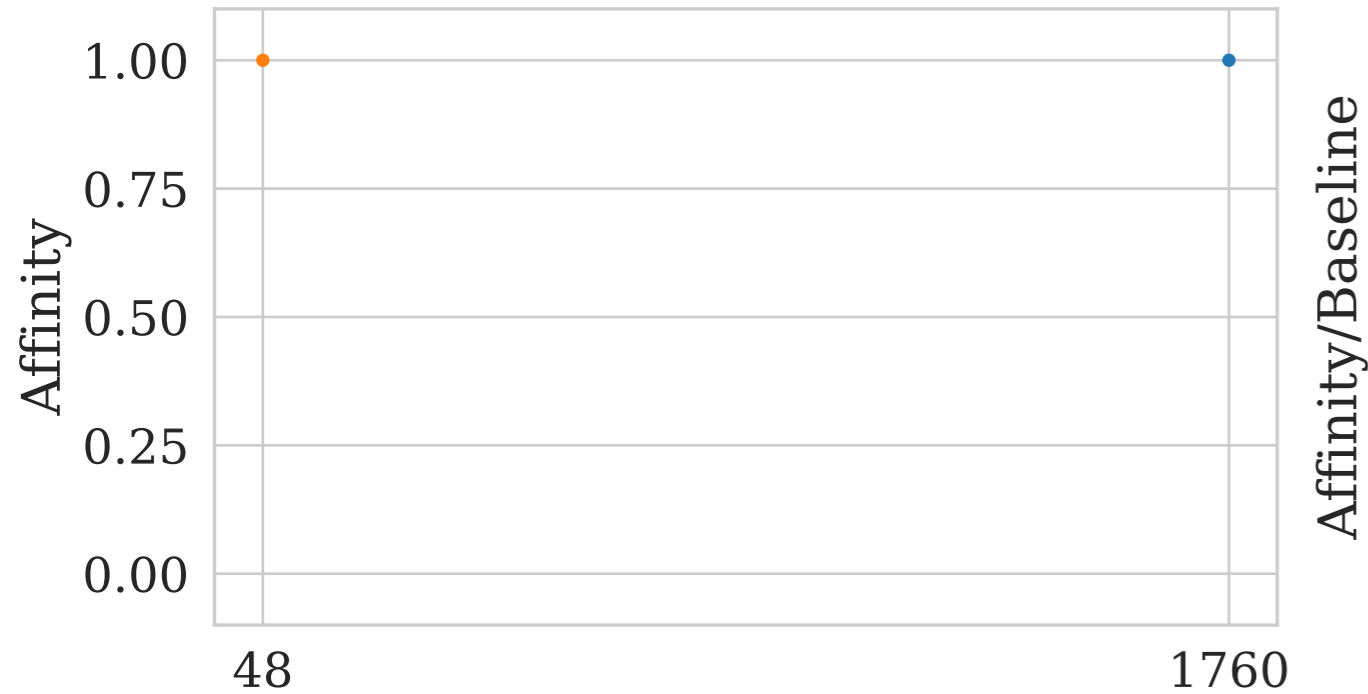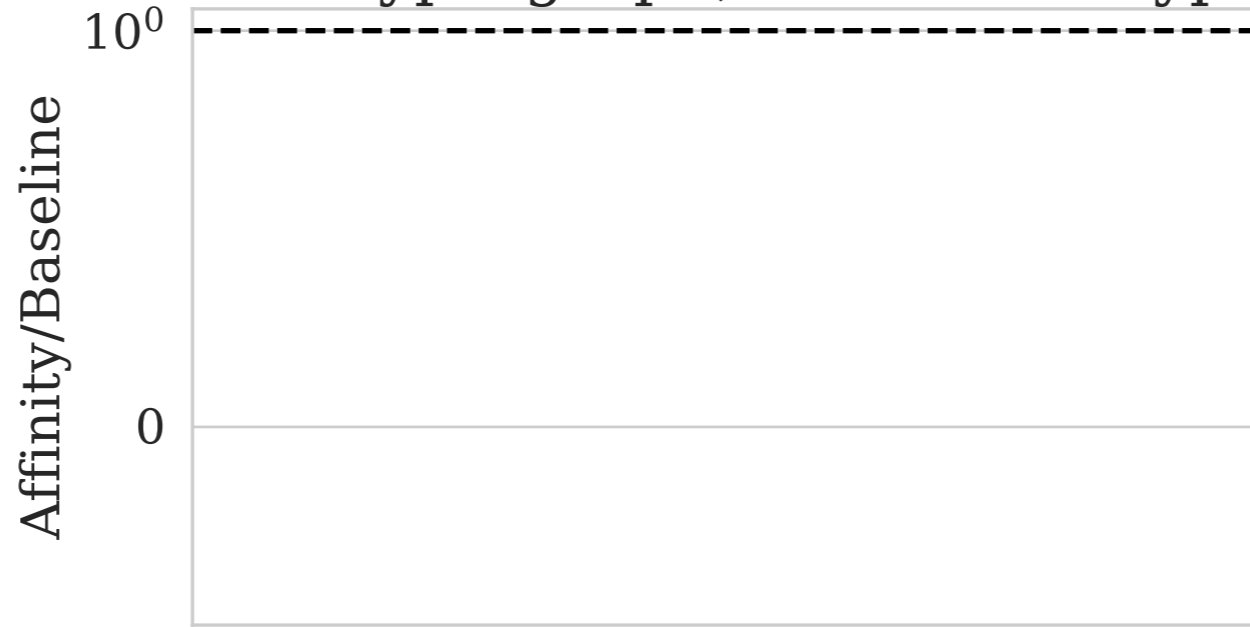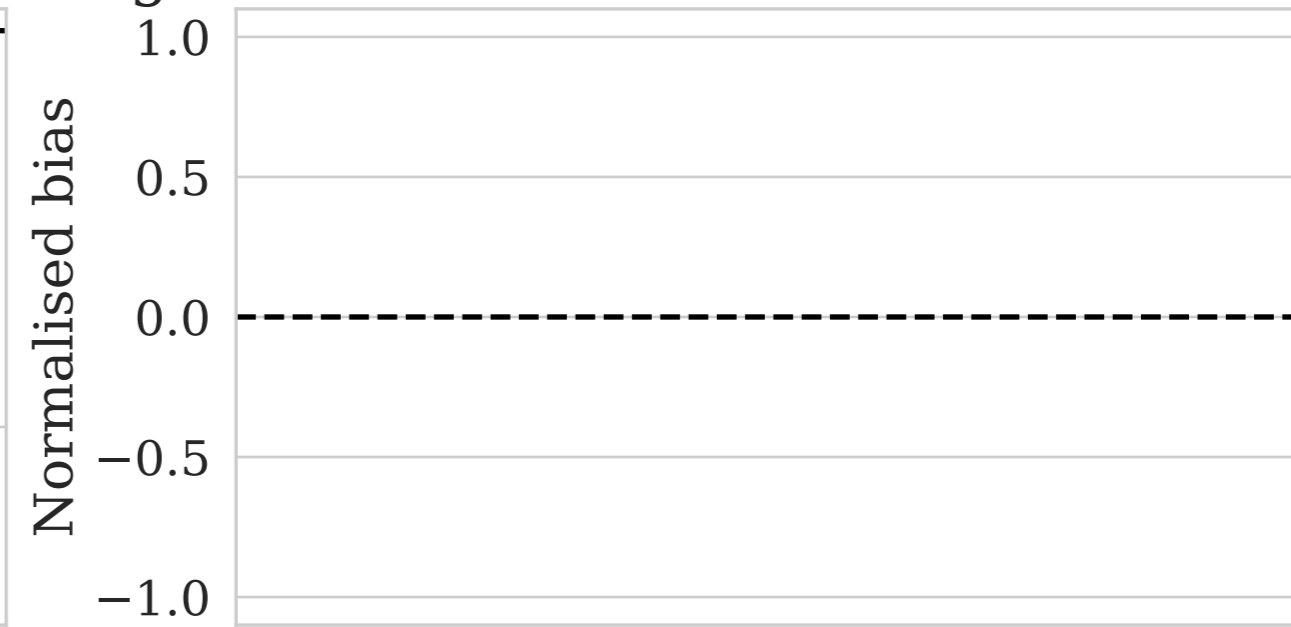

Class 0 Class 1
