# Supplementary material
Source: ML conference proceedings conference paper supplement (https://openreview.net/forum?id=YPpkFqMX6V)

2-uniform hypergraph, number of hyperedges: 623

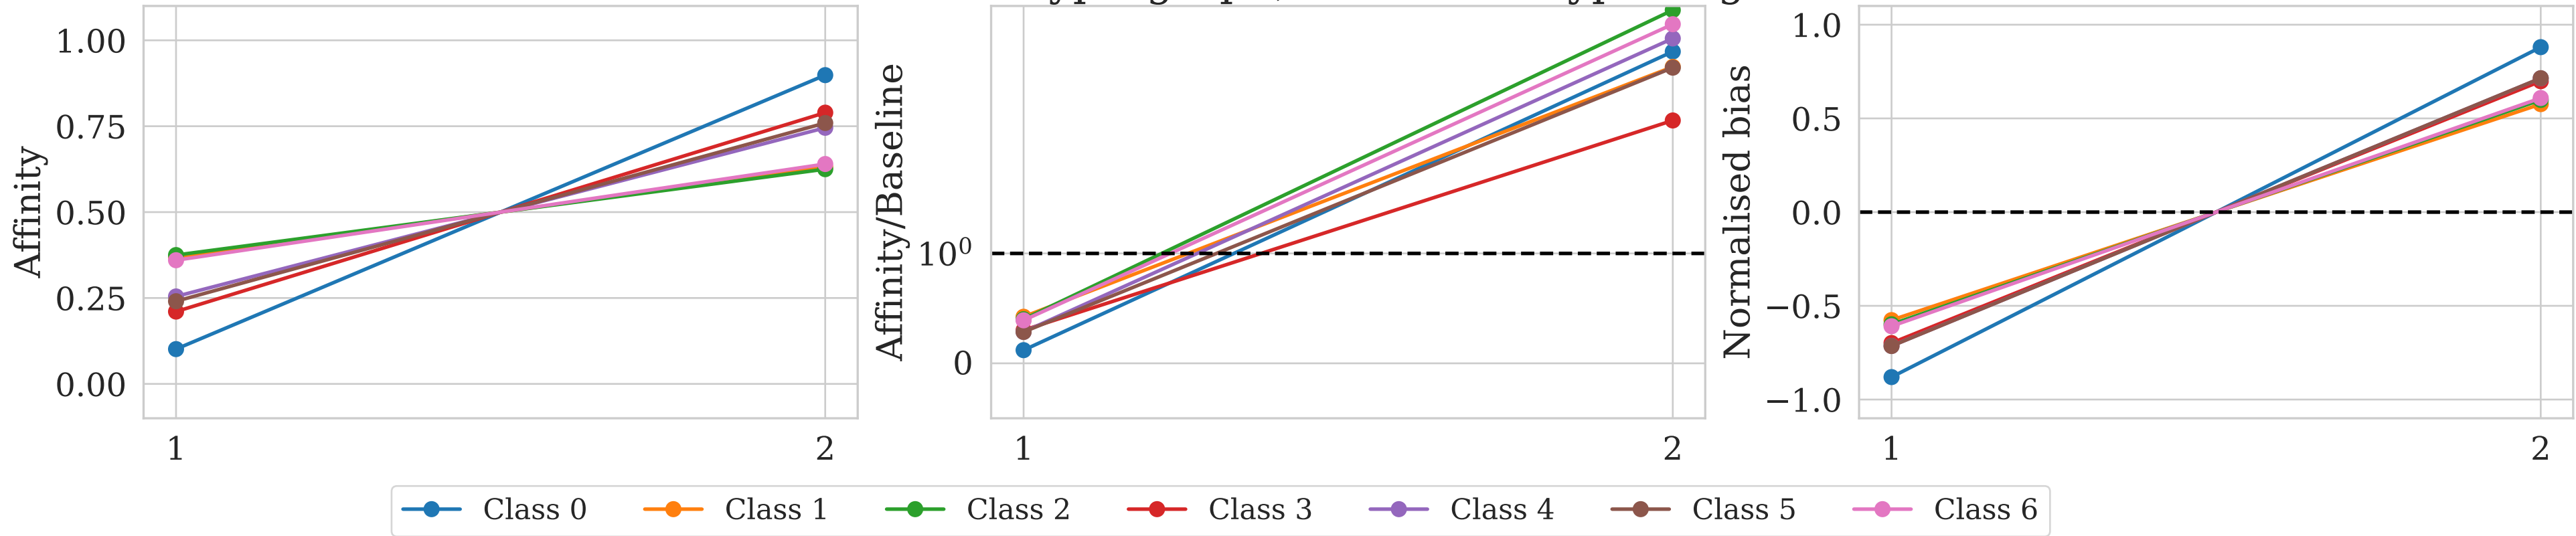

3-uniform hypergraph, number of hyperedges: 464

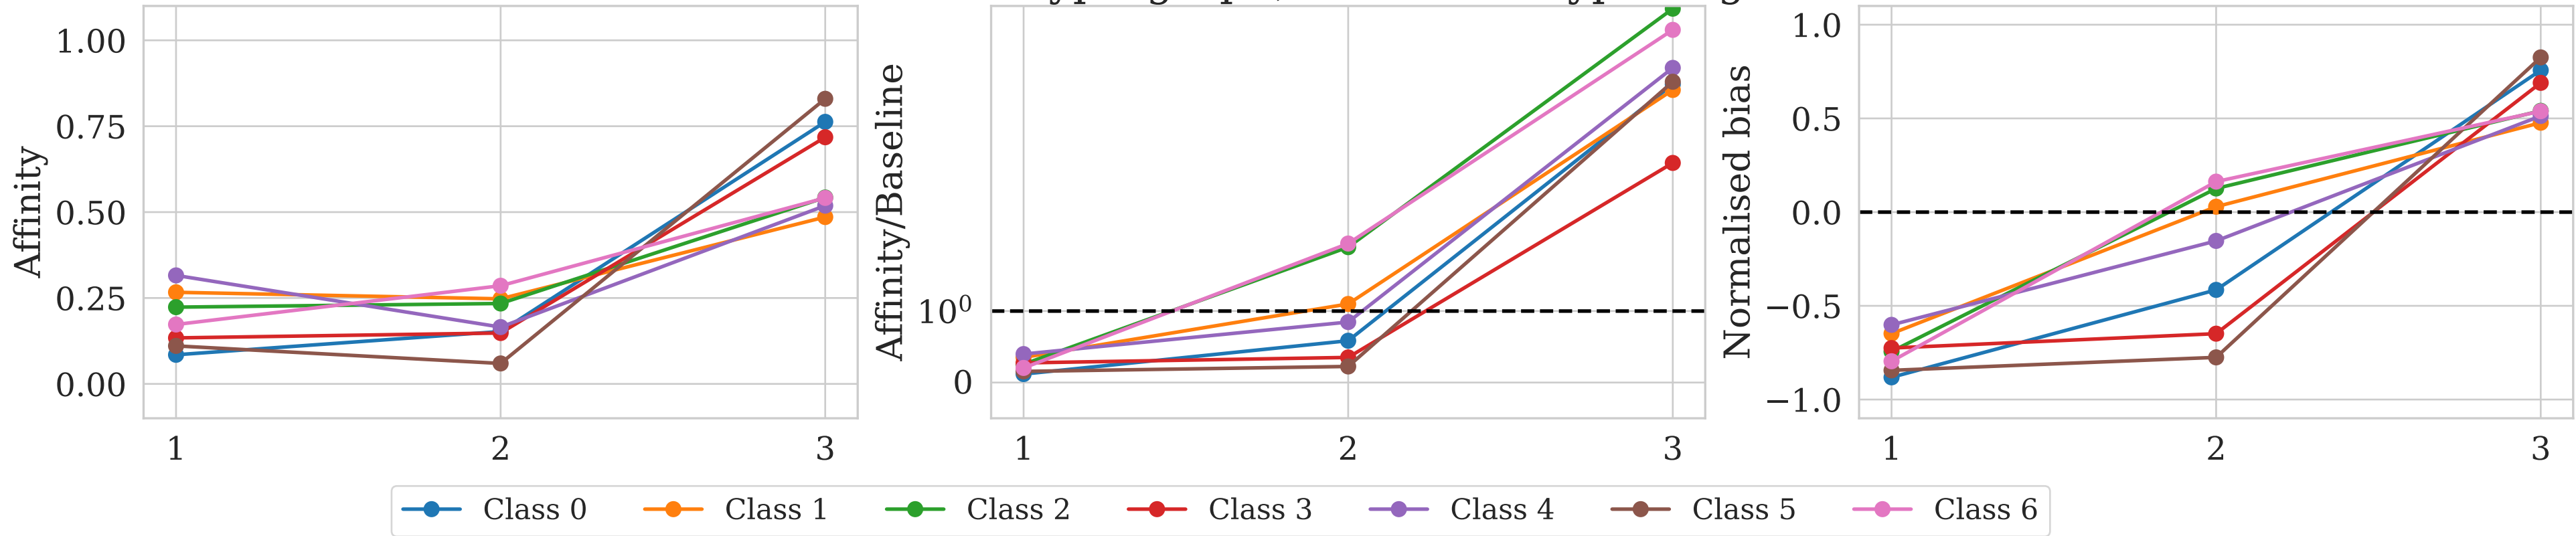

4-uniform hypergraph, number of hyperedges: 312

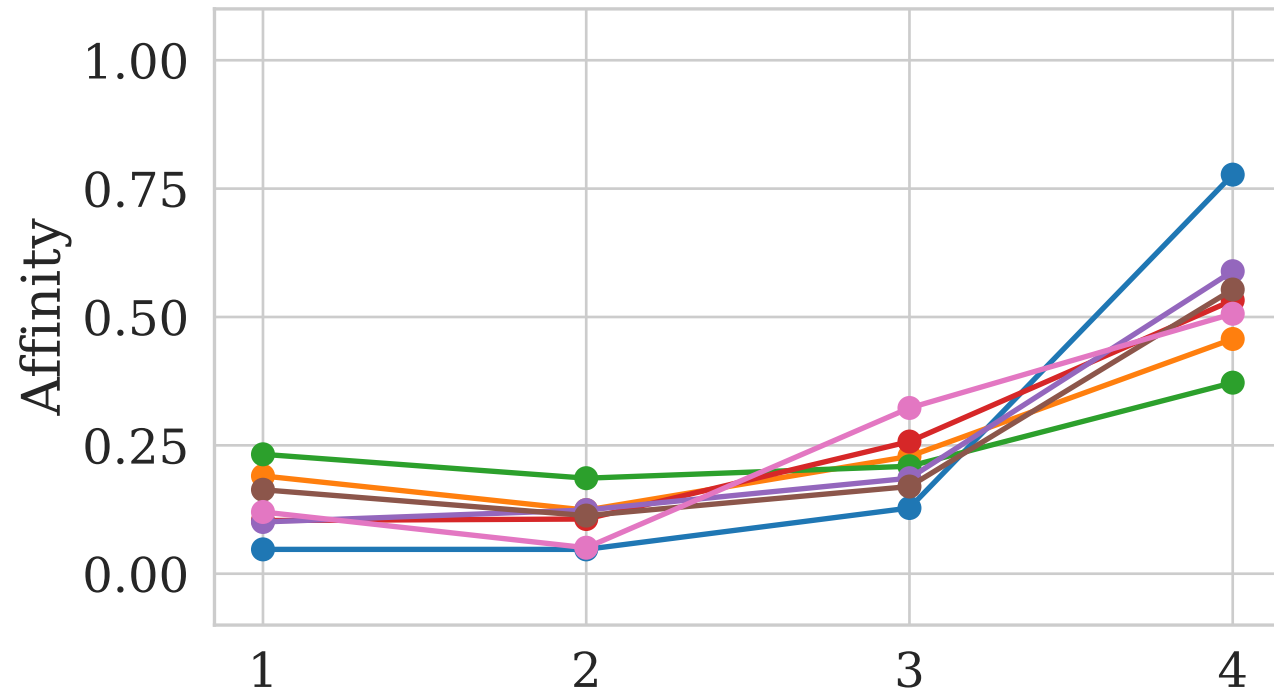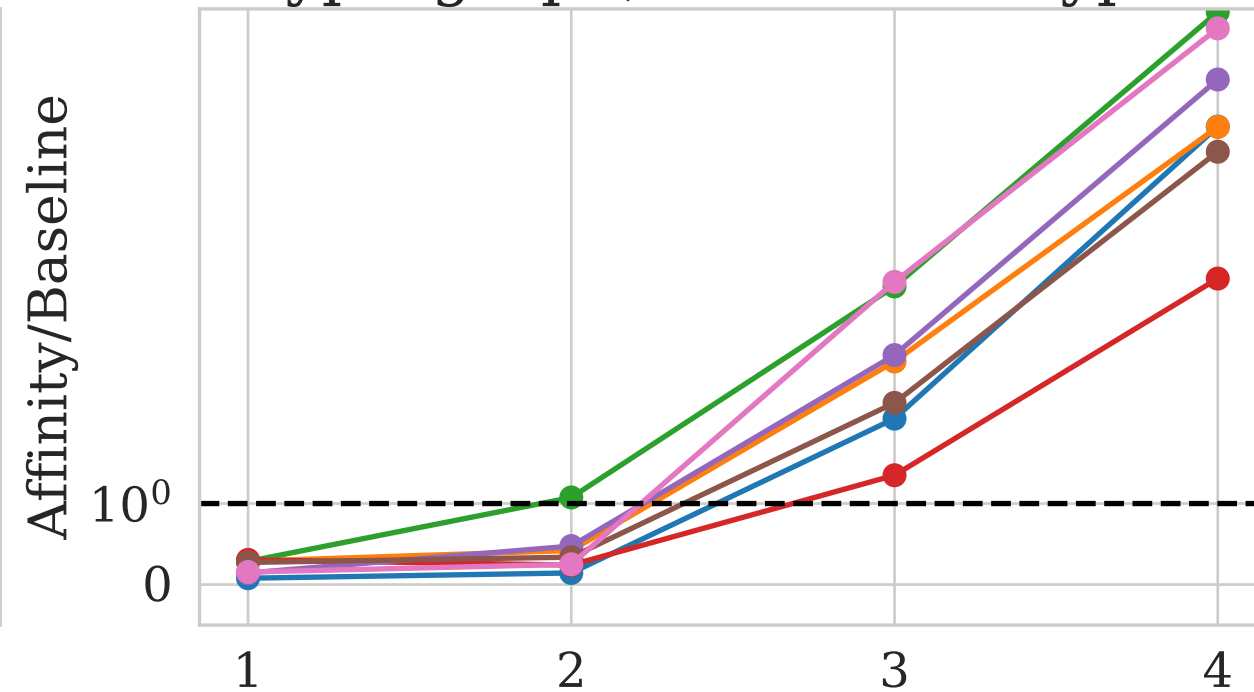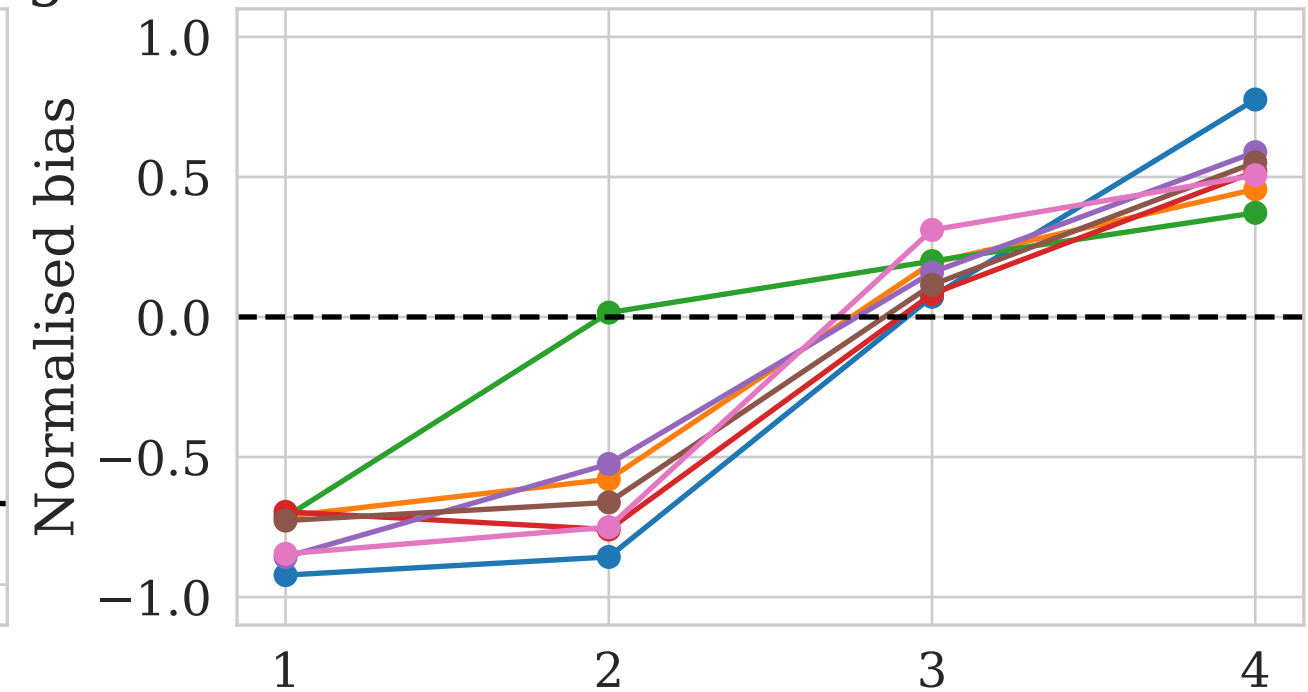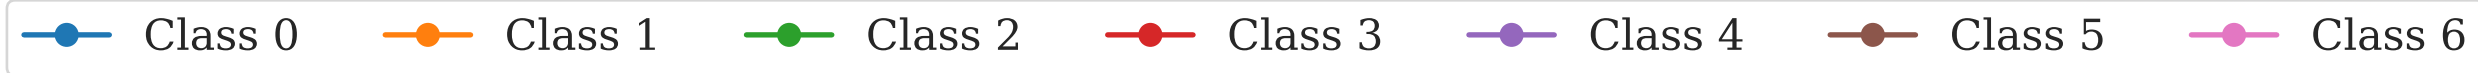

5-uniform hypergraph, number of hyperedges: 180

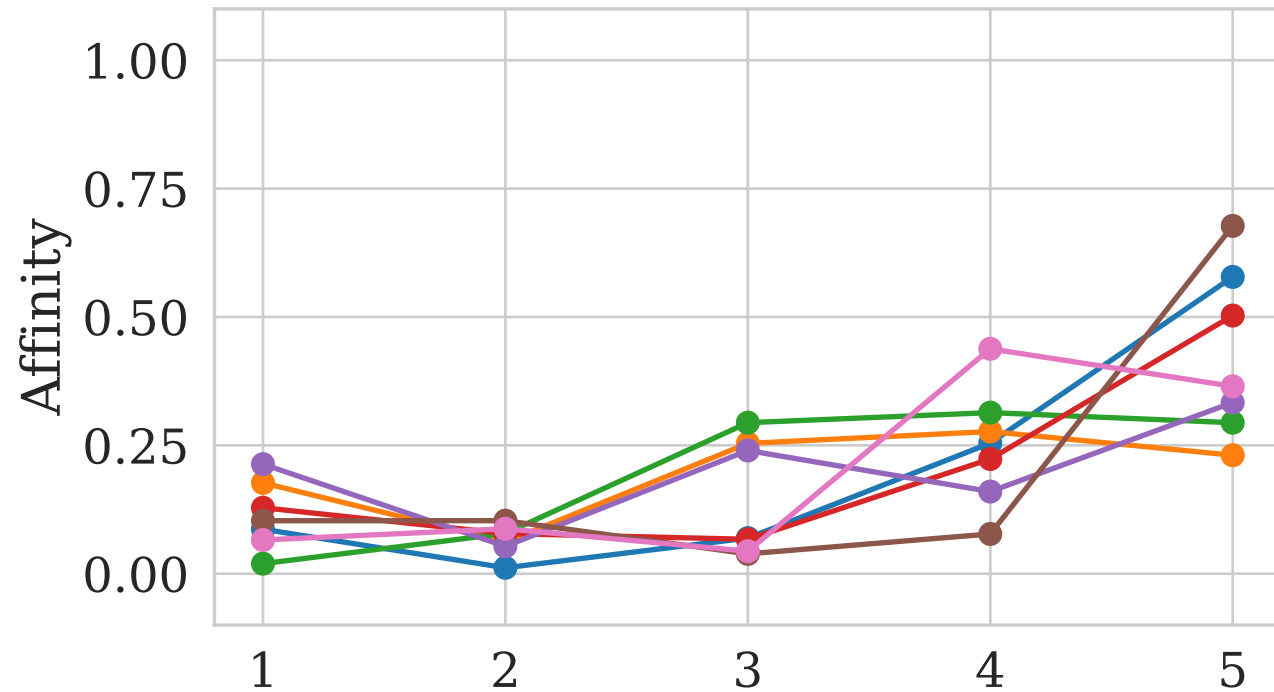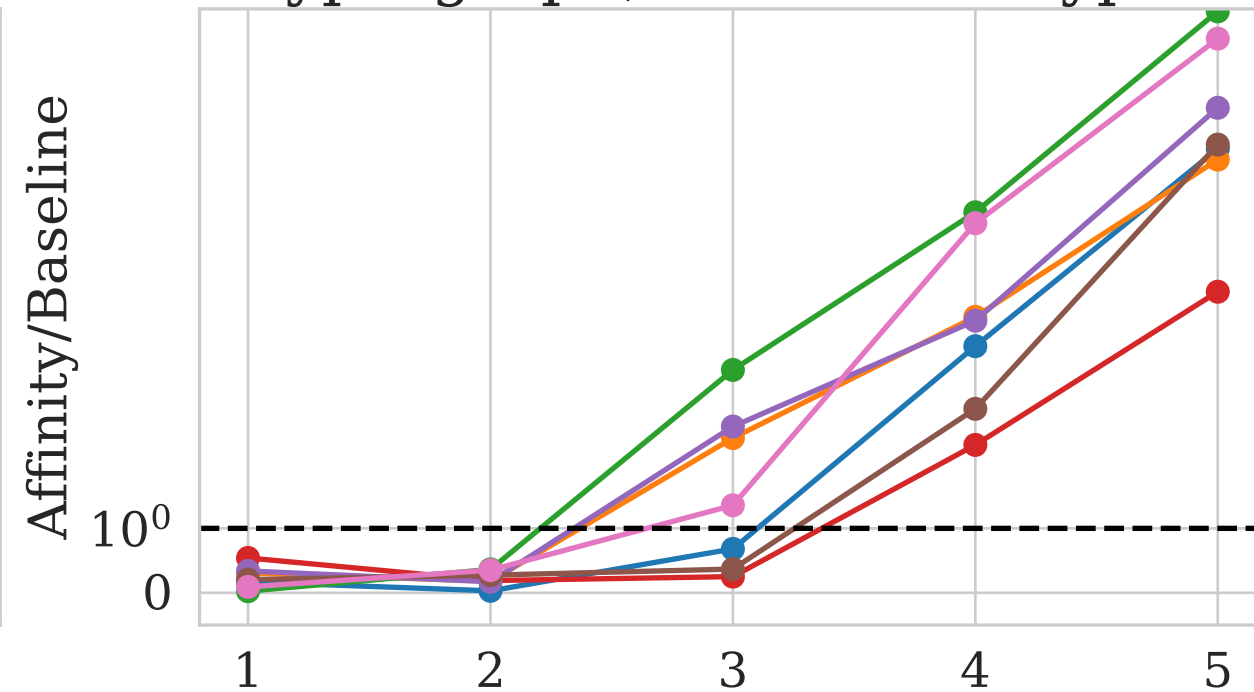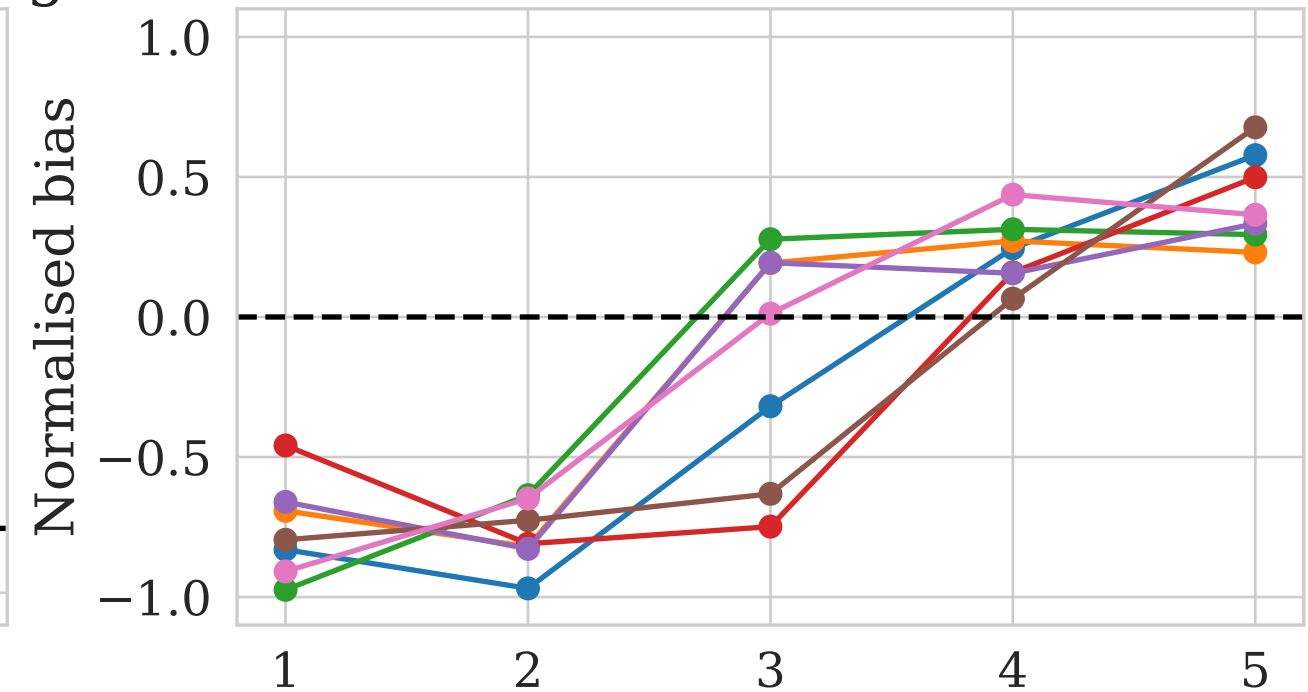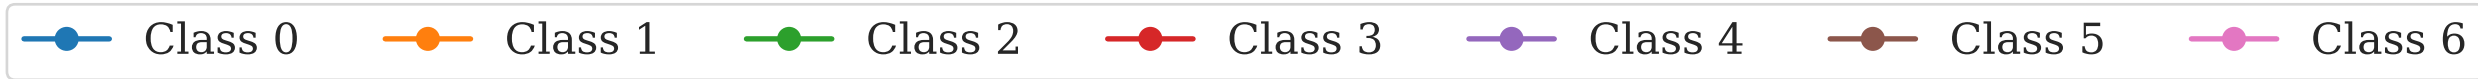

Supplement: supplementary_material [file attachment]
