# Supplementary material
Source: ML conference proceedings conference paper supplement (https://openreview.net/forum?id=YPpkFqMX6V)
Supplement: supplementary_material [file attachment]

2-uniform hypergraph, number of hyperedges: 3522

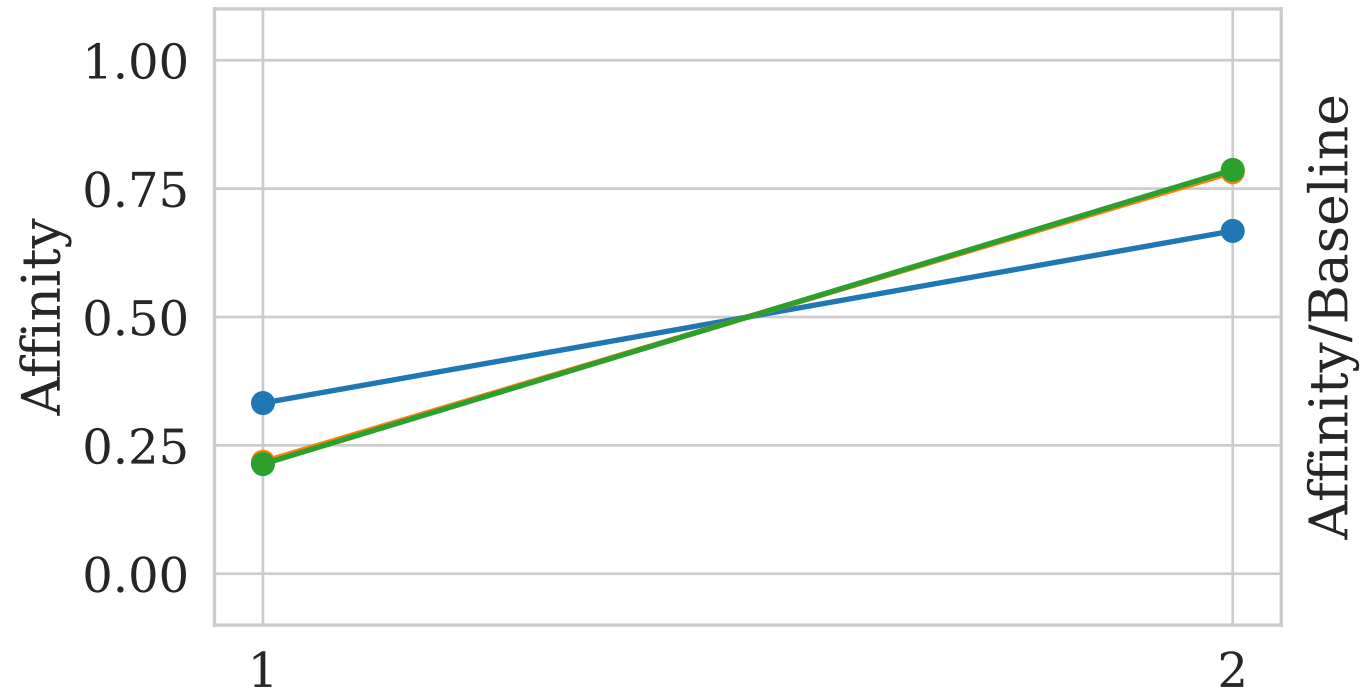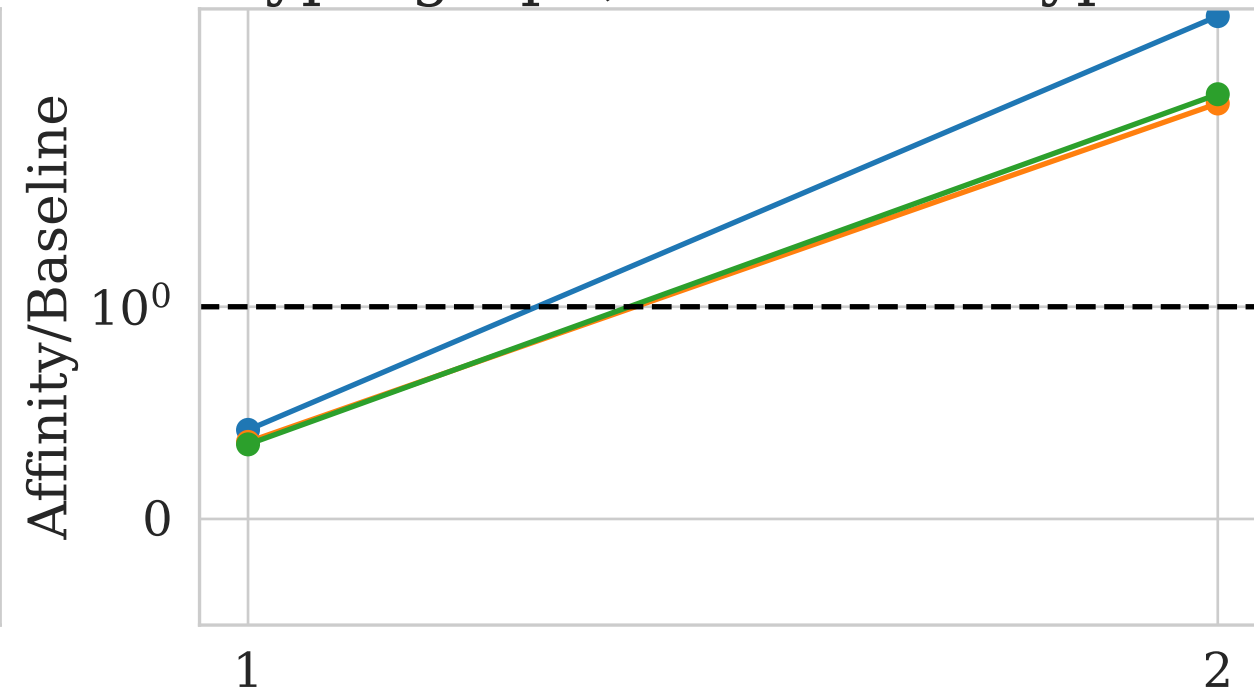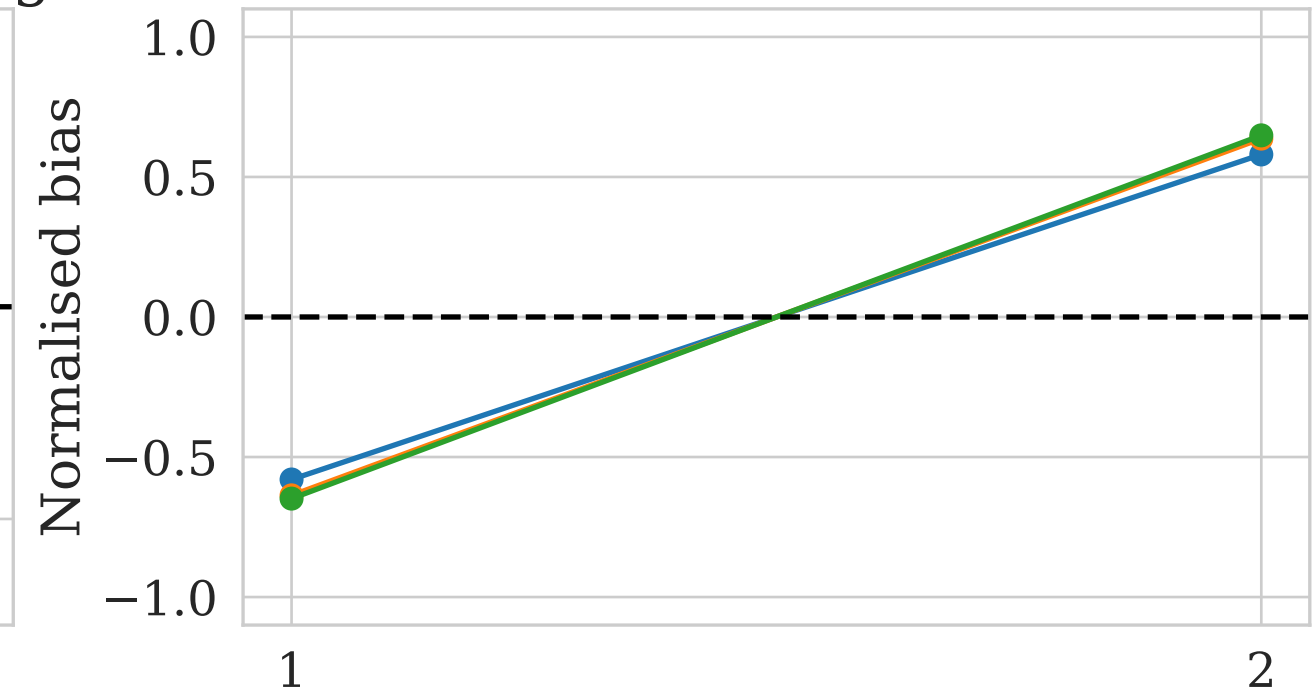

Class 0    Class 1    Class 2

3-uniform hypergraph, number of hyperedges: 1626

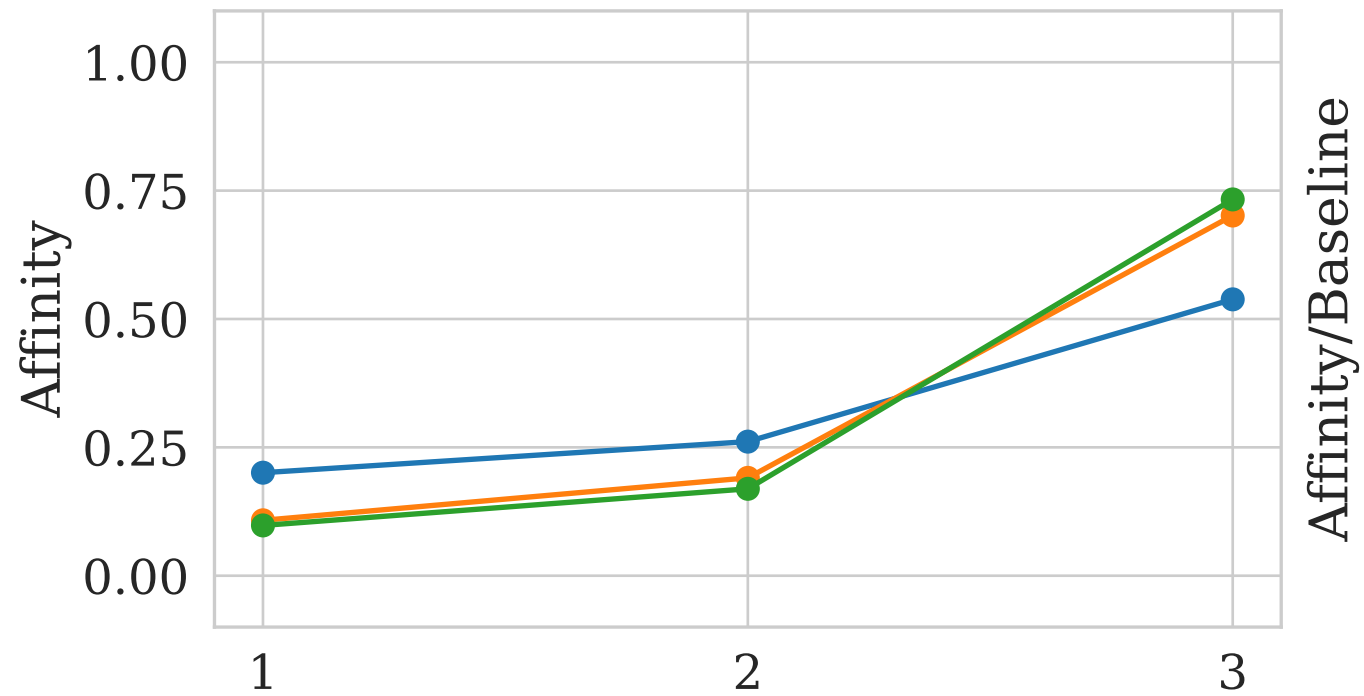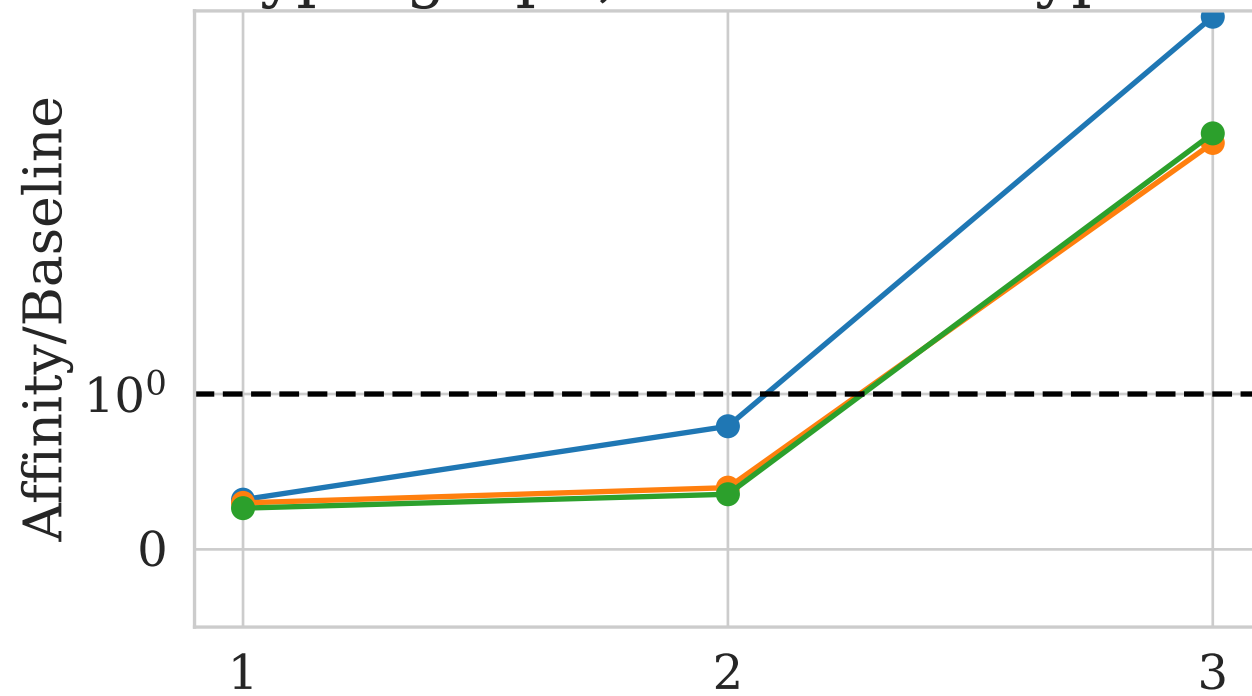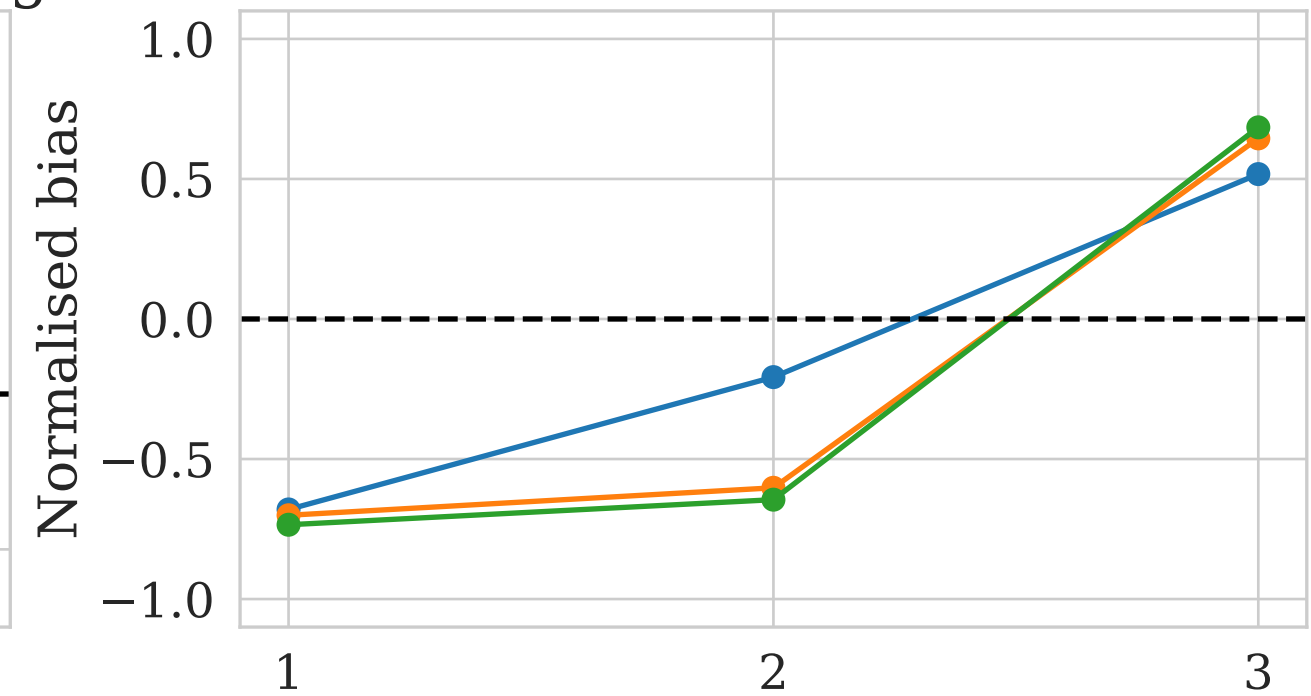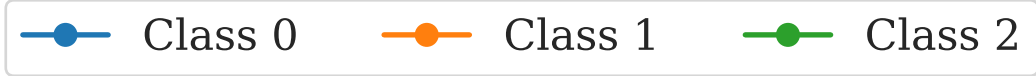

4-uniform hypergraph, number of hyperedges: 845

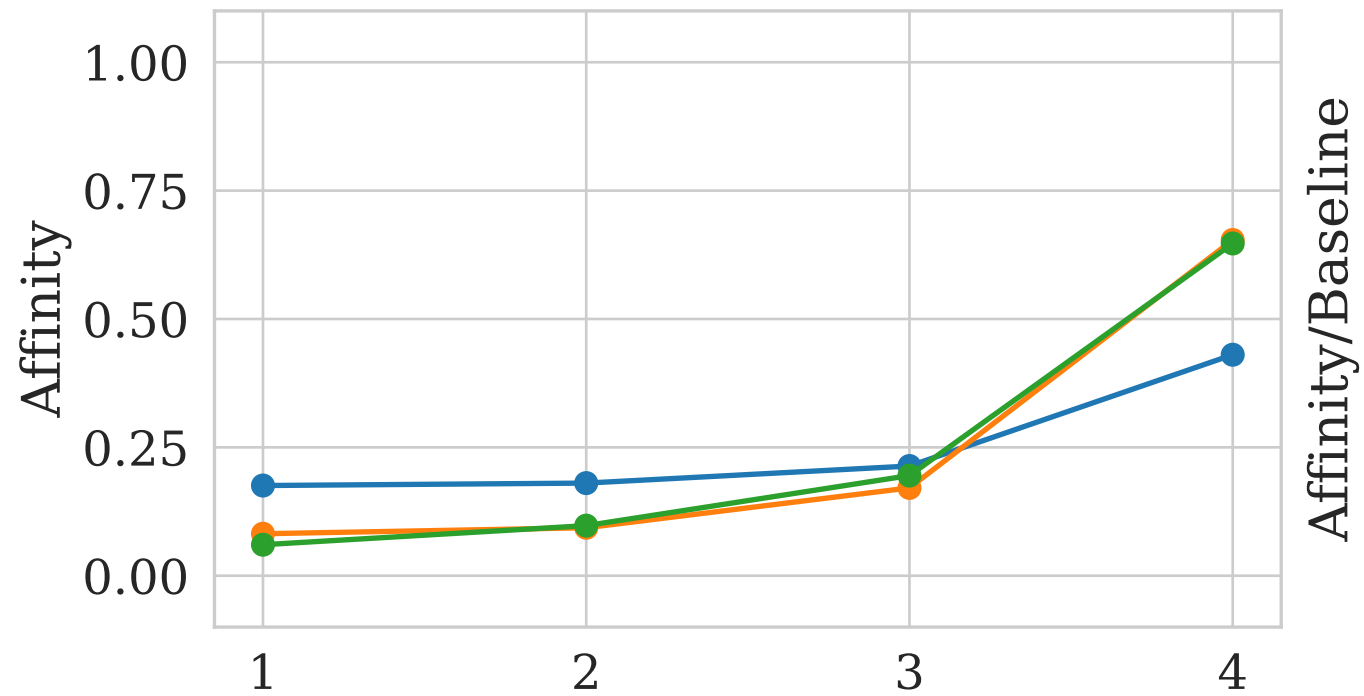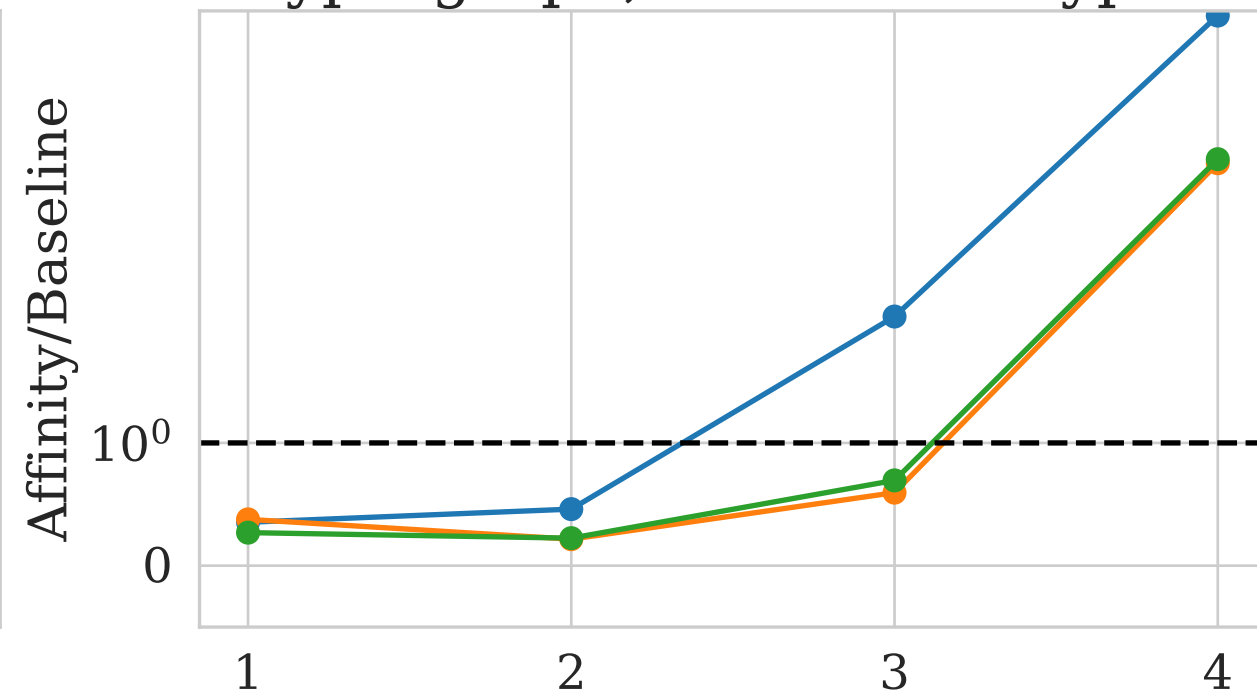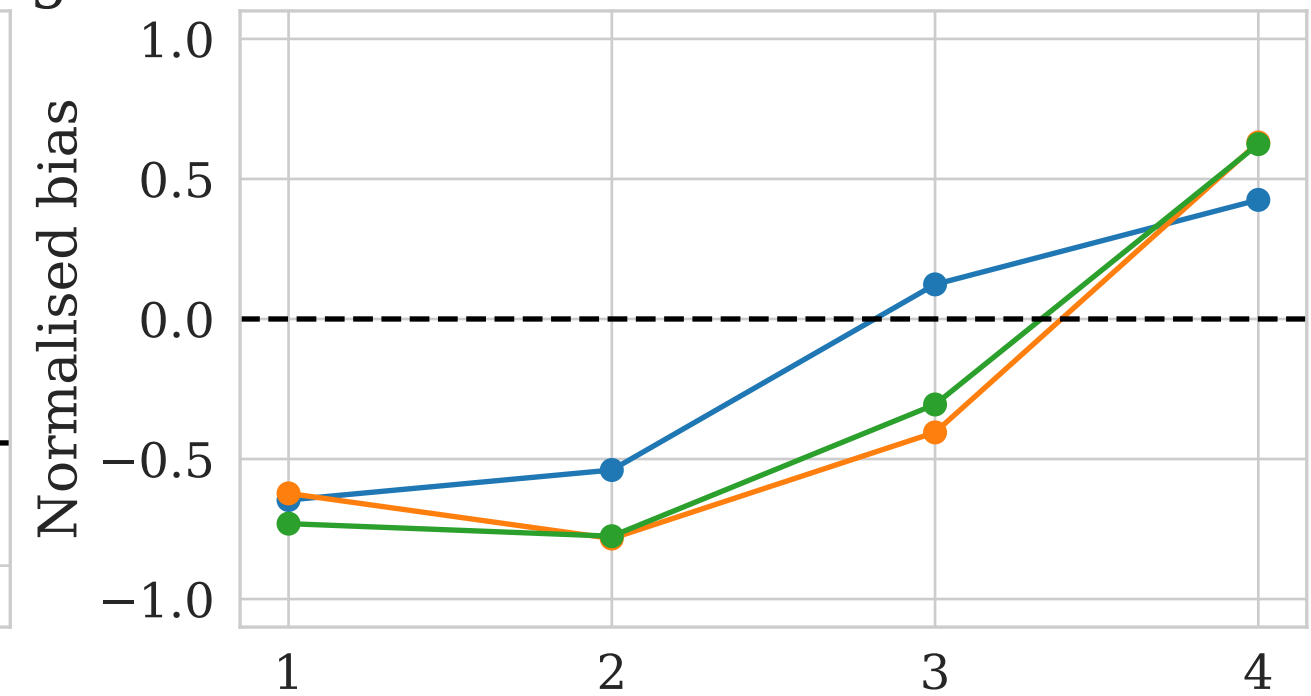

Class 0 Class 1 Class 2

5-uniform hypergraph, number of hyperedges: 534

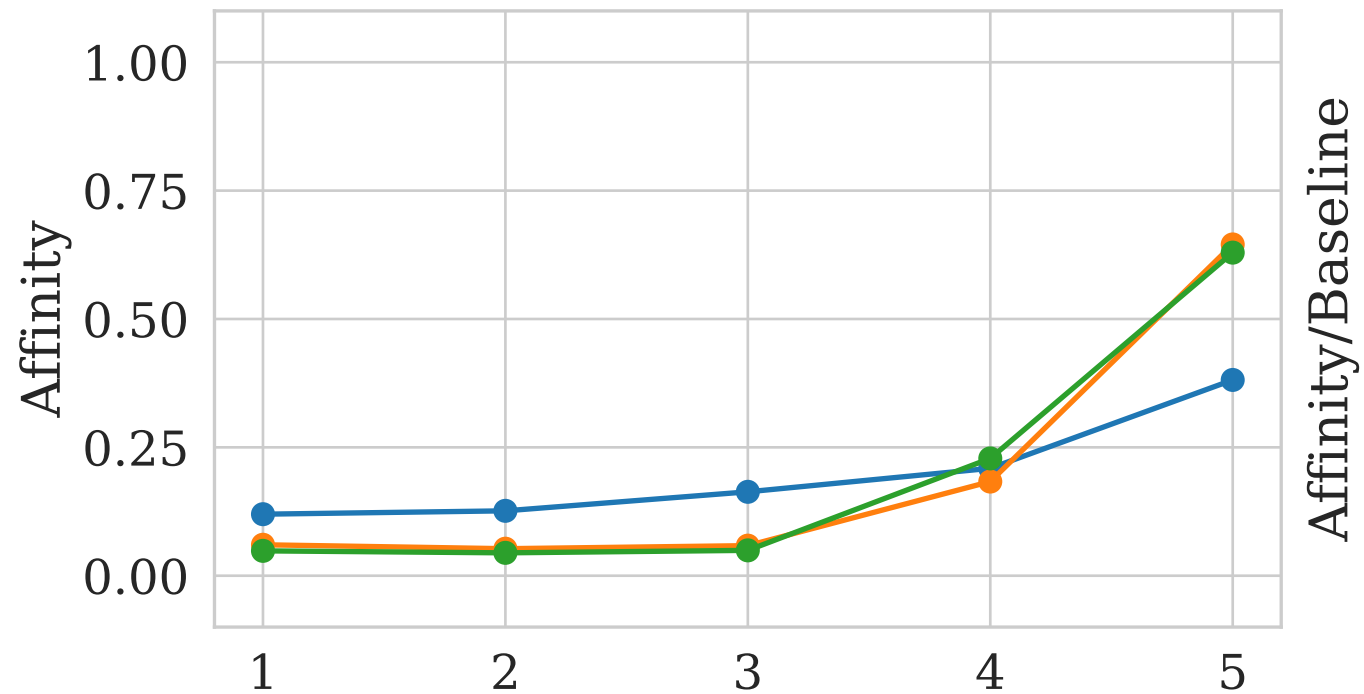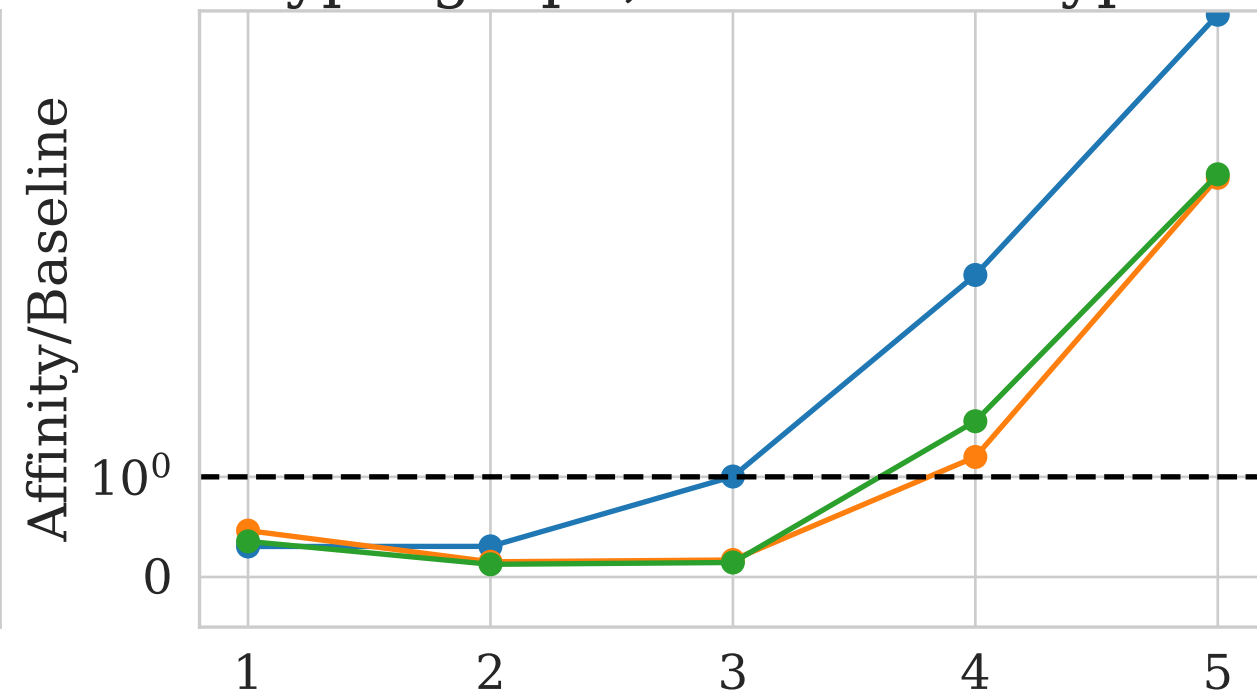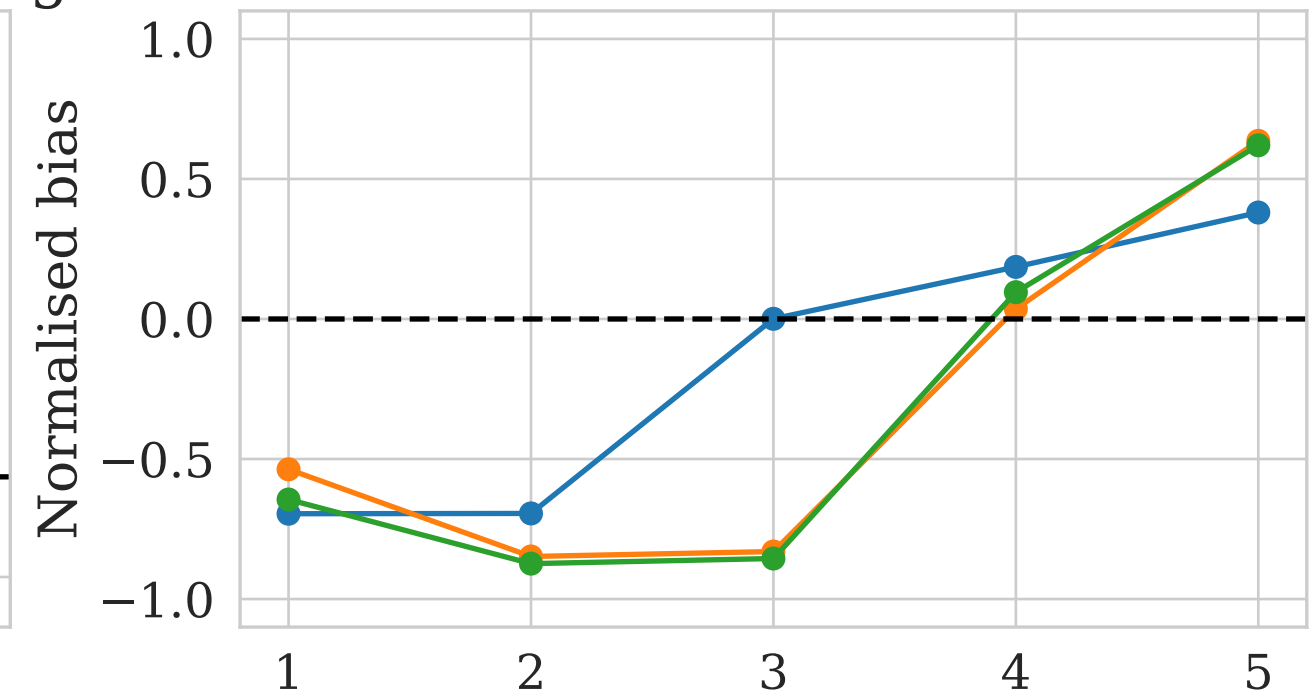

Class 0 Class 1 Class 2

6-uniform hypergraph, number of hyperedges: 297

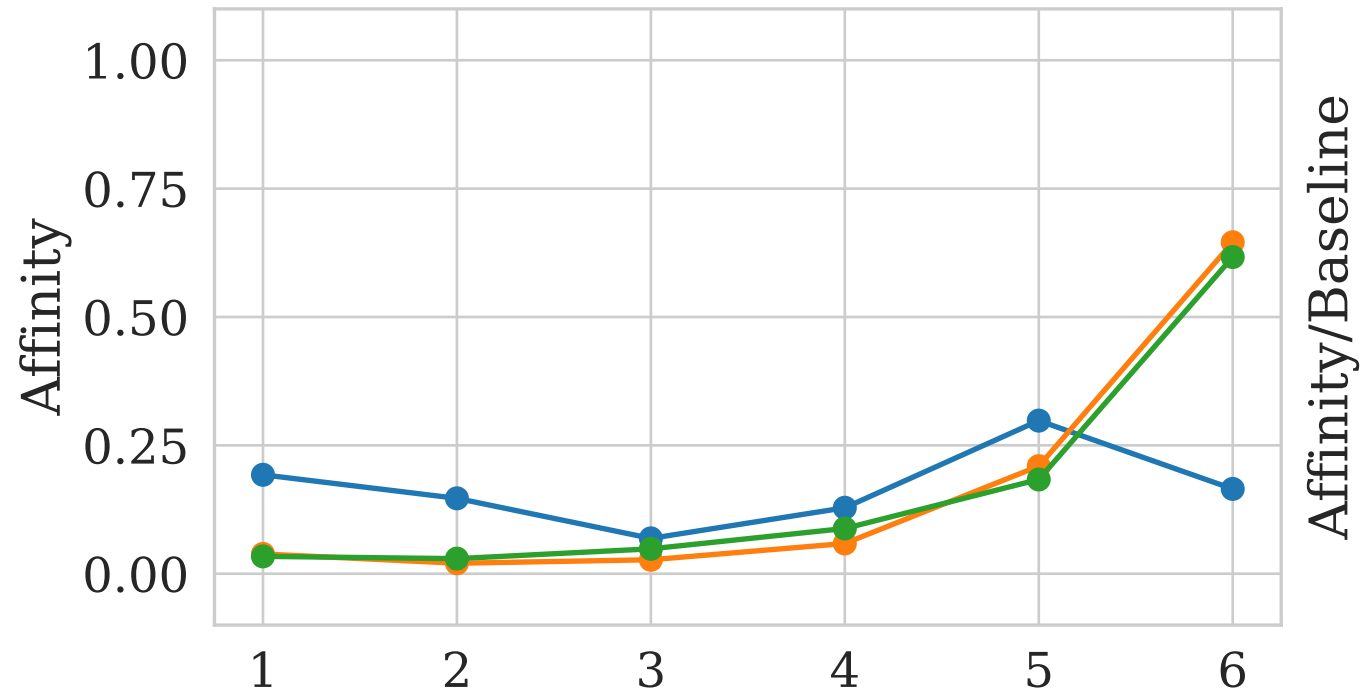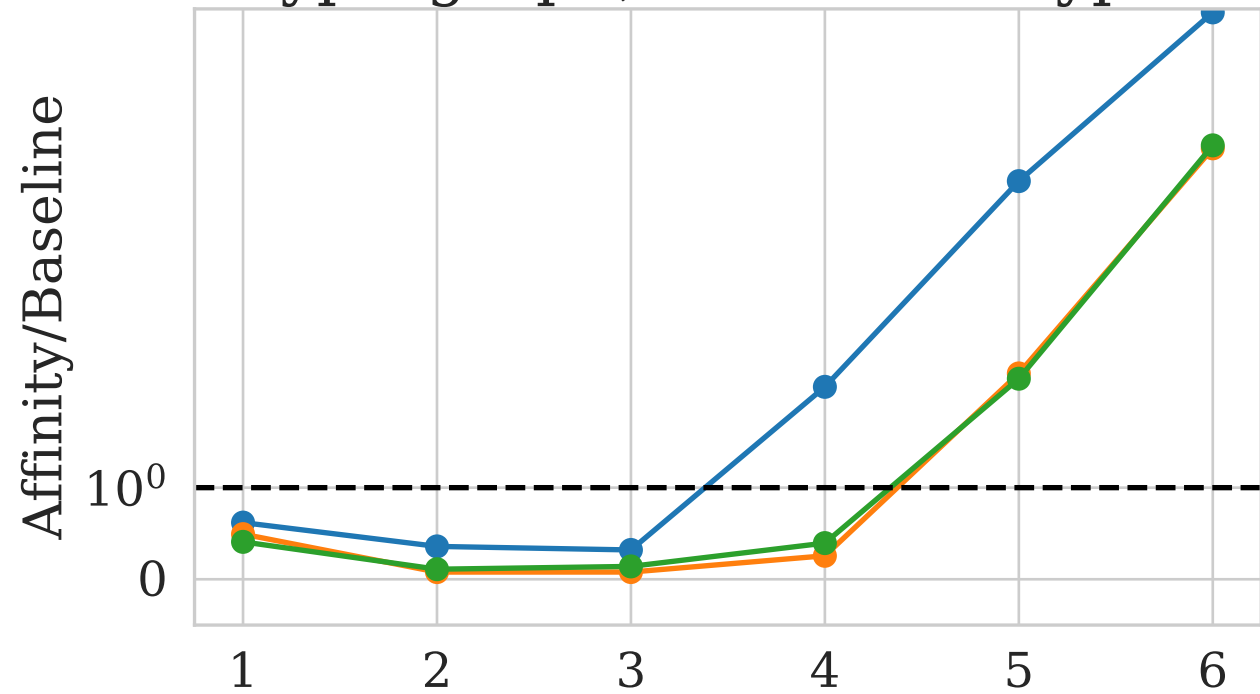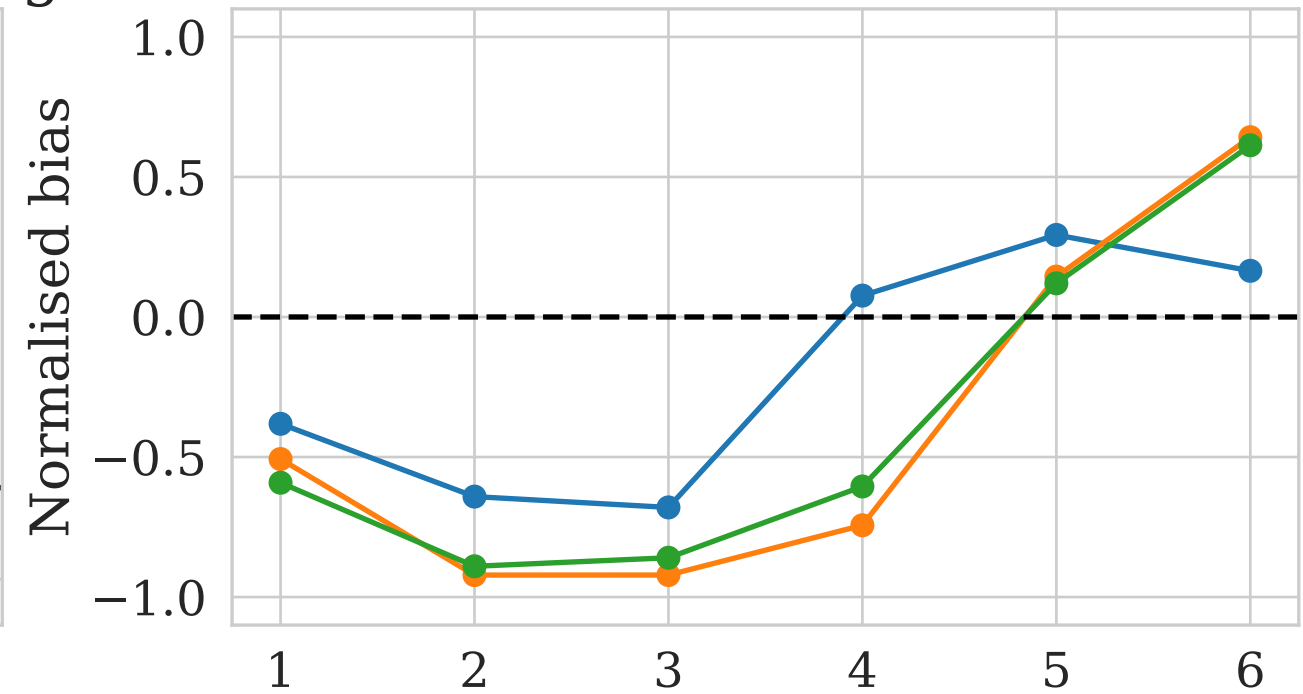

Class 0    Class 1    Class 2

7-uniform hypergraph, number of hyperedges: 247

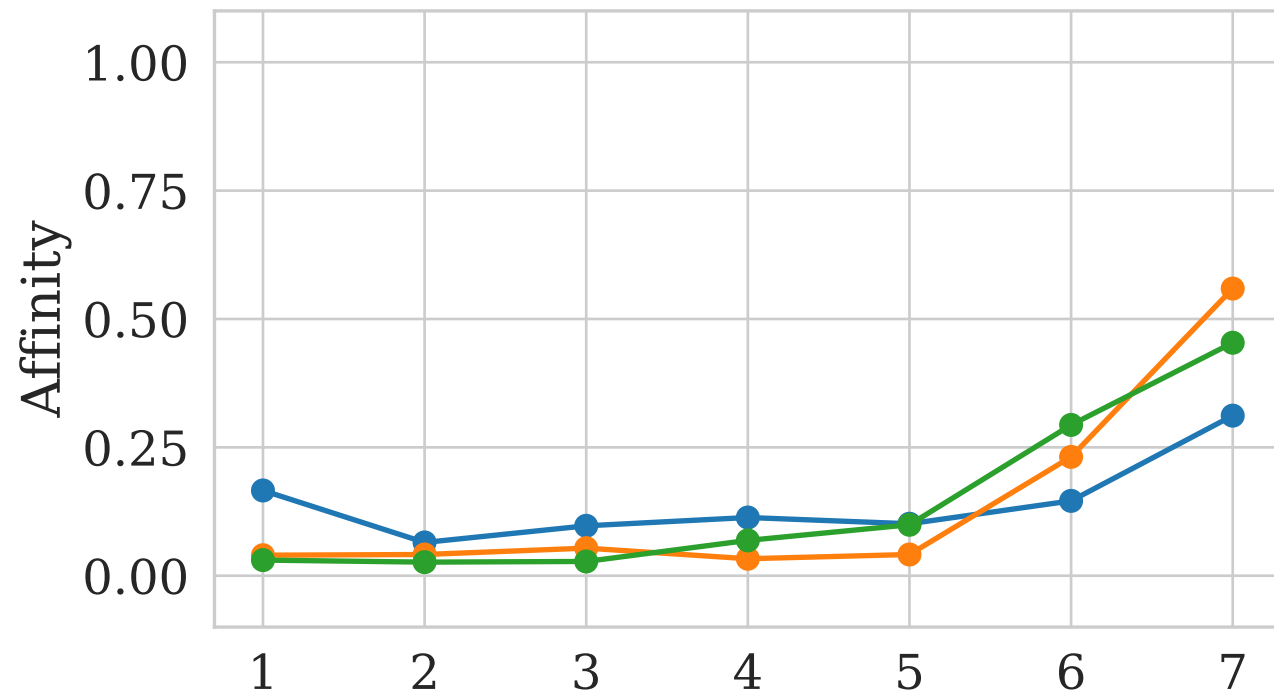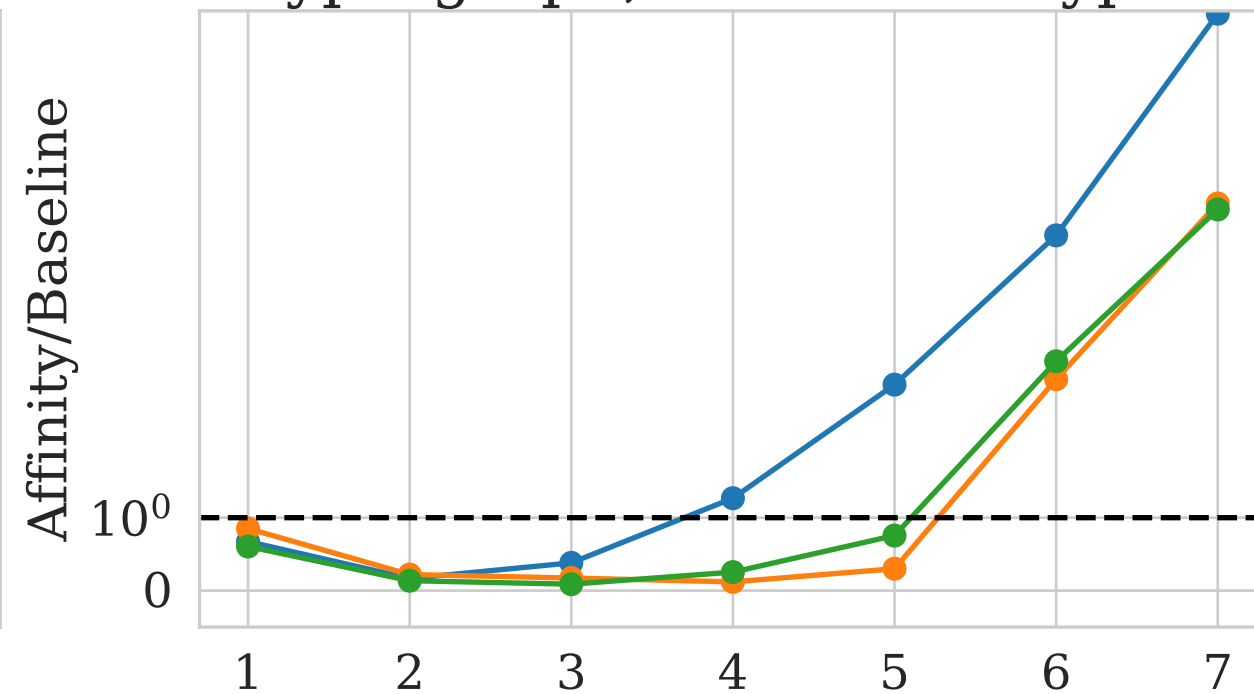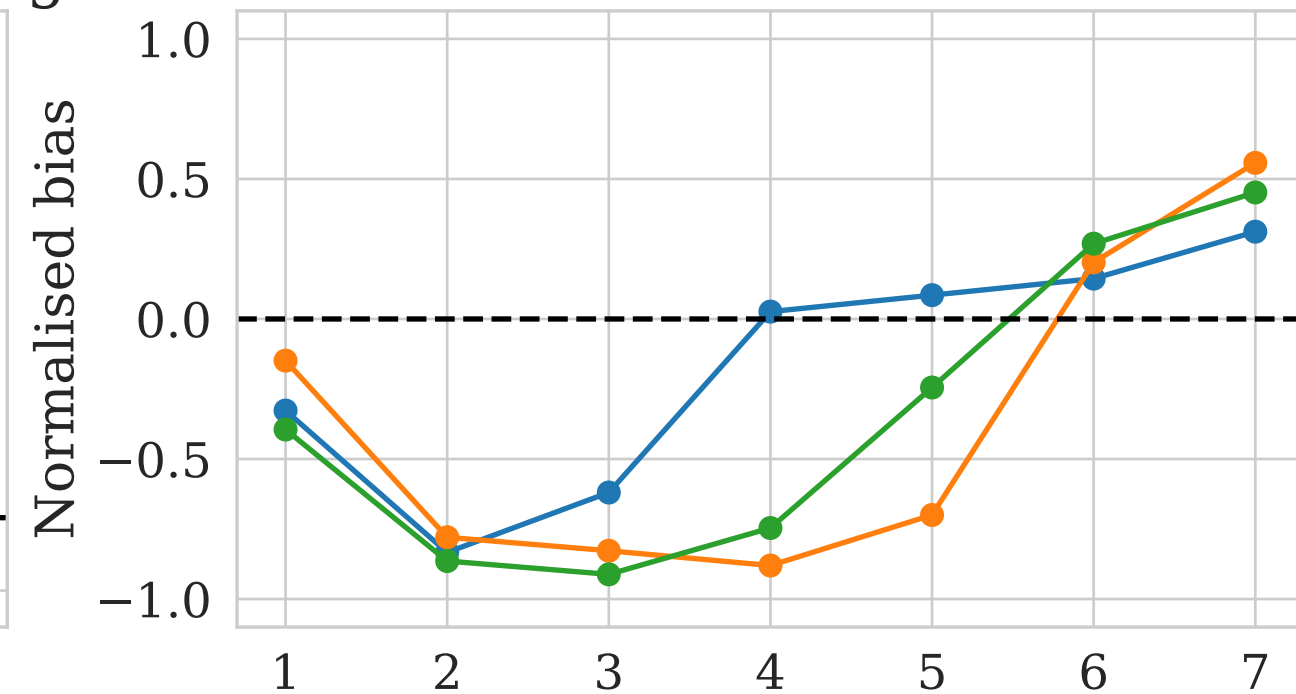

Class 0 Class 1 Class 2

8-uniform hypergraph, number of hyperedges: 161

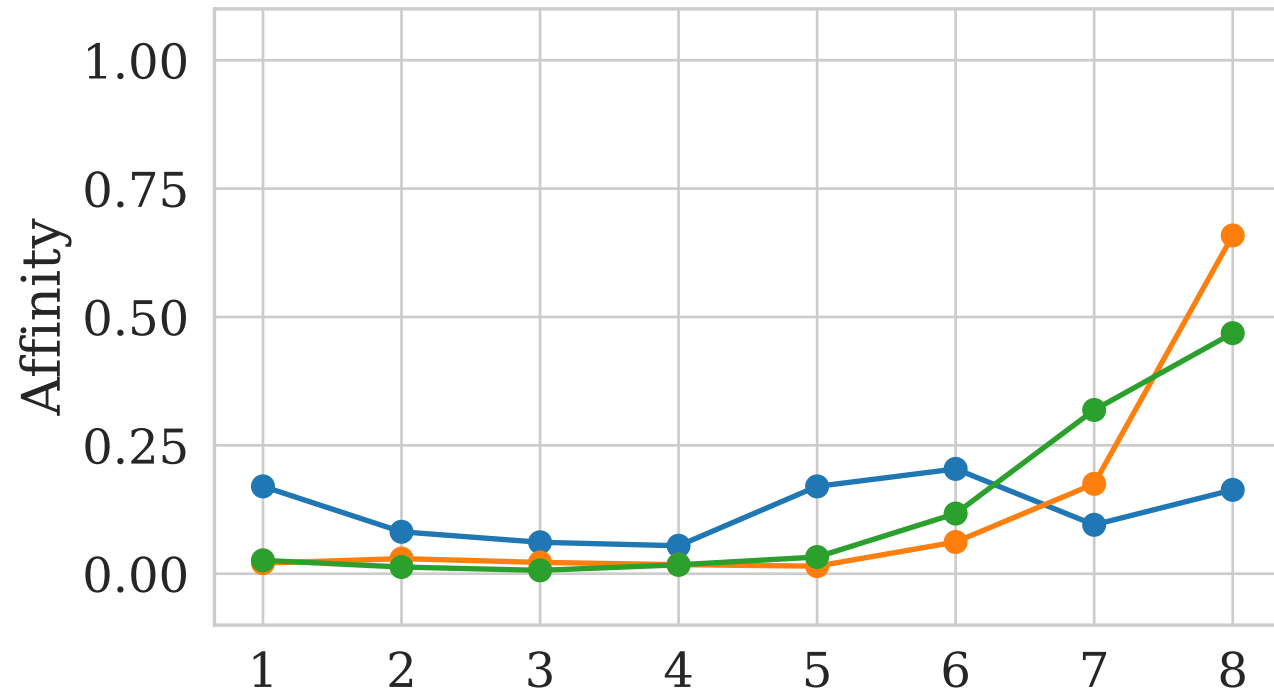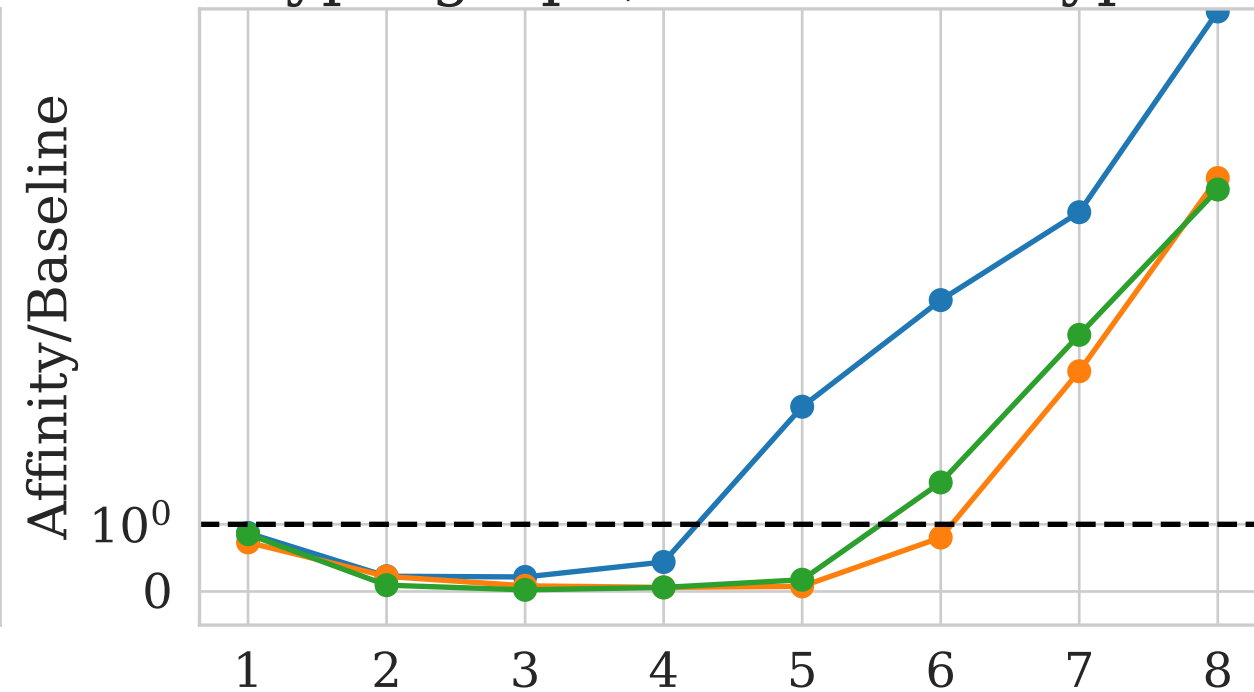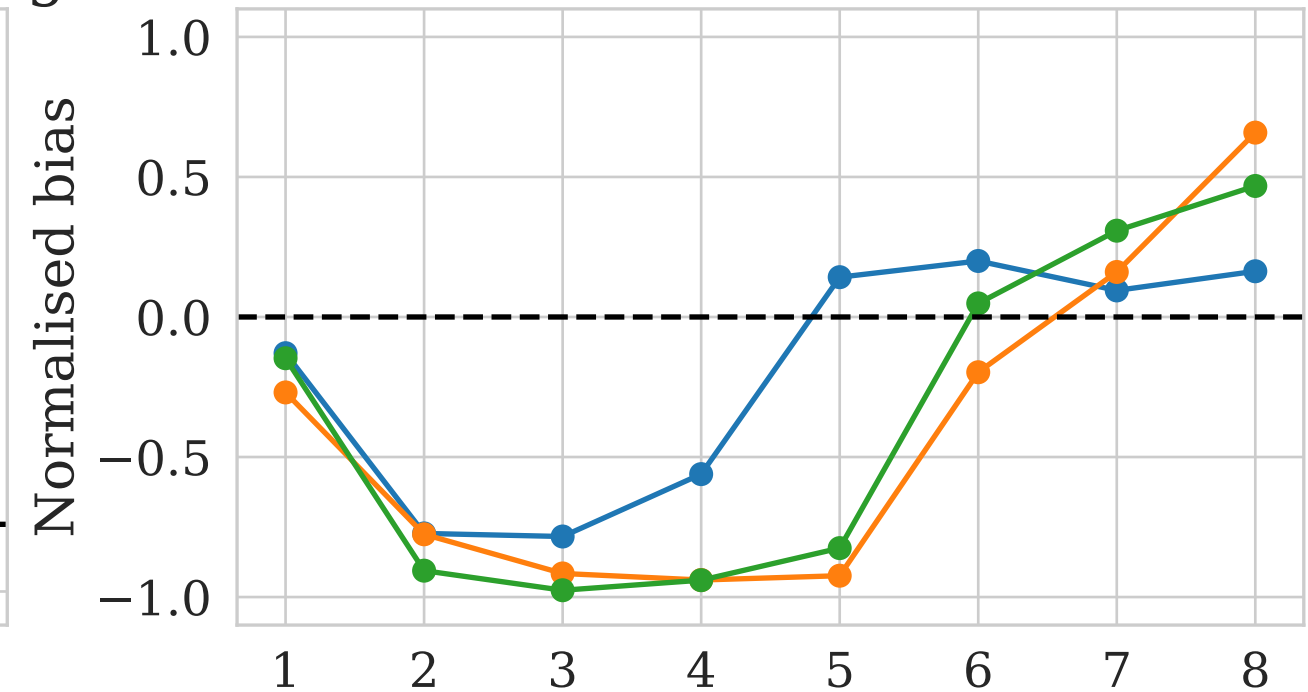

Class 0    Class 1    Class 2

9-uniform hypergraph, number of hyperedges: 124

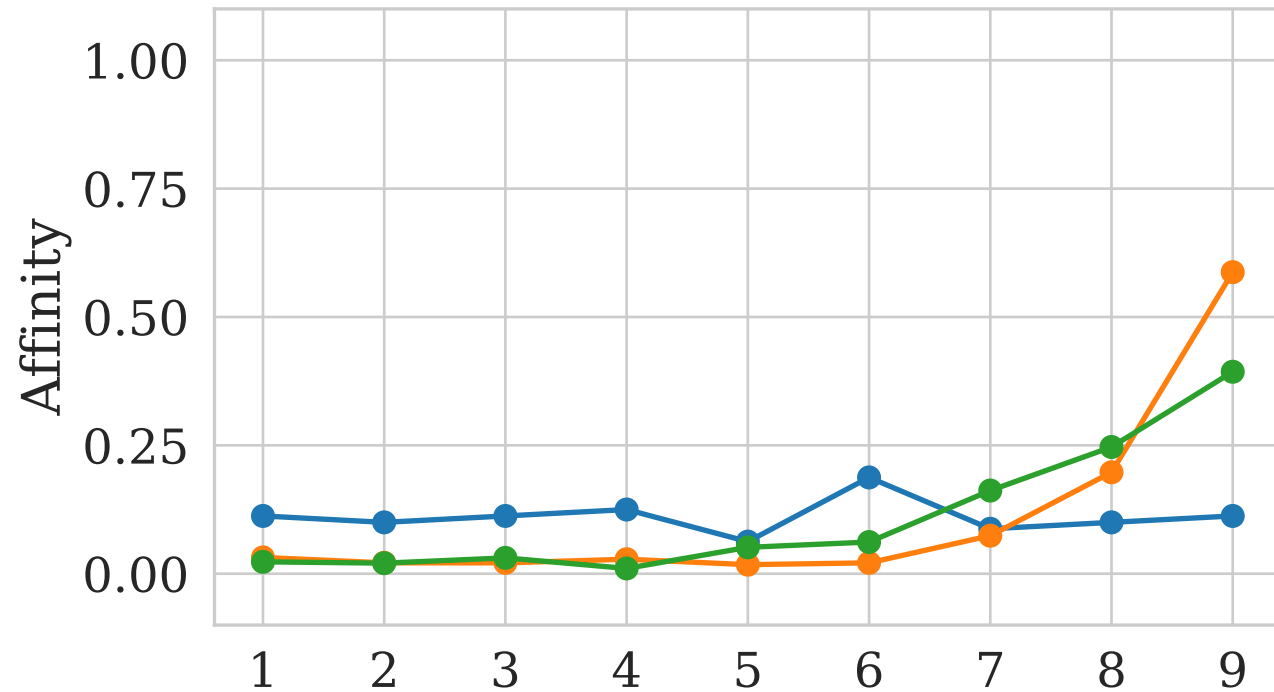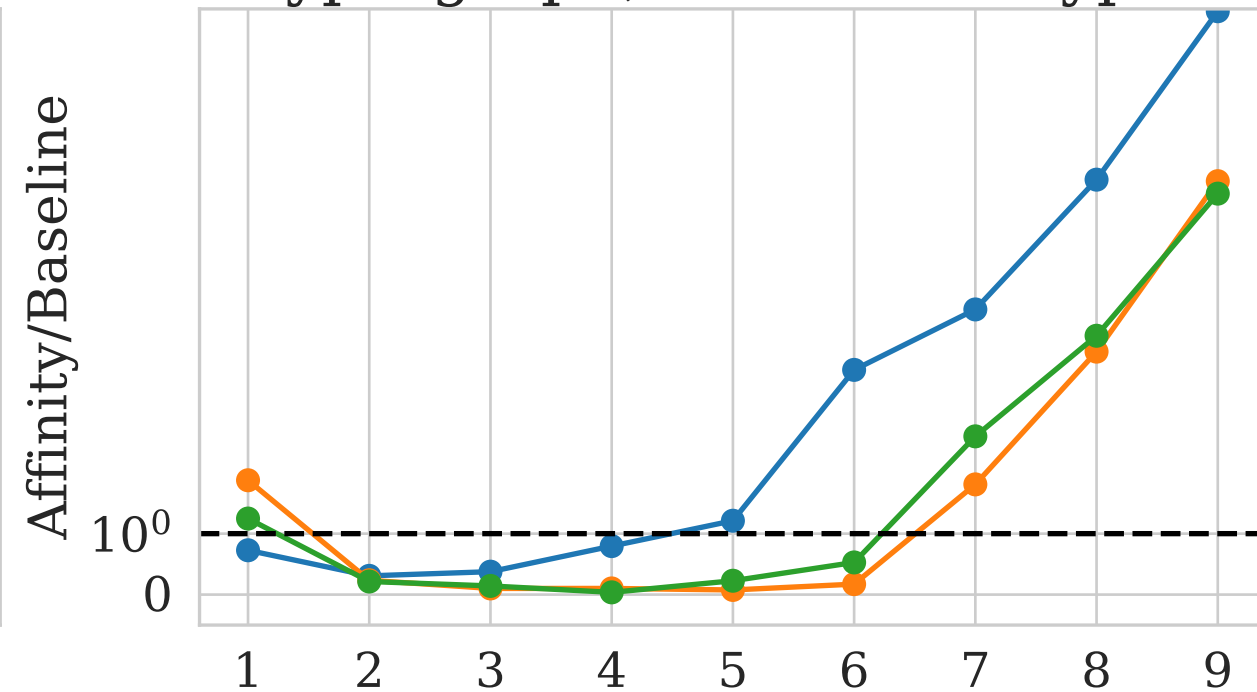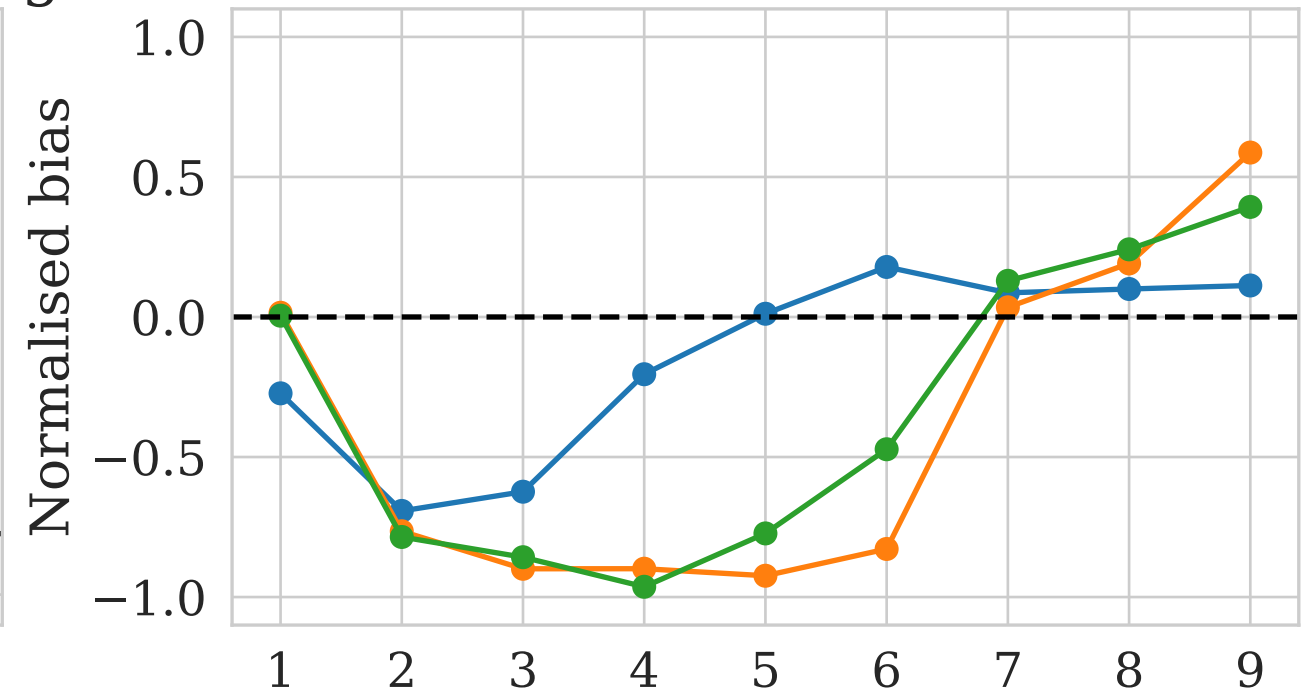

Class 0 Class 1 Class 2



10-uniform hypergraph, number of hyperedges: 110

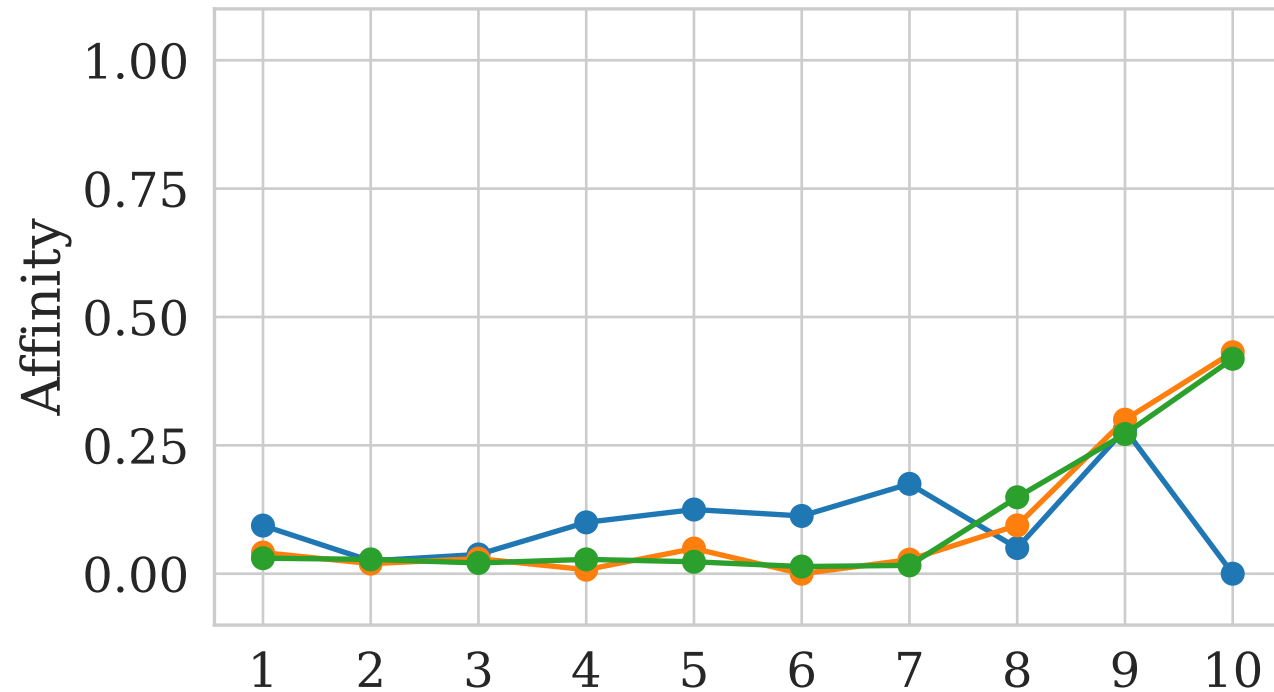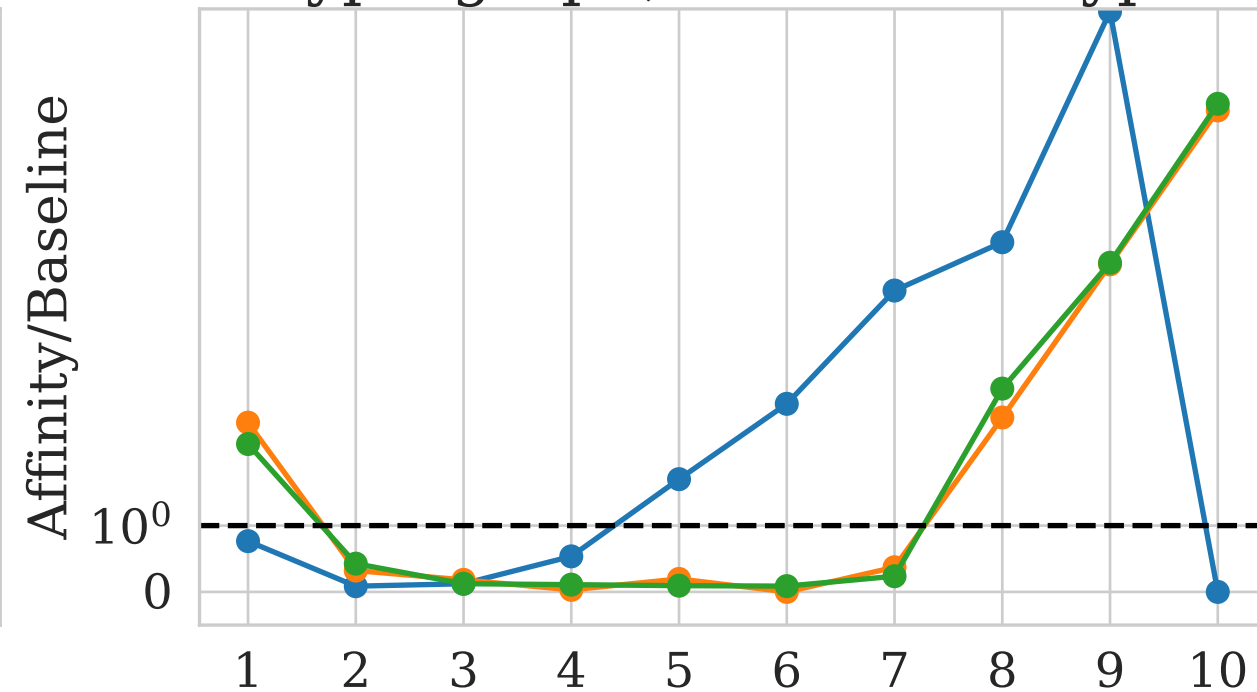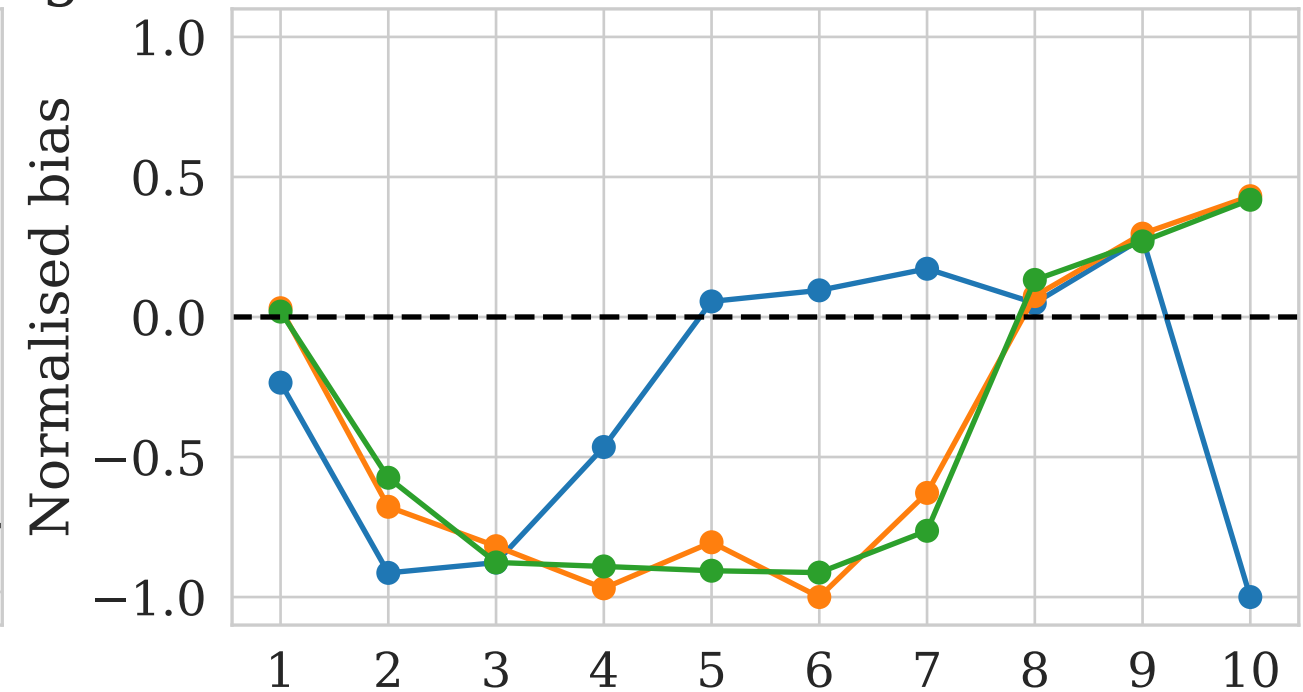

Class 0 Class 1 Class 2

11-uniform hypergraph, number of hyperedges: 79

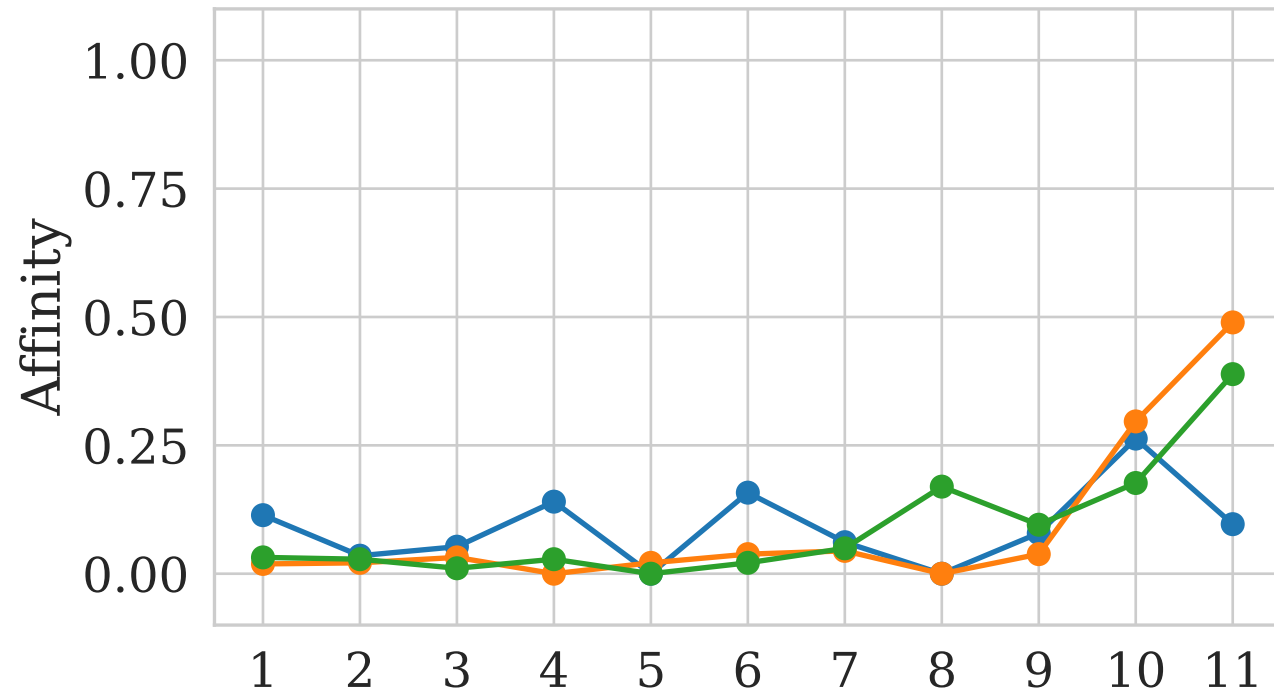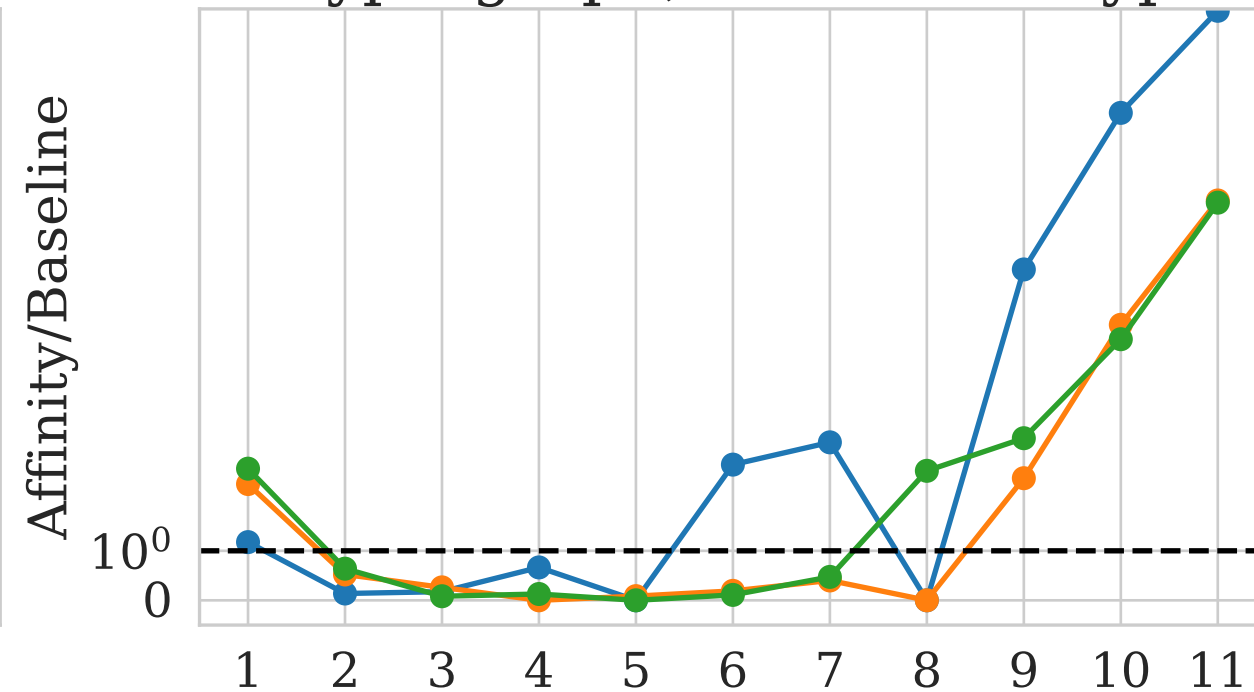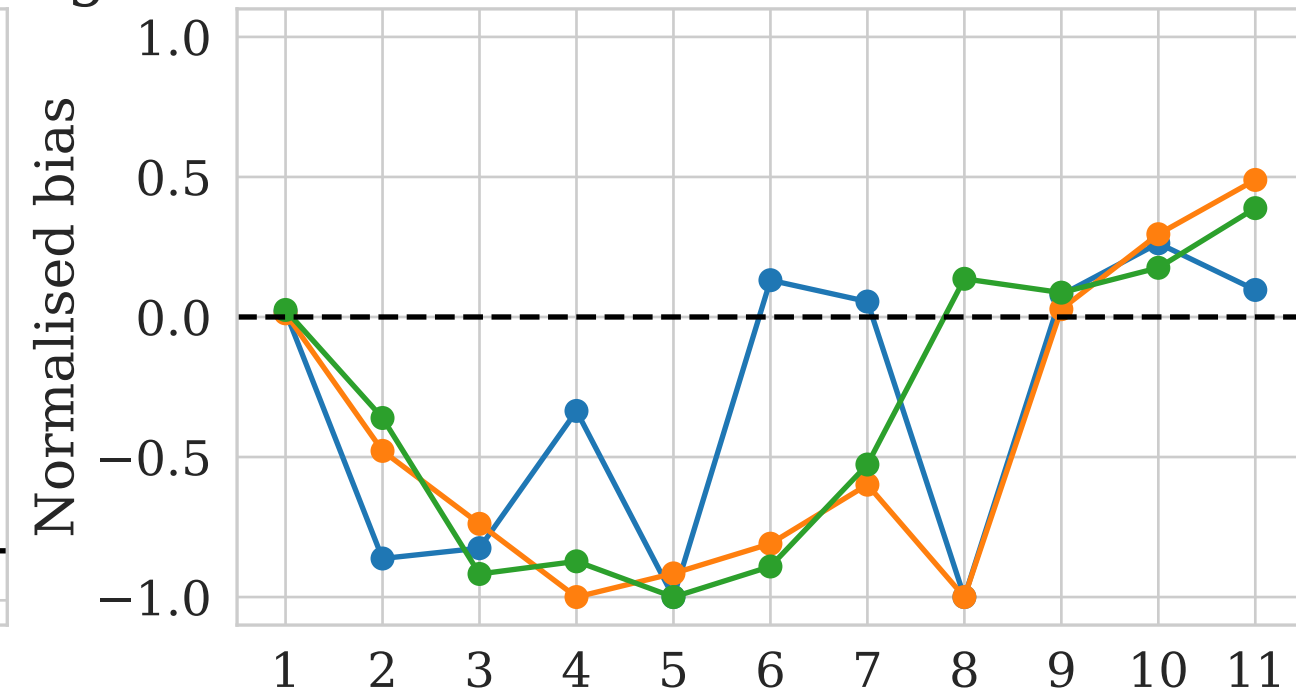

Class 0 Class 1 Class 2

13-uniform hypergraph, number of hyperedges: 61

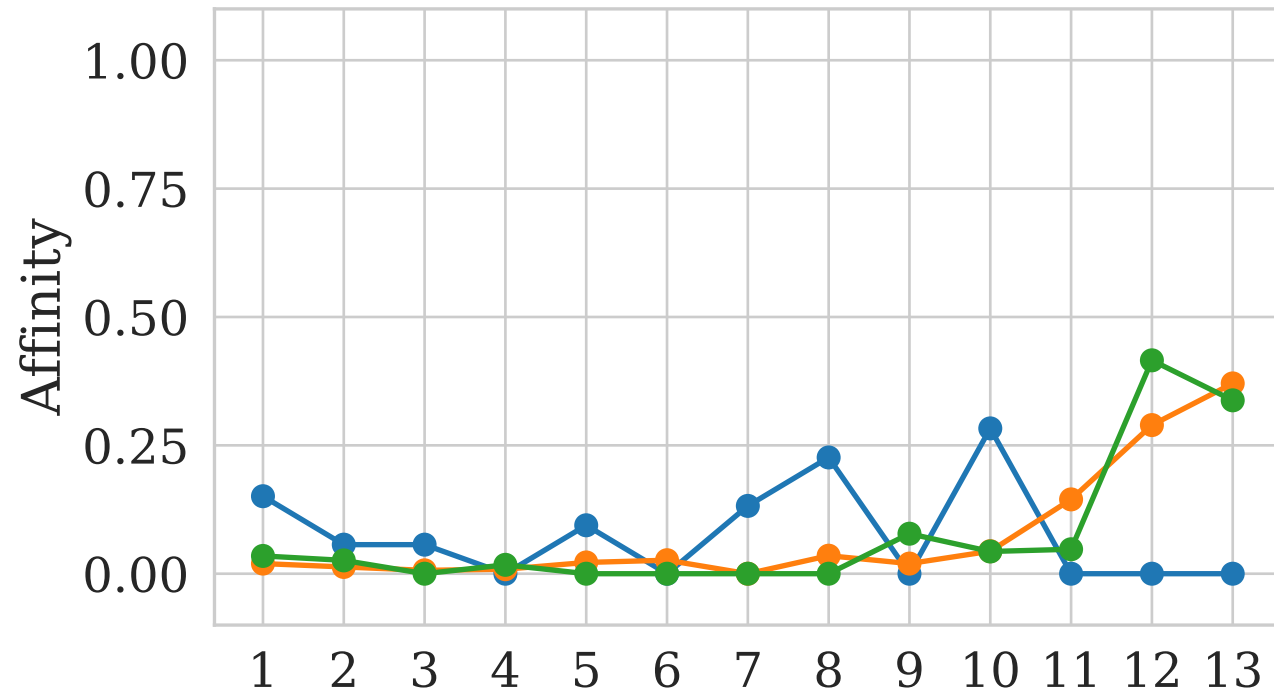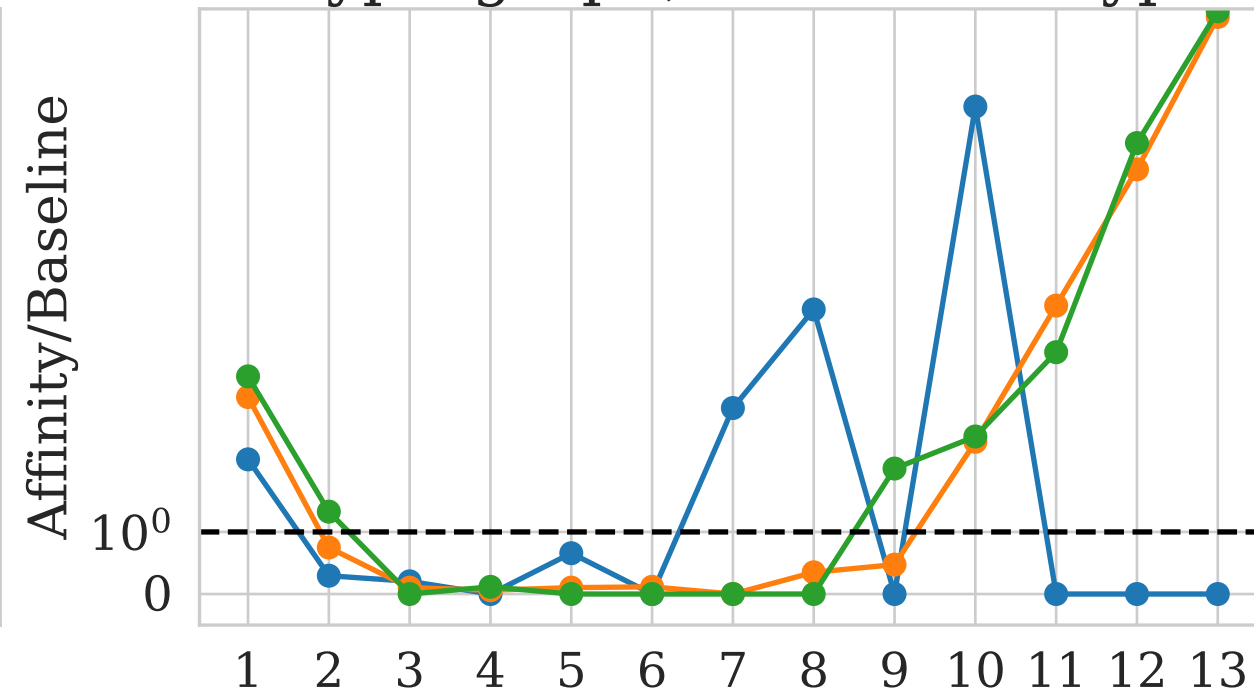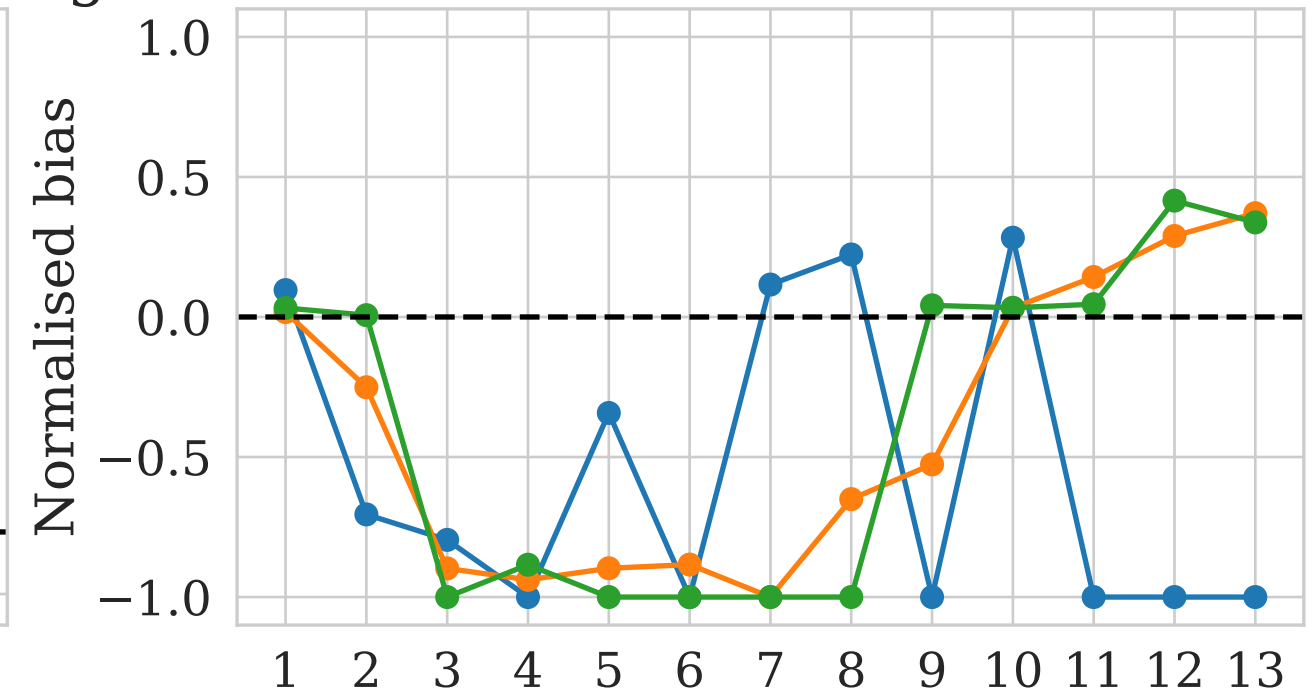

Class 0    Class 1    Class 2

12-uniform hypergraph, number of hyperedges: 60

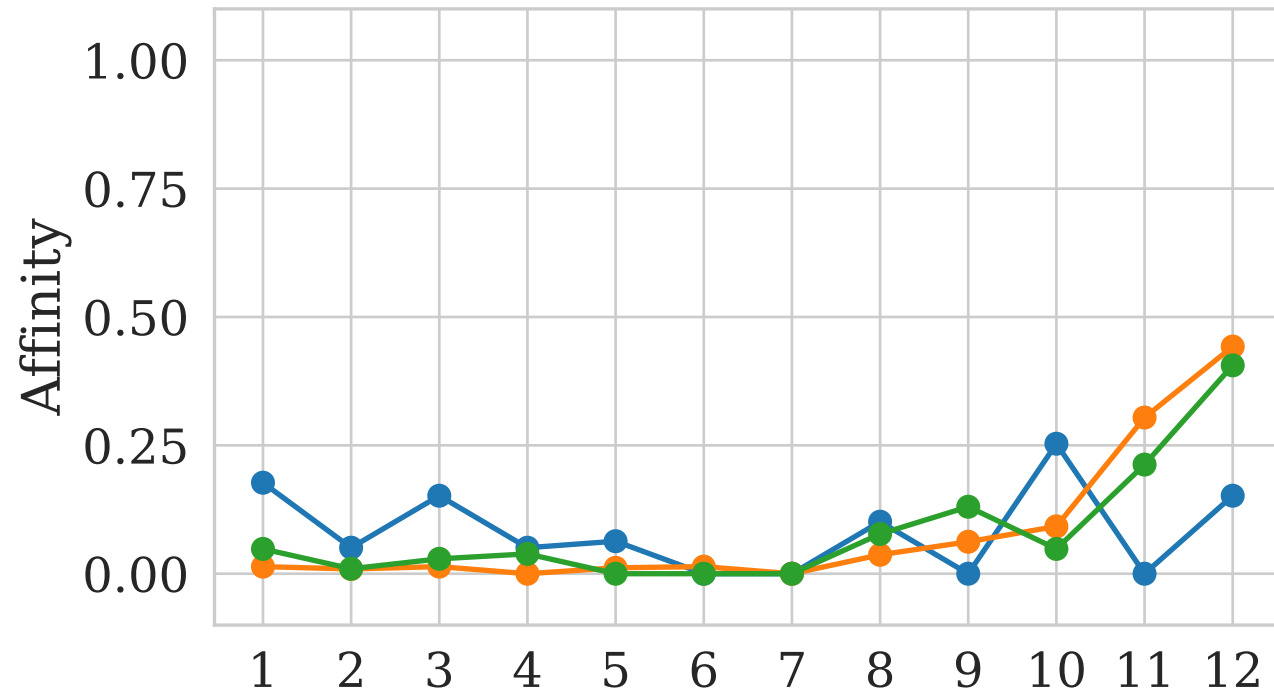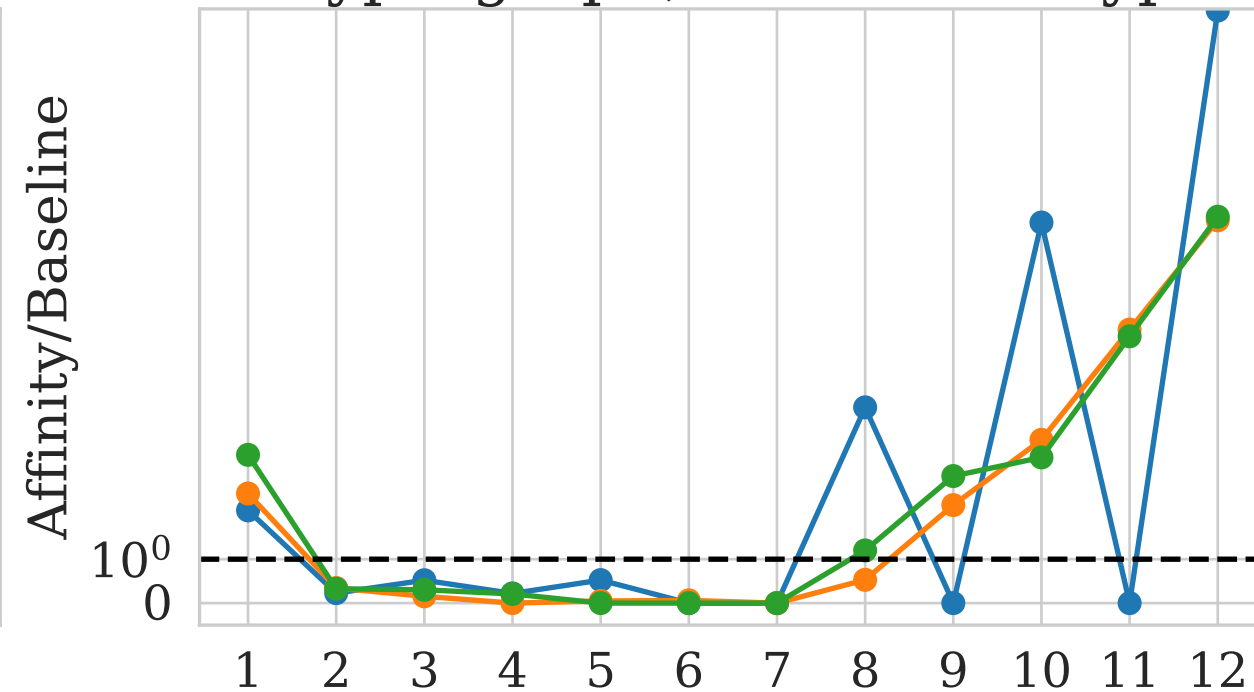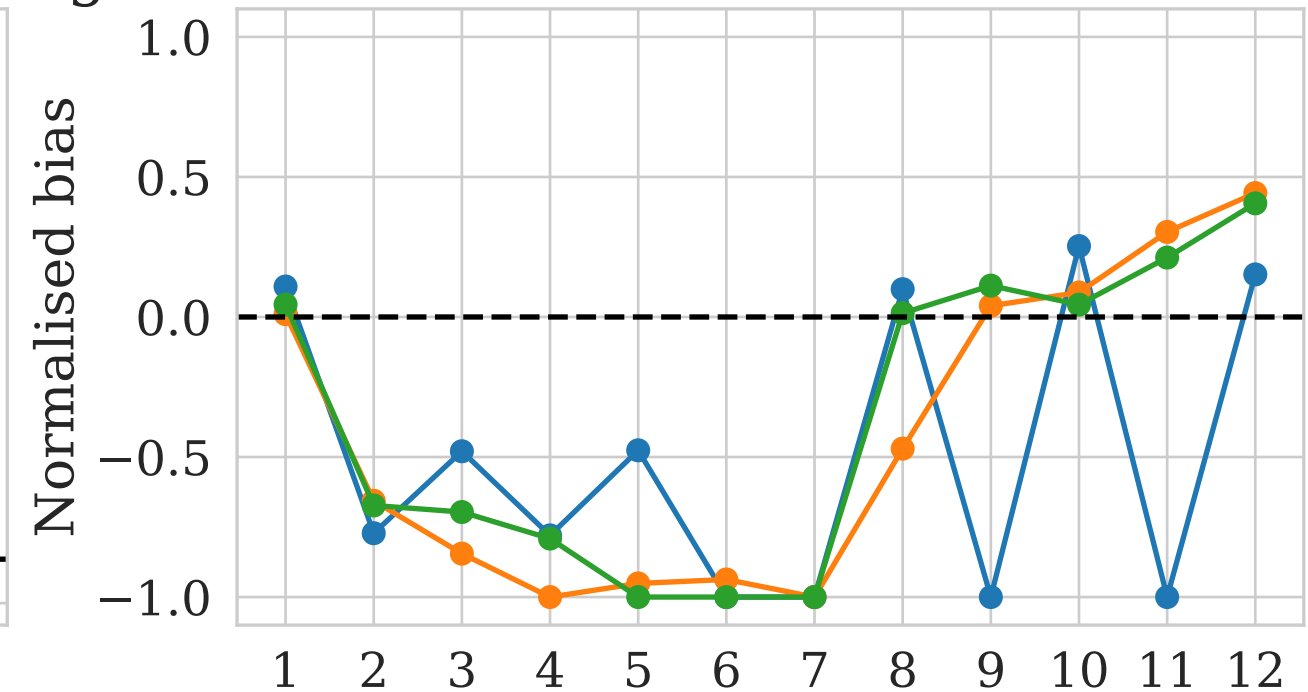

Class 0    Class 1    Class 2

15-uniform hypergraph, number of hyperedges: 41

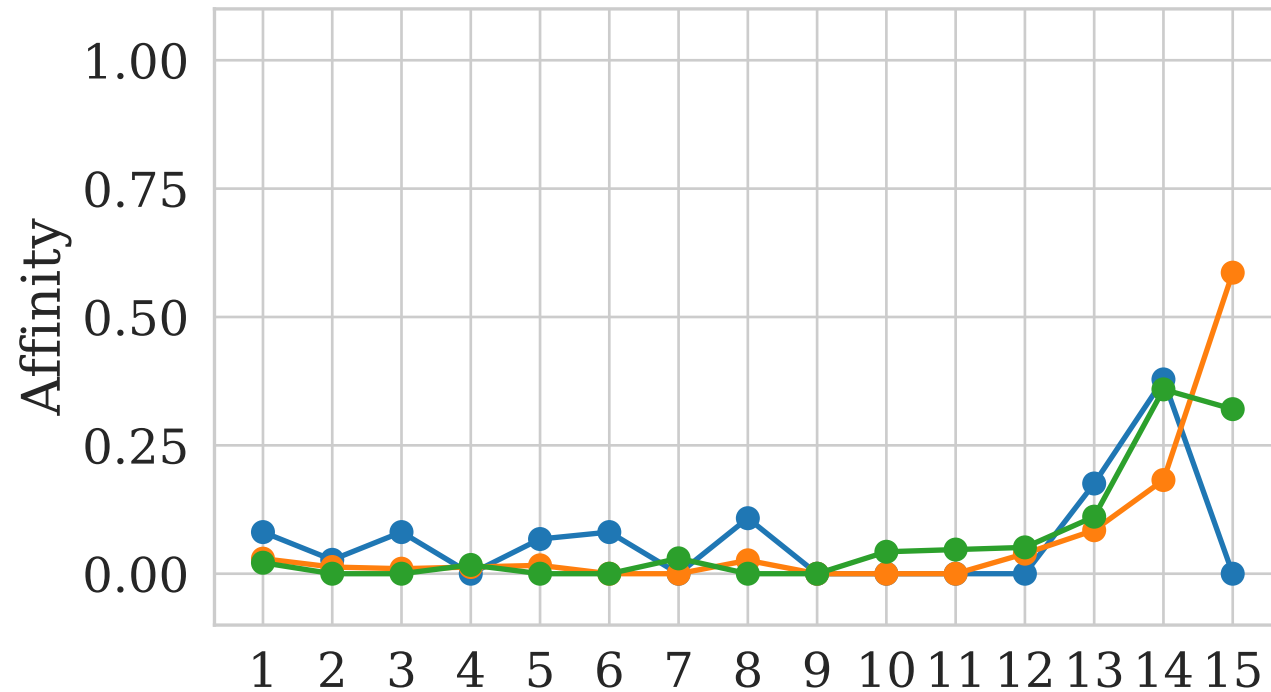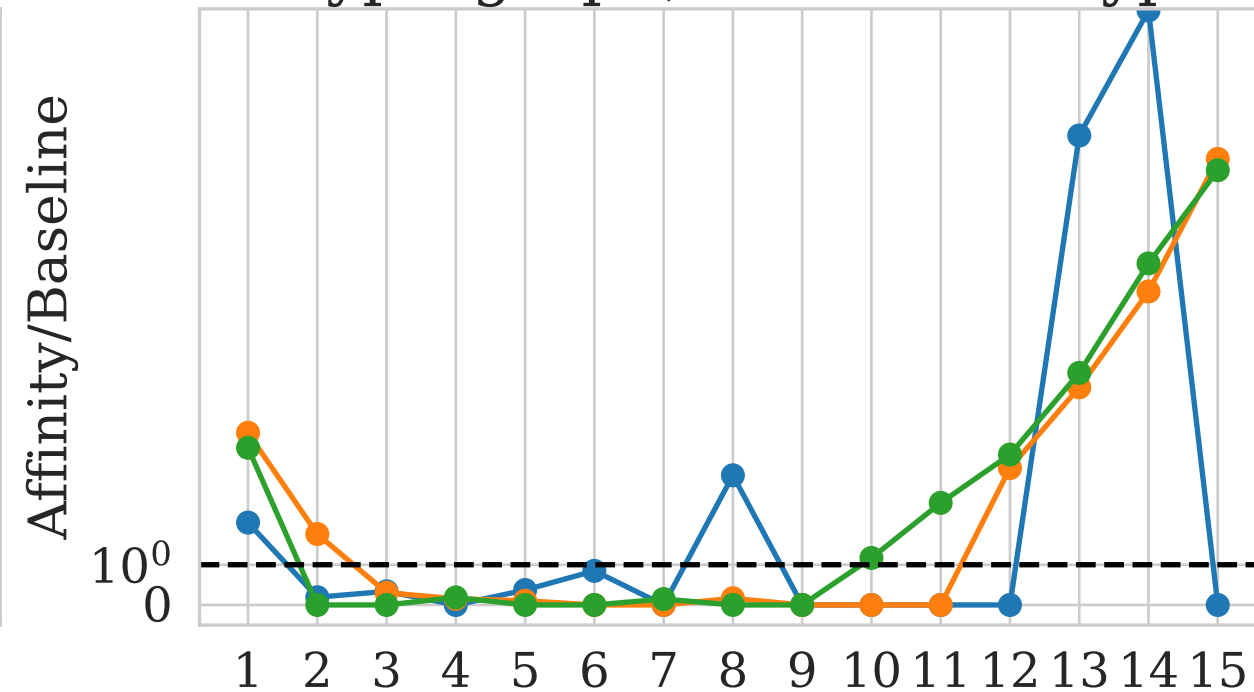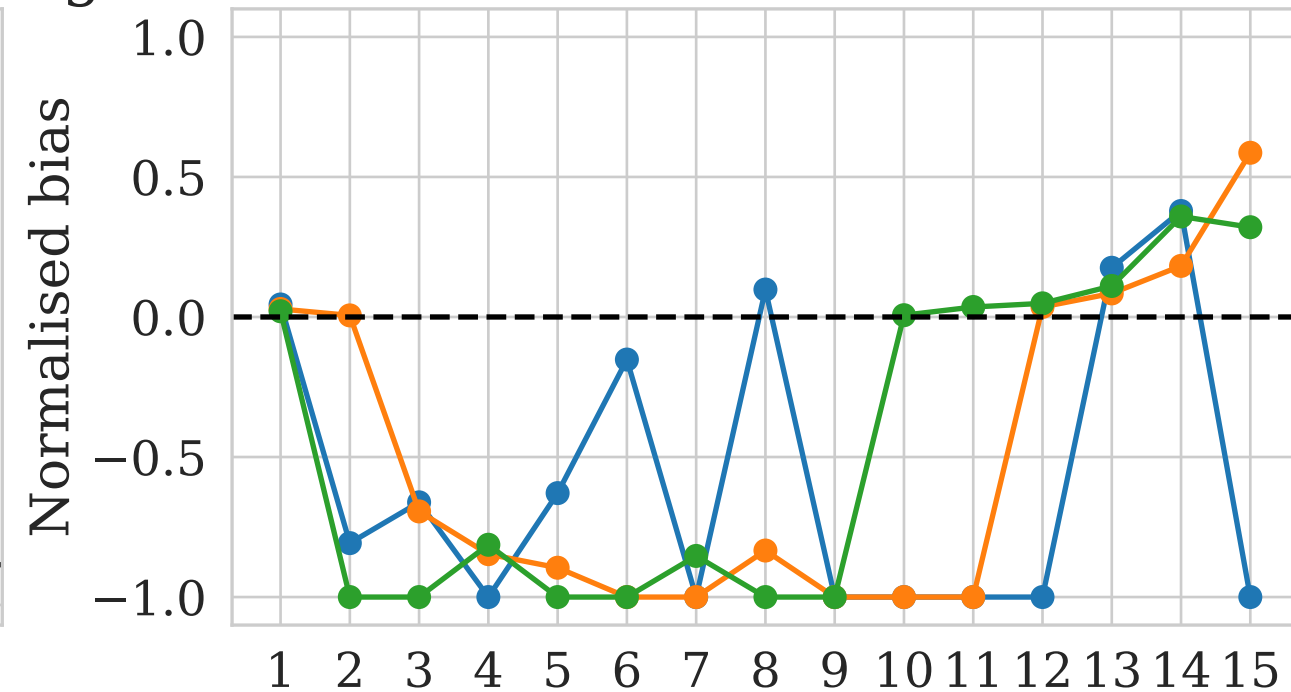

Class 0    Class 1    Class 2

14-uniform hypergraph, number of hyperedges: 39

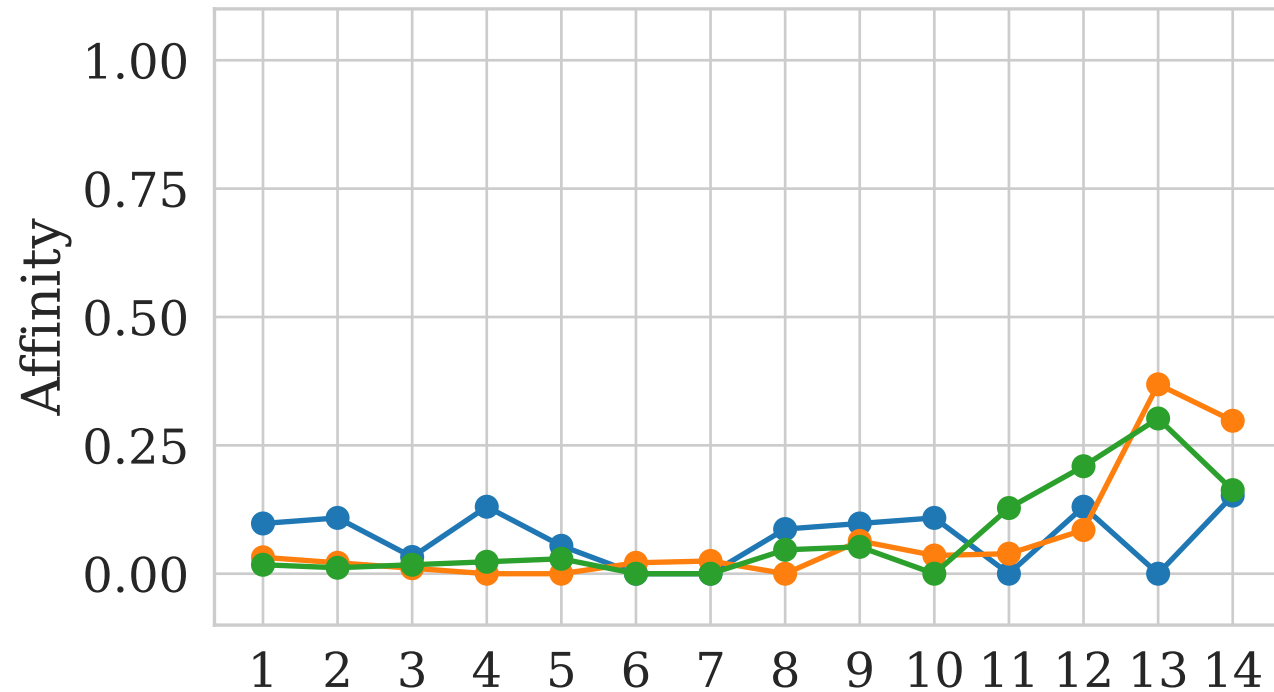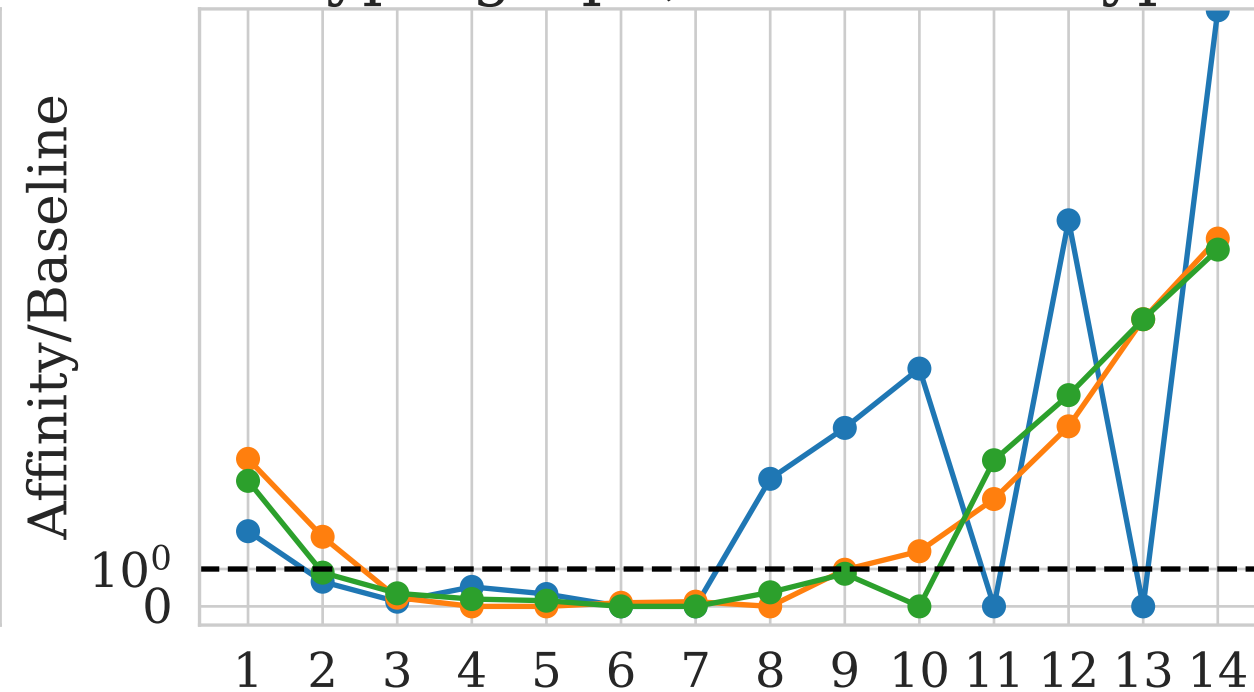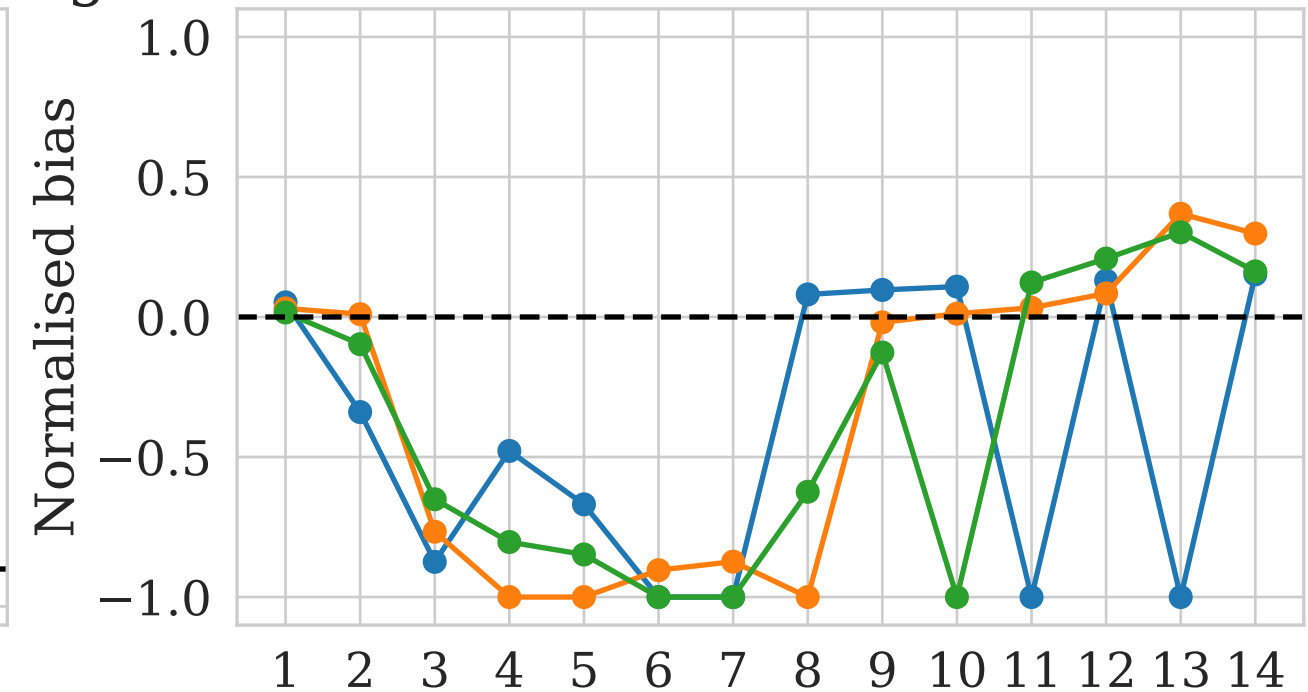

Class 0 Class 1 Class 2

17-uniform hypergraph, number of hyperedges: 29

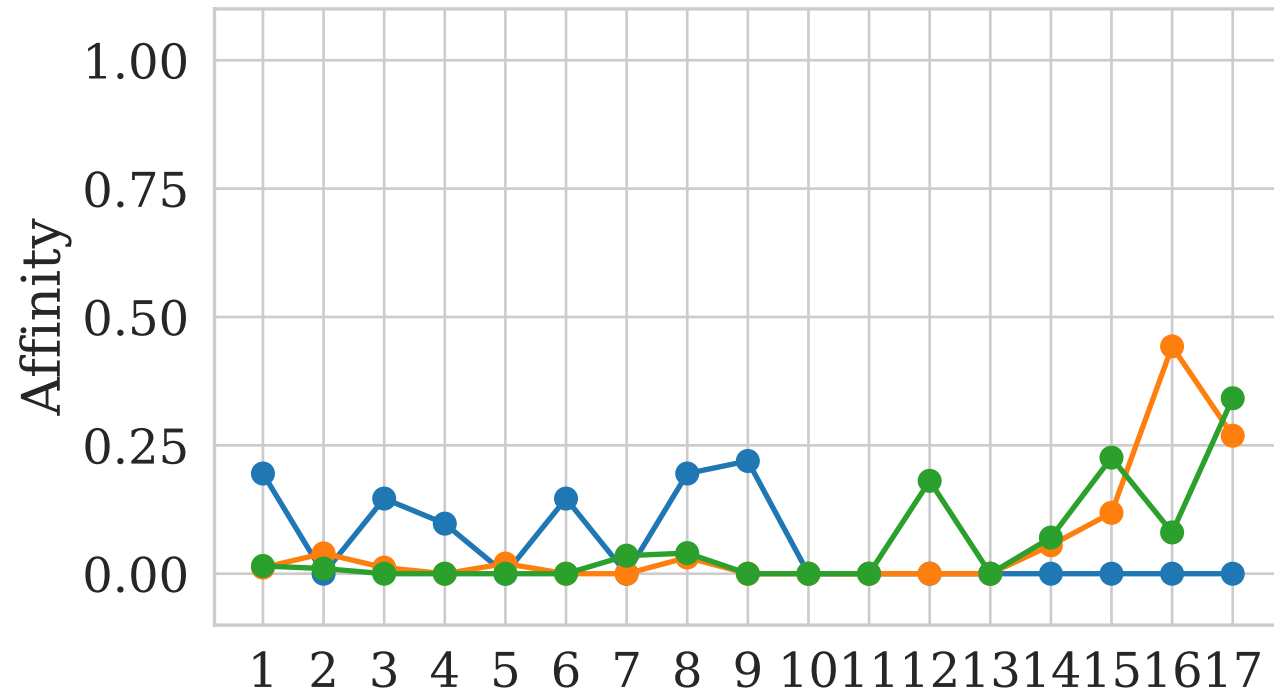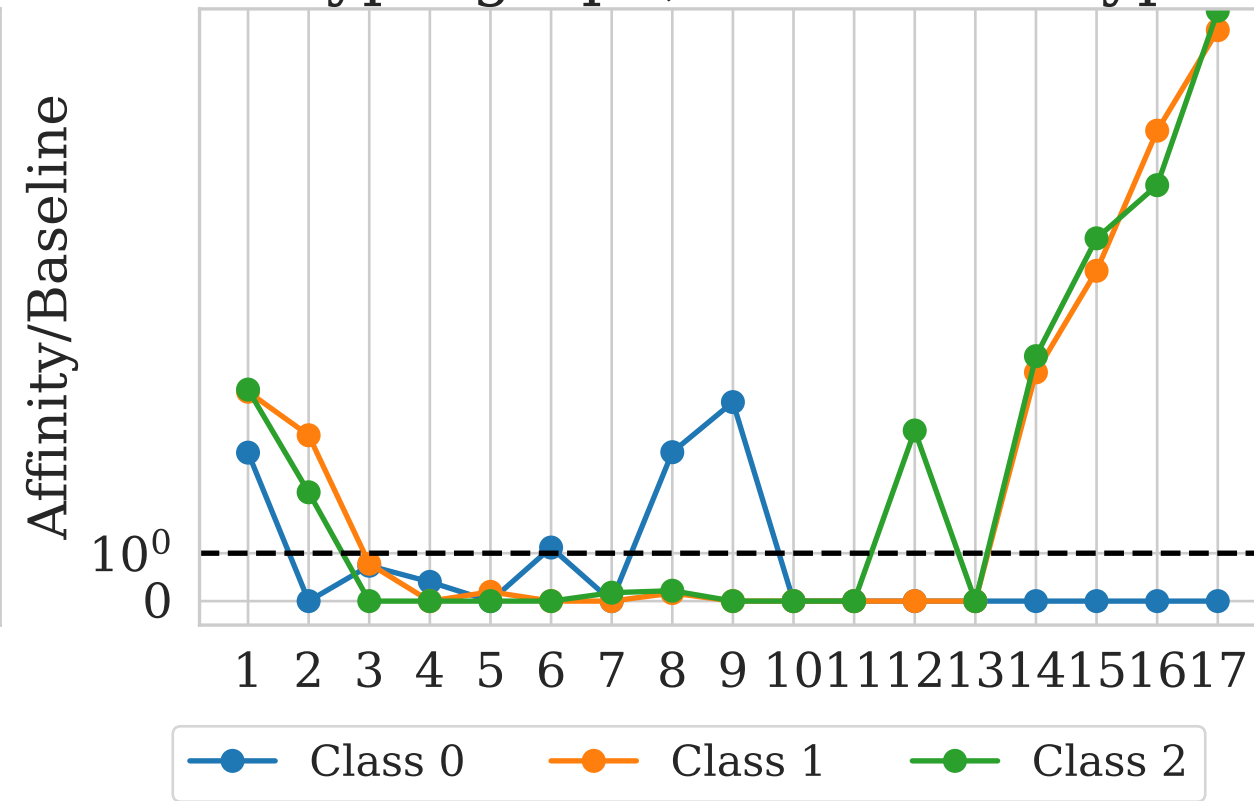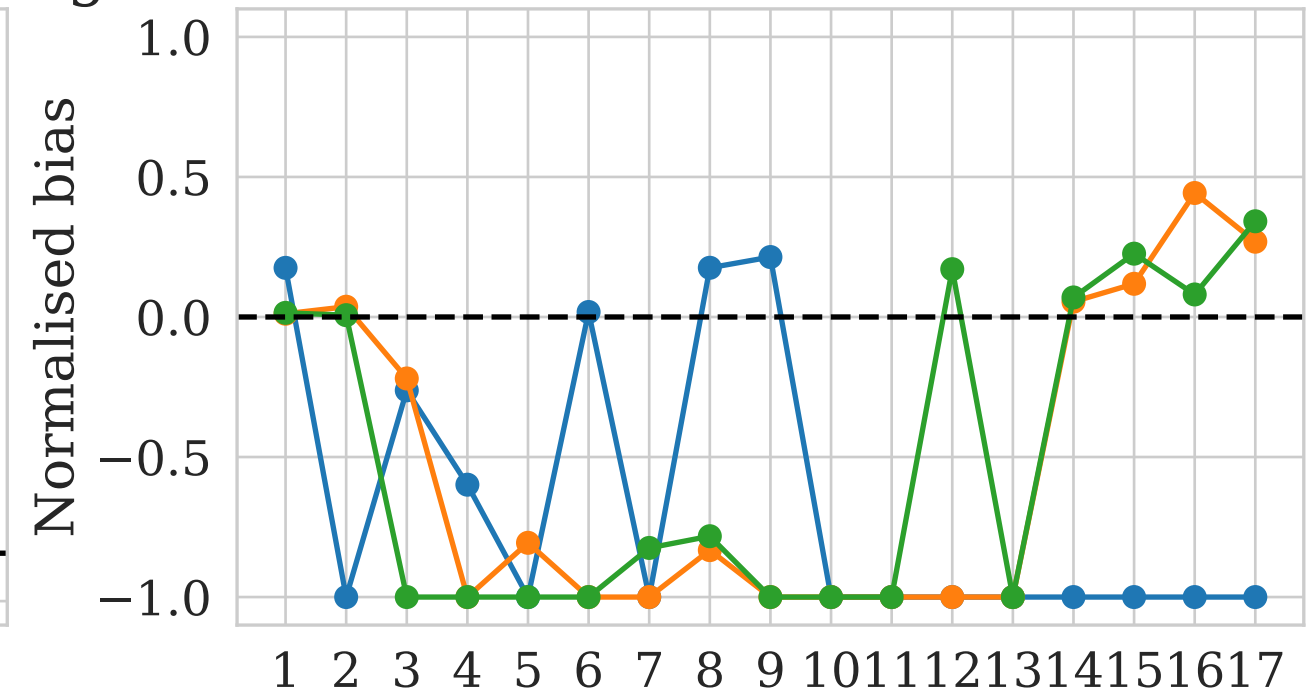

16-uniform hypergraph, number of hyperedges: 23

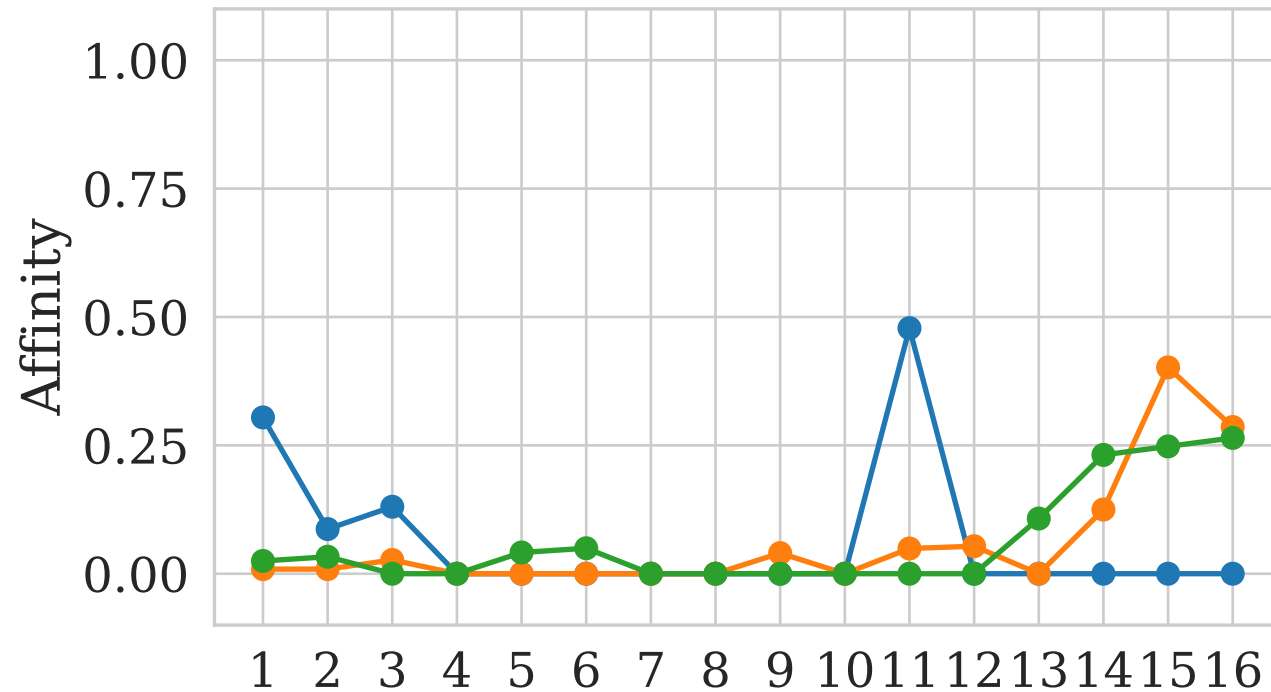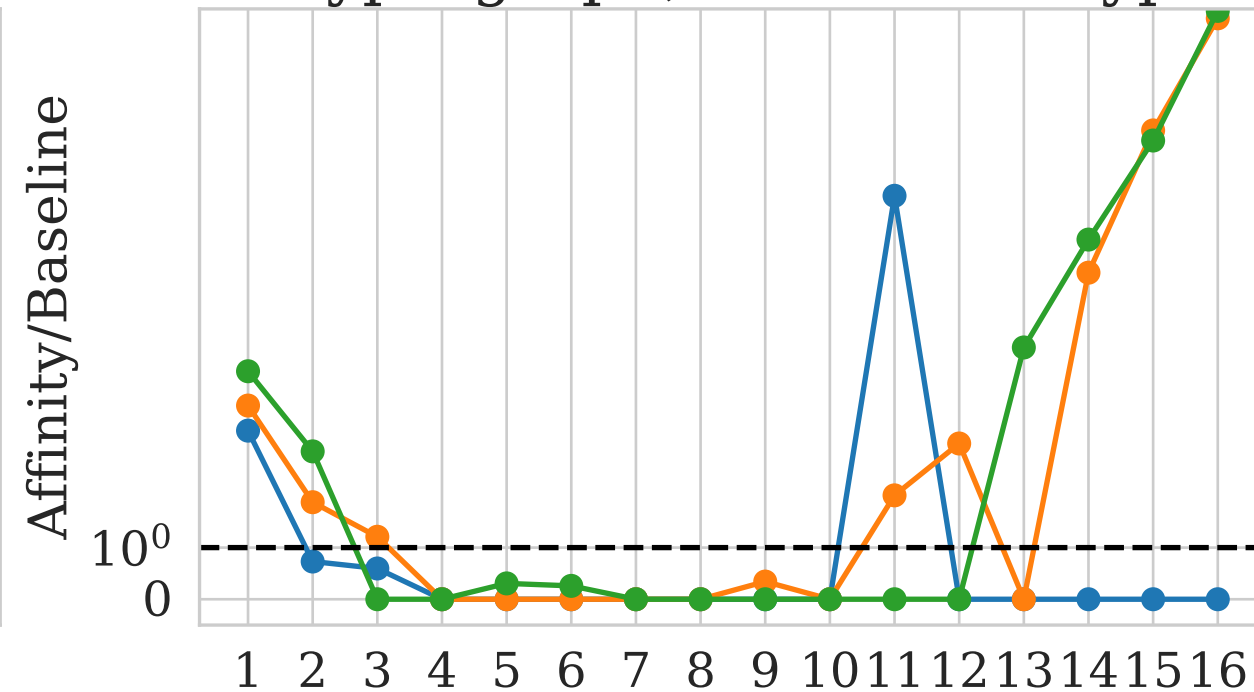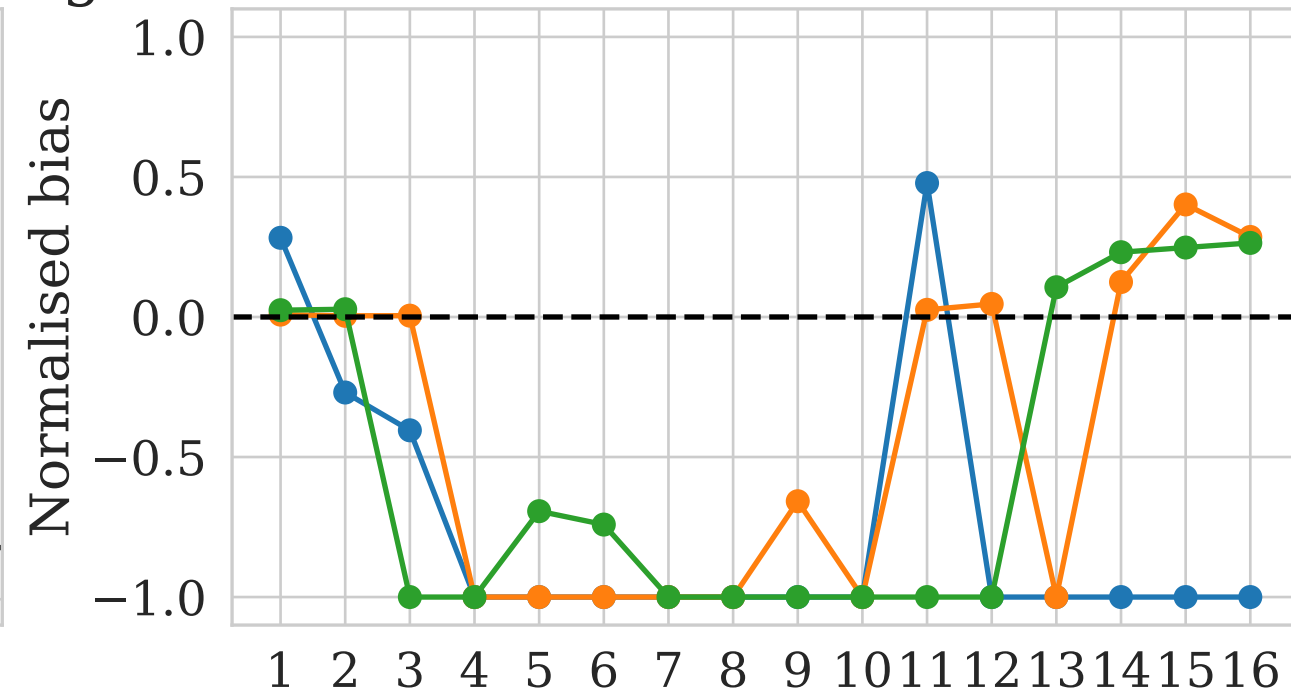

Class 0 Class 1 Class 2



19-uniform hypergraph, number of hyperedges: 18

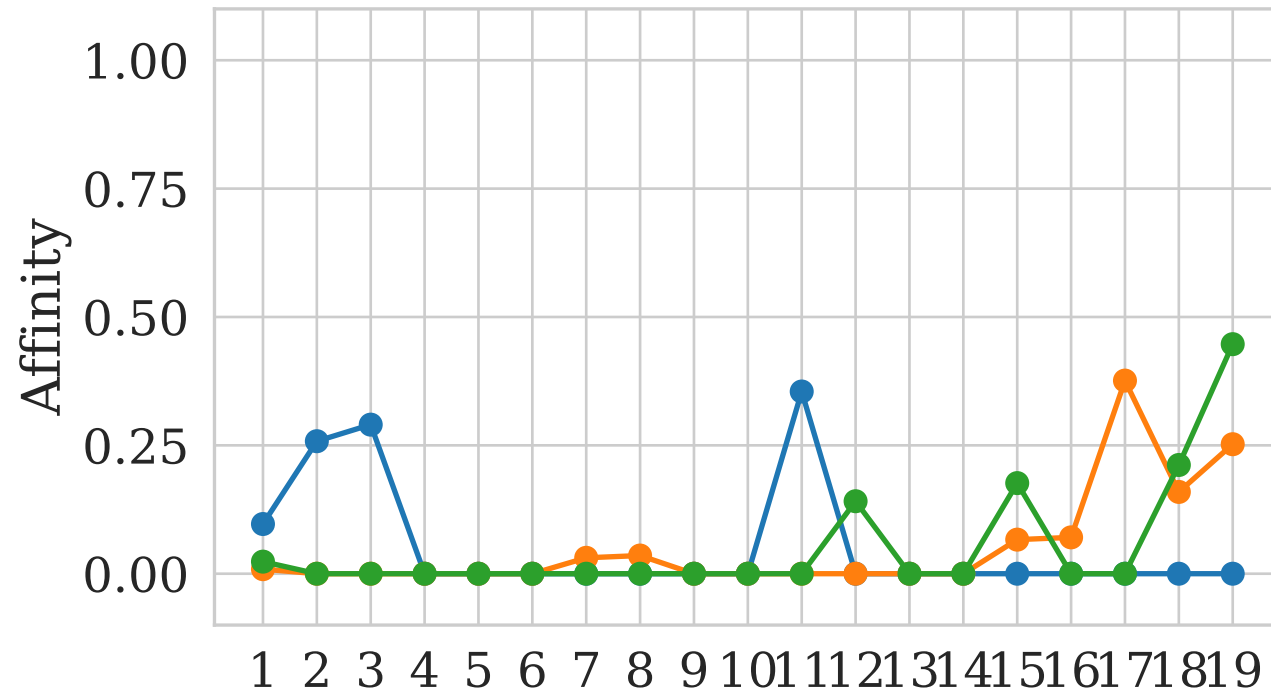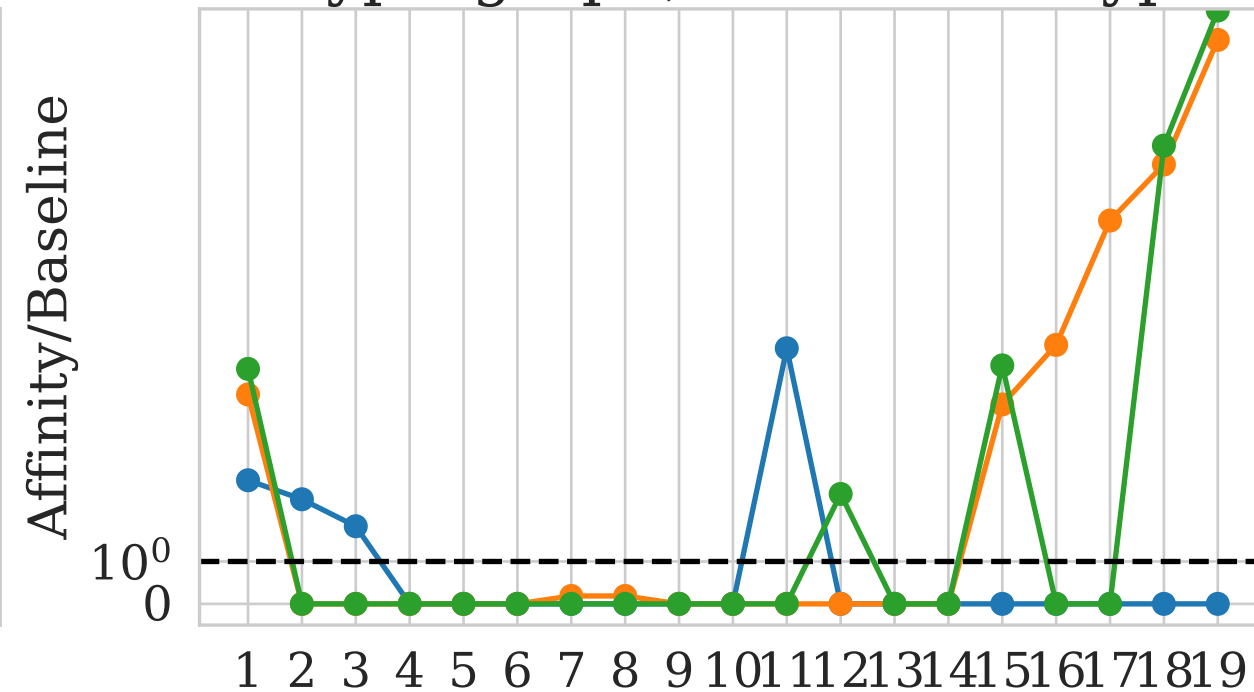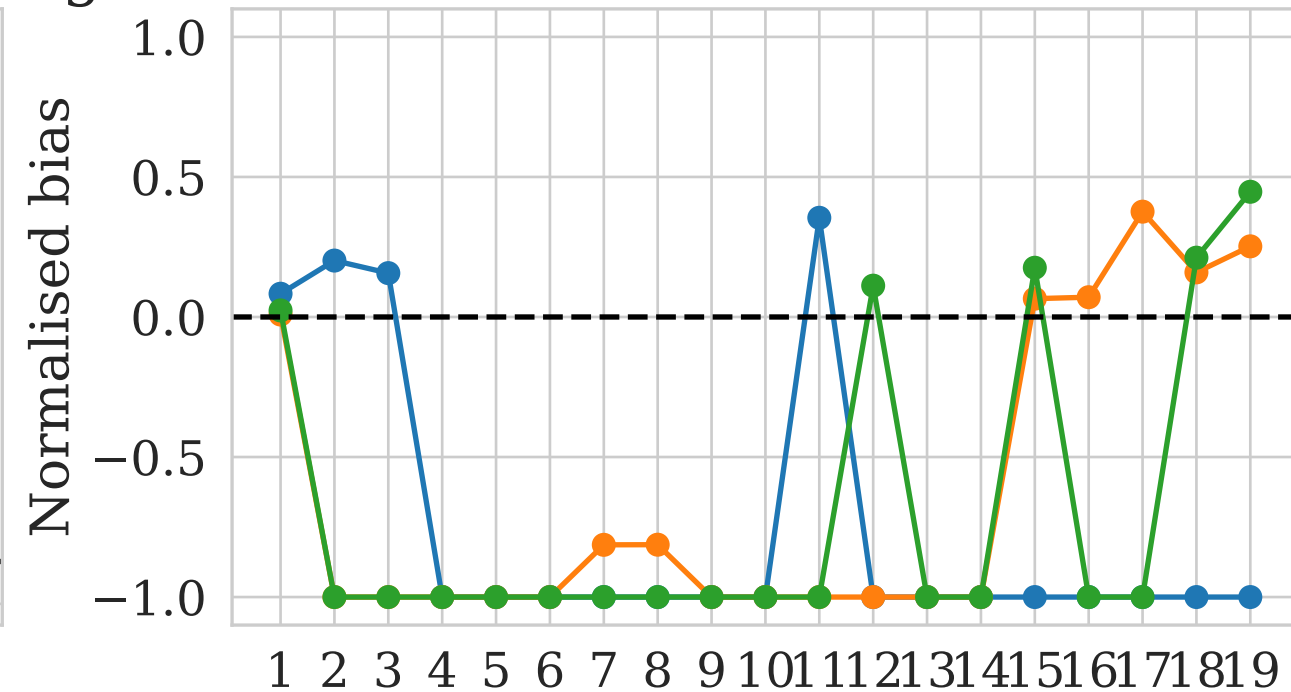

Class 0 Class 1 Class 2

18-uniform hypergraph, number of hyperedges: 15

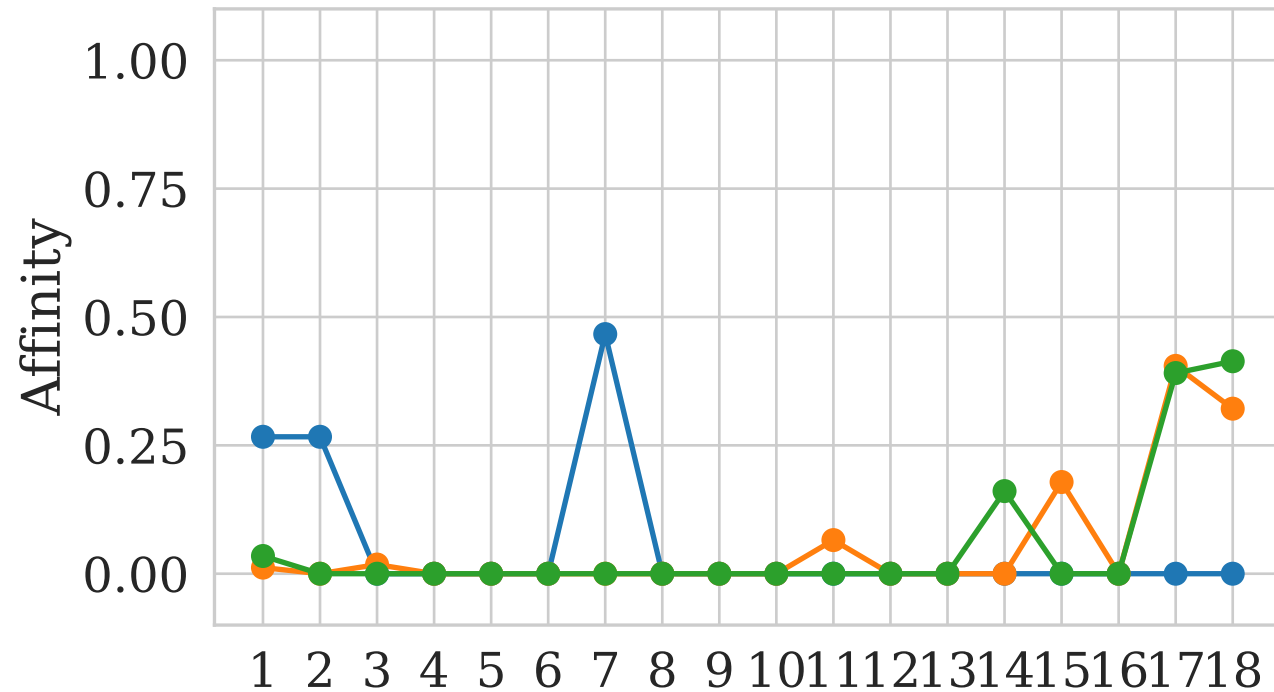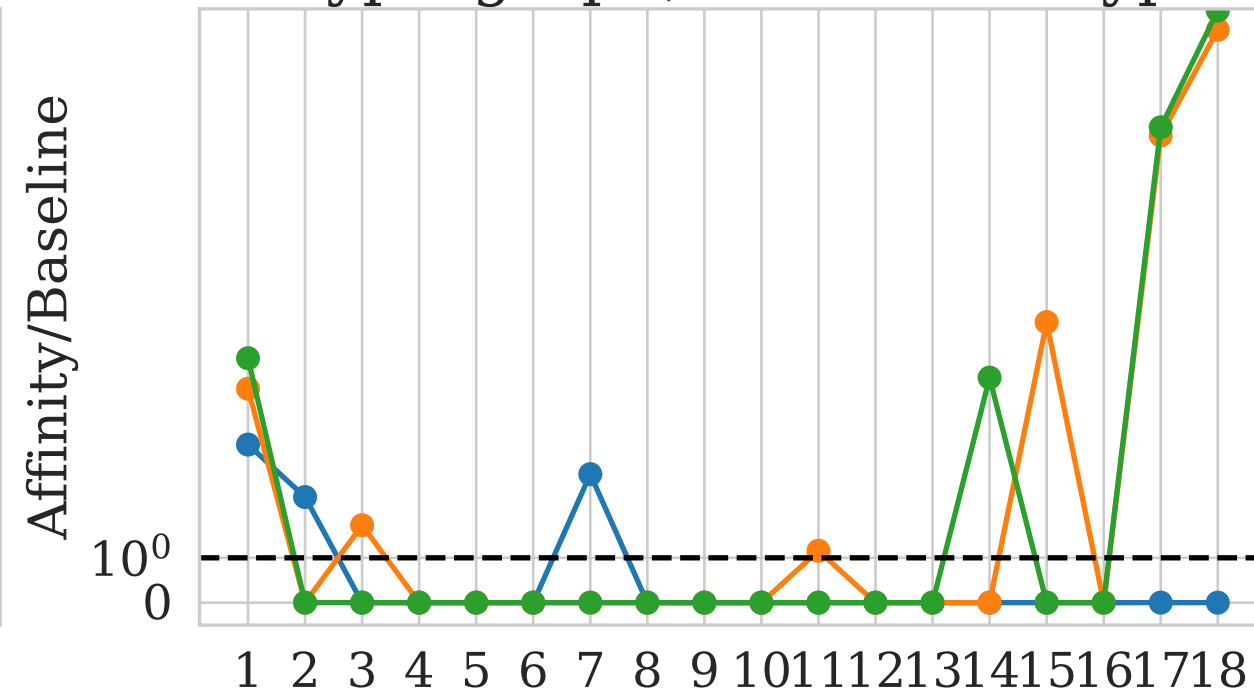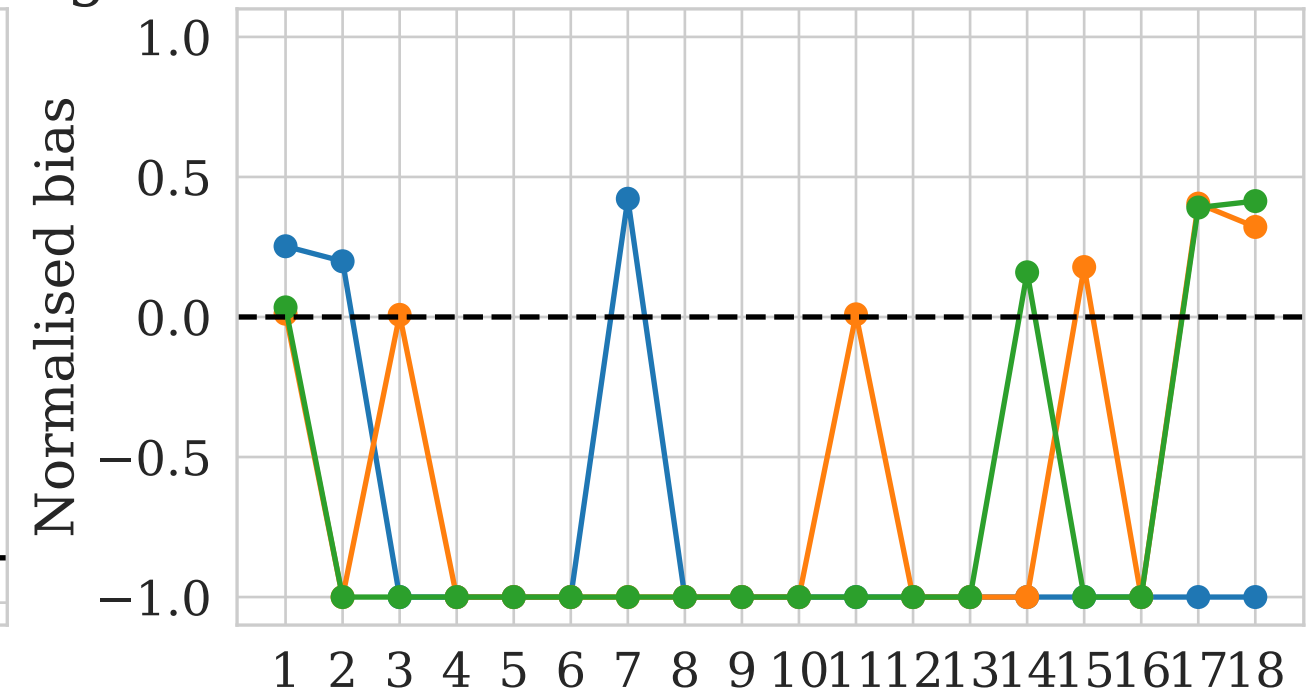

Class 0 Class 1 Class 2

23-uniform hypergraph, number of hyperedges: 13

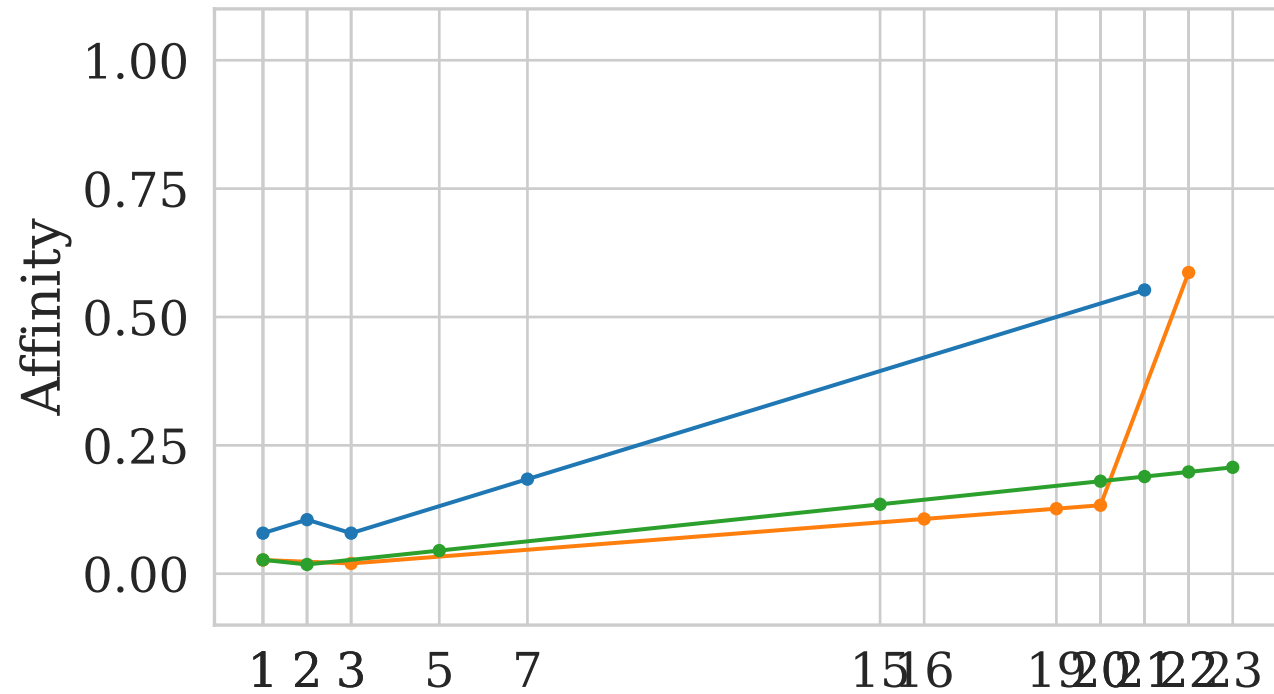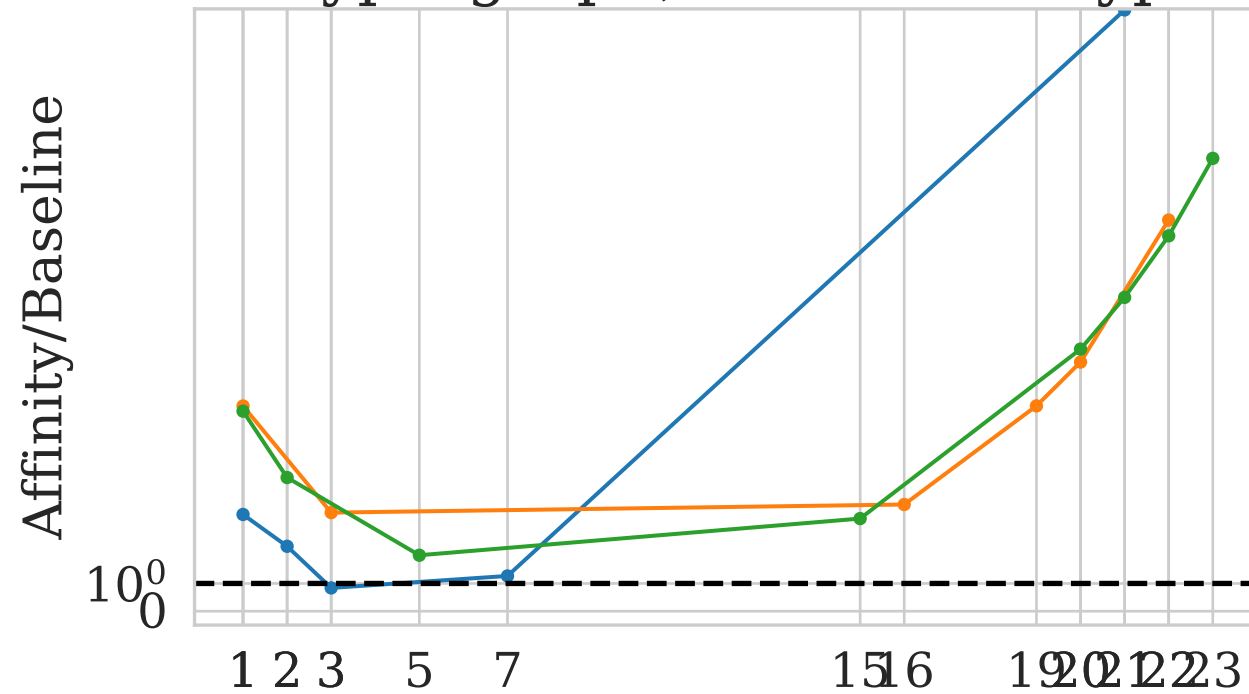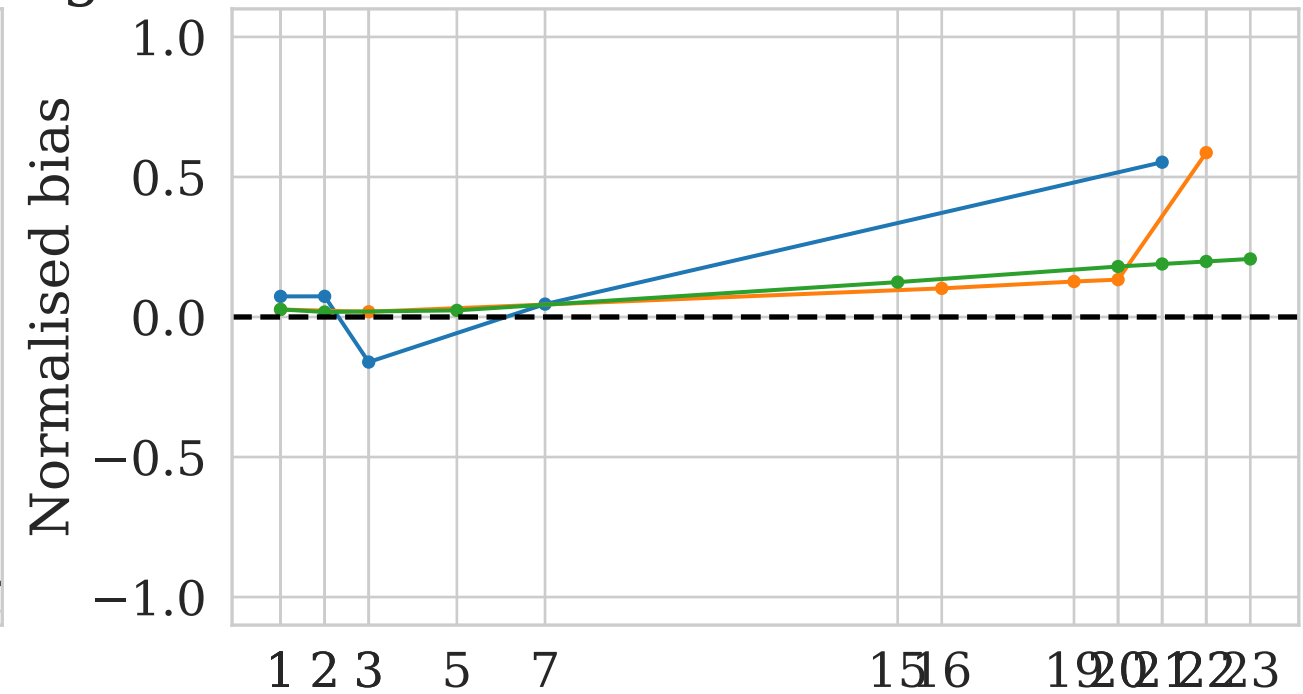

Class 0 Class 1 Class 2

22-uniform hypergraph, number of hyperedges: 11

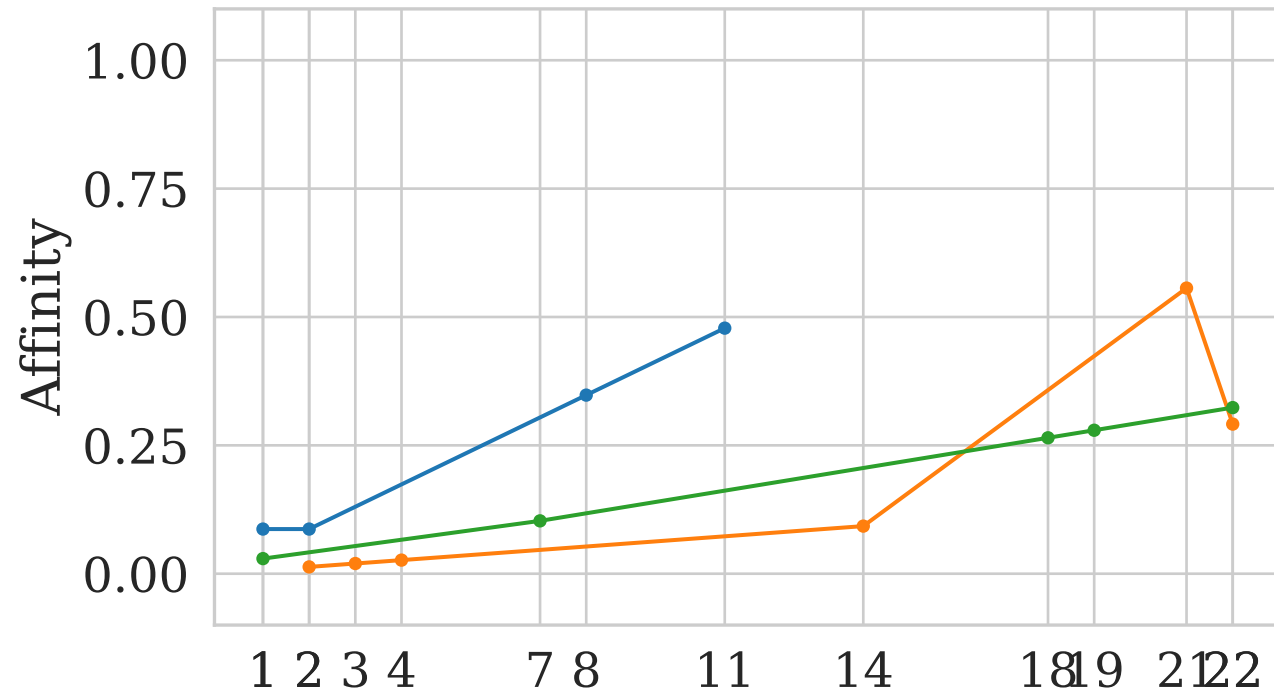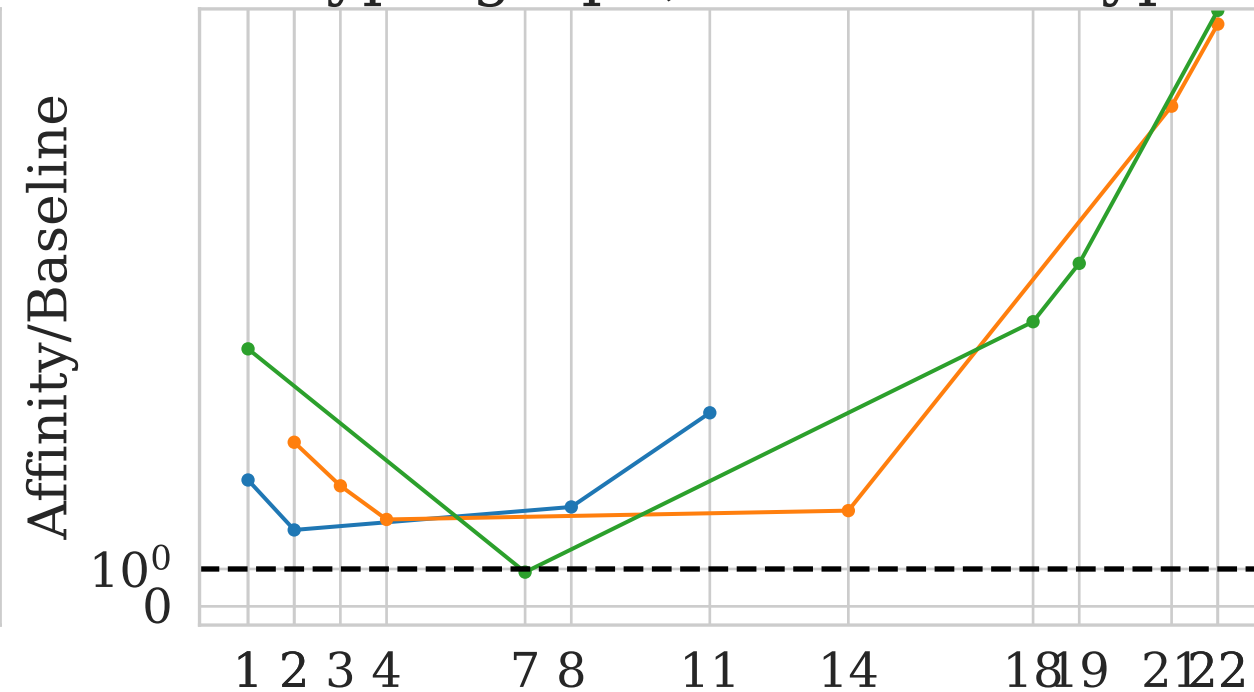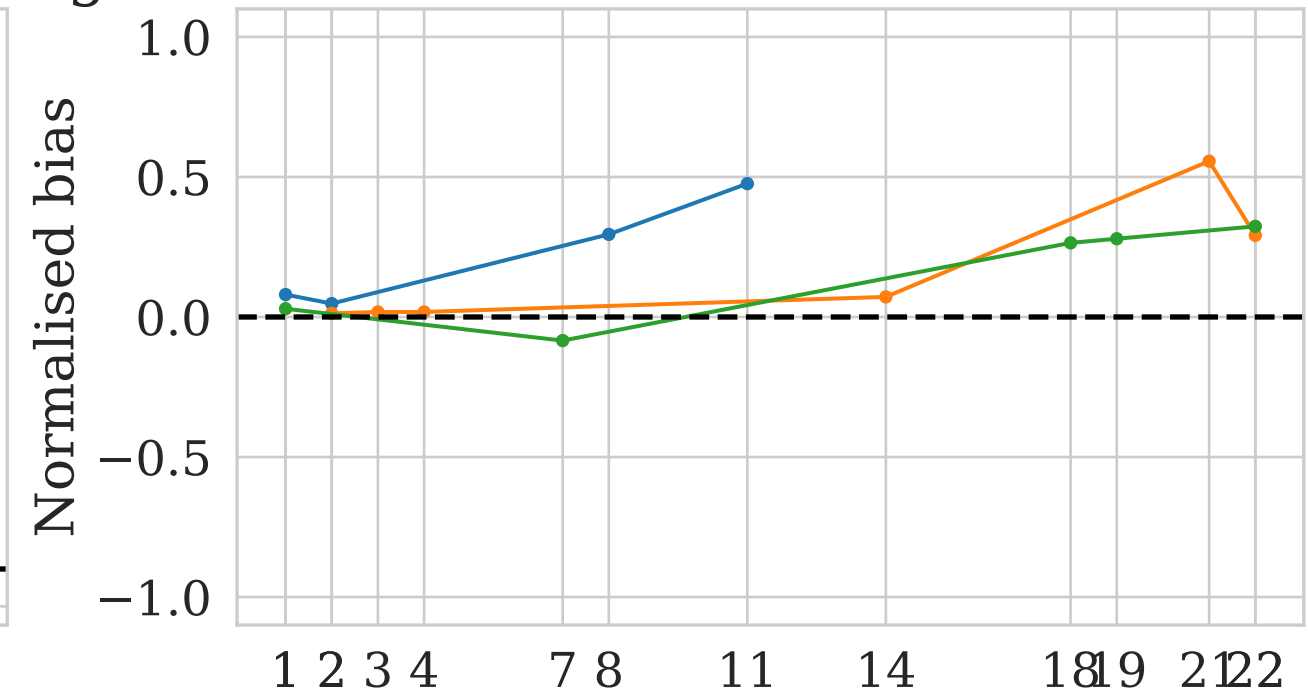

Class 0 Class 1 Class 2

24-uniform hypergraph, number of hyperedges: 9

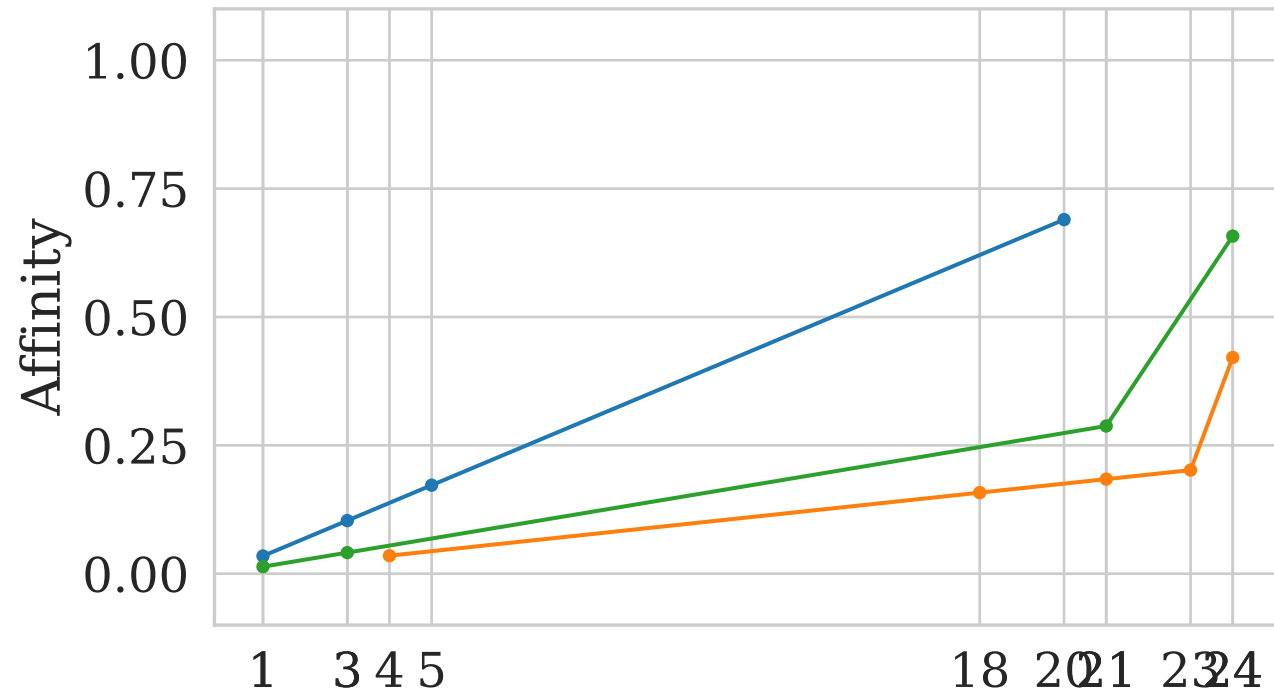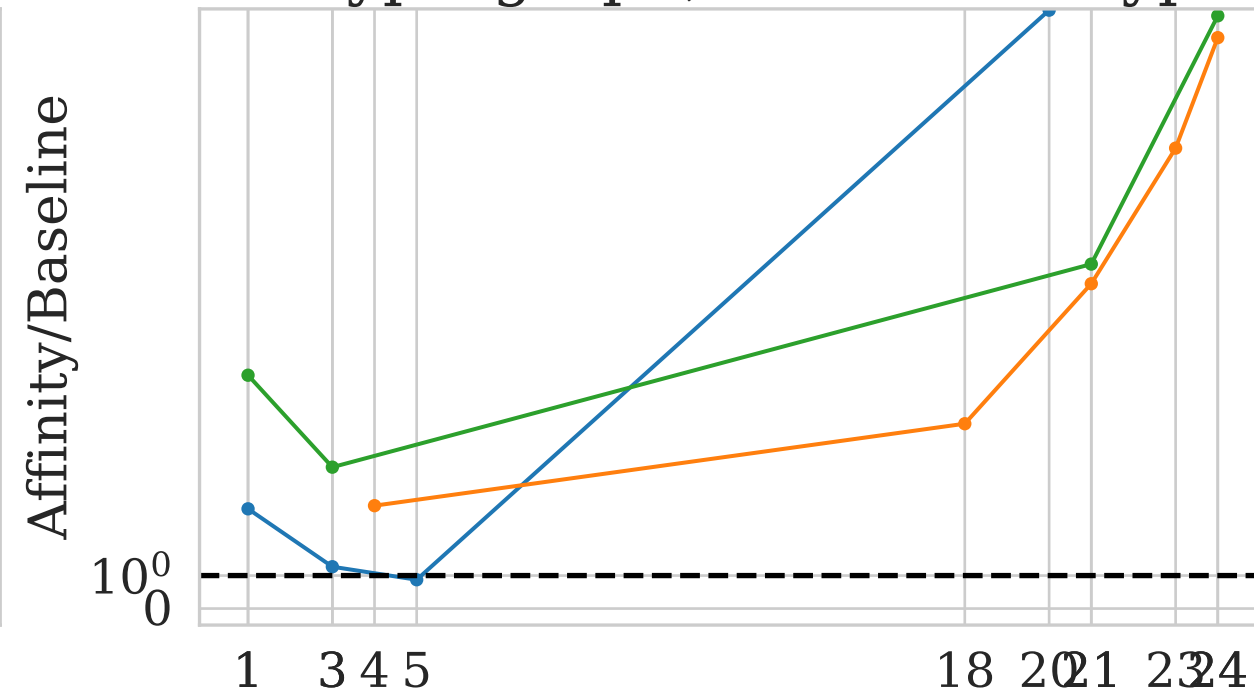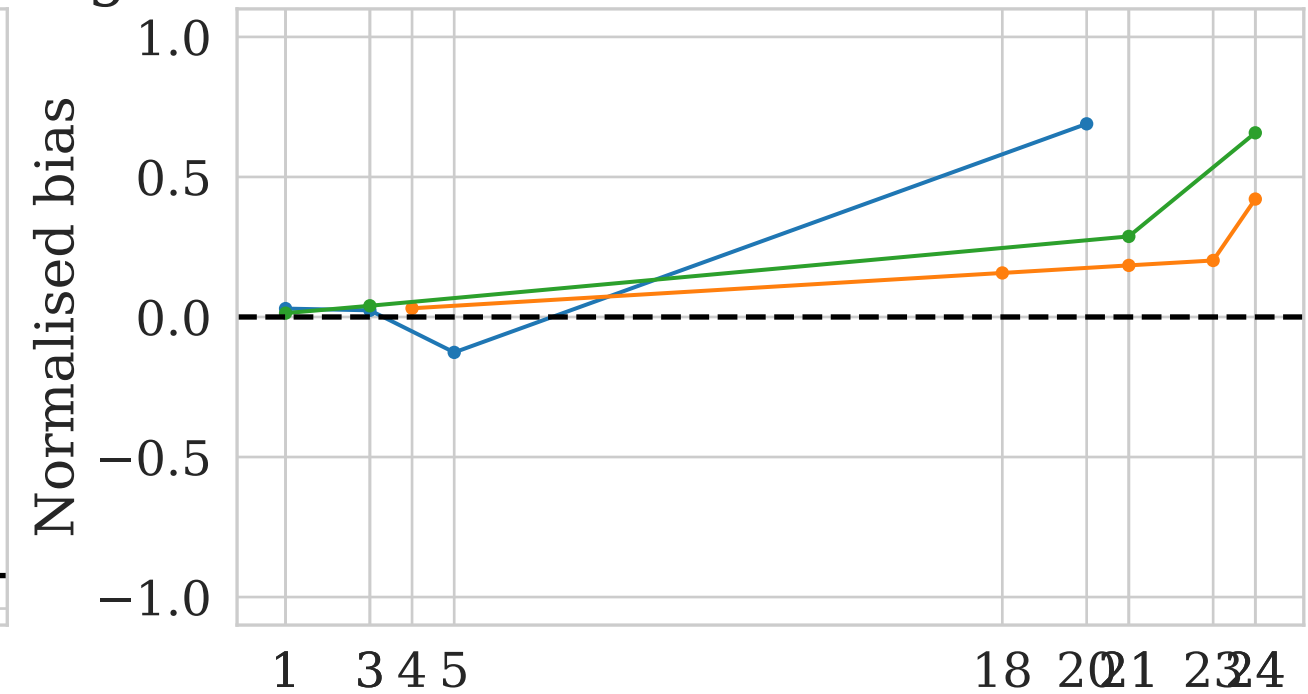

Class 0 Class 1 Class 2

21-uniform hypergraph, number of hyperedges: 9

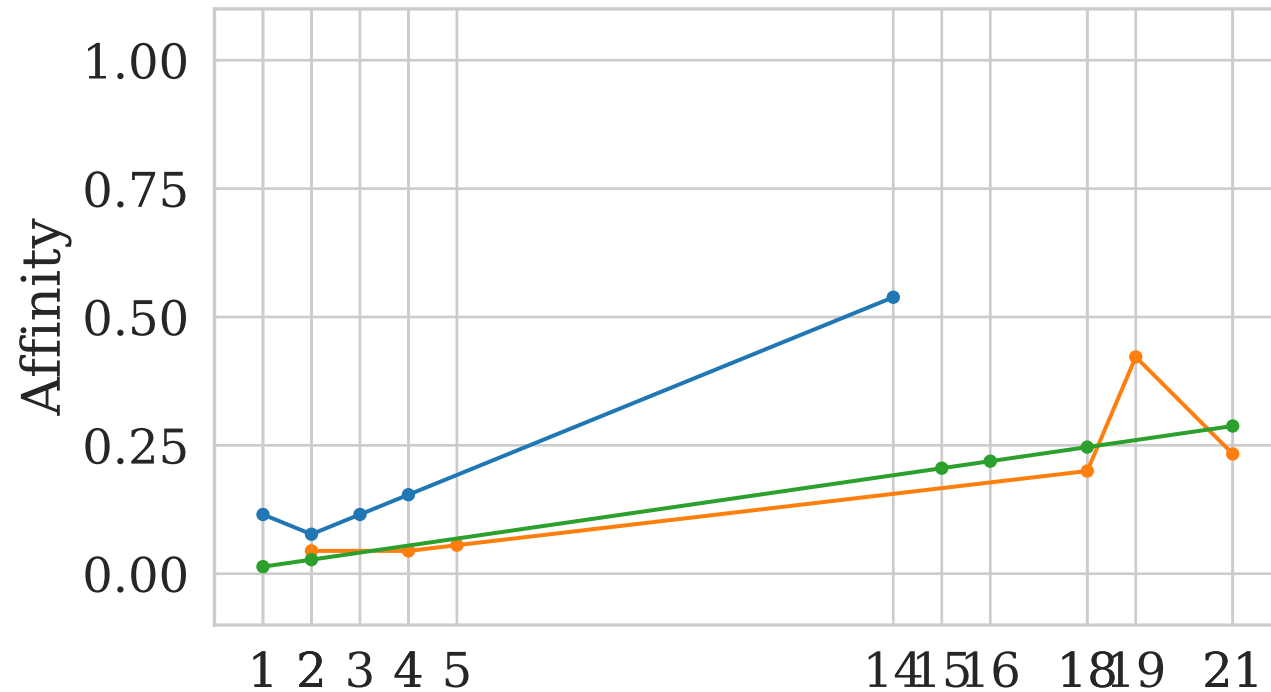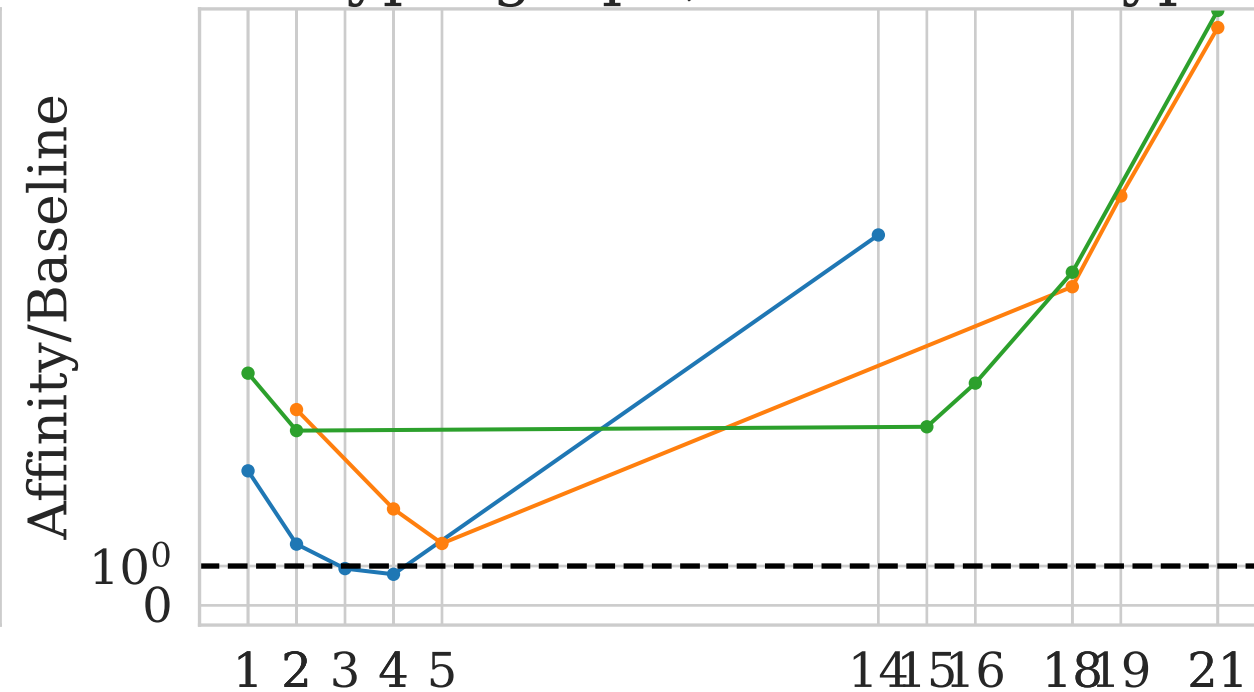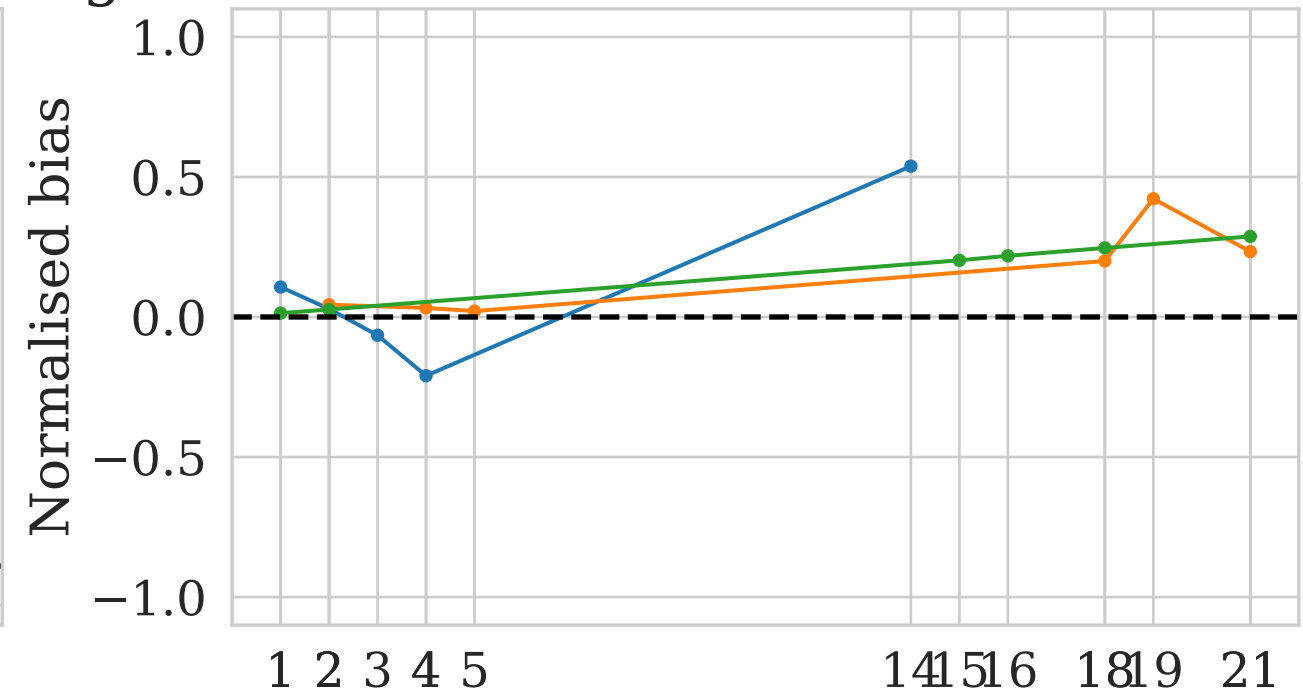

Class 0    Class 1    Class 2

26-uniform hypergraph, number of hyperedges: 8

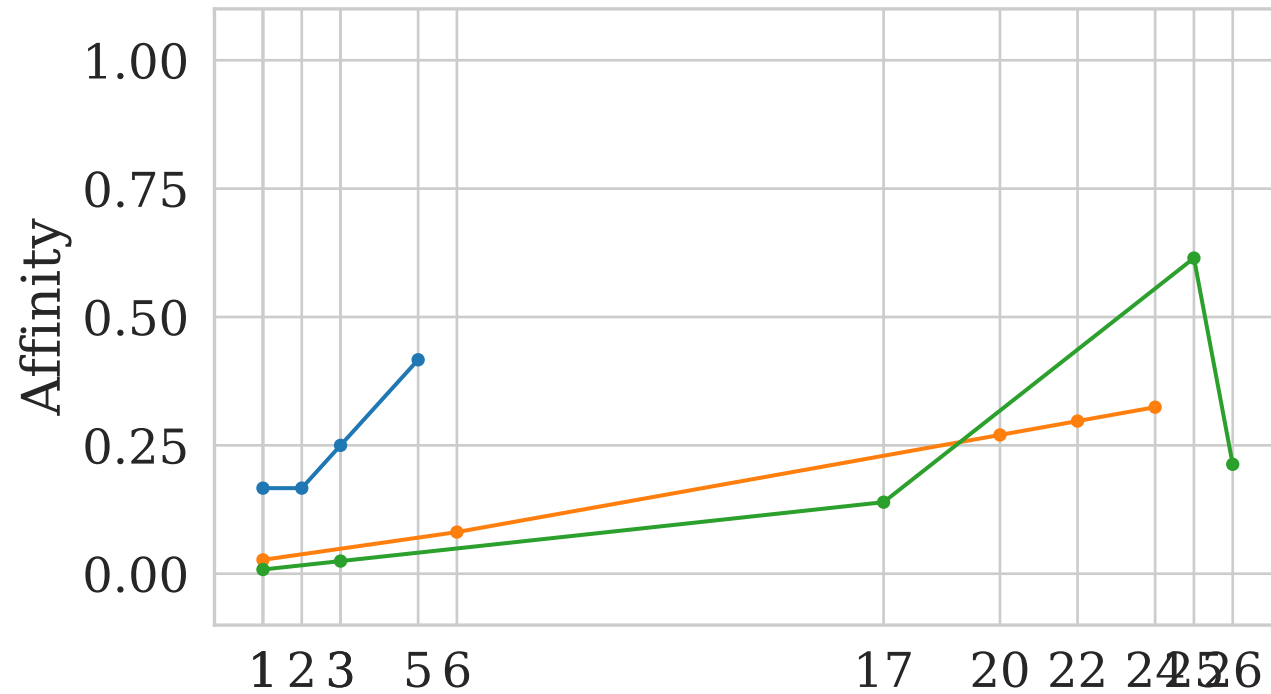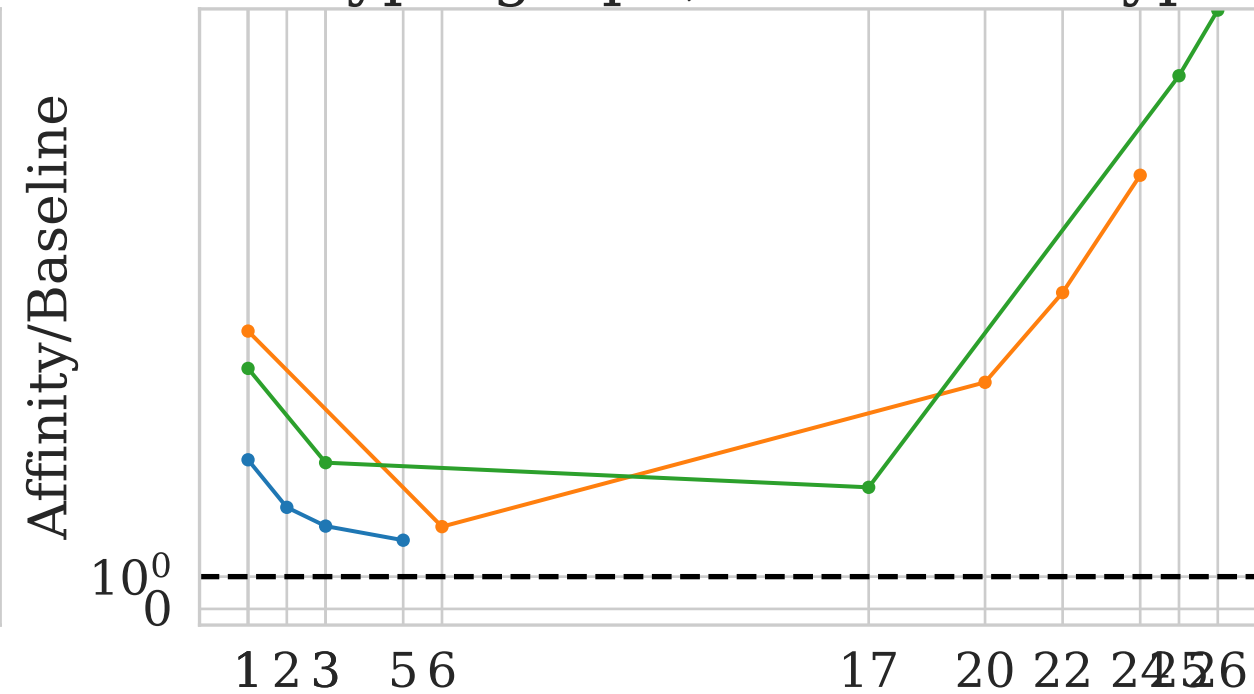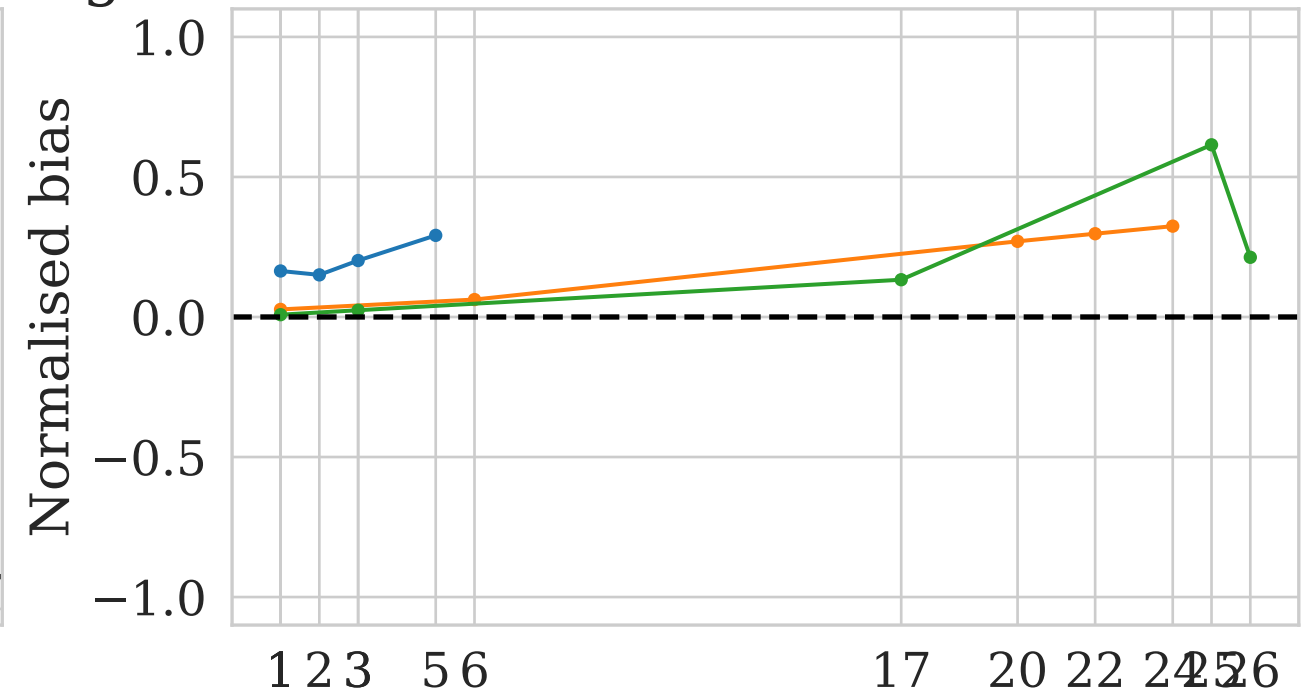

Class 0    Class 1    Class 2

28-uniform hypergraph, number of hyperedges: 7

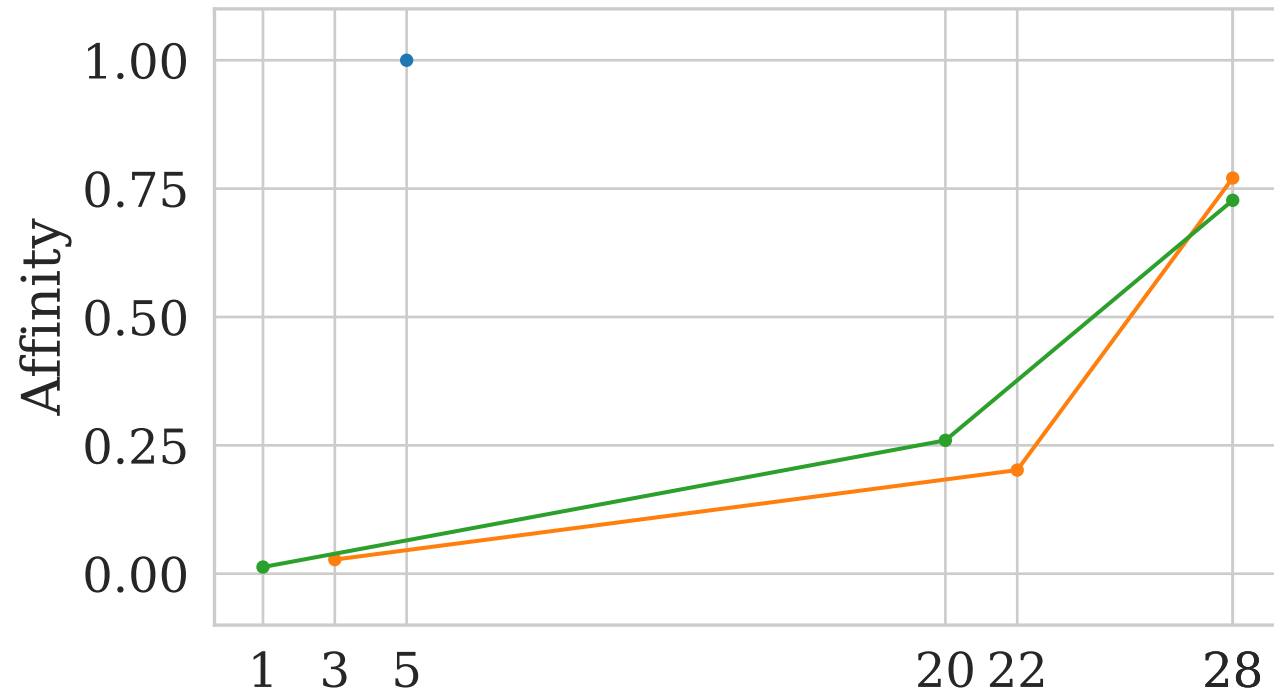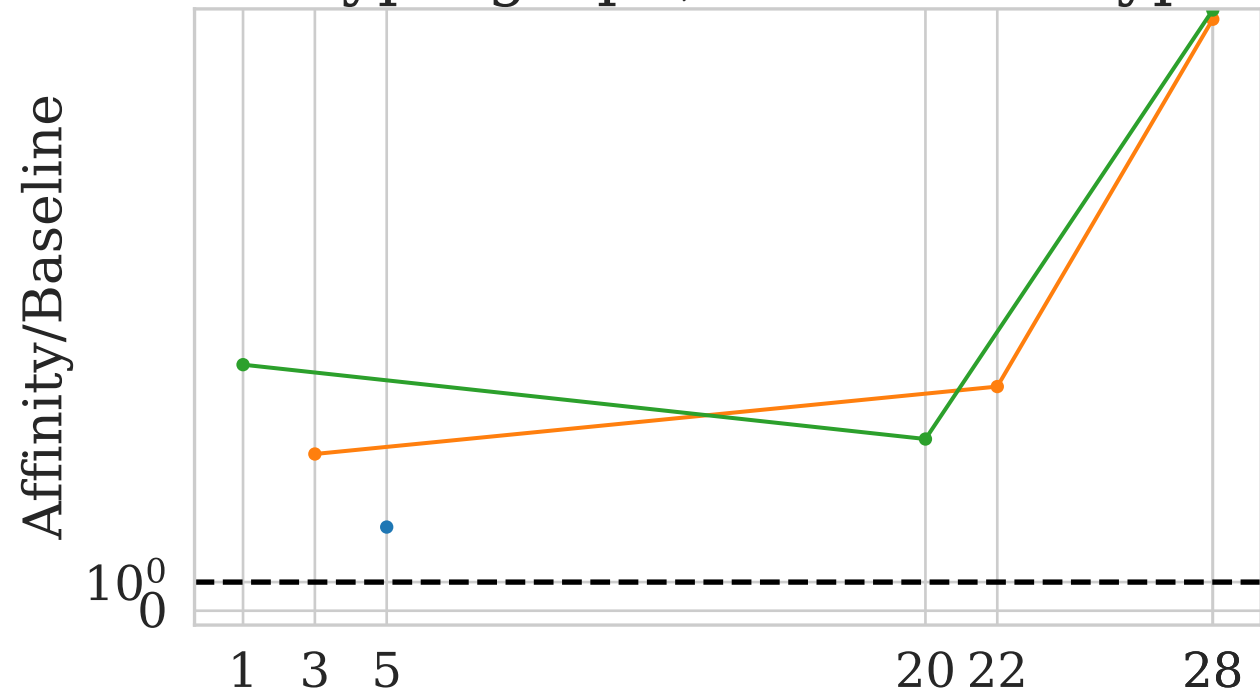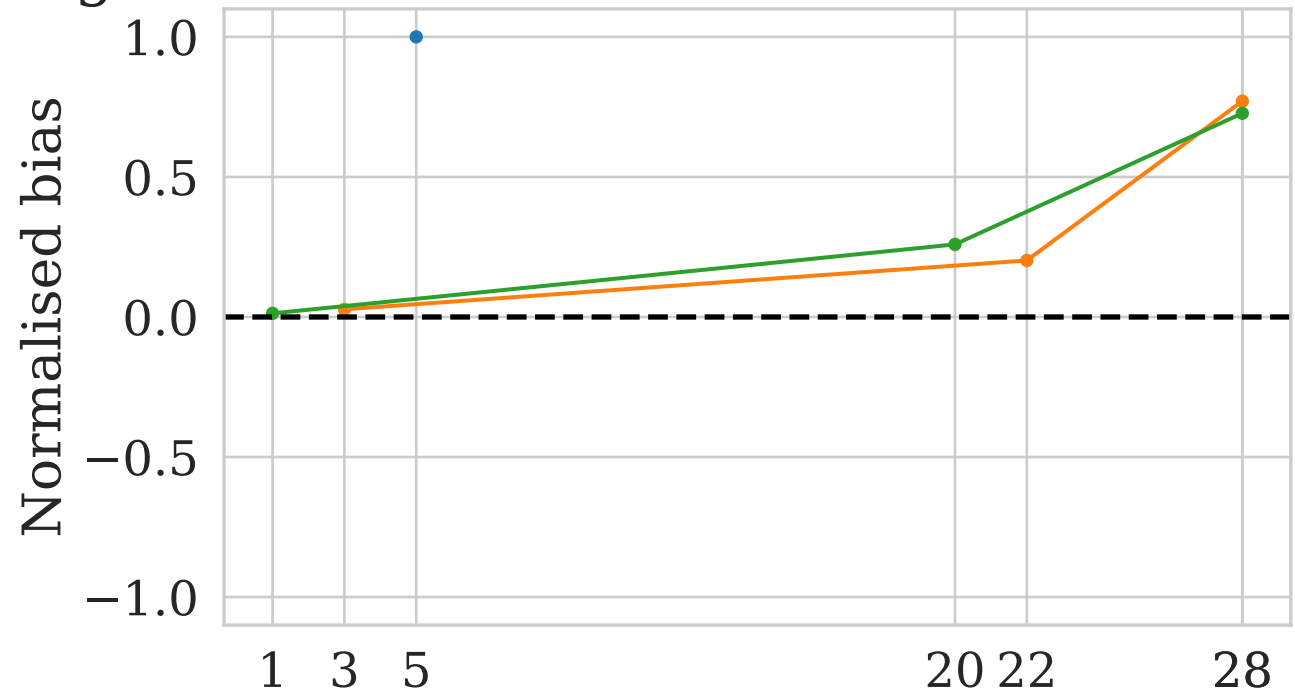

Class 0 Class 1 Class 2



20-uniform hypergraph, number of hyperedges: 7

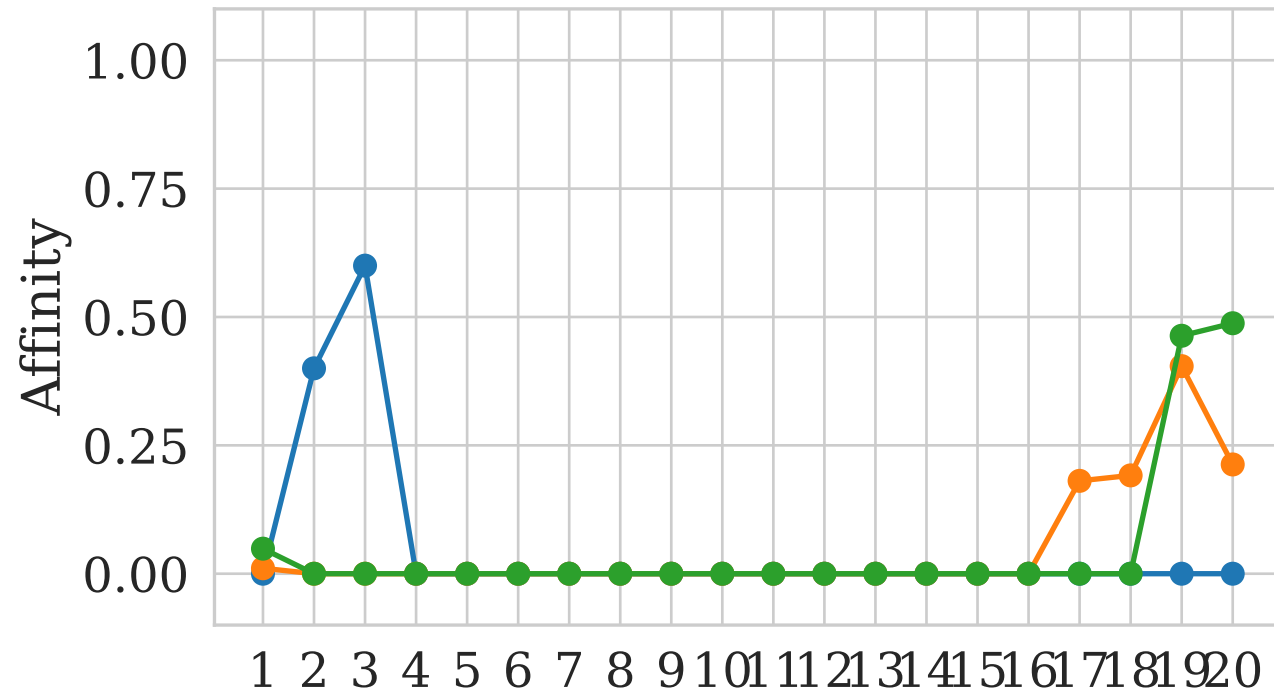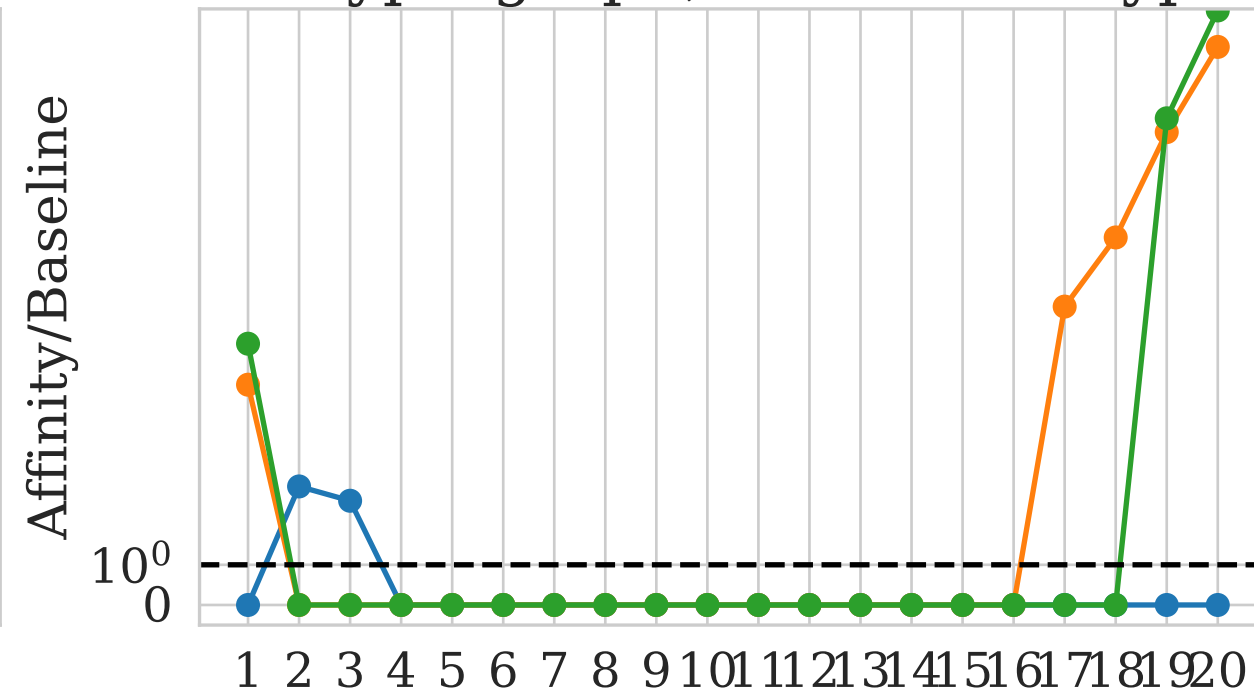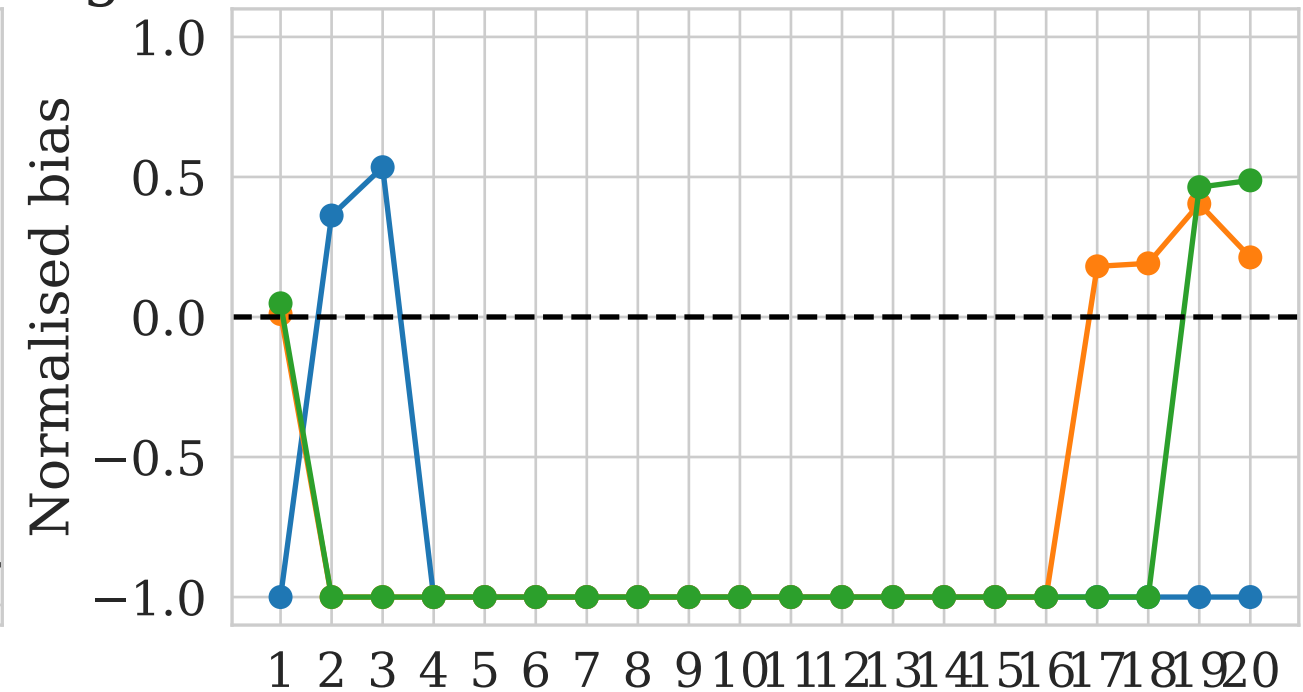

Class 0 Class 1 Class 2

29-uniform hypergraph, number of hyperedges: 7

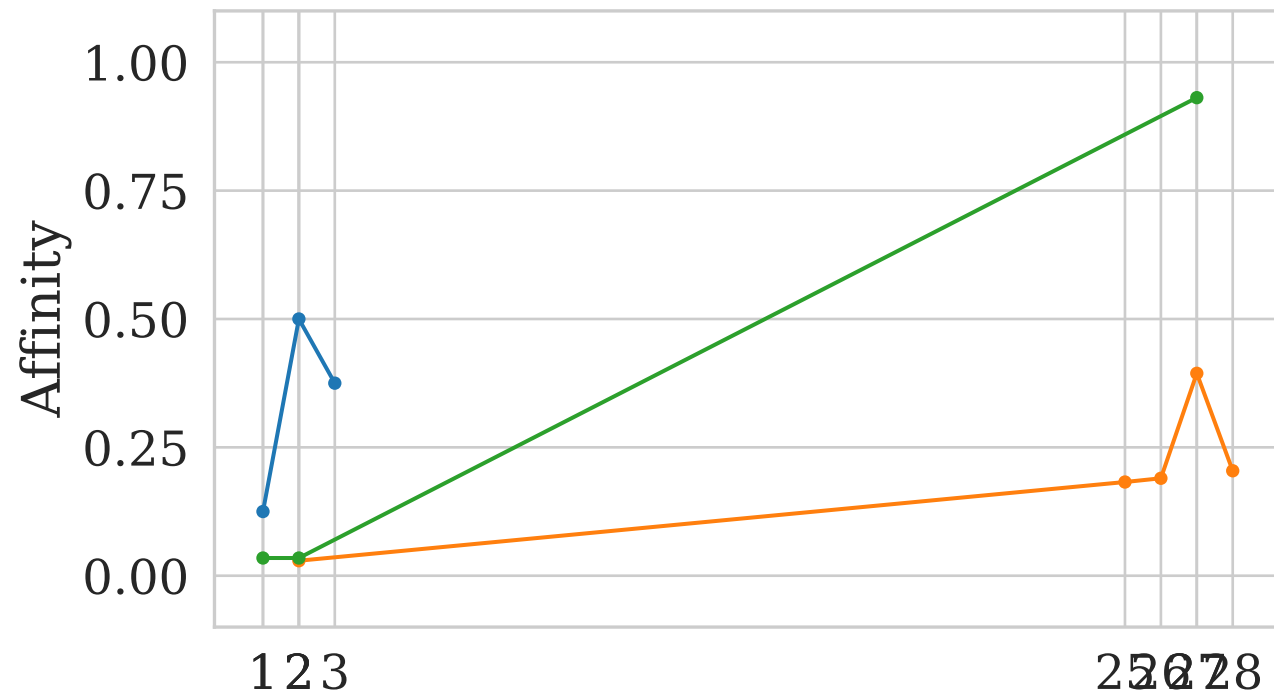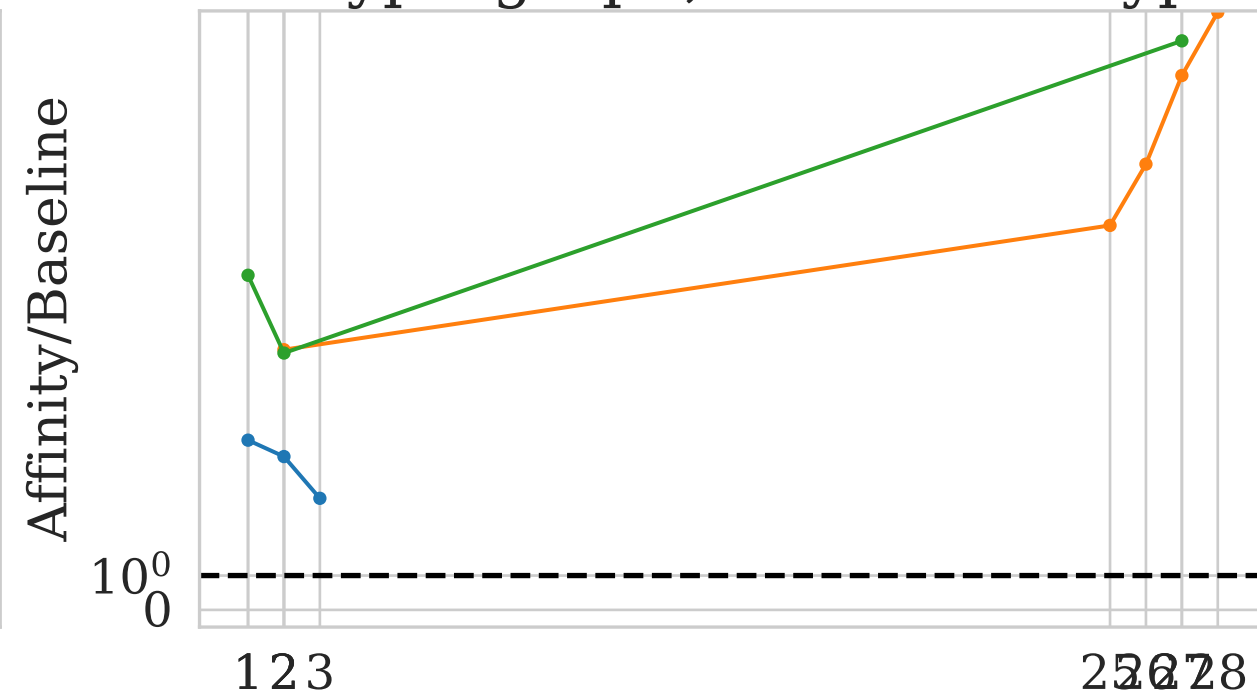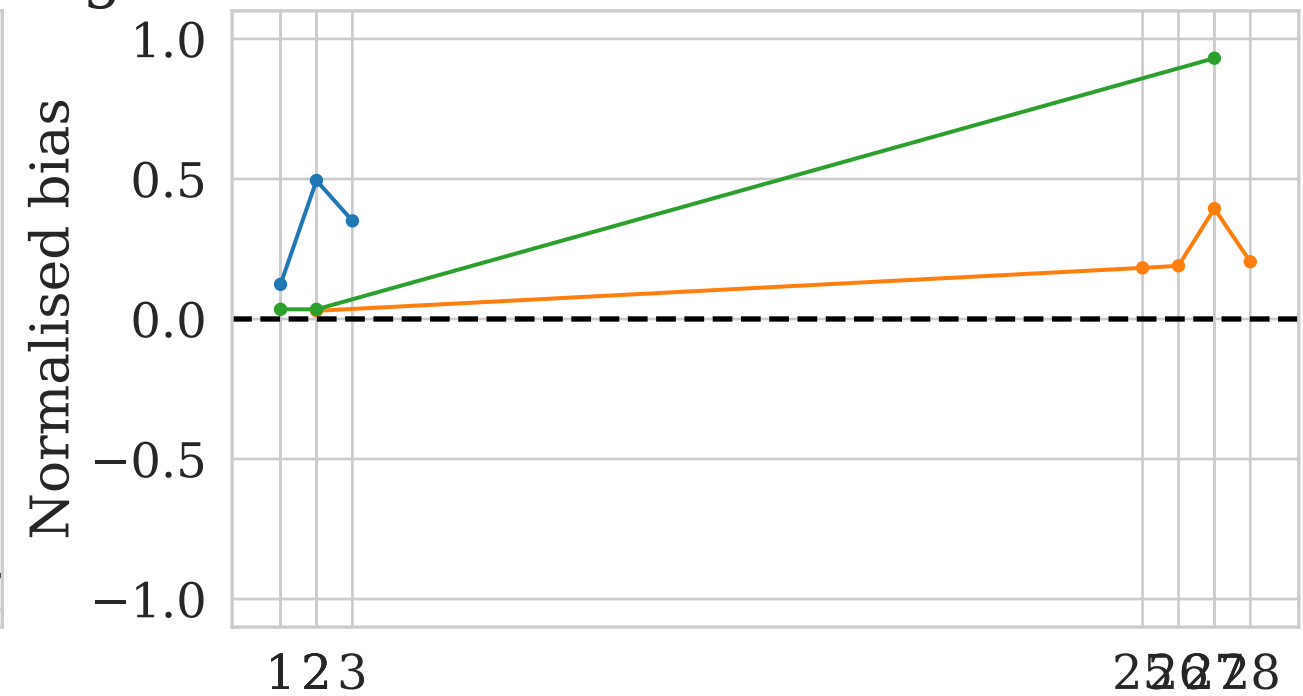

Class 0 Class 1 Class 2

30-uniform hypergraph, number of hyperedges: 5

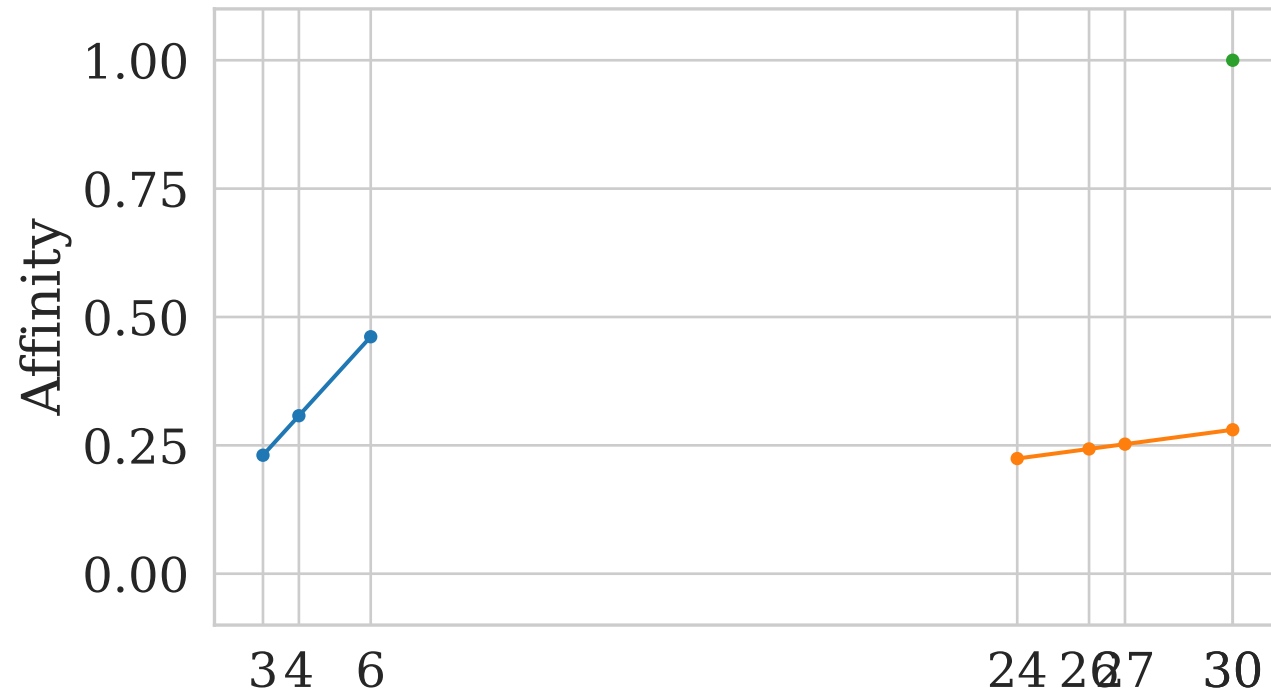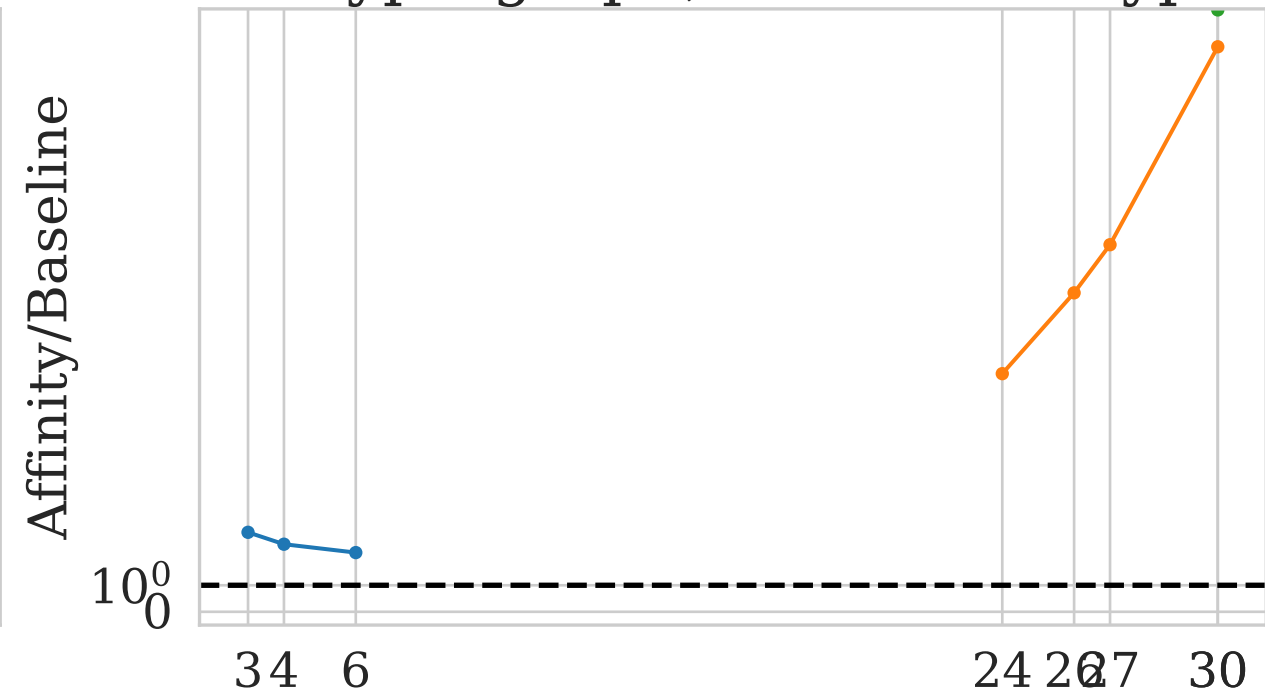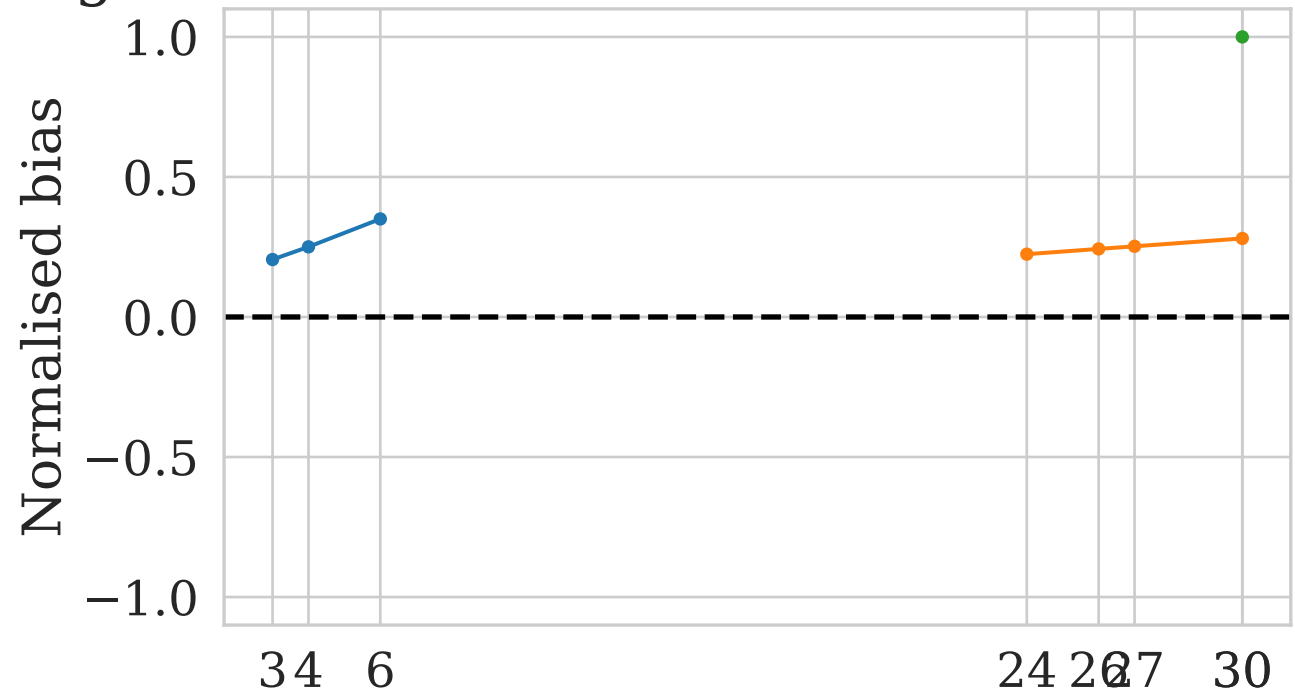

Class 0 Class 1 Class 2

25-uniform hypergraph, number of hyperedges: 5

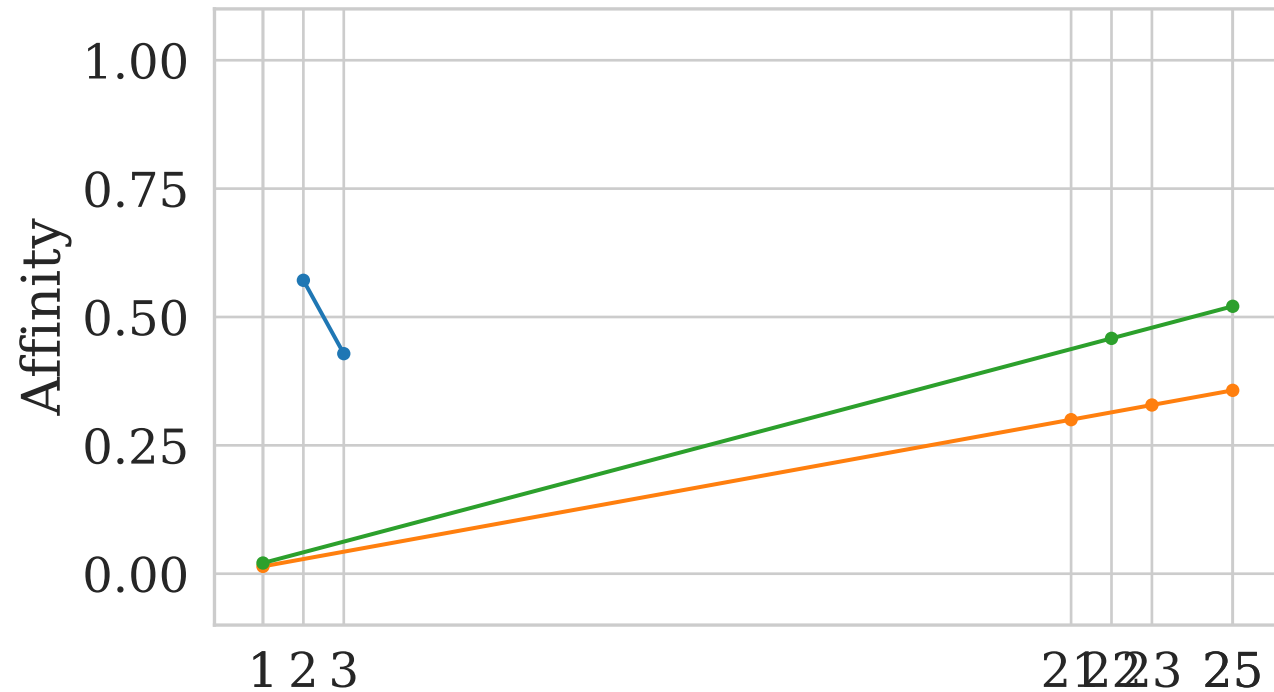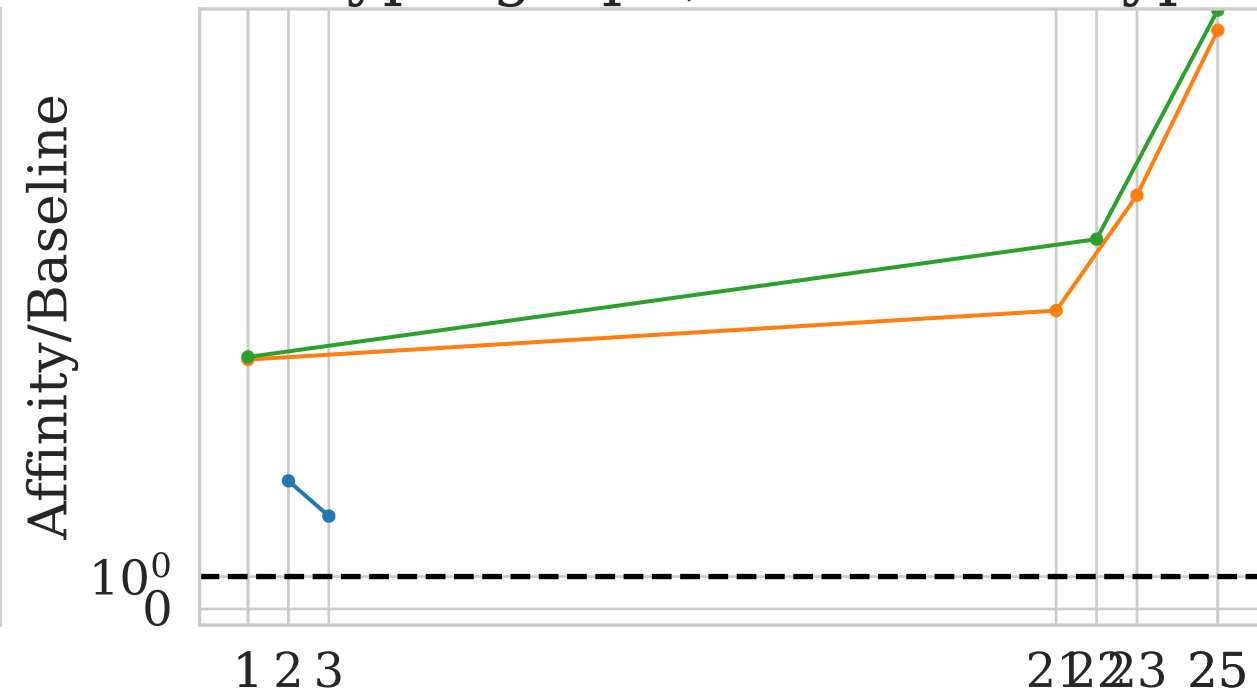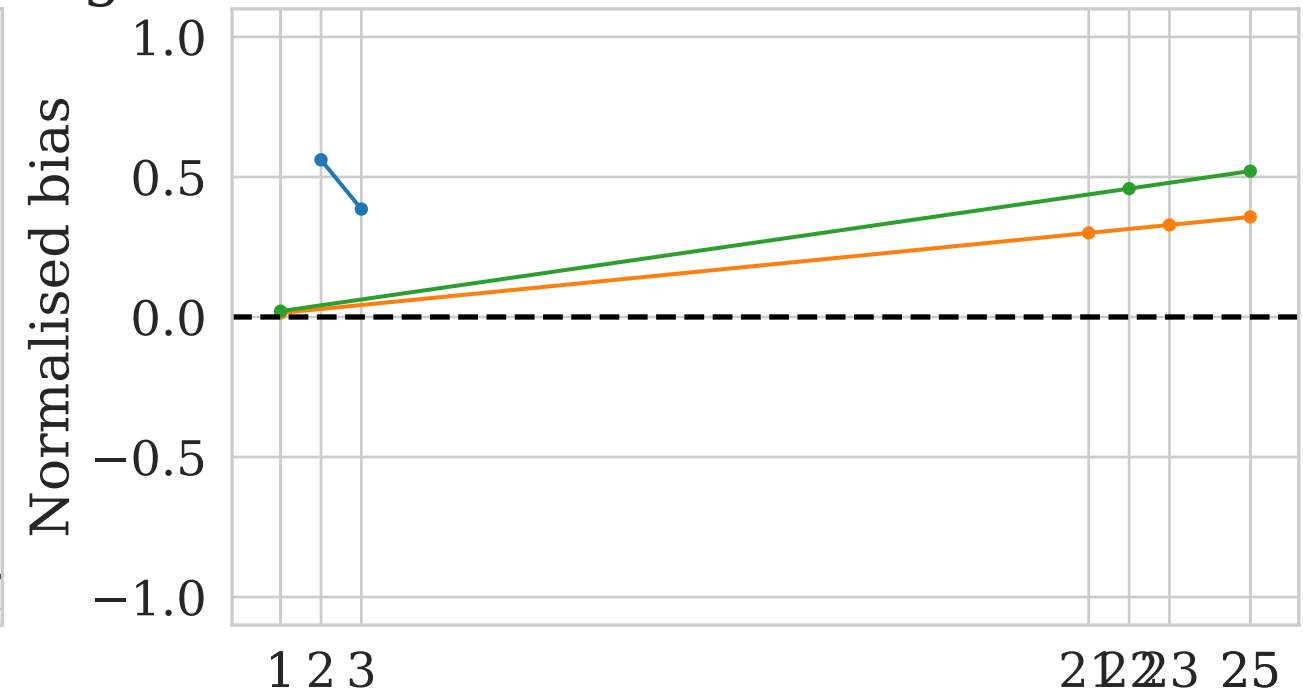

Class 0 Class 1 Class 2

37-uniform hypergraph, number of hyperedges: 4

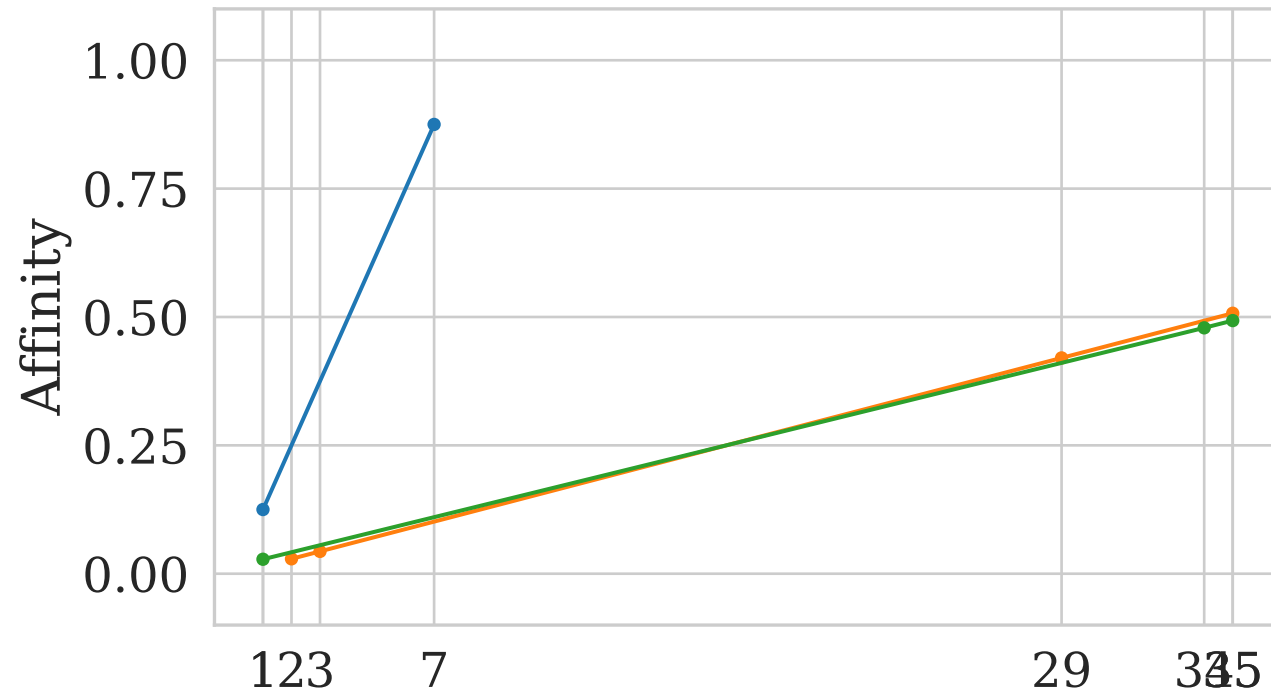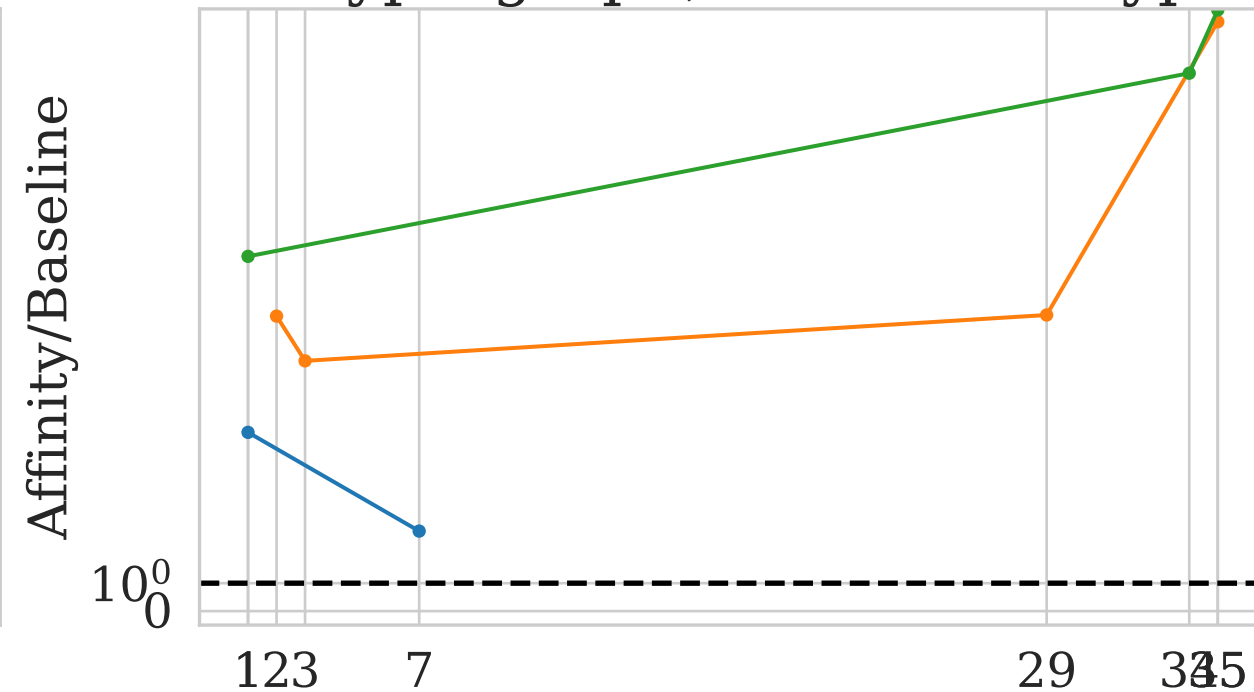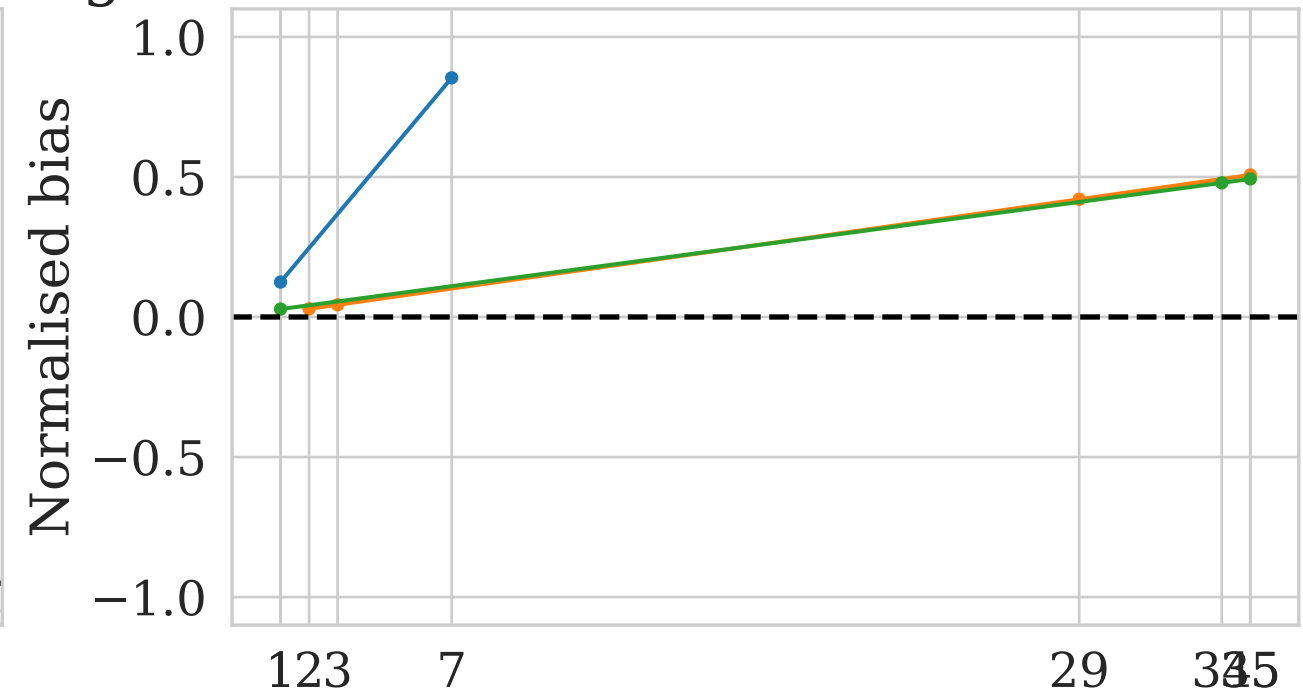

Class 0 Class 1 Class 2

27-uniform hypergraph, number of hyperedges: 3

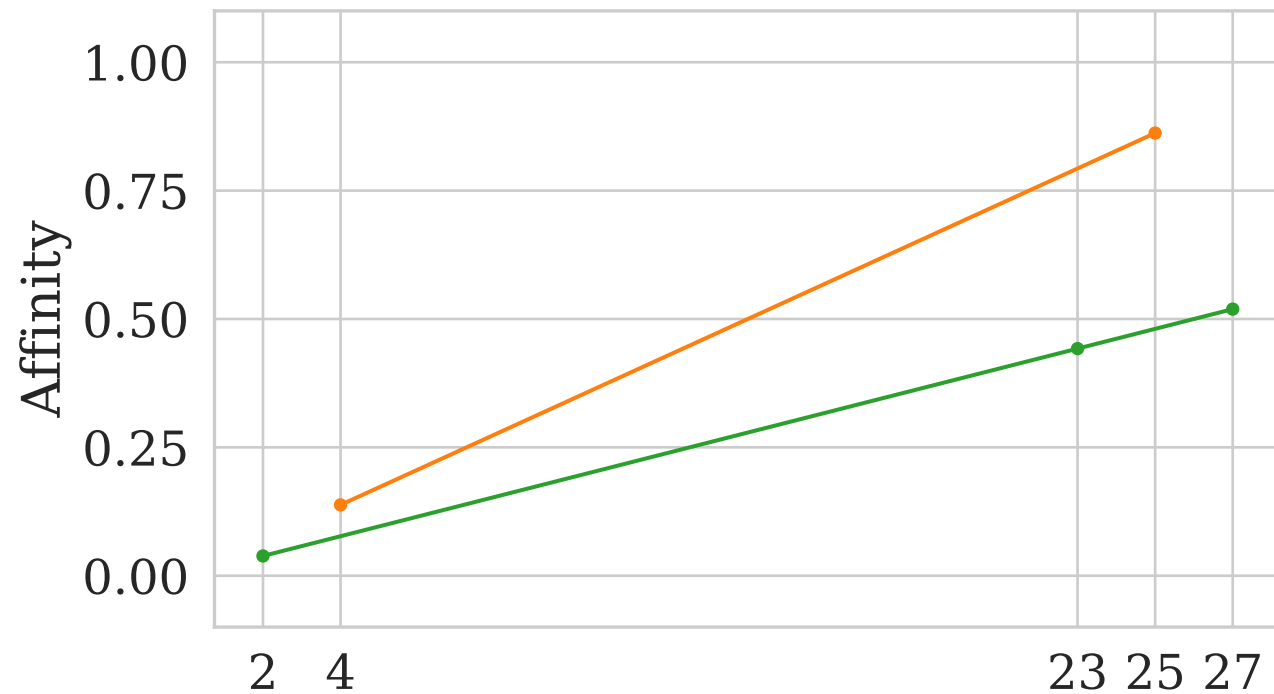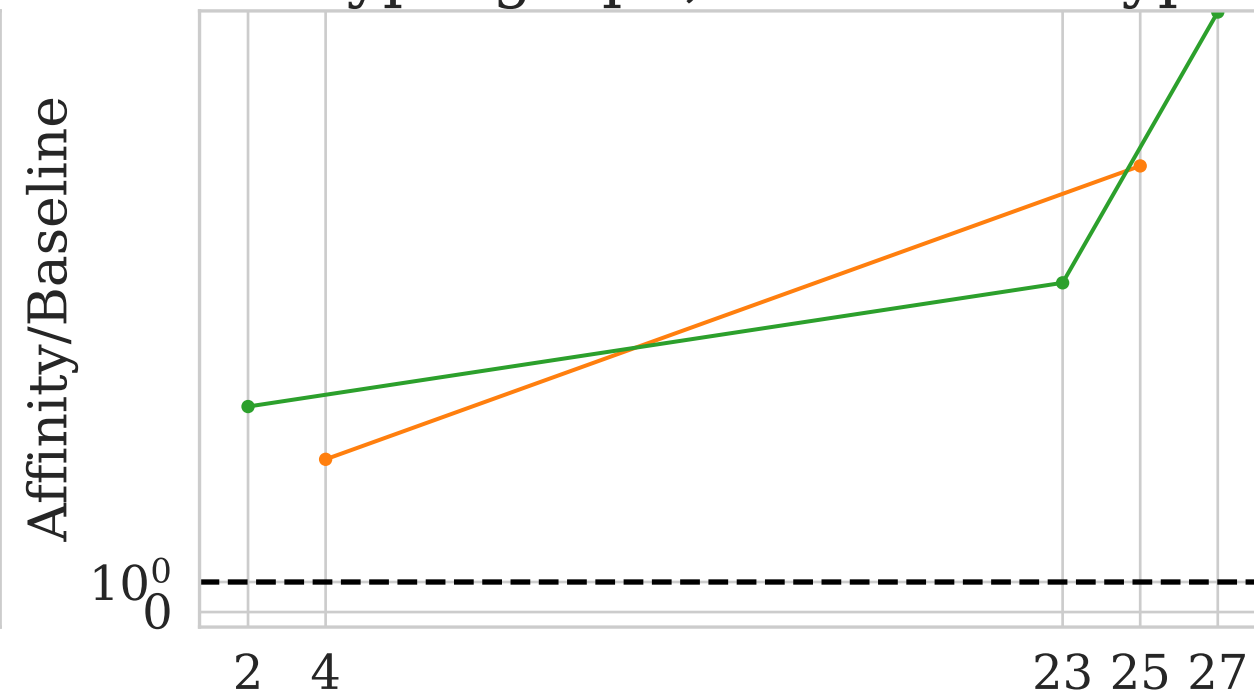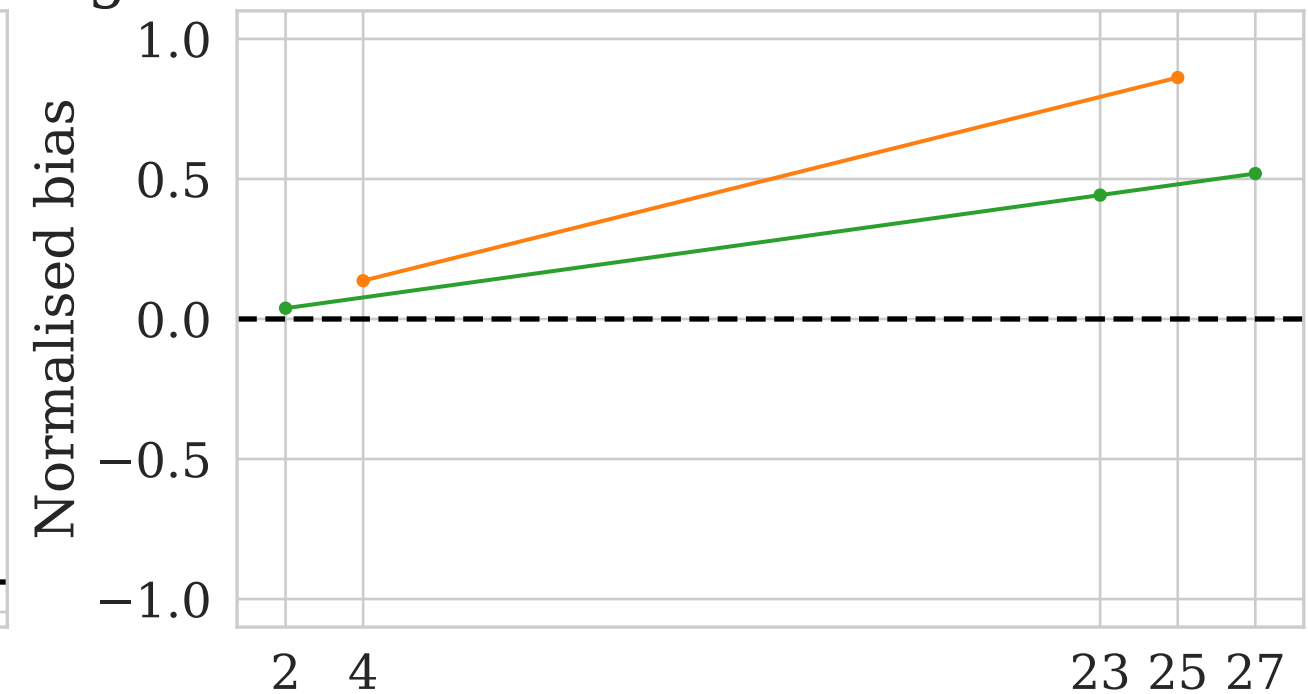

Class 0 Class 1 Class 2

35-uniform hypergraph, number of hyperedges: 3

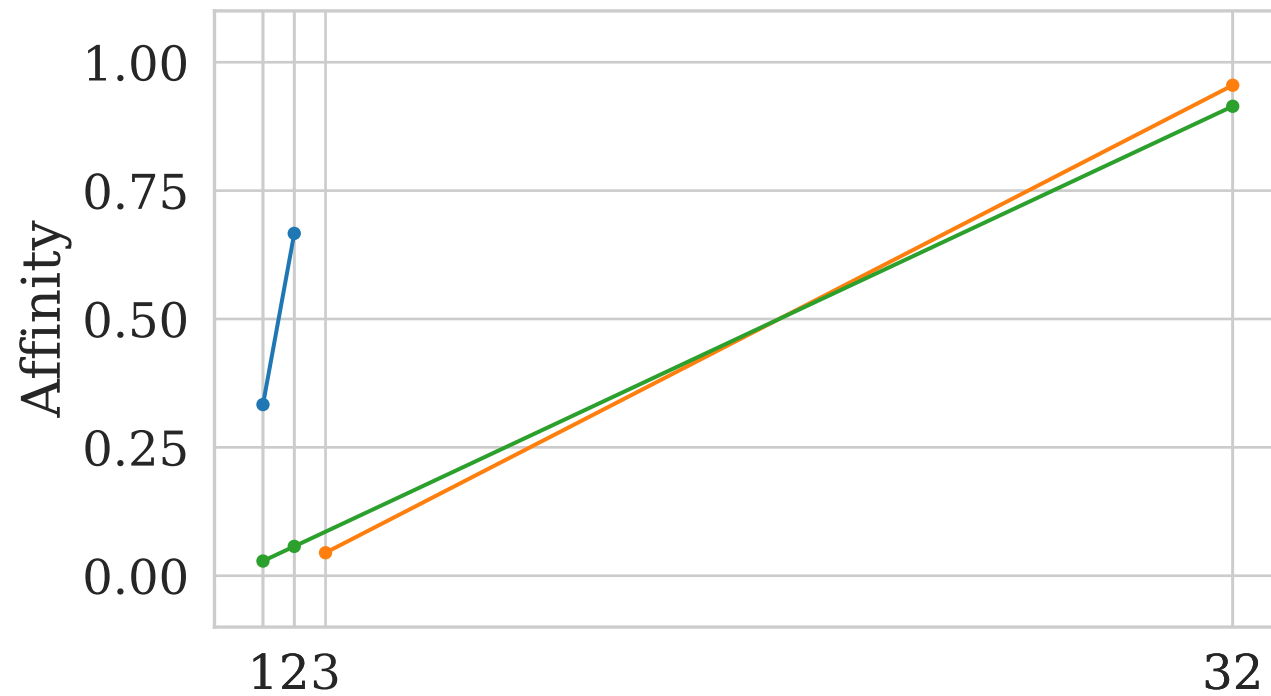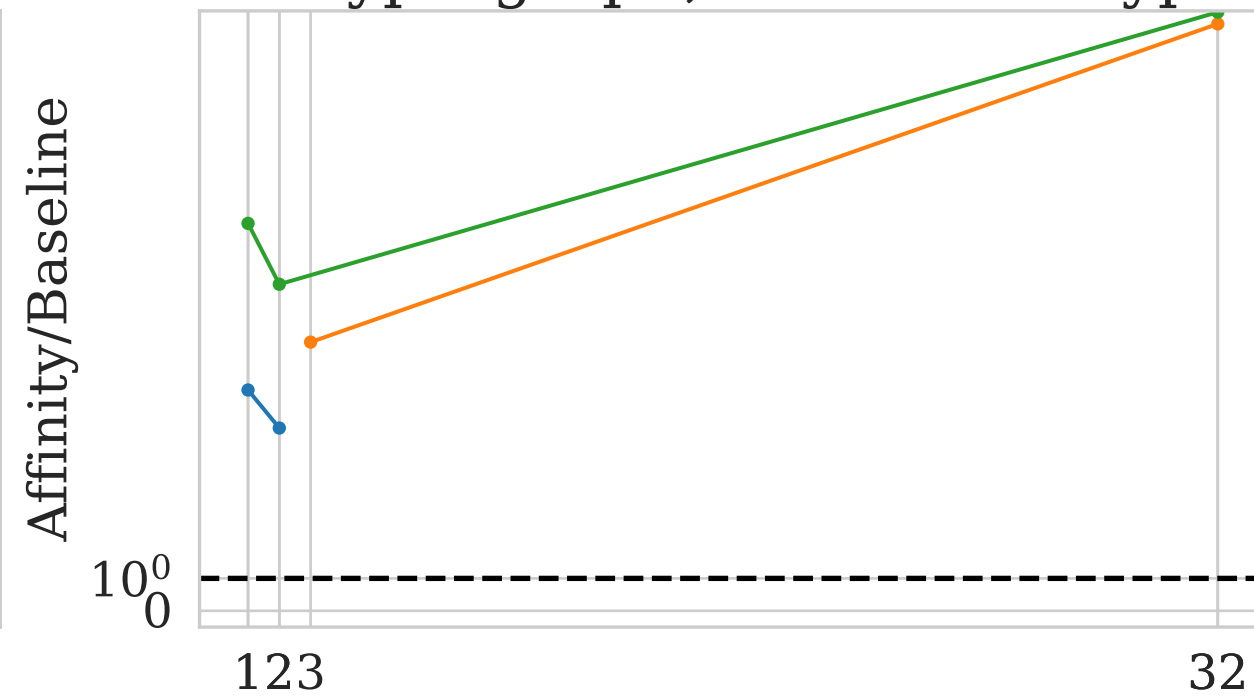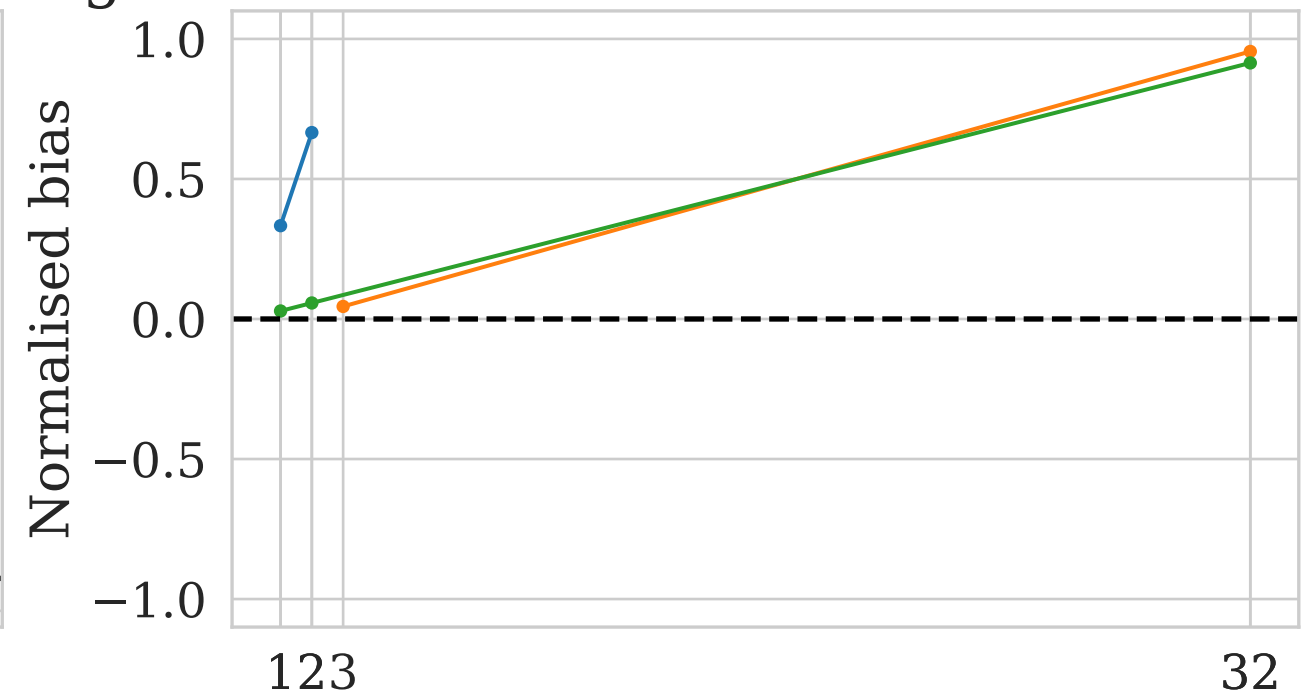

Class 0 Class 1 Class 2

42-uniform hypergraph, number of hyperedges: 3

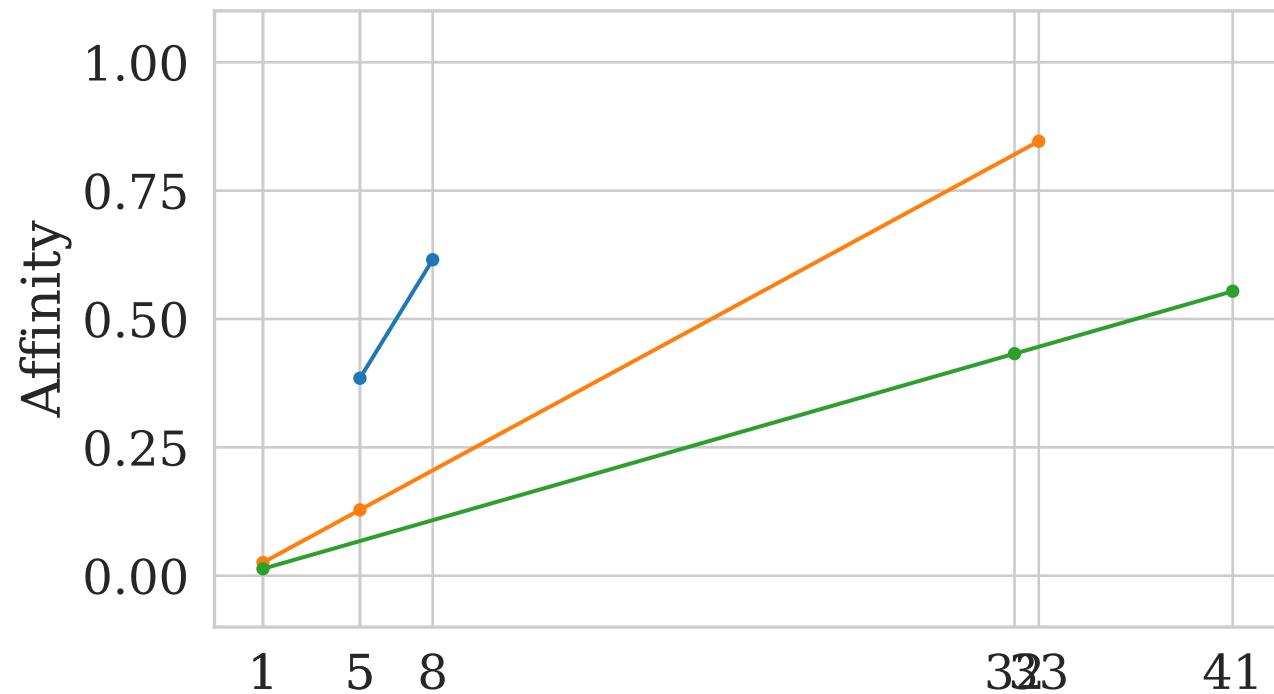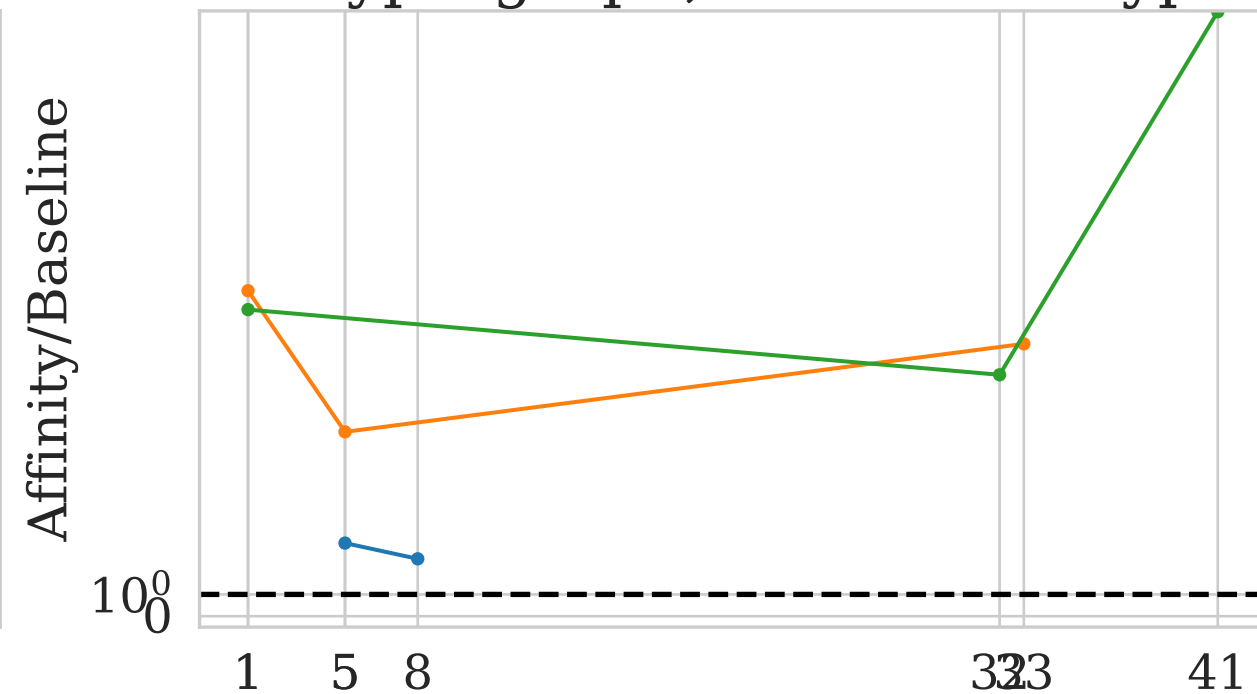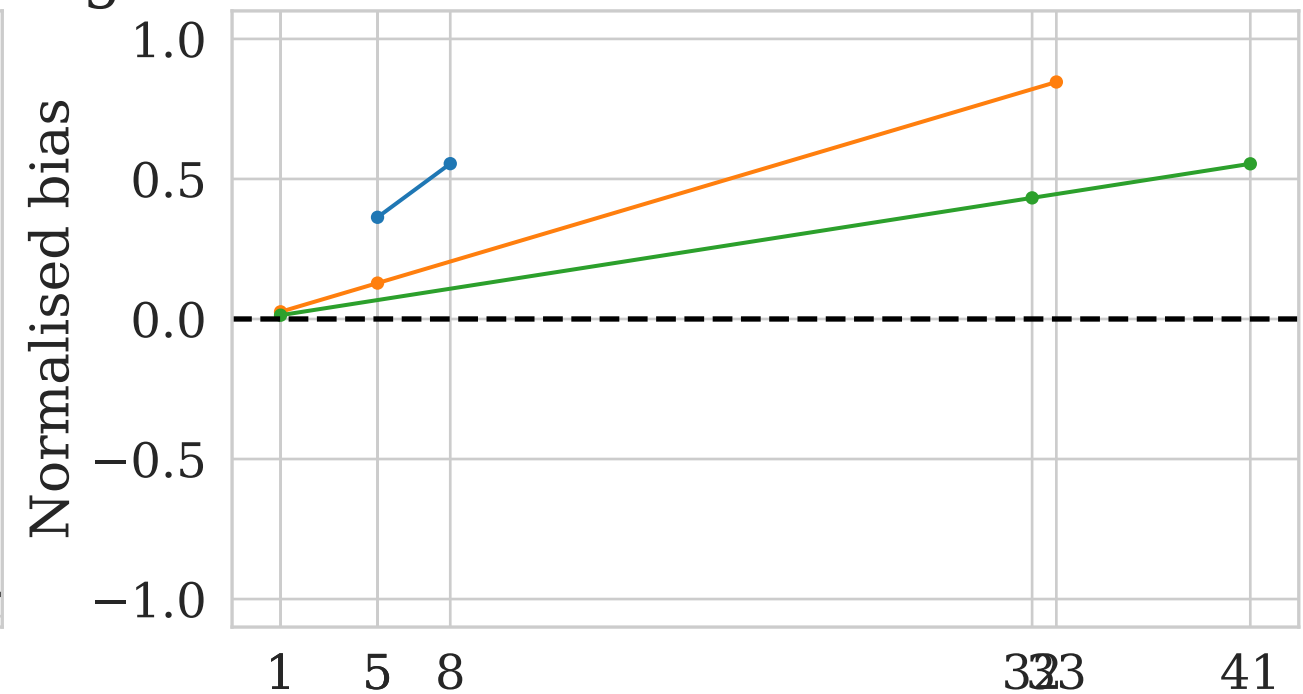

Class 0 Class 1 Class 2



58-uniform hypergraph, number of hyperedges: 2

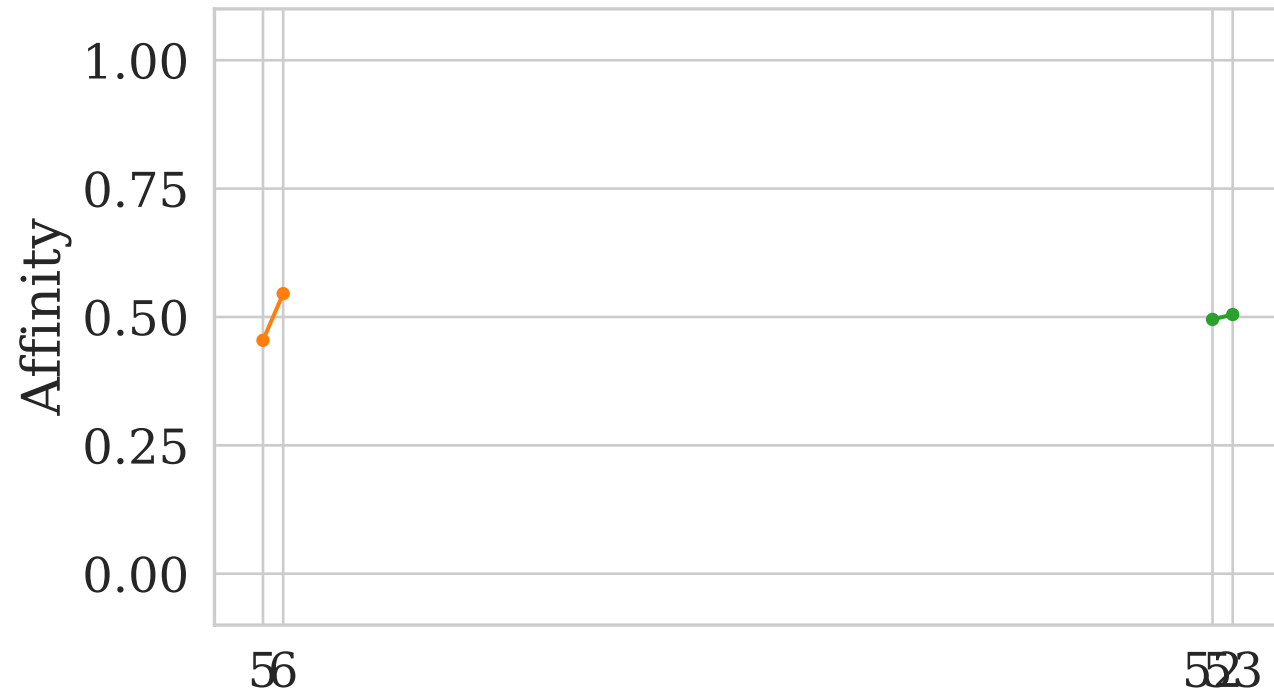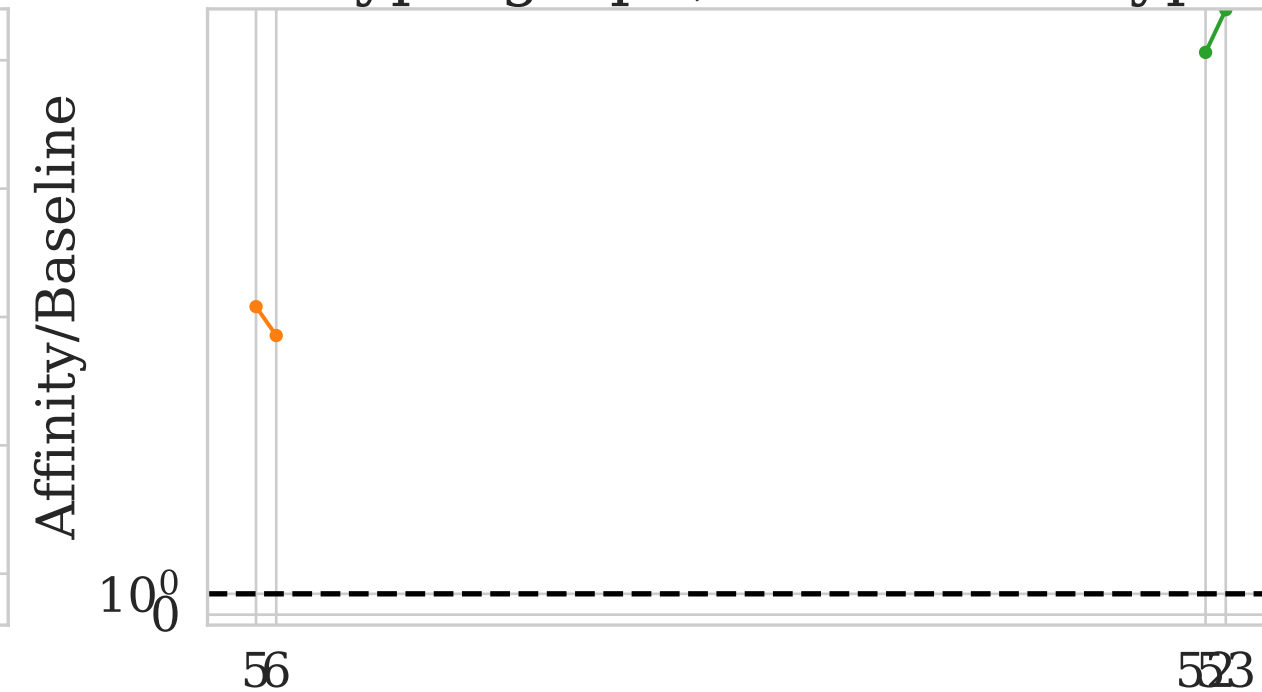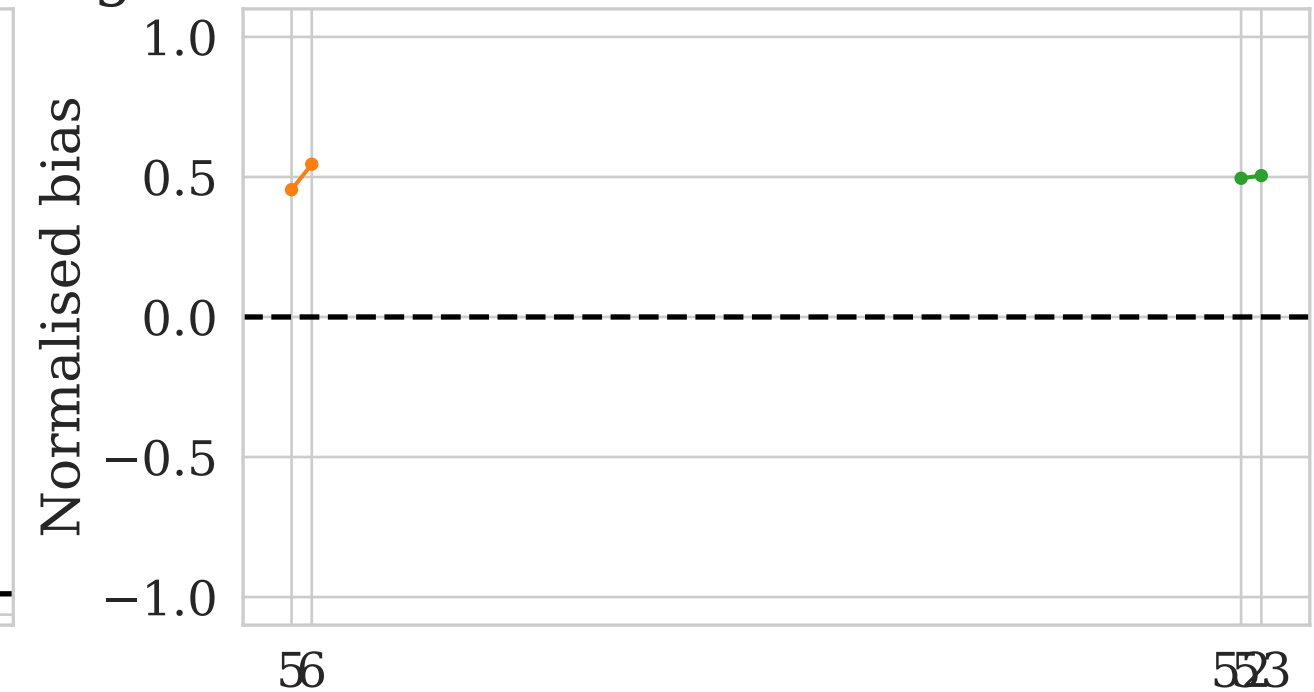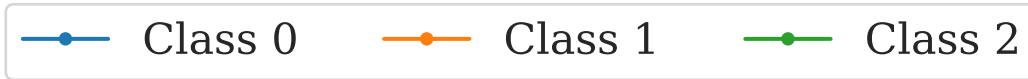

31-uniform hypergraph, number of hyperedges: 2

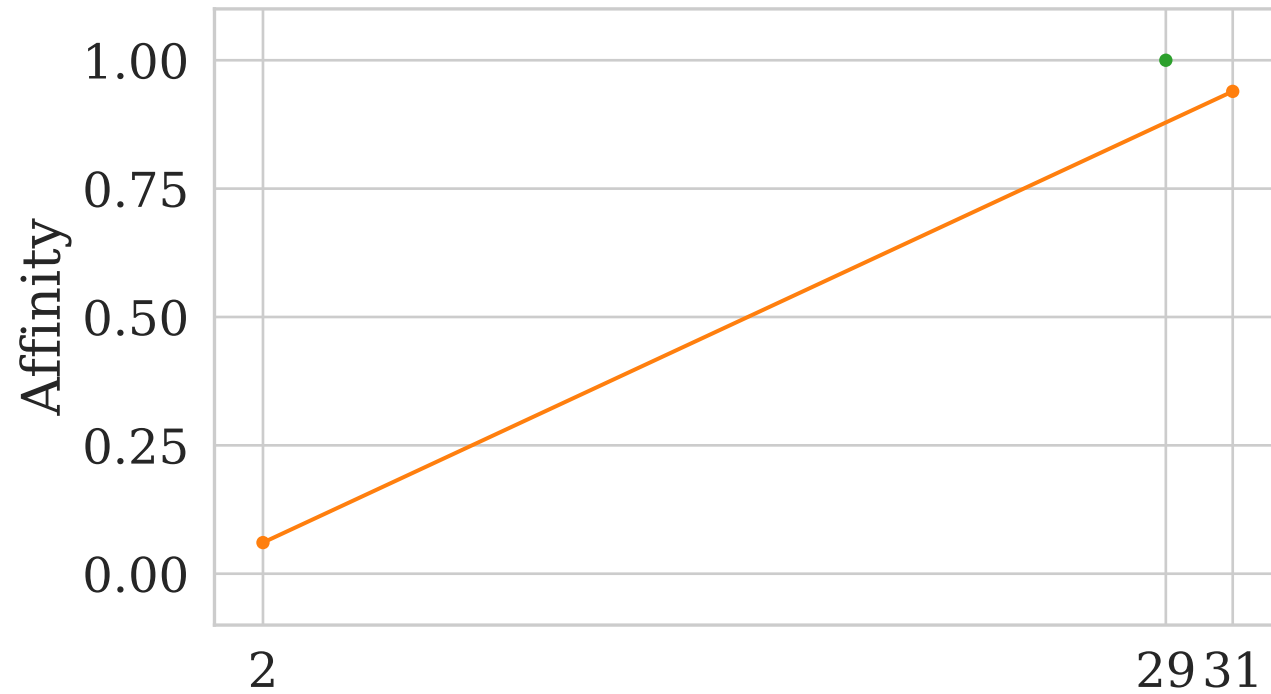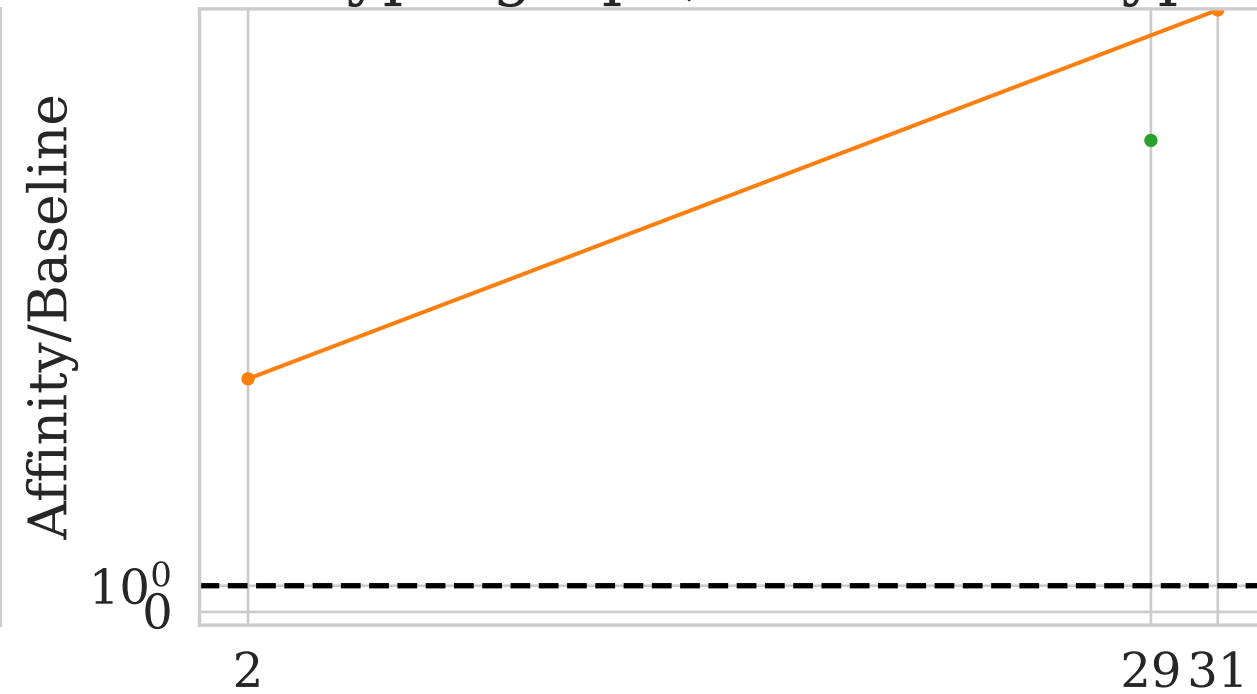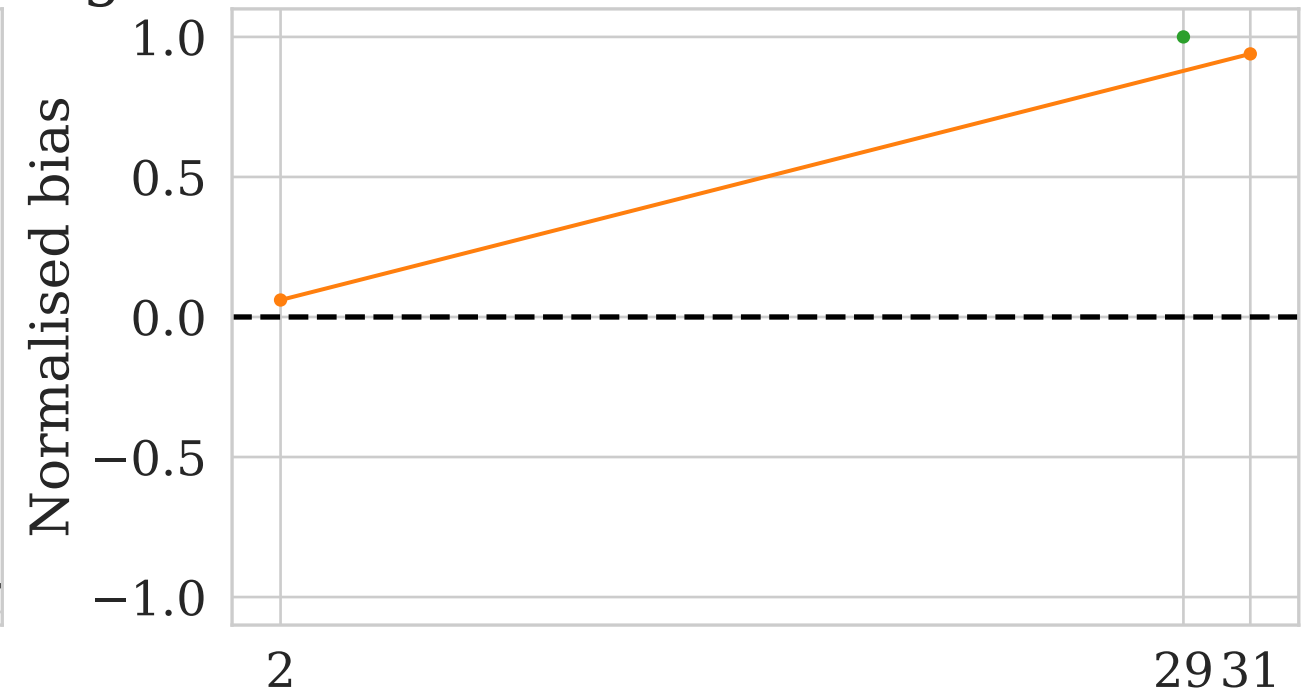

Class 0 Class 1 Class 2

51-uniform hypergraph, number of hyperedges: 2

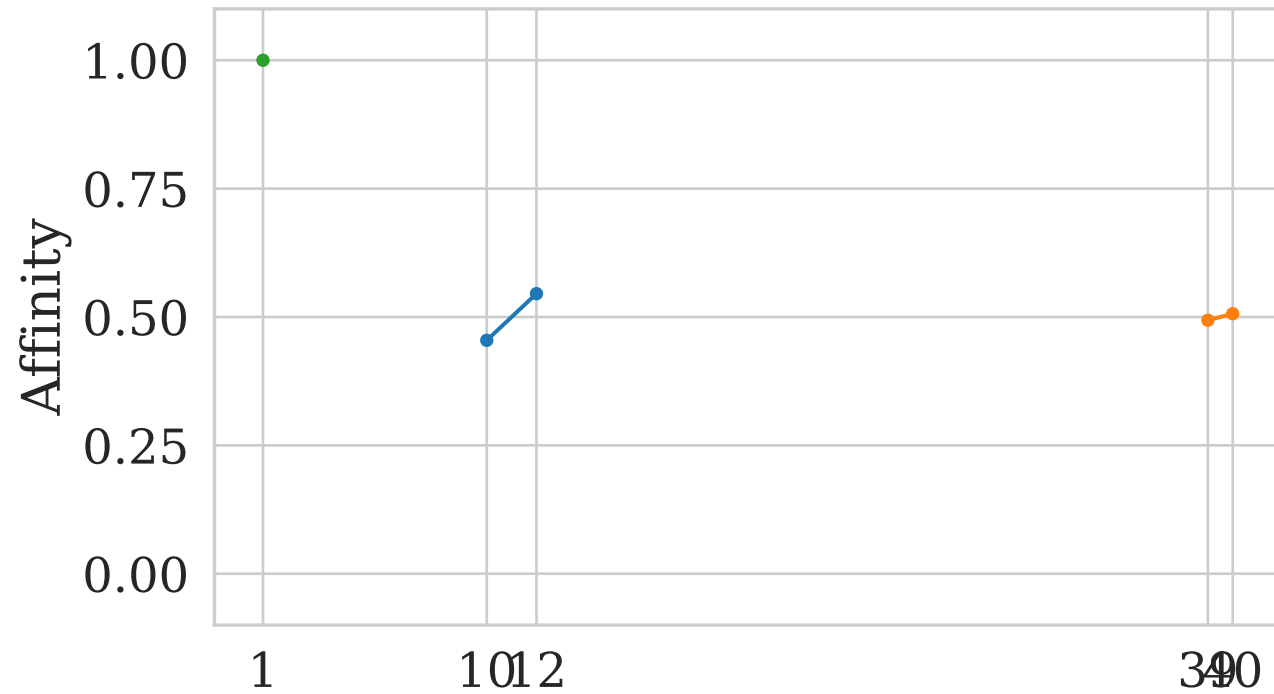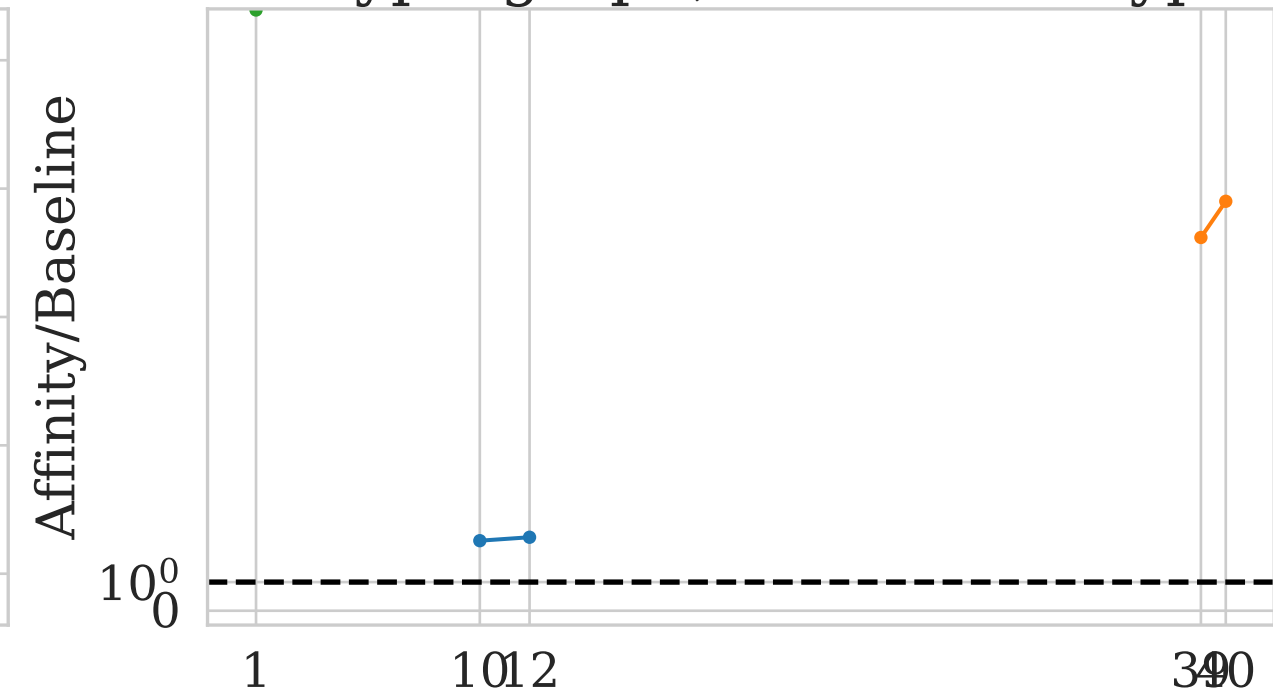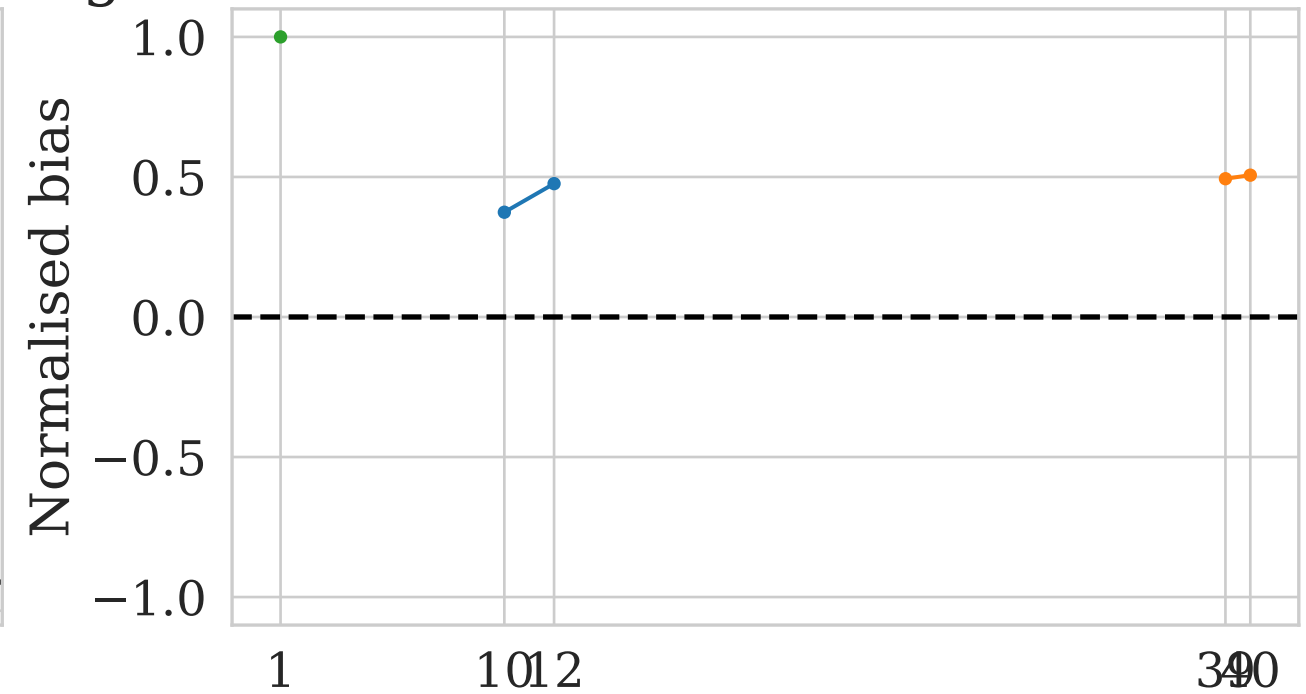

Class 0 Class 1 Class 2

36-uniform hypergraph, number of hyperedges: 2

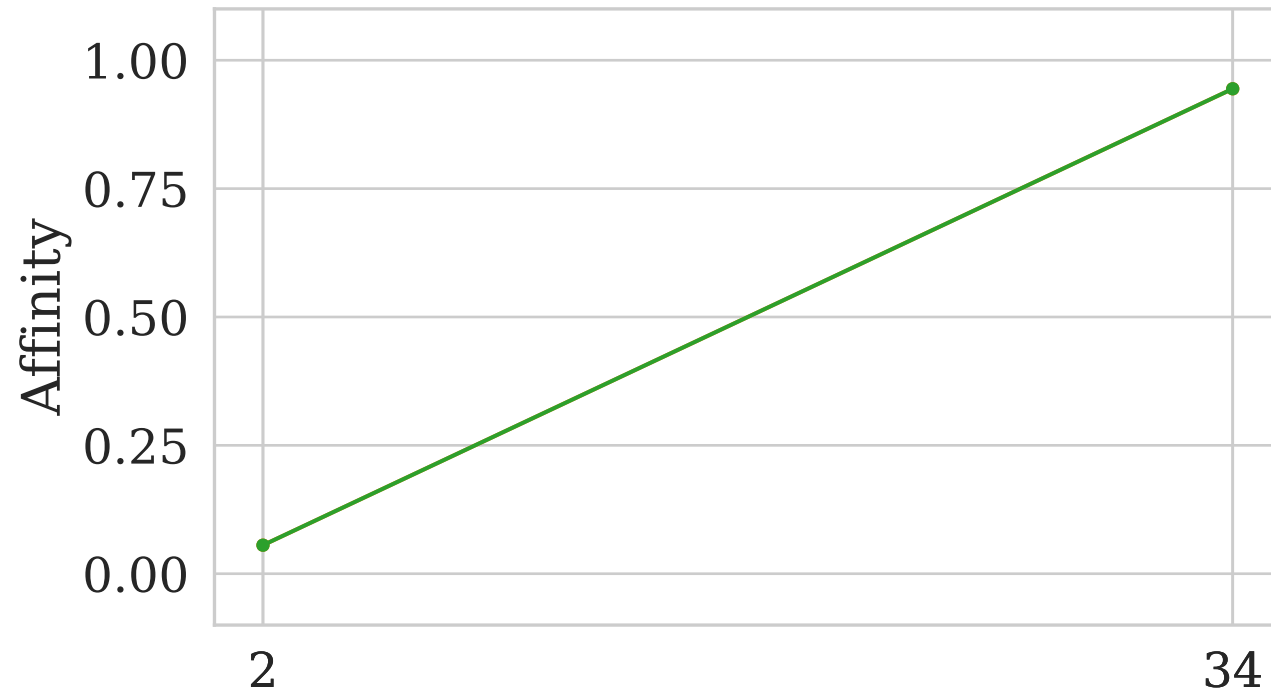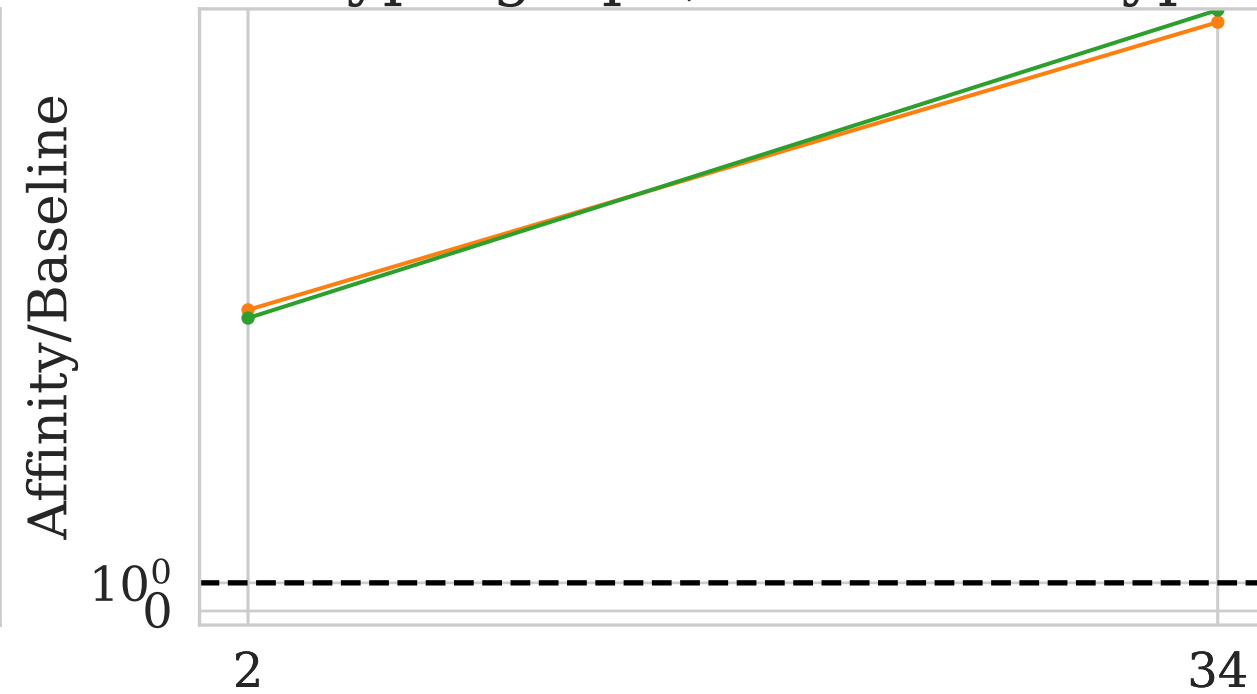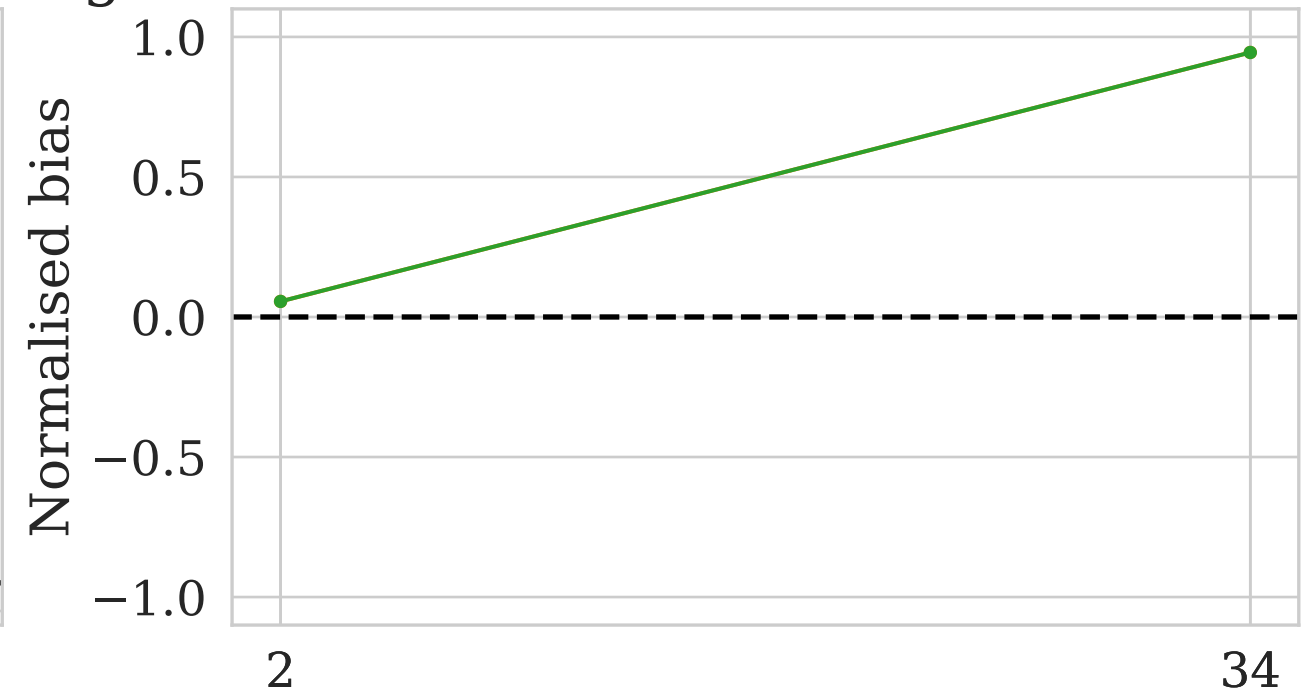

Class 0 Class 1 Class 2

40-uniform hypergraph, number of hyperedges: 2

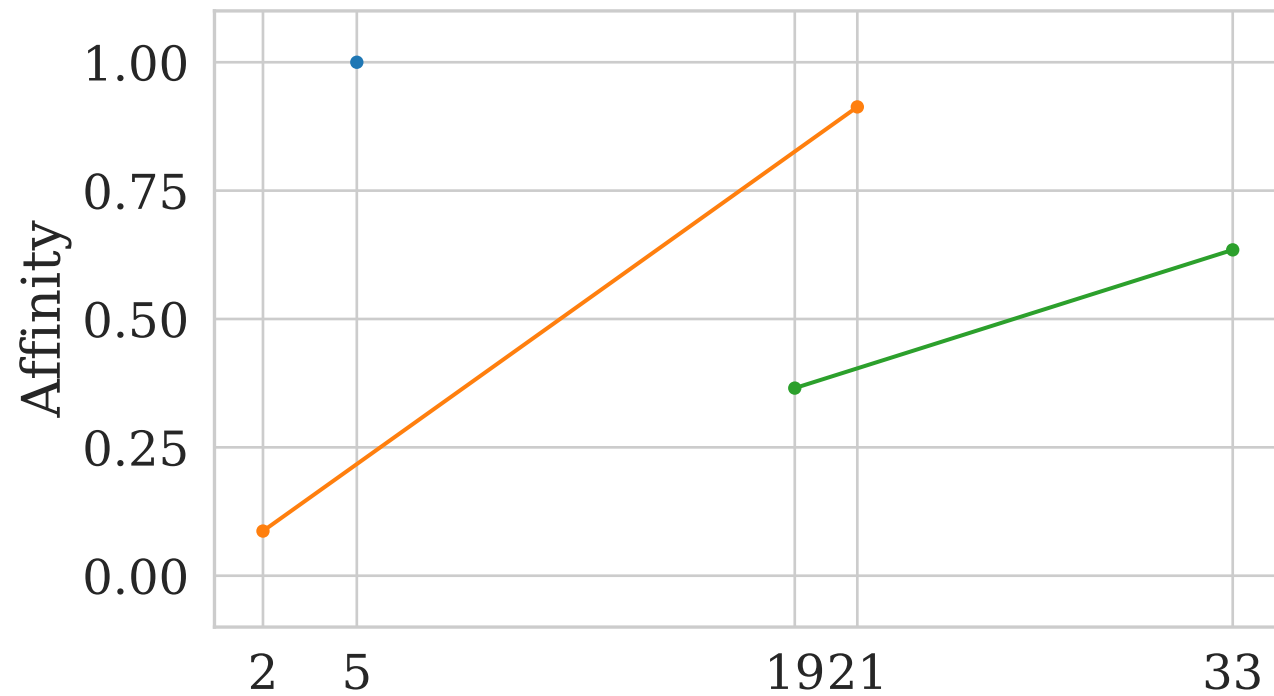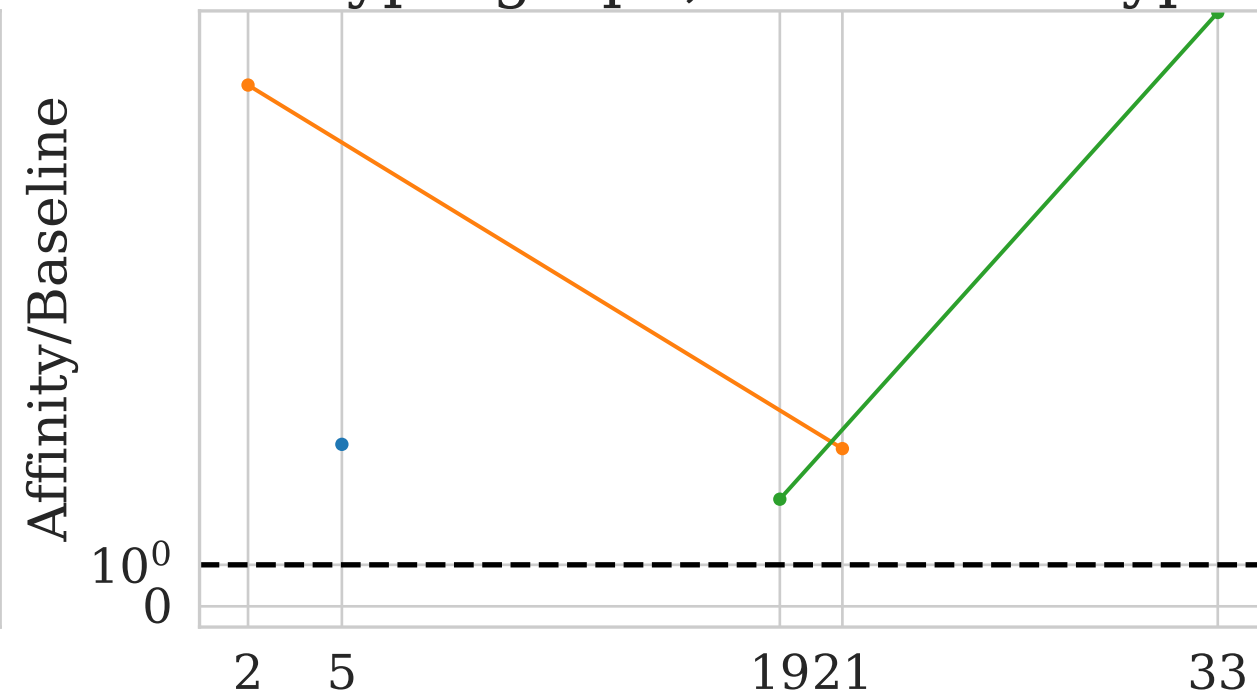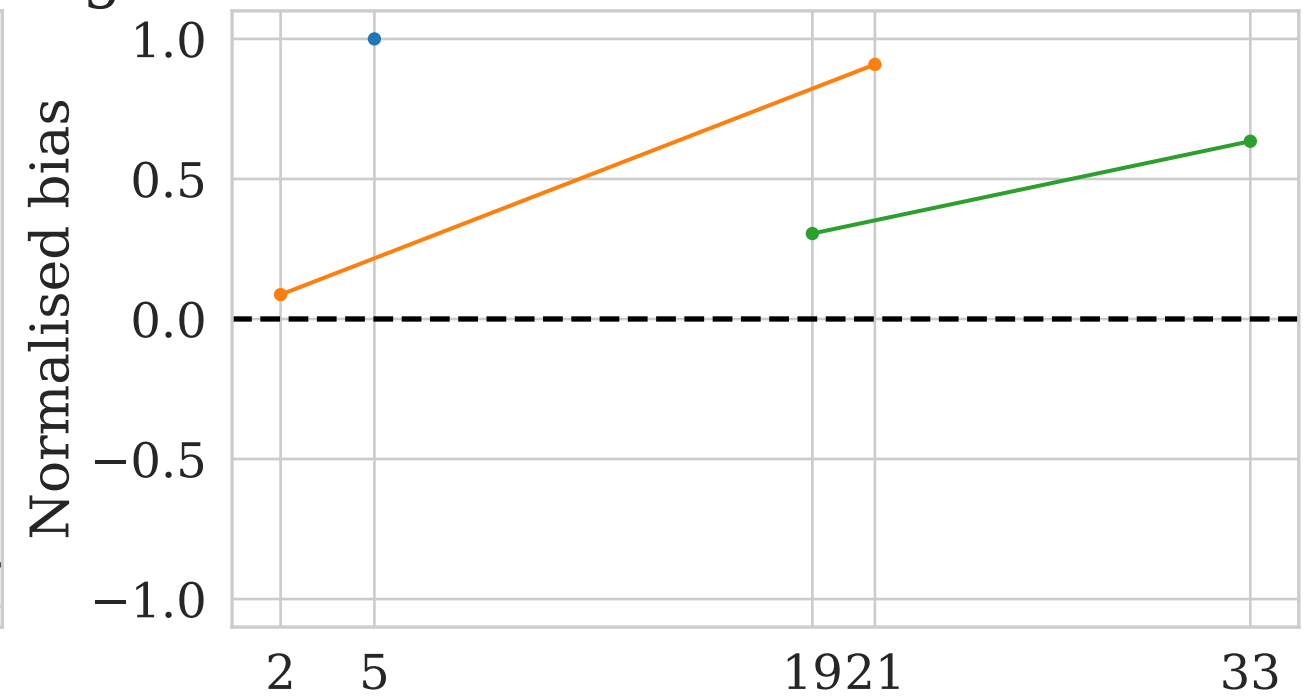

Class 0 Class 1 Class 2

41-uniform hypergraph, number of hyperedges: 2

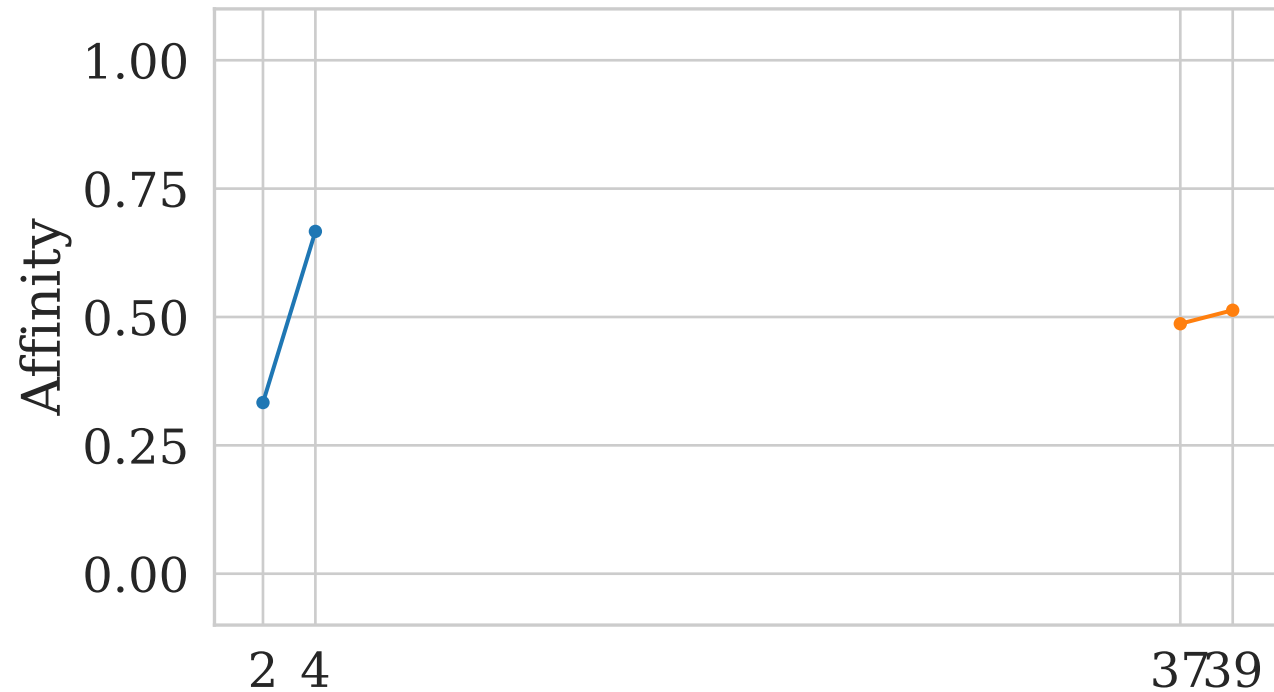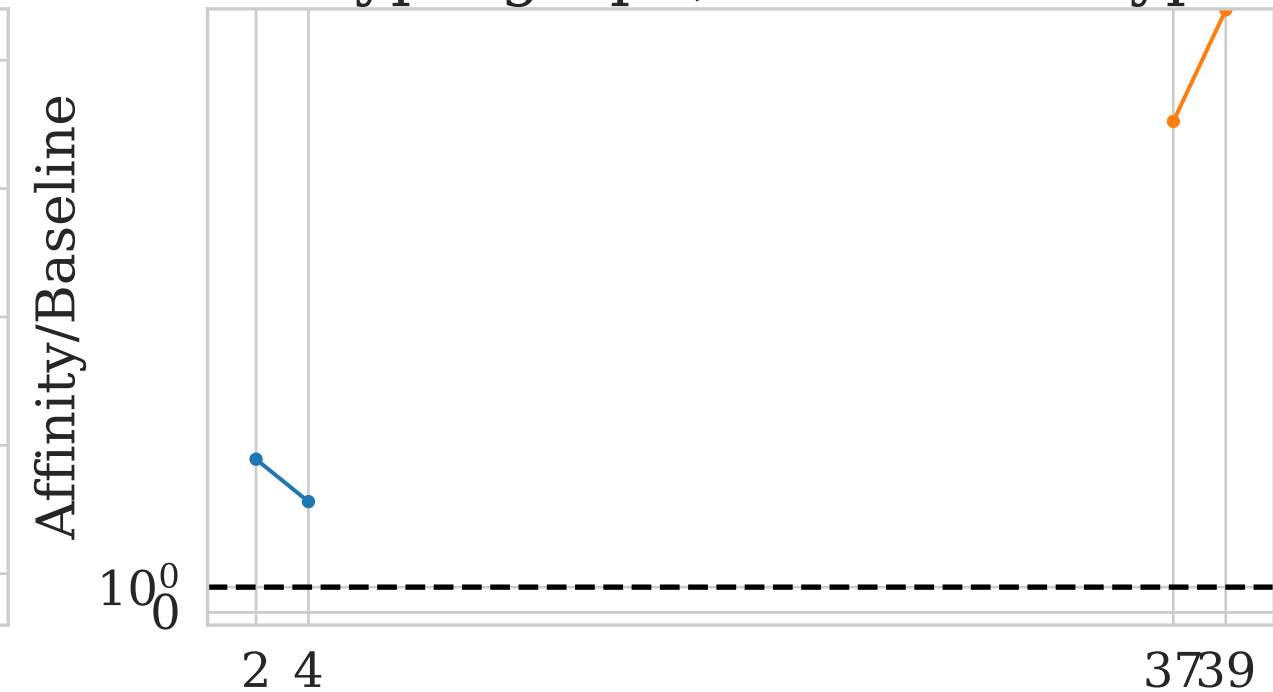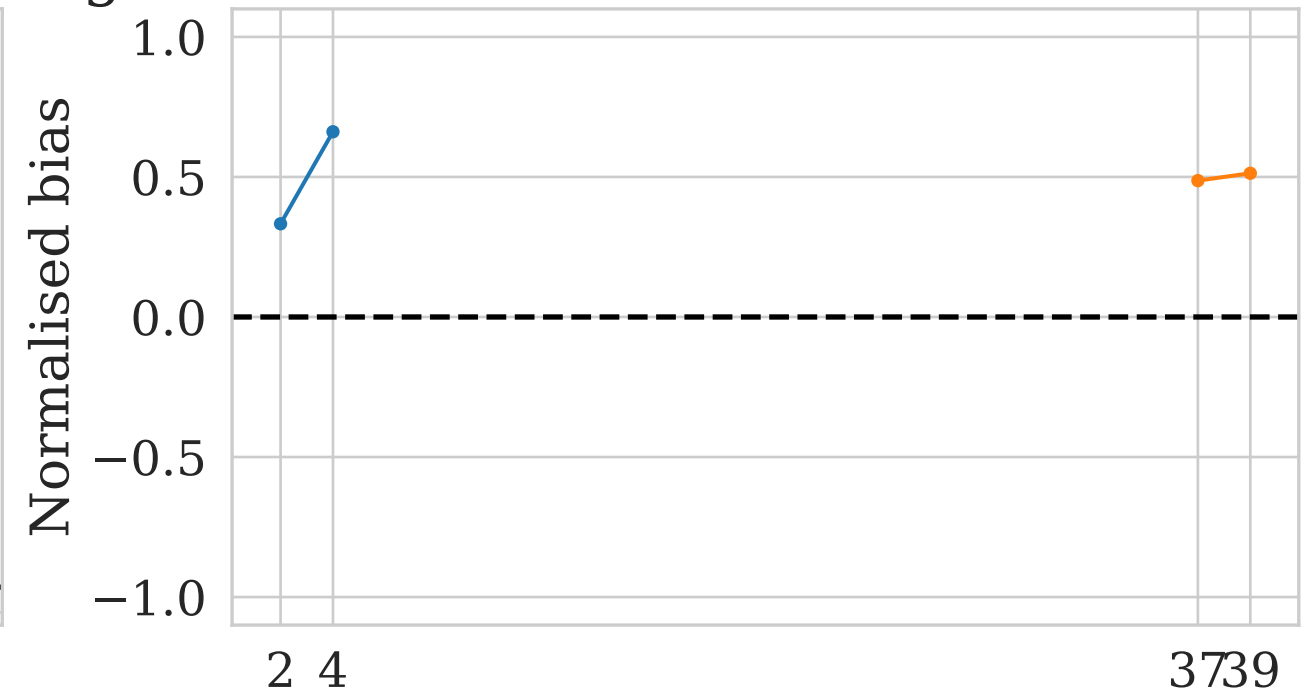

Class 0 Class 1 Class 2

74-uniform hypergraph, number of hyperedges: 2

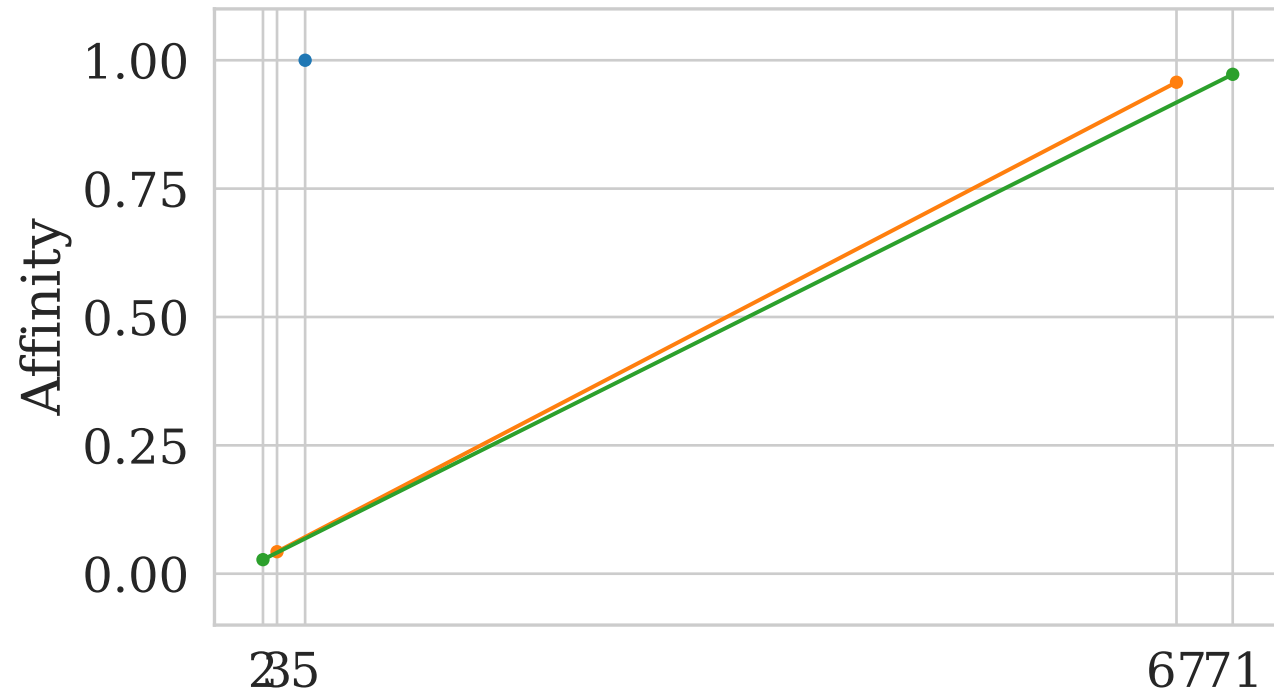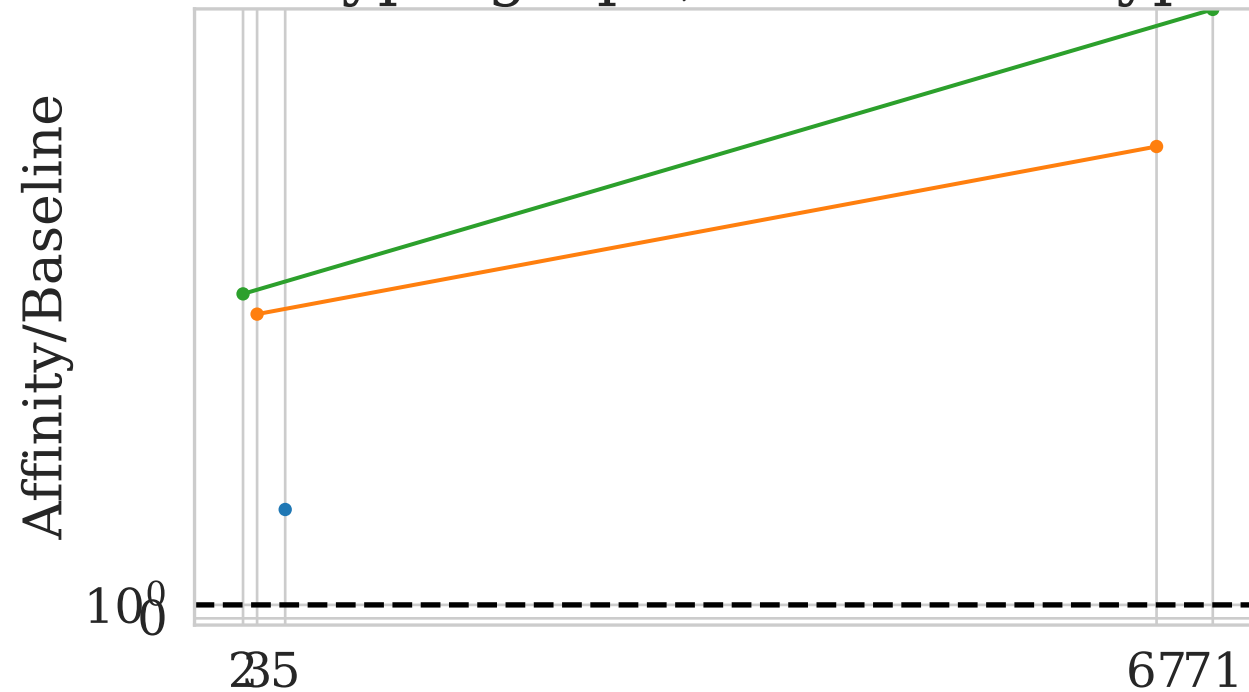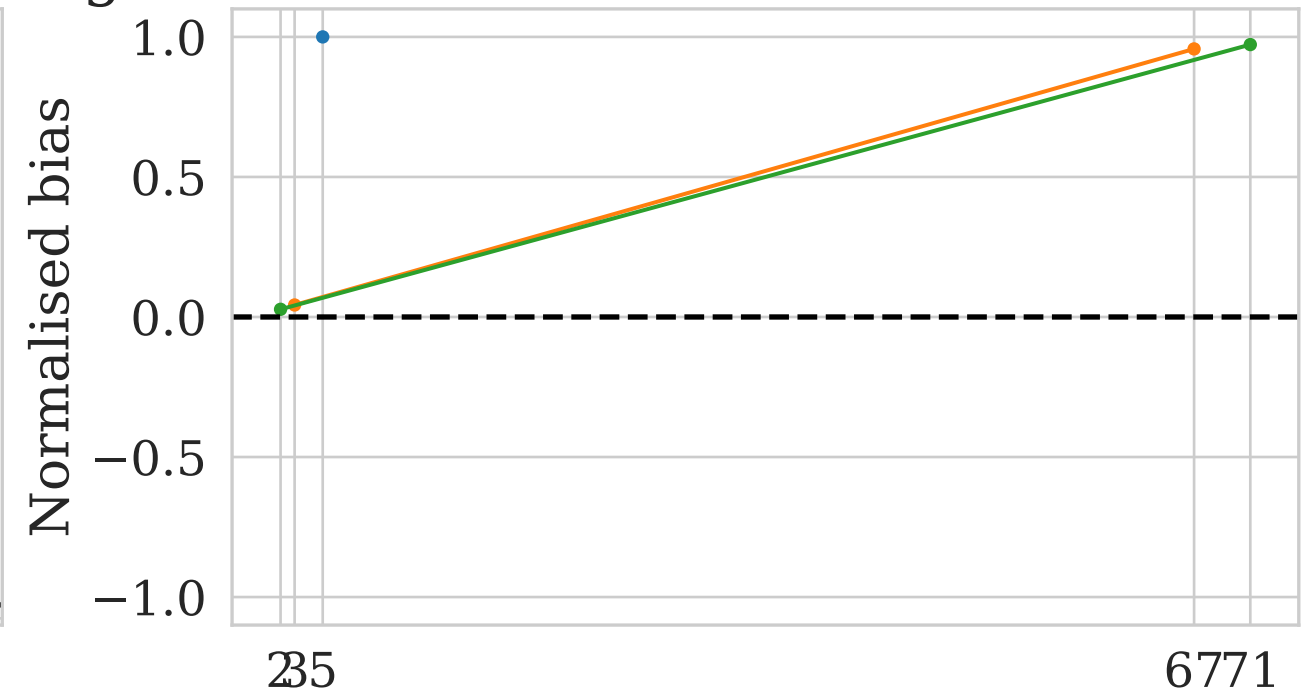

Class 0    Class 1    Class 2

59-uniform hypergraph, number of hyperedges: 2

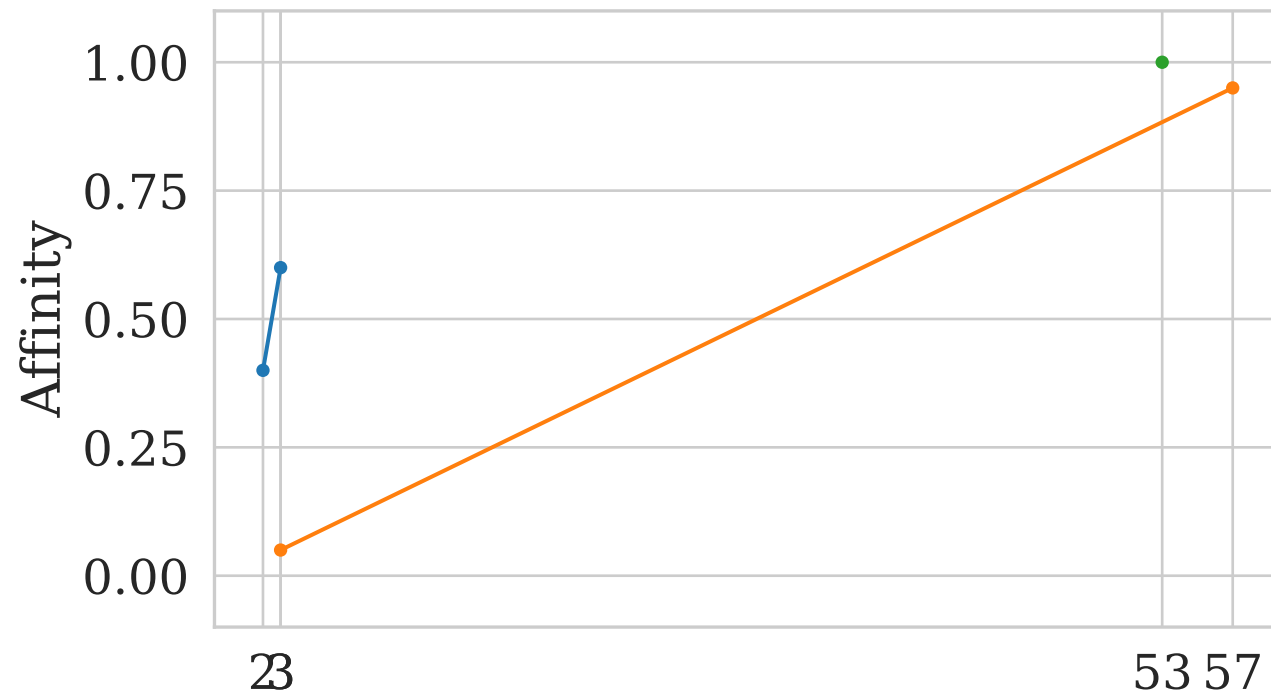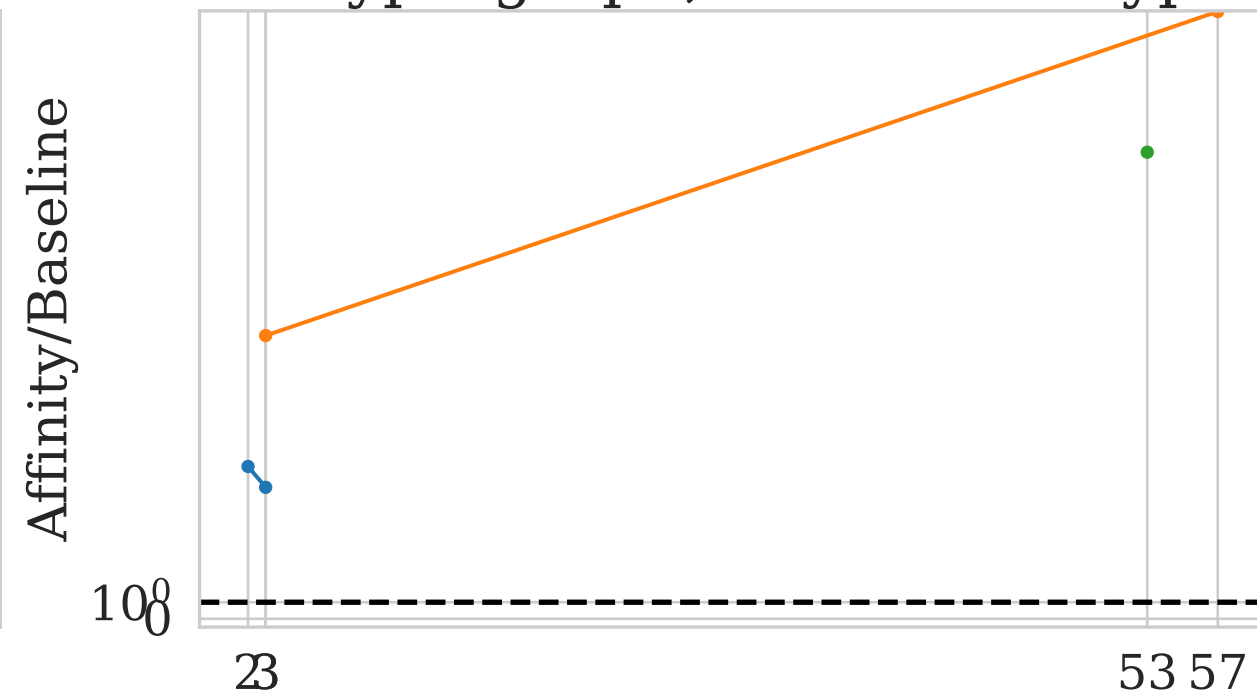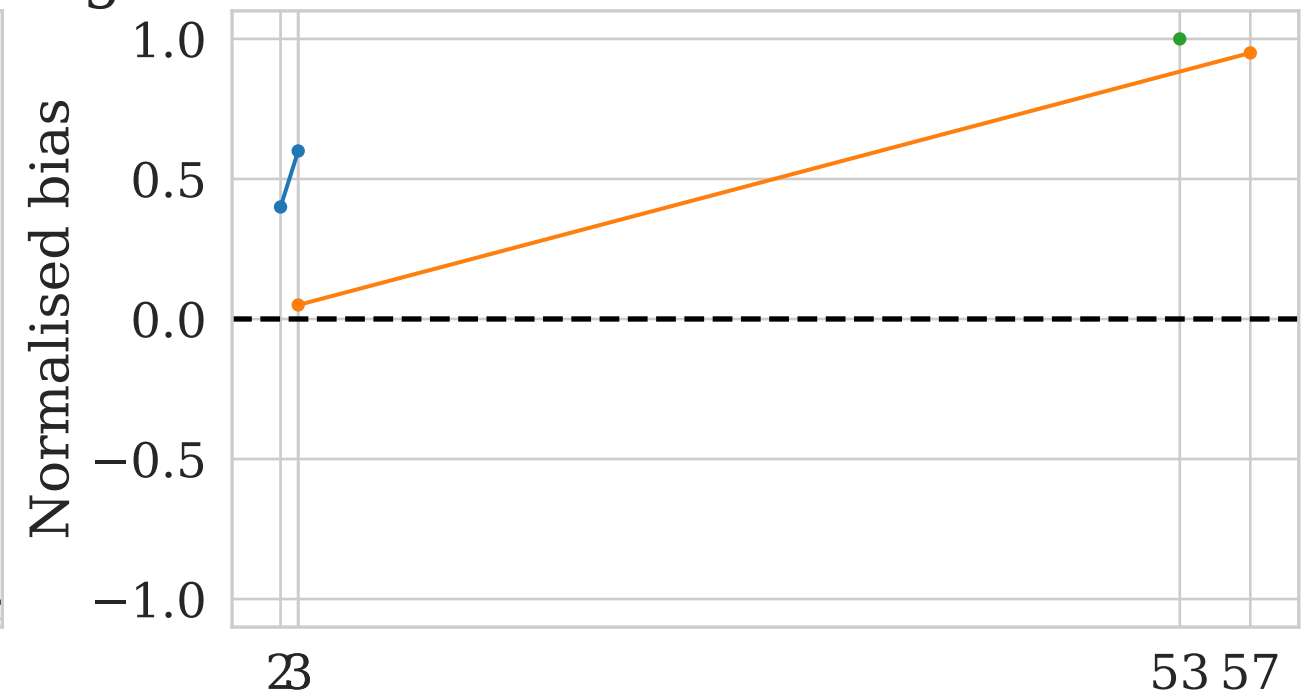

Class 0 Class 1 Class 2



34-uniform hypergraph, number of hyperedges: 2

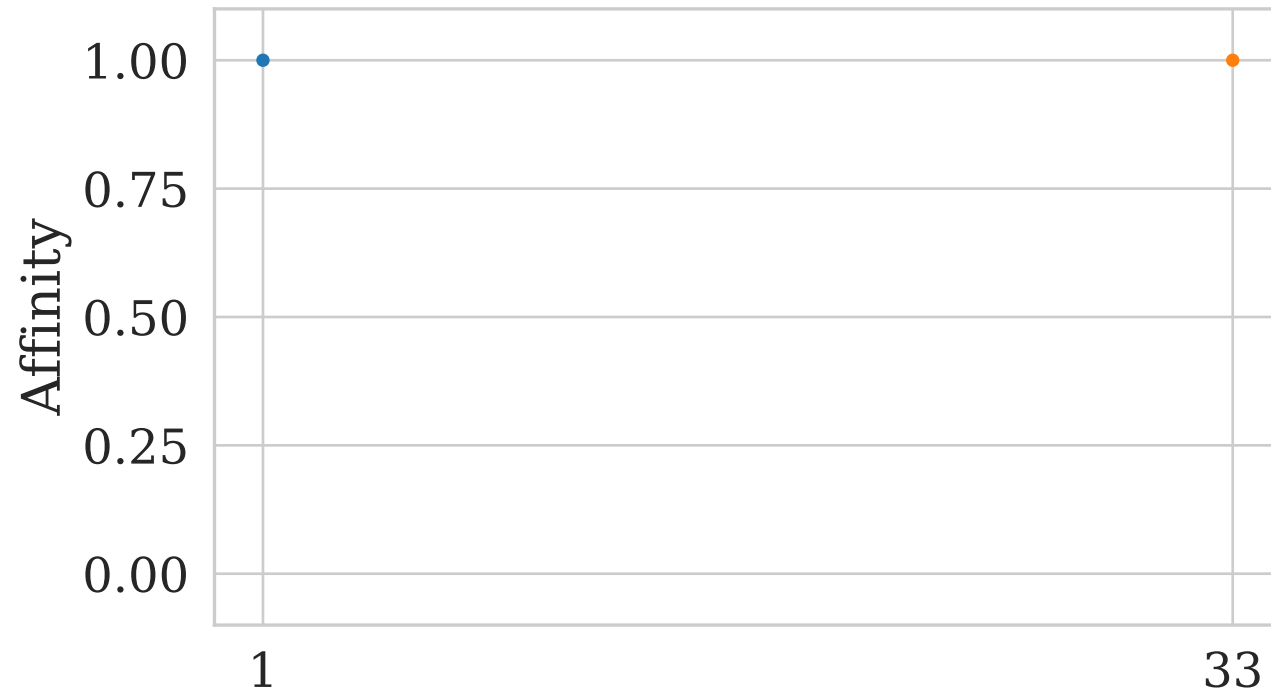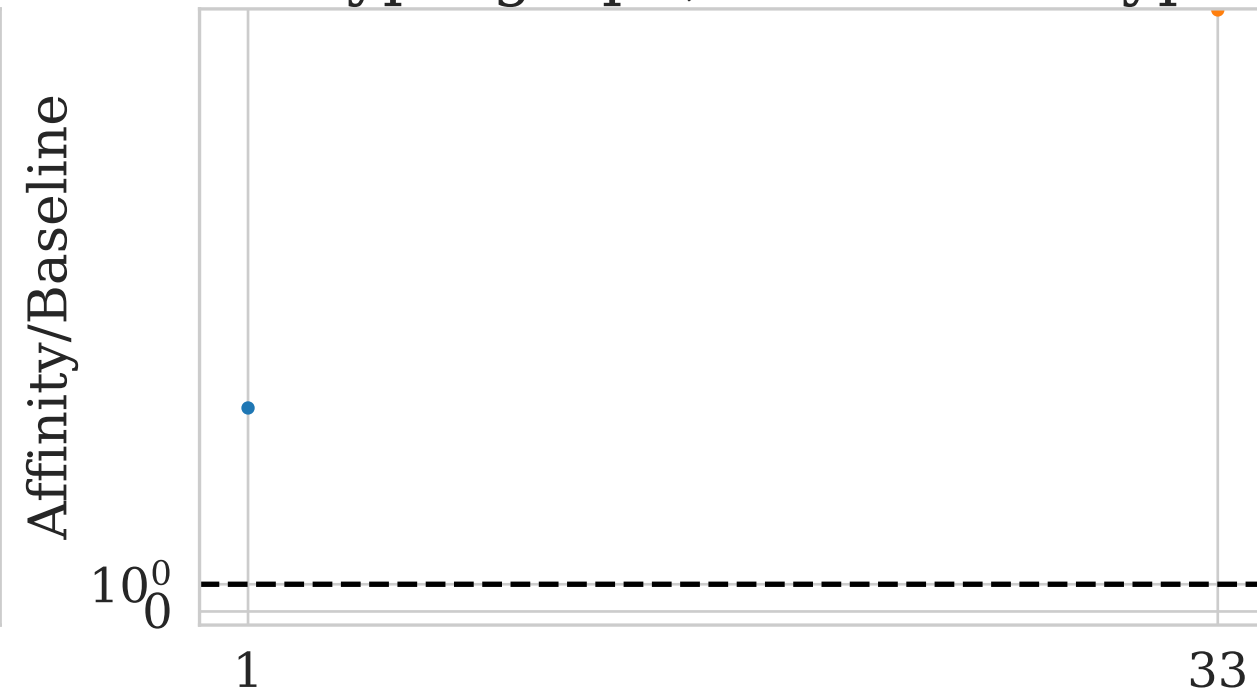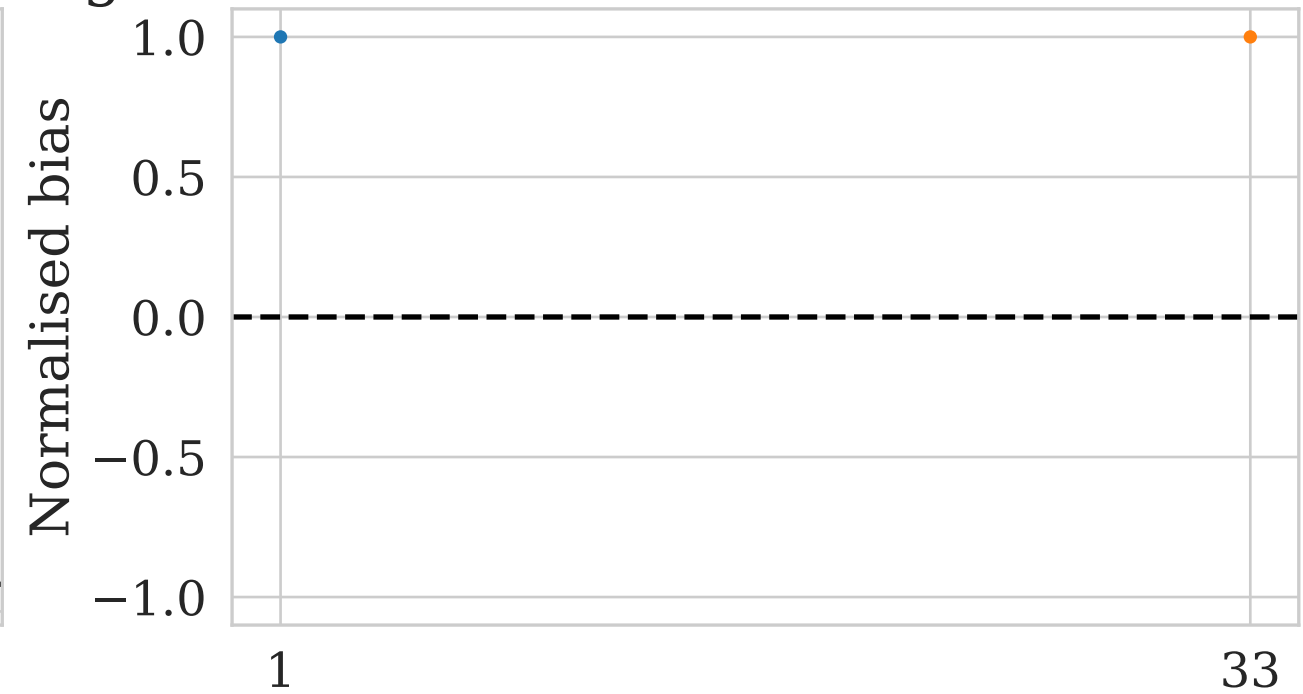

Class 0    Class 1    Class 2

171-uniform hypergraph, number of hyperedges: 1

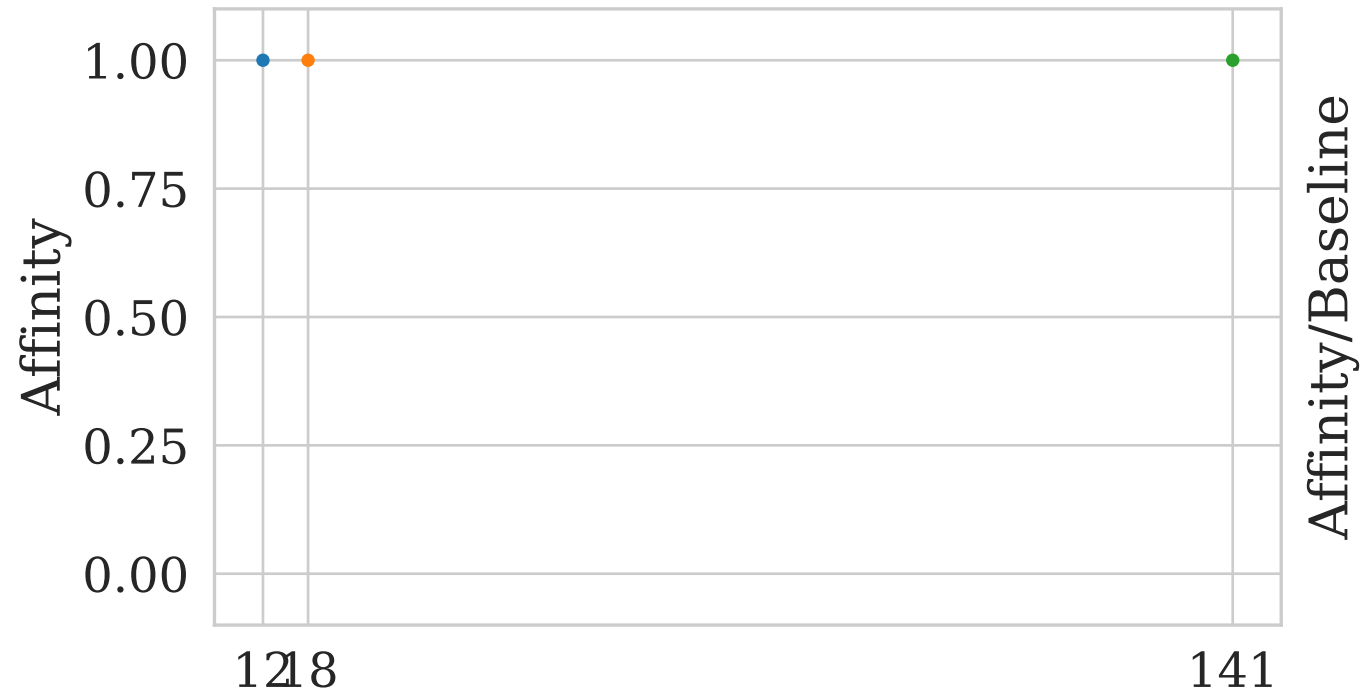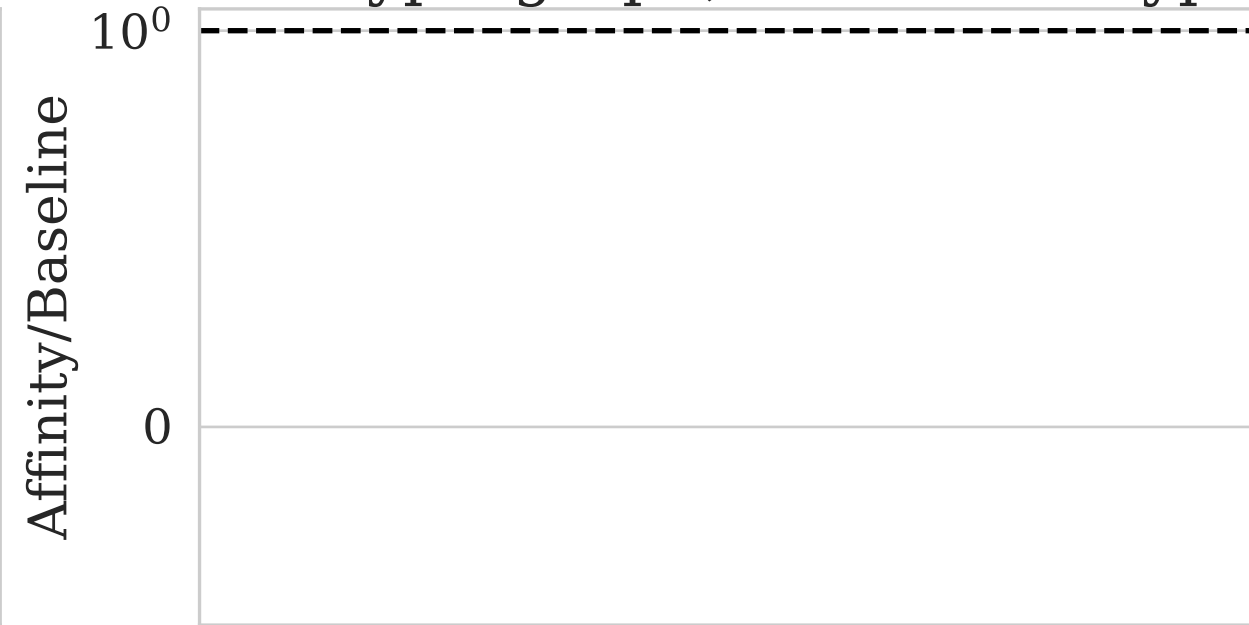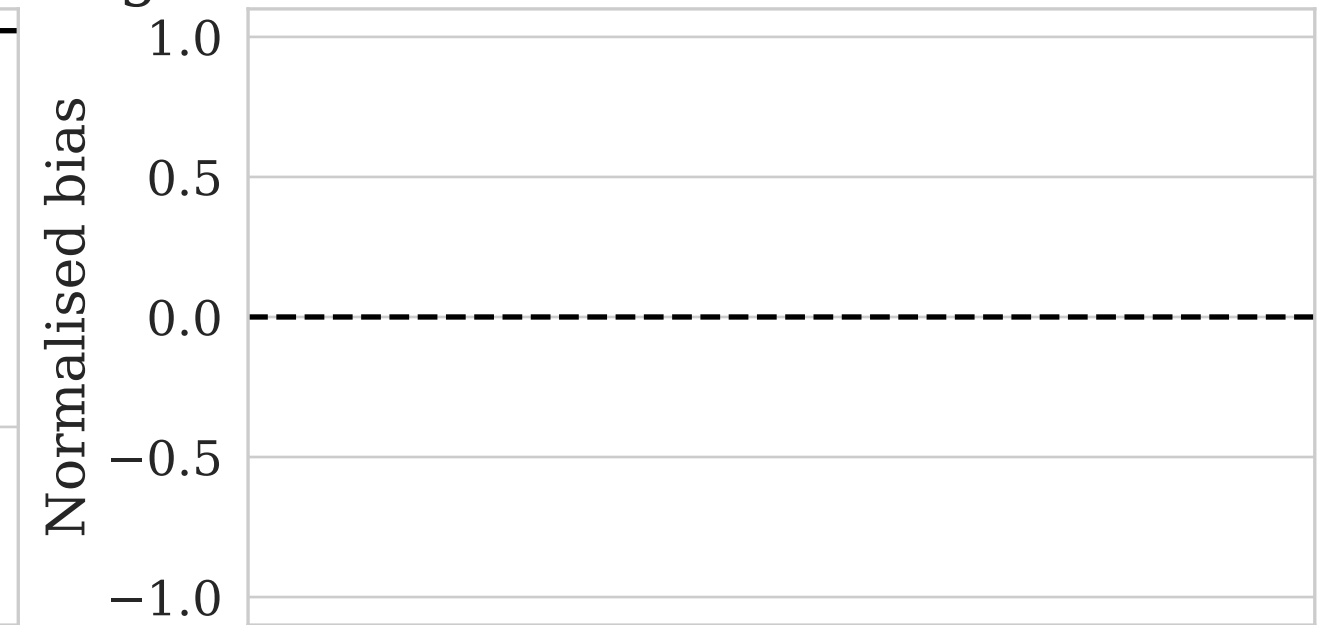

Class 0 Class 1 Class 2

154-uniform hypergraph, number of hyperedges: 1

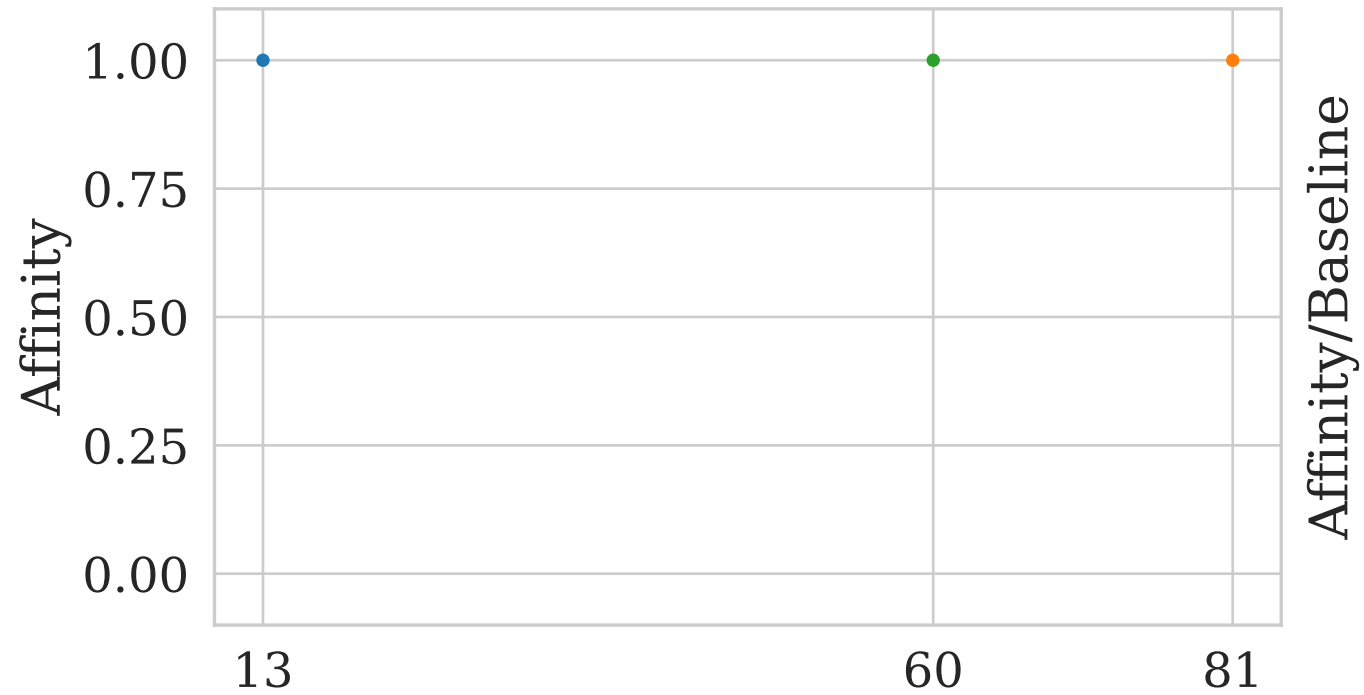

Affinity/Baseline

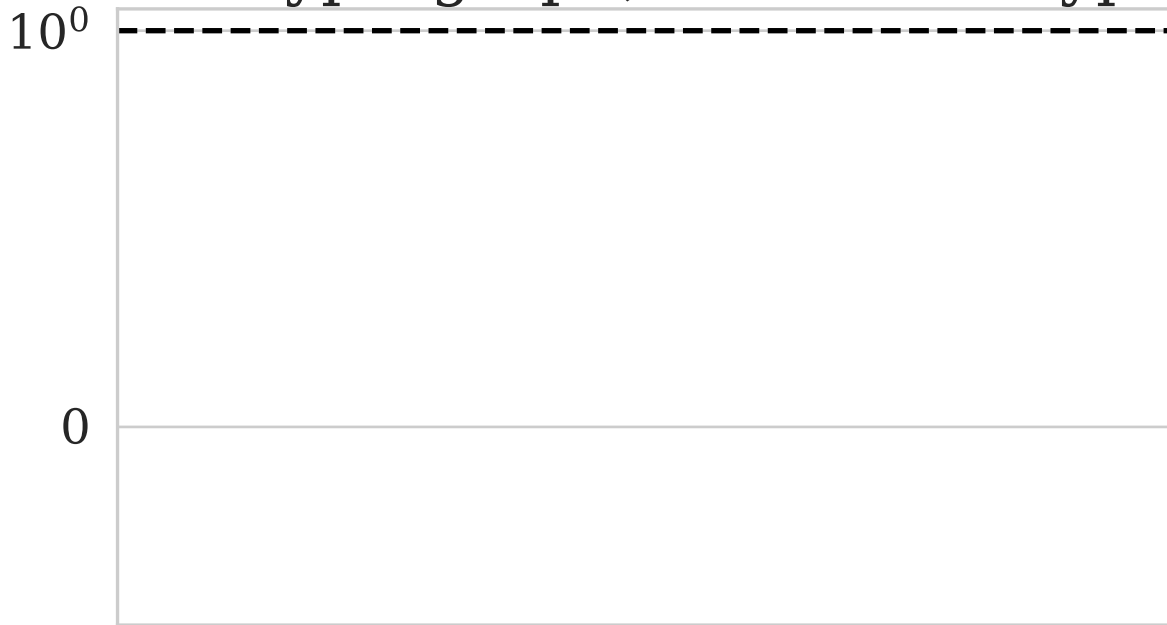

Normalised bias

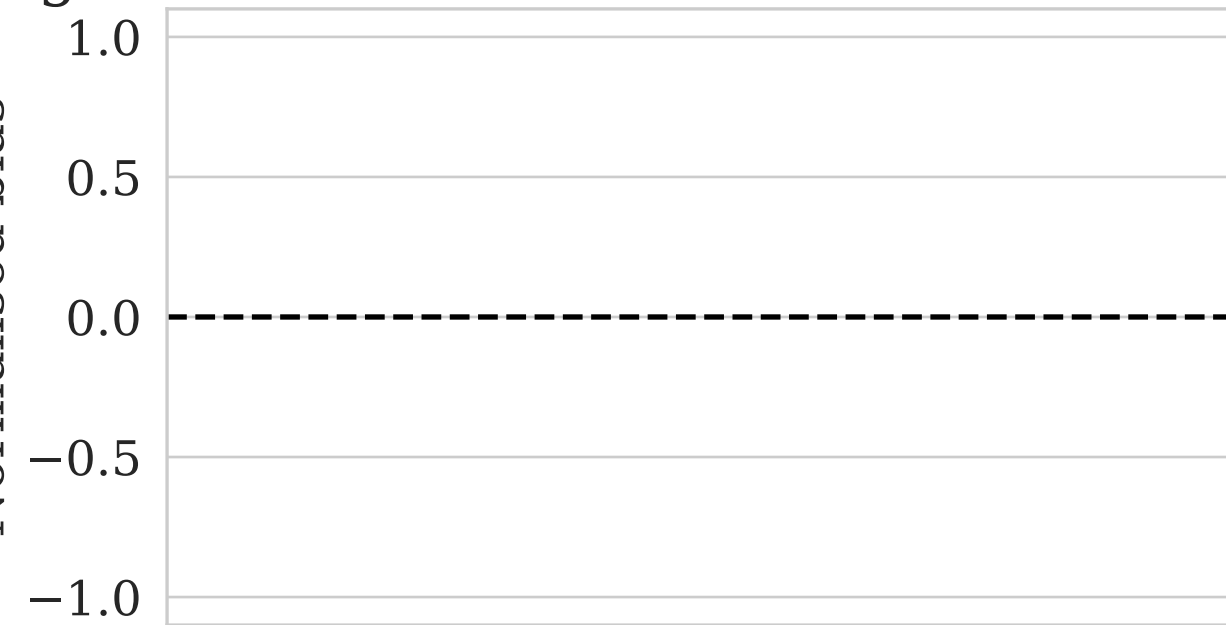

Class 0    Class 1    Class 2

57-uniform hypergraph, number of hyperedges: 1

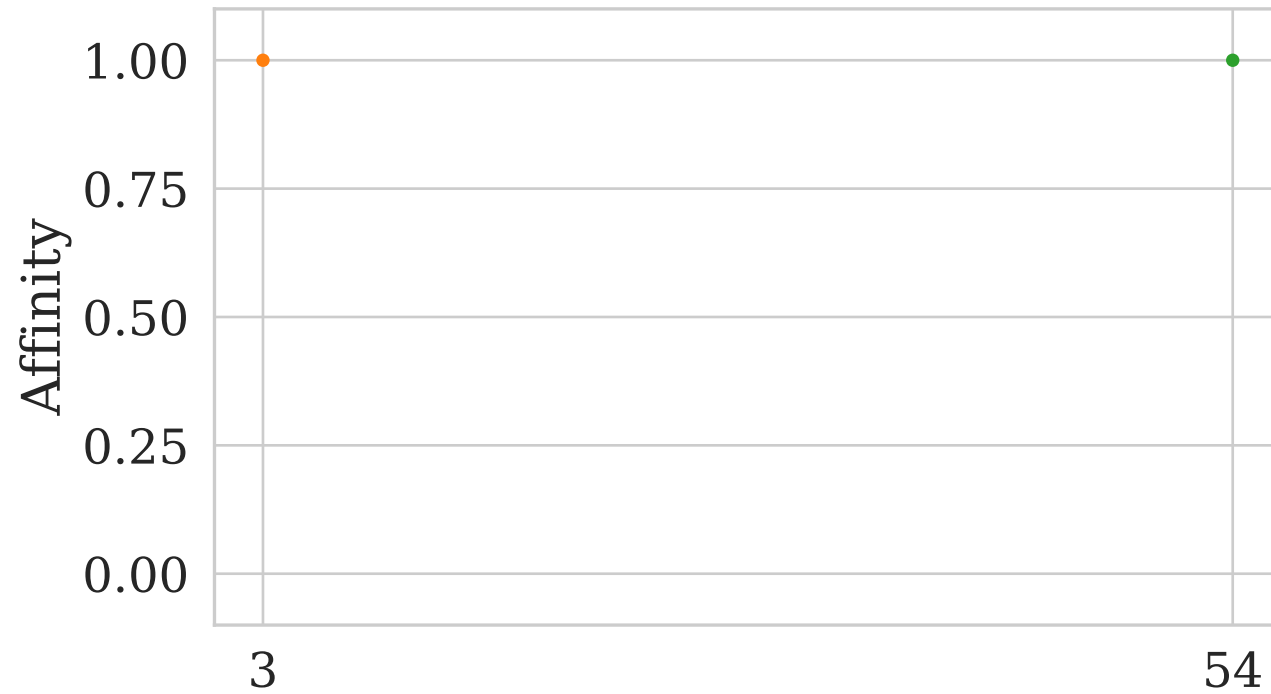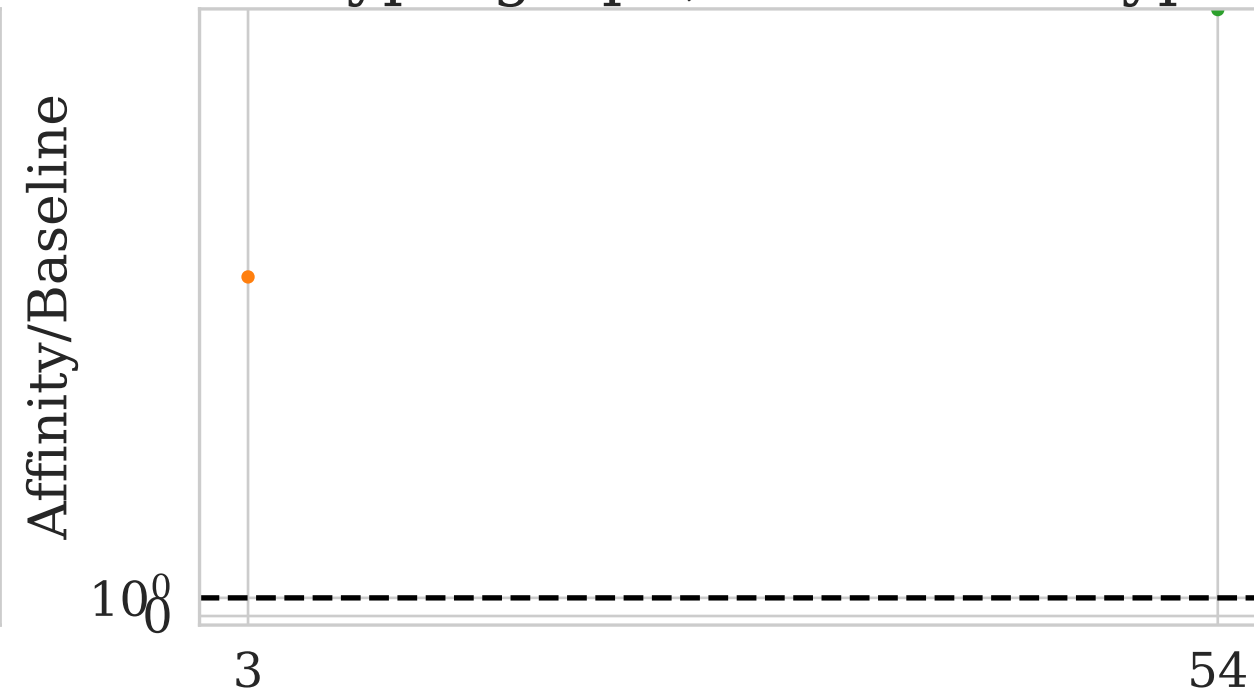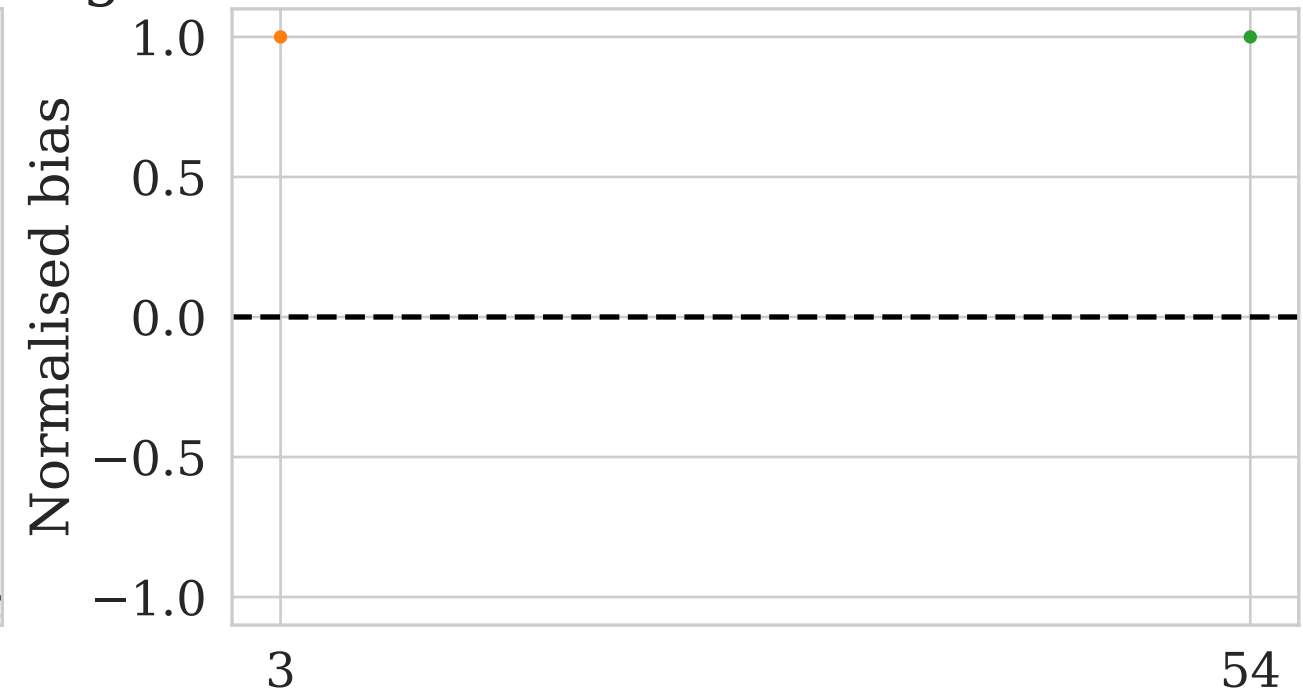

Class 0 Class 1 Class 2

120-uniform hypergraph, number of hyperedges: 1

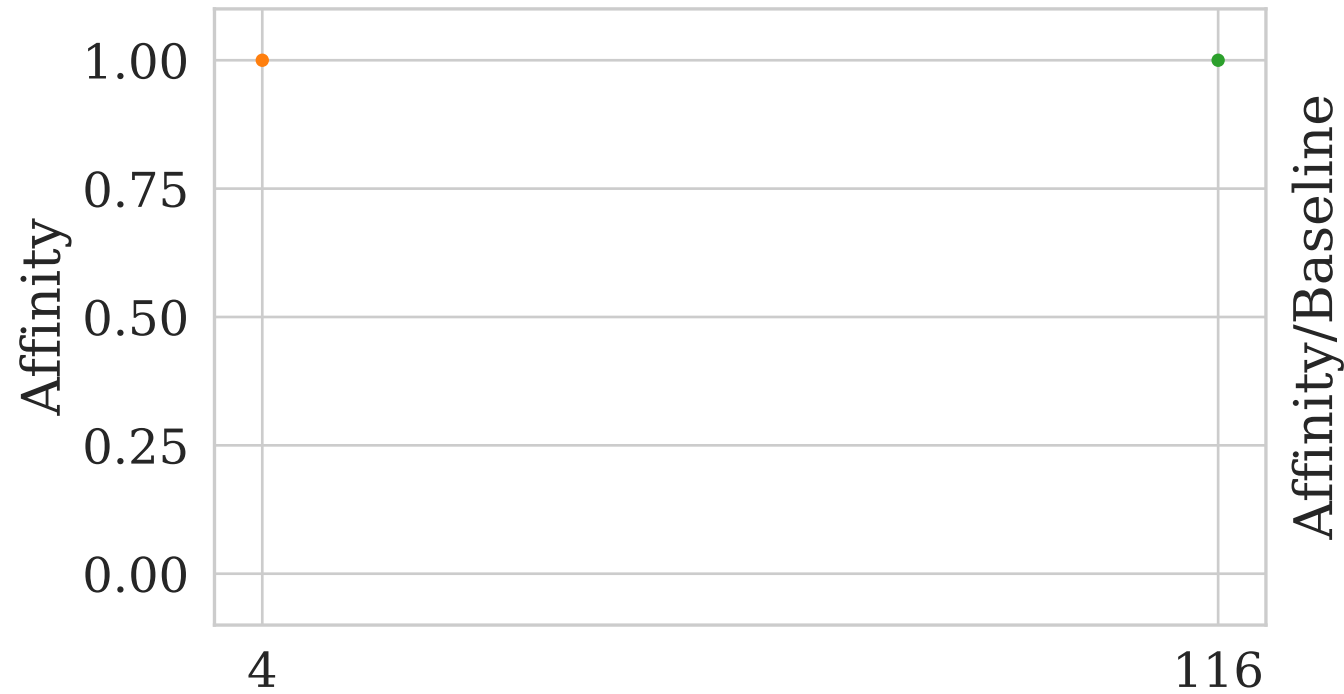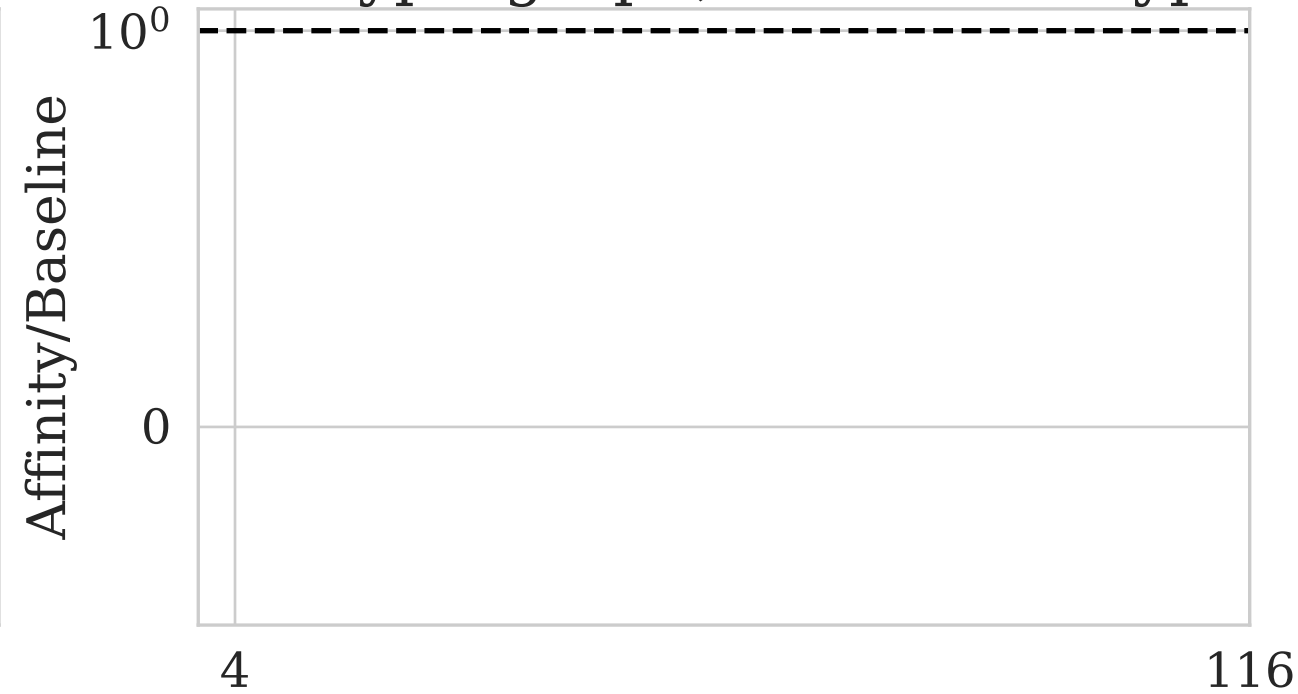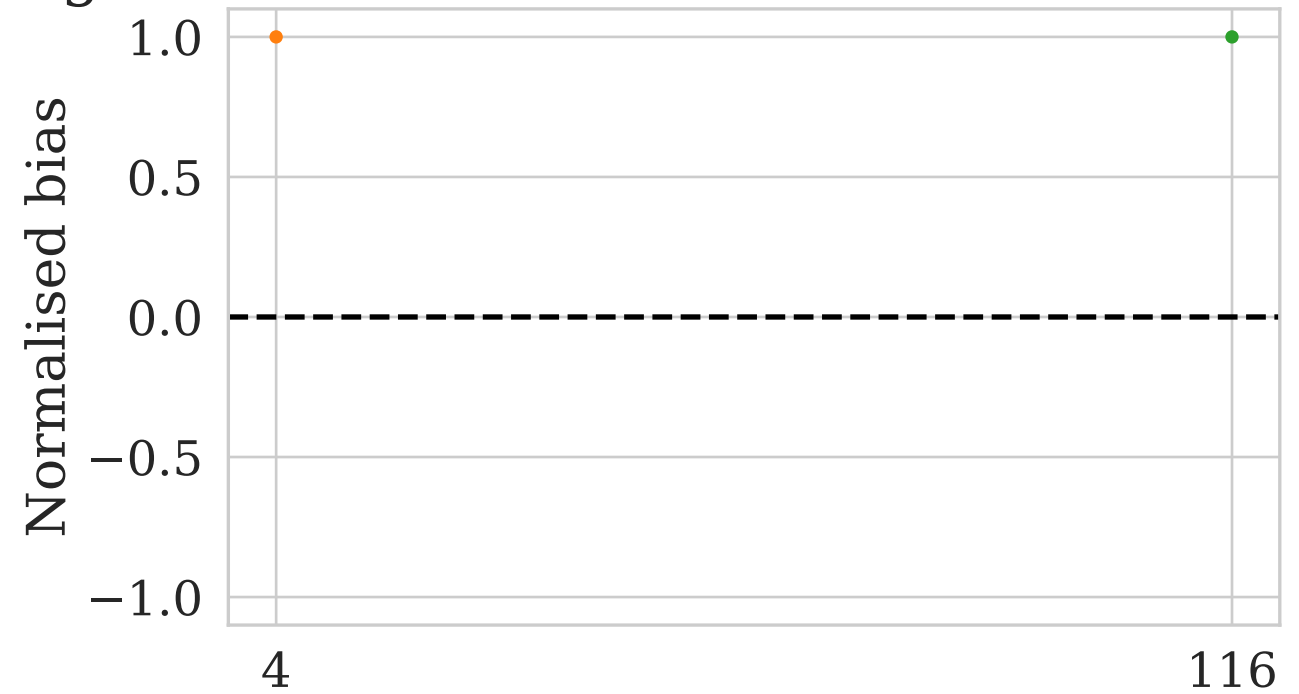

Class 0 Class 1 Class 2

72-uniform hypergraph, number of hyperedges: 1

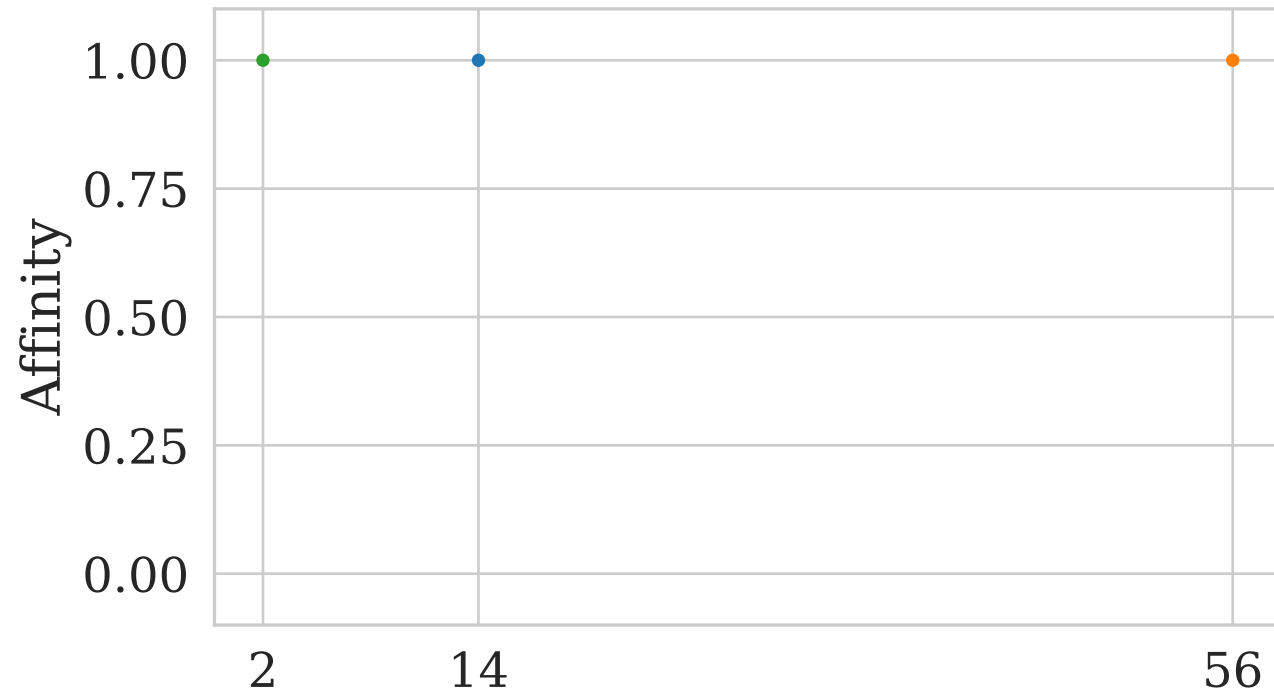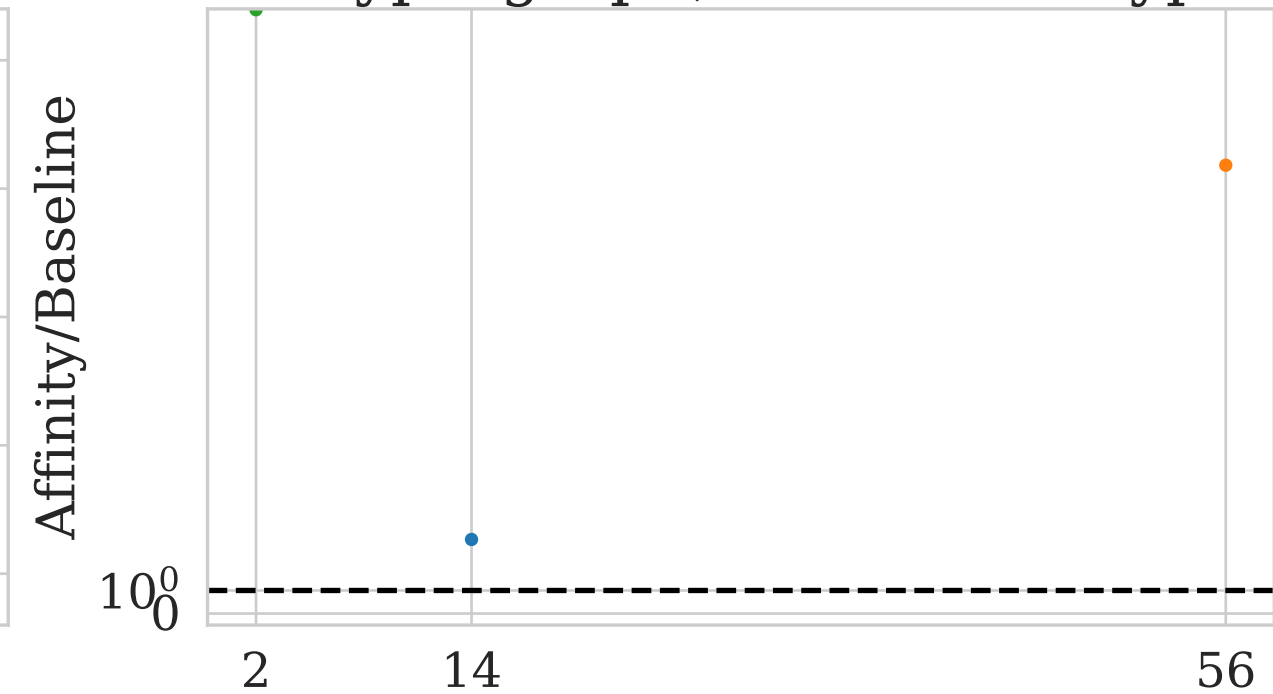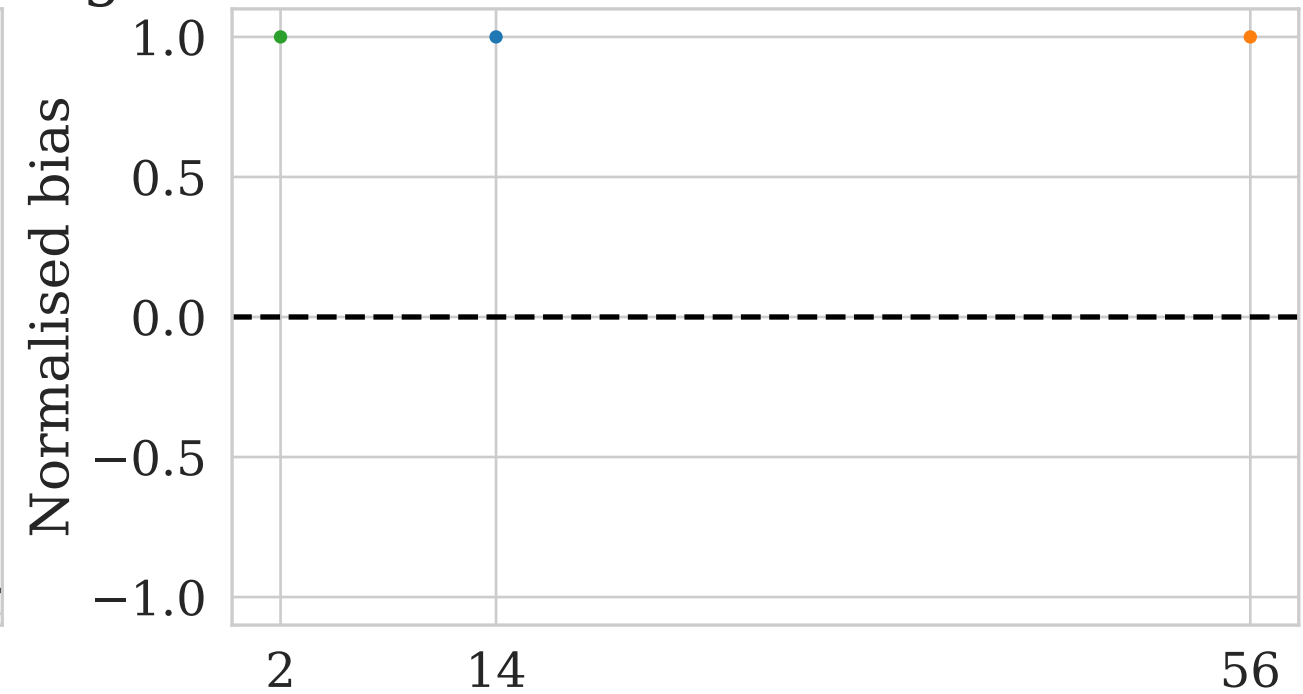

Class 0 Class 1 Class 2

69-uniform hypergraph, number of hyperedges: 1

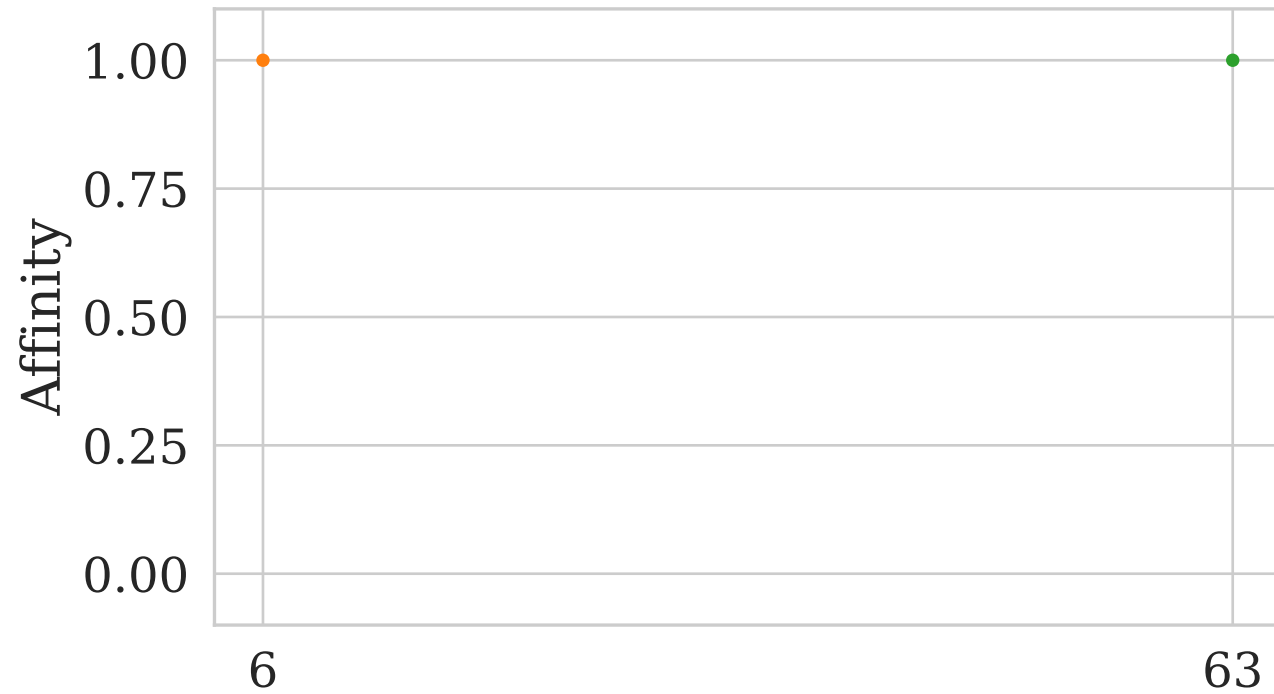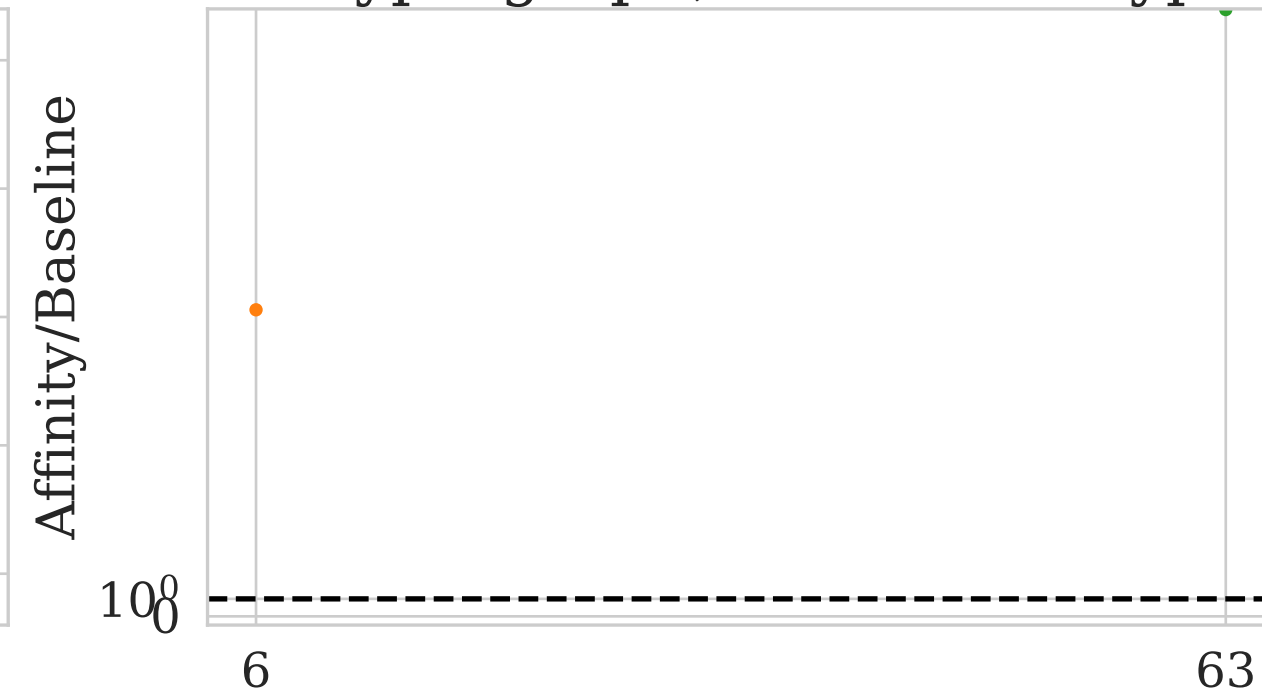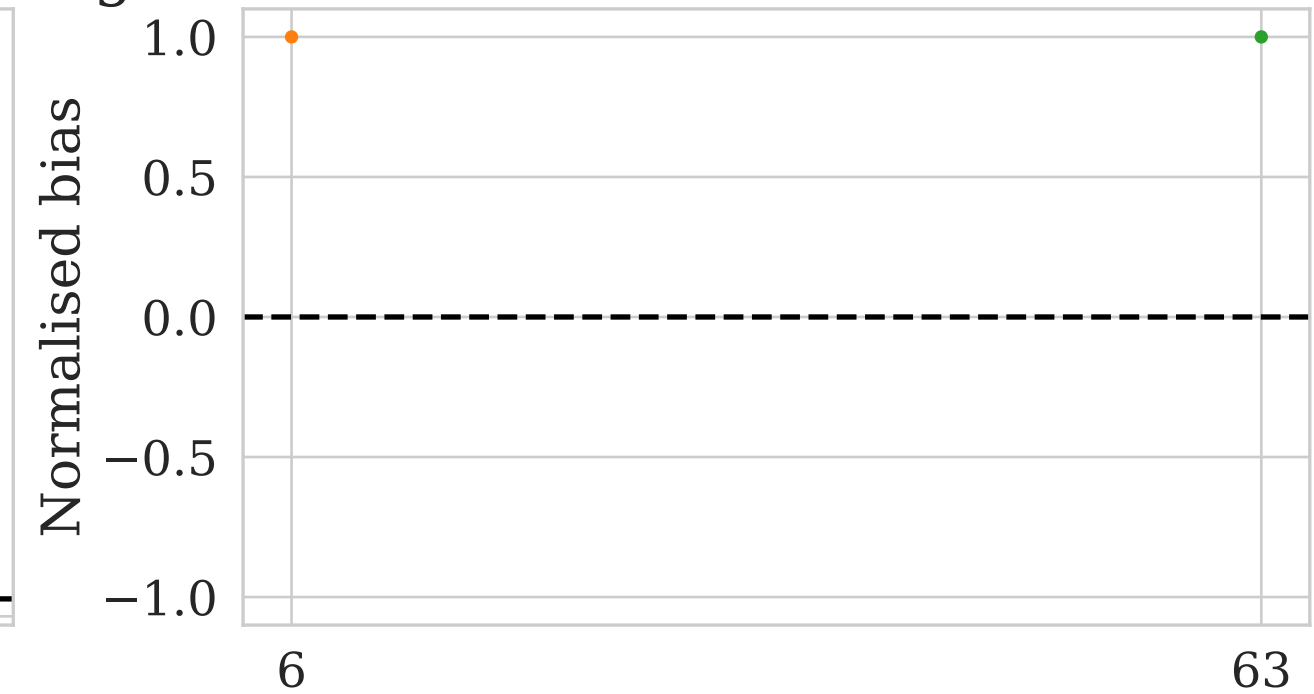

Class 0 Class 1 Class 2

66-uniform hypergraph, number of hyperedges: 1

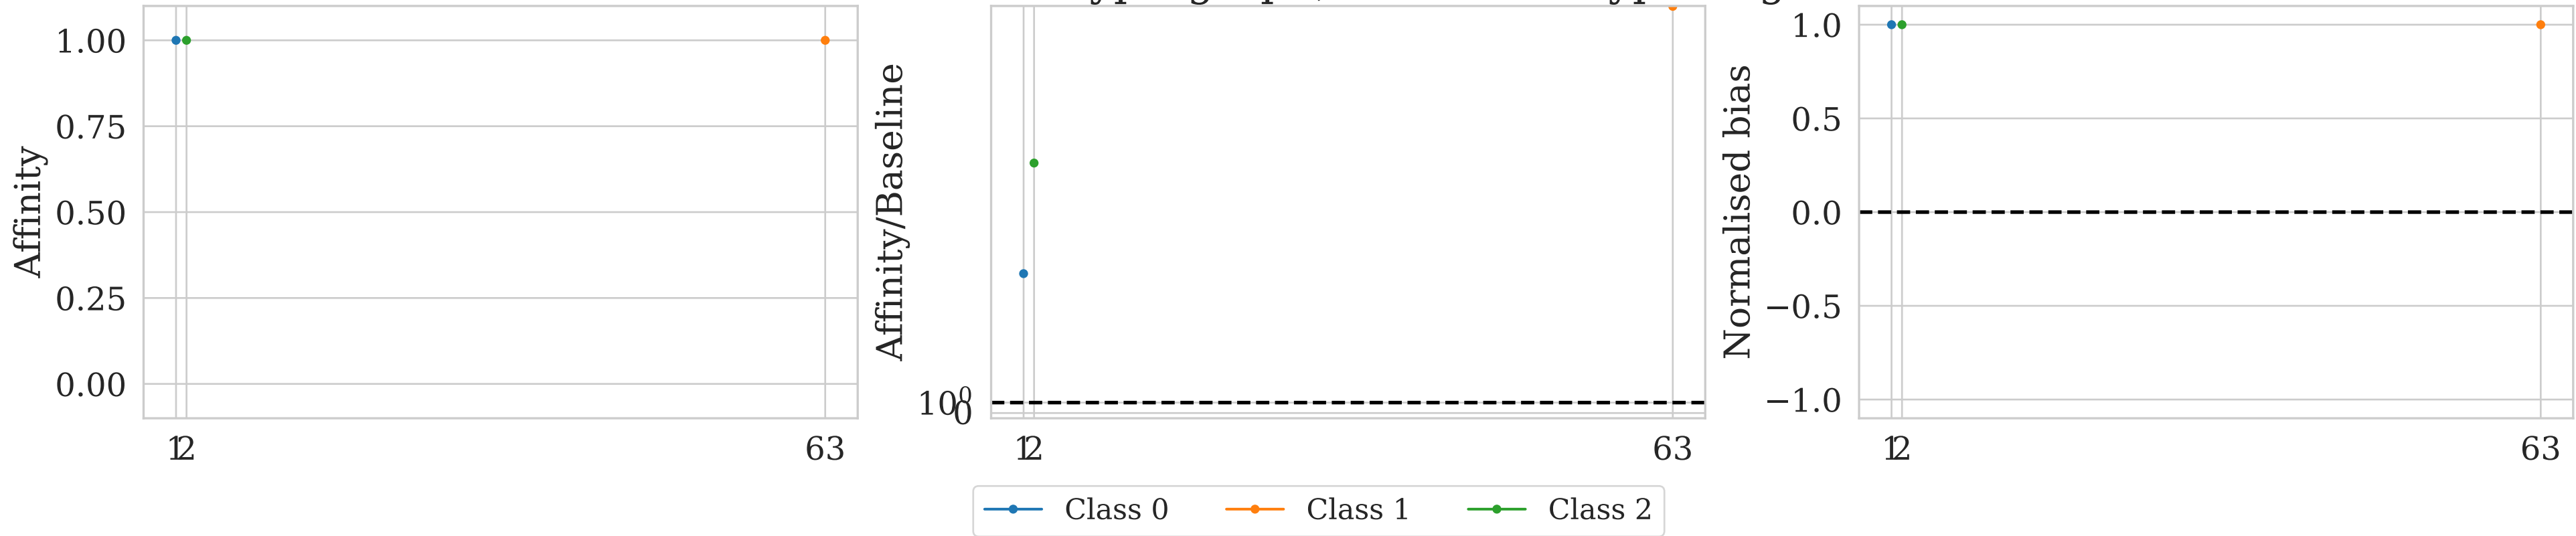



64-uniform hypergraph, number of hyperedges: 1

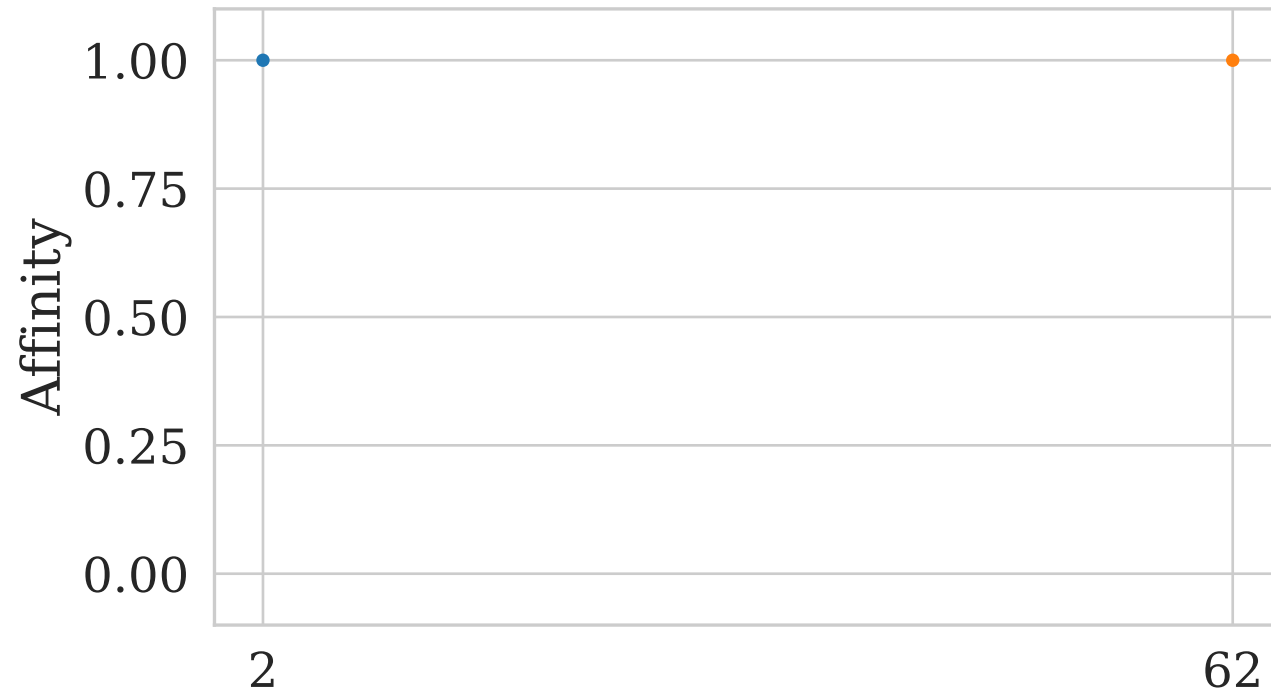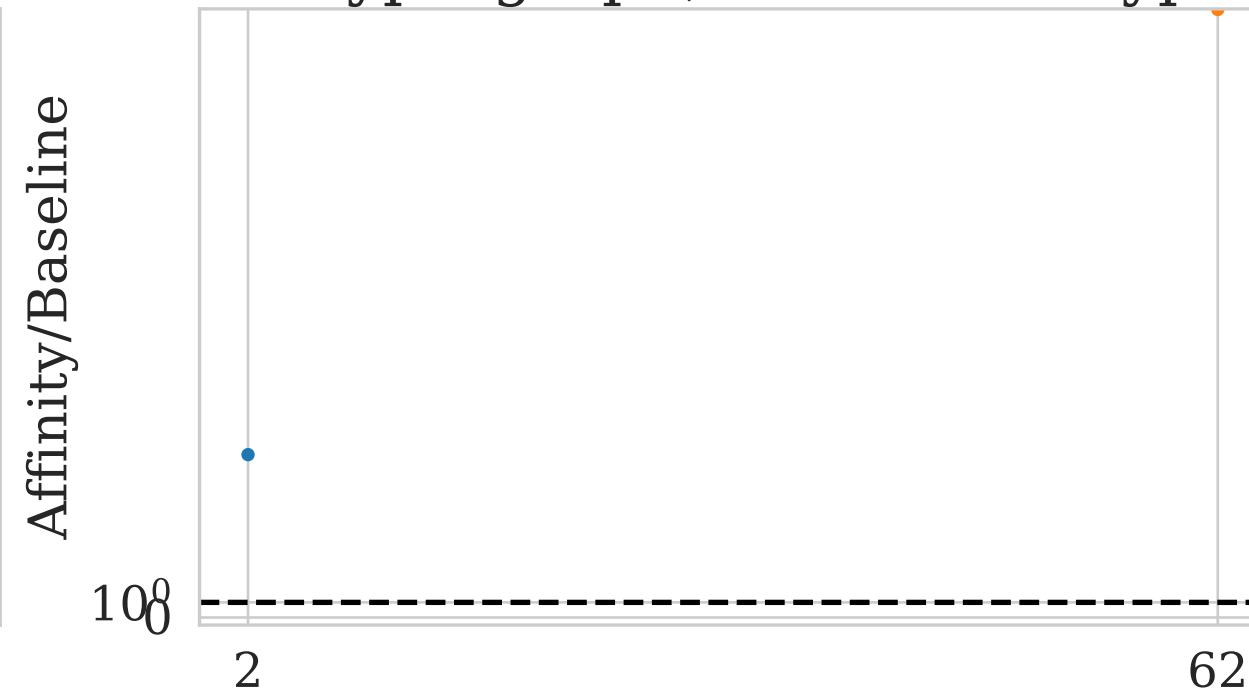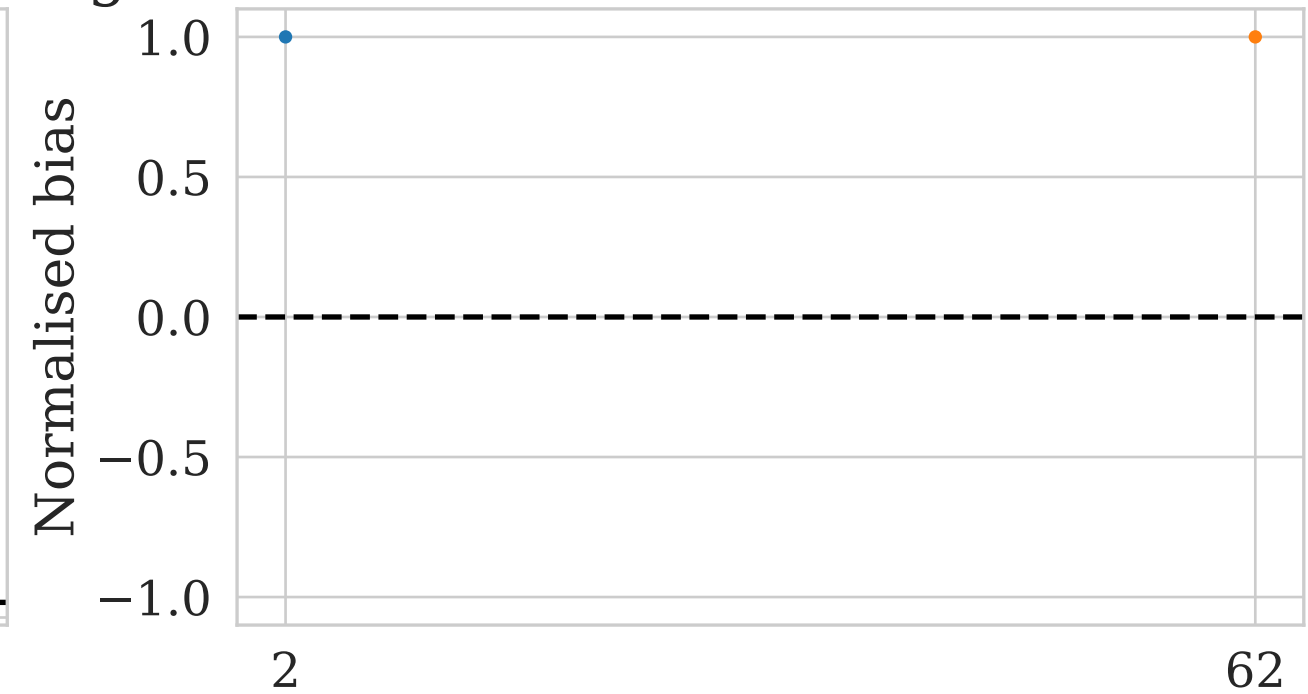

Class 0    Class 1    Class 2

62-uniform hypergraph, number of hyperedges: 1

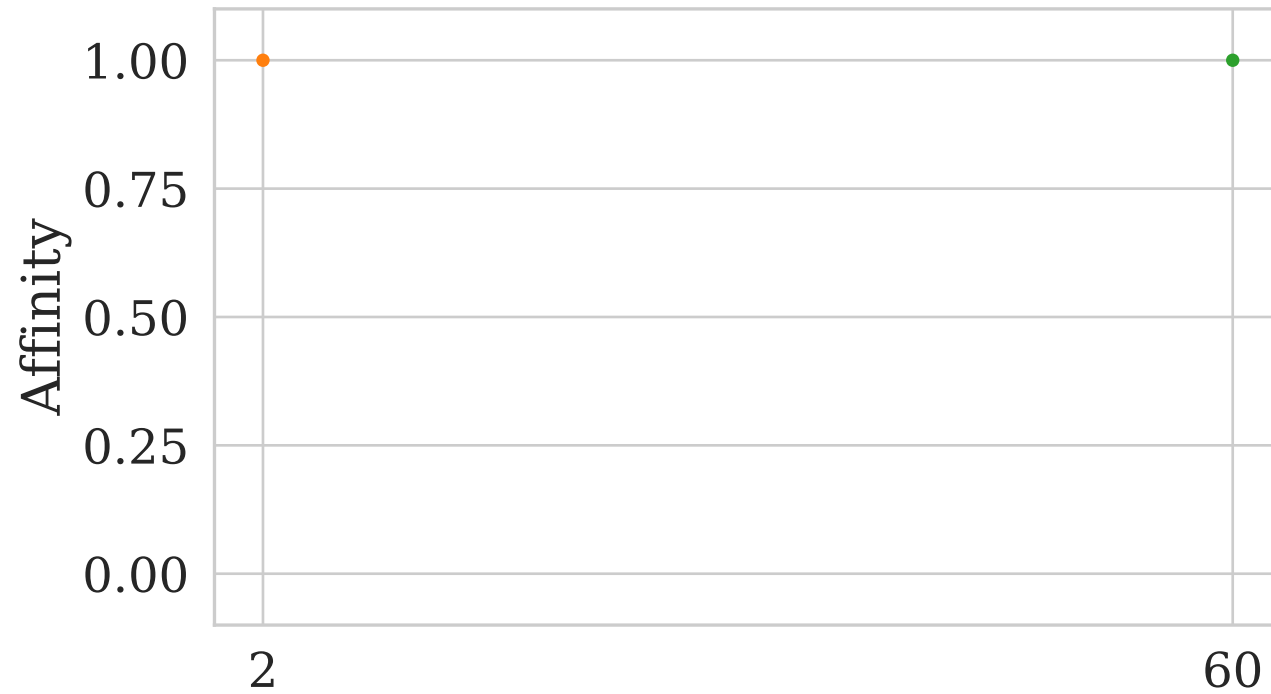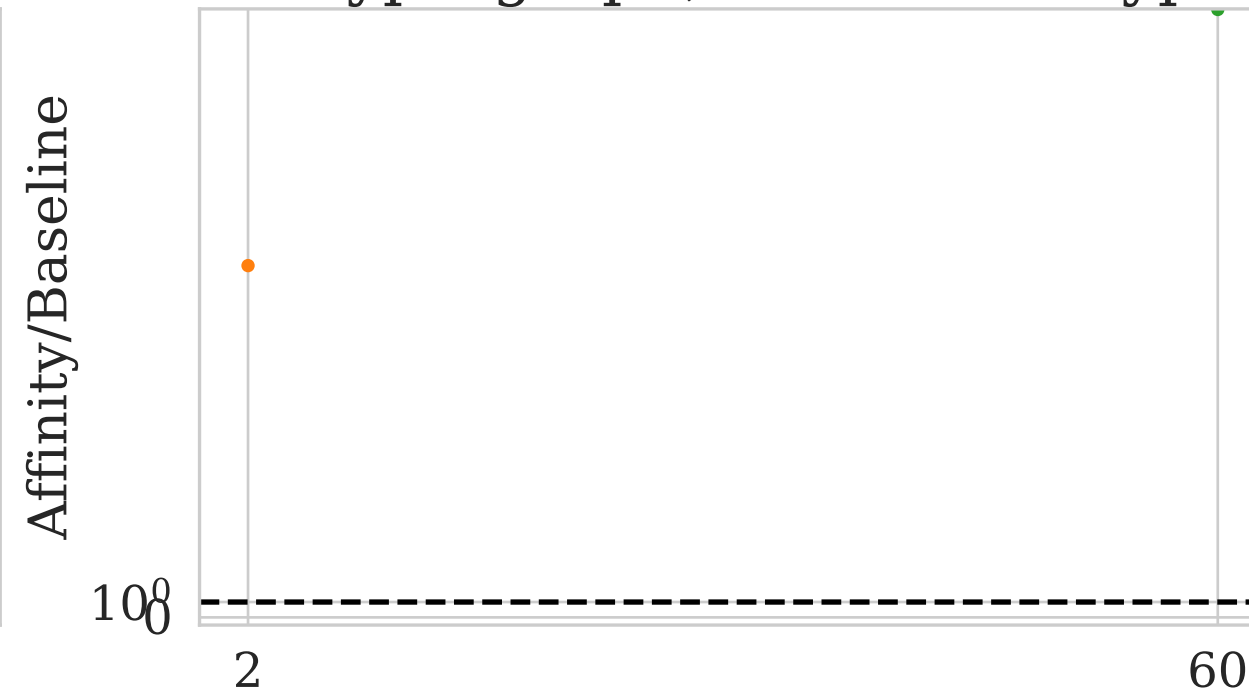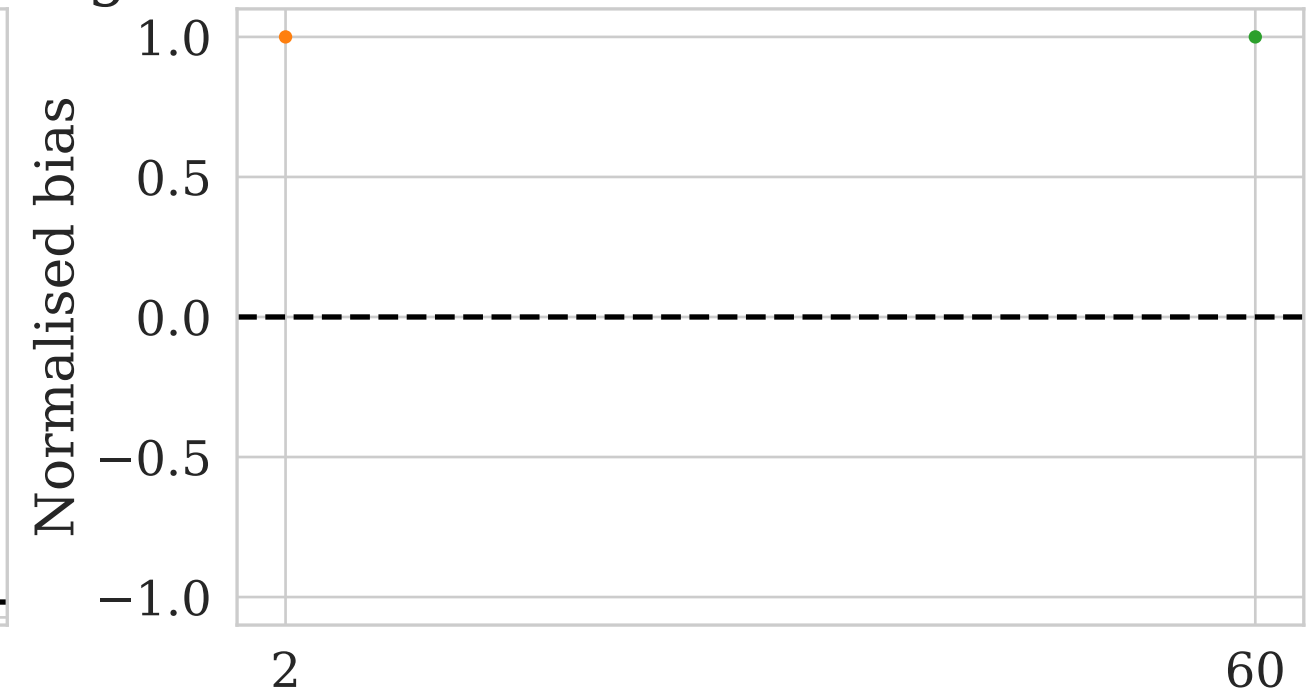

Class 0 Class 1 Class 2

60-uniform hypergraph, number of hyperedges: 1

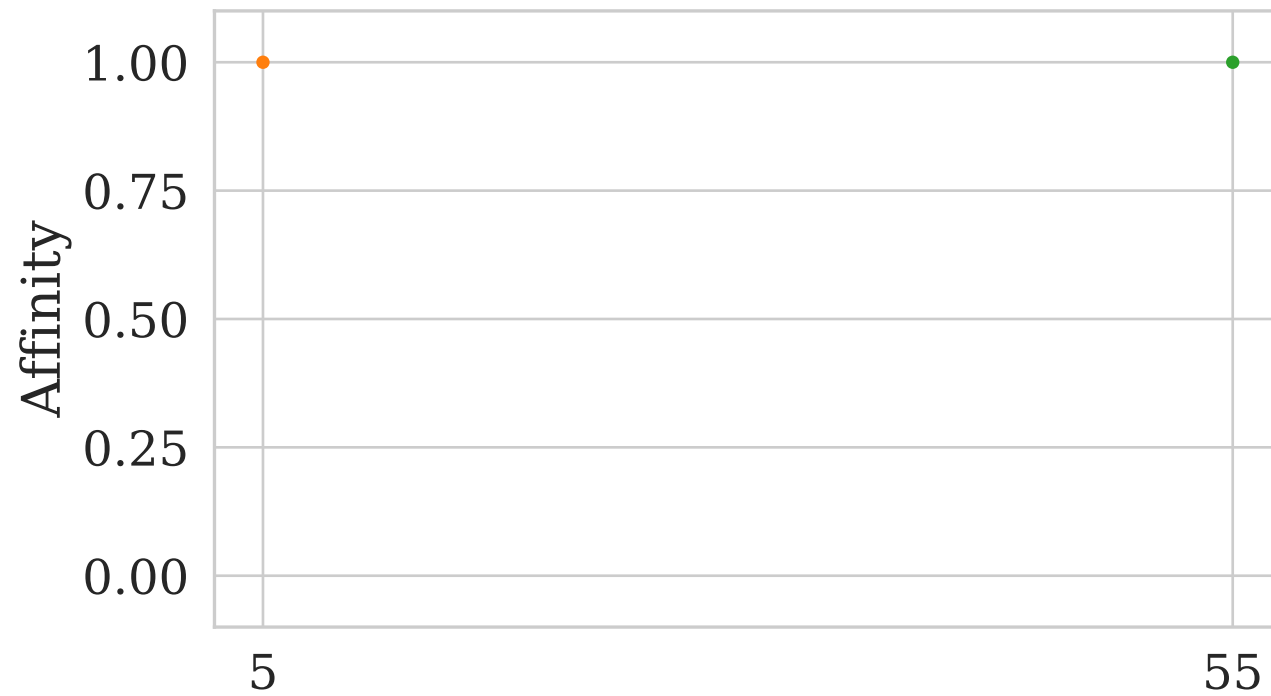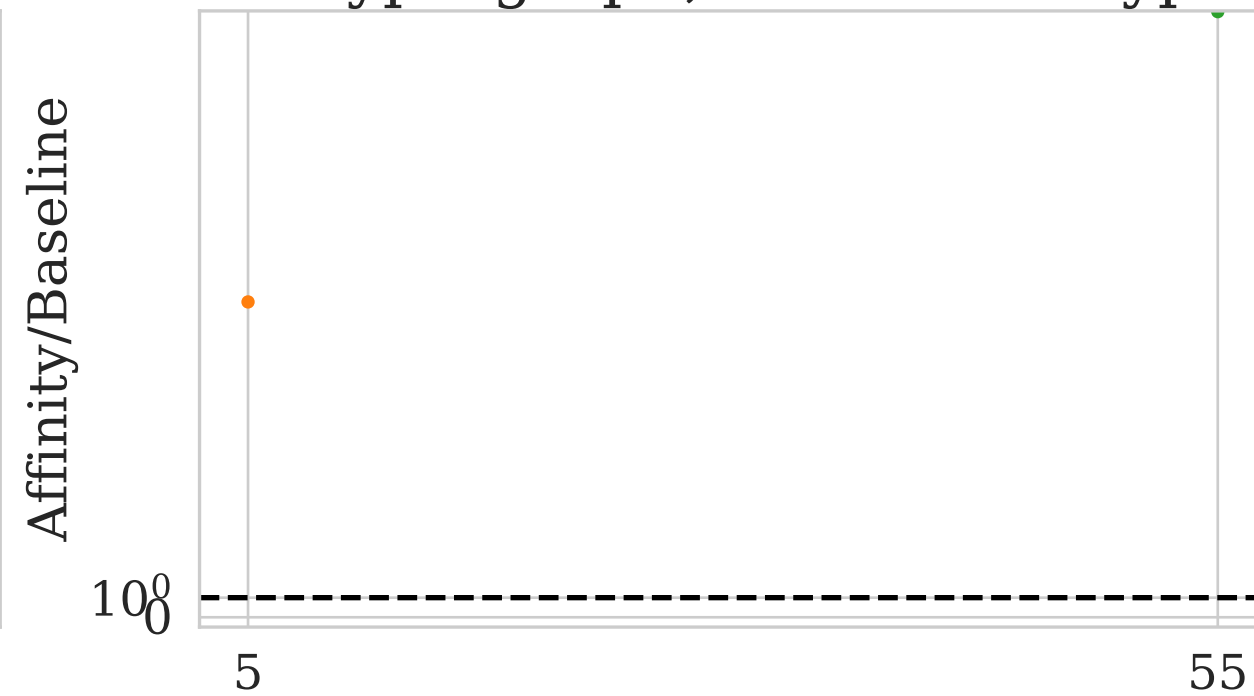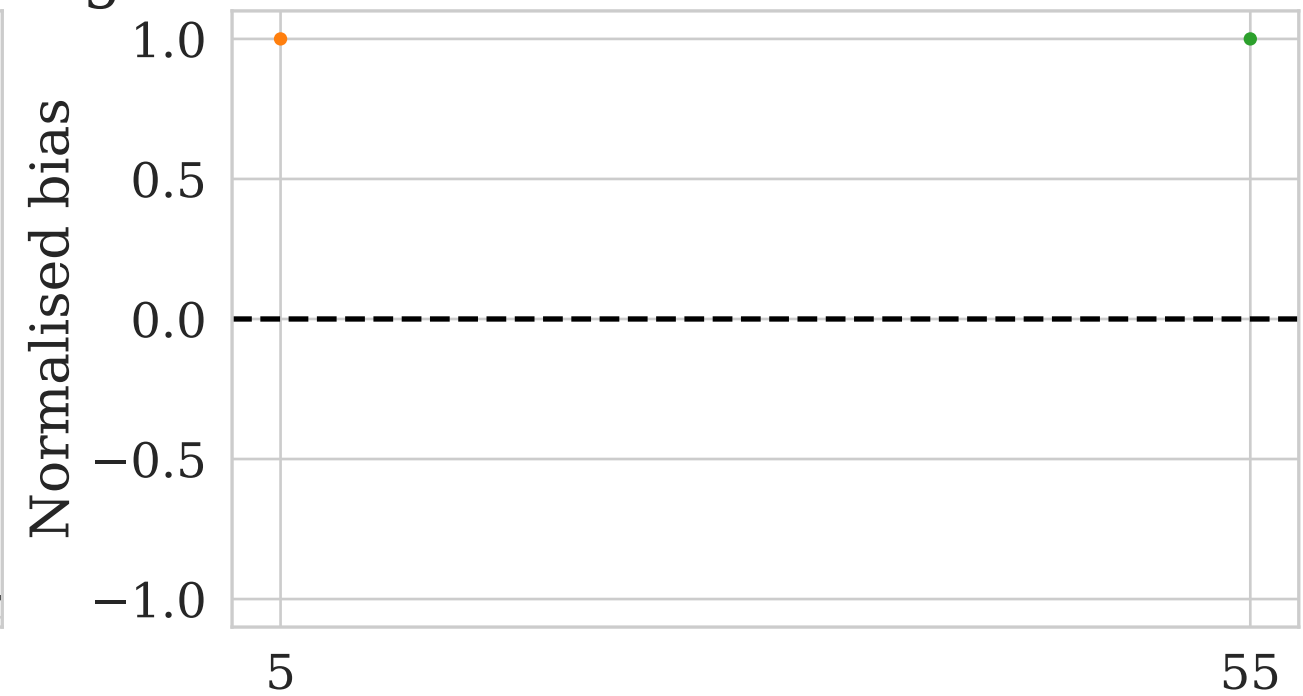

Class 0 Class 1 Class 2

56-uniform hypergraph, number of hyperedges: 1

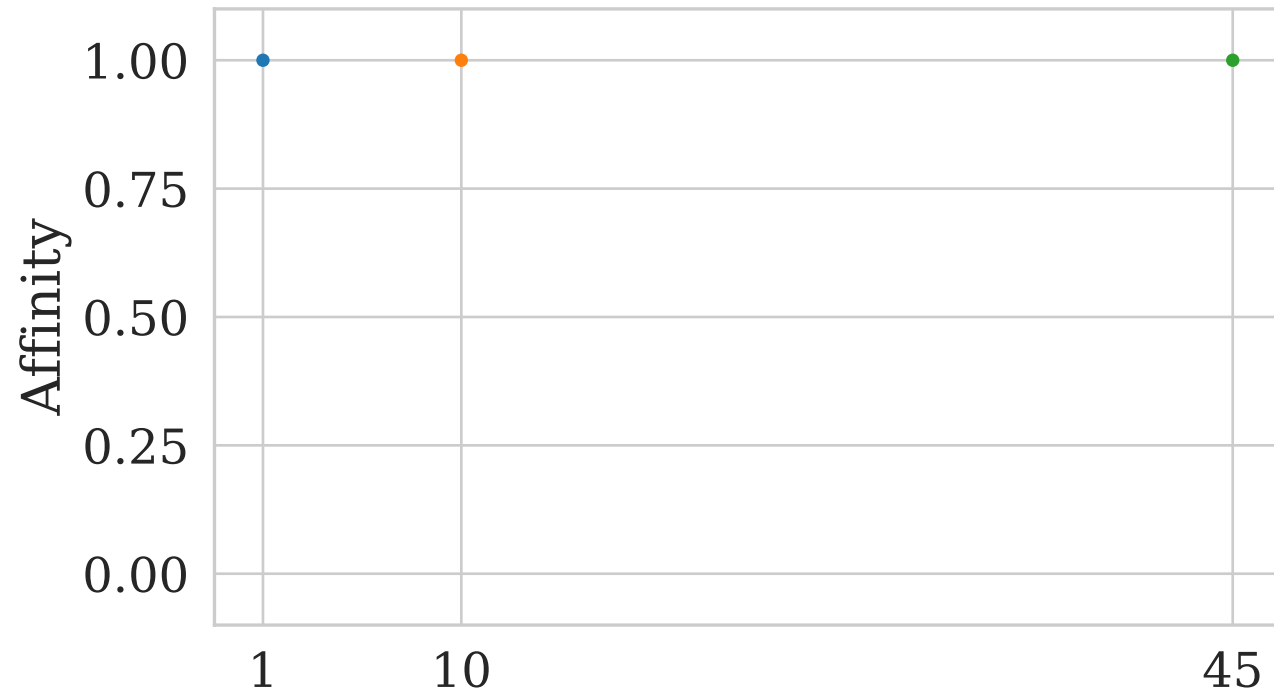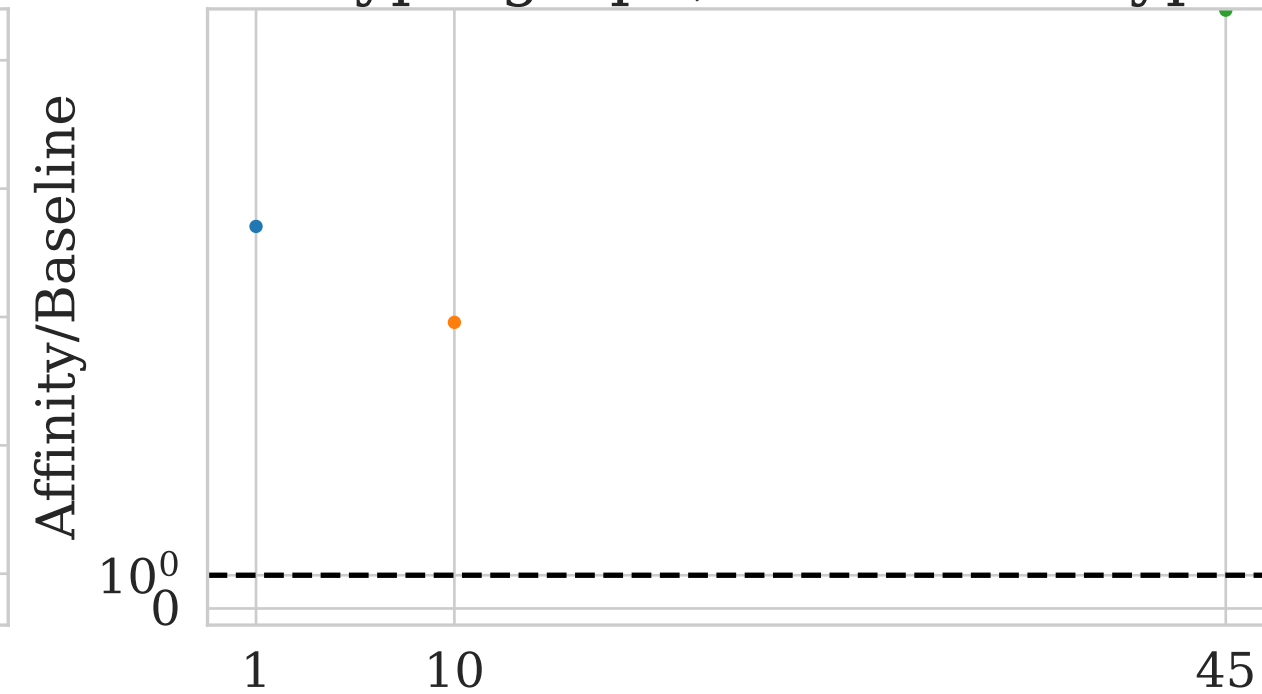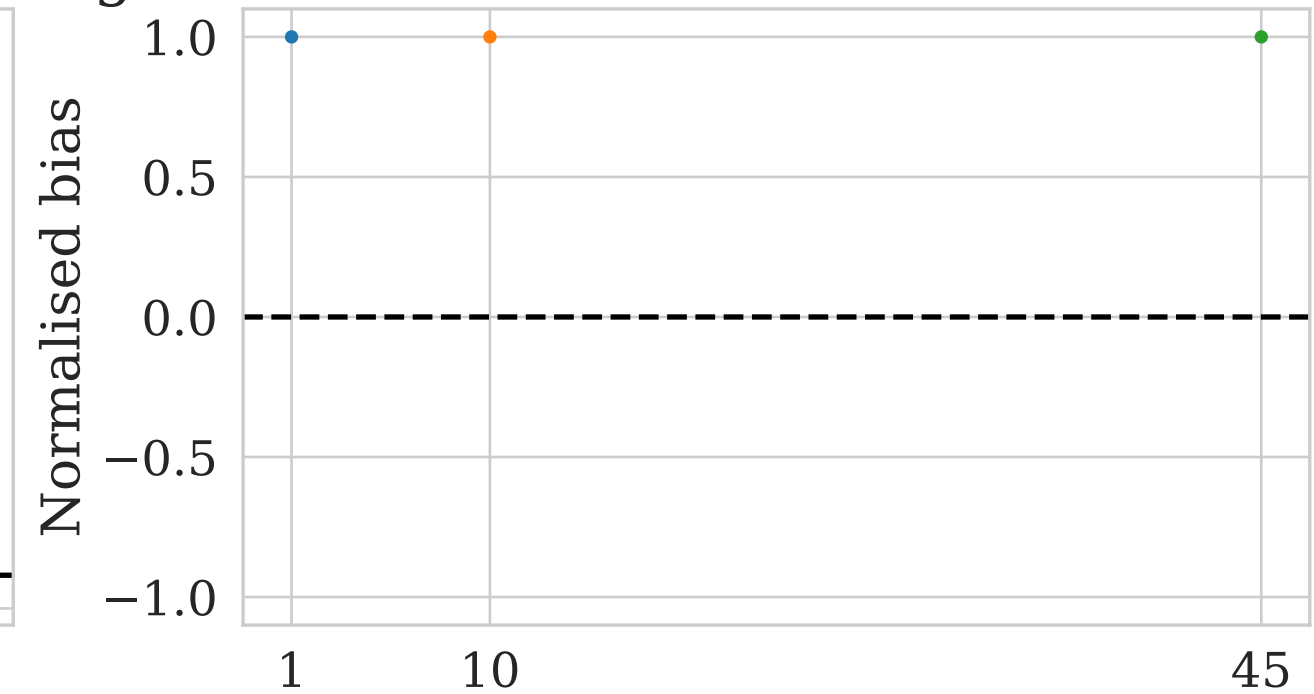

Class 0 Class 1 Class 2

33-uniform hypergraph, number of hyperedges: 1

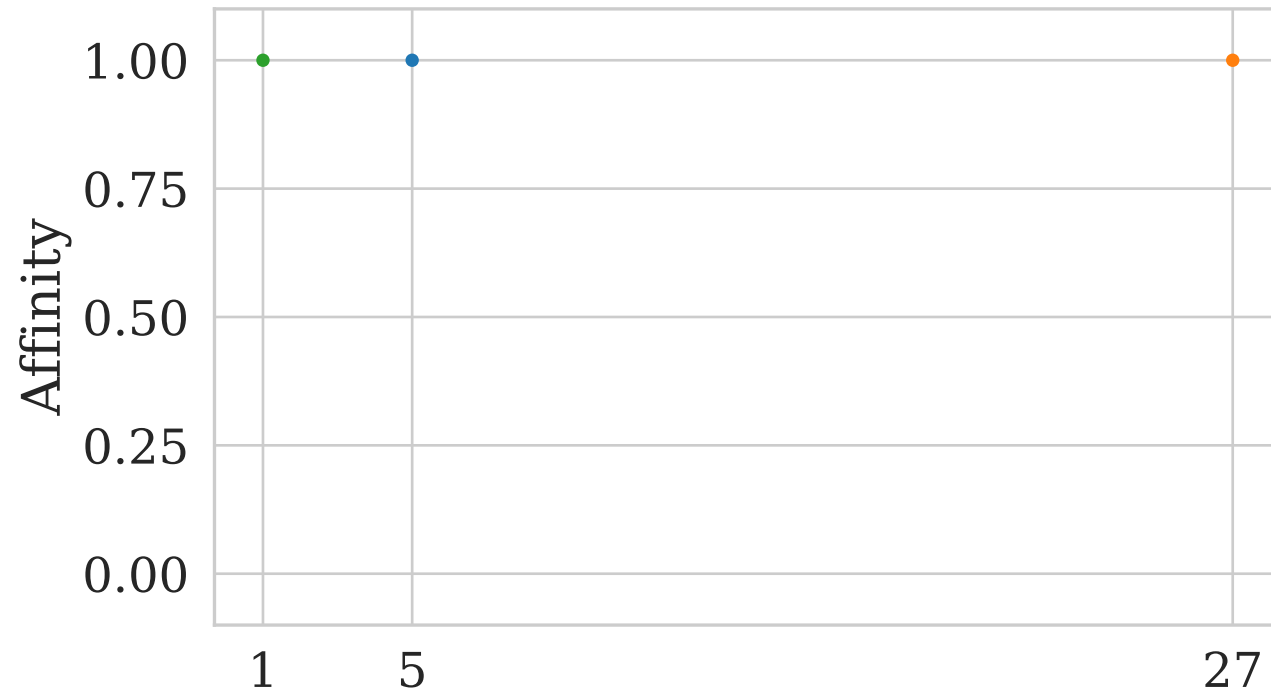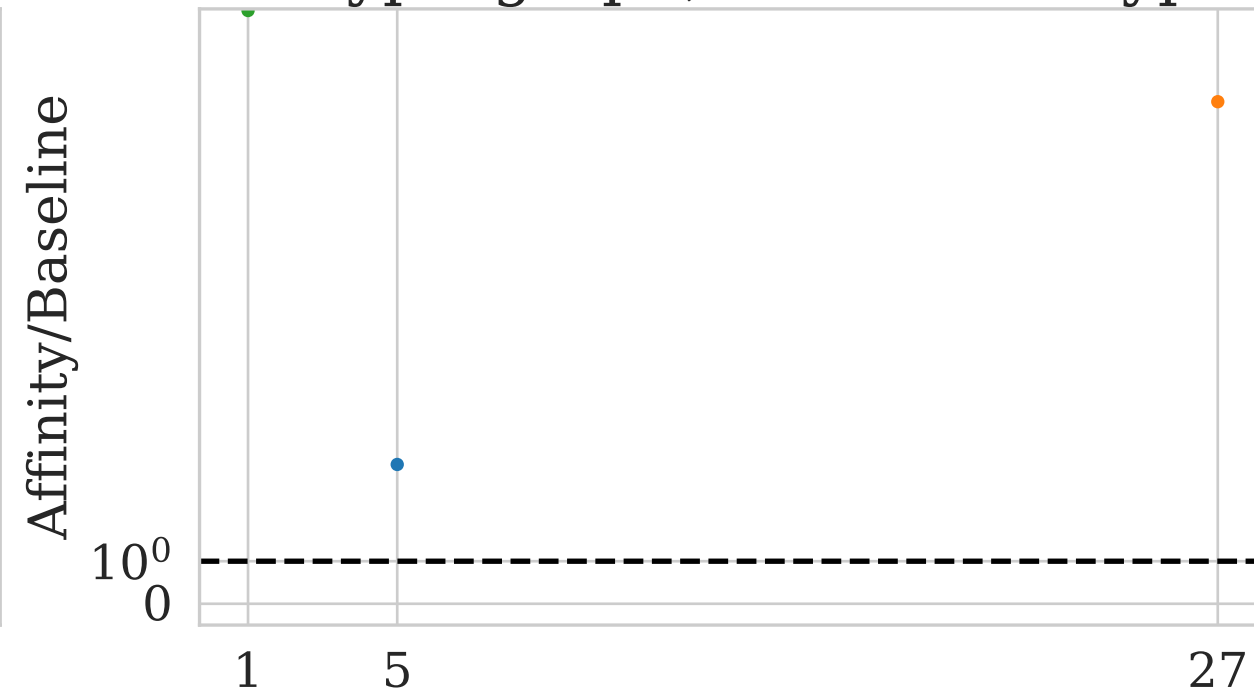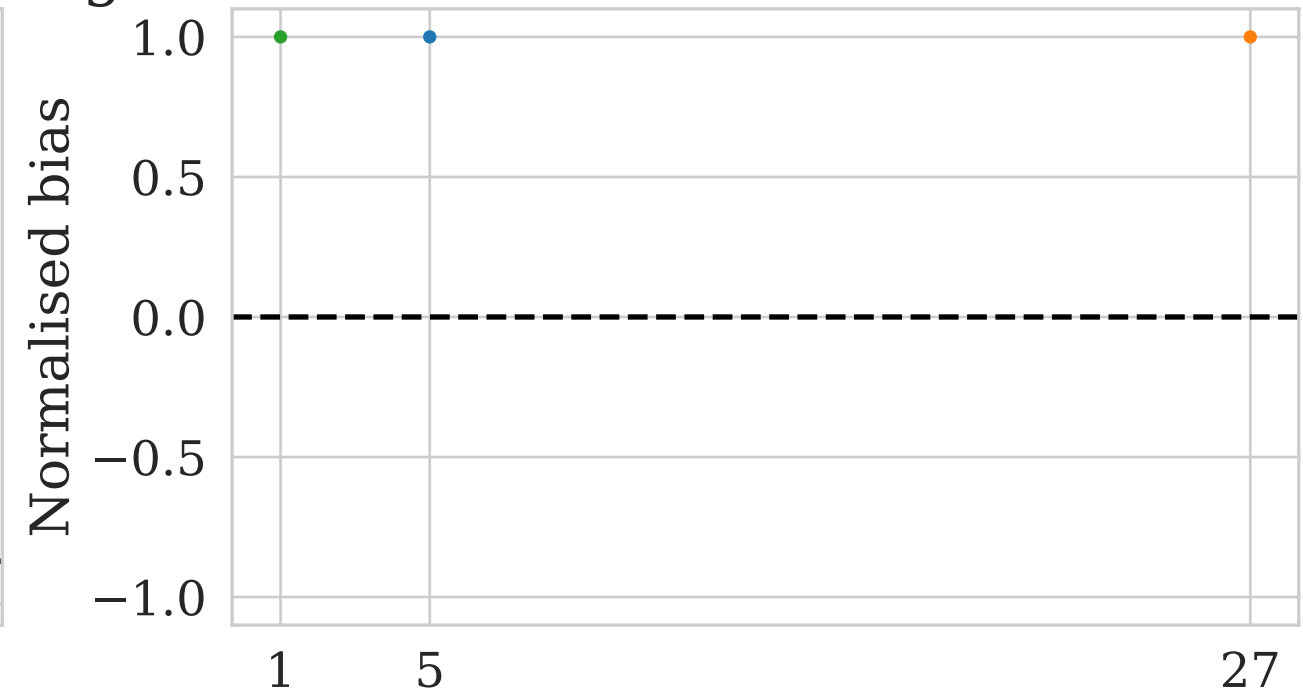

Class 0    Class 1    Class 2

53-uniform hypergraph, number of hyperedges: 1

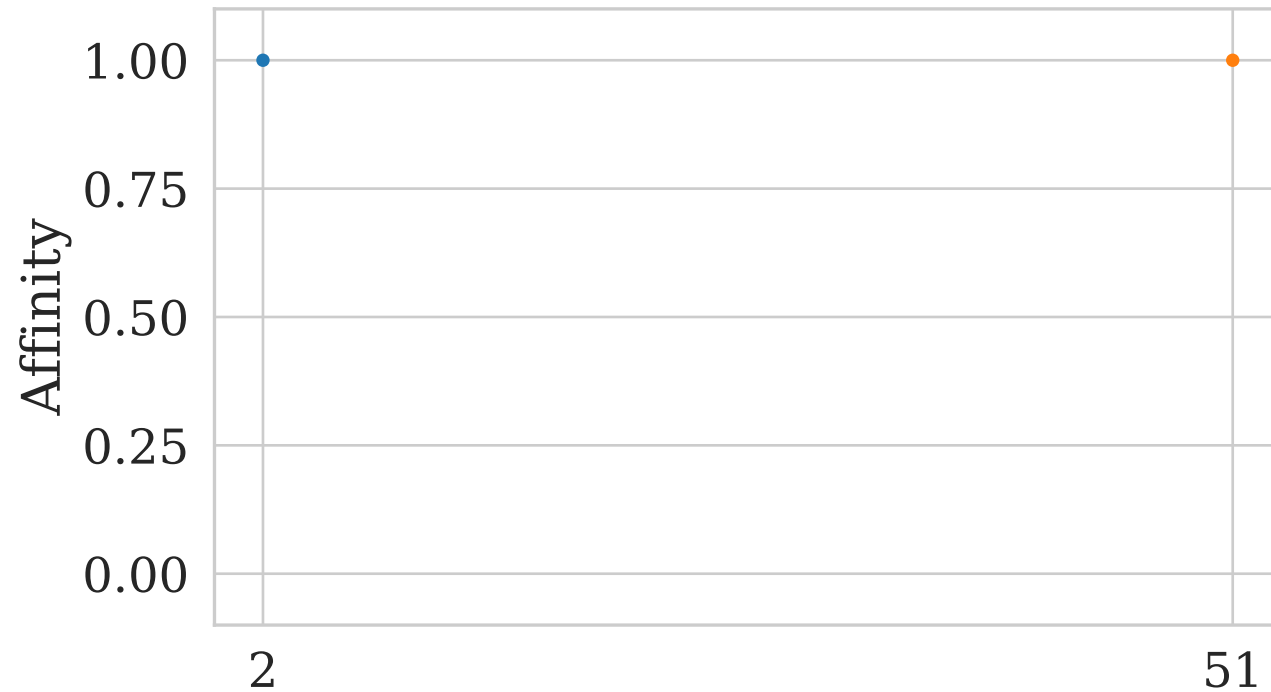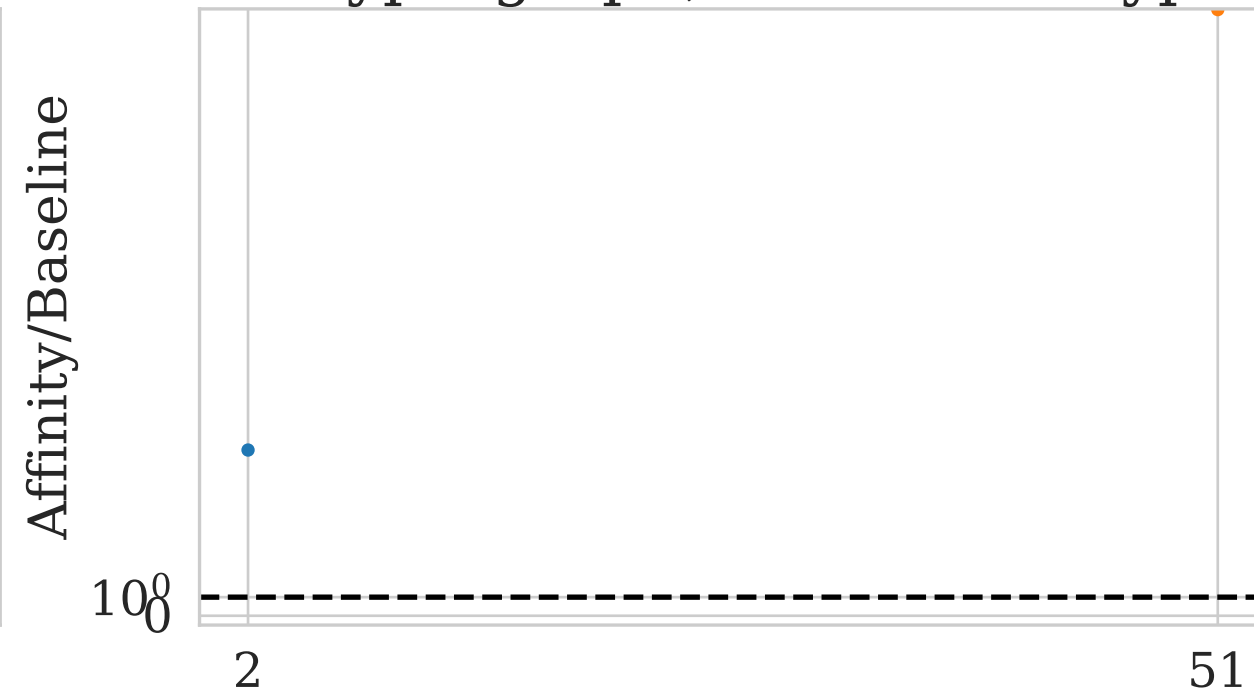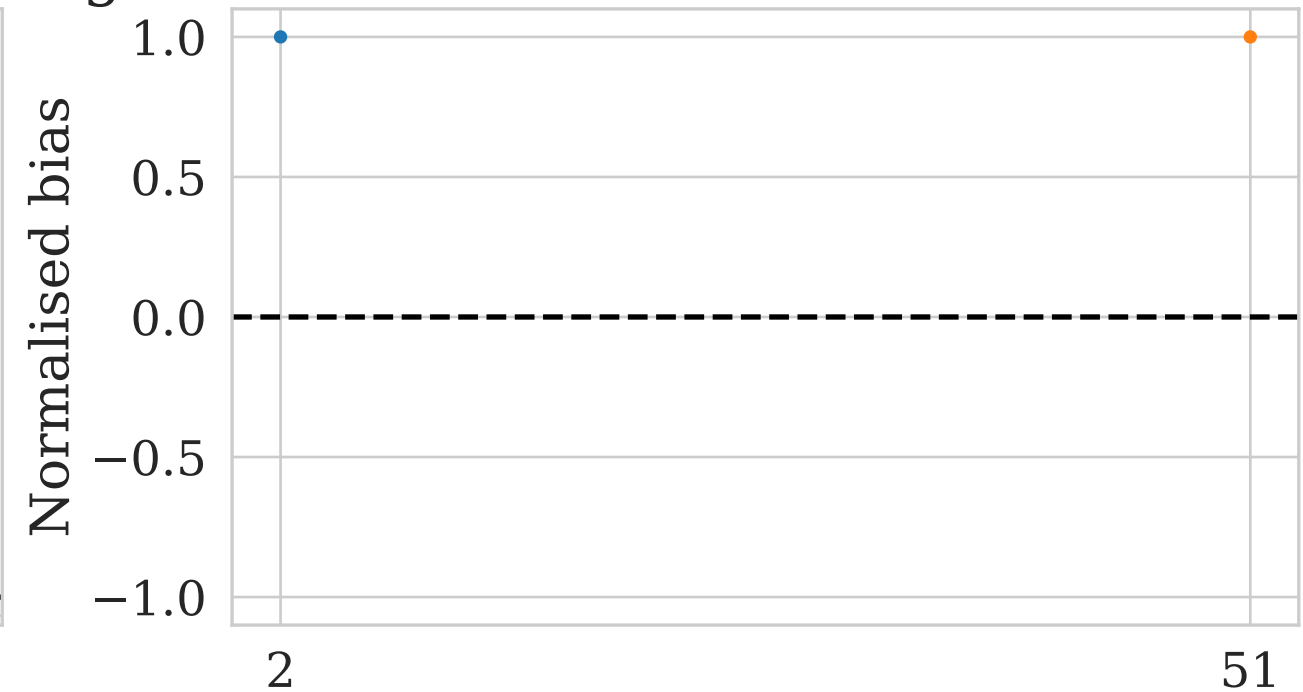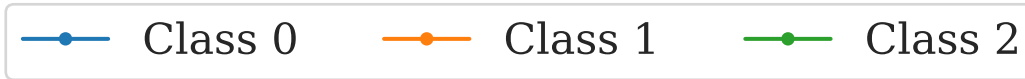

52-uniform hypergraph, number of hyperedges: 1

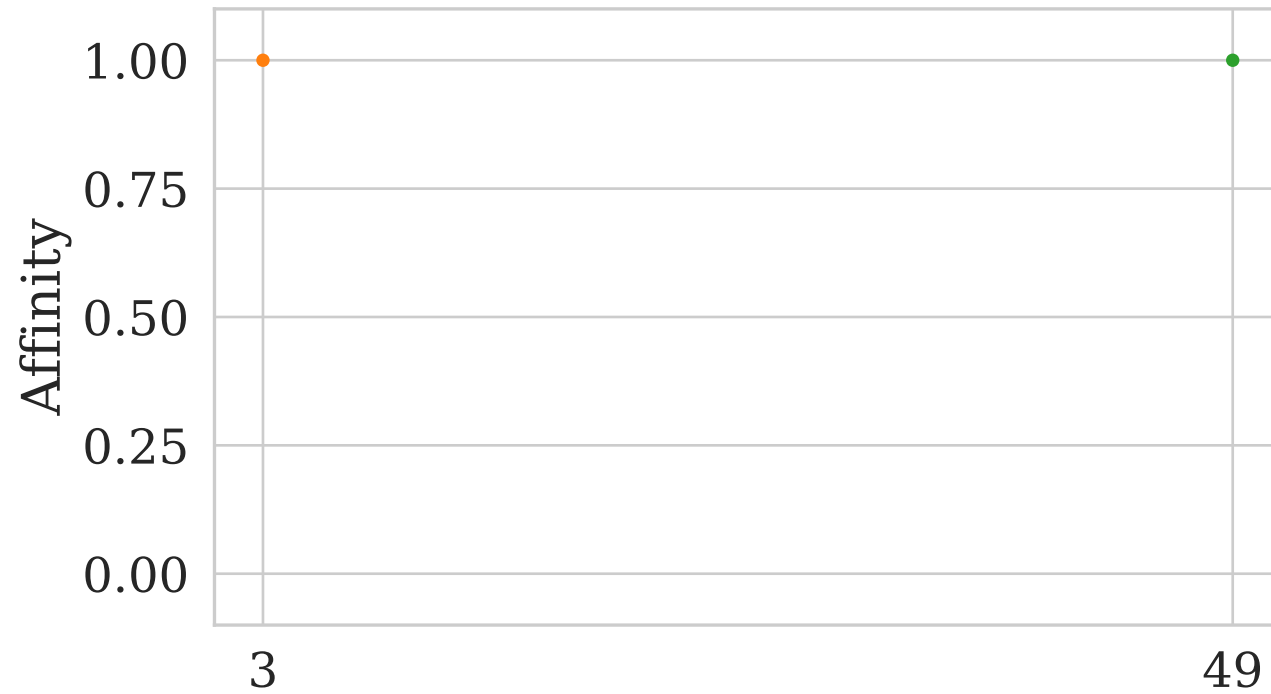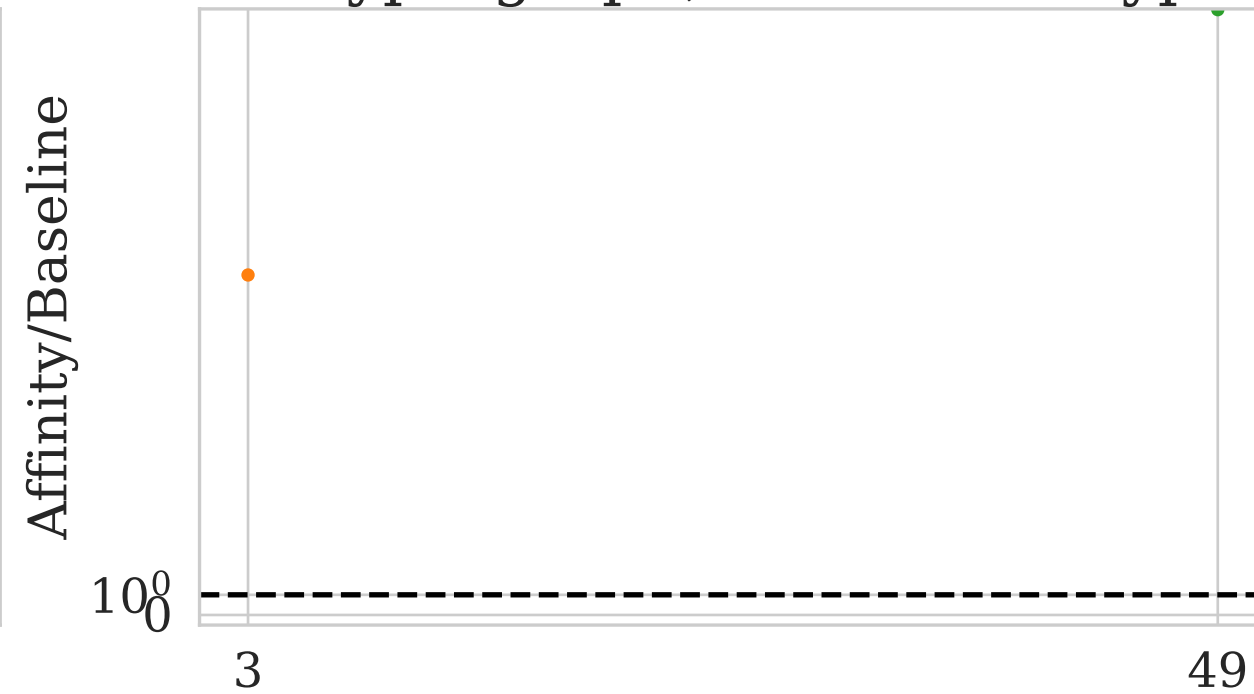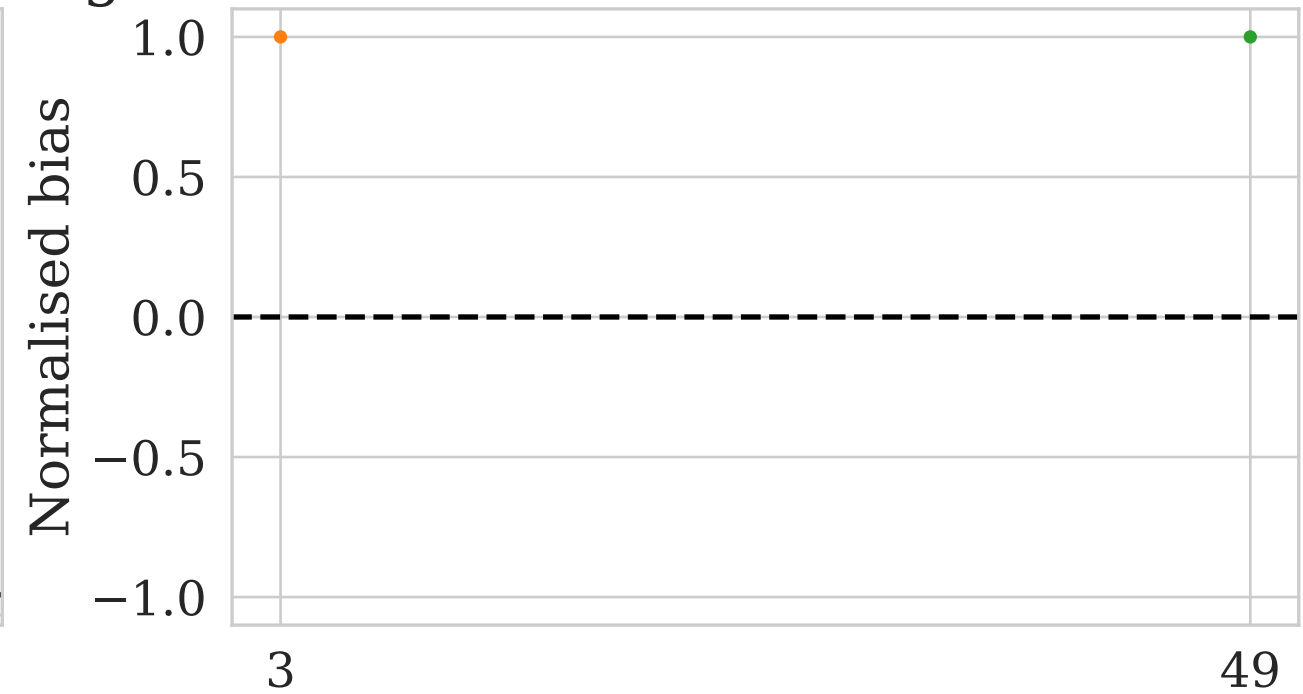

Class 0 Class 1 Class 2

50-uniform hypergraph, number of hyperedges: 1

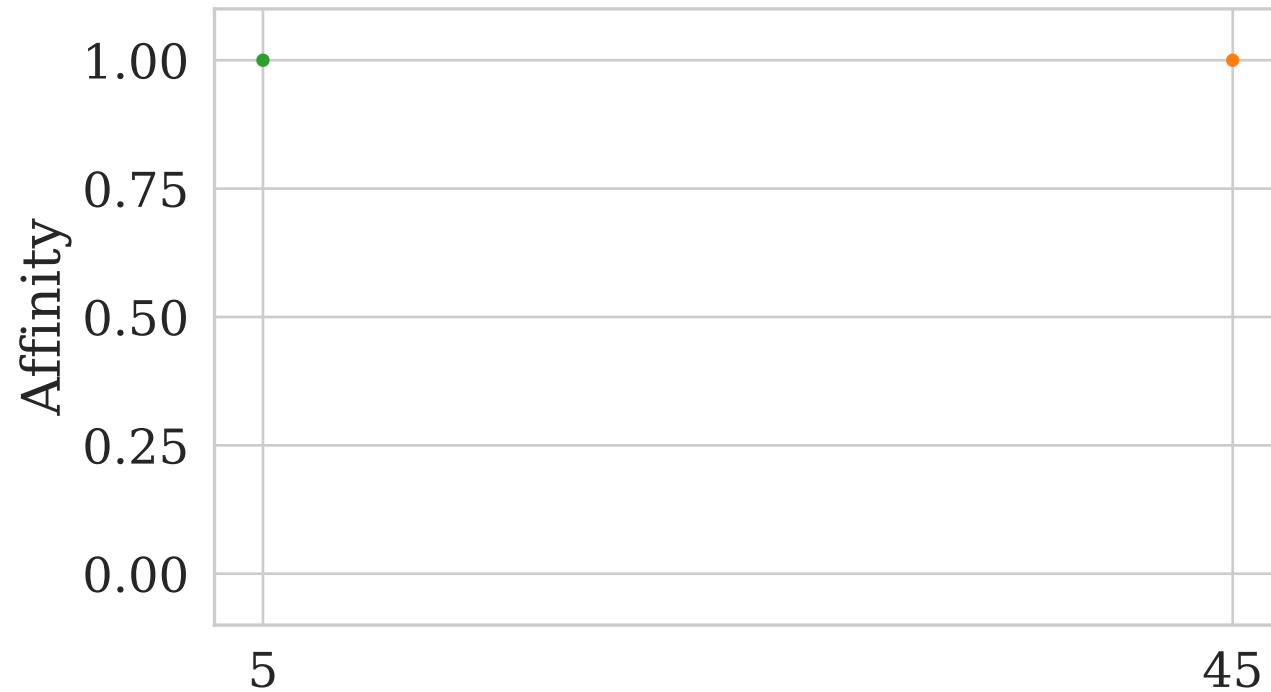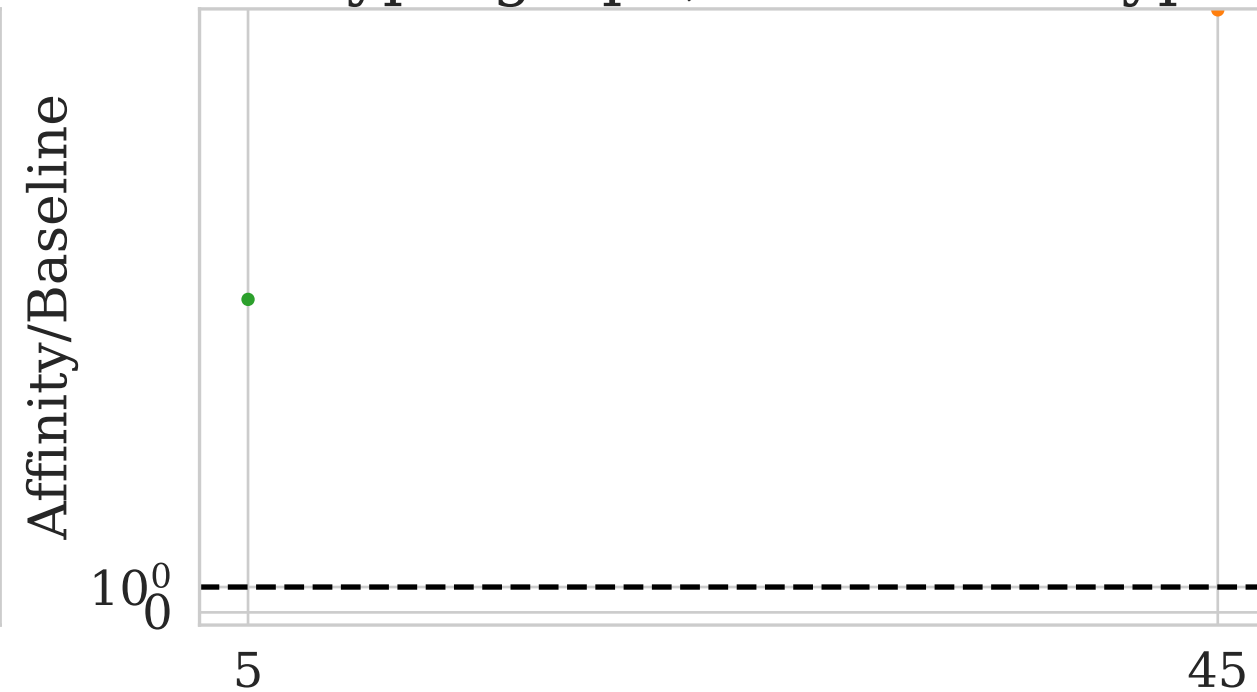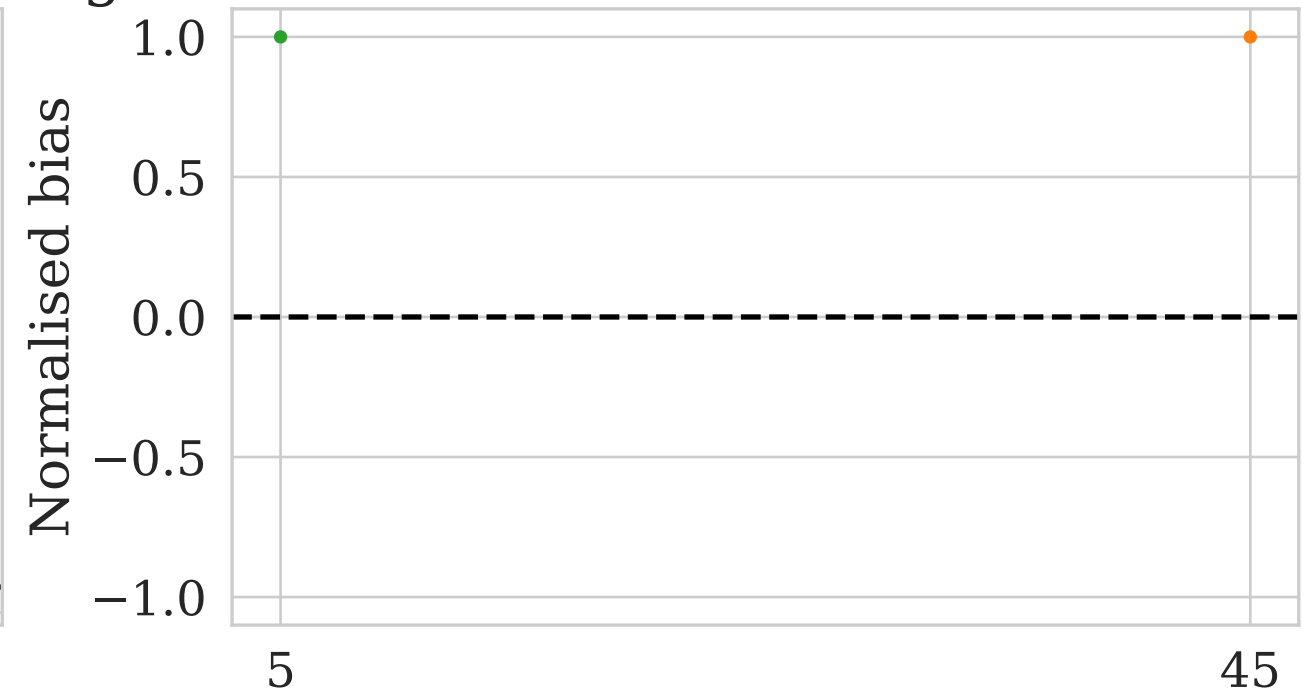

Class 0 Class 1 Class 2



49-uniform hypergraph, number of hyperedges: 1

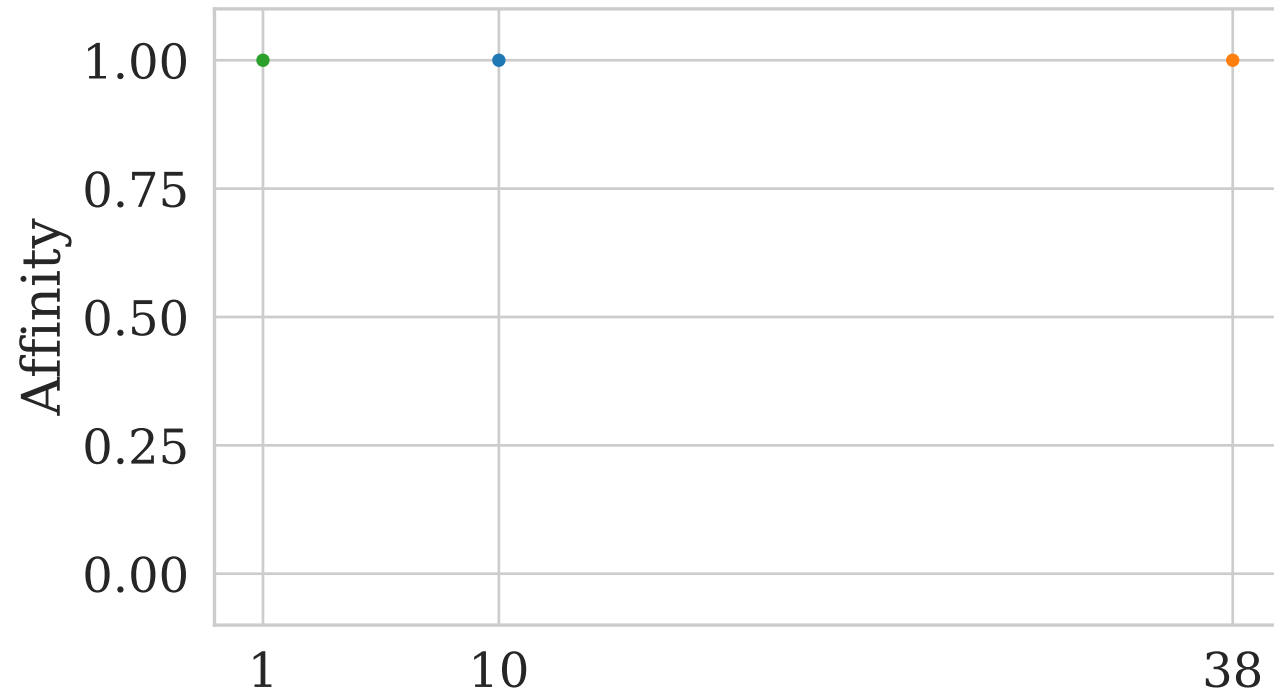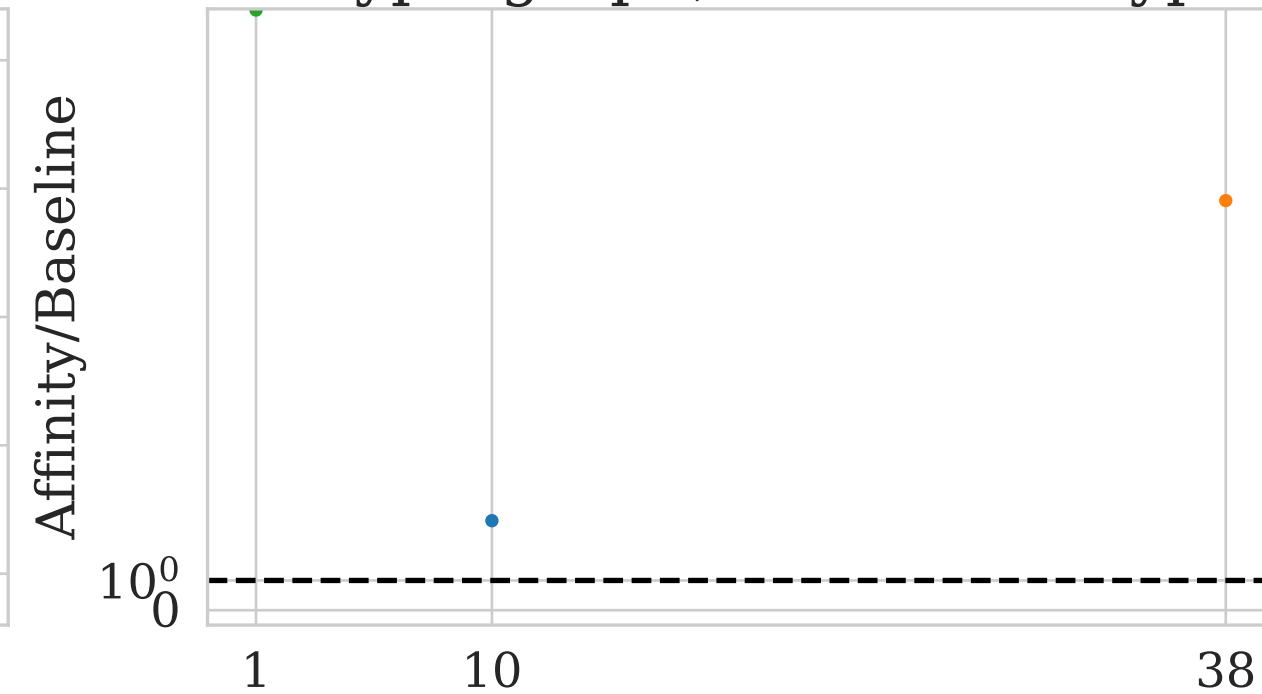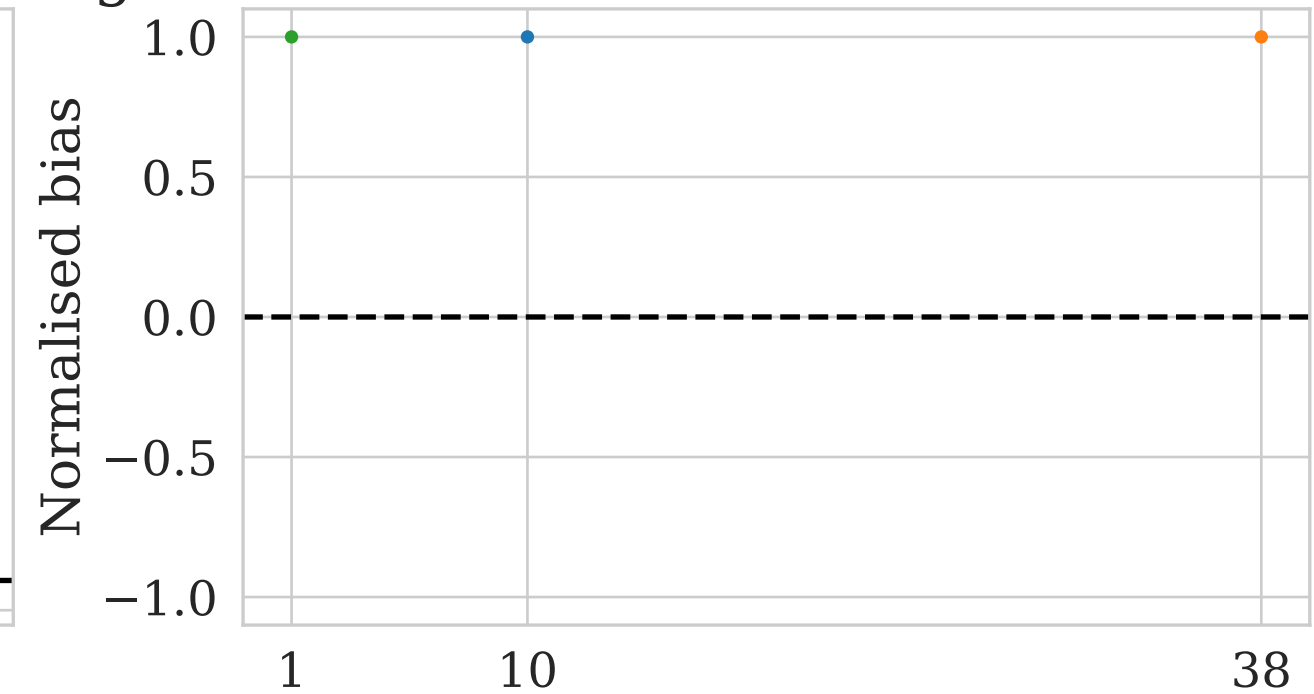

Class 0 Class 1 Class 2

47-uniform hypergraph, number of hyperedges: 1

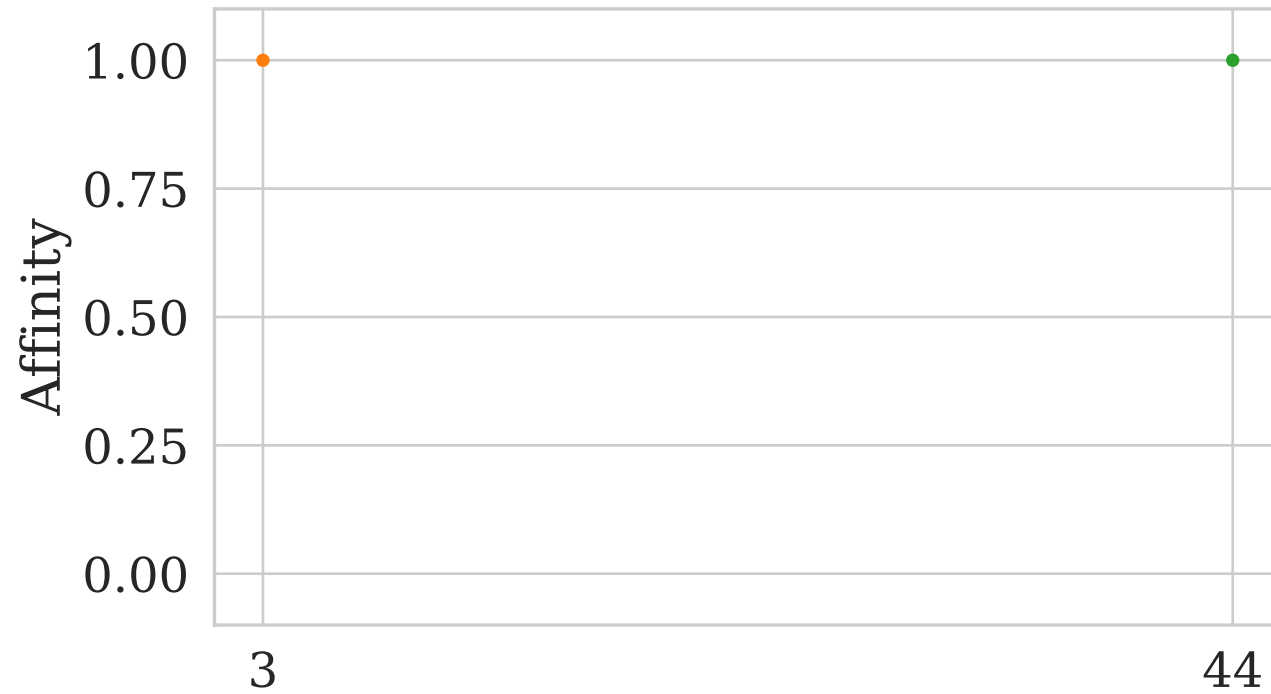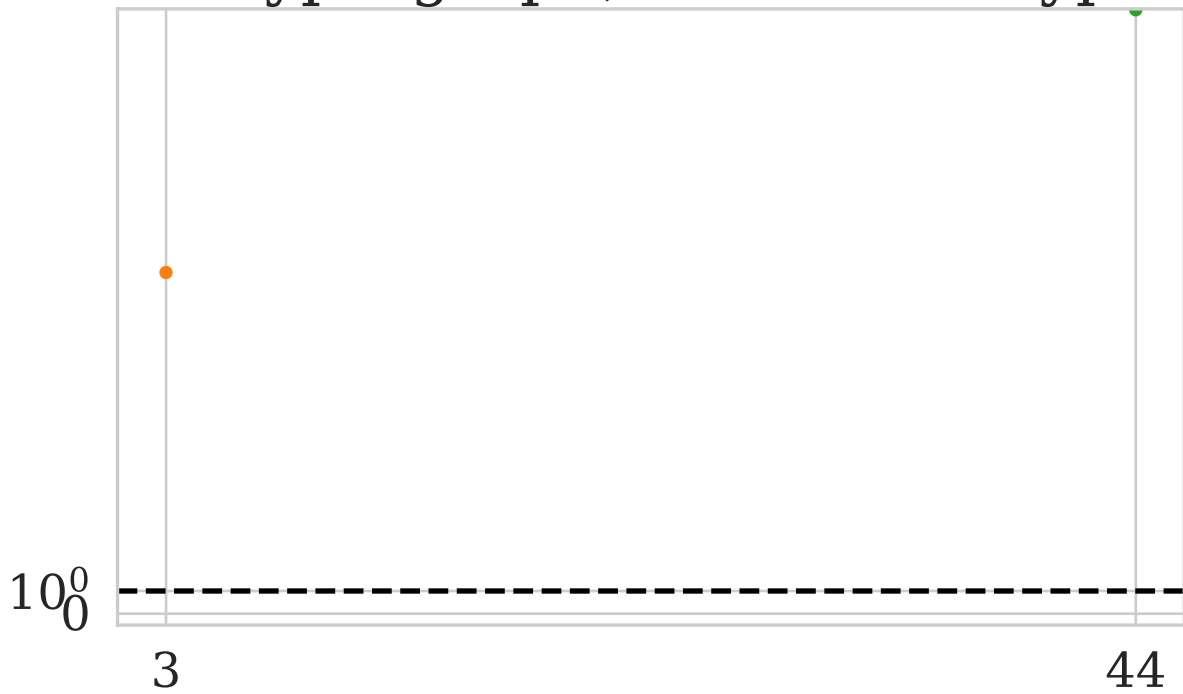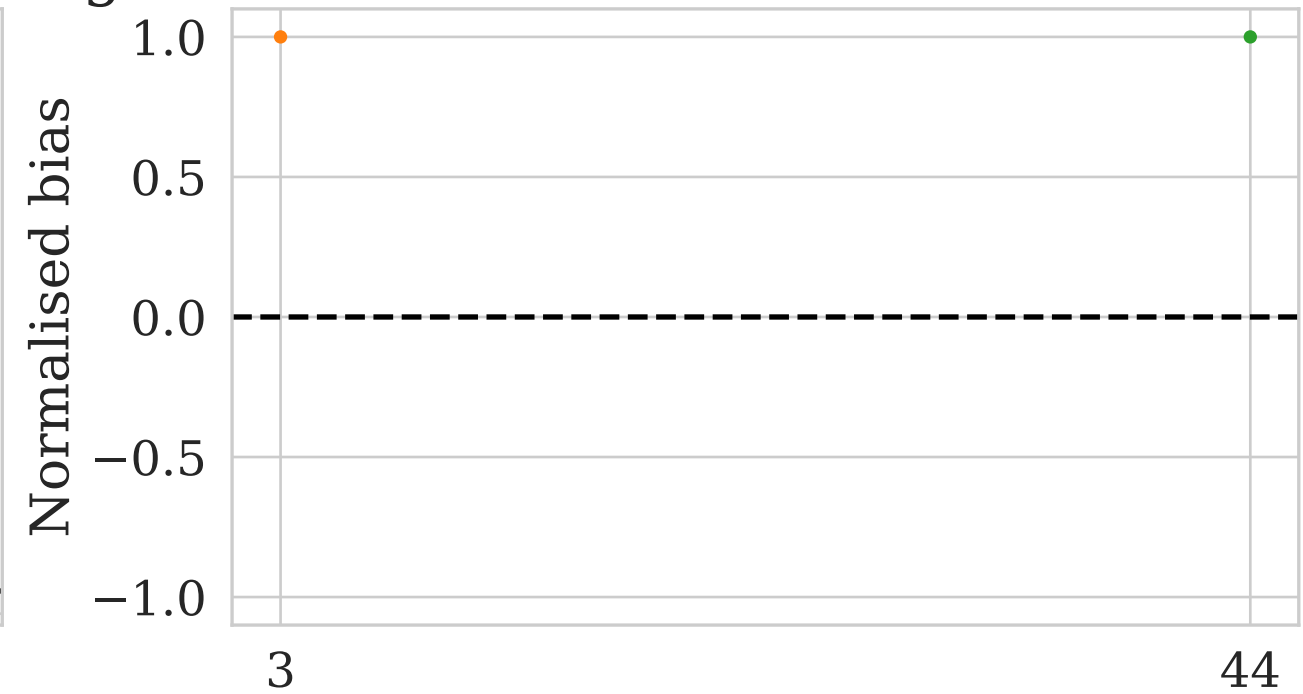

Class 0 Class 1 Class 2

44-uniform hypergraph, number of hyperedges: 1

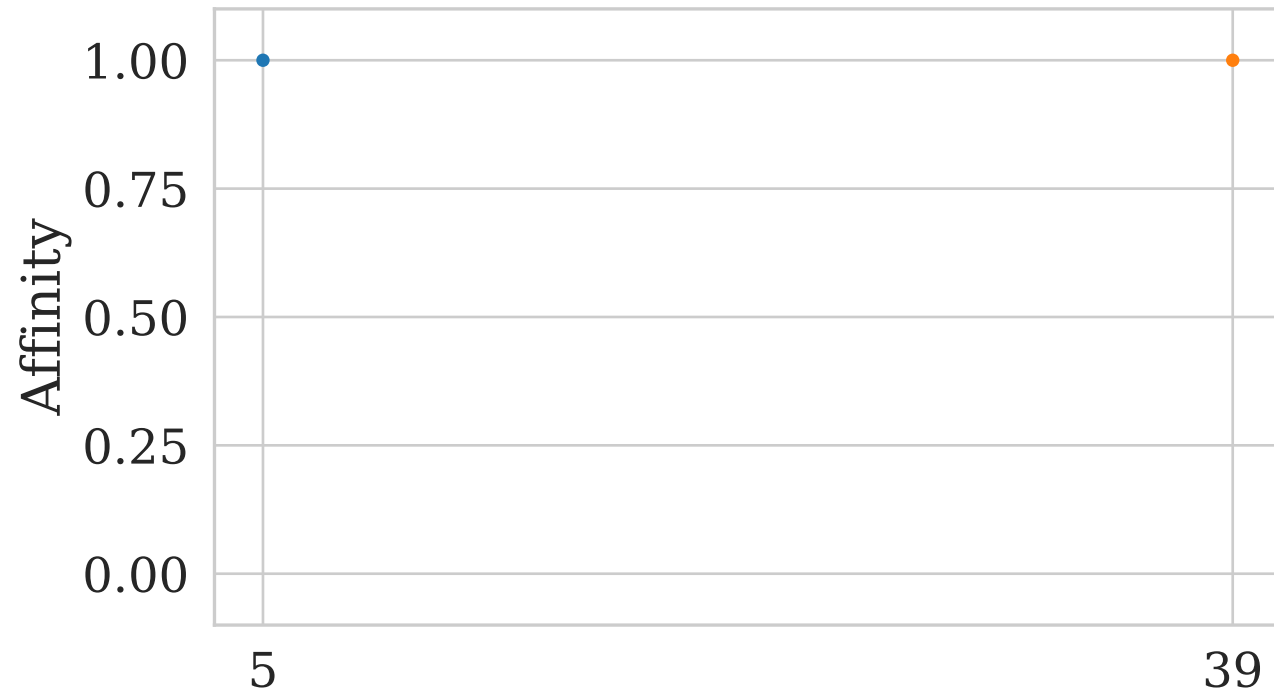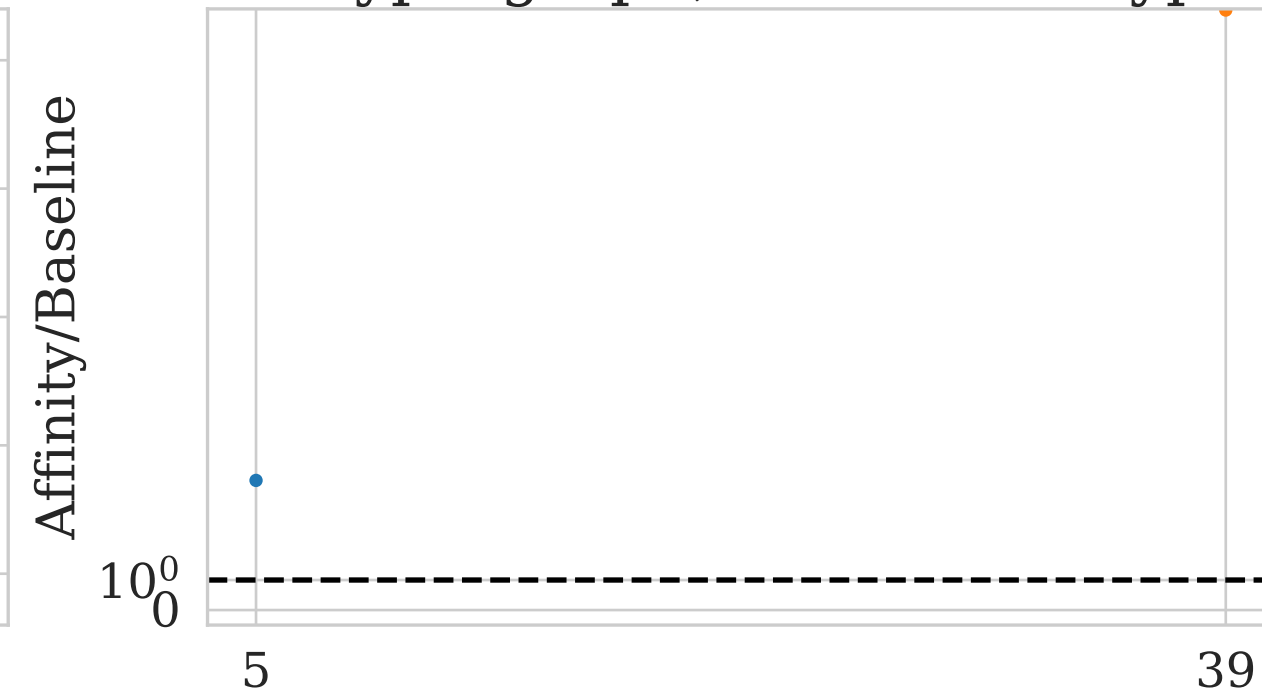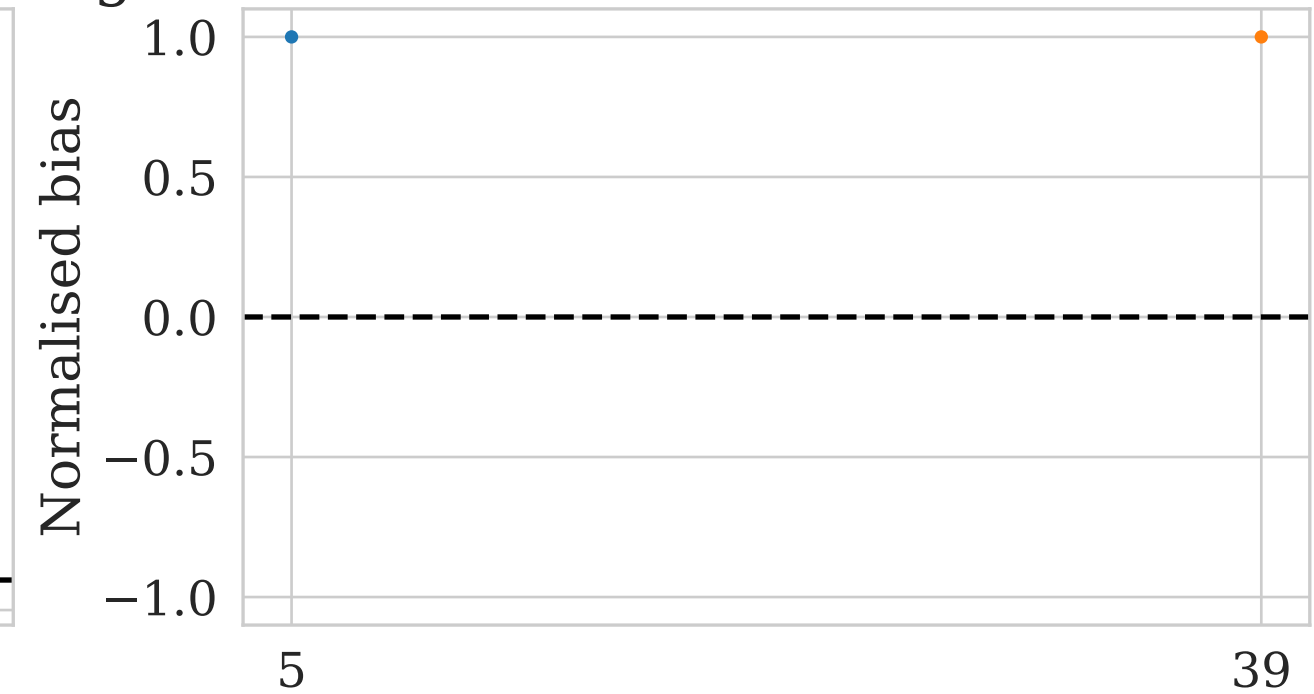

Class 0 Class 1 Class 2

39-uniform hypergraph, number of hyperedges: 1

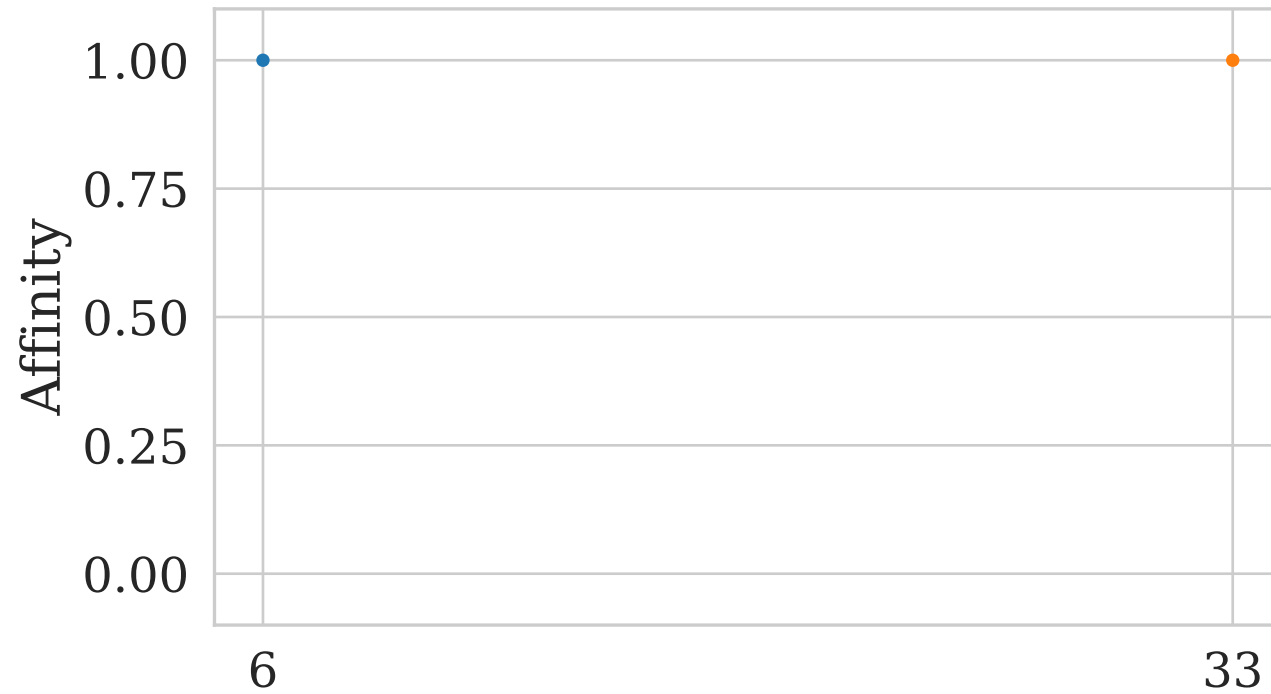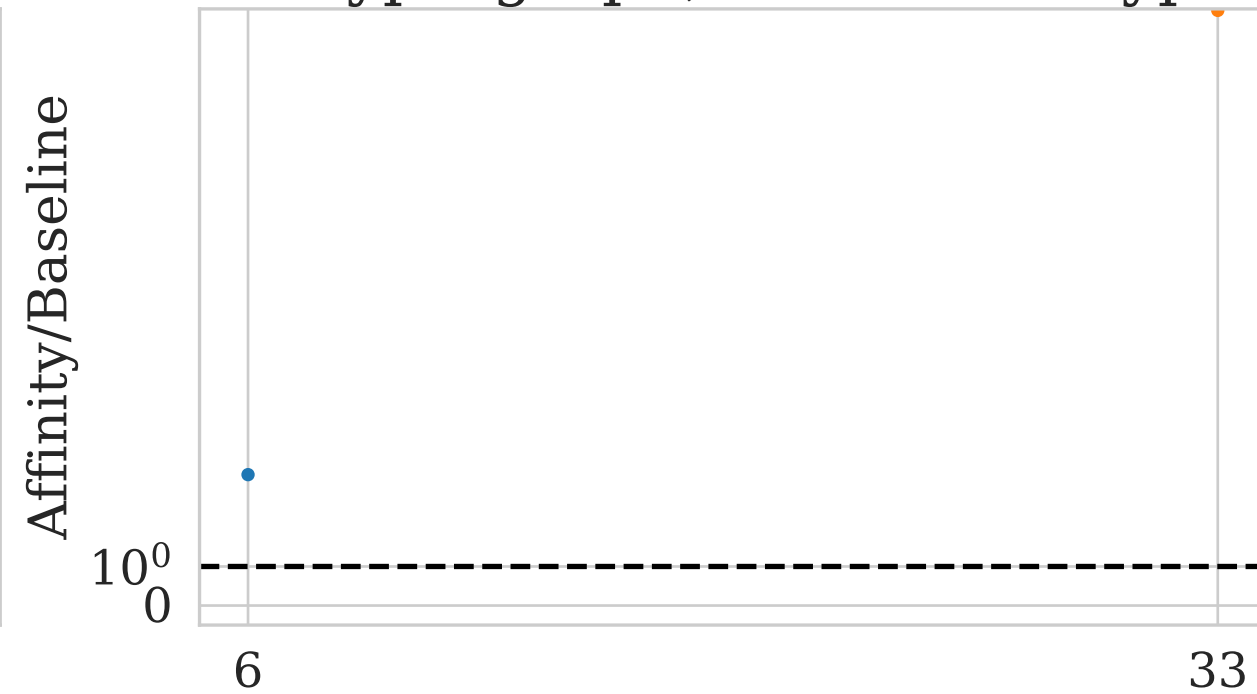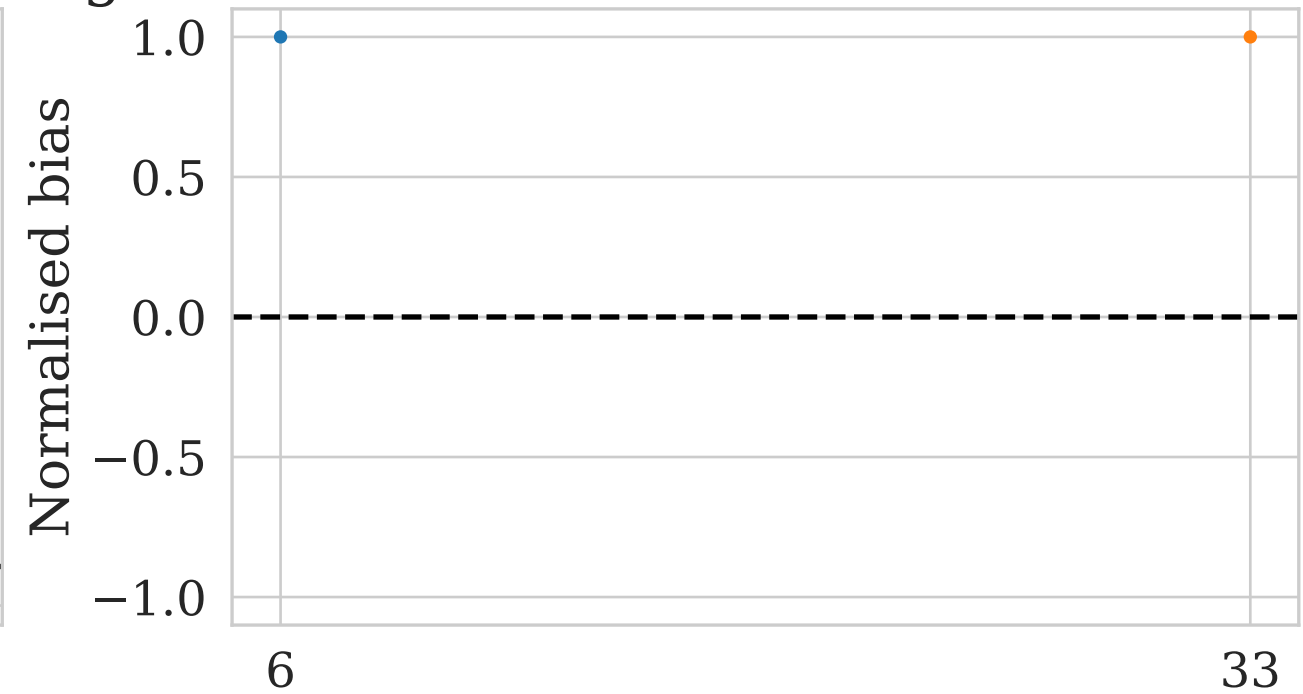

Class 0    Class 1    Class 2

32-uniform hypergraph, number of hyperedges: 1

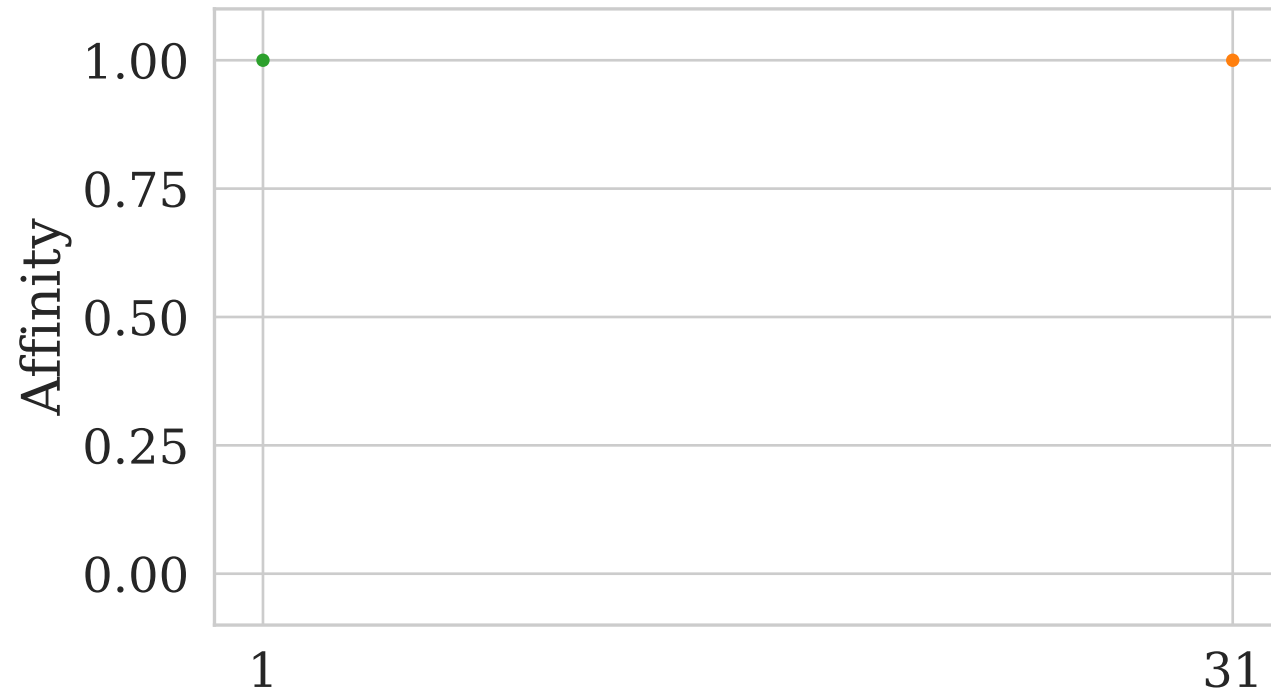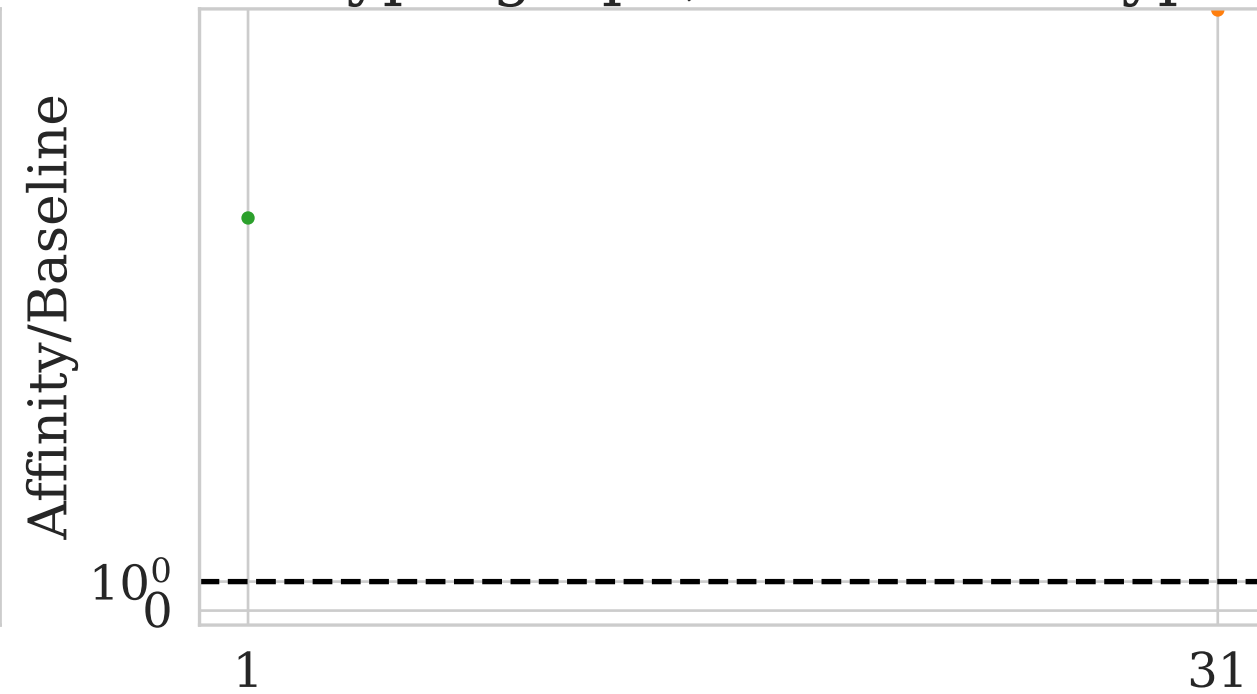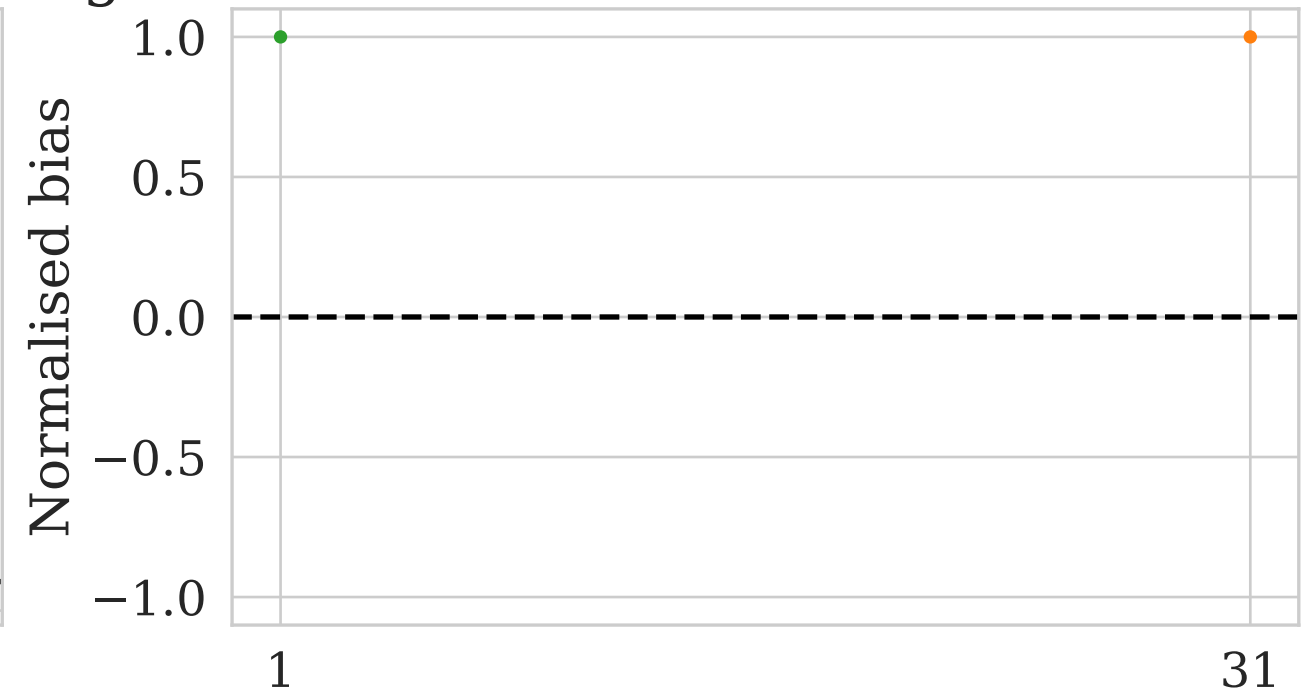

Class 0    Class 1    Class 2
