# Supplementary material
Source: ML conference proceedings conference paper supplement (https://openreview.net/forum?id=YPpkFqMX6V)

5-uniform hypergraph, number of hyperedges: 12311

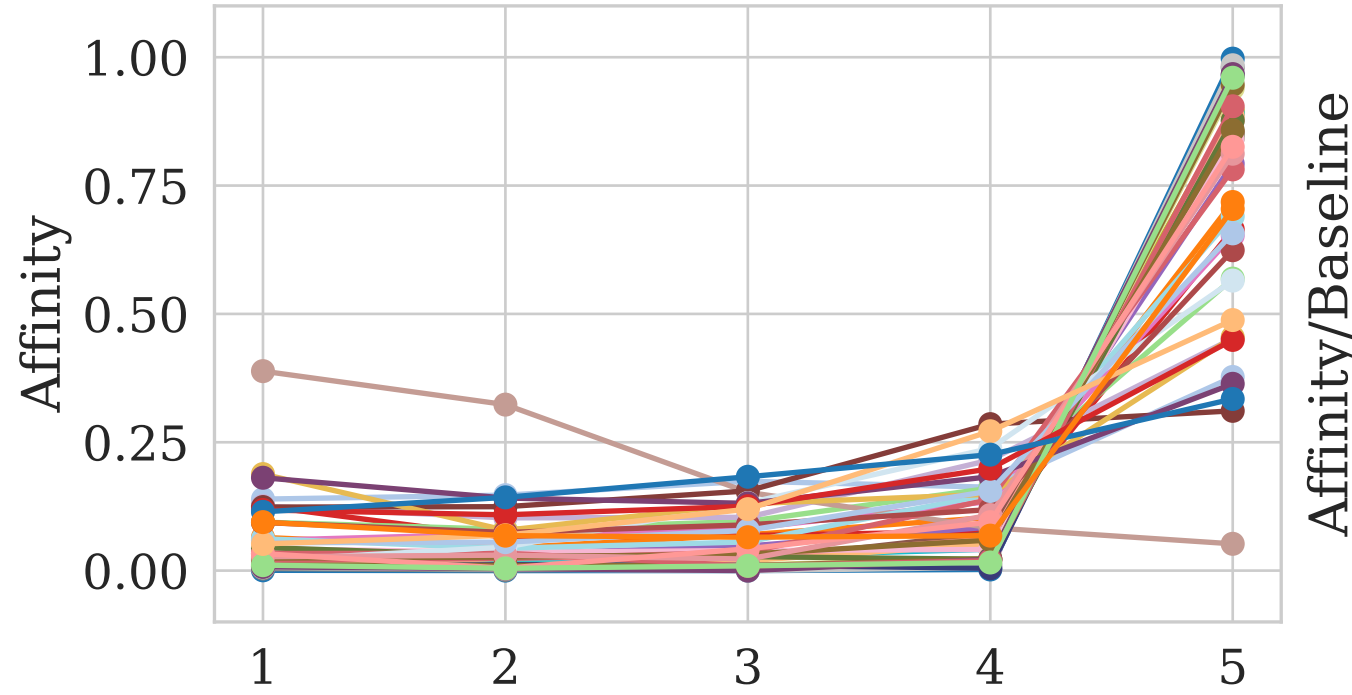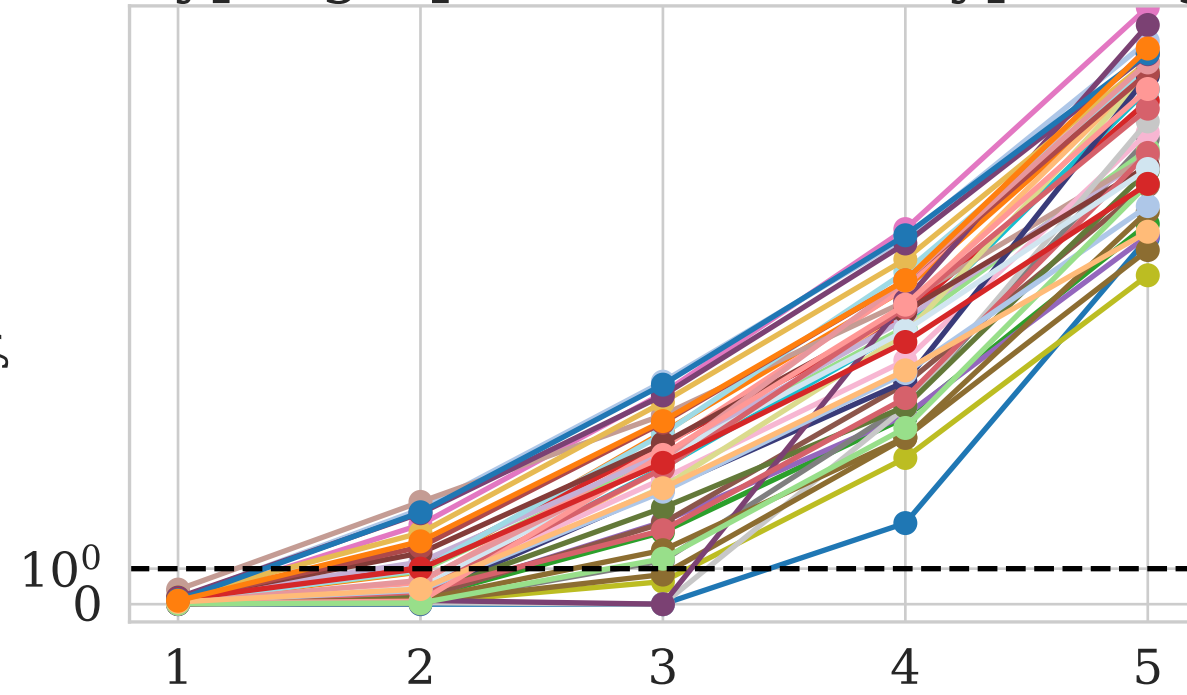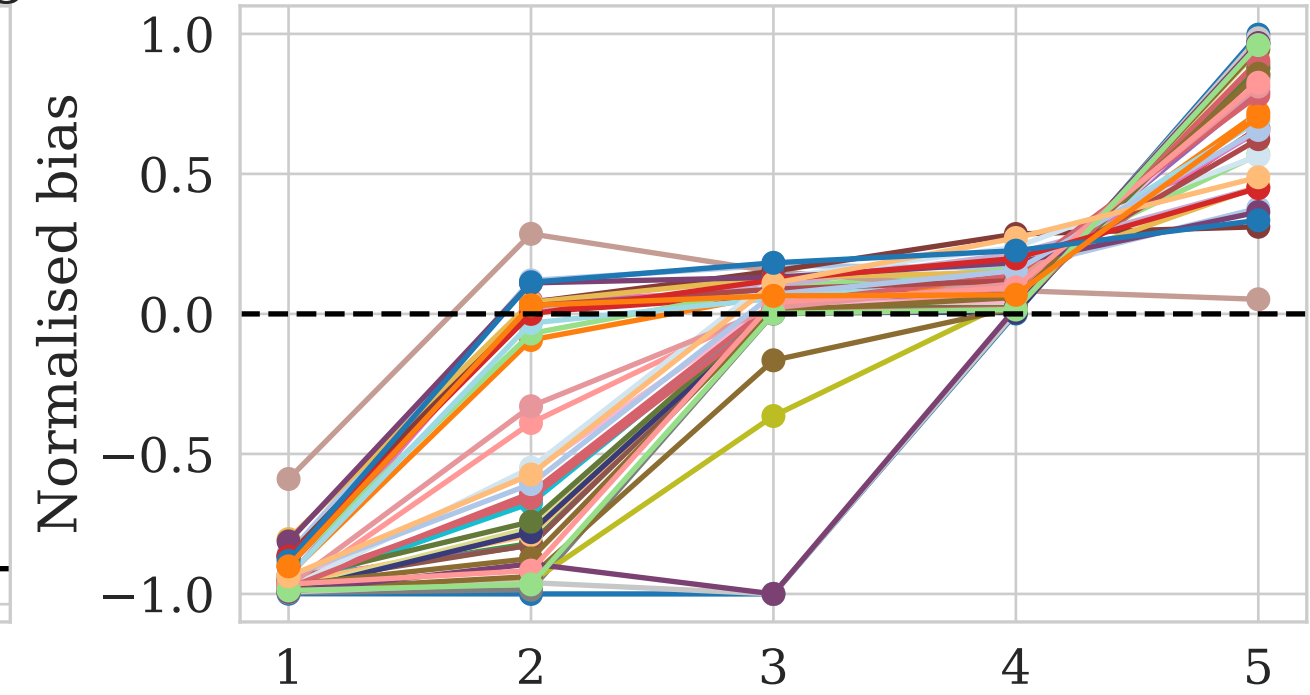

Supplement: supplementary_material [file attachment]

5-uniform hypergraph, number of hyperedges: 2012

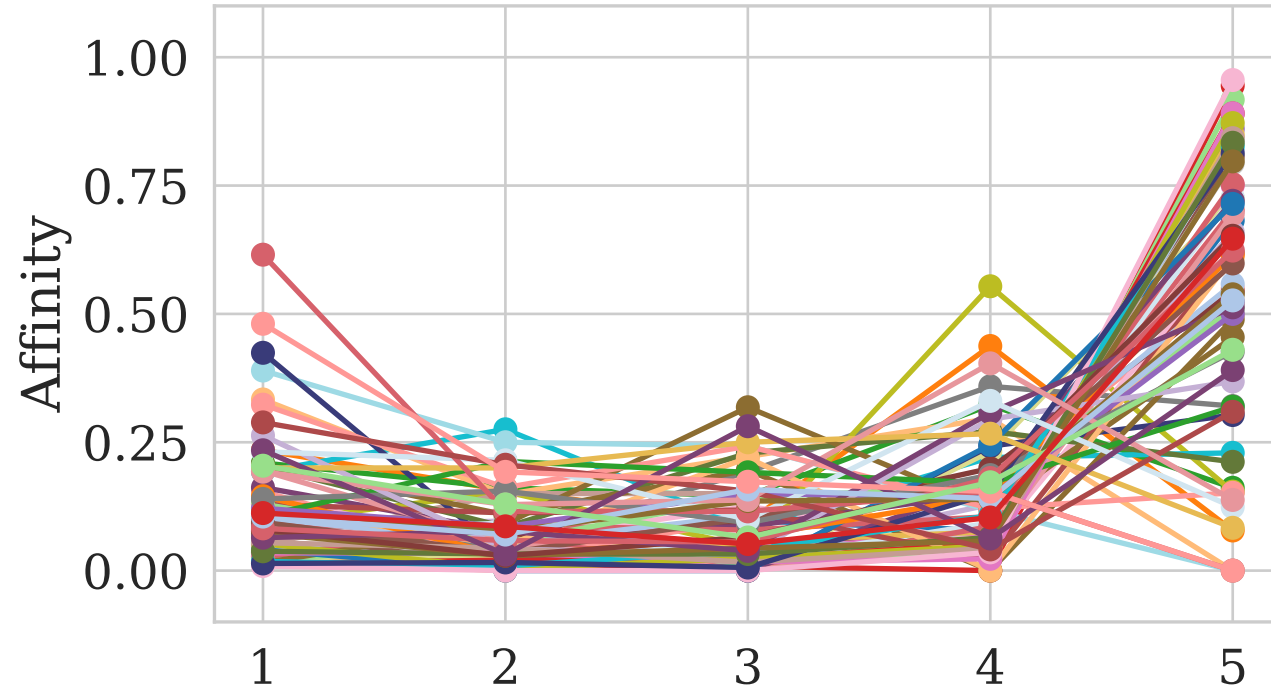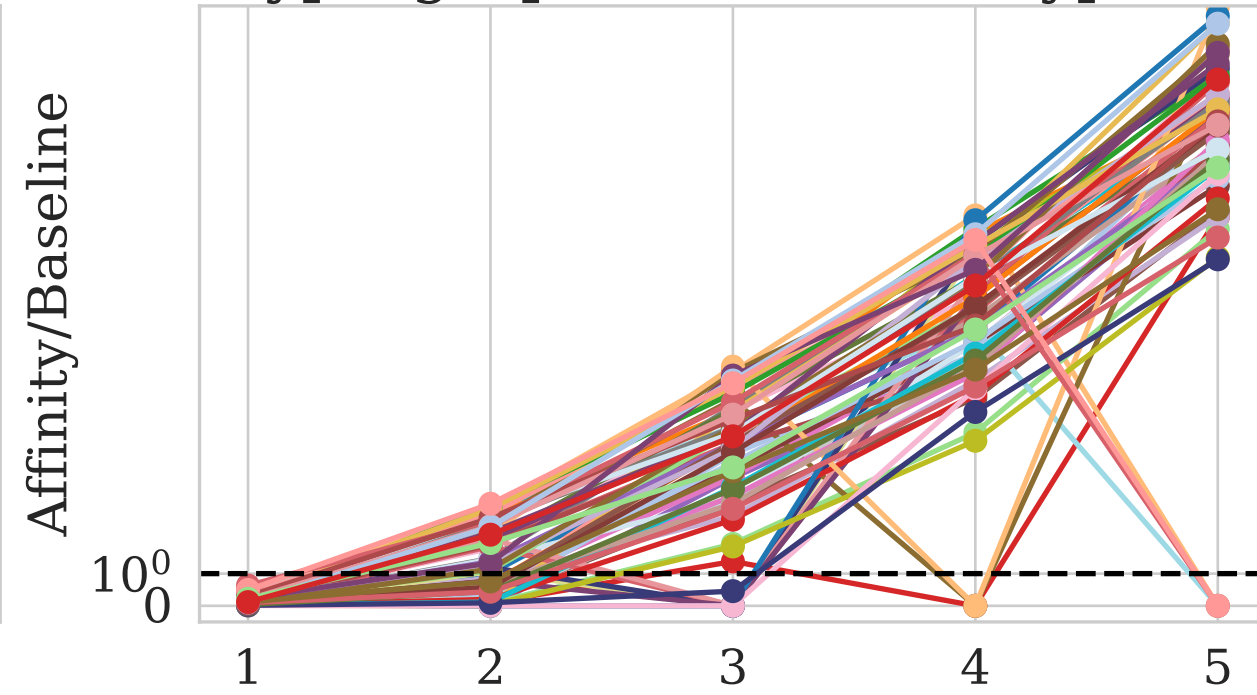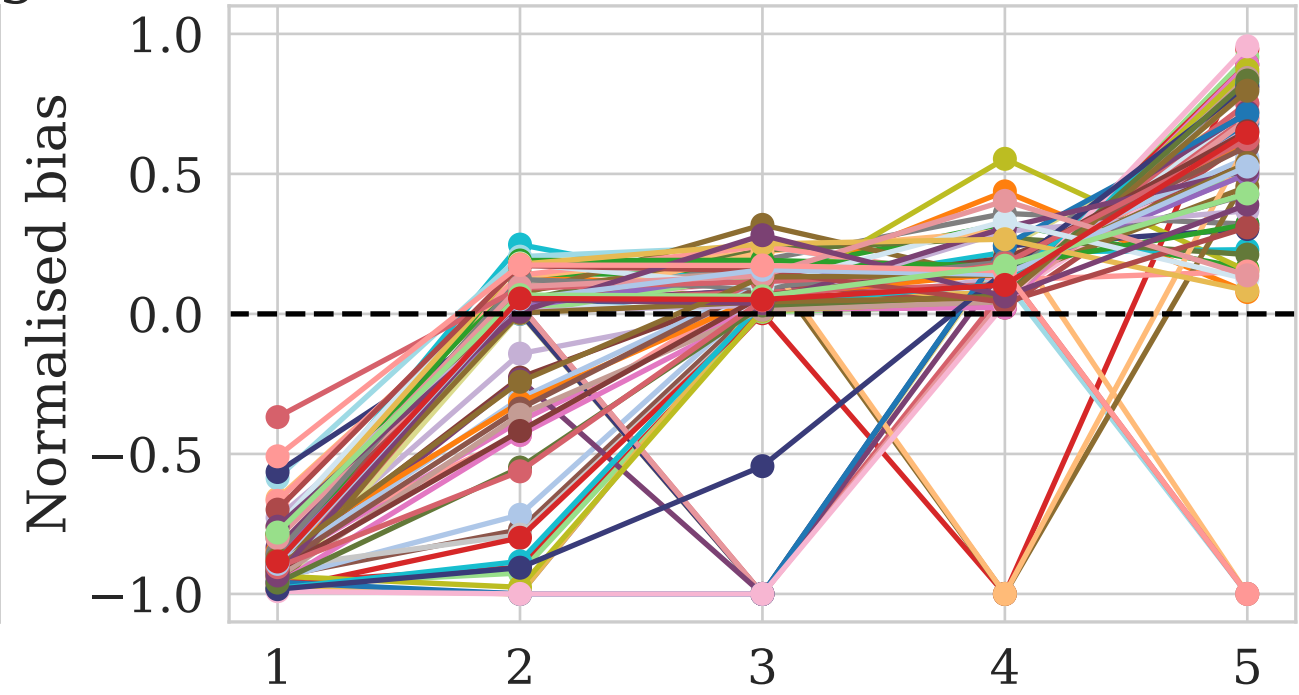

Supplement: supplementary_material [file attachment]
